# Supplementary material for: Whole Genome of Petroleum Hydrocarbon Degrading Rhodococcus indonesiensis isolated from Nacharam, Hyderabad, India
Source: Research Square preprint supplement (doi:10.21203/rs.3.rs-6309542/v1), 2025-09-26
Supplement: Supplementary file 1 [file 1124e6c990af3dd5eebd88b3.docx]

**
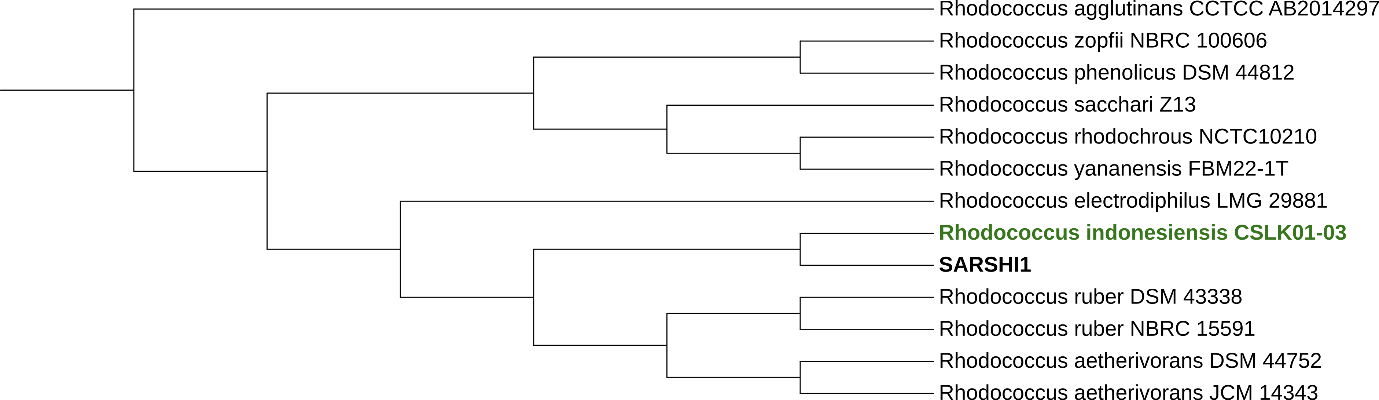
**

**Fig. 1 SSU Tree of SARSHI1**


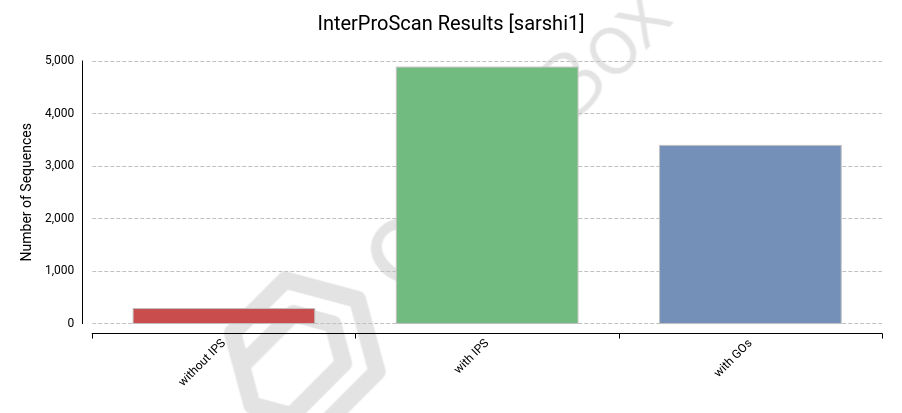


**Fig. 2: InterProScan Hits for SARSHI1**


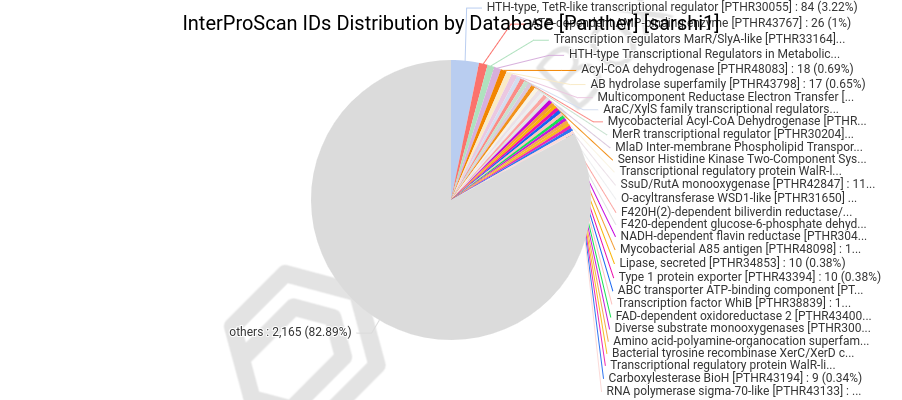


**Fig. 3: Panther based functional annotation of the SARSHI1**


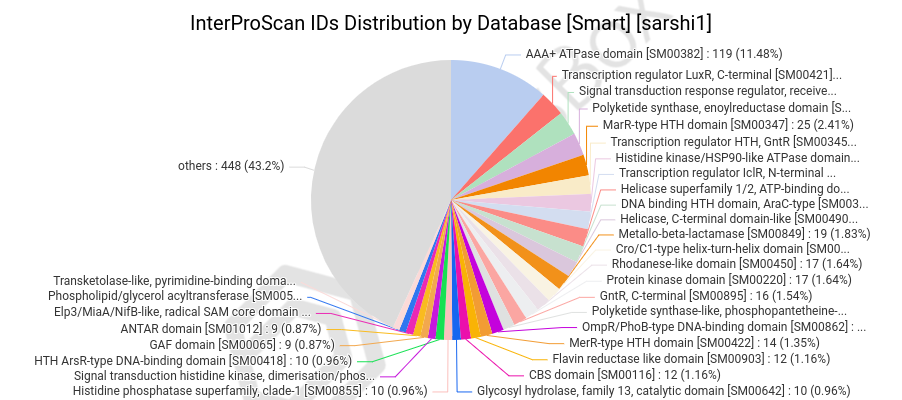


**Fig. 4: SMART based functional annotation of the SARSHI1**


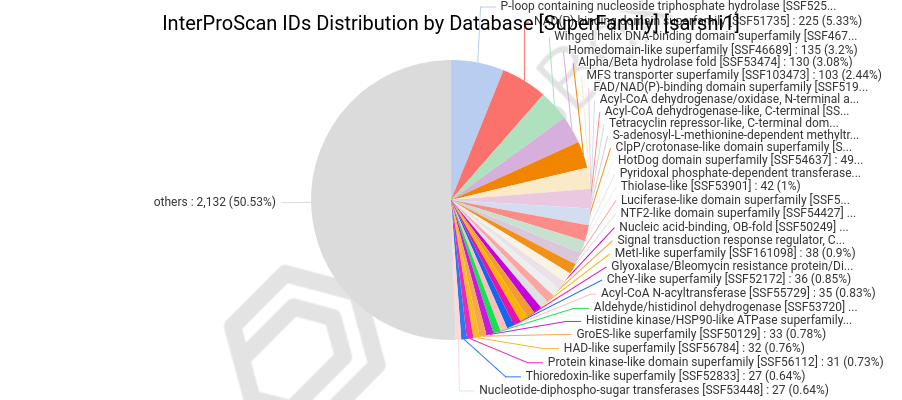


**Fig. 5: SuperFamily-based functional annotation of the SARSHI1**

**Table 1: Pairwise comparisons of SARSHI1 genome vs. type-strain genomes**

| **Query** | **Subject** | **d0** | **C.I. d0** | **d4** | **C.I. d4** | **d6** | **C.I. d6** | **Diff. G+C Percent** |
| --- | --- | --- | --- | --- | --- | --- | --- | --- |
| SARSHI1 | *Rhodococcus indonesiensis* CSLK01-03 | 89.2 | [85.9 - 91.9] | 88.2 | [85.7 - 90.3] | 91.7 | [89.2 - 93.7] | 0.09 |
| SARSHI1 | *Rhodococcus electrodiphilus* LMG 29881 | 82.8 | [78.9 - 86.0] | 60.8 | [58.0 - 63.6] | 81.2 | [77.8 - 84.1] | 0.45 |
| SARSHI1 | *Rhodococcus ruber* NBRC 15591 | 81.1 | [77.2 - 84.5] | 60.6 | [57.7 - 63.4] | 79.7 | [76.3 - 82.8] | 0.6 |
| SARSHI1 | *Rhodococcus ruber* DSM 43338 | 80.2 | [76.3 - 83.6] | 60.6 | [57.8 - 63.4] | 79 | [75.6 - 82.1] | 0.59 |
| SARSHI1 | Rhodococcus aetherivorans JCM 14343 | 69.7 | [65.8 - 73.4] | 43 | [40.5 - 45.5] | 64.6 | [61.3 - 67.9] | 0.2 |
| SARSHI1 | *Rhodococcus aetherivorans* DSM 44752 | 69.7 | [65.8 - 73.3] | 43 | [40.5 - 45.6] | 64.6 | [61.2 - 67.8] | 0.18 |
| SARSHI1 | *Rhodococcus zopfii* NBRC 100606 | 27.1 | [23.8 - 30.8] | 22.5 | [20.2 - 24.9] | 25.1 | [22.2 - 28.2] | 1.84 |
| SARSHI1 | *Rhodococcus phenolicus* DSM 44812 | 25.9 | [22.6 - 29.5] | 22.2 | [20.0 - 24.7] | 24.1 | [21.2 - 27.2] | 1.72 |
| SARSHI1 | *Rhodococcus sacchari* Z13 | 26.6 | [23.2 - 30.2] | 22.1 | [19.8 - 24.5] | 24.6 | [21.7 - 27.7] | 0.27 |
| SARSHI1 | *Rhodococcus rhodochrous* NCTC10210 | 25.3 | [22.0 - 29.0] | 21.4 | [19.2 - 23.9] | 23.5 | [20.7 - 26.6] | 1.91 |
| SARSHI1 | *Rhodococcus yananensis* FBM22-1T | 22.8 | [19.5 - 26.5] | 21.3 | [19.1 - 23.7] | 21.6 | [18.8 - 24.6] | 1.41 |
| SARSHI1 | *Rhodococcus agglutinans* CCTCC AB2014297 | 19.8 | [16.6 - 23.4] | 20.6 | [18.3 - 23.0] | 19.1 | [16.4 - 22.1] | 0.82 |

**Table 2: Type-based Species and Subspecies clustering**

| **Species cluster** | **Subspecies cluster** | **Strain** | **Authority** | **Synonyms** | **Base pairs** | **Percent G+C** | **No. proteins** | **Bioproject accession** | **Biosample accession** | **Assembly accession** |
| --- | --- | --- | --- | --- | --- | --- | --- | --- | --- | --- |
| **1** | **1** | ***Rhodococcus aetherivorans*** | DSM 44752 | *Rhodococcus aetherivorans* | 64,25,690 | 70.3 | 5,798 | PRJNA607633 | SAMN14142455 | GCA_011058165 |
| **1** | **1** | ***Rhodococcus aetherivorans*** | JCM 14343 | *Rhodococcus aetherivorans* | 63,81,318 | 70.3 | 5,988 | PRJDB8788 | SAMD00186790 | GCA_009176285 |
| **2** | **0** | ***Rhodococcus zopfii*** | NBRC 100606 | *Rhodococcus zopfii* | 62,97,215 | 68.2 | 5,885 | PRJDB309 | SAMD00046765 | GCA_001895025 |
| **3** | **2** | *Rhodococcus rhodochrous* | NCTC10210 | *Rhodococcus rhodochrous; Staphylococcus rhodochrous* | 52,74,756 | 68.2 | 4,815 | PRJEB6403 | SAMEA4535765 | GCA_900187265 |
| **4** | **3** | *Rhodococcus agglutinans* | CCTCC AB2014297 | *Prescottella agglutinans; Rhodococcus agglutinans* | 54,19,727 | 69.3 | 4,862 | PRJNA504549 | SAMN10395197 | GCA_004011865 |
| **5** | **4** | *Rhodococcus sacchari* | Z13 | *Rhodococcus sacchari* | 45,32,339 | 69.8 | 4,095 | PRJNA224116 | SAMN31157772 | GCF_025837095 |
| **6** | **5** | *Rhodococcus phenolicus* | DSM 44812 | *Rhodococcus phenolicus* | 62,83,557 | 68.4 | 5,932 | PRJNA224116 | SAMN04357313 | GCF_001646785 |
| **7** | **6** | *Rhodococcus ruber* | DSM 43338 | *Rhodococcus ruber; Streptothrix rubra* | 53,03,098 | 70.7 | 4,897 | PRJNA224116 | SAMN04357318 | GCF_001646835 |
| **7** | **6** | *Rhodococcus electrodiphilus* | LMG 29881 | *Rhodococcus electrodiphilus* | 54,78,764 | 70.5 | 5,064 | PRJNA610628 | SAMN35798641 | GCA_030509825 |
| **7** | **6** | *Rhodococcus ruber* | NBRC 15591 | *Rhodococcus ruber; Streptothrix rubra* | 53,27,597 | 70.7 | 4,891 | PRJDB304 | SAMD00046777 | GCA_001894945 |
| **8** | **7** | *Rhodococcus yananensis* | FBM22-1T | *Rhodococcus yananensis* | 42,32,636 | 68.7 | 3,839 | PRJNA224116 | SAMN21894551 | GCF_020515525 |
| **9** | **8** | *Rhodococcus indonesiensis* | CSLK01-03 | *Rhodococcus indonesiensis* | 54,79,544 | 70.2 | 5,096 | PRJNA610628 | SAMN35785859 | GCA_030360185 |
| **9** | **8** | SARSHI1 | — | — | 56,95,289 | 70.1 | 5,170 | — | — | — |
