# Supplementary material for: Whole Genome of Petroleum Hydrocarbon Degrading Rhodococcus indonesiensis isolated from Nacharam, Hyderabad, India
Source: Research Square preprint supplement (doi:10.21203/rs.3.rs-6309542/v1), 2025-09-26
Supplement: Supplementary file 2 [file 2e64e70fdad8076fcf07c864.xlsx]

## Sheet: Sheet1
gene	fasta	rank	ko_id	kegg_hit	peptidase_id	peptidase_family	peptidase_hit	peptidase_RBH	peptidase_identity	peptidase_bitScore	peptidase_eVal	pfam_hits	cazy_ids	cazy_hits	cazy_subfam_ec	cazy_best_hit	heme_regulatory_motif_count
ENBDON_00001_gene	SARSHI1M.gff3_genome	C	K02313	chromosomal replication initiator protein								Bacterial dnaA protein [PF00308.21]; Bacterial dnaA protein helix-turn-helix [PF08299.14]; IstB-like ATP binding protein [PF01695.20]					0
ENBDON_00002_gene	SARSHI1M.gff3_genome	C	K02338	DNA polymerase III subunit beta [EC:2.7.7.7]								DNA polymerase III beta subunit, N-terminal domain [PF00712.22]; DNA polymerase III beta subunit, C-terminal domain [PF02768.18]; DNA polymerase III beta subunit, central domain [PF02767.19]					0
ENBDON_00003_gene	SARSHI1M.gff3_genome	C	K03629	DNA replication and repair protein RecF								RecF/RecN/SMC N terminal domain [PF02463.22]; AAA domain [PF13476.9]					0
ENBDON_00004_gene	SARSHI1M.gff3_genome	D										Dna[CI] antecedent, DciA [PF05258.15]					0
ENBDON_00005_gene	SARSHI1M.gff3_genome	C	K07044	uncharacterized protein								Predicted metal-dependent hydrolase [PF10118.12]					0
ENBDON_00006_gene	SARSHI1M.gff3_genome	D										Oxidoreductase FAD-binding domain [PF00970.27]; Oxidoreductase NAD-binding domain [PF00175.24]; 2Fe-2S iron-sulfur cluster binding domain [PF00111.30]					0
ENBDON_00007_gene	SARSHI1M.gff3_genome	D			MER0173937	S33	MER0173937 - family S33 non-peptidase homologues (Rhodococcus opacus) [S33.UNW]#S33#{peptidase unit: 27-306}~source BAH51737~	TRUE	0.734	419	6.908e-131	alpha/beta hydrolase fold [PF00561.23]; Serine aminopeptidase, S33 [PF12146.11]; Alpha/beta hydrolase family [PF12697.10]					0
ENBDON_00008_gene	SARSHI1M.gff3_genome	C	K02470	DNA gyrase subunit B [EC:5.6.2.2]								DNA gyrase B [PF00204.28]; DNA gyrase B subunit, carboxyl terminus [PF00986.24]; Histidine kinase-, DNA gyrase B-, and HSP90-like ATPase [PF02518.29]; Toprim domain [PF01751.25]					0
ENBDON_00009_gene	SARSHI1M.gff3_genome	C	K07131	uncharacterized protein								Roadblock/LC7 domain [PF03259.20]					0
ENBDON_00010_gene	SARSHI1M.gff3_genome	D										Protein of unknown function (DUF742) [PF05331.14]					0
ENBDON_00011_gene	SARSHI1M.gff3_genome	C	K06945	uncharacterized protein								Conserved hypothetical ATP binding protein [PF03029.20]; Ras family [PF00071.25]; Elongation factor Tu GTP binding domain [PF00009.30]					0
ENBDON_00012_gene	SARSHI1M.gff3_genome	E															0
ENBDON_00013_gene	SARSHI1M.gff3_genome	D										Bacterial signalling protein N terminal repeat [PF03707.19]					0
ENBDON_00014_gene	SARSHI1M.gff3_genome	C	K02469	DNA gyrase subunit A [EC:5.6.2.2]	MER0223936	N10	MER0223936 - family N10 unassigned peptide lyases (Mycobacterium vanbaalenii) [N10.UPW]#N10#{peptidase unit: 131-552}~source ABM10858~	TRUE	0.657	557	3.986e-164	DNA gyrase/topoisomerase IV, subunit A [PF00521.23]; Intein splicing domain [PF14890.9]; LAGLIDADG-like domain [PF14528.9]; DNA gyrase C-terminal domain, beta-propeller [PF03989.16]					0
ENBDON_00015_gene	SARSHI1M.gff3_genome	D										Transmembrane domain of unknown function (DUF3566) [PF12089.11]					0
ENBDON_00017_gene	SARSHI1M.gff3_genome	E															0
ENBDON_00019_gene	SARSHI1M.gff3_genome	D										MarR family [PF12802.10]; Winged helix DNA-binding domain [PF13463.9]					0
ENBDON_00020_gene	SARSHI1M.gff3_genome	D			MER0035477	C56	MER0035477 - family C56 non-peptidase homologues (Kribbella flavida) [C56.UNW]#C56#{peptidase unit: 41-154}~source GEBA2500423421~	FALSE	0.706	164	1.504e-44	DJ-1/PfpI family [PF01965.27]					0
ENBDON_00021_gene	SARSHI1M.gff3_genome	E															0
ENBDON_00022_gene	SARSHI1M.gff3_genome	C	K09796	periplasmic copper chaperone A								Copper chaperone PCu(A)C [PF04314.16]					0
ENBDON_00023_gene	SARSHI1M.gff3_genome	C	K15733	dye decolorizing peroxidase [EC:1.11.1.19]								Dyp-type peroxidase family [PF04261.15]					0
ENBDON_00024_gene	SARSHI1M.gff3_genome	D										Ribonucleotide reductase, small chain [PF00268.24]					0
ENBDON_00025_gene	SARSHI1M.gff3_genome	E															0
ENBDON_00026_gene	SARSHI1M.gff3_genome	E															0
ENBDON_00027_gene	SARSHI1M.gff3_genome	D										Secretory lipase [PF03583.17]; Serine aminopeptidase, S33 [PF12146.11]; Prolyl oligopeptidase family [PF00326.24]					0
ENBDON_00028_gene	SARSHI1M.gff3_genome	D										Acyl-CoA dehydrogenase, C-terminal domain [PF00441.27]; Acyl-CoA dehydrogenase, middle domain [PF02770.22]; Acyl-CoA dehydrogenase, N-terminal domain [PF02771.19]					0
ENBDON_00029_gene	SARSHI1M.gff3_genome	E															0
ENBDON_00030_gene	SARSHI1M.gff3_genome	E															0
ENBDON_00031_gene	SARSHI1M.gff3_genome	C	K03767	peptidyl-prolyl cis-trans isomerase A (cyclophilin A) [EC:5.2.1.8]								Cyclophilin type peptidyl-prolyl cis-trans isomerase/CLD [PF00160.24]					0
ENBDON_00032_gene	SARSHI1M.gff3_genome	C	K19225	rhomboid protease GluP [EC:3.4.21.105]	MER0173939	S54	MER0173939 - At1g25290 ({Arabidopsis thaliana}) (Rhodococcus opacus) [S54.A08]#S54#{peptidase unit: 82-300}~source BAH51753~	FALSE	0.643	281	4.465e-83	Rhomboid family [PF01694.25]					0
ENBDON_00033_gene	SARSHI1M.gff3_genome	D										Bacterial PH domain [PF10756.12]					0
ENBDON_00034_gene	SARSHI1M.gff3_genome	D										Cell division protein CrgA [PF06781.15]					0
ENBDON_00035_gene	SARSHI1M.gff3_genome	D										Bacterial protein of unknown function (DUF881) [PF05949.15]					0
ENBDON_00036_gene	SARSHI1M.gff3_genome	C	K01664	para-aminobenzoate synthetase component II [EC:2.6.1.85]	MER0436667	C26	MER0436667 - TRP3 protein (Rhodococcus imtechensis) [C26.959]#C26#{peptidase unit: 3-202}~source ZP_10007994~	FALSE	0.826	341	1.528e-105	Glutamine amidotransferase class-I [PF00117.31]; Peptidase C26 [PF07722.16]					0
ENBDON_00037_gene	SARSHI1M.gff3_genome	C	K12132	eukaryotic-like serine/threonine-protein kinase [EC:2.7.11.1]								Protein kinase domain [PF00069.28]; Protein tyrosine and serine/threonine kinase [PF07714.20]; Kinase-like [PF14531.9]; PASTA domain [PF03793.22]; ABC1 atypical kinase-like domain [PF03109.19]; Fungal protein kinase [PF17667.4]; Lipopolysaccharide kinase (Kdo/WaaP) family [PF06293.17]					0
ENBDON_00038_gene	SARSHI1M.gff3_genome	C	K12132	eukaryotic-like serine/threonine-protein kinase [EC:2.7.11.1]								Protein kinase domain [PF00069.28]; Protein tyrosine and serine/threonine kinase [PF07714.20]; Fungal protein kinase [PF17667.4]; Kinase-like [PF14531.9]; Lipopolysaccharide kinase (Kdo/WaaP) family [PF06293.17]; ABC1 atypical kinase-like domain [PF03109.19]; Lipopolysaccharide core biosynthesis protein (WaaY) [PF06176.14]					0
ENBDON_00039_gene	SARSHI1M.gff3_genome	C	K05364	penicillin-binding protein A								Penicillin binding protein transpeptidase domain [PF00905.25]					0
ENBDON_00040_gene	SARSHI1M.gff3_genome	D										Cell cycle protein [PF01098.22]					0
ENBDON_00041_gene	SARSHI1M.gff3_genome	C	K20074	PPM family protein phosphatase [EC:3.1.3.16]								Protein phosphatase 2C [PF13672.9]; Protein phosphatase 2C [PF00481.24]					0
ENBDON_00042_gene	SARSHI1M.gff3_genome	D										Inner membrane component of T3SS, cytoplasmic domain [PF16697.8]; FHA domain [PF00498.29]					0
ENBDON_00043_gene	SARSHI1M.gff3_genome	D										FhaA, N-terminal domain [PF12401.11]; Inner membrane component of T3SS, cytoplasmic domain [PF16697.8]; FHA domain [PF00498.29]					0
ENBDON_00045_gene	SARSHI1M.gff3_genome	E															0
ENBDON_00046_gene	SARSHI1M.gff3_genome	D										Thiamine pyrophosphate enzyme, N-terminal TPP binding domain [PF02776.21]; Thiamine pyrophosphate enzyme, C-terminal TPP binding domain [PF02775.24]; Thiamine pyrophosphate enzyme, central domain [PF00205.25]					0
ENBDON_00047_gene	SARSHI1M.gff3_genome	D										FAD binding domain [PF01494.22]; NAD(P)-binding Rossmann-like domain [PF13450.9]					0
ENBDON_00048_gene	SARSHI1M.gff3_genome	D										Tetracyclin repressor-like, C-terminal domain [PF17940.4]					0
ENBDON_00049_gene	SARSHI1M.gff3_genome	C	K00265	glutamate synthase (NADPH) large chain [EC:1.4.1.13]	MER0460042	C44	MER0460042 - glutamate synthase (NADPH) large chain (Rhodococcus pyridinivorans) [C44.003]#C44#{peptidase unit: 20-398}~source ZP_09310435~	TRUE	0.891	705	1.313e-210	Glutamine amidotransferases class-II [PF00310.24]; Glutamate synthase central domain [PF04898.17]; Conserved region in glutamate synthase [PF01645.20]; GXGXG motif [PF01493.22]					0
ENBDON_00050_gene	SARSHI1M.gff3_genome	C	K00266	glutamate synthase (NADPH) small chain [EC:1.4.1.13]								Dihydroprymidine dehydrogenase domain II, 4Fe-4S cluster [PF14691.9]; Pyridine nucleotide-disulphide oxidoreductase [PF07992.17]; Flavin-binding monooxygenase-like [PF00743.22]; NAD(P)-binding Rossmann-like domain [PF13450.9]; HI0933-like protein [PF03486.17]; FAD binding domain [PF01494.22]; Pyridine nucleotide-disulphide oxidoreductase [PF00070.30]; Flavin containing amine oxidoreductase [PF015…					0
ENBDON_00051_gene	SARSHI1M.gff3_genome	E															0
ENBDON_00052_gene	SARSHI1M.gff3_genome	D										Cutinase [PF01083.25]; PE-PPE domain [PF08237.14]	CE5	CE5 acetyl xylan esterase (EC 3.1.1.72); cutinase (EC 3.1.1.74)	3.1.1.3,3.1.1.72,3.1.1.74	CE5.hmm	0
ENBDON_00053_gene	SARSHI1M.gff3_genome	D										2-thiouracil desulfurase [PF04463.15]					0
ENBDON_00054_gene	SARSHI1M.gff3_genome	D										short chain dehydrogenase [PF00106.28]; Enoyl-(Acyl carrier protein) reductase [PF13561.9]; KR domain [PF08659.13]					0
ENBDON_00055_gene	SARSHI1M.gff3_genome	D										Antibiotic biosynthesis monooxygenase [PF03992.19]					0
ENBDON_00056_gene	SARSHI1M.gff3_genome	E															0
ENBDON_00057_gene	SARSHI1M.gff3_genome	E															0
ENBDON_00058_gene	SARSHI1M.gff3_genome	D										Histidine phosphatase superfamily (branch 1) [PF00300.25]					0
ENBDON_00059_gene	SARSHI1M.gff3_genome	C	K04567	lysyl-tRNA synthetase, class II [EC:6.1.1.6]								tRNA synthetases class II (D, K and N) [PF00152.23]; Phosphatidylglycerol lysyltransferase, C-terminal [PF09924.12]; Transmembrane region of lysyl-tRNA synthetase [PF16995.8]; OB-fold nucleic acid binding domain [PF01336.28]					0
ENBDON_00060_gene	SARSHI1M.gff3_genome	D										Predicted membrane protein (DUF2254) [PF10011.12]					0
ENBDON_00061_gene	SARSHI1M.gff3_genome	D										Sigma 54 modulation protein / S30EA ribosomal protein [PF02482.22]					0
ENBDON_00062_gene	SARSHI1M.gff3_genome	C	K06994	putative drug exporter of the RND superfamily								MMPL family [PF03176.18]					0
ENBDON_00063_gene	SARSHI1M.gff3_genome	D										Winged helix DNA-binding domain [PF13463.9]; MarR family [PF01047.25]; MarR family [PF12802.10]; HxlR-like helix-turn-helix [PF01638.20]					0
ENBDON_00064_gene	SARSHI1M.gff3_genome	D										Anti-sigma-K factor rskA [PF10099.12]					0
ENBDON_00065_gene	SARSHI1M.gff3_genome	C	K03088	RNA polymerase sigma-70 factor, ECF subfamily								ECF sigma factor [PF07638.14]; Sigma-70 region 2 [PF04542.17]; Sigma-70, region 4 [PF04545.19]; Sigma-70, region 4 [PF08281.15]					0
ENBDON_00066_gene	SARSHI1M.gff3_genome	D			MER0209053	S09X	MER0209053 - family S9 unassigned peptidases (Rhodococcus opacus) [S09.UPW]#S09X#{peptidase unit: 91-176}~source YP_002779475~	FALSE	0.657	115	1.923e-27	Alpha/beta hydrolase domain [PF20408.1]; Dienelactone hydrolase family [PF01738.21]; Phospholipase/Carboxylesterase [PF02230.19]; Prolyl oligopeptidase family [PF00326.24]; Alpha/beta hydrolase family [PF12695.10]; Serine aminopeptidase, S33 [PF12146.11]; Serine hydrolase [PF06821.16]; Platelet-activating factor acetylhydrolase, isoform II [PF03403.16]; Alpha/beta hydrolase family [PF12697.10]					0
ENBDON_00067_gene	SARSHI1M.gff3_genome	D										Fasciclin domain [PF02469.25]					0
ENBDON_00068_gene	SARSHI1M.gff3_genome	C	K03098	apolipoprotein D and lipocalin family protein								Lipocalin-like domain [PF08212.15]					0
ENBDON_00069_gene	SARSHI1M.gff3_genome	C	K02168	choline/glycine/proline betaine transport protein								BCCT, betaine/carnitine/choline family transporter [PF02028.20]					0
ENBDON_00070_gene	SARSHI1M.gff3_genome	D										Protein of unknown function (DUF2867) [PF11066.11]; NmrA-like family [PF05368.16]; NAD(P)H-binding [PF13460.9]; NAD dependent epimerase/dehydratase family [PF01370.24]; 3-beta hydroxysteroid dehydrogenase/isomerase family [PF01073.22]; RmlD substrate binding domain [PF04321.20]; GDP-mannose 4,6 dehydratase [PF16363.8]					0
ENBDON_00071_gene	SARSHI1M.gff3_genome	C	K07071	uncharacterized protein								NAD dependent epimerase/dehydratase family [PF01370.24]; GDP-mannose 4,6 dehydratase [PF16363.8]; RmlD substrate binding domain [PF04321.20]; Domain of unknown function (DUF1731) [PF08338.14]; Polyketide cyclase / dehydrase and lipid transport [PF10604.12]					0
ENBDON_00072_gene	SARSHI1M.gff3_genome	E															0
ENBDON_00073_gene	SARSHI1M.gff3_genome	C	K01669	deoxyribodipyrimidine photo-lyase [EC:4.1.99.3]								FAD binding domain of DNA photolyase [PF03441.17]; DNA photolyase [PF00875.21]					0
ENBDON_00074_gene	SARSHI1M.gff3_genome	C	K14761	ribosome-associated protein								S4 domain [PF13275.9]					0
ENBDON_00075_gene	SARSHI1M.gff3_genome	C	K03893	arsenical pump membrane protein								Arsenical pump membrane protein [PF02040.18]					0
ENBDON_00076_gene	SARSHI1M.gff3_genome	E															0
ENBDON_00077_gene	SARSHI1M.gff3_genome	E															0
ENBDON_00078_gene	SARSHI1M.gff3_genome	D										Thioesterase-like superfamily [PF13279.9]					0
ENBDON_00079_gene	SARSHI1M.gff3_genome	C	K02553	regulator of ribonuclease activity A								Aldolase/RraA [PF03737.18]					0
ENBDON_00080_gene	SARSHI1M.gff3_genome	C	K05799	GntR family transcriptional regulator, transcriptional repressor for pyruvate dehydrogenase complex								Bacterial regulatory proteins, gntR family [PF00392.24]; FCD domain [PF07729.15]					0
ENBDON_00081_gene	SARSHI1M.gff3_genome	D										Family of unknown function (DUF5313) [PF17240.5]					0
ENBDON_00082_gene	SARSHI1M.gff3_genome	C	K01897	long-chain acyl-CoA synthetase [EC:6.2.1.3]								AMP-binding enzyme [PF00501.31]					0
ENBDON_00083_gene	SARSHI1M.gff3_genome	E															0
ENBDON_00084_gene	SARSHI1M.gff3_genome	D										Phage integrase family [PF00589.25]					0
ENBDON_00085_gene	SARSHI1M.gff3_genome	E															0
ENBDON_00086_gene	SARSHI1M.gff3_genome	E															0
ENBDON_00087_gene	SARSHI1M.gff3_genome	E															0
ENBDON_00088_gene	SARSHI1M.gff3_genome	D										Helix-turn-helix domain [PF12728.10]					0
ENBDON_00089_gene	SARSHI1M.gff3_genome	D										PIN domain [PF13470.9]					0
ENBDON_00090_gene	SARSHI1M.gff3_genome	C	K07492	putative transposase								Putative transposase of IS4/5 family (DUF4096) [PF13340.9]					0
ENBDON_00091_gene	SARSHI1M.gff3_genome	C	K07492	putative transposase								Transposase DDE domain [PF13586.9]; Transposase DDE domain [PF01609.24]; Transposase DDE domain [PF13612.9]					0
ENBDON_00092_gene	SARSHI1M.gff3_genome	D										short chain dehydrogenase [PF00106.28]; Enoyl-(Acyl carrier protein) reductase [PF13561.9]; KR domain [PF08659.13]					0
ENBDON_00093_gene	SARSHI1M.gff3_genome	D										Alcohol dehydrogenase GroES-like domain [PF08240.15]; Zinc-binding dehydrogenase [PF00107.29]; Zinc-binding dehydrogenase [PF13602.9]					0
ENBDON_00094_gene	SARSHI1M.gff3_genome	D			MER1006414	S12	MER1006414 - family S12 unassigned peptidases (Rhodococcus triatomae) [S12.UPW]#S12#{peptidase unit: 15-366}~source M2VXN3~	TRUE	0.83	604	1.621e-193	Beta-lactamase [PF00144.27]					0
ENBDON_00095_gene	SARSHI1M.gff3_genome	C	K00485	dimethylaniline monooxygenase (N-oxide forming) / hypotaurine monooxygenase [EC:1.14.13.8 1.8.1.-]								Flavin-binding monooxygenase-like [PF00743.22]; L-lysine 6-monooxygenase/L-ornithine 5-monooxygenase [PF13434.9]; Pyridine nucleotide-disulphide oxidoreductase [PF07992.17]; FAD-NAD(P)-binding [PF13454.9]; NAD(P)-binding Rossmann-like domain [PF13450.9]					0
ENBDON_00096_gene	SARSHI1M.gff3_genome	D										Bacterial regulatory proteins, tetR family [PF00440.26]					0
ENBDON_00097_gene	SARSHI1M.gff3_genome	C	K07492	putative transposase								Transposase DDE domain [PF13586.9]; Transposase DDE domain [PF13612.9]					0
ENBDON_00098_gene	SARSHI1M.gff3_genome	C	K16051	3-oxo-5alpha-steroid 4-dehydrogenase [EC:1.3.99.5]								FAD binding domain [PF00890.27]; FAD dependent oxidoreductase [PF12831.10]; FAD dependent oxidoreductase [PF01266.27]					0
ENBDON_00099_gene	SARSHI1M.gff3_genome	D										Glyoxalase/Bleomycin resistance protein/Dioxygenase superfamily [PF00903.28]					0
ENBDON_00100_gene	SARSHI1M.gff3_genome	E															0
ENBDON_00101_gene	SARSHI1M.gff3_genome	C	K07492	putative transposase								Transposase DDE domain [PF13586.9]; Transposase DDE domain [PF01609.24]; Transposase DDE domain [PF13612.9]					0
ENBDON_00102_gene	SARSHI1M.gff3_genome	C	K07492	putative transposase								Putative transposase of IS4/5 family (DUF4096) [PF13340.9]					0
ENBDON_00103_gene	SARSHI1M.gff3_genome	C	K03119	taurine dioxygenase [EC:1.14.11.17]								Taurine catabolism dioxygenase TauD, TfdA family [PF02668.19]					0
ENBDON_00104_gene	SARSHI1M.gff3_genome	D										Fungal trichothecene efflux pump (TRI12) [PF06609.16]; Major Facilitator Superfamily [PF07690.19]; Sugar (and other) transporter [PF00083.27]					0
ENBDON_00105_gene	SARSHI1M.gff3_genome	D										Nitroreductase family [PF00881.27]					0
ENBDON_00106_gene	SARSHI1M.gff3_genome	C	K18688	3-oxocholest-4-en-26-oate---CoA ligase [EC:6.2.1.42]								AMP-binding enzyme [PF00501.31]; AMP-binding enzyme C-terminal domain [PF13193.9]					0
ENBDON_00107_gene	SARSHI1M.gff3_genome	D			MER1072349	S49C	MER1072349 - subfamily S49C non-peptidase homologues (Thermus scotoductus) [S49.UNC]#S49C#{peptidase unit: 84-201}~source E8PNH8~	FALSE	0.413	79	8.194e-15	Enoyl-CoA hydratase/isomerase [PF00378.23]; Enoyl-CoA hydratase/isomerase [PF16113.8]					0
ENBDON_00108_gene	SARSHI1M.gff3_genome	D										Aldehyde dehydrogenase family [PF00171.25]					0
ENBDON_00109_gene	SARSHI1M.gff3_genome	D										Thiolase, N-terminal domain [PF00108.26]; Thiolase, C-terminal domain [PF02803.21]; Beta-ketoacyl synthase, N-terminal domain [PF00109.29]					0
ENBDON_00110_gene	SARSHI1M.gff3_genome	E															0
ENBDON_00111_gene	SARSHI1M.gff3_genome	E															0
ENBDON_00112_gene	SARSHI1M.gff3_genome	E															0
ENBDON_00113_gene	SARSHI1M.gff3_genome	D										Domain of unknown function (DUF202) [PF02656.18]					0
ENBDON_00114_gene	SARSHI1M.gff3_genome	C	K00389	putative membrane protein								Domain of unknown function (DUF202) [PF02656.18]					0
ENBDON_00115_gene	SARSHI1M.gff3_genome	C	K07492	putative transposase								Transposase DDE domain [PF13586.9]; Transposase DDE domain [PF01609.24]; Transposase DDE domain [PF13612.9]					0
ENBDON_00116_gene	SARSHI1M.gff3_genome	C	K07492	putative transposase								Putative transposase of IS4/5 family (DUF4096) [PF13340.9]					0
ENBDON_00117_gene	SARSHI1M.gff3_genome	D										Aldehyde dehydrogenase family [PF00171.25]					0
ENBDON_00118_gene	SARSHI1M.gff3_genome	D										Cytochrome P450 [PF00067.25]					0
ENBDON_00119_gene	SARSHI1M.gff3_genome	C	K05337	ferredoxin								4Fe-4S single cluster domain of Ferredoxin I [PF13370.9]; 4Fe-4S single cluster domain [PF13459.9]					0
ENBDON_00120_gene	SARSHI1M.gff3_genome	D										2Fe-2S iron-sulfur cluster binding domain [PF00111.30]					1
ENBDON_00121_gene	SARSHI1M.gff3_genome	C	K00529	3-phenylpropionate/trans-cinnamate dioxygenase ferredoxin reductase component [EC:1.18.1.3]								Pyridine nucleotide-disulphide oxidoreductase [PF07992.17]; Reductase C-terminal [PF14759.9]; Pyridine nucleotide-disulphide oxidoreductase [PF00070.30]					0
ENBDON_00122_gene	SARSHI1M.gff3_genome	D										Sulfite exporter TauE/SafE [PF01925.22]					0
ENBDON_00123_gene	SARSHI1M.gff3_genome	E															0
ENBDON_00124_gene	SARSHI1M.gff3_genome	D										Bacterial regulatory proteins, tetR family [PF00440.26]					0
ENBDON_00125_gene	SARSHI1M.gff3_genome	D										CoA-transferase family III [PF02515.20]					0
ENBDON_00126_gene	SARSHI1M.gff3_genome	D										Zinc-binding dehydrogenase [PF00107.29]; Alcohol dehydrogenase GroES-like domain [PF08240.15]; Glucose dehydrogenase C-terminus [PF16912.8]; Zinc-binding dehydrogenase [PF13602.9]					0
ENBDON_00127_gene	SARSHI1M.gff3_genome	D										Major Facilitator Superfamily [PF07690.19]; Sugar (and other) transporter [PF00083.27]					0
ENBDON_00128_gene	SARSHI1M.gff3_genome	D										ANTAR domain [PF03861.17]; GAF domain [PF13492.9]					0
ENBDON_00129_gene	SARSHI1M.gff3_genome	E															0
ENBDON_00130_gene	SARSHI1M.gff3_genome	D										Helix-turn-helix domain [PF12833.10]; ANTAR domain [PF03861.17]					0
ENBDON_00131_gene	SARSHI1M.gff3_genome	E															0
ENBDON_00132_gene	SARSHI1M.gff3_genome	D										Bacterial regulatory proteins, tetR family [PF00440.26]					0
ENBDON_00133_gene	SARSHI1M.gff3_genome	D										Hsp70 protein [PF00012.23]					0
ENBDON_00134_gene	SARSHI1M.gff3_genome	E															0
ENBDON_00135_gene	SARSHI1M.gff3_genome	C	K03833	selenocysteine-specific elongation factor								Elongation factor Tu GTP binding domain [PF00009.30]; Elongation factor SelB, winged helix [PF09107.14]					0
ENBDON_00136_gene	SARSHI1M.gff3_genome	C	K01042	L-seryl-tRNA(Ser) seleniumtransferase [EC:2.9.1.1]								L-seryl-tRNA selenium transferase [PF03841.16]; Selenocysteine synthase N terminal [PF12390.11]; Aminotransferase class-V [PF00266.22]					0
ENBDON_00138_gene	SARSHI1M.gff3_genome	C	K01008	selenide, water dikinase [EC:2.7.9.3]								AIR synthase related protein, N-terminal domain [PF00586.27]; AIR synthase related protein, C-terminal domain [PF02769.25]					0
ENBDON_00139_gene	SARSHI1M.gff3_genome	D										Molybdopterin oxidoreductase Fe4S4 domain [PF04879.19]					0
ENBDON_00140_gene	SARSHI1M.gff3_genome	D										Molybdopterin oxidoreductase [PF00384.25]; Molydopterin dinucleotide binding domain [PF01568.24]					0
ENBDON_00141_gene	SARSHI1M.gff3_genome	C	K00124	formate dehydrogenase iron-sulfur subunit								4Fe-4S dicluster domain [PF13247.9]; 4Fe-4S dicluster domain [PF12838.10]; 4Fe-4S dicluster domain [PF13187.9]; 4Fe-4S dicluster domain [PF14697.9]; 4Fe-4S double cluster binding domain [PF13484.9]; 4Fe-4S dicluster domain [PF13183.9]					0
ENBDON_00142_gene	SARSHI1M.gff3_genome	D										Polysulfide reductase [PF14589.9]; Polysulphide reductase, NrfD [PF03916.17]					0
ENBDON_00143_gene	SARSHI1M.gff3_genome	C	K08177	MFS transporter, OFA family, oxalate/formate antiporter								Nodulin-like [PF06813.16]					0
ENBDON_00144_gene	SARSHI1M.gff3_genome	D										Helix-turn-helix domain [PF12844.10]; Helix-turn-helix [PF01381.25]; Mannose-6-phosphate isomerase [PF01050.21]; Cupin [PF00190.25]; Helix-turn-helix domain [PF13560.9]; Cro/C1-type HTH DNA-binding domain [PF13443.9]; AraC-like ligand binding domain [PF02311.22]					0
ENBDON_00145_gene	SARSHI1M.gff3_genome	D										Pyridine nucleotide-disulphide oxidoreductase [PF07992.17]; Tellurite resistance protein TehB [PF03848.17]; Thiopurine S-methyltransferase (TPMT) [PF05724.14]; Methyltransferase domain [PF13489.9]; Methyltransferase domain [PF13649.9]; HI0933-like protein [PF03486.17]; Nodulation protein S (NodS) [PF05401.14]; Mycolic acid cyclopropane synthetase [PF02353.23]; Methyltransferase domain [PF08241.15…					1
ENBDON_00146_gene	SARSHI1M.gff3_genome	D										AAA domain [PF13086.9]; AAA domain [PF13087.9]; REase_MTES_1575 [PF18741.4]; AAA domain [PF13604.9]; Protein of unknown function (DUF559) [PF04480.15]					0
ENBDON_00147_gene	SARSHI1M.gff3_genome	D			MER0131852	S09X	MER0131852 - family S9 unassigned peptidases (Nocardiopsis dassonvillei) [S09.UPW]#S09X#{peptidase unit: 165-420}~source GEBA2500398620~	FALSE	0.414	186	6.921e-49	BD-FAE [PF20434.1]; alpha/beta hydrolase fold [PF07859.16]; Prolyl oligopeptidase family [PF00326.24]; Dienelactone hydrolase family [PF01738.21]; Serine aminopeptidase, S33 [PF12146.11]; Acetyl xylan esterase (AXE1) [PF05448.15]; Esterase FrsA-like [PF06500.14]; Carboxylesterase family [PF00135.31]; Chlorophyllase enzyme [PF12740.10]; BAAT / Acyl-CoA thioester hydrolase C terminal [PF08840.14]; …					0
ENBDON_00148_gene	SARSHI1M.gff3_genome	D										Fungal fucose-specific lectin [PF07938.15]					0
ENBDON_00149_gene	SARSHI1M.gff3_genome	D										Aldehyde dehydrogenase family [PF00171.25]; Acyl-CoA reductase (LuxC) [PF05893.17]					0
ENBDON_00150_gene	SARSHI1M.gff3_genome	D										Diguanylate cyclase, GGDEF domain [PF00990.24]; Cation efflux system protein CusB domain 1 [PF00529.23]; PAS fold [PF00989.28]					0
ENBDON_00151_gene	SARSHI1M.gff3_genome	D										Bacterial capsule synthesis protein PGA_cap [PF09587.13]					0
ENBDON_00152_gene	SARSHI1M.gff3_genome	D										Domain of unknown function (DUF427) [PF04248.15]					0
ENBDON_00153_gene	SARSHI1M.gff3_genome	D										Flavin-binding monooxygenase-like [PF00743.22]; L-lysine 6-monooxygenase/L-ornithine 5-monooxygenase [PF13434.9]; Pyridine nucleotide-disulphide oxidoreductase [PF07992.17]; NAD(P)-binding Rossmann-like domain [PF13450.9]; FAD binding domain [PF01494.22]; FAD binding domain [PF00890.27]					0
ENBDON_00154_gene	SARSHI1M.gff3_genome	D										Bacterial regulatory proteins, tetR family [PF00440.26]					0
ENBDON_00155_gene	SARSHI1M.gff3_genome	D										Domain of Unknown Function (DUF1540) [PF07561.14]					0
ENBDON_00156_gene	SARSHI1M.gff3_genome	D										Fungal trichothecene efflux pump (TRI12) [PF06609.16]; Major Facilitator Superfamily [PF07690.19]; Sugar (and other) transporter [PF00083.27]					0
ENBDON_00157_gene	SARSHI1M.gff3_genome	D										MarR family [PF01047.25]; MarR family [PF12802.10]; Winged helix DNA-binding domain [PF13463.9]					0
ENBDON_00158_gene	SARSHI1M.gff3_genome	D										Bacterial regulatory proteins, tetR family [PF00440.26]					0
ENBDON_00159_gene	SARSHI1M.gff3_genome	D										Carboxyl transferase domain [PF01039.25]; Carbamoyl-phosphate synthase L chain, ATP binding domain [PF02786.20]; Biotin carboxylase, N-terminal domain [PF00289.25]; Biotin carboxylase C-terminal domain [PF02785.22]; ATP-grasp domain [PF02655.17]; Biotin-requiring enzyme [PF00364.25]; RimK-like ATP-grasp domain [PF08443.14]					0
ENBDON_00160_gene	SARSHI1M.gff3_genome	C	K21929	uracil-DNA glycosylase [EC:3.2.2.27]								Uracil DNA glycosylase superfamily [PF03167.22]					0
ENBDON_00161_gene	SARSHI1M.gff3_genome	C	K08172	MFS transporter, MHS family, shikimate and dehydroshikimate transport protein	MER0011529	M20X	MER0011529 - family M20 unassigned peptidases (Campylobacter jejuni) [M20.UPW]#M20X#{peptidase unit: 1-415}~source Q9S3L1~	FALSE	0.333	135	1.046e-31	Sugar (and other) transporter [PF00083.27]; Major Facilitator Superfamily [PF07690.19]					0
ENBDON_00162_gene	SARSHI1M.gff3_genome	D										NAD dependent epimerase/dehydratase family [PF01370.24]; NAD(P)H-binding [PF13460.9]; NmrA-like family [PF05368.16]; 3-beta hydroxysteroid dehydrogenase/isomerase family [PF01073.22]					0
ENBDON_00163_gene	SARSHI1M.gff3_genome	D										Enoyl-(Acyl carrier protein) reductase [PF13561.9]; short chain dehydrogenase [PF00106.28]					0
ENBDON_00164_gene	SARSHI1M.gff3_genome	D										IclR helix-turn-helix domain [PF09339.13]					0
ENBDON_00165_gene	SARSHI1M.gff3_genome	D										Alpha/beta-hydrolase family [PF10081.12]; Alpha/beta-hydrolase family N-terminus [PF15420.9]					0
ENBDON_00166_gene	SARSHI1M.gff3_genome	E															0
ENBDON_00167_gene	SARSHI1M.gff3_genome	D										Protein of unknown function (DUF998) [PF06197.16]					0
ENBDON_00168_gene	SARSHI1M.gff3_genome	C	K02030	polar amino acid transport system substrate-binding protein								Bacterial extracellular solute-binding proteins, family 3 [PF00497.23]; Ligated ion channel L-glutamate- and glycine-binding site [PF10613.12]					0
ENBDON_00169_gene	SARSHI1M.gff3_genome	D										Copper resistance protein D [PF05425.16]					0
ENBDON_00170_gene	SARSHI1M.gff3_genome	C	K07156	copper resistance protein C								CopC domain [PF04234.15]					0
ENBDON_00171_gene	SARSHI1M.gff3_genome	E															0
ENBDON_00172_gene	SARSHI1M.gff3_genome	D										Family of unknown function (DUF6474) [PF20079.2]					0
ENBDON_00173_gene	SARSHI1M.gff3_genome	D										RNase_H superfamily [PF13482.9]					0
ENBDON_00174_gene	SARSHI1M.gff3_genome	C	K06889	uncharacterized protein	MER0173930	S09C	MER0173930 - subfamily S9C unassigned peptidases (Rhodococcus opacus) [S09.UPC]#S09C#{peptidase unit: 47-261}~source BAH51522~	FALSE	0.703	301	1.194e-90	Prolyl oligopeptidase family [PF00326.24]; Serine aminopeptidase, S33 [PF12146.11]; Alpha/beta hydrolase domain [PF20408.1]; Chlamydia CHLPS protein (DUF818) [PF05677.15]; Dienelactone hydrolase family [PF01738.21]; alpha/beta hydrolase fold [PF00561.23]; Esterase FrsA-like [PF06500.14]; Alpha/beta hydrolase family [PF12697.10]; Acetyl xylan esterase (AXE1) [PF05448.15]; X-Pro dipeptidyl-peptidas…					0
ENBDON_00175_gene	SARSHI1M.gff3_genome	C	K08683	3-hydroxyacyl-CoA dehydrogenase / 3-hydroxy-2-methylbutyryl-CoA dehydrogenase [EC:1.1.1.35 1.1.1.178]								Enoyl-(Acyl carrier protein) reductase [PF13561.9]; short chain dehydrogenase [PF00106.28]; KR domain [PF08659.13]; NAD dependent epimerase/dehydratase family [PF01370.24]; GDP-mannose 4,6 dehydratase [PF16363.8]					0
ENBDON_00176_gene	SARSHI1M.gff3_genome	C	K08217	MFS transporter, DHA3 family, macrolide efflux protein								Transmembrane secretion effector [PF05977.16]					0
ENBDON_00177_gene	SARSHI1M.gff3_genome	D										MarR family [PF01047.25]; Winged helix DNA-binding domain [PF13463.9]; MarR family [PF12802.10]					0
ENBDON_00178_gene	SARSHI1M.gff3_genome	C	K23541	Ca2+/H+ antiporter, TMEM165/GDT1 family								Uncharacterized protein family UPF0016 [PF01169.22]					0
ENBDON_00179_gene	SARSHI1M.gff3_genome	E															0
ENBDON_00180_gene	SARSHI1M.gff3_genome	C	K04564	superoxide dismutase, Fe-Mn family [EC:1.15.1.1]								Iron/manganese superoxide dismutases, C-terminal domain [PF02777.21]; Iron/manganese superoxide dismutases, alpha-hairpin domain [PF00081.25]					0
ENBDON_00181_gene	SARSHI1M.gff3_genome	C	K16568	exopolysaccharide production protein ExoZ								Acyltransferase family [PF01757.25]					0
ENBDON_00182_gene	SARSHI1M.gff3_genome	C	K07304	peptide-methionine (S)-S-oxide reductase [EC:1.8.4.11]								Peptide methionine sulfoxide reductase [PF01625.24]; Domain of unknown function (DUF4612) [PF15389.9]					0
ENBDON_00183_gene	SARSHI1M.gff3_genome	E															0
ENBDON_00184_gene	SARSHI1M.gff3_genome	D										Luciferase-like monooxygenase [PF00296.23]					0
ENBDON_00185_gene	SARSHI1M.gff3_genome	D										Rhodanese-like domain [PF00581.23]					0
ENBDON_00186_gene	SARSHI1M.gff3_genome	D										Domain of unknown function (DUF4328) [PF14219.9]					0
ENBDON_00187_gene	SARSHI1M.gff3_genome	C	K01126	glycerophosphoryl diester phosphodiesterase [EC:3.1.4.46]								Glycerophosphoryl diester phosphodiesterase family [PF03009.20]					0
ENBDON_00188_gene	SARSHI1M.gff3_genome	D										Family of unknown function (DUF5926) [PF19348.2]					0
ENBDON_00189_gene	SARSHI1M.gff3_genome	C	K01005	polyisoprenyl-teichoic acid--peptidoglycan teichoic acid transferase [EC:2.7.8.-]								LytR_cpsA_psr family [PF03816.17]					0
ENBDON_00190_gene	SARSHI1M.gff3_genome	C	K07052	CAAX protease family protein	MER0072600	M79	MER0072600 - family M79 unassigned peptidases (Rhodococcus jostii) [M79.UPW]#M79#{peptidase unit: 36-257}~source YP_703985~	FALSE	0.759	344	8.143e-106	Type II CAAX prenyl endopeptidase Rce1-like [PF02517.19]					0
ENBDON_00191_gene	SARSHI1M.gff3_genome	E															0
ENBDON_00192_gene	SARSHI1M.gff3_genome	C	K08282	non-specific serine/threonine protein kinase [EC:2.7.11.1]								Protein kinase domain [PF00069.28]; Protein tyrosine and serine/threonine kinase [PF07714.20]; Kelch motif [PF13964.9]; Kelch motif [PF01344.28]; Kinase-like [PF14531.9]; Fungal protein kinase [PF17667.4]; Kelch motif [PF07646.18]					0
ENBDON_00193_gene	SARSHI1M.gff3_genome	D										Domain of unknown function (DUF2470) [PF10615.12]					0
ENBDON_00194_gene	SARSHI1M.gff3_genome	E															0
ENBDON_00195_gene	SARSHI1M.gff3_genome	C	K04518	prephenate dehydratase [EC:4.2.1.51]								Prephenate dehydratase [PF00800.21]; ACT domain [PF01842.28]					0
ENBDON_00196_gene	SARSHI1M.gff3_genome	D										Histidine phosphatase superfamily (branch 1) [PF00300.25]					0
ENBDON_00197_gene	SARSHI1M.gff3_genome	C	K22108	TetR/AcrR family transcriptional regulator, cholesterol catabolism regulator								Tetracyclin repressor-like, C-terminal domain [PF17932.4]; Bacterial regulatory proteins, tetR family [PF00440.26]; YsiA-like protein, C-terminal region [PF08359.14]					0
ENBDON_00198_gene	SARSHI1M.gff3_genome	D			MER1071493	S49C	MER1071493 - subfamily S49C non-peptidase homologues (Rhodococcus ruber) [S49.UNC]#S49C#{peptidase unit: 82-190}~source M2Y5T1~	FALSE	0.436	77	5.048e-14	Enoyl-CoA hydratase/isomerase [PF00378.23]; Enoyl-CoA hydratase/isomerase [PF16113.8]					0
ENBDON_00199_gene	SARSHI1M.gff3_genome	C	K00344	NADPH:quinone reductase [EC:1.6.5.5]								Zinc-binding dehydrogenase [PF00107.29]; Zinc-binding dehydrogenase [PF13602.9]; Alcohol dehydrogenase GroES-like domain [PF08240.15]					0
ENBDON_00200_gene	SARSHI1M.gff3_genome	C	K01692	enoyl-CoA hydratase [EC:4.2.1.17]	MER1072352	S49C	MER1072352 - subfamily S49C non-peptidase homologues (Thermus thermophilus) [S49.UNC]#S49C#{peptidase unit: 85-201}~source P83702~	FALSE	0.489	99	1.797e-21	Enoyl-CoA hydratase/isomerase [PF00378.23]; Enoyl-CoA hydratase/isomerase [PF16113.8]					0
ENBDON_00201_gene	SARSHI1M.gff3_genome	C	K00632	acetyl-CoA acyltransferase [EC:2.3.1.16]								Thiolase, N-terminal domain [PF00108.26]; Thiolase, C-terminal domain [PF02803.21]					0
ENBDON_00202_gene	SARSHI1M.gff3_genome	C	K08683	3-hydroxyacyl-CoA dehydrogenase / 3-hydroxy-2-methylbutyryl-CoA dehydrogenase [EC:1.1.1.35 1.1.1.178]								Enoyl-(Acyl carrier protein) reductase [PF13561.9]; short chain dehydrogenase [PF00106.28]; KR domain [PF08659.13]; GDP-mannose 4,6 dehydratase [PF16363.8]; 3-beta hydroxysteroid dehydrogenase/isomerase family [PF01073.22]					0
ENBDON_00203_gene	SARSHI1M.gff3_genome	D										Tetracyclin repressor-like, C-terminal domain [PF17932.4]; Bacterial regulatory proteins, tetR family [PF00440.26]					0
ENBDON_00204_gene	SARSHI1M.gff3_genome	C	K00249	acyl-CoA dehydrogenase [EC:1.3.8.7]								Acyl-CoA dehydrogenase, C-terminal domain [PF00441.27]; Acyl-CoA dehydrogenase, middle domain [PF02770.22]; Acyl-CoA dehydrogenase, N-terminal domain [PF02771.19]					0
ENBDON_00205_gene	SARSHI1M.gff3_genome	D										Enoyl-(Acyl carrier protein) reductase [PF13561.9]; short chain dehydrogenase [PF00106.28]; KR domain [PF08659.13]					0
ENBDON_00206_gene	SARSHI1M.gff3_genome	D										Antibiotic biosynthesis monooxygenase [PF03992.19]					0
ENBDON_00207_gene	SARSHI1M.gff3_genome	E															1
ENBDON_00208_gene	SARSHI1M.gff3_genome	D										RimK-like ATP-grasp domain [PF08443.14]					0
ENBDON_00209_gene	SARSHI1M.gff3_genome	D										Nitroreductase family [PF00881.27]					0
ENBDON_00210_gene	SARSHI1M.gff3_genome	D										Transmembrane secretion effector [PF05977.16]; Major Facilitator Superfamily [PF07690.19]					0
ENBDON_00211_gene	SARSHI1M.gff3_genome	C	K00459	nitronate monooxygenase [EC:1.13.12.16]								Nitronate monooxygenase [PF03060.18]					0
ENBDON_00212_gene	SARSHI1M.gff3_genome	D										SnoaL-like domain [PF12680.10]					0
ENBDON_00213_gene	SARSHI1M.gff3_genome	C	K01692	enoyl-CoA hydratase [EC:4.2.1.17]								Enoyl-CoA hydratase/isomerase [PF00378.23]; Enoyl-CoA hydratase/isomerase [PF16113.8]					0
ENBDON_00214_gene	SARSHI1M.gff3_genome	D										Transcription factor WhiB [PF02467.19]					0
ENBDON_00215_gene	SARSHI1M.gff3_genome	C	K01692	enoyl-CoA hydratase [EC:4.2.1.17]	MER1073240	S49C	MER1073240 - subfamily S49C non-peptidase homologues (Acinetobacter bohemicus) [S49.UNC]#S49C#{peptidase unit: 84-212}~source N8Q6E4~	FALSE	0.48	75	1.467e-13	Enoyl-CoA hydratase/isomerase [PF00378.23]; Enoyl-CoA hydratase/isomerase [PF16113.8]					0
ENBDON_00216_gene	SARSHI1M.gff3_genome	D										Family of unknown function (DUF6325) [PF19850.2]					0
ENBDON_00217_gene	SARSHI1M.gff3_genome	E															0
ENBDON_00218_gene	SARSHI1M.gff3_genome	D										Ion channel [PF07885.19]					0
ENBDON_00219_gene	SARSHI1M.gff3_genome	D										Uncharacterized protein conserved in bacteria (DUF2252) [PF10009.12]					0
ENBDON_00220_gene	SARSHI1M.gff3_genome	E															0
ENBDON_00221_gene	SARSHI1M.gff3_genome	D										Family of unknown function (DUF6325) [PF19850.2]					0
ENBDON_00222_gene	SARSHI1M.gff3_genome	C	K24160	sodium/hydrogen antiporter								Sodium/hydrogen exchanger family [PF00999.24]					0
ENBDON_00223_gene	SARSHI1M.gff3_genome	D										Sulfatase [PF00884.26]					0
ENBDON_00224_gene	SARSHI1M.gff3_genome	E															0
ENBDON_00225_gene	SARSHI1M.gff3_genome	E															0
ENBDON_00226_gene	SARSHI1M.gff3_genome	E															0
ENBDON_00227_gene	SARSHI1M.gff3_genome	E															0
ENBDON_00228_gene	SARSHI1M.gff3_genome	E															0
ENBDON_00229_gene	SARSHI1M.gff3_genome	C	K07029	diacylglycerol kinase (ATP) [EC:2.7.1.107]								Diacylglycerol kinase catalytic domain [PF00781.27]; YegS C-terminal NAD kinase beta sandwich-like domain [PF19279.2]					0
ENBDON_00230_gene	SARSHI1M.gff3_genome	D										Major Facilitator Superfamily [PF07690.19]; Fungal trichothecene efflux pump (TRI12) [PF06609.16]					0
ENBDON_00231_gene	SARSHI1M.gff3_genome	C	K18802	glutamine amidotransferase	MER0151412	C44	MER0151412 - family C44 unassigned peptidases (Rhodococcus jostii) [C44.UPW]#C44#{peptidase unit: 10-180}~source ABG96592~	FALSE	0.84	292	1.585e-87	Glutamine amidotransferases class-II [PF13230.9]; Glutamine amidotransferase domain [PF13522.9]					0
ENBDON_00232_gene	SARSHI1M.gff3_genome	C	K14728	phthiodiolone/phenolphthiodiolone dimycocerosates ketoreductase [EC:1.2.-.-]								Luciferase-like monooxygenase [PF00296.23]					0
ENBDON_00233_gene	SARSHI1M.gff3_genome	C	K00038	3alpha(or 20beta)-hydroxysteroid dehydrogenase [EC:1.1.1.53]								Enoyl-(Acyl carrier protein) reductase [PF13561.9]; short chain dehydrogenase [PF00106.28]; KR domain [PF08659.13]					0
ENBDON_00234_gene	SARSHI1M.gff3_genome	D			MER0800858	I87	MER0800858 - family I87 unassigned peptidase inhibitors (Rhodococcus ruber) [I87.UPW]#I87#{inhibitor unit: 12-205}~source M2XPQ6~	TRUE	0.867	351	1.314e-107	SPFH domain / Band 7 family [PF01145.28]					0
ENBDON_00235_gene	SARSHI1M.gff3_genome	C	K18917	mycoredoxin [EC:1.20.4.3]								Glutaredoxin [PF00462.27]					0
ENBDON_00236_gene	SARSHI1M.gff3_genome	C	K16868	tellurite methyltransferase [EC:2.1.1.265]								Tellurite resistance protein TehB [PF03848.17]; Thiopurine S-methyltransferase (TPMT) [PF05724.14]; Methyltransferase domain [PF13489.9]; Methyltransferase domain [PF13649.9]; Methyltransferase domain [PF08241.15]; Nodulation protein S (NodS) [PF05401.14]; Methyltransferase domain [PF08242.15]; Methyltransferase domain [PF13847.9]; Mycolic acid cyclopropane synthetase [PF02353.23]; ubiE/COQ5 meth…					0
ENBDON_00237_gene	SARSHI1M.gff3_genome	D										Metal-sensitive transcriptional repressor [PF02583.20]					0
ENBDON_00238_gene	SARSHI1M.gff3_genome	E															0
ENBDON_00239_gene	SARSHI1M.gff3_genome	D										Rhodanese-like domain [PF00581.23]					0
ENBDON_00240_gene	SARSHI1M.gff3_genome	D										Thioesterase-like superfamily [PF13622.9]					0
ENBDON_00241_gene	SARSHI1M.gff3_genome	C	K03701	excinuclease ABC subunit A								ABC transporter [PF00005.30]; AAA domain, putative AbiEii toxin, Type IV TA system [PF13304.9]; RecF/RecN/SMC N terminal domain [PF02463.22]					0
ENBDON_00242_gene	SARSHI1M.gff3_genome	C	K07506	AraC family transcriptional regulator								Helix-turn-helix domain [PF12833.10]; Bacterial regulatory helix-turn-helix proteins, AraC family [PF00165.26]					0
ENBDON_00243_gene	SARSHI1M.gff3_genome	C	K22934	alpha,alpha-trehalase [EC:3.2.1.28]	MER0500276	I04	MER0500276 - family I4 unassigned peptidase inhibitors (Sulfolobus acidocaldarius) [I04.UPW]#I04#{inhibitor unit: 297-462}~source YP_007436604~	FALSE	0.392	112	1.087e-23	Glycosyl hydrolases family 15 [PF00723.24]; Trehalase-like, N-terminal [PF19291.2]	GH15	GH15 glucoamylase (EC 3.2.1.3); glucodextranase (EC 3.2.1.70); alpha,alpha-trehalase (EC 3.2.1.28); dextran dextrinase (EC 2.4.1.2)	3.2.1.205,3.2.1.28,3.2.1.3,3.2.1.70	GH15.hmm	0
ENBDON_00244_gene	SARSHI1M.gff3_genome	D										Glyoxalase-like domain [PF12681.10]; Glyoxalase/Bleomycin resistance protein/Dioxygenase superfamily [PF00903.28]; Glyoxalase-like domain [PF18029.4]					0
ENBDON_00245_gene	SARSHI1M.gff3_genome	C	K13283	ferrous-iron efflux pump FieF								Cation efflux family [PF01545.24]; Dimerisation domain of Zinc Transporter [PF16916.8]					0
ENBDON_00246_gene	SARSHI1M.gff3_genome	E															0
ENBDON_00247_gene	SARSHI1M.gff3_genome	C	K22108	TetR/AcrR family transcriptional regulator, cholesterol catabolism regulator								Tetracyclin repressor-like, C-terminal domain [PF17932.4]; Bacterial regulatory proteins, tetR family [PF00440.26]					0
ENBDON_00248_gene	SARSHI1M.gff3_genome	D										Phosphotransferase enzyme family [PF01636.26]					0
ENBDON_00249_gene	SARSHI1M.gff3_genome	C	K00249	acyl-CoA dehydrogenase [EC:1.3.8.7]								Acyl-CoA dehydrogenase, C-terminal domain [PF00441.27]; Acyl-CoA dehydrogenase, middle domain [PF02770.22]; Acyl-CoA dehydrogenase, C-terminal domain [PF08028.14]; Acyl-CoA dehydrogenase, N-terminal domain [PF02771.19]					0
ENBDON_00250_gene	SARSHI1M.gff3_genome	D										AMP-binding enzyme [PF00501.31]; AMP-binding enzyme C-terminal domain [PF13193.9]					0
ENBDON_00251_gene	SARSHI1M.gff3_genome	D			MER0011529	M20X	MER0011529 - family M20 unassigned peptidases (Campylobacter jejuni) [M20.UPW]#M20X#{peptidase unit: 1-415}~source Q9S3L1~	FALSE	0.347	113	1.357e-24	Sugar (and other) transporter [PF00083.27]; Major Facilitator Superfamily [PF07690.19]					0
ENBDON_00252_gene	SARSHI1M.gff3_genome	C	K13936	malonate transporter and related proteins								Membrane transport protein [PF03547.21]					0
ENBDON_00253_gene	SARSHI1M.gff3_genome	D										CGNR zinc finger [PF11706.11]					0
ENBDON_00254_gene	SARSHI1M.gff3_genome	E															0
ENBDON_00255_gene	SARSHI1M.gff3_genome	C	K03366	meso-butanediol dehydrogenase / (S,S)-butanediol dehydrogenase / diacetyl reductase [EC:1.1.1.- 1.1.1.76 1.1.1.304]								Enoyl-(Acyl carrier protein) reductase [PF13561.9]; short chain dehydrogenase [PF00106.28]; KR domain [PF08659.13]; Polysaccharide biosynthesis protein [PF02719.18]; NAD dependent epimerase/dehydratase family [PF01370.24]					0
ENBDON_00256_gene	SARSHI1M.gff3_genome	D										Bacterial transcriptional regulator [PF01614.21]; IclR helix-turn-helix domain [PF09339.13]					0
ENBDON_00257_gene	SARSHI1M.gff3_genome	C	K21267	rifampicin monooxygenase [EC:1.14.13.211]								FAD binding domain [PF01494.22]; Lycopene cyclase protein [PF05834.15]; HI0933-like protein [PF03486.17]; FAD dependent oxidoreductase [PF12831.10]; FAD dependent oxidoreductase [PF01266.27]; FAD binding domain [PF00890.27]; Pyridine nucleotide-disulphide oxidoreductase [PF07992.17]					0
ENBDON_00258_gene	SARSHI1M.gff3_genome	D										Cytochrome P450 [PF00067.25]; 2Fe-2S iron-sulfur cluster binding domain [PF00111.30]; Oxidoreductase FAD-binding domain [PF00970.27]; Oxidoreductase NAD-binding domain [PF00175.24]					0
ENBDON_00259_gene	SARSHI1M.gff3_genome	D			MER0011529	M20X	MER0011529 - family M20 unassigned peptidases (Campylobacter jejuni) [M20.UPW]#M20X#{peptidase unit: 1-415}~source Q9S3L1~	FALSE	0.314	104	1.017e-21	Sugar (and other) transporter [PF00083.27]; Major Facilitator Superfamily [PF07690.19]					0
ENBDON_00260_gene	SARSHI1M.gff3_genome	E															0
ENBDON_00261_gene	SARSHI1M.gff3_genome	D										Zincin-like metallopeptidase [PF06262.14]					0
ENBDON_00262_gene	SARSHI1M.gff3_genome	D										Septum formation [PF13845.9]					0
ENBDON_00263_gene	SARSHI1M.gff3_genome	D										Ankyrin repeats (3 copies) [PF12796.10]; Ankyrin repeats (many copies) [PF13857.9]; Ankyrin repeats (many copies) [PF13637.9]; Ankyrin repeat [PF00023.33]; Ankyrin repeat [PF13606.9]					0
ENBDON_00264_gene	SARSHI1M.gff3_genome	C	K01875	seryl-tRNA synthetase [EC:6.1.1.11]								tRNA synthetase class II core domain (G, H, P, S and T) [PF00587.28]; Seryl-tRNA synthetase N-terminal domain [PF02403.25]					0
ENBDON_00265_gene	SARSHI1M.gff3_genome	E															0
ENBDON_00266_gene	SARSHI1M.gff3_genome	D										Thioesterase superfamily [PF03061.25]; Domain of unknown function (DUF4442) [PF14539.9]					0
ENBDON_00267_gene	SARSHI1M.gff3_genome	E															0
ENBDON_00268_gene	SARSHI1M.gff3_genome	E															0
ENBDON_00269_gene	SARSHI1M.gff3_genome	C	K14952	UDP-MurNAc hydroxylase								Beta-lactamase superfamily domain [PF13483.9]; Rieske [2Fe-2S] domain [PF00355.29]; Beta-lactamase superfamily domain [PF12706.10]					0
ENBDON_00270_gene	SARSHI1M.gff3_genome	C	K00655	1-acyl-sn-glycerol-3-phosphate acyltransferase [EC:2.3.1.51]								Acyltransferase [PF01553.24]; Acyltransferase [PF19576.2]					0
ENBDON_00271_gene	SARSHI1M.gff3_genome	C	K21064	5-amino-6-(5-phospho-D-ribitylamino)uracil phosphatase [EC:3.1.3.104]								haloacid dehalogenase-like hydrolase [PF08282.15]; Sucrose-6F-phosphate phosphohydrolase [PF05116.16]					0
ENBDON_00272_gene	SARSHI1M.gff3_genome	D										N-acetylmuramoyl-L-alanine amidase [PF01510.28]					0
ENBDON_00273_gene	SARSHI1M.gff3_genome	C	K06381	stage II sporulation protein D								Stage II sporulation protein [PF08486.13]; LGFP repeat [PF08310.14]					0
ENBDON_00274_gene	SARSHI1M.gff3_genome	C	K14335	alpha-1,6-mannosyltransferase [EC:2.4.1.-]								Glycosyl transferases group 1 [PF00534.23]; Glycosyl transferases group 1 [PF13692.9]; Glycosyltransferase Family 4 [PF13439.9]; Glycosyl transferase 4-like domain [PF13579.9]	GT4	GT4 sucrose synthase (EC 2.4.1.13); sucrose-phosphate synthase (EC 2.4.1.14); alpha-glucosyltransferase (EC 2.4.1.52); lipopolysaccharide N-acetylglucosaminyltransferase (EC 2.4.1.56); phosphatidylinositol alpha-mannosyltransferase (EC 2.4.1.57); GDP-Man: Man1GlcNAc2-PP-dolichol alpha-1,3-mannosyltransferase (EC 2.4.1.132); GDP-Man: Man3GlcNAc2-PP-dolichol/Man4GlcNAc2-PP-dolichol alpha-1,2-mannos…	2.4.1.131,2.4.1.13,2.4.1.14,2.4.1.157,2.4.1.198,2.4.1.208,2.4.1.21,2.4.1.231,2.4.1.241,2.4.1.245,2.4.1.252,2.4.1.257,2.4.1.270,2.4.1.283,2.4.1.285,2.4.1.290,2.4.1.342,2.4.1.57,2.4.1.-,2.4.2.-,2.4.1.132	GT4.hmm	0
ENBDON_00275_gene	SARSHI1M.gff3_genome	D										Transcriptional regulator PadR-like family [PF03551.17]					0
ENBDON_00276_gene	SARSHI1M.gff3_genome	D										Vanillate O-demethylase oxygenase C-terminal domain [PF19112.3]; Rieske [2Fe-2S] domain [PF00355.29]					0
ENBDON_00277_gene	SARSHI1M.gff3_genome	D										Oxidoreductase FAD-binding domain [PF00970.27]; 2Fe-2S iron-sulfur cluster binding domain [PF00111.30]; MOSC domain [PF03473.20]					0
ENBDON_00278_gene	SARSHI1M.gff3_genome	D										Sugar (and other) transporter [PF00083.27]; Major Facilitator Superfamily [PF07690.19]; Fungal trichothecene efflux pump (TRI12) [PF06609.16]; Uncharacterised MFS-type transporter YbfB [PF06779.17]					0
ENBDON_00279_gene	SARSHI1M.gff3_genome	D										Predicted membrane protein (DUF2231) [PF09990.12]					0
ENBDON_00280_gene	SARSHI1M.gff3_genome	C	K21744	MerR family transcriptional regulator, thiopeptide resistance regulator								TipAS antibiotic-recognition domain [PF07739.16]; MerR HTH family regulatory protein [PF13411.9]; MerR family regulatory protein [PF00376.26]					0
ENBDON_00281_gene	SARSHI1M.gff3_genome	C	K01854	UDP-galactopyranose mutase [EC:5.4.99.9]								UDP-galactopyranose mutase [PF03275.16]; NAD(P)-binding Rossmann-like domain [PF13450.9]; FAD dependent oxidoreductase [PF12831.10]					0
ENBDON_00282_gene	SARSHI1M.gff3_genome	C	K16650	galactofuranosylgalactofuranosylrhamnosyl-N-acetylglucosaminyl-diphospho-decaprenol beta-1,5/1,6-galactofuranosyltransferase [EC:2.4.1.288]								Galactofuranosyltransferase-2, domain 3 [PF19320.2]; Galactofuranosyltransferase 2 N-terminal [PF17994.4]; Glycosyltransferase like family 2 [PF13641.9]	GT2_Glyco_tranf_2_3	GT2 cellulose synthase (EC 2.4.1.12); chitin synthase (EC 2.4.1.16); dolichyl-phosphate beta-D-mannosyltransferase (EC 2.4.1.83); dolichyl-phosphate beta-glucosyltransferase (EC 2.4.1.117); N-acetylglucosaminyltransferase (EC 2.4.1.-); N-acetylgalactosaminyltransferase (EC 2.4.1.-); hyaluronan synthase (EC 2.4.1.212); chitin oligosaccharide synthase (EC 2.4.1.-); beta-1,3-glucan synthase (EC 2.4.…		GT2_Glyco_tranf_2_3.hmm	0
ENBDON_00283_gene	SARSHI1M.gff3_genome	C	K19302	undecaprenyl-diphosphatase [EC:3.6.1.27]								PAP2 superfamily [PF01569.24]					0
ENBDON_00284_gene	SARSHI1M.gff3_genome	C	K14136	decaprenyl-phosphate phosphoribosyltransferase [EC:2.4.2.45]								UbiA prenyltransferase family [PF01040.21]					0
ENBDON_00285_gene	SARSHI1M.gff3_genome	C	K13687	arabinofuranosyltransferase [EC:2.4.2.-]									GT89	GT89 beta-D-arabinofuranosyl-1-monophosphoryldecaprenol : arabinan beta-1,2-arabinofuranosyltransferase (EC 2.4.2.-)	2.4.2.-	GT89.hmm	0
ENBDON_00286_gene	SARSHI1M.gff3_genome	C	K18851	diacylglycerol O-acyltransferase / trehalose O-mycolyltransferase [EC:2.3.1.20 2.3.1.122]	MER0173961	S09X	MER0173961 - family S9 non-peptidase homologues (Rhodococcus opacus) [S09.UNW]#S09X#{peptidase unit: 83-318}~source BAH52183~	TRUE	0.846	415	7.828e-129	Putative esterase [PF00756.23]; Prolyl oligopeptidase family [PF00326.24]	CE1	CE1 acetyl xylan esterase (EC 3.1.1.72); cinnamoyl esterase (EC 3.1.1.-); feruloyl esterase (EC 3.1.1.73); carboxylesterase (EC 3.1.1.1); S-formylglutathione hydrolase (EC 3.1.2.12); diacylglycerol O-acyltransferase (EC 2.3.1.20); trehalose 6-O-mycolyltransferase (EC 2.3.1.122)	2.3.1.122,3.1.1.72,3.2.1.8,3.1.1.-,2.3.1.20	CE1.hmm	0
ENBDON_00287_gene	SARSHI1M.gff3_genome	C	K18851	diacylglycerol O-acyltransferase / trehalose O-mycolyltransferase [EC:2.3.1.20 2.3.1.122]	MER0173963	S09X	MER0173963 - family S9 non-peptidase homologues (Rhodococcus opacus) [S09.UNW]#S09X#{peptidase unit: 119-367}~source BAH52185~	TRUE	0.867	450	6.866e-136	Putative esterase [PF00756.23]; LGFP repeat [PF08310.14]	CE1	CE1 acetyl xylan esterase (EC 3.1.1.72); cinnamoyl esterase (EC 3.1.1.-); feruloyl esterase (EC 3.1.1.73); carboxylesterase (EC 3.1.1.1); S-formylglutathione hydrolase (EC 3.1.2.12); diacylglycerol O-acyltransferase (EC 2.3.1.20); trehalose 6-O-mycolyltransferase (EC 2.3.1.122)	2.3.1.122,3.1.1.72,3.2.1.8,3.1.1.-,2.3.1.20	CE1.hmm	0
ENBDON_00288_gene	SARSHI1M.gff3_genome	E															0
ENBDON_00289_gene	SARSHI1M.gff3_genome	D										Cutinase [PF01083.25]; PE-PPE domain [PF08237.14]	CE5	CE5 acetyl xylan esterase (EC 3.1.1.72); cutinase (EC 3.1.1.74)	3.1.1.3,3.1.1.72,3.1.1.74	CE5.hmm	0
ENBDON_00290_gene	SARSHI1M.gff3_genome	D										Luciferase-like monooxygenase [PF00296.23]					0
ENBDON_00291_gene	SARSHI1M.gff3_genome	C	K12428	fatty acid CoA ligase FadD32								AMP-binding enzyme [PF00501.31]					0
ENBDON_00292_gene	SARSHI1M.gff3_genome	C	K12437	polyketide synthase 13								Beta-ketoacyl synthase, N-terminal domain [PF00109.29]; Acyl transferase domain [PF00698.24]; Beta-ketoacyl synthase, C-terminal domain [PF02801.25]; Thioesterase domain [PF00975.23]; Ketoacyl-synthetase C-terminal extension [PF16197.8]; Phosphopantetheine attachment site [PF00550.28]					0
ENBDON_00293_gene	SARSHI1M.gff3_genome	D										Carboxyl transferase domain [PF01039.25]					0
ENBDON_00294_gene	SARSHI1M.gff3_genome	E															0
ENBDON_00295_gene	SARSHI1M.gff3_genome	E															0
ENBDON_00296_gene	SARSHI1M.gff3_genome	C	K11386	arabinosyltransferase B [EC:2.4.2.-]								Mycobacterial cell wall arabinan synthesis protein [PF04602.15]; EmbC C-terminal domain [PF14896.9]; Arabinosyltransferase concanavalin like domain [PF17689.4]	GT53	GT53 UDP-L-Ara: alpha-L-arabinosyltransferase (EC 2.4.2.-); DecapreP-Araf: alpha-(1,3)-arabinosyltransferase (EC 2.4.2.-); DecapreP-Araf: Lipoarabinomannan alpha-(1,5)-arabinosyltransferase (EC 2.4.2.-)	2.4.2.-	GT53.hmm	0
ENBDON_00297_gene	SARSHI1M.gff3_genome	C	K11387	arabinosyltransferase C [EC:2.4.2.-]								Mycobacterial cell wall arabinan synthesis protein [PF04602.15]; EmbC C-terminal domain [PF14896.9]; Arabinosyltransferase concanavalin like domain [PF17689.4]	GT53	GT53 UDP-L-Ara: alpha-L-arabinosyltransferase (EC 2.4.2.-); DecapreP-Araf: alpha-(1,3)-arabinosyltransferase (EC 2.4.2.-); DecapreP-Araf: Lipoarabinomannan alpha-(1,5)-arabinosyltransferase (EC 2.4.2.-)	2.4.2.-	GT53.hmm	0
ENBDON_00298_gene	SARSHI1M.gff3_genome	D										Helix-turn-helix domain [PF13560.9]; Helix-turn-helix domain [PF12844.10]					0
ENBDON_00299_gene	SARSHI1M.gff3_genome	C	K01265	methionyl aminopeptidase [EC:3.4.11.18]	MER0395466	M24A	MER0395466 - subfamily M24A unassigned peptidases (Rhodococcus aetherivorans) [M24.UPA]#M24A#{peptidase unit: 2-255}~source CBB12345~	TRUE	0.907	483	4.374e-154	Metallopeptidase family M24 [PF00557.27]					0
ENBDON_00300_gene	SARSHI1M.gff3_genome	D										FAD linked oxidases, C-terminal domain [PF02913.22]; FAD binding domain [PF01565.26]; 4Fe-4S dicluster domain [PF13183.9]					0
ENBDON_00301_gene	SARSHI1M.gff3_genome	D										DoxX-like family [PF13564.9]					0
ENBDON_00302_gene	SARSHI1M.gff3_genome	C	K13686	galactan 5-O-arabinofuranosyltransferase [EC:2.4.2.46]								Arabinofuranosyltransferase N terminal [PF12250.11]; Arabinofuranosyltransferase A C terminal [PF12249.11]	GT85	GT85 beta-D-arabinofuranosyl monophosphoryldecaprenol: galactan alpha-D-arabinofuranosyltransferase (EC 2.4.2.-)	2.4.2.-	GT85.hmm	0
ENBDON_00303_gene	SARSHI1M.gff3_genome	C	K16652	decaprenylphospho-beta-D-erythro-pentofuranosid-2-ulose 2-reductase [EC:1.1.1.333]								short chain dehydrogenase [PF00106.28]; Enoyl-(Acyl carrier protein) reductase [PF13561.9]					0
ENBDON_00304_gene	SARSHI1M.gff3_genome	C	K16653	decaprenylphospho-beta-D-ribofuranose 2-oxidase [EC:1.1.98.3]								FAD binding domain [PF01565.26]; D-arabinono-1,4-lactone oxidase [PF04030.17]					0
ENBDON_00305_gene	SARSHI1M.gff3_genome	D										GtrA-like protein [PF04138.17]					0
ENBDON_00306_gene	SARSHI1M.gff3_genome	D										GtrA-like protein [PF04138.17]					0
ENBDON_00307_gene	SARSHI1M.gff3_genome	C	K01790	dTDP-4-dehydrorhamnose 3,5-epimerase [EC:5.1.3.13]								dTDP-4-dehydrorhamnose 3,5-epimerase [PF00908.20]					0
ENBDON_00308_gene	SARSHI1M.gff3_genome	C	K00973	glucose-1-phosphate thymidylyltransferase [EC:2.7.7.24]								Nucleotidyl transferase [PF00483.26]; MobA-like NTP transferase domain [PF12804.10]; 2-C-methyl-D-erythritol 4-phosphate cytidylyltransferase [PF01128.22]					0
ENBDON_00309_gene	SARSHI1M.gff3_genome	C	K01710	dTDP-glucose 4,6-dehydratase [EC:4.2.1.46]								GDP-mannose 4,6 dehydratase [PF16363.8]; NAD dependent epimerase/dehydratase family [PF01370.24]; 3-beta hydroxysteroid dehydrogenase/isomerase family [PF01073.22]; RmlD substrate binding domain [PF04321.20]; Male sterility protein [PF07993.15]; Polysaccharide biosynthesis protein [PF02719.18]					0
ENBDON_00310_gene	SARSHI1M.gff3_genome	D										NAD dependent epimerase/dehydratase family [PF01370.24]; GDP-mannose 4,6 dehydratase [PF16363.8]; RmlD substrate binding domain [PF04321.20]					0
ENBDON_00311_gene	SARSHI1M.gff3_genome	D										Glycosyl transferase family 2 [PF00535.29]; Glycosyltransferase like family 2 [PF13641.9]	GT2_Glycos_transf_2	GT2 cellulose synthase (EC 2.4.1.12); chitin synthase (EC 2.4.1.16); dolichyl-phosphate beta-D-mannosyltransferase (EC 2.4.1.83); dolichyl-phosphate beta-glucosyltransferase (EC 2.4.1.117); N-acetylglucosaminyltransferase (EC 2.4.1.-); N-acetylgalactosaminyltransferase (EC 2.4.1.-); hyaluronan synthase (EC 2.4.1.212); chitin oligosaccharide synthase (EC 2.4.1.-); beta-1,3-glucan synthase (EC 2.4.…		GT2_Glycos_transf_2.hmm	0
ENBDON_00312_gene	SARSHI1M.gff3_genome	D										Glycosyl transferase family 2 [PF00535.29]; Glycosyltransferase like family 2 [PF13641.9]; Glycosyltransferase like family 2 [PF10111.12]	GT2_Glycos_transf_2	GT2 cellulose synthase (EC 2.4.1.12); chitin synthase (EC 2.4.1.16); dolichyl-phosphate beta-D-mannosyltransferase (EC 2.4.1.83); dolichyl-phosphate beta-glucosyltransferase (EC 2.4.1.117); N-acetylglucosaminyltransferase (EC 2.4.1.-); N-acetylgalactosaminyltransferase (EC 2.4.1.-); hyaluronan synthase (EC 2.4.1.212); chitin oligosaccharide synthase (EC 2.4.1.-); beta-1,3-glucan synthase (EC 2.4.…		GT2_Glycos_transf_2.hmm	0
ENBDON_00313_gene	SARSHI1M.gff3_genome	E															0
ENBDON_00314_gene	SARSHI1M.gff3_genome	C	K16650	galactofuranosylgalactofuranosylrhamnosyl-N-acetylglucosaminyl-diphospho-decaprenol beta-1,5/1,6-galactofuranosyltransferase [EC:2.4.1.288]								Galactofuranosyltransferase-2, domain 3 [PF19320.2]; Galactofuranosyltransferase 2 N-terminal [PF17994.4]; Glycosyltransferase like family 2 [PF13641.9]	GT2_Glyco_tranf_2_3	GT2 cellulose synthase (EC 2.4.1.12); chitin synthase (EC 2.4.1.16); dolichyl-phosphate beta-D-mannosyltransferase (EC 2.4.1.83); dolichyl-phosphate beta-glucosyltransferase (EC 2.4.1.117); N-acetylglucosaminyltransferase (EC 2.4.1.-); N-acetylgalactosaminyltransferase (EC 2.4.1.-); hyaluronan synthase (EC 2.4.1.212); chitin oligosaccharide synthase (EC 2.4.1.-); beta-1,3-glucan synthase (EC 2.4.…		GT2_Glyco_tranf_2_3.hmm	0
ENBDON_00315_gene	SARSHI1M.gff3_genome	C	K14340	mannosyltransferase [EC:2.4.1.-]								Dolichyl-phosphate-mannose-protein mannosyltransferase [PF13231.9]	GT83	GT83 undecaprenyl phosphate-alpha-L-Ara4N: 4-amino-4-deoxy-beta-L-arabinosyltransferase (EC 2.4.2.43); dodecaprenyl phosphate-beta-galacturonic acid: lipopolysaccharide core alpha-galacturonosyl transferase (EC 2.4.1.-)	2.4.2.43	GT83.hmm	0
ENBDON_00316_gene	SARSHI1M.gff3_genome	C	K05303	O-methyltransferase [EC:2.1.1.-]								Macrocin-O-methyltransferase (TylF) [PF05711.14]					0
ENBDON_00317_gene	SARSHI1M.gff3_genome	C	K16649	rhamnopyranosyl-N-acetylglucosaminyl-diphospho-decaprenol beta-1,3/1,4-galactofuranosyltransferase [EC:2.4.1.287]													0
ENBDON_00318_gene	SARSHI1M.gff3_genome	D										ABC transporter [PF00005.30]					0
ENBDON_00319_gene	SARSHI1M.gff3_genome	C	K09690	lipopolysaccharide transport system permease protein													0
ENBDON_00320_gene	SARSHI1M.gff3_genome	D										Bacterial proteasome activator [PF10759.12]					0
ENBDON_00321_gene	SARSHI1M.gff3_genome	D										Aminotransferase class-V [PF00266.22]					0
ENBDON_00322_gene	SARSHI1M.gff3_genome	C	K00344	NADPH:quinone reductase [EC:1.6.5.5]								Zinc-binding dehydrogenase [PF13602.9]; Zinc-binding dehydrogenase [PF00107.29]; Alcohol dehydrogenase GroES-like domain [PF08240.15]					0
ENBDON_00323_gene	SARSHI1M.gff3_genome	D										MarR family [PF12802.10]; MarR family [PF01047.25]; Winged helix DNA-binding domain [PF13463.9]					0
ENBDON_00325_gene	SARSHI1M.gff3_genome	D										Protein of unknown function (DUF1254) [PF06863.15]; Protein of unknown function (DUF1214) [PF06742.14]					0
ENBDON_00326_gene	SARSHI1M.gff3_genome	C	K18851	diacylglycerol O-acyltransferase / trehalose O-mycolyltransferase [EC:2.3.1.20 2.3.1.122]	MER0226854	S09X	MER0226854 - family S9 non-peptidase homologues (Rhodococcus equi) [S09.UNW]#S09X#{peptidase unit: 104-340}~source YP_004005093~	TRUE	0.762	369	2.279e-113	Putative esterase [PF00756.23]	CE1	CE1 acetyl xylan esterase (EC 3.1.1.72); cinnamoyl esterase (EC 3.1.1.-); feruloyl esterase (EC 3.1.1.73); carboxylesterase (EC 3.1.1.1); S-formylglutathione hydrolase (EC 3.1.2.12); diacylglycerol O-acyltransferase (EC 2.3.1.20); trehalose 6-O-mycolyltransferase (EC 2.3.1.122)	2.3.1.122,3.1.1.72,3.2.1.8,3.1.1.-,2.3.1.20	CE1.hmm	0
ENBDON_00327_gene	SARSHI1M.gff3_genome	C	K01081	5'-nucleotidase [EC:3.1.3.5]								5'-nucleotidase, C-terminal domain [PF02872.21]					0
ENBDON_00328_gene	SARSHI1M.gff3_genome	C	K00817	histidinol-phosphate aminotransferase [EC:2.6.1.9]								Aminotransferase class I and II [PF00155.24]; Aminotransferase class-V [PF00266.22]; DegT/DnrJ/EryC1/StrS aminotransferase family [PF01041.20]; Allinase [PF04864.16]					0
ENBDON_00329_gene	SARSHI1M.gff3_genome	C	K01061	carboxymethylenebutenolidase [EC:3.1.1.45]	MER0173967	S09X	MER0173967 - family S9 non-peptidase homologues (Rhodococcus opacus) [S09.UNW]#S09X#{peptidase unit: 31-211}~source BAH52251~	FALSE	0.651	233	2.067e-67	Dienelactone hydrolase family [PF01738.21]; Prolyl oligopeptidase family [PF00326.24]					0
ENBDON_00332_gene	SARSHI1M.gff3_genome	D										Metallo-beta-lactamase superfamily [PF00753.30]; Rhodanese-like domain [PF00581.23]					0
ENBDON_00333_gene	SARSHI1M.gff3_genome	C	K07090	uncharacterized protein								Sulfite exporter TauE/SafE [PF01925.22]					0
ENBDON_00334_gene	SARSHI1M.gff3_genome	C	K07458	DNA mismatch endonuclease, patch repair protein [EC:3.1.-.-]								DNA mismatch endonuclease Vsr [PF03852.18]; Protein of unknown function (DUF559) [PF04480.15]; REase_MTES_1575 [PF18741.4]					0
ENBDON_00335_gene	SARSHI1M.gff3_genome	C	K00558	DNA (cytosine-5)-methyltransferase 1 [EC:2.1.1.37]								C-5 cytosine-specific DNA methylase [PF00145.20]					0
ENBDON_00336_gene	SARSHI1M.gff3_genome	E															0
ENBDON_00340_gene	SARSHI1M.gff3_genome	E															0
ENBDON_00341_gene	SARSHI1M.gff3_genome	C	K09968	uncharacterized protein													0
ENBDON_00342_gene	SARSHI1M.gff3_genome	C	K09957	uncharacterized protein								Putative glycolipid-binding [PF06475.14]					0
ENBDON_00343_gene	SARSHI1M.gff3_genome	C	K01426	amidase [EC:3.5.1.4]								Amidase [PF01425.24]					0
ENBDON_00344_gene	SARSHI1M.gff3_genome	C	K04517	prephenate dehydrogenase [EC:1.3.1.12]								Prephenate dehydrogenase, nucleotide-binding domain [PF02153.20]; Prephenate dehydrogenase, dimerization domain [PF20463.1]					0
ENBDON_00345_gene	SARSHI1M.gff3_genome	E															0
ENBDON_00346_gene	SARSHI1M.gff3_genome	C	K11991	tRNA(adenine34) deaminase [EC:3.5.4.33]								MafB19-like deaminase [PF14437.9]; Cytidine and deoxycytidylate deaminase zinc-binding region [PF00383.26]					0
ENBDON_00348_gene	SARSHI1M.gff3_genome	D										CobW/HypB/UreG, nucleotide-binding domain [PF02492.22]; Cobalamin synthesis protein cobW C-terminal domain [PF07683.17]					0
ENBDON_00349_gene	SARSHI1M.gff3_genome	C	K00784	ribonuclease Z [EC:3.1.26.11]								Beta-lactamase superfamily domain [PF12706.10]; Metallo-beta-lactamase superfamily [PF00753.30]					0
ENBDON_00350_gene	SARSHI1M.gff3_genome	C	K15537	alkylglycerol monooxygenase [EC:1.14.16.5]								Fatty acid hydroxylase [PF04116.16]					0
ENBDON_00351_gene	SARSHI1M.gff3_genome	D										Bacterial regulatory proteins, tetR family [PF00440.26]					0
ENBDON_00352_gene	SARSHI1M.gff3_genome	E															0
ENBDON_00353_gene	SARSHI1M.gff3_genome	D										Iron-dependent Transcriptional regulator [PF02082.23]					0
ENBDON_00354_gene	SARSHI1M.gff3_genome	D										MftR C-terminal domain [PF17754.4]; Bacterial regulatory proteins, tetR family [PF00440.26]					0
ENBDON_00355_gene	SARSHI1M.gff3_genome	C	K06994	putative drug exporter of the RND superfamily								MMPL family [PF03176.18]					0
ENBDON_00356_gene	SARSHI1M.gff3_genome	C	K18887	ATP-binding cassette, subfamily B, multidrug efflux pump								ABC transporter [PF00005.30]					0
ENBDON_00357_gene	SARSHI1M.gff3_genome	C	K18888	ATP-binding cassette, subfamily B, multidrug efflux pump								ABC transporter [PF00005.30]; ABC transporter transmembrane region [PF00664.26]					0
ENBDON_00358_gene	SARSHI1M.gff3_genome	D										Major Facilitator Superfamily [PF07690.19]					0
ENBDON_00359_gene	SARSHI1M.gff3_genome	C	K05596	LysR family transcriptional regulator, chromosome initiation inhibitor								Bacterial regulatory helix-turn-helix protein, lysR family [PF00126.30]					0
ENBDON_00360_gene	SARSHI1M.gff3_genome	C	K06895	L-lysine exporter family protein LysE/ArgO								LysE type translocator [PF01810.21]					0
ENBDON_00361_gene	SARSHI1M.gff3_genome	C	K07005	uncharacterized protein								Pyridoxamine 5'-phosphate oxidase [PF12900.10]					0
ENBDON_00362_gene	SARSHI1M.gff3_genome	C	K01537	P-type Ca2+ transporter type 2C [EC:7.2.2.10]								E1-E2 ATPase [PF00122.23]; Cation transporting ATPase, C-terminus [PF00689.24]; haloacid dehalogenase-like hydrolase [PF00702.29]; Cation transport ATPase (P-type) [PF13246.9]; Cation transporter/ATPase, N-terminus [PF00690.29]					0
ENBDON_00363_gene	SARSHI1M.gff3_genome	E															0
ENBDON_00364_gene	SARSHI1M.gff3_genome	D										Family of unknown function (DUF6448) [PF20046.2]					0
ENBDON_00365_gene	SARSHI1M.gff3_genome	D										Amidohydrolase [PF04909.17]					0
ENBDON_00366_gene	SARSHI1M.gff3_genome	C	K00456	cysteine dioxygenase [EC:1.13.11.20]								Cysteine dioxygenase type I [PF05995.15]					0
ENBDON_00367_gene	SARSHI1M.gff3_genome	C	K19577	MFS transporter, DHA1 family, inner membrane transport protein								Major Facilitator Superfamily [PF07690.19]; Sugar (and other) transporter [PF00083.27]; Uncharacterised MFS-type transporter YbfB [PF06779.17]					0
ENBDON_00368_gene	SARSHI1M.gff3_genome	C	K00773	queuine tRNA-ribosyltransferase [EC:2.4.2.29]								Queuine tRNA-ribosyltransferase [PF01702.21]					0
ENBDON_00369_gene	SARSHI1M.gff3_genome	C	K09125	queuosine precursor transporter								Putative vitamin uptake transporter [PF02592.18]					0
ENBDON_00370_gene	SARSHI1M.gff3_genome	E															0
ENBDON_00371_gene	SARSHI1M.gff3_genome	E															0
ENBDON_00372_gene	SARSHI1M.gff3_genome	C	K01885	glutamyl-tRNA synthetase [EC:6.1.1.17]								tRNA synthetases class I (E and Q), catalytic domain [PF00749.24]					0
ENBDON_00373_gene	SARSHI1M.gff3_genome	D										Bacterial regulatory helix-turn-helix protein, lysR family [PF00126.30]					0
ENBDON_00374_gene	SARSHI1M.gff3_genome	C	K08172	MFS transporter, MHS family, shikimate and dehydroshikimate transport protein	MER0011529	M20X	MER0011529 - family M20 unassigned peptidases (Campylobacter jejuni) [M20.UPW]#M20X#{peptidase unit: 1-415}~source Q9S3L1~	FALSE	0.26	139	4.409e-33	Sugar (and other) transporter [PF00083.27]; Major Facilitator Superfamily [PF07690.19]; Fungal trichothecene efflux pump (TRI12) [PF06609.16]					0
ENBDON_00375_gene	SARSHI1M.gff3_genome	C	K00019	3-hydroxybutyrate dehydrogenase [EC:1.1.1.30]								Enoyl-(Acyl carrier protein) reductase [PF13561.9]; short chain dehydrogenase [PF00106.28]					0
ENBDON_00376_gene	SARSHI1M.gff3_genome	D										Bacterial regulatory proteins, tetR family [PF00440.26]					0
ENBDON_00377_gene	SARSHI1M.gff3_genome	D										Copper/zinc superoxide dismutase (SODC) [PF00080.23]					0
ENBDON_00378_gene	SARSHI1M.gff3_genome	E															0
ENBDON_00379_gene	SARSHI1M.gff3_genome	D										Calcineurin-like phosphoesterase [PF00149.31]					0
ENBDON_00380_gene	SARSHI1M.gff3_genome	D										Mycothiol maleylpyruvate isomerase N-terminal domain [PF11716.11]					0
ENBDON_00381_gene	SARSHI1M.gff3_genome	D										Helix-turn-helix domain [PF12833.10]; Domain of unknown function (DUF6597) [PF20240.1]					0
ENBDON_00382_gene	SARSHI1M.gff3_genome	D										Protein of unknown function (DUF1275) [PF06912.14]					0
ENBDON_00383_gene	SARSHI1M.gff3_genome	D										Protein of unknown function (DUF1524) [PF07510.14]; Excalibur calcium-binding domain [PF05901.14]					0
ENBDON_00384_gene	SARSHI1M.gff3_genome	C	K07497	putative transposase								Integrase core domain [PF00665.29]; Integrase core domain [PF13683.9]					0
ENBDON_00385_gene	SARSHI1M.gff3_genome	E															0
ENBDON_00386_gene	SARSHI1M.gff3_genome	E															0
ENBDON_00389_gene	SARSHI1M.gff3_genome	D										Aspartate amino-transferase [PF12897.10]					0
ENBDON_00390_gene	SARSHI1M.gff3_genome	D										GDSL-like Lipase/Acylhydrolase family [PF13472.9]					0
ENBDON_00391_gene	SARSHI1M.gff3_genome	D										Family of unknown function (DUF6098) [PF19593.2]					0
ENBDON_00392_gene	SARSHI1M.gff3_genome	D			MER0887169	M48B	MER0887169 - subfamily M48B non-peptidase homologues (Mycobacterium cosmeticum) [M48.UNB]#M48B#{peptidase unit: 112-224}~source W9B8U0~	FALSE	0.499	92	1.071e-18	Peptidase family M48 [PF01435.21]; BlaR1 peptidase M56 [PF05569.14]					0
ENBDON_00393_gene	SARSHI1M.gff3_genome	D										Penicillinase repressor [PF03965.19]					0
ENBDON_00394_gene	SARSHI1M.gff3_genome	D										Predicted membrane protein (DUF2231) [PF09990.12]					0
ENBDON_00395_gene	SARSHI1M.gff3_genome	E															0
ENBDON_00396_gene	SARSHI1M.gff3_genome	D										HhH-GPD superfamily base excision DNA repair protein [PF00730.28]					0
ENBDON_00397_gene	SARSHI1M.gff3_genome	E															0
ENBDON_00398_gene	SARSHI1M.gff3_genome	D										Transglycosylase associated protein [PF04226.16]					0
ENBDON_00399_gene	SARSHI1M.gff3_genome	D										Domain of unknown function (DUF4193) [PF13834.9]					0
ENBDON_00400_gene	SARSHI1M.gff3_genome	C	K19355	mannan endo-1,4-beta-mannosidase [EC:3.2.1.78]								Cellulase (glycosyl hydrolase family 5) [PF00150.21]					0
ENBDON_00401_gene	SARSHI1M.gff3_genome	E															0
ENBDON_00402_gene	SARSHI1M.gff3_genome	E															0
ENBDON_00403_gene	SARSHI1M.gff3_genome	C	K07124	uncharacterized protein								short chain dehydrogenase [PF00106.28]; Enoyl-(Acyl carrier protein) reductase [PF13561.9]; KR domain [PF08659.13]					0
ENBDON_00404_gene	SARSHI1M.gff3_genome	C	K02343	DNA polymerase III subunit gamma/tau [EC:2.7.7.7]								DNA polymerase III, delta subunit [PF13177.9]; DNA polymerase III subunits gamma and tau domain III [PF12169.11]; Holliday junction DNA helicase RuvB P-loop domain [PF05496.15]; ATPase family associated with various cellular activities (AAA) [PF00004.32]					0
ENBDON_00405_gene	SARSHI1M.gff3_genome	C	K01426	amidase [EC:3.5.1.4]								Amidase [PF01425.24]					0
ENBDON_00406_gene	SARSHI1M.gff3_genome	D										Bacterial regulatory proteins, luxR family [PF00196.22]					0
ENBDON_00407_gene	SARSHI1M.gff3_genome	D										Bacterial transcriptional regulator [PF01614.21]; IclR helix-turn-helix domain [PF09339.13]					0
ENBDON_00408_gene	SARSHI1M.gff3_genome	D										Amino acid permease [PF00324.24]; Amino acid permease [PF13520.9]					0
ENBDON_00409_gene	SARSHI1M.gff3_genome	C	K00146	phenylacetaldehyde dehydrogenase [EC:1.2.1.39]								Aldehyde dehydrogenase family [PF00171.25]; Protein of unknown function (DUF1487) [PF07368.14]					0
ENBDON_00410_gene	SARSHI1M.gff3_genome	D										Amino acid permease [PF00324.24]; Amino acid permease [PF13520.9]					0
ENBDON_00411_gene	SARSHI1M.gff3_genome	C	K00276	primary-amine oxidase [EC:1.4.3.21]								Copper amine oxidase, enzyme domain [PF01179.23]; Copper amine oxidase, N3 domain [PF02728.19]; Copper amine oxidase, N2 domain [PF02727.19]					0
ENBDON_00412_gene	SARSHI1M.gff3_genome	E															0
ENBDON_00413_gene	SARSHI1M.gff3_genome	C	K22278	peptidoglycan-N-acetylglucosamine deacetylase [EC:3.5.1.104]								Polysaccharide deacetylase [PF01522.24]	CE4	CE4 acetyl xylan esterase (EC 3.1.1.72); chitin deacetylase (EC 3.5.1.41); chitooligosaccharide deacetylase (EC 3.5.1.-); peptidoglycan GlcNAc deacetylase (EC 3.5.1.-); peptidoglycan N-acetylmuramic acid deacetylase (EC 3.5.1.-).	2.4.1.-,3.1.1.6,3.1.1.72,3.1.1.-,3.2.1.8,3.2.1.-,3.5.1.104,3.5.1.41,3.5.1.-	CE4.hmm	0
ENBDON_00414_gene	SARSHI1M.gff3_genome	D										Cutinase [PF01083.25]; PE-PPE domain [PF08237.14]					0
ENBDON_00415_gene	SARSHI1M.gff3_genome	C	K11749	regulator of sigma E protease [EC:3.4.24.-]	MER0896839	M50B	MER0896839 - subfamily M50B unassigned peptidases (Rhodococcus ruber) [M50.UPB]#M50B#{peptidase unit: 13-354}~source M2YWE3~	TRUE	0.944	679	3.054e-219	Peptidase family M50 [PF02163.25]; PDZ domain [PF13180.9]					0
ENBDON_00416_gene	SARSHI1M.gff3_genome	E															0
ENBDON_00417_gene	SARSHI1M.gff3_genome	C	K07727	putative transcriptional regulator								Cro/C1-type HTH DNA-binding domain [PF13443.9]; Helix-turn-helix domain [PF12844.10]; Helix-turn-helix domain [PF13560.9]					0
ENBDON_00418_gene	SARSHI1M.gff3_genome	E															0
ENBDON_00419_gene	SARSHI1M.gff3_genome	E															0
ENBDON_00420_gene	SARSHI1M.gff3_genome	D										Histidine kinase [PF07730.16]					0
ENBDON_00421_gene	SARSHI1M.gff3_genome	D										Response regulator receiver domain [PF00072.27]; Bacterial regulatory proteins, luxR family [PF00196.22]					0
ENBDON_00422_gene	SARSHI1M.gff3_genome	C	K00626	acetyl-CoA C-acetyltransferase [EC:2.3.1.9]								Thiolase, N-terminal domain [PF00108.26]; Thiolase, C-terminal domain [PF02803.21]					0
ENBDON_00423_gene	SARSHI1M.gff3_genome	C	K01782	3-hydroxyacyl-CoA dehydrogenase / enoyl-CoA hydratase / 3-hydroxybutyryl-CoA epimerase [EC:1.1.1.35 4.2.1.17 5.1.2.3]	MER1073108	S49C	MER1073108 - subfamily S49C non-peptidase homologues (Deferribacter desulfuricans) [S49.UNC]#S49C#{peptidase unit: 109-219}~source D3P9A0~	FALSE	0.409	76	1.295e-12	3-hydroxyacyl-CoA dehydrogenase, NAD binding domain [PF02737.21]; Enoyl-CoA hydratase/isomerase [PF00378.23]; Enoyl-CoA hydratase/isomerase [PF16113.8]; 3-hydroxyacyl-CoA dehydrogenase, C-terminal domain [PF00725.25]					0
ENBDON_00424_gene	SARSHI1M.gff3_genome	C	K00574	cyclopropane-fatty-acyl-phospholipid synthase [EC:2.1.1.79]								Mycolic acid cyclopropane synthetase [PF02353.23]; Methyltransferase domain [PF13489.9]; Methyltransferase domain [PF08241.15]; Methyltransferase domain [PF13847.9]; Methyltransferase domain [PF13649.9]; ubiE/COQ5 methyltransferase family [PF01209.21]; Methyltransferase small domain [PF05175.17]; Methyltransferase domain [PF08242.15]; Protein-L-isoaspartate(D-aspartate) O-methyltransferase (PCMT)…					0
ENBDON_00425_gene	SARSHI1M.gff3_genome	C	K09828	Delta24-sterol reductase [EC:1.3.1.72 1.3.1.-]								FAD binding domain [PF01565.26]					0
ENBDON_00426_gene	SARSHI1M.gff3_genome	E															0
ENBDON_00427_gene	SARSHI1M.gff3_genome	C	K01448	N-acetylmuramoyl-L-alanine amidase [EC:3.5.1.28]								N-acetylmuramoyl-L-alanine amidase [PF01520.21]					0
ENBDON_00428_gene	SARSHI1M.gff3_genome	C	K09747	nucleoid-associated protein EbfC								YbaB/EbfC DNA-binding family [PF02575.19]					0
ENBDON_00429_gene	SARSHI1M.gff3_genome	C	K06187	recombination protein RecR								Toprim domain [PF13662.9]; RecR protein [PF02132.18]					0
ENBDON_00430_gene	SARSHI1M.gff3_genome	D										Tetracyclin repressor-like, C-terminal domain [PF17920.4]; Bacterial regulatory proteins, tetR family [PF00440.26]					0
ENBDON_00431_gene	SARSHI1M.gff3_genome	D										Fungal trichothecene efflux pump (TRI12) [PF06609.16]; Major Facilitator Superfamily [PF07690.19]; Sugar (and other) transporter [PF00083.27]					0
ENBDON_00432_gene	SARSHI1M.gff3_genome	D										ER-bound oxygenase mpaB/B'/Rubber oxygenase, catalytic domain [PF09995.12]					0
ENBDON_00433_gene	SARSHI1M.gff3_genome	D										Aldehyde dehydrogenase family [PF00171.25]					0
ENBDON_00434_gene	SARSHI1M.gff3_genome	D										Acyl-CoA dehydrogenase, C-terminal domain [PF00441.27]; Acyl-CoA dehydrogenase, middle domain [PF02770.22]; Acyl-CoA dehydrogenase, N-terminal domain [PF02771.19]; Acyl-CoA dehydrogenase, C-terminal domain [PF08028.14]					0
ENBDON_00435_gene	SARSHI1M.gff3_genome	D										Bacterial regulatory proteins, gntR family [PF00392.24]; FCD domain [PF07729.15]					0
ENBDON_00436_gene	SARSHI1M.gff3_genome	E															0
ENBDON_00437_gene	SARSHI1M.gff3_genome	D										Bacterial regulatory proteins, tetR family [PF00440.26]					0
ENBDON_00438_gene	SARSHI1M.gff3_genome	E															0
ENBDON_00439_gene	SARSHI1M.gff3_genome	D										Enoyl-CoA hydratase/isomerase [PF00378.23]; Enoyl-CoA hydratase/isomerase [PF16113.8]					0
ENBDON_00440_gene	SARSHI1M.gff3_genome	C	K00666	fatty-acyl-CoA synthase [EC:6.2.1.-]								AMP-binding enzyme [PF00501.31]; AMP-binding enzyme C-terminal domain [PF13193.9]					0
ENBDON_00441_gene	SARSHI1M.gff3_genome	E															0
ENBDON_00442_gene	SARSHI1M.gff3_genome	E															0
ENBDON_00443_gene	SARSHI1M.gff3_genome	E															0
ENBDON_00444_gene	SARSHI1M.gff3_genome	E															0
ENBDON_00445_gene	SARSHI1M.gff3_genome	D										ANTAR domain [PF03861.17]					0
ENBDON_00446_gene	SARSHI1M.gff3_genome	C	K07009	lipid II isoglutaminyl synthase (glutamine-hydrolysing) [EC:6.3.5.13]	MER0151645	C26	MER0151645 - family C26 non-peptidase homologues (Rhodococcus jostii) [C26.UNW]#C26#{peptidase unit: 1-236}~source ABG96008~	TRUE	0.818	396	3.117e-124	CobB/CobQ-like glutamine amidotransferase domain [PF07685.17]					0
ENBDON_00447_gene	SARSHI1M.gff3_genome	C	K23393	lipid II isoglutaminyl synthase (glutamine-hydrolysing) [EC:6.3.5.13]								MurT ligase C-terminal [PF08353.13]; Mur ligase middle domain [PF08245.15]					0
ENBDON_00448_gene	SARSHI1M.gff3_genome	D										TrkA-N domain [PF02254.21]					0
ENBDON_00449_gene	SARSHI1M.gff3_genome	D										Protein of unknown function, DUF488 [PF04343.16]					0
ENBDON_00450_gene	SARSHI1M.gff3_genome	C	K01692	enoyl-CoA hydratase [EC:4.2.1.17]	MER1072352	S49C	MER1072352 - subfamily S49C non-peptidase homologues (Thermus thermophilus) [S49.UNC]#S49C#{peptidase unit: 85-201}~source P83702~	FALSE	0.437	83	4.06e-16	Enoyl-CoA hydratase/isomerase [PF00378.23]; Enoyl-CoA hydratase/isomerase [PF16113.8]					0
ENBDON_00451_gene	SARSHI1M.gff3_genome	E															0
ENBDON_00452_gene	SARSHI1M.gff3_genome	C	K01649	2-isopropylmalate synthase [EC:2.3.3.13]								HMGL-like [PF00682.22]; LeuA allosteric (dimerisation) domain [PF08502.13]					0
ENBDON_00453_gene	SARSHI1M.gff3_genome	D										Domain of unknown function (DUF4185) [PF13810.9]					0
ENBDON_00454_gene	SARSHI1M.gff3_genome	D										Bacterial low temperature requirement A protein (LtrA) [PF06772.14]					0
ENBDON_00455_gene	SARSHI1M.gff3_genome	C	K00928	aspartate kinase [EC:2.7.2.4]								Amino acid kinase family [PF00696.31]; ACT domain [PF13840.9]; ACT domain [PF01842.28]					0
ENBDON_00456_gene	SARSHI1M.gff3_genome	C	K00133	aspartate-semialdehyde dehydrogenase [EC:1.2.1.11]								Semialdehyde dehydrogenase, dimerisation domain [PF02774.21]; Semialdehyde dehydrogenase, NAD binding domain [PF01118.27]					0
ENBDON_00457_gene	SARSHI1M.gff3_genome	D										SPW repeat [PF03779.17]					0
ENBDON_00458_gene	SARSHI1M.gff3_genome	D										Bacterial regulatory proteins, tetR family [PF00440.26]; Tetracyclin repressor-like, C-terminal domain [PF16859.8]					0
ENBDON_00459_gene	SARSHI1M.gff3_genome	D										MaoC like domain [PF01575.22]					0
ENBDON_00460_gene	SARSHI1M.gff3_genome	C	K07045	uncharacterized protein								Amidohydrolase [PF04909.17]					0
ENBDON_00461_gene	SARSHI1M.gff3_genome	D										Enoyl-(Acyl carrier protein) reductase [PF13561.9]; short chain dehydrogenase [PF00106.28]; KR domain [PF08659.13]					0
ENBDON_00462_gene	SARSHI1M.gff3_genome	D										Winged helix DNA-binding domain [PF13463.9]; MarR family [PF01047.25]; MarR family [PF12802.10]					0
ENBDON_00463_gene	SARSHI1M.gff3_genome	E															0
ENBDON_00464_gene	SARSHI1M.gff3_genome	E															0
ENBDON_00465_gene	SARSHI1M.gff3_genome	D										AMP-binding enzyme [PF00501.31]					0
ENBDON_00466_gene	SARSHI1M.gff3_genome	D										HNH endonuclease [PF14279.9]; HNH endonuclease [PF01844.26]					0
ENBDON_00467_gene	SARSHI1M.gff3_genome	D										Tetracyclin repressor-like, C-terminal domain [PF17918.4]; Bacterial regulatory proteins, tetR family [PF00440.26]					0
ENBDON_00468_gene	SARSHI1M.gff3_genome	D										ER-bound oxygenase mpaB/B'/Rubber oxygenase, catalytic domain [PF09995.12]					0
ENBDON_00469_gene	SARSHI1M.gff3_genome	D										Acetyltransferase (GNAT) domain [PF13673.10]; Acetyltransferase (GNAT) domain [PF13508.10]; Acetyltransferase (GNAT) family [PF00583.28]; Acetyltransferase (GNAT) domain [PF13420.10]					0
ENBDON_00470_gene	SARSHI1M.gff3_genome	E															0
ENBDON_00471_gene	SARSHI1M.gff3_genome	D										AraR C-terminal winged HTH domain [PF19368.2]					0
ENBDON_00472_gene	SARSHI1M.gff3_genome	C	K05521	ADP-ribosyl-[dinitrogen reductase] hydrolase [EC:3.2.2.24]								ADP-ribosylglycohydrolase [PF03747.17]					0
ENBDON_00473_gene	SARSHI1M.gff3_genome	C	K23518	O-acetyl-ADP-ribose deacetylase [EC:3.1.1.106]								Macro domain [PF01661.24]					0
ENBDON_00474_gene	SARSHI1M.gff3_genome	D										Glycosyl hydrolase family 65 central catalytic domain [PF03632.18]; Glycosyl hydrolase family 65, N-terminal domain [PF03636.18]	GH65	GH65 alpha,alpha-trehalase (EC 3.2.1.28); maltose phosphorylase (EC 2.4.1.8); trehalose phosphorylase (EC 2.4.1.64); kojibiose phosphorylase (EC 2.4.1.230); trehalose-6-phosphate phosphorylase (EC 2.4.1.216); nigerose phosphorylase (EC 2.4.1.279); 3-O-alpha-glucopyranosyl-L-rhamnose phosphorylase (EC 2.4.1.282); 1,2-alpha-glucosylglycerol phosphorylase (EC 2.4.1.332); alpha-glucosyl-1,2-beta-gala…	2.4.1.216,2.4.1.230,2.4.1.279,2.4.1.282,2.4.1.332,2.4.1.334,2.4.1.64,2.4.1.8,2.4.1.-,3.2.1.107,3.2.1.216,3.2.1.28	GH65.hmm	0
ENBDON_00475_gene	SARSHI1M.gff3_genome	C	K01087	trehalose 6-phosphate phosphatase [EC:3.1.3.12]								Trehalose-phosphatase [PF02358.19]					0
ENBDON_00476_gene	SARSHI1M.gff3_genome	C	K21903	ArsR family transcriptional regulator, lead/cadmium/zinc/bismuth-responsive transcriptional repressor								Helix-turn-helix domain [PF12840.10]; Bacterial regulatory protein, arsR family [PF01022.23]					0
ENBDON_00477_gene	SARSHI1M.gff3_genome	C	K04651	hydrogenase nickel incorporation protein HypA/HybF								Hydrogenase/urease nickel incorporation, metallochaperone, hypA [PF01155.22]					0
ENBDON_00478_gene	SARSHI1M.gff3_genome	C	K04652	hydrogenase nickel incorporation protein HypB								CobW/HypB/UreG, nucleotide-binding domain [PF02492.22]					0
ENBDON_00479_gene	SARSHI1M.gff3_genome	C	K06282	hydrogenase small subunit [EC:1.12.99.6]								NiFe/NiFeSe hydrogenase small subunit C-terminal [PF14720.9]; NADH ubiquinone oxidoreductase, 20 Kd subunit [PF01058.25]					0
ENBDON_00480_gene	SARSHI1M.gff3_genome	D										Nickel-dependent hydrogenase [PF00374.22]					0
ENBDON_00481_gene	SARSHI1M.gff3_genome	C	K19168	toxin CptA								NifU-like domain [PF01106.20]; Rieske-like [2Fe-2S] domain [PF13806.9]					0
ENBDON_00482_gene	SARSHI1M.gff3_genome	D										Family of unknown function (DUF5947) [PF19372.2]					0
ENBDON_00483_gene	SARSHI1M.gff3_genome	D										Family of unknown function (DUF6084) [PF19562.2]					0
ENBDON_00484_gene	SARSHI1M.gff3_genome	E															0
ENBDON_00485_gene	SARSHI1M.gff3_genome	E															0
ENBDON_00486_gene	SARSHI1M.gff3_genome	C	K03605	hydrogenase maturation protease [EC:3.4.23.-]	MER0255924	A31	MER0255924 - family A31 unassigned peptidases (Rhodococcus ruber) [A31.UPW]#A31#{peptidase unit: 4-147}~source M3A108~	FALSE	0.916	278	7.876e-85	Hydrogenase maturation protease [PF01750.21]					0
ENBDON_00487_gene	SARSHI1M.gff3_genome	C	K04653	hydrogenase expression/formation protein HypC								HupF/HypC family [PF01455.21]					0
ENBDON_00488_gene	SARSHI1M.gff3_genome	C	K04656	hydrogenase maturation protein HypF								Telomere recombination [PF01300.21]; HypF Kae1-like domain [PF17788.4]; Acylphosphatase [PF00708.21]; HypF finger [PF07503.15]					0
ENBDON_00489_gene	SARSHI1M.gff3_genome	C	K04653	hydrogenase expression/formation protein HypC								HupF/HypC family [PF01455.21]					0
ENBDON_00490_gene	SARSHI1M.gff3_genome	C	K03271	D-sedoheptulose 7-phosphate isomerase [EC:5.3.1.28]								SIS domain [PF13580.9]; SIS domain [PF01380.25]					0
ENBDON_00491_gene	SARSHI1M.gff3_genome	C	K04655	hydrogenase expression/formation protein HypE								AIR synthase related protein, C-terminal domain [PF02769.25]; AIR synthase related protein, N-terminal domain [PF00586.27]					0
ENBDON_00492_gene	SARSHI1M.gff3_genome	C	K04653	hydrogenase expression/formation protein HypC								HupF/HypC family [PF01455.21]					0
ENBDON_00493_gene	SARSHI1M.gff3_genome	C	K04654	hydrogenase expression/formation protein HypD								Hydrogenase formation hypA family [PF01924.19]					0
ENBDON_00494_gene	SARSHI1M.gff3_genome	D										Family of unknown function (DUF6390) [PF19927.2]					0
ENBDON_00495_gene	SARSHI1M.gff3_genome	C	K02006	cobalt/nickel transport system ATP-binding protein								ABC transporter [PF00005.30]					0
ENBDON_00496_gene	SARSHI1M.gff3_genome	C	K02008	cobalt/nickel transport system permease protein								Cobalt transport protein [PF02361.19]					0
ENBDON_00497_gene	SARSHI1M.gff3_genome	D										PDGLE domain [PF13190.9]					0
ENBDON_00498_gene	SARSHI1M.gff3_genome	C	K02007	cobalt/nickel transport system permease protein								Cobalt uptake substrate-specific transmembrane region [PF01891.19]					0
ENBDON_00499_gene	SARSHI1M.gff3_genome	E															0
ENBDON_00500_gene	SARSHI1M.gff3_genome	E															0
ENBDON_00501_gene	SARSHI1M.gff3_genome	E															0
ENBDON_00502_gene	SARSHI1M.gff3_genome	C	K21885	ArsR family transcriptional regulator, cadmium/lead-responsive transcriptional repressor								Helix-turn-helix domain [PF12840.10]; Bacterial regulatory protein, arsR family [PF01022.23]; HxlR-like helix-turn-helix [PF01638.20]					0
ENBDON_00503_gene	SARSHI1M.gff3_genome	D										Cation efflux family [PF01545.24]					0
ENBDON_00504_gene	SARSHI1M.gff3_genome	D										Protein of unknown function (DUF3703) [PF12487.11]					0
ENBDON_00505_gene	SARSHI1M.gff3_genome	C	K06998	trans-2,3-dihydro-3-hydroxyanthranilate isomerase [EC:5.3.3.17]								Phenazine biosynthesis-like protein [PF02567.19]					0
ENBDON_00506_gene	SARSHI1M.gff3_genome	D			MER0011529	M20X	MER0011529 - family M20 unassigned peptidases (Campylobacter jejuni) [M20.UPW]#M20X#{peptidase unit: 1-415}~source Q9S3L1~	FALSE	0.371	132	1.303e-30	Sugar (and other) transporter [PF00083.27]; Major Facilitator Superfamily [PF07690.19]					0
ENBDON_00507_gene	SARSHI1M.gff3_genome	C	K00666	fatty-acyl-CoA synthase [EC:6.2.1.-]								AMP-binding enzyme [PF00501.31]; AMP-binding enzyme C-terminal domain [PF13193.9]					0
ENBDON_00508_gene	SARSHI1M.gff3_genome	D										Acyl-CoA dehydrogenase, C-terminal domain [PF00441.27]; Acyl-CoA dehydrogenase, middle domain [PF02770.22]; Acyl-CoA dehydrogenase, N-terminal domain [PF02771.19]					0
ENBDON_00509_gene	SARSHI1M.gff3_genome	D										Bacterial regulatory proteins, tetR family [PF00440.26]					0
ENBDON_00510_gene	SARSHI1M.gff3_genome	D										Flavin-binding monooxygenase-like [PF00743.22]; L-lysine 6-monooxygenase/L-ornithine 5-monooxygenase [PF13434.9]; Pyridine nucleotide-disulphide oxidoreductase [PF07992.17]; NAD(P)-binding Rossmann-like domain [PF13450.9]					0
ENBDON_00511_gene	SARSHI1M.gff3_genome	C	K03333	cholesterol oxidase [EC:1.1.3.6]								GMC oxidoreductase [PF00732.22]; GMC oxidoreductase [PF05199.16]; FAD dependent oxidoreductase [PF01266.27]; FAD binding domain [PF00890.27]	AA3; AA3_2	AA3 cellobiose dehydrogenase (EC 1.1.99.18); glucose 1-oxidase (EC 1.1.3.4); aryl alcohol oxidase (EC 1.1.3.7); alcohol oxidase (EC 1.1.3.13); pyranose oxidase (EC 1.1.3.10); glucose 1-dehydrogenase (FAD, quinone) (EC 1.1.5.9); pyranose dehydrogenase (EC 1.1.99.29); oligosaccharide dehydrogenase (FAD) (EC 1.1.5.-)	; 1.1.3.16,1.1.3.4,1.1.3.7,1.1.5.9,1.1.5.-,1.1.99.29	AA3.hmm	0
ENBDON_00512_gene	SARSHI1M.gff3_genome	D										Acetoacetate decarboxylase (ADC) [PF06314.14]					0
ENBDON_00513_gene	SARSHI1M.gff3_genome	D										Domain of unknown function (DUF5602) [PF18197.4]					0
ENBDON_00514_gene	SARSHI1M.gff3_genome	D										Domain of unknown function (DUF5602) [PF18197.4]					0
ENBDON_00515_gene	SARSHI1M.gff3_genome	C	K22297	Fur family transcriptional regulator, stress-responsive regulator								Ferric uptake regulator family [PF01475.22]					0
ENBDON_00516_gene	SARSHI1M.gff3_genome	C	K03781	catalase [EC:1.11.1.6]								Catalase [PF00199.22]; Catalase-related immune-responsive [PF06628.15]					0
ENBDON_00517_gene	SARSHI1M.gff3_genome	C	K04047	starvation-inducible DNA-binding protein								Ferritin-like domain [PF00210.27]					0
ENBDON_00518_gene	SARSHI1M.gff3_genome	C	K07038	inner membrane protein								LexA-binding, inner membrane-associated putative hydrolase [PF04307.17]					0
ENBDON_00519_gene	SARSHI1M.gff3_genome	D										Cholesterol oxidase, substrate-binding [PF09129.14]; FAD binding domain [PF01565.26]; D-arabinono-1,4-lactone oxidase [PF04030.17]					0
ENBDON_00520_gene	SARSHI1M.gff3_genome	C	K06113	arabinan endo-1,5-alpha-L-arabinosidase [EC:3.2.1.99]								Glycosyl hydrolases family 43 [PF04616.17]	GH43; GH43_10; GH43_11; GH43_12; GH43_29; GH43_30; GH43_31; GH43_32; GH43_33; GH43_34; GH43_3; GH43_4; GH43_5; GH43_6; GH43_7; GH43_8; GH43_9	GH43 beta-xylosidase (EC 3.2.1.37); alpha-L-arabinofuranosidase (EC 3.2.1.55); xylanase (EC 3.2.1.8); alpha-1,2-L-arabinofuranosidase (EC 3.2.1.-); exo-alpha-1,5-L-arabinofuranosidase (EC 3.2.1.-); [inverting] exo-alpha-1,5-L-arabinanase (EC 3.2.1.-); beta-1,3-xylosidase (EC 3.2.1.72); [inverting] exo-alpha-1,5-L-arabinanase (EC 3.2.1.-); [inverting] endo-alpha-1,5-L-arabinanase (EC 3.2.1.99); ex…	3.2.1.55; 3.2.1.37,3.2.1.55; 3.2.1.37,3.2.1.72,3.2.1.55; 3.2.1.37,3.2.1.55; 3.2.1.37,3.2.1.-,3.2.1.55; 3.2.1.146; 3.2.1.146; 3.2.1.146; 3.2.1.146; 3.2.1.55; 3.2.1.146,3.2.1.55,3.2.1.-; 3.2.1.99,3.2.1.-; 3.2.1.-,3.2.1.99; 3.2.1.99; 3.2.1.8; 3.2.1.146; 3.2.1.55	GH43_3.hmm	0
ENBDON_00521_gene	SARSHI1M.gff3_genome	D										MDMPI C-terminal domain [PF07398.14]; Mycothiol maleylpyruvate isomerase N-terminal domain [PF11716.11]					0
ENBDON_00522_gene	SARSHI1M.gff3_genome	C	K25286	iron-siderophore transport system substrate-binding protein								Periplasmic binding protein [PF01497.21]					0
ENBDON_00524_gene	SARSHI1M.gff3_genome	C	K07098	uncharacterized protein								Calcineurin-like phosphoesterase superfamily domain [PF12850.10]; Calcineurin-like phosphoesterase [PF00149.31]					0
ENBDON_00525_gene	SARSHI1M.gff3_genome	C	K09117	uncharacterized protein								Yqey-like protein [PF09424.13]					0
ENBDON_00526_gene	SARSHI1M.gff3_genome	D										Transglycosylase [PF00912.25]; Penicillin binding protein transpeptidase domain [PF00905.25]; PASTA domain [PF03793.22]	GT51	GT51 murein polymerase (EC 2.4.1.129).	2.4.1.129	GT51.hmm	0
ENBDON_00527_gene	SARSHI1M.gff3_genome	C	K18955	WhiB family transcriptional regulator, redox-sensing transcriptional regulator								Transcription factor WhiB [PF02467.19]					0
ENBDON_00528_gene	SARSHI1M.gff3_genome	C	K01551	arsenite/tail-anchored protein-transporting ATPase [EC:7.3.2.7 7.3.-.-]								Anion-transporting ATPase [PF02374.18]; AAA domain [PF13614.9]; SRP54-type protein, GTPase domain [PF00448.25]; NUBPL iron-transfer P-loop NTPase [PF10609.12]; AAA domain [PF13604.9]; CobQ/CobB/MinD/ParA nucleotide binding domain [PF01656.26]					0
ENBDON_00529_gene	SARSHI1M.gff3_genome	C	K01551	arsenite/tail-anchored protein-transporting ATPase [EC:7.3.2.7 7.3.-.-]								Anion-transporting ATPase [PF02374.18]; AAA domain [PF13614.9]; ATPase MipZ [PF09140.14]; NUBPL iron-transfer P-loop NTPase [PF10609.12]; Cellulose biosynthesis protein BcsQ [PF06564.15]; CobQ/CobB/MinD/ParA nucleotide binding domain [PF01656.26]; VirC1 protein [PF07015.14]					0
ENBDON_00530_gene	SARSHI1M.gff3_genome	D										Domain of unknown function (DUF4177) [PF13783.9]					0
ENBDON_00531_gene	SARSHI1M.gff3_genome	D										YjgF/chorismate_mutase-like, putative endoribonuclease [PF14588.9]; Endoribonuclease L-PSP [PF01042.24]					0
ENBDON_00532_gene	SARSHI1M.gff3_genome	D										Metallo-beta-lactamase superfamily [PF00753.30]; Beta-lactamase associated winged helix domain [PF17778.4]					0
ENBDON_00533_gene	SARSHI1M.gff3_genome	C	K10914	CRP/FNR family transcriptional regulator, cyclic AMP receptor protein								Cyclic nucleotide-binding domain [PF00027.32]; Crp-like helix-turn-helix domain [PF13545.9]					0
ENBDON_00534_gene	SARSHI1M.gff3_genome	E															0
ENBDON_00535_gene	SARSHI1M.gff3_genome	C	K10773	endonuclease III [EC:4.2.99.18]								HhH-GPD superfamily base excision DNA repair protein [PF00730.28]; Helix-hairpin-helix motif [PF00633.26]					0
ENBDON_00536_gene	SARSHI1M.gff3_genome	D										Redoxin [PF08534.13]; AhpC/TSA family [PF00578.24]; Thioredoxin-like [PF13905.9]					0
ENBDON_00537_gene	SARSHI1M.gff3_genome	D										NUDIX domain [PF00293.31]					0
ENBDON_00538_gene	SARSHI1M.gff3_genome	C	K03558	membrane protein required for colicin V production	MER0960214	S01B	MER0960214 - subfamily S1B non-peptidase homologues (Rhodococcus ruber) [S01.UNB]#S01B#{peptidase unit: 219-357}~source A0A098BS10~	FALSE	0.909	266	1.346e-76	Trypsin-like peptidase domain [PF13365.9]; Colicin V production protein [PF02674.19]					0
ENBDON_00539_gene	SARSHI1M.gff3_genome	D			MER0226865	S33	MER0226865 - family S33 non-peptidase homologues (Rhodococcus equi) [S33.UNW]#S33#{peptidase unit: 8-299}~source YP_004005331~	TRUE	0.782	468	7.599e-148	alpha/beta hydrolase fold [PF00561.23]; Serine aminopeptidase, S33 [PF12146.11]; Alpha/beta hydrolase family [PF12697.10]; Alpha/beta hydrolase of unknown function (DUF1057) [PF06342.15]					0
ENBDON_00540_gene	SARSHI1M.gff3_genome	D										Putative Actinobacterial Holin-X, holin superfamily III [PF07332.14]					0
ENBDON_00541_gene	SARSHI1M.gff3_genome	C	K03313	Na+:H+ antiporter, NhaA family								Na+/H+ antiporter 1 [PF06965.15]					0
ENBDON_00542_gene	SARSHI1M.gff3_genome	D			MER0011529	M20X	MER0011529 - family M20 unassigned peptidases (Campylobacter jejuni) [M20.UPW]#M20X#{peptidase unit: 1-415}~source Q9S3L1~	FALSE	0.26	151	7.164e-37	Sugar (and other) transporter [PF00083.27]; Major Facilitator Superfamily [PF07690.19]					0
ENBDON_00543_gene	SARSHI1M.gff3_genome	C	K01895	acetyl-CoA synthetase [EC:6.2.1.1]								AMP-binding enzyme [PF00501.31]; Acetyl-coenzyme A synthetase N-terminus [PF16177.8]; AMP-binding enzyme C-terminal domain [PF13193.9]					0
ENBDON_00544_gene	SARSHI1M.gff3_genome	E															0
ENBDON_00546_gene	SARSHI1M.gff3_genome	D										haloacid dehalogenase-like hydrolase [PF12710.10]					0
ENBDON_00547_gene	SARSHI1M.gff3_genome	D										Cellulose biosynthesis protein BcsQ [PF06564.15]; AAA domain [PF13614.9]					0
ENBDON_00548_gene	SARSHI1M.gff3_genome	C	K02283	pilus assembly protein CpaF [EC:7.4.2.8]								Type II/IV secretion system protein [PF00437.23]					0
ENBDON_00549_gene	SARSHI1M.gff3_genome	C	K12510	tight adherence protein B													0
ENBDON_00550_gene	SARSHI1M.gff3_genome	E															0
ENBDON_00551_gene	SARSHI1M.gff3_genome	D										Protein of unknown function (DUF4244) [PF14029.9]					0
ENBDON_00552_gene	SARSHI1M.gff3_genome	E															0
ENBDON_00553_gene	SARSHI1M.gff3_genome	E															0
ENBDON_00554_gene	SARSHI1M.gff3_genome	C	K06877	DEAD/DEAH box helicase domain-containing protein								MrfA Zn-binding domain [PF09369.13]; DEAD/DEAH box helicase [PF00270.32]; Helicase conserved C-terminal domain [PF00271.34]; UvrD/REP helicase N-terminal domain [PF00580.24]					0
ENBDON_00555_gene	SARSHI1M.gff3_genome	C	K03704	cold shock protein								'Cold-shock' DNA-binding domain [PF00313.25]					0
ENBDON_00556_gene	SARSHI1M.gff3_genome	E															0
ENBDON_00557_gene	SARSHI1M.gff3_genome	C	K03168	DNA topoisomerase I [EC:5.6.2.1]								DNA topoisomerase [PF01131.23]; Toprim domain [PF01751.25]; Topoisomerase C-terminal repeat [PF13368.9]					0
ENBDON_00558_gene	SARSHI1M.gff3_genome	D										Helix-turn-helix domain [PF12833.10]; Domain of unknown function (DUF6597) [PF20240.1]					0
ENBDON_00559_gene	SARSHI1M.gff3_genome	D										Glyoxalase-like domain [PF12681.10]; Glyoxalase/Bleomycin resistance protein/Dioxygenase superfamily [PF00903.28]; Glyoxalase-like domain [PF18029.4]					0
ENBDON_00560_gene	SARSHI1M.gff3_genome	C	K02341	DNA polymerase III subunit delta' [EC:2.7.7.7]								DNA polymerase III, delta subunit [PF13177.9]; DNA polymerase III, delta subunit, C terminal [PF09115.13]					1
ENBDON_00562_gene	SARSHI1M.gff3_genome	E															0
ENBDON_00563_gene	SARSHI1M.gff3_genome	E															0
ENBDON_00567_gene	SARSHI1M.gff3_genome	E															0
ENBDON_00568_gene	SARSHI1M.gff3_genome	D										FCD domain [PF07729.15]; Bacterial regulatory proteins, gntR family [PF00392.24]					0
ENBDON_00569_gene	SARSHI1M.gff3_genome	D										Major Facilitator Superfamily [PF07690.19]; Sugar (and other) transporter [PF00083.27]					0
ENBDON_00570_gene	SARSHI1M.gff3_genome	D			MER0812159	M01	MER0812159 - family M1 unassigned peptidases (Rhodococcus sp. EsD8) [M01.UPW]#M01#{peptidase unit: 225-424}~source N1LWI0~	TRUE	0.968	406	2.017e-123	Peptidase family M1 domain [PF01433.23]; Peptidase M1 N-terminal domain [PF17900.4]					0
ENBDON_00571_gene	SARSHI1M.gff3_genome	D										AMP-binding enzyme [PF00501.31]; Phosphopantetheine attachment site [PF00550.28]; AMP-binding enzyme C-terminal domain [PF13193.9]					0
ENBDON_00572_gene	SARSHI1M.gff3_genome	D										Aminotransferase class-V [PF00266.22]					0
ENBDON_00573_gene	SARSHI1M.gff3_genome	D										Aminoacyl-tRNA editing domain [PF04073.18]					0
ENBDON_00574_gene	SARSHI1M.gff3_genome	C	K16840	2-oxo-4-hydroxy-4-carboxy-5-ureidoimidazoline decarboxylase [EC:4.1.1.97]								OHCU decarboxylase [PF09349.13]					0
ENBDON_00575_gene	SARSHI1M.gff3_genome	C	K01692	enoyl-CoA hydratase [EC:4.2.1.17]	MER1073108	S49C	MER1073108 - subfamily S49C non-peptidase homologues (Deferribacter desulfuricans) [S49.UNC]#S49C#{peptidase unit: 109-219}~source D3P9A0~	FALSE	0.42	83	4.157e-16	Enoyl-CoA hydratase/isomerase [PF00378.23]; Enoyl-CoA hydratase/isomerase [PF16113.8]					0
ENBDON_00576_gene	SARSHI1M.gff3_genome	E															0
ENBDON_00577_gene	SARSHI1M.gff3_genome	E															0
ENBDON_00578_gene	SARSHI1M.gff3_genome	C	K01507	inorganic pyrophosphatase [EC:3.6.1.1]								Inorganic pyrophosphatase [PF00719.22]; Inorganic Pyrophosphatase [PF18823.4]					0
ENBDON_00579_gene	SARSHI1M.gff3_genome	C	K07259	serine-type D-Ala-D-Ala carboxypeptidase/endopeptidase (penicillin-binding protein 4) [EC:3.4.16.4 3.4.21.-]	MER0337966	S13	MER0337966 - family S13 unassigned peptidases (Rhodococcus ruber) [S13.UPW]#S13#{peptidase unit: 86-462}~source ZP_22888000~	TRUE	0.909	717	3.944e-231	D-Ala-D-Ala carboxypeptidase 3 (S13) family [PF02113.18]; D-alanyl-D-alanine carboxypeptidase [PF00768.23]					0
ENBDON_00580_gene	SARSHI1M.gff3_genome	D										Zincin-like metallopeptidase [PF10103.12]					0
ENBDON_00581_gene	SARSHI1M.gff3_genome	C	K04075	tRNA(Ile)-lysidine synthase [EC:6.3.4.19]								PP-loop family [PF01171.23]; TilS substrate binding domain [PF09179.14]					0
ENBDON_00582_gene	SARSHI1M.gff3_genome	C	K00760	hypoxanthine phosphoribosyltransferase [EC:2.4.2.8]								Phosphoribosyl transferase domain [PF00156.30]					0
ENBDON_00583_gene	SARSHI1M.gff3_genome	D										Protein kinase domain [PF00069.28]; Protein tyrosine and serine/threonine kinase [PF07714.20]; Kinase-like [PF14531.9]					0
ENBDON_00584_gene	SARSHI1M.gff3_genome	C	K03798	cell division protease FtsH [EC:3.4.24.-]	MER0174014	M41	MER0174014 - Mername-AA223 peptidase (Rhodococcus opacus) [M41.015]#M41#{peptidase unit: 376-649}~source BAH52570~	TRUE	0.893	506	6.261e-153	Peptidase family M41 [PF01434.21]; ATPase family associated with various cellular activities (AAA) [PF00004.32]; Holliday junction DNA helicase RuvB P-loop domain [PF05496.15]; AAA domain (dynein-related subfamily) [PF07728.17]; Bacterial dnaA protein [PF00308.21]; AAA+ lid domain [PF17862.4]; AAA domain (Cdc48 subfamily) [PF07724.17]; TIP49 P-loop domain [PF06068.16]; Sigma-54 interaction domain…					0
ENBDON_00585_gene	SARSHI1M.gff3_genome	C	K01495	GTP cyclohydrolase IA [EC:3.5.4.16]								GTP cyclohydrolase I [PF01227.25]					0
ENBDON_00586_gene	SARSHI1M.gff3_genome	C	K00796	dihydropteroate synthase [EC:2.5.1.15]								Pterin binding enzyme [PF00809.25]					0
ENBDON_00587_gene	SARSHI1M.gff3_genome	C	K01633	7,8-dihydroneopterin aldolase/epimerase/oxygenase [EC:4.1.2.25 5.1.99.8 1.13.11.81]								Dihydroneopterin aldolase [PF02152.21]					0
ENBDON_00588_gene	SARSHI1M.gff3_genome	C	K00950	2-amino-4-hydroxy-6-hydroxymethyldihydropteridine diphosphokinase [EC:2.7.6.3]								7,8-dihydro-6-hydroxymethylpterin-pyrophosphokinase (HPPK) [PF01288.23]					0
ENBDON_00589_gene	SARSHI1M.gff3_genome	D										Protein of unknown function (DUF3180) [PF11377.11]					0
ENBDON_00590_gene	SARSHI1M.gff3_genome	D										Domain of unknown function (DUF6779) [PF20570.1]					0
ENBDON_00591_gene	SARSHI1M.gff3_genome	D										Rossmann-like domain [PF10727.12]; Domain of unknown function (DUF2520) [PF10728.12]					0
ENBDON_00592_gene	SARSHI1M.gff3_genome	C	K01918	pantoate--beta-alanine ligase [EC:6.3.2.1]								Pantoate-beta-alanine ligase [PF02569.18]					0
ENBDON_00593_gene	SARSHI1M.gff3_genome	C	K01579	aspartate 1-decarboxylase [EC:4.1.1.11]								Aspartate decarboxylase [PF02261.19]					0
ENBDON_00594_gene	SARSHI1M.gff3_genome	C	K03525	type III pantothenate kinase [EC:2.7.1.33]								Type III pantothenate kinase [PF03309.17]					0
ENBDON_00595_gene	SARSHI1M.gff3_genome	D										Rhodanese-like domain [PF00581.23]					0
ENBDON_00596_gene	SARSHI1M.gff3_genome	C	K04567	lysyl-tRNA synthetase, class II [EC:6.1.1.6]								tRNA synthetases class II (D, K and N) [PF00152.23]					0
ENBDON_00597_gene	SARSHI1M.gff3_genome	D										Lsr2 [PF11774.11]					0
ENBDON_00598_gene	SARSHI1M.gff3_genome	C	K01115	phospholipase D1/2 [EC:3.1.4.4]								PLD-like domain [PF13091.9]					0
ENBDON_00599_gene	SARSHI1M.gff3_genome	C	K03696	ATP-dependent Clp protease ATP-binding subunit ClpC								AAA domain (Cdc48 subfamily) [PF07724.17]; AAA lid domain [PF17871.4]; C-terminal, D2-small domain, of ClpB protein [PF10431.12]; AAA domain (dynein-related subfamily) [PF07728.17]; Clp amino terminal domain, pathogenicity island component [PF02861.23]; ATPase family associated with various cellular activities (AAA) [PF00004.32]; Bacterial TniB protein [PF05621.14]; DNA polymerase III, delta subu…					0
ENBDON_00600_gene	SARSHI1M.gff3_genome	D										Mycothiol maleylpyruvate isomerase N-terminal domain [PF11716.11]					0
ENBDON_00601_gene	SARSHI1M.gff3_genome	D										WYL domain [PF13280.9]; HTH domain [PF08279.15]					0
ENBDON_00602_gene	SARSHI1M.gff3_genome	D										GlcNAc-PI de-N-acetylase [PF02585.20]	CE14	CE14 N-acetyl-1-D-myo-inosityl-2-amino-2-deoxy-alpha-D-glucopyranoside deacetylase (EC 3.5.1.89); diacetylchitobiose deacetylase (EC 3.5.1.-); mycothiol S-conjugate amidase (EC 3.5.1.-)	3.5.1.105,3.5.1.115,3.5.1.89,3.5.1.-	CE14.hmm	0
ENBDON_00603_gene	SARSHI1M.gff3_genome	D										Acyl-CoA dehydrogenase, C-terminal domain [PF08028.14]; Acyl-CoA dehydrogenase, C-terminal domain [PF00441.27]; Acyl-CoA dehydrogenase, middle domain [PF02770.22]; Acyl-CoA dehydrogenase, N-terminal domain [PF02771.19]					0
ENBDON_00604_gene	SARSHI1M.gff3_genome	C	K22894	SARP family transcriptional regulator, regulator of embCAB operon								Bacterial transcriptional activator domain [PF03704.20]; NB-ARC domain [PF00931.25]; Transcriptional regulatory protein, C terminal [PF00486.31]					0
ENBDON_00605_gene	SARSHI1M.gff3_genome	D										YrhK-like protein [PF14145.9]					0
ENBDON_00606_gene	SARSHI1M.gff3_genome	C	K04063	lipoyl-dependent peroxiredoxin [EC:1.11.1.28]								OsmC-like protein [PF02566.22]					0
ENBDON_00607_gene	SARSHI1M.gff3_genome	D										Domain of unknown function (DUF1990) [PF09348.13]					0
ENBDON_00608_gene	SARSHI1M.gff3_genome	C	K21481	heme oxygenase (mycobilin-producing) [EC:1.14.99.57]								Antibiotic biosynthesis monooxygenase [PF03992.19]					0
ENBDON_00609_gene	SARSHI1M.gff3_genome	D			MER0174015	S33	MER0174015 - family S33 unassigned peptidases (Rhodococcus opacus) [S33.UPW]#S33#{peptidase unit: 11-248}~source BAH52600~	TRUE	0.804	394	1.395e-123	Serine aminopeptidase, S33 [PF12146.11]; Alpha/beta hydrolase family [PF12697.10]; alpha/beta hydrolase fold [PF00561.23]; Lipase (class 2) [PF01674.21]; TAP-like protein [PF08386.13]; Alpha/beta hydrolase of unknown function (DUF1057) [PF06342.15]; X-Pro dipeptidyl-peptidase (S15 family) [PF02129.21]; PGAP1-like protein [PF07819.16]; Thioesterase domain [PF00975.23]					0
ENBDON_00610_gene	SARSHI1M.gff3_genome	C	K03575	A/G-specific adenine glycosylase [EC:3.2.2.31]								HhH-GPD superfamily base excision DNA repair protein [PF00730.28]; Helix-hairpin-helix motif [PF00633.26]					0
ENBDON_00611_gene	SARSHI1M.gff3_genome	C	K01673	carbonic anhydrase [EC:4.2.1.1]								Carbonic anhydrase [PF00484.22]					0
ENBDON_00612_gene	SARSHI1M.gff3_genome	E															0
ENBDON_00613_gene	SARSHI1M.gff3_genome	C	K07067	diadenylate cyclase [EC:2.7.7.85]								DisA bacterial checkpoint controller linker region [PF10635.12]; DisA bacterial checkpoint controller nucleotide-binding [PF02457.19]					0
ENBDON_00614_gene	SARSHI1M.gff3_genome	D										Thioesterase superfamily [PF03061.25]					0
ENBDON_00615_gene	SARSHI1M.gff3_genome	C	K02346	DNA polymerase IV [EC:2.7.7.7]								impB/mucB/samB family [PF00817.23]; impB/mucB/samB family C-terminal domain [PF11799.11]; IMS family HHH motif [PF11798.11]					0
ENBDON_00616_gene	SARSHI1M.gff3_genome	C	K04485	DNA repair protein RadA/Sms	MER1030965	S16	MER1030965 - family S16 non-peptidase homologues (Rhodococcus aetherivorans) [S16.UNW]#S16#{peptidase unit: 210-437}~source A0A059MTR4~	TRUE	0.913	437	3.477e-134	KaiC [PF06745.16]; Subunit ChlI of Mg-chelatase [PF13541.9]; AAA domain [PF13481.9]; DnaB-like helicase C terminal domain [PF03796.18]; Rubredoxin metal binding domain [PF18073.4]; Rad51 [PF08423.14]; Lon protease (S16) C-terminal proteolytic domain [PF05362.16]					0
ENBDON_00617_gene	SARSHI1M.gff3_genome	C	K09796	periplasmic copper chaperone A													0
ENBDON_00618_gene	SARSHI1M.gff3_genome	C	K07736	CarD family transcriptional regulator, regulator of rRNA transcription								CarD-like/TRCF domain [PF02559.19]					0
ENBDON_00619_gene	SARSHI1M.gff3_genome	C	K00991	2-C-methyl-D-erythritol 4-phosphate cytidylyltransferase [EC:2.7.7.60]								2-C-methyl-D-erythritol 4-phosphate cytidylyltransferase [PF01128.22]; MobA-like NTP transferase domain [PF12804.10]; Nucleotidyl transferase [PF00483.26]					0
ENBDON_00620_gene	SARSHI1M.gff3_genome	D										YgbB family [PF02542.19]					0
ENBDON_00621_gene	SARSHI1M.gff3_genome	C	K01883	cysteinyl-tRNA synthetase [EC:6.1.1.16]								tRNA synthetases class I (C) catalytic domain [PF01406.22]; tRNA synthetases class I (M) [PF09334.14]; DALR domain [PF09190.14]; tRNA synthetases class I (I, L, M and V) [PF00133.25]					0
ENBDON_00622_gene	SARSHI1M.gff3_genome	C	K03218	23S rRNA (guanosine2251-2'-O)-methyltransferase [EC:2.1.1.185]								SpoU rRNA Methylase family [PF00588.22]; RNA 2'-O ribose methyltransferase substrate binding [PF08032.15]					0
ENBDON_00623_gene	SARSHI1M.gff3_genome	E															0
ENBDON_00624_gene	SARSHI1M.gff3_genome	D										Carboxyltransferase domain, subdomain A and B [PF02626.18]					0
ENBDON_00625_gene	SARSHI1M.gff3_genome	D										GDSL-like Lipase/Acylhydrolase family [PF13472.9]					0
ENBDON_00626_gene	SARSHI1M.gff3_genome	D										Tetracyclin repressor-like, C-terminal domain [PF16925.8]					0
ENBDON_00627_gene	SARSHI1M.gff3_genome	C	K06994	putative drug exporter of the RND superfamily								MMPL family [PF03176.18]					0
ENBDON_00628_gene	SARSHI1M.gff3_genome	E															0
ENBDON_00629_gene	SARSHI1M.gff3_genome	E															0
ENBDON_00630_gene	SARSHI1M.gff3_genome	D										Male sterility protein [PF07993.15]; NAD dependent epimerase/dehydratase family [PF01370.24]; RmlD substrate binding domain [PF04321.20]; GDP-mannose 4,6 dehydratase [PF16363.8]; 3-beta hydroxysteroid dehydrogenase/isomerase family [PF01073.22]; NAD(P)H-binding [PF13460.9]					0
ENBDON_00631_gene	SARSHI1M.gff3_genome	C	K09251	putrescine aminotransferase [EC:2.6.1.82]								Aminotransferase class-III [PF00202.24]					0
ENBDON_00632_gene	SARSHI1M.gff3_genome	D										Polyketide cyclase / dehydrase and lipid transport [PF03364.23]					0
ENBDON_00633_gene	SARSHI1M.gff3_genome	D										Phosphatidylglycerol lysyltransferase, C-terminal [PF09924.12]					0
ENBDON_00634_gene	SARSHI1M.gff3_genome	D										FAD dependent oxidoreductase [PF01266.27]; FAD binding domain [PF00890.27]					0
ENBDON_00635_gene	SARSHI1M.gff3_genome	D										FAD binding domain [PF01494.22]; Tryptophan halogenase [PF04820.17]; FAD binding domain [PF00890.27]; FAD dependent oxidoreductase [PF12831.10]; FAD dependent oxidoreductase [PF01266.27]					0
ENBDON_00636_gene	SARSHI1M.gff3_genome	D			MER0041257	S33	MER0041257 - family S33 non-peptidase homologues (Nocardia farcinica) [S33.UNW]#S33#{peptidase unit: 1-288}~source YP_117659-1~	FALSE	0.476	241	1.408e-69	alpha/beta hydrolase fold [PF00561.23]; Serine aminopeptidase, S33 [PF12146.11]; Alpha/beta hydrolase family [PF12697.10]					0
ENBDON_00637_gene	SARSHI1M.gff3_genome	D			MER0041257	S33	MER0041257 - family S33 non-peptidase homologues (Nocardia farcinica) [S33.UNW]#S33#{peptidase unit: 1-288}~source YP_117659-1~	FALSE	0.461	235	2.563e-67	alpha/beta hydrolase fold [PF00561.23]; Serine aminopeptidase, S33 [PF12146.11]; Alpha/beta hydrolase family [PF12697.10]					0
ENBDON_00638_gene	SARSHI1M.gff3_genome	C	K14257	tetracycline 7-halogenase / FADH2 O2-dependent halogenase [EC:1.14.19.49 1.14.19.-]								Tryptophan halogenase [PF04820.17]; FAD binding domain [PF01494.22]; FAD dependent oxidoreductase [PF01266.27]; Lycopene cyclase protein [PF05834.15]; NAD-dependent glycerol-3-phosphate dehydrogenase N-terminus [PF01210.26]; Pyridine nucleotide-disulphide oxidoreductase [PF07992.17]					0
ENBDON_00639_gene	SARSHI1M.gff3_genome	C	K03455	monovalent cation:H+ antiporter-2, CPA2 family								Sodium/hydrogen exchanger family [PF00999.24]					0
ENBDON_00640_gene	SARSHI1M.gff3_genome	C	K24241	cytochrome P450 family 135 [EC:1.14.-.-]								Cytochrome P450 [PF00067.25]					0
ENBDON_00641_gene	SARSHI1M.gff3_genome	D										short chain dehydrogenase [PF00106.28]; Enoyl-(Acyl carrier protein) reductase [PF13561.9]; KR domain [PF08659.13]					0
ENBDON_00642_gene	SARSHI1M.gff3_genome	C	K10215	monooxygenase [EC:1.14.13.-]								Flavin-binding monooxygenase-like [PF00743.22]; L-lysine 6-monooxygenase/L-ornithine 5-monooxygenase [PF13434.9]; Pyridine nucleotide-disulphide oxidoreductase [PF07992.17]; NAD(P)-binding Rossmann-like domain [PF13450.9]					0
ENBDON_00643_gene	SARSHI1M.gff3_genome	D										Major Facilitator Superfamily [PF07690.19]; Sugar (and other) transporter [PF00083.27]; Fungal trichothecene efflux pump (TRI12) [PF06609.16]					0
ENBDON_00644_gene	SARSHI1M.gff3_genome	C	K08217	MFS transporter, DHA3 family, macrolide efflux protein								Transmembrane secretion effector [PF05977.16]; Major Facilitator Superfamily [PF07690.19]; Sugar (and other) transporter [PF00083.27]					0
ENBDON_00645_gene	SARSHI1M.gff3_genome	C	K01469	5-oxoprolinase (ATP-hydrolysing) [EC:3.5.2.9]								Hydantoinase B/oxoprolinase [PF02538.17]; Hydantoinase/oxoprolinase [PF01968.21]; Hydantoinase/oxoprolinase N-terminal region [PF05378.16]; Hydantoinase/oxoprolinase C-terminal domain [PF19278.2]					0
ENBDON_00646_gene	SARSHI1M.gff3_genome	C	K02075	zinc/manganese transport system permease protein								ABC 3 transport family [PF00950.20]					0
ENBDON_00647_gene	SARSHI1M.gff3_genome	C	K02074	zinc/manganese transport system ATP-binding protein								ABC transporter [PF00005.30]					0
ENBDON_00648_gene	SARSHI1M.gff3_genome	C	K02077	zinc/manganese transport system substrate-binding protein								Zinc-uptake complex component A periplasmic [PF01297.20]					0
ENBDON_00649_gene	SARSHI1M.gff3_genome	D										Periplasmic binding proteins and sugar binding domain of LacI family [PF00532.24]; Periplasmic binding protein-like domain [PF13377.9]; Bacterial regulatory proteins, lacI family [PF00356.24]					0
ENBDON_00650_gene	SARSHI1M.gff3_genome	C	K01087	trehalose 6-phosphate phosphatase [EC:3.1.3.12]	MER0500276	I04	MER0500276 - family I4 unassigned peptidase inhibitors (Sulfolobus acidocaldarius) [I04.UPW]#I04#{inhibitor unit: 297-462}~source YP_007436604~	FALSE	0.309	79	3.323e-13	Glycosyl hydrolases family 15 [PF00723.24]; Trehalose-phosphatase [PF02358.19]; Trehalase-like, N-terminal [PF19291.2]	GH15	GH15 glucoamylase (EC 3.2.1.3); glucodextranase (EC 3.2.1.70); alpha,alpha-trehalase (EC 3.2.1.28); dextran dextrinase (EC 2.4.1.2)	3.2.1.205,3.2.1.28,3.2.1.3,3.2.1.70	GH15.hmm	0
ENBDON_00651_gene	SARSHI1M.gff3_genome	C	K22107	TetR/AcrR family transcriptional regulator, cholesterol catabolism regulator								Tetracyclin repressor-like, C-terminal domain [PF17925.4]; Bacterial regulatory proteins, tetR family [PF00440.26]					0
ENBDON_00652_gene	SARSHI1M.gff3_genome	C	K22820	3-oxochol-4-en-24-oyl-CoA dehydrogenase [EC:1.3.99.-]								Acyl-CoA dehydrogenase, middle domain [PF02770.22]; Acyl-CoA dehydrogenase, C-terminal domain [PF00441.27]; Acyl-CoA dehydrogenase, N-terminal domain [PF02771.19]					0
ENBDON_00653_gene	SARSHI1M.gff3_genome	C	K22821	3-oxo-4-pregnene-20-carboxyl-CoA dehydrogenase alpha subunit [EC:1.3.99.-]								Acyl-CoA dehydrogenase, N-terminal domain [PF02771.19]; Acyl-CoA dehydrogenase, C-terminal domain [PF00441.27]					0
ENBDON_00654_gene	SARSHI1M.gff3_genome	C	K22822	3-oxo-4-pregnene-20-carboxyl-CoA dehydrogenase beta subunit [EC:1.3.99.-]								Acyl-CoA dehydrogenase, middle domain [PF02770.22]; Acyl-CoA dehydrogenase, N-terminal domain [PF02771.19]; Acyl-CoA dehydrogenase, C-terminal domain [PF00441.27]					0
ENBDON_00655_gene	SARSHI1M.gff3_genome	C	K25621	3-oxo-4,17-pregnadiene-20-carboxyl-CoA hydratase alpha subunit [EC:4.2.1.-]								N-terminal half of MaoC dehydratase [PF13452.9]; DUF35 OB-fold domain, acyl-CoA-associated [PF01796.20]					0
ENBDON_00656_gene	SARSHI1M.gff3_genome	C	K25622	3-oxo-4,17-pregnadiene-20-carboxyl-CoA hydratase beta subunit [EC:4.2.1.-]								MaoC like domain [PF01575.22]					0
ENBDON_00657_gene	SARSHI1M.gff3_genome	C	K25623	17-hydroxy-3-oxo-4-pregnene-20-carboxyl-CoA lyase [EC:4.1.3.-]								Thiolase, N-terminal domain [PF00108.26]; Thiolase, C-terminal domain [PF02803.21]					0
ENBDON_00658_gene	SARSHI1M.gff3_genome	D										Tetracyclin repressor-like, C-terminal domain [PF19352.2]; Bacterial regulatory proteins, tetR family [PF00440.26]					0
ENBDON_00659_gene	SARSHI1M.gff3_genome	D										short chain dehydrogenase [PF00106.28]; Enoyl-(Acyl carrier protein) reductase [PF13561.9]; KR domain [PF08659.13]					0
ENBDON_00660_gene	SARSHI1M.gff3_genome	C	K01990	ABC-2 type transport system ATP-binding protein								ABC transporter [PF00005.30]; Domain of unknown function (DUF4162) [PF13732.9]; AAA domain, putative AbiEii toxin, Type IV TA system [PF13304.9]					0
ENBDON_00661_gene	SARSHI1M.gff3_genome	D										ABC-2 type transporter [PF01061.27]					0
ENBDON_00662_gene	SARSHI1M.gff3_genome	C	K01087	trehalose 6-phosphate phosphatase [EC:3.1.3.12]								Glycosyl hydrolase family 65 central catalytic domain [PF03632.18]; Glycosyl hydrolase family 65, N-terminal domain [PF03636.18]; Trehalose-phosphatase [PF02358.19]; Haloacid dehalogenase-like hydrolase [PF13419.9]; haloacid dehalogenase-like hydrolase [PF00702.29]; Glycosyl hydrolase family 65, C-terminal domain [PF03633.18]	GH65	GH65 alpha,alpha-trehalase (EC 3.2.1.28); maltose phosphorylase (EC 2.4.1.8); trehalose phosphorylase (EC 2.4.1.64); kojibiose phosphorylase (EC 2.4.1.230); trehalose-6-phosphate phosphorylase (EC 2.4.1.216); nigerose phosphorylase (EC 2.4.1.279); 3-O-alpha-glucopyranosyl-L-rhamnose phosphorylase (EC 2.4.1.282); 1,2-alpha-glucosylglycerol phosphorylase (EC 2.4.1.332); alpha-glucosyl-1,2-beta-gala…	2.4.1.216,2.4.1.230,2.4.1.279,2.4.1.282,2.4.1.332,2.4.1.334,2.4.1.64,2.4.1.8,2.4.1.-,3.2.1.107,3.2.1.216,3.2.1.28	GH65.hmm	0
ENBDON_00663_gene	SARSHI1M.gff3_genome	D										Putative transmembrane protein (PGPGW) [PF09656.13]					0
ENBDON_00664_gene	SARSHI1M.gff3_genome	E															0
ENBDON_00665_gene	SARSHI1M.gff3_genome	C	K07001	NTE family protein								Patatin-like phospholipase [PF01734.25]					0
ENBDON_00666_gene	SARSHI1M.gff3_genome	D										Domain of unknown function (DUF5914) [PF19299.2]; Rieske [2Fe-2S] domain [PF00355.29]					0
ENBDON_00667_gene	SARSHI1M.gff3_genome	C	K09879	carotenoid phi-ring synthase / carotenoid chi-ring synthase [EC:1.3.99.39 1.3.99.40]								Flavin containing amine oxidoreductase [PF01593.27]; NAD(P)-binding Rossmann-like domain [PF13450.9]; FAD binding domain [PF01494.22]; Pyridine nucleotide-disulphide oxidoreductase [PF07992.17]; Flavin-binding monooxygenase-like [PF00743.22]; HI0933-like protein [PF03486.17]; FAD dependent oxidoreductase [PF12831.10]; FAD binding domain [PF00890.27]					0
ENBDON_00668_gene	SARSHI1M.gff3_genome	E															0
ENBDON_00669_gene	SARSHI1M.gff3_genome	D										Protein of unknown function (DUF4038) [PF13204.9]; Putative collagen-binding domain of a collagenase [PF12904.10]	GH140	GH140 beta-1,2-apiosidase (EC 3.2.1.-)	3.2.1.-	GH140.hmm	0
ENBDON_00670_gene	SARSHI1M.gff3_genome	E															0
ENBDON_00671_gene	SARSHI1M.gff3_genome	D										Putative Actinobacterial Holin-X, holin superfamily III [PF07332.14]					0
ENBDON_00672_gene	SARSHI1M.gff3_genome	D										Protein of unknown function (DUF3618) [PF12277.11]					0
ENBDON_00673_gene	SARSHI1M.gff3_genome	E															0
ENBDON_00674_gene	SARSHI1M.gff3_genome	E															0
ENBDON_00675_gene	SARSHI1M.gff3_genome	D										ADP-ribosylglycohydrolase [PF03747.17]					0
ENBDON_00676_gene	SARSHI1M.gff3_genome	D										NADPH-dependent FMN reductase [PF03358.18]					0
ENBDON_00677_gene	SARSHI1M.gff3_genome	D										Secreted repeat of unknown function [PF03640.18]					0
ENBDON_00678_gene	SARSHI1M.gff3_genome	C	K01971	bifunctional non-homologous end joining protein LigD [EC:6.5.1.1]								ATP dependent DNA ligase domain [PF01068.24]; ATP dependent DNA ligase C terminal region [PF04679.18]					0
ENBDON_00679_gene	SARSHI1M.gff3_genome	C	K08172	MFS transporter, MHS family, shikimate and dehydroshikimate transport protein	MER0011529	M20X	MER0011529 - family M20 unassigned peptidases (Campylobacter jejuni) [M20.UPW]#M20X#{peptidase unit: 1-415}~source Q9S3L1~	FALSE	0.243	120	1.003e-26	Sugar (and other) transporter [PF00083.27]; Major Facilitator Superfamily [PF07690.19]; MFS/sugar transport protein [PF13347.9]					0
ENBDON_00680_gene	SARSHI1M.gff3_genome	C	K02624	IclR family transcriptional regulator, pca regulon regulatory protein								Bacterial transcriptional regulator [PF01614.21]; IclR helix-turn-helix domain [PF09339.13]					0
ENBDON_00681_gene	SARSHI1M.gff3_genome	D										AMP-binding enzyme [PF00501.31]					0
ENBDON_00682_gene	SARSHI1M.gff3_genome	D										Cholesterol oxidase, substrate-binding [PF09129.14]; FAD binding domain [PF01565.26]; D-arabinono-1,4-lactone oxidase [PF04030.17]					0
ENBDON_00683_gene	SARSHI1M.gff3_genome	D										MaoC like domain [PF01575.22]; N-terminal half of MaoC dehydratase [PF13452.9]					0
ENBDON_00684_gene	SARSHI1M.gff3_genome	C	K05898	3-oxosteroid 1-dehydrogenase [EC:1.3.99.4]								FAD binding domain [PF00890.27]; FAD dependent oxidoreductase [PF12831.10]; FAD dependent oxidoreductase [PF01266.27]; HI0933-like protein [PF03486.17]; FAD binding domain [PF01494.22]; Pyridine nucleotide-disulphide oxidoreductase [PF07992.17]					0
ENBDON_00685_gene	SARSHI1M.gff3_genome	C	K02554	2-keto-4-pentenoate hydratase [EC:4.2.1.80]								Fumarylacetoacetate (FAA) hydrolase family [PF01557.21]					0
ENBDON_00686_gene	SARSHI1M.gff3_genome	C	K04073	acetaldehyde dehydrogenase [EC:1.2.1.10]								Prokaryotic acetaldehyde dehydrogenase, dimerisation [PF09290.14]					0
ENBDON_00687_gene	SARSHI1M.gff3_genome	C	K01666	4-hydroxy 2-oxovalerate aldolase [EC:4.1.3.39]								HMGL-like [PF00682.22]; DmpG-like communication domain [PF07836.14]					0
ENBDON_00688_gene	SARSHI1M.gff3_genome	D										Family of unknown function (DUF6191) [PF19690.2]					0
ENBDON_00689_gene	SARSHI1M.gff3_genome	D										Protein of unknown function (DUF1214) [PF06742.14]; Protein of unknown function (DUF1254) [PF06863.15]					0
ENBDON_00690_gene	SARSHI1M.gff3_genome	D										Response regulator receiver domain [PF00072.27]; Bacterial regulatory proteins, luxR family [PF00196.22]; Sigma-70, region 4 [PF04545.19]					0
ENBDON_00691_gene	SARSHI1M.gff3_genome	C	K07778	two-component system, NarL family, sensor histidine kinase DesK [EC:2.7.13.3]								Histidine kinase [PF07730.16]; Histidine kinase-, DNA gyrase B-, and HSP90-like ATPase [PF02518.29]					0
ENBDON_00692_gene	SARSHI1M.gff3_genome	D										Family of unknown function (DUF6223) [PF19733.2]					0
ENBDON_00693_gene	SARSHI1M.gff3_genome	C	K08997	serine/tyrosine/threonine adenylyltransferase [EC:2.7.7.-]								Protein adenylyltransferase SelO [PF02696.17]					0
ENBDON_00694_gene	SARSHI1M.gff3_genome	D										RibD C-terminal domain [PF01872.20]					0
ENBDON_00695_gene	SARSHI1M.gff3_genome	D										Bacterial regulatory proteins, tetR family [PF00440.26]					0
ENBDON_00696_gene	SARSHI1M.gff3_genome	D										Hemerythrin HHE cation binding domain [PF01814.26]; Polyketide cyclase / dehydrase and lipid transport [PF03364.23]					0
ENBDON_00697_gene	SARSHI1M.gff3_genome	C	K00574	cyclopropane-fatty-acyl-phospholipid synthase [EC:2.1.1.79]								Mycolic acid cyclopropane synthetase [PF02353.23]; Methyltransferase domain [PF13489.9]; Methyltransferase domain [PF13649.9]; Methyltransferase domain [PF13847.9]; Methyltransferase domain [PF08241.15]; Protein-L-isoaspartate(D-aspartate) O-methyltransferase (PCMT) [PF01135.22]; Methyltransferase small domain [PF05175.17]; ubiE/COQ5 methyltransferase family [PF01209.21]; Methionine biosynthesis …					0
ENBDON_00698_gene	SARSHI1M.gff3_genome	D										Glyoxalase-like domain [PF12681.10]; Glyoxalase/Bleomycin resistance protein/Dioxygenase superfamily [PF00903.28]					0
ENBDON_00699_gene	SARSHI1M.gff3_genome	D										Lsr2 [PF11774.11]					0
ENBDON_00700_gene	SARSHI1M.gff3_genome	E															0
ENBDON_00701_gene	SARSHI1M.gff3_genome	D										Transglycosylase associated protein [PF04226.16]					0
ENBDON_00702_gene	SARSHI1M.gff3_genome	C	K01011	thiosulfate/3-mercaptopyruvate sulfurtransferase [EC:2.8.1.1 2.8.1.2]								Rhodanese-like domain [PF00581.23]					0
ENBDON_00703_gene	SARSHI1M.gff3_genome	E															0
ENBDON_00704_gene	SARSHI1M.gff3_genome	C	K07483	transposase													0
ENBDON_00705_gene	SARSHI1M.gff3_genome	E															0
ENBDON_00706_gene	SARSHI1M.gff3_genome	D										ABC-2 type transporter [PF01061.27]					0
ENBDON_00707_gene	SARSHI1M.gff3_genome	C	K01990	ABC-2 type transport system ATP-binding protein								ABC transporter [PF00005.30]; Domain of unknown function (DUF4162) [PF13732.9]					0
ENBDON_00708_gene	SARSHI1M.gff3_genome	D										6-O-methylguanine DNA methyltransferase, DNA binding domain [PF01035.23]					0
ENBDON_00709_gene	SARSHI1M.gff3_genome	E															0
ENBDON_00710_gene	SARSHI1M.gff3_genome	C	K15982	3-ketosteroid 9alpha-monooxygenase subunit A [EC:1.14.15.30]								3-Ketosteroid 9alpha-hydroxylase C-terminal domain [PF19298.2]; Rieske [2Fe-2S] domain [PF00355.29]; Rieske-like [2Fe-2S] domain [PF13806.9]					0
ENBDON_00711_gene	SARSHI1M.gff3_genome	C	K16047	3-hydroxy-9,10-secoandrosta-1,3,5(10)-triene-9,17-dione monooxygenase [EC:1.14.14.12]								Acyl-CoA dehydrogenase, C-terminal domain [PF08028.14]; Acyl-CoA dehydrogenase, middle domain [PF02770.22]; Acyl-CoA dehydrogenase, N-terminal domain [PF02771.19]					0
ENBDON_00712_gene	SARSHI1M.gff3_genome	C	K16050	4,5:9,10-diseco-3-hydroxy-5,9,17-trioxoandrosta-1(10),2-diene-4-oate hydrolase [EC:3.7.1.17]	MER0017182	S33	MER0017182 - 2-hydroxy-6-oxo-6-phenylhexa-2,4-dienoate hydrolase ({Burkholderia}-type) (Rhodococcus jostii) [S33.016]#S33#{peptidase unit: 17-281}~source Q9KWQ6~	TRUE	0.88	492	1.896e-156	Serine aminopeptidase, S33 [PF12146.11]; alpha/beta hydrolase fold [PF00561.23]; Alpha/beta hydrolase family [PF12697.10]; Alpha/beta hydrolase of unknown function (DUF1057) [PF06342.15]; TAP-like protein [PF08386.13]; Ndr family [PF03096.17]; Phospholipase/Carboxylesterase [PF02230.19]					0
ENBDON_00713_gene	SARSHI1M.gff3_genome	C	K16049	3,4-dihydroxy-9,10-secoandrosta-1,3,5(10)-triene-9,17-dione 4,5-dioxygenase [EC:1.13.11.25]								Glyoxalase/Bleomycin resistance protein/Dioxygenase superfamily [PF00903.28]					0
ENBDON_00714_gene	SARSHI1M.gff3_genome	C	K16048	3-hydroxy-9,10-secoandrosta-1,3,5(10)-triene-9,17-dione monooxygenase reductase component [EC:1.5.1.-]								Flavin reductase like domain [PF01613.21]					0
ENBDON_00715_gene	SARSHI1M.gff3_genome	D										Domain of unknown function (DUF4190) [PF13828.9]					0
ENBDON_00716_gene	SARSHI1M.gff3_genome	E															0
ENBDON_00717_gene	SARSHI1M.gff3_genome	D										Acetoacetate decarboxylase (ADC) [PF06314.14]					0
ENBDON_00718_gene	SARSHI1M.gff3_genome	C	K06221	2,5-diketo-D-gluconate reductase A [EC:1.1.1.346]								Aldo/keto reductase family [PF00248.24]					0
ENBDON_00719_gene	SARSHI1M.gff3_genome	D										Protein of unknown function (DUF1214) [PF06742.14]; Protein of unknown function (DUF1254) [PF06863.15]					0
ENBDON_00720_gene	SARSHI1M.gff3_genome	D										Acyl-CoA dehydrogenase, C-terminal domain [PF00441.27]; Acyl-CoA dehydrogenase, N-terminal domain [PF02771.19]					0
ENBDON_00721_gene	SARSHI1M.gff3_genome	D										Acyl-CoA dehydrogenase, C-terminal domain [PF00441.27]					0
ENBDON_00722_gene	SARSHI1M.gff3_genome	D										Acyl-CoA dehydrogenase, middle domain [PF02770.22]; Acyl-CoA dehydrogenase, C-terminal domain [PF00441.27]; Acyl-CoA dehydrogenase, N-terminal domain [PF02771.19]					0
ENBDON_00723_gene	SARSHI1M.gff3_genome	C	K01692	enoyl-CoA hydratase [EC:4.2.1.17]	MER1072235	S49C	MER1072235 - subfamily S49C non-peptidase homologues (Acinetobacter sp. CIP 53.82) [S49.UNC]#S49C#{peptidase unit: 87-233}~source N9L3R9~	FALSE	0.408	89	6.626e-18	Enoyl-CoA hydratase/isomerase [PF00378.23]; Enoyl-CoA hydratase/isomerase [PF16113.8]					0
ENBDON_00724_gene	SARSHI1M.gff3_genome	C	K18687	HIP---CoA ligase [EC:6.2.1.41]								AMP-binding enzyme [PF00501.31]; AMP-binding enzyme C-terminal domain [PF13193.9]					0
ENBDON_00725_gene	SARSHI1M.gff3_genome	D										Acyl-CoA dehydrogenase, middle domain [PF02770.22]; Acyl-CoA dehydrogenase, C-terminal domain [PF00441.27]; Acyl-CoA dehydrogenase, N-terminal domain [PF02771.19]					0
ENBDON_00726_gene	SARSHI1M.gff3_genome	D										Enoyl-(Acyl carrier protein) reductase [PF13561.9]; short chain dehydrogenase [PF00106.28]; KR domain [PF08659.13]					0
ENBDON_00727_gene	SARSHI1M.gff3_genome	C	K22108	TetR/AcrR family transcriptional regulator, cholesterol catabolism regulator								Tetracyclin repressor-like, C-terminal domain [PF17932.4]; Bacterial regulatory proteins, tetR family [PF00440.26]; YsiA-like protein, C-terminal region [PF08359.14]; Tetracyclin repressor-like, C-terminal domain [PF17922.4]					0
ENBDON_00728_gene	SARSHI1M.gff3_genome	C	K00632	acetyl-CoA acyltransferase [EC:2.3.1.16]								Thiolase, N-terminal domain [PF00108.26]; Thiolase, C-terminal domain [PF02803.21]					0
ENBDON_00729_gene	SARSHI1M.gff3_genome	E															0
ENBDON_00730_gene	SARSHI1M.gff3_genome	D										Cytochrome P450 [PF00067.25]					0
ENBDON_00731_gene	SARSHI1M.gff3_genome	D										Bacterial regulatory proteins, tetR family [PF00440.26]					0
ENBDON_00732_gene	SARSHI1M.gff3_genome	D										Uncharacterized conserved protein (DUF2277) [PF10041.12]					0
ENBDON_00733_gene	SARSHI1M.gff3_genome	C	K00459	nitronate monooxygenase [EC:1.13.12.16]								Nitronate monooxygenase [PF03060.18]					0
ENBDON_00734_gene	SARSHI1M.gff3_genome	C	K01040	glutaconate CoA-transferase, subunit B [EC:2.8.3.12]													0
ENBDON_00735_gene	SARSHI1M.gff3_genome	C	K01039	glutaconate CoA-transferase, subunit A [EC:2.8.3.12]								Coenzyme A transferase [PF01144.26]					0
ENBDON_00736_gene	SARSHI1M.gff3_genome	D										Enoyl-CoA hydratase/isomerase [PF00378.23]; Enoyl-CoA hydratase/isomerase [PF16113.8]					0
ENBDON_00737_gene	SARSHI1M.gff3_genome	D										Enoyl-(Acyl carrier protein) reductase [PF13561.9]; short chain dehydrogenase [PF00106.28]; KR domain [PF08659.13]					0
ENBDON_00738_gene	SARSHI1M.gff3_genome	E															0
ENBDON_00739_gene	SARSHI1M.gff3_genome	C	K00540	F420H(2)-dependent quinone reductase [EC:1.1.98.-]								F420H(2)-dependent quinone reductase [PF04075.17]					0
ENBDON_00740_gene	SARSHI1M.gff3_genome	C	K00626	acetyl-CoA C-acetyltransferase [EC:2.3.1.9]								Thiolase, N-terminal domain [PF00108.26]; Thiolase, C-terminal domain [PF02803.21]					0
ENBDON_00741_gene	SARSHI1M.gff3_genome	C	K15981	cholest-4-en-3-one 26-monooxygenase [EC:1.14.15.29]								Cytochrome P450 [PF00067.25]					0
ENBDON_00742_gene	SARSHI1M.gff3_genome	C	K05898	3-oxosteroid 1-dehydrogenase [EC:1.3.99.4]								FAD binding domain [PF00890.27]; FAD dependent oxidoreductase [PF12831.10]; FAD dependent oxidoreductase [PF01266.27]; HI0933-like protein [PF03486.17]; FAD binding domain [PF01494.22]; NAD(P)-binding Rossmann-like domain [PF13450.9]					0
ENBDON_00743_gene	SARSHI1M.gff3_genome	D										Fungal trichothecene efflux pump (TRI12) [PF06609.16]; Sugar (and other) transporter [PF00083.27]					0
ENBDON_00744_gene	SARSHI1M.gff3_genome	C	K07141	molybdenum cofactor cytidylyltransferase [EC:2.7.7.76]								MobA-like NTP transferase domain [PF12804.10]; Nucleotidyl transferase [PF00483.26]; 2-C-methyl-D-erythritol 4-phosphate cytidylyltransferase [PF01128.22]					0
ENBDON_00745_gene	SARSHI1M.gff3_genome	C	K01822	steroid Delta-isomerase [EC:5.3.3.1]								SnoaL-like domain [PF12680.10]					0
ENBDON_00746_gene	SARSHI1M.gff3_genome	D										Luciferase-like monooxygenase [PF00296.23]					0
ENBDON_00747_gene	SARSHI1M.gff3_genome	D										Thiolase, N-terminal domain [PF00108.26]; Thiolase, C-terminal domain [PF02803.21]					0
ENBDON_00748_gene	SARSHI1M.gff3_genome	D										Thiolase, N-terminal domain [PF00108.26]					0
ENBDON_00749_gene	SARSHI1M.gff3_genome	C	K07068	uncharacterized protein								DUF35 OB-fold domain, acyl-CoA-associated [PF01796.20]					0
ENBDON_00750_gene	SARSHI1M.gff3_genome	D										Luciferase-like monooxygenase [PF00296.23]					0
ENBDON_00751_gene	SARSHI1M.gff3_genome	C	K01692	enoyl-CoA hydratase [EC:4.2.1.17]	MER1072352	S49C	MER1072352 - subfamily S49C non-peptidase homologues (Thermus thermophilus) [S49.UNC]#S49C#{peptidase unit: 85-201}~source P83702~	FALSE	0.429	84	2.416e-16	Enoyl-CoA hydratase/isomerase [PF00378.23]; Enoyl-CoA hydratase/isomerase [PF16113.8]					0
ENBDON_00752_gene	SARSHI1M.gff3_genome	C	K18688	3-oxocholest-4-en-26-oate---CoA ligase [EC:6.2.1.42]								AMP-binding enzyme [PF00501.31]; AMP-binding enzyme C-terminal domain [PF13193.9]					0
ENBDON_00753_gene	SARSHI1M.gff3_genome	C	K00459	nitronate monooxygenase [EC:1.13.12.16]								Nitronate monooxygenase [PF03060.18]; FMN-dependent dehydrogenase [PF01070.21]					0
ENBDON_00754_gene	SARSHI1M.gff3_genome	C	K21119	cytochrome P450 family 130								Cytochrome P450 [PF00067.25]					0
ENBDON_00755_gene	SARSHI1M.gff3_genome	C	K00368	nitrite reductase (NO-forming) [EC:1.7.2.1]								Multicopper oxidase [PF07732.18]; Cupredoxin-like domain [PF13473.9]; Multicopper oxidase [PF07731.17]; Copper binding proteins, plastocyanin/azurin family [PF00127.23]					0
ENBDON_00756_gene	SARSHI1M.gff3_genome	E															0
ENBDON_00757_gene	SARSHI1M.gff3_genome	E															0
ENBDON_00758_gene	SARSHI1M.gff3_genome	D										Hemerythrin HHE cation binding domain [PF01814.26]					0
ENBDON_00759_gene	SARSHI1M.gff3_genome	D										AMP-binding enzyme [PF00501.31]; AMP-binding enzyme C-terminal domain [PF13193.9]					0
ENBDON_00760_gene	SARSHI1M.gff3_genome	C	K22819	3-oxocholest-4-en-26-oyl-CoA dehydrogenase beta subunit [EC:1.3.99.-]								Acyl-CoA dehydrogenase, C-terminal domain [PF00441.27]; Acyl-CoA dehydrogenase, N-terminal domain [PF02771.19]; Acyl-CoA dehydrogenase, middle domain [PF02770.22]					0
ENBDON_00761_gene	SARSHI1M.gff3_genome	C	K22818	3-oxocholest-4-en-26-oyl-CoA dehydrogenase alpha subunit [EC:1.3.99.-]								Acyl-CoA dehydrogenase, C-terminal domain [PF00441.27]; Acyl-CoA dehydrogenase, middle domain [PF02770.22]; Acyl-CoA dehydrogenase, N-terminal domain [PF02771.19]					0
ENBDON_00762_gene	SARSHI1M.gff3_genome	C	K05337	ferredoxin								4Fe-4S single cluster domain [PF13459.9]; 4Fe-4S single cluster domain of Ferredoxin I [PF13370.9]; Divergent 4Fe-4S mono-cluster [PF06902.14]					0
ENBDON_00763_gene	SARSHI1M.gff3_genome	D										Enoyl-(Acyl carrier protein) reductase [PF13561.9]; short chain dehydrogenase [PF00106.28]; KR domain [PF08659.13]					0
ENBDON_00764_gene	SARSHI1M.gff3_genome	C	K02066	phospholipid/cholesterol/gamma-HCH transport system permease protein								Permease MlaE [PF02405.19]					0
ENBDON_00765_gene	SARSHI1M.gff3_genome	C	K02066	phospholipid/cholesterol/gamma-HCH transport system permease protein								Permease MlaE [PF02405.19]					0
ENBDON_00766_gene	SARSHI1M.gff3_genome	C	K02067	phospholipid/cholesterol/gamma-HCH transport system substrate-binding protein								Cholesterol uptake porter CUP1 of Mce4, putative [PF11887.11]; MlaD protein [PF02470.23]					0
ENBDON_00767_gene	SARSHI1M.gff3_genome	C	K02067	phospholipid/cholesterol/gamma-HCH transport system substrate-binding protein								Cholesterol uptake porter CUP1 of Mce4, putative [PF11887.11]; MlaD protein [PF02470.23]					0
ENBDON_00768_gene	SARSHI1M.gff3_genome	C	K02067	phospholipid/cholesterol/gamma-HCH transport system substrate-binding protein								Cholesterol uptake porter CUP1 of Mce4, putative [PF11887.11]; MlaD protein [PF02470.23]					0
ENBDON_00769_gene	SARSHI1M.gff3_genome	C	K02067	phospholipid/cholesterol/gamma-HCH transport system substrate-binding protein								Cholesterol uptake porter CUP1 of Mce4, putative [PF11887.11]; MlaD protein [PF02470.23]					0
ENBDON_00770_gene	SARSHI1M.gff3_genome	C	K02067	phospholipid/cholesterol/gamma-HCH transport system substrate-binding protein								Cholesterol uptake porter CUP1 of Mce4, putative [PF11887.11]; MlaD protein [PF02470.23]					0
ENBDON_00771_gene	SARSHI1M.gff3_genome	C	K02067	phospholipid/cholesterol/gamma-HCH transport system substrate-binding protein								Cholesterol uptake porter CUP1 of Mce4, putative [PF11887.11]; MlaD protein [PF02470.23]					0
ENBDON_00772_gene	SARSHI1M.gff3_genome	C	K18481	Mce-associated membrane protein													0
ENBDON_00773_gene	SARSHI1M.gff3_genome	C	K18481	Mce-associated membrane protein													0
ENBDON_00774_gene	SARSHI1M.gff3_genome	D										Response regulator receiver domain [PF00072.27]					0
ENBDON_00775_gene	SARSHI1M.gff3_genome	C	K00697	trehalose 6-phosphate synthase [EC:2.4.1.15 2.4.1.347]								Glycosyltransferase family 20 [PF00982.24]	GT20	GT20 alpha,alpha-trehalose-phosphate synthase [UDP-forming] (EC 2.4.1.15); Glucosylglycerol-phosphate synthase (EC 2.4.1.213); trehalose-6-P phosphatase (EC 3.1.3.12); [retaining] GDP-valeniol: validamine 7-phosphate valeniolyltransferase (EC 2.-.-.-)	2.4.1.15,2.4.1.213,2.-.-.-,3.1.3.12	GT20.hmm	0
ENBDON_00776_gene	SARSHI1M.gff3_genome	E															0
ENBDON_00777_gene	SARSHI1M.gff3_genome	D										ABC transporter [PF00005.30]; RecF/RecN/SMC N terminal domain [PF02463.22]					0
ENBDON_00778_gene	SARSHI1M.gff3_genome	D										ABC transporter [PF00005.30]; ABC transporter transmembrane region [PF00664.26]					0
ENBDON_00779_gene	SARSHI1M.gff3_genome	D			MER0507540	S33	MER0507540 - family S33 unassigned peptidases (Rhodococcus pyridinivorans) [S33.UPW]#S33#{peptidase unit: 9-265}~source YP_008989121~	TRUE	0.905	488	1.664e-155	Serine aminopeptidase, S33 [PF12146.11]; alpha/beta hydrolase fold [PF00561.23]; Alpha/beta hydrolase family [PF12697.10]; Prolyl oligopeptidase family [PF00326.24]; TAP-like protein [PF08386.13]					0
ENBDON_00780_gene	SARSHI1M.gff3_genome	D										Bacterial regulatory proteins, tetR family [PF00440.26]					0
ENBDON_00781_gene	SARSHI1M.gff3_genome	D										Ring hydroxylating alpha subunit (catalytic domain) [PF00848.22]; Rieske [2Fe-2S] domain [PF00355.29]					0
ENBDON_00782_gene	SARSHI1M.gff3_genome	D										Enoyl-CoA hydratase/isomerase [PF00378.23]; Enoyl-CoA hydratase/isomerase [PF16113.8]					0
ENBDON_00783_gene	SARSHI1M.gff3_genome	E															0
ENBDON_00784_gene	SARSHI1M.gff3_genome	D										CoA-transferase family III [PF02515.20]					0
ENBDON_00785_gene	SARSHI1M.gff3_genome	D										AMP-binding enzyme [PF00501.31]; AMP-binding enzyme C-terminal domain [PF13193.9]					0
ENBDON_00786_gene	SARSHI1M.gff3_genome	C	K08195	MFS transporter, AAHS family, 4-hydroxybenzoate transporter								Sugar (and other) transporter [PF00083.27]; Major Facilitator Superfamily [PF07690.19]; Transmembrane secretion effector [PF05977.16]; MFS_1 like family [PF12832.10]					0
ENBDON_00787_gene	SARSHI1M.gff3_genome	D										Molybdopterin oxidoreductase [PF00384.25]; Molydopterin dinucleotide binding domain [PF01568.24]; Molybdopterin oxidoreductase Fe4S4 domain [PF04879.19]					0
ENBDON_00788_gene	SARSHI1M.gff3_genome	D										Molybdopterin oxidoreductase [PF00384.25]; Molydopterin dinucleotide binding domain [PF01568.24]; Molybdopterin oxidoreductase Fe4S4 domain [PF04879.19]					0
ENBDON_00789_gene	SARSHI1M.gff3_genome	D										3-hydroxyacyl-CoA dehydrogenase, NAD binding domain [PF02737.21]; 3-hydroxyacyl-CoA dehydrogenase, C-terminal domain [PF00725.25]					0
ENBDON_00790_gene	SARSHI1M.gff3_genome	C	K00528	ferredoxin/flavodoxin---NADP+ reductase [EC:1.18.1.2 1.19.1.1]								4Fe-4S dicluster domain [PF12838.10]; Pyridine nucleotide-disulphide oxidoreductase [PF07992.17]; 4Fe-4S dicluster domain [PF13247.9]; 4Fe-4S dicluster domain [PF14697.9]; 4Fe-4S dicluster domain [PF13187.9]; 4Fe-4S binding domain [PF00037.30]; 4Fe-4S double cluster binding domain [PF13484.9]					0
ENBDON_00791_gene	SARSHI1M.gff3_genome	D										AMP-binding enzyme [PF00501.31]; AMP-binding enzyme C-terminal domain [PF13193.9]					0
ENBDON_00792_gene	SARSHI1M.gff3_genome	D										Enoyl-(Acyl carrier protein) reductase [PF13561.9]; short chain dehydrogenase [PF00106.28]; KR domain [PF08659.13]					0
ENBDON_00793_gene	SARSHI1M.gff3_genome	D			MER0011529	M20X	MER0011529 - family M20 unassigned peptidases (Campylobacter jejuni) [M20.UPW]#M20X#{peptidase unit: 1-415}~source Q9S3L1~	FALSE	0.254	129	1.155e-29	Sugar (and other) transporter [PF00083.27]; Major Facilitator Superfamily [PF07690.19]					0
ENBDON_00794_gene	SARSHI1M.gff3_genome	D										Molybdopterin oxidoreductase [PF00384.25]; Molydopterin dinucleotide binding domain [PF01568.24]; Molybdopterin oxidoreductase Fe4S4 domain [PF04879.19]					0
ENBDON_00795_gene	SARSHI1M.gff3_genome	D										Enoyl-(Acyl carrier protein) reductase [PF13561.9]; short chain dehydrogenase [PF00106.28]; KR domain [PF08659.13]					0
ENBDON_00796_gene	SARSHI1M.gff3_genome	C	K01692	enoyl-CoA hydratase [EC:4.2.1.17]								Enoyl-CoA hydratase/isomerase [PF00378.23]; Enoyl-CoA hydratase/isomerase [PF16113.8]					0
ENBDON_00797_gene	SARSHI1M.gff3_genome	C	K00320	5,10-methylenetetrahydromethanopterin reductase [EC:1.5.98.2]								Luciferase-like monooxygenase [PF00296.23]					0
ENBDON_00798_gene	SARSHI1M.gff3_genome	D										Thiolase-like protein type 1 additional C-terminal domain [PF18313.4]					0
ENBDON_00799_gene	SARSHI1M.gff3_genome	E															0
ENBDON_00800_gene	SARSHI1M.gff3_genome	C	K07068	uncharacterized protein								Rubredoxin-like zinc ribbon domain (DUF35_N) [PF12172.11]; DUF35 OB-fold domain, acyl-CoA-associated [PF01796.20]					1
ENBDON_00801_gene	SARSHI1M.gff3_genome	D										Thiolase, N-terminal domain [PF00108.26]; Thiolase, C-terminal domain [PF02803.21]					0
ENBDON_00802_gene	SARSHI1M.gff3_genome	D										Aldehyde dehydrogenase family [PF00171.25]					0
ENBDON_00803_gene	SARSHI1M.gff3_genome	C	K18702	CoA:oxalate CoA-transferase [EC:2.8.3.19]								CoA-transferase family III [PF02515.20]					0
ENBDON_00804_gene	SARSHI1M.gff3_genome	D										Cytochrome P450 [PF00067.25]					0
ENBDON_00805_gene	SARSHI1M.gff3_genome	D										EutQ-like cupin domain [PF05899.15]					0
ENBDON_00806_gene	SARSHI1M.gff3_genome	C	K14733	limonene 1,2-monooxygenase [EC:1.14.13.107]								Luciferase-like monooxygenase [PF00296.23]					0
ENBDON_00807_gene	SARSHI1M.gff3_genome	D										Enoyl-(Acyl carrier protein) reductase [PF13561.9]; short chain dehydrogenase [PF00106.28]; KR domain [PF08659.13]					0
ENBDON_00808_gene	SARSHI1M.gff3_genome	C	K07068	uncharacterized protein								Rubredoxin-like zinc ribbon domain (DUF35_N) [PF12172.11]; DUF35 OB-fold domain, acyl-CoA-associated [PF01796.20]					0
ENBDON_00809_gene	SARSHI1M.gff3_genome	D										Thiolase, N-terminal domain [PF00108.26]					0
ENBDON_00810_gene	SARSHI1M.gff3_genome	D										Lipocalin-like domain [PF13924.9]					0
ENBDON_00811_gene	SARSHI1M.gff3_genome	E															0
ENBDON_00812_gene	SARSHI1M.gff3_genome	D										Flavin reductase like domain [PF01613.21]					0
ENBDON_00813_gene	SARSHI1M.gff3_genome	C	K18476	TetR/AcrR family transcriptional regulator, tetracycline repressor protein								Tetracyclin repressor-like, C-terminal domain [PF02909.20]; Bacterial regulatory proteins, tetR family [PF00440.26]					0
ENBDON_00814_gene	SARSHI1M.gff3_genome	D										Aldehyde dehydrogenase family [PF00171.25]					0
ENBDON_00815_gene	SARSHI1M.gff3_genome	D										Ring hydroxylating alpha subunit (catalytic domain) [PF00848.22]; Rieske [2Fe-2S] domain [PF00355.29]					0
ENBDON_00816_gene	SARSHI1M.gff3_genome	C	K05548	MFS transporter, AAHS family, benzoate transport protein								Sugar (and other) transporter [PF00083.27]; Major Facilitator Superfamily [PF07690.19]; Uncharacterised MFS-type transporter YbfB [PF06779.17]					0
ENBDON_00817_gene	SARSHI1M.gff3_genome	E															0
ENBDON_00818_gene	SARSHI1M.gff3_genome	D										Enoyl-(Acyl carrier protein) reductase [PF13561.9]; short chain dehydrogenase [PF00106.28]; KR domain [PF08659.13]					0
ENBDON_00819_gene	SARSHI1M.gff3_genome	C	K05337	ferredoxin								4Fe-4S single cluster domain [PF13459.9]; 4Fe-4S single cluster domain of Ferredoxin I [PF13370.9]					0
ENBDON_00820_gene	SARSHI1M.gff3_genome	D										Cytochrome P450 [PF00067.25]					0
ENBDON_00821_gene	SARSHI1M.gff3_genome	D										Cytochrome P450 [PF00067.25]					0
ENBDON_00822_gene	SARSHI1M.gff3_genome	C	K00249	acyl-CoA dehydrogenase [EC:1.3.8.7]								Acyl-CoA dehydrogenase, C-terminal domain [PF00441.27]; Acyl-CoA dehydrogenase, middle domain [PF02770.22]; Acyl-CoA dehydrogenase, N-terminal domain [PF02771.19]					0
ENBDON_00823_gene	SARSHI1M.gff3_genome	D										Ring hydroxylating alpha subunit (catalytic domain) [PF00848.22]; Rieske [2Fe-2S] domain [PF00355.29]					0
ENBDON_00824_gene	SARSHI1M.gff3_genome	C	K15520	mycothiol synthase [EC:2.3.1.189]													0
ENBDON_00825_gene	SARSHI1M.gff3_genome	D										Enoyl-(Acyl carrier protein) reductase [PF13561.9]; short chain dehydrogenase [PF00106.28]; KR domain [PF08659.13]					0
ENBDON_00826_gene	SARSHI1M.gff3_genome	D										Aldehyde dehydrogenase family [PF00171.25]					0
ENBDON_00827_gene	SARSHI1M.gff3_genome	C	K18476	TetR/AcrR family transcriptional regulator, tetracycline repressor protein								Bacterial regulatory proteins, tetR family [PF00440.26]; Tetracyclin repressor-like, C-terminal domain [PF02909.20]					0
ENBDON_00828_gene	SARSHI1M.gff3_genome	D			MER0096193	S33	MER0096193 - family S33 unassigned peptidases (Rhodococcus jostii) [S33.UPW]#S33#{peptidase unit: 9-271}~source ABG92207~	TRUE	0.819	445	2.637e-140	Serine aminopeptidase, S33 [PF12146.11]; alpha/beta hydrolase fold [PF00561.23]; Alpha/beta hydrolase family [PF12697.10]; TAP-like protein [PF08386.13]					0
ENBDON_00829_gene	SARSHI1M.gff3_genome	C	K00059	3-oxoacyl-[acyl-carrier protein] reductase [EC:1.1.1.100]								Enoyl-(Acyl carrier protein) reductase [PF13561.9]; short chain dehydrogenase [PF00106.28]; KR domain [PF08659.13]					0
ENBDON_00830_gene	SARSHI1M.gff3_genome	D										Oxidoreductase FAD-binding domain [PF00970.27]; 2Fe-2S iron-sulfur cluster binding domain [PF00111.30]; Oxidoreductase NAD-binding domain [PF00175.24]					0
ENBDON_00831_gene	SARSHI1M.gff3_genome	D										Major Facilitator Superfamily [PF07690.19]; Fungal trichothecene efflux pump (TRI12) [PF06609.16]; Uncharacterised MFS-type transporter YbfB [PF06779.17]; Sugar (and other) transporter [PF00083.27]					0
ENBDON_00832_gene	SARSHI1M.gff3_genome	D										AMP-binding enzyme [PF00501.31]; AMP-binding enzyme C-terminal domain [PF13193.9]					0
ENBDON_00833_gene	SARSHI1M.gff3_genome	C	K01692	enoyl-CoA hydratase [EC:4.2.1.17]								Enoyl-CoA hydratase/isomerase [PF00378.23]; Enoyl-CoA hydratase/isomerase [PF16113.8]					0
ENBDON_00834_gene	SARSHI1M.gff3_genome	D										Bacterial regulatory proteins, tetR family [PF00440.26]					0
ENBDON_00835_gene	SARSHI1M.gff3_genome	D										Enoyl-(Acyl carrier protein) reductase [PF13561.9]; short chain dehydrogenase [PF00106.28]					0
ENBDON_00836_gene	SARSHI1M.gff3_genome	D										Xylose isomerase-like TIM barrel [PF01261.27]					0
ENBDON_00837_gene	SARSHI1M.gff3_genome	C	K08172	MFS transporter, MHS family, shikimate and dehydroshikimate transport protein	MER0011529	M20X	MER0011529 - family M20 unassigned peptidases (Campylobacter jejuni) [M20.UPW]#M20X#{peptidase unit: 1-415}~source Q9S3L1~	FALSE	0.258	137	2.837e-32	Sugar (and other) transporter [PF00083.27]; Major Facilitator Superfamily [PF07690.19]					0
ENBDON_00838_gene	SARSHI1M.gff3_genome	C	K00615	transketolase [EC:2.2.1.1]								Transketolase, thiamine diphosphate binding domain [PF00456.24]; Dehydrogenase E1 component [PF00676.23]					0
ENBDON_00839_gene	SARSHI1M.gff3_genome	C	K00615	transketolase [EC:2.2.1.1]								Transketolase, pyrimidine binding domain [PF02779.27]; Transketolase, C-terminal domain [PF02780.23]					0
ENBDON_00840_gene	SARSHI1M.gff3_genome	D										FCD domain [PF07729.15]; Bacterial regulatory proteins, gntR family [PF00392.24]					0
ENBDON_00841_gene	SARSHI1M.gff3_genome	C	K00626	acetyl-CoA C-acetyltransferase [EC:2.3.1.9]								Thiolase, N-terminal domain [PF00108.26]; Thiolase, C-terminal domain [PF02803.21]					0
ENBDON_00842_gene	SARSHI1M.gff3_genome	C	K01029	3-oxoacid CoA-transferase subunit B [EC:2.8.3.5]								Coenzyme A transferase [PF01144.26]					0
ENBDON_00843_gene	SARSHI1M.gff3_genome	C	K01028	3-oxoacid CoA-transferase subunit A [EC:2.8.3.5]								Coenzyme A transferase [PF01144.26]					0
ENBDON_00844_gene	SARSHI1M.gff3_genome	D										Bacterial transcriptional regulator [PF01614.21]; IclR helix-turn-helix domain [PF09339.13]					0
ENBDON_00845_gene	SARSHI1M.gff3_genome	D										Phosphotransferase enzyme family [PF01636.26]; Fructosamine kinase [PF03881.17]; Ecdysteroid kinase-like family [PF02958.23]					0
ENBDON_00846_gene	SARSHI1M.gff3_genome	C	K19707	sigma-B regulation protein RsbQ	MER0041283	S33	MER0041283 - family S33 unassigned peptidases (Nocardia farcinica) [S33.UPW]#S33#{peptidase unit: 1-278}~source YP_119499-1~	TRUE	0.779	422	1.576e-132	Serine aminopeptidase, S33 [PF12146.11]; alpha/beta hydrolase fold [PF00561.23]; Alpha/beta hydrolase family [PF12697.10]; TAP-like protein [PF08386.13]; Chlorophyllase enzyme [PF12740.10]; Alpha/beta hydrolase domain [PF20408.1]					0
ENBDON_00847_gene	SARSHI1M.gff3_genome	C	K07315	phosphoserine phosphatase RsbU/P [EC:3.1.3.3]								Stage II sporulation protein E (SpoIIE) [PF07228.15]					0
ENBDON_00848_gene	SARSHI1M.gff3_genome	D										Enoyl-CoA hydratase/isomerase [PF00378.23]; Enoyl-CoA hydratase/isomerase [PF16113.8]					0
ENBDON_00849_gene	SARSHI1M.gff3_genome	D										Phosphotransferase enzyme family [PF01636.26]; Ecdysteroid kinase-like family [PF02958.23]					0
ENBDON_00850_gene	SARSHI1M.gff3_genome	D										Acyl-CoA dehydrogenase, middle domain [PF02770.22]; Acyl-CoA dehydrogenase, C-terminal domain [PF00441.27]; Acyl-CoA dehydrogenase, N-terminal domain [PF02771.19]					0
ENBDON_00851_gene	SARSHI1M.gff3_genome	D										Acyl-CoA dehydrogenase, C-terminal domain [PF00441.27]; Acyl-CoA dehydrogenase, N-terminal domain [PF02771.19]					0
ENBDON_00852_gene	SARSHI1M.gff3_genome	D										AMP-binding enzyme [PF00501.31]; AMP-binding enzyme C-terminal domain [PF13193.9]					0
ENBDON_00853_gene	SARSHI1M.gff3_genome	D										Thioesterase-like superfamily [PF13622.9]; Acyl-CoA thioesterase [PF02551.18]					0
ENBDON_00854_gene	SARSHI1M.gff3_genome	D										Haloacid dehalogenase-like hydrolase [PF13419.9]; HAD-hyrolase-like [PF13242.9]; haloacid dehalogenase-like hydrolase [PF00702.29]					0
ENBDON_00855_gene	SARSHI1M.gff3_genome	D										Nucleotidyl transferase of unknown function (DUF2204) [PF09970.12]; Uncharacterised nucleotidyltransferase [PF14907.9]					0
ENBDON_00856_gene	SARSHI1M.gff3_genome	D										BON domain [PF04972.20]					0
ENBDON_00857_gene	SARSHI1M.gff3_genome	C	K07096	uncharacterized protein								Calcineurin-like phosphoesterase [PF00149.31]; Calcineurin-like phosphoesterase superfamily domain [PF12850.10]					0
ENBDON_00858_gene	SARSHI1M.gff3_genome	D										N-terminal domain of oxidoreductase [PF16884.8]; Zinc-binding dehydrogenase [PF00107.29]; Zinc-binding dehydrogenase [PF13602.9]					0
ENBDON_00859_gene	SARSHI1M.gff3_genome	C	K07496	putative transposase								Putative transposase DNA-binding domain [PF07282.14]; Probable transposase [PF01385.22]					0
ENBDON_00860_gene	SARSHI1M.gff3_genome	D										AMP-binding enzyme [PF00501.31]; AMP-binding enzyme C-terminal domain [PF13193.9]					0
ENBDON_00861_gene	SARSHI1M.gff3_genome	C	K10531	L-ornithine N5-monooxygenase [EC:1.14.13.195 1.14.13.196]								L-lysine 6-monooxygenase/L-ornithine 5-monooxygenase [PF13434.9]; FAD-NAD(P)-binding [PF13454.9]; Pyridine nucleotide-disulphide oxidoreductase [PF07992.17]					0
ENBDON_00862_gene	SARSHI1M.gff3_genome	C	K05375	MbtH protein								MbtH-like protein [PF03621.16]					0
ENBDON_00863_gene	SARSHI1M.gff3_genome	D										Putative threonine/serine exporter [PF06738.15]; Threonine/Serine exporter, ThrE [PF12821.10]					0
ENBDON_00865_gene	SARSHI1M.gff3_genome	E															0
ENBDON_00866_gene	SARSHI1M.gff3_genome	D										HxlR-like helix-turn-helix [PF01638.20]					0
ENBDON_00867_gene	SARSHI1M.gff3_genome	E															0
ENBDON_00868_gene	SARSHI1M.gff3_genome	C	K12132	eukaryotic-like serine/threonine-protein kinase [EC:2.7.11.1]								Protein kinase domain [PF00069.28]; Protein tyrosine and serine/threonine kinase [PF07714.20]; Lipopolysaccharide kinase (Kdo/WaaP) family [PF06293.17]; Fungal protein kinase [PF17667.4]; Kinase-like [PF14531.9]; ABC1 atypical kinase-like domain [PF03109.19]					0
ENBDON_00869_gene	SARSHI1M.gff3_genome	C	K09516	all-trans-retinol 13,14-reductase [EC:1.3.99.23]								Flavin containing amine oxidoreductase [PF01593.27]; NAD(P)-binding Rossmann-like domain [PF13450.9]; FAD dependent oxidoreductase [PF12831.10]; FAD binding domain [PF01494.22]; Lycopene cyclase protein [PF05834.15]; HI0933-like protein [PF03486.17]; Pyridine nucleotide-disulphide oxidoreductase [PF07992.17]; FAD dependent oxidoreductase [PF01266.27]; FAD binding domain [PF00890.27]					0
ENBDON_00870_gene	SARSHI1M.gff3_genome	E															0
ENBDON_00871_gene	SARSHI1M.gff3_genome	D										SnoaL-like domain [PF13474.9]; Glyoxalase-like domain [PF12681.10]; Glyoxalase-like domain [PF18029.4]; Domain of unknown function (DUF4440) [PF14534.9]; SnoaL-like domain [PF13577.9]; Glyoxalase/Bleomycin resistance protein/Dioxygenase superfamily [PF00903.28]; Glyoxalase superfamily protein [PF19581.2]					0
ENBDON_00872_gene	SARSHI1M.gff3_genome	E															0
ENBDON_00873_gene	SARSHI1M.gff3_genome	E															0
ENBDON_00874_gene	SARSHI1M.gff3_genome	D										Bacterial Ig-like domain (group 3) [PF16640.8]					0
ENBDON_00875_gene	SARSHI1M.gff3_genome	C	K02483	two-component system, OmpR family, response regulator								Response regulator receiver domain [PF00072.27]; Transcriptional regulatory protein, C terminal [PF00486.31]					0
ENBDON_00876_gene	SARSHI1M.gff3_genome	C	K02484	two-component system, OmpR family, sensor kinase [EC:2.7.13.3]								Histidine kinase-, DNA gyrase B-, and HSP90-like ATPase [PF02518.29]; His Kinase A (phospho-acceptor) domain [PF00512.28]; HAMP domain [PF00672.28]					0
ENBDON_00877_gene	SARSHI1M.gff3_genome	C	K03821	poly[(R)-3-hydroxyalkanoate] polymerase subunit PhaC [EC:2.3.1.304]	MER0174012	S33	MER0174012 - family S33 unassigned peptidases (Rhodococcus opacus) [S33.UPW]#S33#{peptidase unit: 9-350}~source BAH52553~	TRUE	0.592	392	1.775e-120	alpha/beta hydrolase fold [PF00561.23]; Serine aminopeptidase, S33 [PF12146.11]; Protein of unknown function (DUF3141) [PF11339.11]					0
ENBDON_00878_gene	SARSHI1M.gff3_genome	D										HIT domain [PF01230.26]; Scavenger mRNA decapping enzyme C-term binding [PF11969.11]					0
ENBDON_00879_gene	SARSHI1M.gff3_genome	D										Phosphoribulokinase / Uridine kinase family [PF00485.21]; Thymidylate kinase [PF02223.20]					0
ENBDON_00880_gene	SARSHI1M.gff3_genome	C	K01945	phosphoribosylamine---glycine ligase [EC:6.3.4.13]								Phosphoribosylglycinamide synthetase, ATP-grasp (A) domain [PF01071.22]; Phosphoribosylglycinamide synthetase, N domain [PF02844.18]; Phosphoribosylglycinamide synthetase, C domain [PF02843.19]; ATP-grasp domain [PF02655.17]; D-ala D-ala ligase C-terminus [PF07478.16]; ATP-grasp domain [PF08442.13]; ATP-grasp domain [PF13535.9]					0
ENBDON_00881_gene	SARSHI1M.gff3_genome	D										Aminotransferase class I and II [PF00155.24]					0
ENBDON_00882_gene	SARSHI1M.gff3_genome	C	K23778	TetR/AcrR family transcriptional regulator, regulator of biofilm formation and stress response								Tetracyclin repressor-like, C-terminal domain [PF17940.4]					0
ENBDON_00883_gene	SARSHI1M.gff3_genome	C	K01756	adenylosuccinate lyase [EC:4.3.2.2]								Lyase [PF00206.23]; Adenylosuccinate lyase C-terminus [PF10397.12]					0
ENBDON_00884_gene	SARSHI1M.gff3_genome	D										Bacterial regulatory proteins, tetR family [PF00440.26]					0
ENBDON_00885_gene	SARSHI1M.gff3_genome	C	K02503	histidine triad (HIT) family protein								HIT domain [PF01230.26]; Scavenger mRNA decapping enzyme C-term binding [PF11969.11]					0
ENBDON_00886_gene	SARSHI1M.gff3_genome	E															0
ENBDON_00887_gene	SARSHI1M.gff3_genome	D			MER1010212	S12	MER1010212 - family S12 unassigned peptidases (Rhodococcus aetherivorans) [S12.UPW]#S12#{peptidase unit: 22-380}~source A0A059MUJ1~	TRUE	0.953	721	1.056e-233	Beta-lactamase [PF00144.27]					0
ENBDON_00888_gene	SARSHI1M.gff3_genome	C	K03762	MFS transporter, MHS family, proline/betaine transporter	MER0011529	M20X	MER0011529 - family M20 unassigned peptidases (Campylobacter jejuni) [M20.UPW]#M20X#{peptidase unit: 1-415}~source Q9S3L1~	FALSE	0.24	125	1.505e-28	Sugar (and other) transporter [PF00083.27]; Major Facilitator Superfamily [PF07690.19]					0
ENBDON_00889_gene	SARSHI1M.gff3_genome	C	K23775	MarR family transcriptional regulator, organic hydroperoxide resistance regulator								MarR family [PF01047.25]; Winged helix DNA-binding domain [PF13463.9]; MarR family [PF12802.10]; Sugar-specific transcriptional regulator TrmB [PF01978.22]; Penicillinase repressor [PF03965.19]					0
ENBDON_00890_gene	SARSHI1M.gff3_genome	D										Metal binding domain of Ada [PF02805.19]					0
ENBDON_00891_gene	SARSHI1M.gff3_genome	C	K09990	uncharacterized protein								Oxygenase, catalysing oxidative methylation of damaged DNA [PF09859.12]					0
ENBDON_00892_gene	SARSHI1M.gff3_genome	D										Winged helix DNA-binding domain [PF13463.9]; MarR family [PF12802.10]; MarR family [PF01047.25]					0
ENBDON_00893_gene	SARSHI1M.gff3_genome	C	K06147	ATP-binding cassette, subfamily B, bacterial								ABC transporter [PF00005.30]; ABC transporter transmembrane region [PF00664.26]					0
ENBDON_00894_gene	SARSHI1M.gff3_genome	C	K01252	bifunctional isochorismate lyase / aryl carrier protein [EC:3.3.2.1 6.3.2.14]								Isochorismatase family [PF00857.23]					0
ENBDON_00895_gene	SARSHI1M.gff3_genome	C	K02363	2,3-dihydroxybenzoate---[aryl-carrier protein] ligase [EC:6.3.2.14 6.2.1.71]								AMP-binding enzyme [PF00501.31]; AMP-binding enzyme C-terminal domain [PF13193.9]					0
ENBDON_00896_gene	SARSHI1M.gff3_genome	C	K00216	2,3-dihydro-2,3-dihydroxybenzoate dehydrogenase [EC:1.3.1.28]								Enoyl-(Acyl carrier protein) reductase [PF13561.9]; short chain dehydrogenase [PF00106.28]; KR domain [PF08659.13]; NAD dependent epimerase/dehydratase family [PF01370.24]; GDP-mannose 4,6 dehydratase [PF16363.8]; 3-beta hydroxysteroid dehydrogenase/isomerase family [PF01073.22]					0
ENBDON_00897_gene	SARSHI1M.gff3_genome	C	K02361	isochorismate synthase [EC:5.4.4.2]	MER0491788	C26	MER0491788 - family C26 unassigned peptidases (Halogranum salarium) [C26.UPW]#C26#{peptidase unit: 360-446}~source WP_009374489~	FALSE	0.397	61	3.02e-08	chorismate binding enzyme [PF00425.21]					0
ENBDON_00898_gene	SARSHI1M.gff3_genome	D										Condensation domain [PF00668.23]; AMP-binding enzyme [PF00501.31]; AMP-binding enzyme C-terminal domain [PF13193.9]; Phosphopantetheine attachment site [PF00550.28]					0
ENBDON_00899_gene	SARSHI1M.gff3_genome	D										Acetyltransferase (GNAT) family [PF00583.28]; Acetyltransferase (GNAT) domain [PF13508.10]; Acetyltransferase (GNAT) domain [PF13420.10]; Acetyltransferase (GNAT) domain [PF13673.10]; FR47-like protein [PF08445.13]					0
ENBDON_00900_gene	SARSHI1M.gff3_genome	C	K01714	4-hydroxy-tetrahydrodipicolinate synthase [EC:4.3.3.7]								Dihydrodipicolinate synthetase family [PF00701.25]					0
ENBDON_00901_gene	SARSHI1M.gff3_genome	D										Class II Aldolase and Adducin N-terminal domain [PF00596.24]					0
ENBDON_00902_gene	SARSHI1M.gff3_genome	D										Helix-turn-helix domain [PF12844.10]; Helix-turn-helix [PF01381.25]; Mannose-6-phosphate isomerase [PF01050.21]; Helix-turn-helix domain [PF13560.9]; AraC-like ligand binding domain [PF02311.22]; Ethanolamine utilisation protein EutQ [PF06249.15]					0
ENBDON_00903_gene	SARSHI1M.gff3_genome	E															0
ENBDON_00904_gene	SARSHI1M.gff3_genome	D										Periplasmic binding protein [PF01497.21]					0
ENBDON_00905_gene	SARSHI1M.gff3_genome	D										Condensation domain [PF00668.23]; AMP-binding enzyme [PF00501.31]; AMP-binding enzyme C-terminal domain [PF13193.9]; Phosphopantetheine attachment site [PF00550.28]					0
ENBDON_00906_gene	SARSHI1M.gff3_genome	E															0
ENBDON_00907_gene	SARSHI1M.gff3_genome	C	K08225	MFS transporter, ENTS family, enterobactin (siderophore) exporter								Transmembrane secretion effector [PF05977.16]; Major Facilitator Superfamily [PF07690.19]					0
ENBDON_00908_gene	SARSHI1M.gff3_genome	D										RibD C-terminal domain [PF01872.20]					0
ENBDON_00909_gene	SARSHI1M.gff3_genome	E															0
ENBDON_00910_gene	SARSHI1M.gff3_genome	D										ubiE/COQ5 methyltransferase family [PF01209.21]; Methyltransferase domain [PF08241.15]; Methyltransferase domain [PF13489.9]; Methyltransferase domain [PF13649.9]; Methyltransferase domain [PF13847.9]; Methyltransferase domain [PF08242.15]; Nodulation protein S (NodS) [PF05401.14]; Methionine biosynthesis protein MetW [PF07021.15]; Putative methyltransferase [PF02390.20]; Protein-L-isoaspartate(D…					0
ENBDON_00911_gene	SARSHI1M.gff3_genome	D										Activator of Hsp90 ATPase homolog 1-like protein [PF08327.14]; Polyketide cyclase / dehydrase and lipid transport [PF10604.12]					0
ENBDON_00912_gene	SARSHI1M.gff3_genome	D										Helix-turn-helix domain [PF12840.10]; Bacterial regulatory protein, arsR family [PF01022.23]					0
ENBDON_00913_gene	SARSHI1M.gff3_genome	D			MER0072578	S33	MER0072578 - family S33 unassigned peptidases (Rhodococcus jostii) [S33.UPW]#S33#{peptidase unit: 110-566}~source ABG92995~	FALSE	0.718	662	4.112e-211	TAP-like protein [PF08386.13]; alpha/beta hydrolase fold [PF00561.23]					0
ENBDON_00914_gene	SARSHI1M.gff3_genome	C	K07816	GTP pyrophosphokinase [EC:2.7.6.5]								Region found in RelA / SpoT proteins [PF04607.20]					0
ENBDON_00915_gene	SARSHI1M.gff3_genome	C	K07229	ferric-chelate reductase (NADPH) [EC:1.16.1.9]								Siderophore-interacting protein [PF04954.16]; Siderophore-interacting FAD-binding domain [PF08021.14]					0
ENBDON_00916_gene	SARSHI1M.gff3_genome	D										Fungal trichothecene efflux pump (TRI12) [PF06609.16]; Major Facilitator Superfamily [PF07690.19]; Sugar (and other) transporter [PF00083.27]					0
ENBDON_00917_gene	SARSHI1M.gff3_genome	C	K01923	phosphoribosylaminoimidazole-succinocarboxamide synthase [EC:6.3.2.6]								SAICAR synthetase [PF01259.21]					0
ENBDON_00918_gene	SARSHI1M.gff3_genome	C	K01354	oligopeptidase B [EC:3.4.21.83]	MER0985341	S09A	MER0985341 - subfamily S9A unassigned peptidases (Rhodococcus ruber) [S09.UPA]#S09A#{peptidase unit: 441-707}~source M2ZTQ0~	TRUE	0.976	552	1.571e-169	Prolyl oligopeptidase, N-terminal beta-propeller domain [PF02897.18]; Prolyl oligopeptidase family [PF00326.24]					0
ENBDON_00919_gene	SARSHI1M.gff3_genome	D										Response regulator receiver domain [PF00072.27]; FaeA-like protein [PF04703.15]					0
ENBDON_00920_gene	SARSHI1M.gff3_genome	C	K02476	two-component system, CitB family, sensor kinase [EC:2.7.13.3]								Single cache domain 3 [PF17203.7]; Histidine kinase-, DNA gyrase B-, and HSP90-like ATPase [PF02518.29]; GHKL domain [PF14501.9]; Histidine kinase-, DNA gyrase B-, and HSP90-like ATPase [PF13589.9]; Sensor_kinase_SpoOB-type, alpha-helical domain [PF14689.9]					0
ENBDON_00921_gene	SARSHI1M.gff3_genome	C	K11103	aerobic C4-dicarboxylate transport protein								Sodium:dicarboxylate symporter family [PF00375.21]					0
ENBDON_00922_gene	SARSHI1M.gff3_genome	C	K01239	purine nucleosidase [EC:3.2.2.1]								Inosine-uridine preferring nucleoside hydrolase [PF01156.22]					0
ENBDON_00923_gene	SARSHI1M.gff3_genome	C	K04761	LysR family transcriptional regulator, hydrogen peroxide-inducible genes activator								LysR substrate binding domain [PF03466.23]; Bacterial regulatory helix-turn-helix protein, lysR family [PF00126.30]					0
ENBDON_00924_gene	SARSHI1M.gff3_genome	C	K03387	NADH-dependent peroxiredoxin subunit F [EC:1.8.1.-]								Pyridine nucleotide-disulphide oxidoreductase [PF07992.17]; Thioredoxin domain [PF13192.9]; Flavin-binding monooxygenase-like [PF00743.22]; Pyridine nucleotide-disulphide oxidoreductase [PF00070.30]; FAD dependent oxidoreductase [PF12831.10]; L-lysine 6-monooxygenase/L-ornithine 5-monooxygenase [PF13434.9]					0
ENBDON_00925_gene	SARSHI1M.gff3_genome	C	K24119	NADH-dependent peroxiredoxin subunit C [EC:1.11.1.26]								AhpC/TSA family [PF00578.24]; SCO1/SenC [PF02630.17]					0
ENBDON_00926_gene	SARSHI1M.gff3_genome	D										Metallo-beta-lactamase superfamily [PF00753.30]; F420H(2)-dependent quinone reductase [PF04075.17]					0
ENBDON_00927_gene	SARSHI1M.gff3_genome	C	K09122	uncharacterized protein								Mut7-C RNAse domain [PF01927.19]; Mut7-C ubiquitin [PF14451.9]; Domain of unknown function (DUF5615) [PF18480.4]					0
ENBDON_00928_gene	SARSHI1M.gff3_genome	D										GAF domain [PF13185.9]; GAF domain [PF01590.29]; ANTAR domain [PF03861.17]					0
ENBDON_00929_gene	SARSHI1M.gff3_genome	C	K01950	NAD+ synthase (glutamine-hydrolysing) [EC:6.3.5.1]								NAD synthase [PF02540.20]; Carbon-nitrogen hydrolase [PF00795.25]					0
ENBDON_00930_gene	SARSHI1M.gff3_genome	C	K14155	cysteine-S-conjugate beta-lyase [EC:4.4.1.13]								Aminotransferase class I and II [PF00155.24]					0
ENBDON_00931_gene	SARSHI1M.gff3_genome	D										Mycothiol maleylpyruvate isomerase N-terminal domain [PF11716.11]					0
ENBDON_00932_gene	SARSHI1M.gff3_genome	D										AAA ATPase domain [PF13191.9]; Bacterial regulatory proteins, luxR family [PF00196.22]					0
ENBDON_00933_gene	SARSHI1M.gff3_genome	D										Cytochrome P450 [PF00067.25]					0
ENBDON_00934_gene	SARSHI1M.gff3_genome	E															0
ENBDON_00935_gene	SARSHI1M.gff3_genome	E															0
ENBDON_00936_gene	SARSHI1M.gff3_genome	D										Luciferase-like monooxygenase [PF00296.23]					0
ENBDON_00937_gene	SARSHI1M.gff3_genome	E															0
ENBDON_00938_gene	SARSHI1M.gff3_genome	E															0
ENBDON_00939_gene	SARSHI1M.gff3_genome	C	K02016	iron complex transport system substrate-binding protein								Periplasmic binding protein [PF01497.21]					0
ENBDON_00940_gene	SARSHI1M.gff3_genome	D										FecCD transport family [PF01032.21]					0
ENBDON_00941_gene	SARSHI1M.gff3_genome	C	K02013	iron complex transport system ATP-binding protein [EC:7.2.2.-]								ABC transporter [PF00005.30]					0
ENBDON_00942_gene	SARSHI1M.gff3_genome	E															0
ENBDON_00943_gene	SARSHI1M.gff3_genome	C	K08987	putative membrane protein								Protein of unknown function (DUF1304) [PF06993.15]					0
ENBDON_00944_gene	SARSHI1M.gff3_genome	E															0
ENBDON_00945_gene	SARSHI1M.gff3_genome	D										Bacterial regulatory proteins, luxR family [PF00196.22]					0
ENBDON_00946_gene	SARSHI1M.gff3_genome	C	K01286	D-alanyl-D-alanine carboxypeptidase [EC:3.4.16.4]	MER0096261	S12	MER0096261 - family S12 non-peptidase homologues (Rhodococcus jostii) [S12.UNW]#S12#{peptidase unit: 46-405}~source ABG98503~	TRUE	0.8	591	2.004e-188	Beta-lactamase [PF00144.27]					0
ENBDON_00947_gene	SARSHI1M.gff3_genome	D										Bacterial transcriptional regulator [PF01614.21]; IclR helix-turn-helix domain [PF09339.13]					0
ENBDON_00948_gene	SARSHI1M.gff3_genome	D										Amino acid permease [PF00324.24]; Amino acid permease [PF13520.9]					0
ENBDON_00949_gene	SARSHI1M.gff3_genome	D										Methylamine utilisation protein MauE [PF07291.14]					0
ENBDON_00950_gene	SARSHI1M.gff3_genome	D										AhpC/TSA family [PF00578.24]; Redoxin [PF08534.13]; Thioredoxin-like [PF13905.9]					0
ENBDON_00951_gene	SARSHI1M.gff3_genome	C	K15228	methylamine dehydrogenase light chain [EC:1.4.9.1]								Methylamine dehydrogenase, L chain [PF02975.17]					0
ENBDON_00952_gene	SARSHI1M.gff3_genome	E															0
ENBDON_00953_gene	SARSHI1M.gff3_genome	C	K22552	multicopper oxidase [EC:1.16.3.1]								Multicopper oxidase [PF07732.18]; Multicopper oxidase [PF07731.17]; Multicopper oxidase [PF00394.25]	AA1_1; AA1_3; AA1	AA1 Laccase / p-diphenol:oxygen oxidoreductase / ferroxidase (EC 1.10.3.2); ; ferroxidase (EC 1.10.3.-); Laccase-like multicopper oxidase (EC 1.10.3.-)	1.10.3.2; 1.10.3.2; 1.10.3.2,1.10.3.-	AA1.hmm	0
ENBDON_00954_gene	SARSHI1M.gff3_genome	C	K02638	plastocyanin								Copper binding proteins, plastocyanin/azurin family [PF00127.23]; Cupredoxin-like domain [PF13473.9]					0
ENBDON_00955_gene	SARSHI1M.gff3_genome	D										Cupredoxin-like domain [PF13473.9]; Copper binding proteins, plastocyanin/azurin family [PF00127.23]					0
ENBDON_00956_gene	SARSHI1M.gff3_genome	E															0
ENBDON_00957_gene	SARSHI1M.gff3_genome	C	K00432	glutathione peroxidase [EC:1.11.1.9]								Glutathione peroxidase [PF00255.22]					0
ENBDON_00958_gene	SARSHI1M.gff3_genome	C	K04719	5,6-dimethylbenzimidazole synthase [EC:1.13.11.79]								Nitroreductase family [PF00881.27]					0
ENBDON_00959_gene	SARSHI1M.gff3_genome	C	K06986	uncharacterized protein								Uncharacterized protein conserved in bacteria (DUF2334) [PF10096.12]					0
ENBDON_00960_gene	SARSHI1M.gff3_genome	C	K07077	uncharacterized protein								FAD binding domain [PF00890.27]; Lycopene cyclase protein [PF05834.15]					0
ENBDON_00961_gene	SARSHI1M.gff3_genome	D										Beta-lactamase superfamily domain [PF13483.9]; Beta-lactamase superfamily domain [PF12706.10]; Metallo-beta-lactamase superfamily [PF00753.30]					0
ENBDON_00962_gene	SARSHI1M.gff3_genome	D										Flavodoxin domain [PF12724.10]; Flavodoxin [PF00258.28]; Flavodoxin domain [PF12641.10]; Flavodoxin [PF12682.10]					0
ENBDON_00963_gene	SARSHI1M.gff3_genome	C	K03929	para-nitrobenzyl esterase [EC:3.1.1.-]	MER0280846	S09X	MER0280846 - family S9 unassigned peptidases (Streptomyces cattleya) [S09.UPW]#S09X#{peptidase unit: 7-365}~source YP_004919505~	FALSE	0.506	336	3.298e-99	Carboxylesterase family [PF00135.31]; BD-FAE [PF20434.1]; alpha/beta hydrolase fold [PF07859.16]; Prolyl oligopeptidase family [PF00326.24]					0
ENBDON_00964_gene	SARSHI1M.gff3_genome	E															0
ENBDON_00965_gene	SARSHI1M.gff3_genome	C	K17686	P-type Cu+ transporter [EC:7.2.2.8]								E1-E2 ATPase [PF00122.23]; haloacid dehalogenase-like hydrolase [PF00702.29]; Heavy-metal-associated domain [PF00403.29]					0
ENBDON_00966_gene	SARSHI1M.gff3_genome	D										Heavy-metal-associated domain [PF00403.29]					0
ENBDON_00967_gene	SARSHI1M.gff3_genome	D										Response regulator receiver domain [PF00072.27]; Histidine kinase-, DNA gyrase B-, and HSP90-like ATPase [PF02518.29]; His Kinase A (phospho-acceptor) domain [PF00512.28]; ANTAR domain [PF03861.17]					0
ENBDON_00968_gene	SARSHI1M.gff3_genome	C	K23264	phosphoribosylformylglycinamidine synthase subunit PurS [EC:6.3.5.3]								Phosphoribosylformylglycinamidine (FGAM) synthase [PF02700.17]					0
ENBDON_00969_gene	SARSHI1M.gff3_genome	C	K23265	phosphoribosylformylglycinamidine synthase subunit PurQ / glutaminase [EC:6.3.5.3 3.5.1.2]	MER0452031	C26	MER0452031 - family C26 unassigned peptidases (Rhodococcus erythropolis) [C26.UPW]#C26#{peptidase unit: 4-198}~source ZP_04388333~	TRUE	0.914	375	3.543e-117	CobB/CobQ-like glutamine amidotransferase domain [PF13507.9]; CobB/CobQ-like glutamine amidotransferase domain [PF07685.17]; DJ-1/PfpI family [PF01965.27]; Glutamine amidotransferase class-I [PF00117.31]					0
ENBDON_00970_gene	SARSHI1M.gff3_genome	D										Histidine kinase-, DNA gyrase B-, and HSP90-like ATPase [PF02518.29]; His Kinase A (phospho-acceptor) domain [PF00512.28]					0
ENBDON_00971_gene	SARSHI1M.gff3_genome	C	K02483	two-component system, OmpR family, response regulator								Response regulator receiver domain [PF00072.27]; Transcriptional regulatory protein, C terminal [PF00486.31]					0
ENBDON_00972_gene	SARSHI1M.gff3_genome	C	K08982	putative membrane protein													0
ENBDON_00973_gene	SARSHI1M.gff3_genome	C	K08995	putative membrane protein								Domain of unknown function (DUF305) [PF03713.16]; Domain of unknown function (DUF4142) [PF13628.9]					0
ENBDON_00974_gene	SARSHI1M.gff3_genome	C	K01533	P-type Cu2+ transporter [EC:7.2.2.9]								haloacid dehalogenase-like hydrolase [PF00702.29]; E1-E2 ATPase [PF00122.23]; haloacid dehalogenase-like hydrolase [PF12710.10]					0
ENBDON_00975_gene	SARSHI1M.gff3_genome	E															0
ENBDON_00976_gene	SARSHI1M.gff3_genome	D										Glyoxalase-like domain [PF18029.4]					0
ENBDON_00977_gene	SARSHI1M.gff3_genome	D										AAA ATPase domain [PF13191.9]					0
ENBDON_00978_gene	SARSHI1M.gff3_genome	C	K01267	aspartyl aminopeptidase [EC:3.4.11.21]	MER0189966	M18	MER0189966 - aspartyl aminopeptidase (Rhodococcus ruber) [M18.002]#M18#{peptidase unit: 9-428}~source ZP_22883114~	TRUE	0.958	848	4.331e-277	Aminopeptidase I zinc metalloprotease (M18) [PF02127.18]					0
ENBDON_00979_gene	SARSHI1M.gff3_genome	D										Putative restriction endonuclease [PF05685.15]					0
ENBDON_00980_gene	SARSHI1M.gff3_genome	C	K23269	phosphoribosylformylglycinamidine synthase subunit PurL [EC:6.3.5.3]								AIR synthase related protein, N-terminal domain [PF00586.27]; AIR synthase related protein, C-terminal domain [PF02769.25]; Formylglycinamide ribonucleotide amidotransferase linker domain [PF18072.4]					0
ENBDON_00981_gene	SARSHI1M.gff3_genome	D										Alpha/beta-hydrolase family [PF10081.12]; Alpha/beta-hydrolase family N-terminus [PF15420.9]					0
ENBDON_00982_gene	SARSHI1M.gff3_genome	C	K07052	CAAX protease family protein	MER0937266	M79	MER0937266 - family M79 unassigned peptidases (Rhodococcus sp. Chr-9) [M79.UPW]#M79#{peptidase unit: 88-196}~source A0A0B1RHC6~	FALSE	0.57	117	7.397e-28	Type II CAAX prenyl endopeptidase Rce1-like [PF02517.19]					0
ENBDON_00983_gene	SARSHI1M.gff3_genome	D										Bacterial SCP ortholog [PF17844.4]					0
ENBDON_00984_gene	SARSHI1M.gff3_genome	C	K00764	amidophosphoribosyltransferase [EC:2.4.2.14]	MER0226877	C44	MER0226877 - amidophosphoribosyltransferase precursor (Rhodococcus equi) [C44.001]#C44#{peptidase unit: 30-272}~source YP_004005640~	TRUE	0.905	461	2.356e-141	Glutamine amidotransferase domain [PF13522.9]; Glutamine amidotransferase domain [PF13537.9]; Phosphoribosyl transferase domain [PF00156.30]; Glutamine amidotransferases class-II [PF00310.24]					0
ENBDON_00985_gene	SARSHI1M.gff3_genome	C	K01933	phosphoribosylformylglycinamidine cyclo-ligase [EC:6.3.3.1]								AIR synthase related protein, N-terminal domain [PF00586.27]; AIR synthase related protein, C-terminal domain [PF02769.25]					0
ENBDON_00986_gene	SARSHI1M.gff3_genome	D										Protein of unknown function (DUF3073) [PF11273.11]					0
ENBDON_00987_gene	SARSHI1M.gff3_genome	D										L-asparaginase II [PF06089.15]					0
ENBDON_00988_gene	SARSHI1M.gff3_genome	E															0
ENBDON_00989_gene	SARSHI1M.gff3_genome	C	K06980	tRNA-modifying protein YgfZ								Aminomethyltransferase folate-binding domain [PF01571.24]					0
ENBDON_00990_gene	SARSHI1M.gff3_genome	C	K02619	4-amino-4-deoxychorismate lyase [EC:4.1.3.38]								Amino-transferase class IV [PF01063.22]					0
ENBDON_00991_gene	SARSHI1M.gff3_genome	C	K00425	cytochrome bd ubiquinol oxidase subunit I [EC:7.1.1.7]								Cytochrome bd terminal oxidase subunit I [PF01654.20]					0
ENBDON_00992_gene	SARSHI1M.gff3_genome	C	K00426	cytochrome bd ubiquinol oxidase subunit II [EC:7.1.1.7]								Cytochrome bd terminal oxidase subunit II [PF02322.18]					0
ENBDON_00993_gene	SARSHI1M.gff3_genome	C	K16013	ATP-binding cassette, subfamily C, bacterial CydD								ABC transporter [PF00005.30]					0
ENBDON_00994_gene	SARSHI1M.gff3_genome	C	K16012	ATP-binding cassette, subfamily C, bacterial CydC								ABC transporter [PF00005.30]					0
ENBDON_00996_gene	SARSHI1M.gff3_genome	C	K02168	choline/glycine/proline betaine transport protein								BCCT, betaine/carnitine/choline family transporter [PF02028.20]					0
ENBDON_00997_gene	SARSHI1M.gff3_genome	D										THAP4-like, heme-binding beta-barrel domain [PF08768.14]					0
ENBDON_00998_gene	SARSHI1M.gff3_genome	E															0
ENBDON_00999_gene	SARSHI1M.gff3_genome	D										Cutinase [PF01083.25]; PE-PPE domain [PF08237.14]	CE5	CE5 acetyl xylan esterase (EC 3.1.1.72); cutinase (EC 3.1.1.74)	3.1.1.3,3.1.1.72,3.1.1.74	CE5.hmm	0
ENBDON_01000_gene	SARSHI1M.gff3_genome	D										Protein of unknown function (DUF1416) [PF07210.15]; Carboxypeptidase regulatory-like domain [PF13620.9]					0
ENBDON_01001_gene	SARSHI1M.gff3_genome	C	K01011	thiosulfate/3-mercaptopyruvate sulfurtransferase [EC:2.8.1.1 2.8.1.2]								Rhodanese-like domain [PF00581.23]					0
ENBDON_01002_gene	SARSHI1M.gff3_genome	D										Domain of unknown function (DUF4395) [PF14340.9]					0
ENBDON_01003_gene	SARSHI1M.gff3_genome	D										Thioredoxin [PF00085.23]; Redoxin [PF08534.13]; Thioredoxin-like [PF13899.9]; Thioredoxin-like [PF13905.9]; Thioredoxin-like domain [PF13098.9]					0
ENBDON_01004_gene	SARSHI1M.gff3_genome	D										LmeA-like phospholipid-binding [PF11209.11]					0
ENBDON_01005_gene	SARSHI1M.gff3_genome	D										Transcriptional regulatory protein, C terminal [PF00486.31]					0
ENBDON_01006_gene	SARSHI1M.gff3_genome	C	K15520	mycothiol synthase [EC:2.3.1.189]								Acetyltransferase (GNAT) family [PF00583.28]; FR47-like protein [PF08445.13]; Acetyltransferase (GNAT) domain [PF13508.10]; Acetyltransferase (GNAT) domain [PF13673.10]; Acetyltransferase (GNAT) domain [PF13302.10]					0
ENBDON_01007_gene	SARSHI1M.gff3_genome	C	K02040	phosphate transport system substrate-binding protein								PBP superfamily domain [PF12849.10]					0
ENBDON_01008_gene	SARSHI1M.gff3_genome	C	K02037	phosphate transport system permease protein								Binding-protein-dependent transport system inner membrane component [PF00528.25]					0
ENBDON_01009_gene	SARSHI1M.gff3_genome	C	K02038	phosphate transport system permease protein								Binding-protein-dependent transport system inner membrane component [PF00528.25]					0
ENBDON_01010_gene	SARSHI1M.gff3_genome	C	K02036	phosphate transport system ATP-binding protein [EC:7.3.2.1]								ABC transporter [PF00005.30]					0
ENBDON_01011_gene	SARSHI1M.gff3_genome	C	K02039	phosphate transport system protein								PhoU domain [PF01895.22]					0
ENBDON_01012_gene	SARSHI1M.gff3_genome	C	K01005	polyisoprenyl-teichoic acid--peptidoglycan teichoic acid transferase [EC:2.7.8.-]								LytR_cpsA_psr family [PF03816.17]; LytR cell envelope-related transcriptional attenuator [PF13399.9]					0
ENBDON_01013_gene	SARSHI1M.gff3_genome	C	K05540	tRNA-dihydrouridine synthase B [EC:1.-.-.-]								Dihydrouridine synthase (Dus) [PF01207.20]					0
ENBDON_01014_gene	SARSHI1M.gff3_genome	C	K03921	acyl-[acyl-carrier-protein] desaturase [EC:1.14.19.2 1.14.19.11 1.14.19.26]								Fatty acid desaturase [PF03405.17]					0
ENBDON_01016_gene	SARSHI1M.gff3_genome	D										Bacterial protein of unknown function (DUF937) [PF06078.14]					0
ENBDON_01017_gene	SARSHI1M.gff3_genome	E															0
ENBDON_01018_gene	SARSHI1M.gff3_genome	E															0
ENBDON_01020_gene	SARSHI1M.gff3_genome	D										Bacterial regulatory proteins, tetR family [PF00440.26]					0
ENBDON_01025_gene	SARSHI1M.gff3_genome	D										Glycosyl transferases group 1 [PF00534.23]; Glycosyl transferases group 1 [PF13692.9]; Glycosyltransferase Family 4 [PF13439.9]; Glycosyl transferases group 1 [PF13524.9]; Glycosyl transferase 4-like domain [PF13579.9]	GT4; GT5	GT4 sucrose synthase (EC 2.4.1.13); sucrose-phosphate synthase (EC 2.4.1.14); alpha-glucosyltransferase (EC 2.4.1.52); lipopolysaccharide N-acetylglucosaminyltransferase (EC 2.4.1.56); phosphatidylinositol alpha-mannosyltransferase (EC 2.4.1.57); GDP-Man: Man1GlcNAc2-PP-dolichol alpha-1,3-mannosyltransferase (EC 2.4.1.132); GDP-Man: Man3GlcNAc2-PP-dolichol/Man4GlcNAc2-PP-dolichol alpha-1,2-mannos…	2.4.1.131,2.4.1.13,2.4.1.14,2.4.1.157,2.4.1.198,2.4.1.208,2.4.1.21,2.4.1.231,2.4.1.241,2.4.1.245,2.4.1.252,2.4.1.257,2.4.1.270,2.4.1.283,2.4.1.285,2.4.1.290,2.4.1.342,2.4.1.57,2.4.1.-,2.4.2.-,2.4.1.132; 2.4.1.11,2.4.1.183,2.4.1.21,2.4.1.-,2.4.1.242	GT4.hmm	0
ENBDON_01026_gene	SARSHI1M.gff3_genome	D										Methyltransferase domain [PF13489.9]; Methyltransferase domain [PF08241.15]; ubiE/COQ5 methyltransferase family [PF01209.21]; Methyltransferase domain [PF13649.9]; Methyltransferase domain [PF13847.9]; Tellurite resistance protein TehB [PF03848.17]; Methyltransferase domain [PF08242.15]; Mycolic acid cyclopropane synthetase [PF02353.23]					0
ENBDON_01027_gene	SARSHI1M.gff3_genome	D										Bacterial alpha-L-rhamnosidase 6 hairpin glycosidase domain [PF17389.5]; Glycosyl-hydrolase family 116, catalytic region [PF04685.16]					0
ENBDON_01028_gene	SARSHI1M.gff3_genome	C	K24288	MMP 1-O-methyltransferase [EC:2.1.1.365]								Methyltransferase domain [PF13578.9]					0
ENBDON_01029_gene	SARSHI1M.gff3_genome	D										Enoyl-(Acyl carrier protein) reductase [PF13561.9]; short chain dehydrogenase [PF00106.28]; KR domain [PF08659.13]					0
ENBDON_01030_gene	SARSHI1M.gff3_genome	C	K01607	4-carboxymuconolactone decarboxylase [EC:4.1.1.44]													0
ENBDON_01031_gene	SARSHI1M.gff3_genome	D										NAD binding domain of 6-phosphogluconate dehydrogenase [PF03446.18]; NAD-binding of NADP-dependent 3-hydroxyisobutyrate dehydrogenase [PF14833.9]					0
ENBDON_01032_gene	SARSHI1M.gff3_genome	D										Enoyl-(Acyl carrier protein) reductase [PF13561.9]; short chain dehydrogenase [PF00106.28]					0
ENBDON_01033_gene	SARSHI1M.gff3_genome	D										Aldehyde dehydrogenase family [PF00171.25]					0
ENBDON_01034_gene	SARSHI1M.gff3_genome	D										Tetracyclin repressor-like, C-terminal domain [PF13305.9]					0
ENBDON_01035_gene	SARSHI1M.gff3_genome	C	K15981	cholest-4-en-3-one 26-monooxygenase [EC:1.14.15.29]								Cytochrome P450 [PF00067.25]					0
ENBDON_01036_gene	SARSHI1M.gff3_genome	C	K22107	TetR/AcrR family transcriptional regulator, cholesterol catabolism regulator								Tetracyclin repressor-like, C-terminal domain [PF17925.4]; Bacterial regulatory proteins, tetR family [PF00440.26]					0
ENBDON_01037_gene	SARSHI1M.gff3_genome	D										Cytochrome P450 [PF00067.25]					0
ENBDON_01038_gene	SARSHI1M.gff3_genome	D										short chain dehydrogenase [PF00106.28]; Enoyl-(Acyl carrier protein) reductase [PF13561.9]; KR domain [PF08659.13]					0
ENBDON_01039_gene	SARSHI1M.gff3_genome	C	K05917	sterol 14alpha-demethylase [EC:1.14.14.154 1.14.15.36]								Cytochrome P450 [PF00067.25]					0
ENBDON_01040_gene	SARSHI1M.gff3_genome	C	K05337	ferredoxin								4Fe-4S single cluster domain [PF13459.9]; 4Fe-4S single cluster domain of Ferredoxin I [PF13370.9]; Divergent 4Fe-4S mono-cluster [PF06902.14]					0
ENBDON_01041_gene	SARSHI1M.gff3_genome	E															0
ENBDON_01042_gene	SARSHI1M.gff3_genome	E															0
ENBDON_01043_gene	SARSHI1M.gff3_genome	C	K16051	3-oxo-5alpha-steroid 4-dehydrogenase [EC:1.3.99.5]								FAD binding domain [PF00890.27]; FAD dependent oxidoreductase [PF12831.10]; FAD dependent oxidoreductase [PF01266.27]					0
ENBDON_01044_gene	SARSHI1M.gff3_genome	D										Luciferase-like monooxygenase [PF00296.23]					0
ENBDON_01045_gene	SARSHI1M.gff3_genome	C	K22107	TetR/AcrR family transcriptional regulator, cholesterol catabolism regulator								Tetracyclin repressor-like, C-terminal domain [PF17925.4]; Bacterial regulatory proteins, tetR family [PF00440.26]					0
ENBDON_01046_gene	SARSHI1M.gff3_genome	E															0
ENBDON_01047_gene	SARSHI1M.gff3_genome	D										Putative methionine and alanine importer, small subunit [PF16951.8]					0
ENBDON_01048_gene	SARSHI1M.gff3_genome	C	K03308	neurotransmitter:Na+ symporter, NSS family								Sodium:neurotransmitter symporter family [PF00209.21]					0
ENBDON_01049_gene	SARSHI1M.gff3_genome	C	K20468	putative heme transporter								Lysylphosphatidylglycerol synthase TM region [PF03706.16]					0
ENBDON_01050_gene	SARSHI1M.gff3_genome	C	K15781	putative phosphoserine phosphatase / 1-acylglycerol-3-phosphate O-acyltransferase [EC:3.1.3.3 2.3.1.51]								Acyltransferase [PF01553.24]; haloacid dehalogenase-like hydrolase [PF12710.10]					0
ENBDON_01051_gene	SARSHI1M.gff3_genome	C	K00631	glycerol-3-phosphate O-acyltransferase [EC:2.3.1.15]								Glycerol-3-phosphate acyltransferase C-terminal region [PF19277.2]; Acyltransferase [PF01553.24]					0
ENBDON_01052_gene	SARSHI1M.gff3_genome	C	K07028	uncharacterized protein								AAA domain [PF13671.9]					0
ENBDON_01053_gene	SARSHI1M.gff3_genome	C	K22736	vacuolar iron transporter family protein								VIT family [PF01988.22]					0
ENBDON_01054_gene	SARSHI1M.gff3_genome	D										Universal stress protein family [PF00582.29]					0
ENBDON_01055_gene	SARSHI1M.gff3_genome	C	K13953	alcohol dehydrogenase, propanol-preferring [EC:1.1.1.1]								Alcohol dehydrogenase GroES-like domain [PF08240.15]; Zinc-binding dehydrogenase [PF00107.29]					0
ENBDON_01056_gene	SARSHI1M.gff3_genome	C	K18446	triphosphatase [EC:3.6.1.25]								CHAD domain [PF05235.17]; CYTH domain [PF01928.24]					0
ENBDON_01057_gene	SARSHI1M.gff3_genome	C	K00230	menaquinone-dependent protoporphyrinogen oxidase [EC:1.3.5.3]								Flavodoxin domain [PF12724.10]					0
ENBDON_01058_gene	SARSHI1M.gff3_genome	E															0
ENBDON_01059_gene	SARSHI1M.gff3_genome	D										Activator of Hsp90 ATPase homolog 1-like protein [PF08327.14]; Polyketide cyclase / dehydrase and lipid transport [PF10604.12]					0
ENBDON_01060_gene	SARSHI1M.gff3_genome	C	K06177	tRNA pseudouridine32 synthase / 23S rRNA pseudouridine746 synthase [EC:5.4.99.28 5.4.99.29]								RNA pseudouridylate synthase [PF00849.25]					0
ENBDON_01061_gene	SARSHI1M.gff3_genome	D										Universal stress protein family [PF00582.29]					0
ENBDON_01062_gene	SARSHI1M.gff3_genome	C	K06402	stage IV sporulation protein FB [EC:3.4.24.-]	MER0897004	M50B	MER0897004 - subfamily M50B unassigned peptidases (Rhodococcus ruber) [M50.UPB]#M50B#{peptidase unit: 34-187}~source M2XVC6~	FALSE	0.908	294	2.562e-86	CBS domain [PF00571.31]					0
ENBDON_01063_gene	SARSHI1M.gff3_genome	D										Universal stress protein family [PF00582.29]					0
ENBDON_01064_gene	SARSHI1M.gff3_genome	C	K18851	diacylglycerol O-acyltransferase / trehalose O-mycolyltransferase [EC:2.3.1.20 2.3.1.122]	MER0174045	S09X	MER0174045 - family S9 non-peptidase homologues (Rhodococcus opacus) [S09.UNW]#S09X#{peptidase unit: 75-310}~source BAH53272~	TRUE	0.892	443	1.144e-138	Putative esterase [PF00756.23]; Prolyl oligopeptidase family [PF00326.24]; Esterase PHB depolymerase [PF10503.12]	CE1	CE1 acetyl xylan esterase (EC 3.1.1.72); cinnamoyl esterase (EC 3.1.1.-); feruloyl esterase (EC 3.1.1.73); carboxylesterase (EC 3.1.1.1); S-formylglutathione hydrolase (EC 3.1.2.12); diacylglycerol O-acyltransferase (EC 2.3.1.20); trehalose 6-O-mycolyltransferase (EC 2.3.1.122)	2.3.1.122,3.1.1.72,3.2.1.8,3.1.1.-,2.3.1.20	CE1.hmm	0
ENBDON_01065_gene	SARSHI1M.gff3_genome	D										short chain dehydrogenase [PF00106.28]; Enoyl-(Acyl carrier protein) reductase [PF13561.9]; KR domain [PF08659.13]					0
ENBDON_01066_gene	SARSHI1M.gff3_genome	D										short chain dehydrogenase [PF00106.28]; Enoyl-(Acyl carrier protein) reductase [PF13561.9]					0
ENBDON_01067_gene	SARSHI1M.gff3_genome	D										TrkA-N domain [PF02254.21]; Ion channel [PF07885.19]					0
ENBDON_01068_gene	SARSHI1M.gff3_genome	C	K03499	trk/ktr system potassium uptake protein													0
ENBDON_01069_gene	SARSHI1M.gff3_genome	C	K03498	trk/ktr system potassium uptake protein								Cation transport protein [PF02386.19]					0
ENBDON_01070_gene	SARSHI1M.gff3_genome	C	K23262	gas vesicle structural protein								Gas vesicle protein [PF00741.21]					0
ENBDON_01071_gene	SARSHI1M.gff3_genome	C	K00635	diacylglycerol O-acyltransferase / wax synthase [EC:2.3.1.20 2.3.1.75]								Wax ester synthase-like Acyl-CoA acyltransferase domain [PF03007.19]; WS/DGAT C-terminal domain [PF06974.16]					0
ENBDON_01072_gene	SARSHI1M.gff3_genome	C	K03727	ATP-dependent RNA helicase HelY [EC:3.6.4.-]								DSHCT (NUC185) domain [PF08148.15]; DEAD/DEAH box helicase [PF00270.32]; Helicase conserved C-terminal domain [PF00271.34]; Type III restriction enzyme, res subunit [PF04851.18]					0
ENBDON_01073_gene	SARSHI1M.gff3_genome	C	K04063	lipoyl-dependent peroxiredoxin [EC:1.11.1.28]								OsmC-like protein [PF02566.22]					0
ENBDON_01074_gene	SARSHI1M.gff3_genome	C	K23775	MarR family transcriptional regulator, organic hydroperoxide resistance regulator								Winged helix DNA-binding domain [PF13463.9]; MarR family [PF01047.25]; MarR family [PF12802.10]; Winged helix DNA-binding domain [PF13601.9]					0
ENBDON_01075_gene	SARSHI1M.gff3_genome	C	K03696	ATP-dependent Clp protease ATP-binding subunit ClpC								AAA domain (Cdc48 subfamily) [PF07724.17]; AAA lid domain [PF17871.4]; C-terminal, D2-small domain, of ClpB protein [PF10431.12]; AAA domain (dynein-related subfamily) [PF07728.17]; Torsin [PF06309.14]; ATPase family associated with various cellular activities (AAA) [PF00004.32]; MoxR domain in the MoxR-vWA-beta-propeller ternary systems [PF20030.2]; Sigma-54 interaction domain [PF00158.29]; Bact…					0
ENBDON_01076_gene	SARSHI1M.gff3_genome	C	K16146	maltokinase [EC:2.7.1.175]								Maltokinase N-terminal cap domain [PF18085.4]					0
ENBDON_01077_gene	SARSHI1M.gff3_genome	C	K05343	maltose alpha-D-glucosyltransferase / alpha-amylase [EC:5.4.99.16 3.2.1.1]								Alpha amylase, catalytic domain [PF00128.27]	GH13; GH13_10; GH13_14; GH13_16; GH13_17; GH13_18; GH13_19; GH13_1; GH13_20; GH13_21; GH13_23; GH13_29; GH13_2; GH13_30; GH13_31; GH13_32; GH13_35; GH13_36; GH13_37; GH13_39; GH13_3; GH13_40; GH13_41; GH13_4; GH13_6; GH13_9	GH13 alpha-amylase (EC 3.2.1.1); pullulanase (EC 3.2.1.41); cyclomaltodextrin glucanotransferase (EC 2.4.1.19); cyclomaltodextrinase (EC 3.2.1.54); trehalose-6-phosphate hydrolase (EC 3.2.1.93); oligo-alpha-glucosidase (EC 3.2.1.10); maltogenic amylase (EC 3.2.1.133); neopullulanase (EC 3.2.1.135); alpha-glucosidase (EC 3.2.1.20); maltotetraose-forming alpha-amylase (EC 3.2.1.60); isoamylase (EC …	2.4.1.25,2.4.1.-,3.2.1.1,3.2.1.133,3.2.1.135,3.2.1.20,3.2.1.2,3.2.1.41,3.2.1.54; 2.4.1.25,3.2.1.1,3.2.1.116; 3.2.1.1,3.2.1.141; 3.2.1.1,3.2.1.20,3.2.1.41,3.2.1.68; 5.4.99.16; 3.2.1.20,3.2.1.48; 2.4.1.329,2.4.1.352,2.4.1.359,2.4.1.7,2.4.1.-; 3.2.1.1,3.2.1.98; 2.4.1.19,2.4.1.-,3.2.1.116,3.2.1.133,3.2.1.1; 3.2.1.1,3.2.1.133,3.2.1.135,3.2.1.41,3.2.1.54,3.2.1.-; 3.2.1.20; 2.4.1.-,3.2.1.10,3.2.1.20,3.2…	GH13_16.hmm	0
ENBDON_01078_gene	SARSHI1M.gff3_genome	C	K01626	3-deoxy-7-phosphoheptulonate synthase [EC:2.5.1.54]								DAHP synthetase I family [PF00793.23]					0
ENBDON_01079_gene	SARSHI1M.gff3_genome	D										Glycosyltransferase like family 2 [PF13641.9]; Glycosyl transferase family 2 [PF00535.29]; Glycosyltransferase like family 2 [PF10111.12]; Glycosyl transferase family group 2 [PF13632.9]	GT2_Glycos_transf_2; GT2_Glyco_tranf_2_3	GT2 cellulose synthase (EC 2.4.1.12); chitin synthase (EC 2.4.1.16); dolichyl-phosphate beta-D-mannosyltransferase (EC 2.4.1.83); dolichyl-phosphate beta-glucosyltransferase (EC 2.4.1.117); N-acetylglucosaminyltransferase (EC 2.4.1.-); N-acetylgalactosaminyltransferase (EC 2.4.1.-); hyaluronan synthase (EC 2.4.1.212); chitin oligosaccharide synthase (EC 2.4.1.-); beta-1,3-glucan synthase (EC 2.4.…		GT2_Glycos_transf_2.hmm	0
ENBDON_01080_gene	SARSHI1M.gff3_genome	C	K10674	ectoine hydroxylase [EC:1.14.11.55]								Phytanoyl-CoA dioxygenase (PhyH) [PF05721.16]					0
ENBDON_01081_gene	SARSHI1M.gff3_genome	D										Alcohol dehydrogenase GroES-like domain [PF08240.15]; Zinc-binding dehydrogenase [PF00107.29]; Zinc-binding dehydrogenase [PF13602.9]					1
ENBDON_01082_gene	SARSHI1M.gff3_genome	D										Glyoxalase-like domain [PF18029.4]					0
ENBDON_01083_gene	SARSHI1M.gff3_genome	D										Arabinose-binding domain of AraC transcription regulator, N-term [PF12625.10]; Helix-turn-helix domain [PF12833.10]; Bacterial regulatory helix-turn-helix proteins, AraC family [PF00165.26]					0
ENBDON_01084_gene	SARSHI1M.gff3_genome	C	K14267	N-succinyldiaminopimelate aminotransferase [EC:2.6.1.17]								Aminotransferase class I and II [PF00155.24]; Cys/Met metabolism PLP-dependent enzyme [PF01053.23]; DegT/DnrJ/EryC1/StrS aminotransferase family [PF01041.20]					0
ENBDON_01085_gene	SARSHI1M.gff3_genome	E															0
ENBDON_01086_gene	SARSHI1M.gff3_genome	C	K07032	uncharacterized protein								Glyoxalase-like domain [PF12681.10]; Glyoxalase/Bleomycin resistance protein/Dioxygenase superfamily [PF00903.28]; Glyoxalase-like domain [PF18029.4]					0
ENBDON_01087_gene	SARSHI1M.gff3_genome	C	K03088	RNA polymerase sigma-70 factor, ECF subfamily								Sigma-70 region 2 [PF04542.17]; Sigma-70, region 4 [PF08281.15]					0
ENBDON_01088_gene	SARSHI1M.gff3_genome	D										NMT1-like family [PF13379.9]; NMT1/THI5 like [PF09084.14]; NMT1-like family [PF16868.8]					0
ENBDON_01089_gene	SARSHI1M.gff3_genome	C	K02049	NitT/TauT family transport system ATP-binding protein								ABC transporter [PF00005.30]					0
ENBDON_01090_gene	SARSHI1M.gff3_genome	C	K15554	sulfonate transport system permease protein								Binding-protein-dependent transport system inner membrane component [PF00528.25]					0
ENBDON_01091_gene	SARSHI1M.gff3_genome	C	K24116	N-acetyl-S-(2-succino)cysteine monooxygenase [EC:1.14.-.-]								Luciferase-like monooxygenase [PF00296.23]					0
ENBDON_01092_gene	SARSHI1M.gff3_genome	D										Luciferase-like monooxygenase [PF00296.23]					0
ENBDON_01093_gene	SARSHI1M.gff3_genome	C	K03790	[ribosomal protein S5]-alanine N-acetyltransferase [EC:2.3.1.267]								Acetyltransferase (GNAT) domain [PF13302.10]					0
ENBDON_01094_gene	SARSHI1M.gff3_genome	D										Protein of unknown function (DUF3239) [PF11580.11]					0
ENBDON_01095_gene	SARSHI1M.gff3_genome	E															0
ENBDON_01096_gene	SARSHI1M.gff3_genome	E															0
ENBDON_01097_gene	SARSHI1M.gff3_genome	C	K03300	citrate-Mg2+:H+ or citrate-Ca2+:H+ symporter, CitMHS family								Na+/H+ antiporter family [PF03553.17]					0
ENBDON_01098_gene	SARSHI1M.gff3_genome	C	K02476	two-component system, CitB family, sensor kinase [EC:2.7.13.3]								Single cache domain 3 [PF17203.7]; Histidine kinase-, DNA gyrase B-, and HSP90-like ATPase [PF02518.29]; GHKL domain [PF14501.9]; Sensor_kinase_SpoOB-type, alpha-helical domain [PF14689.9]					0
ENBDON_01099_gene	SARSHI1M.gff3_genome	D										Response regulator receiver domain [PF00072.27]					0
ENBDON_01100_gene	SARSHI1M.gff3_genome	C	K10843	DNA excision repair protein ERCC-3 [EC:5.6.2.4]								ERCC3/RAD25/XPB C-terminal helicase [PF16203.8]; Helicase conserved C-terminal domain [PF13625.9]; Type III restriction enzyme, res subunit [PF04851.18]; SNF2-related domain [PF00176.26]					0
ENBDON_01101_gene	SARSHI1M.gff3_genome	D										Helicase conserved C-terminal domain [PF13625.9]; WYL domain [PF13280.9]					0
ENBDON_01102_gene	SARSHI1M.gff3_genome	E															0
ENBDON_01103_gene	SARSHI1M.gff3_genome	C	K21687	resuscitation-promoting factor RpfA								Transglycosylase-like domain [PF06737.17]; Resuscitation-promoting factor Rpf1, C-terminal [PF11574.11]					0
ENBDON_01104_gene	SARSHI1M.gff3_genome	D										Inner membrane component domain [PF03733.16]					0
ENBDON_01105_gene	SARSHI1M.gff3_genome	E															0
ENBDON_01106_gene	SARSHI1M.gff3_genome	C	K03704	cold shock protein								'Cold-shock' DNA-binding domain [PF00313.25]					0
ENBDON_01107_gene	SARSHI1M.gff3_genome	D										Protein of unknown function (DUF2771) [PF10969.11]					0
ENBDON_01108_gene	SARSHI1M.gff3_genome	E															0
ENBDON_01109_gene	SARSHI1M.gff3_genome	C	K22757	glutaminyl-peptide cyclotransferase [EC:2.3.2.5]								Glutamine cyclotransferase [PF05096.15]					0
ENBDON_01110_gene	SARSHI1M.gff3_genome	D										Protein of unknown function (DUF3027) [PF11228.11]					0
ENBDON_01111_gene	SARSHI1M.gff3_genome	E															0
ENBDON_01112_gene	SARSHI1M.gff3_genome	C	K19302	undecaprenyl-diphosphatase [EC:3.6.1.27]								PAP2 superfamily [PF01569.24]; PAP2 superfamily [PF14378.9]					0
ENBDON_01113_gene	SARSHI1M.gff3_genome	D										Protein of unknown function (DUF2530) [PF10745.12]					0
ENBDON_01114_gene	SARSHI1M.gff3_genome	C	K06901	adenine/guanine/hypoxanthine permease								Permease family [PF00860.23]					0
ENBDON_01115_gene	SARSHI1M.gff3_genome	D										MarR family [PF01047.25]; Winged helix DNA-binding domain [PF13463.9]; MarR family [PF12802.10]					0
ENBDON_01116_gene	SARSHI1M.gff3_genome	D										SpoU rRNA Methylase family [PF00588.22]					0
ENBDON_01117_gene	SARSHI1M.gff3_genome	D										Protein of unknown function (DUF2537) [PF10801.11]					0
ENBDON_01118_gene	SARSHI1M.gff3_genome	E															0
ENBDON_01119_gene	SARSHI1M.gff3_genome	D										Protein of unknown function (DUF3071) [PF11268.11]					0
ENBDON_01120_gene	SARSHI1M.gff3_genome	C	K00831	phosphoserine aminotransferase [EC:2.6.1.52]													0
ENBDON_01121_gene	SARSHI1M.gff3_genome	D										Citrate synthase, C-terminal domain [PF00285.24]					0
ENBDON_01122_gene	SARSHI1M.gff3_genome	C	K00275	pyridoxamine 5'-phosphate oxidase [EC:1.4.3.5]								Pyridoxine 5'-phosphate oxidase C-terminal dimerisation region [PF10590.12]; Pyridoxamine 5'-phosphate oxidase [PF01243.23]; Pyridoxamine 5'-phosphate oxidase like [PF16242.8]; Pyridoxamine 5'-phosphate oxidase [PF12766.10]					0
ENBDON_01123_gene	SARSHI1M.gff3_genome	C	K08225	MFS transporter, ENTS family, enterobactin (siderophore) exporter								Transmembrane secretion effector [PF05977.16]; Major Facilitator Superfamily [PF07690.19]					0
ENBDON_01124_gene	SARSHI1M.gff3_genome	E															0
ENBDON_01125_gene	SARSHI1M.gff3_genome	D										Beta-lactamase superfamily domain [PF12706.10]; Beta-lactamase superfamily domain [PF13483.9]					0
ENBDON_01126_gene	SARSHI1M.gff3_genome	C	K01785	aldose 1-epimerase [EC:5.1.3.3]								Aldose 1-epimerase [PF01263.23]					0
ENBDON_01127_gene	SARSHI1M.gff3_genome	C	K01647	citrate synthase [EC:2.3.3.1]								Citrate synthase, C-terminal domain [PF00285.24]					0
ENBDON_01128_gene	SARSHI1M.gff3_genome	D										FKBP-type peptidyl-prolyl cis-trans isomerase [PF00254.31]					0
ENBDON_01129_gene	SARSHI1M.gff3_genome	E															0
ENBDON_01130_gene	SARSHI1M.gff3_genome	C	K07655	two-component system, OmpR family, sensor histidine kinase PrrB [EC:2.7.13.3]								Histidine kinase-, DNA gyrase B-, and HSP90-like ATPase [PF02518.29]; His Kinase A (phospho-acceptor) domain [PF00512.28]					0
ENBDON_01131_gene	SARSHI1M.gff3_genome	C	K07671	two-component system, OmpR family, response regulator PrrA								Response regulator receiver domain [PF00072.27]; Transcriptional regulatory protein, C terminal [PF00486.31]					0
ENBDON_01132_gene	SARSHI1M.gff3_genome	D										Tetracyclin repressor-like, C-terminal domain [PF17932.4]; Bacterial regulatory proteins, tetR family [PF00440.26]					0
ENBDON_01133_gene	SARSHI1M.gff3_genome	C	K20035	3-(methylsulfanyl)propanoyl-CoA dehydrogenase [EC:1.3.99.41]								Acetyl-CoA dehydrogenase C-terminal like [PF12806.10]; Acyl-CoA dehydrogenase, C-terminal domain [PF00441.27]; Acyl-CoA dehydrogenase, middle domain [PF02770.22]; Acyl-CoA dehydrogenase, N-terminal domain [PF02771.19]; Acyl-CoA dehydrogenase N terminal [PF12418.11]					0
ENBDON_01134_gene	SARSHI1M.gff3_genome	D										RibD C-terminal domain [PF01872.20]					0
ENBDON_01135_gene	SARSHI1M.gff3_genome	D										Tetracyclin repressor-like, C-terminal domain [PF17940.4]					0
ENBDON_01136_gene	SARSHI1M.gff3_genome	C	K03743	nicotinamide-nucleotide amidase [EC:3.5.1.42]								Competence-damaged protein [PF02464.20]					0
ENBDON_01137_gene	SARSHI1M.gff3_genome	C	K06048	glutamate---cysteine ligase / carboxylate-amine ligase [EC:6.3.2.2 6.3.-.-]								Glutamate-cysteine ligase family 2(GCS2) [PF04107.16]					0
ENBDON_01138_gene	SARSHI1M.gff3_genome	D										RibD C-terminal domain [PF01872.20]					0
ENBDON_01139_gene	SARSHI1M.gff3_genome	C	K07058	membrane protein								Virulence factor BrkB [PF03631.18]; Putative Actinobacterial Holin-X, holin superfamily III [PF07332.14]					0
ENBDON_01140_gene	SARSHI1M.gff3_genome	E															0
ENBDON_01141_gene	SARSHI1M.gff3_genome	D										Protein of unknown function (DUF559) [PF04480.15]					0
ENBDON_01142_gene	SARSHI1M.gff3_genome	C	K01908	propionyl-CoA synthetase [EC:6.2.1.17]								AMP-binding enzyme [PF00501.31]; Acetyl-coenzyme A synthetase N-terminus [PF16177.8]; AMP-binding enzyme C-terminal domain [PF13193.9]					0
ENBDON_01143_gene	SARSHI1M.gff3_genome	C	K04104	acyl-CoA carboxylase subunit beta [EC:6.4.1.-]								Carboxyl transferase domain [PF01039.25]					0
ENBDON_01144_gene	SARSHI1M.gff3_genome	C	K01992	ABC-2 type transport system permease protein													0
ENBDON_01145_gene	SARSHI1M.gff3_genome	C	K01990	ABC-2 type transport system ATP-binding protein								ABC transporter [PF00005.30]; Domain of unknown function (DUF4162) [PF13732.9]					0
ENBDON_01146_gene	SARSHI1M.gff3_genome	E															0
ENBDON_01147_gene	SARSHI1M.gff3_genome	C	K07729	putative transcriptional regulator								Helix-turn-helix domain [PF12844.10]; Helix-turn-helix [PF01381.25]; Helix-turn-helix domain [PF13560.9]					0
ENBDON_01148_gene	SARSHI1M.gff3_genome	C	K04762	ribosome-associated heat shock protein Hsp15								S4 domain [PF01479.28]					0
ENBDON_01149_gene	SARSHI1M.gff3_genome	D										ABC transporter [PF00005.30]					0
ENBDON_01150_gene	SARSHI1M.gff3_genome	C	K06221	2,5-diketo-D-gluconate reductase A [EC:1.1.1.346]								Aldo/keto reductase family [PF00248.24]					0
ENBDON_01151_gene	SARSHI1M.gff3_genome	D										Pyridoxamine 5'-phosphate oxidase [PF01243.23]; Pyridoxamine 5'-phosphate oxidase [PF12900.10]					0
ENBDON_01152_gene	SARSHI1M.gff3_genome	D			MER0962277	S01C	MER0962277 - subfamily S1C unassigned peptidases (Rhodococcus ruber) [S01.UPC]#S01C#{peptidase unit: 70-332}~source M2ZWU8~	TRUE	0.906	499	7.178e-158	Trypsin-like peptidase domain [PF13365.9]; PDZ domain [PF13180.9]; Peptidase family M50 [PF02163.25]					0
ENBDON_01153_gene	SARSHI1M.gff3_genome	D										Flavin-binding monooxygenase-like [PF00743.22]; Pyridine nucleotide-disulphide oxidoreductase [PF07992.17]; L-lysine 6-monooxygenase/L-ornithine 5-monooxygenase [PF13434.9]; NAD(P)-binding Rossmann-like domain [PF13450.9]					0
ENBDON_01154_gene	SARSHI1M.gff3_genome	D			MER0795563	I87	MER0795563 - family I87 unassigned peptidase inhibitors (Rhodococcus ruber) [I87.UPW]#I87#{inhibitor unit: 65-243}~source M2ZBY1~	FALSE	0.926	349	6.333e-107						0
ENBDON_01155_gene	SARSHI1M.gff3_genome	D										Arc-like DNA binding domain [PF03869.17]; CopG-like RHH_1 or ribbon-helix-helix domain, RHH_5 [PF07878.14]					0
ENBDON_01156_gene	SARSHI1M.gff3_genome	D			MER1073056	S49C	MER1073056 - subfamily S49C non-peptidase homologues () [S49.UNC]#S49C#{peptidase unit: 97-234}~source A0A0F5I0K0~	FALSE	0.306	64	7.225e-10	Enoyl-CoA hydratase/isomerase [PF00378.23]; Enoyl-CoA hydratase/isomerase [PF16113.8]					0
ENBDON_01157_gene	SARSHI1M.gff3_genome	C	K13985	N-acyl-phosphatidylethanolamine-hydrolysing phospholipase D [EC:3.1.4.54]								Beta-lactamase superfamily domain [PF12706.10]; Beta-lactamase superfamily domain [PF13483.9]; Metallo-beta-lactamase superfamily [PF00753.30]					0
ENBDON_01158_gene	SARSHI1M.gff3_genome	C	K07238	zinc transporter, ZIP family													0
ENBDON_01159_gene	SARSHI1M.gff3_genome	D										Sporulation protein YtfJ (Spore_YtfJ) [PF09579.13]					0
ENBDON_01160_gene	SARSHI1M.gff3_genome	D										LysR substrate binding domain [PF03466.23]; Bacterial regulatory helix-turn-helix protein, lysR family [PF00126.30]					0
ENBDON_01161_gene	SARSHI1M.gff3_genome	D										SnoaL-like domain [PF13474.9]; SnoaL-like domain [PF12680.10]					0
ENBDON_01162_gene	SARSHI1M.gff3_genome	C	K12952	cation-transporting P-type ATPase E [EC:7.2.2.-]								E1-E2 ATPase [PF00122.23]; haloacid dehalogenase-like hydrolase [PF00702.29]					0
ENBDON_01163_gene	SARSHI1M.gff3_genome	D										MT0933-like antitoxin protein [PF14013.9]					0
ENBDON_01164_gene	SARSHI1M.gff3_genome	D										MT0933-like antitoxin protein [PF14013.9]					0
ENBDON_01165_gene	SARSHI1M.gff3_genome	D										Bacterial regulatory proteins, tetR family [PF00440.26]; Tetracyclin repressor-like, C-terminal domain [PF17932.4]					0
ENBDON_01166_gene	SARSHI1M.gff3_genome	D			MER1073108	S49C	MER1073108 - subfamily S49C non-peptidase homologues (Deferribacter desulfuricans) [S49.UNC]#S49C#{peptidase unit: 109-219}~source D3P9A0~	FALSE	0.476	79	9.145e-15	Enoyl-CoA hydratase/isomerase [PF00378.23]; Enoyl-CoA hydratase/isomerase [PF16113.8]					0
ENBDON_01167_gene	SARSHI1M.gff3_genome	D										Tetracyclin repressor-like, C-terminal domain [PF17932.4]; Bacterial regulatory proteins, tetR family [PF00440.26]					0
ENBDON_01168_gene	SARSHI1M.gff3_genome	C	K00249	acyl-CoA dehydrogenase [EC:1.3.8.7]								Acyl-CoA dehydrogenase, C-terminal domain [PF00441.27]; Acyl-CoA dehydrogenase, middle domain [PF02770.22]; Acyl-CoA dehydrogenase, N-terminal domain [PF02771.19]					0
ENBDON_01169_gene	SARSHI1M.gff3_genome	C	K00252	glutaryl-CoA dehydrogenase [EC:1.3.8.6]								Acyl-CoA dehydrogenase, middle domain [PF02770.22]; Acyl-CoA dehydrogenase, C-terminal domain [PF00441.27]; Acyl-CoA dehydrogenase, N-terminal domain [PF02771.19]					0
ENBDON_01170_gene	SARSHI1M.gff3_genome	D										AMP-binding enzyme [PF00501.31]; AMP-binding enzyme C-terminal domain [PF13193.9]					0
ENBDON_01171_gene	SARSHI1M.gff3_genome	C	K07535	2-hydroxycyclohexanecarboxyl-CoA dehydrogenase [EC:1.1.1.-]								Enoyl-(Acyl carrier protein) reductase [PF13561.9]; short chain dehydrogenase [PF00106.28]; KR domain [PF08659.13]					0
ENBDON_01172_gene	SARSHI1M.gff3_genome	C	K01692	enoyl-CoA hydratase [EC:4.2.1.17]	MER1072342	S49C	MER1072342 - subfamily S49C non-peptidase homologues (Geomicrobium sp. JCM 19055) [S49.UNC]#S49C#{peptidase unit: 92-231}~source A0A061NBE0~	FALSE	0.709	202	1.367e-56	Enoyl-CoA hydratase/isomerase [PF00378.23]; Enoyl-CoA hydratase/isomerase [PF16113.8]					0
ENBDON_01173_gene	SARSHI1M.gff3_genome	E															0
ENBDON_01174_gene	SARSHI1M.gff3_genome	C	K05548	MFS transporter, AAHS family, benzoate transport protein								Sugar (and other) transporter [PF00083.27]; Major Facilitator Superfamily [PF07690.19]					0
ENBDON_01175_gene	SARSHI1M.gff3_genome	C	K00249	acyl-CoA dehydrogenase [EC:1.3.8.7]								Acyl-CoA dehydrogenase, C-terminal domain [PF00441.27]; Acyl-CoA dehydrogenase, middle domain [PF02770.22]; Acyl-CoA dehydrogenase, N-terminal domain [PF02771.19]					0
ENBDON_01176_gene	SARSHI1M.gff3_genome	C	K24163	monovalent cation/hydrogen antiporter								Sodium/hydrogen exchanger family [PF00999.24]					0
ENBDON_01177_gene	SARSHI1M.gff3_genome	D										Domain of unknown function (DUF4385) [PF14328.9]					0
ENBDON_01178_gene	SARSHI1M.gff3_genome	C	K02478	two-component system, LytTR family, sensor kinase [EC:2.7.13.3]								Histidine kinase [PF06580.16]; Histidine kinase-like ATPase domain [PF13581.9]					0
ENBDON_01179_gene	SARSHI1M.gff3_genome	C	K02477	two-component system, LytTR family, response regulator								Response regulator receiver domain [PF00072.27]; LytTr DNA-binding domain [PF04397.18]					0
ENBDON_01180_gene	SARSHI1M.gff3_genome	E															0
ENBDON_01181_gene	SARSHI1M.gff3_genome	C	K14393	cation/acetate symporter								Sodium:solute symporter family [PF00474.20]					0
ENBDON_01182_gene	SARSHI1M.gff3_genome	D										Protein of unknown function, DUF485 [PF04341.15]					0
ENBDON_01183_gene	SARSHI1M.gff3_genome	C	K14393	cation/acetate symporter								Sodium:solute symporter family [PF00474.20]					0
ENBDON_01184_gene	SARSHI1M.gff3_genome	E															0
ENBDON_01185_gene	SARSHI1M.gff3_genome	C	K01971	bifunctional non-homologous end joining protein LigD [EC:6.5.1.1]								DNA polymerase Ligase (LigD) [PF13298.9]; ATP dependent DNA ligase domain [PF01068.24]; ATP dependent DNA ligase C terminal region [PF04679.18]					0
ENBDON_01186_gene	SARSHI1M.gff3_genome	D										MerR HTH family regulatory protein [PF13411.9]; MerR family regulatory protein [PF00376.26]					0
ENBDON_01187_gene	SARSHI1M.gff3_genome	C	K06880	erythromycin esterase [EC:3.1.1.-]								Erythromycin esterase [PF05139.17]					0
ENBDON_01188_gene	SARSHI1M.gff3_genome	C	K21310	methanethiol S-methyltransferase [EC:2.1.1.334]								NnrU protein [PF07298.14]; Phospholipid methyltransferase [PF04191.16]; Protein of unknown function (DUF1295) [PF06966.15]					0
ENBDON_01189_gene	SARSHI1M.gff3_genome	C	K09771	small multidrug resistance family-3 protein								Uncharacterised BCR, YnfA/UPF0060 family [PF02694.18]					0
ENBDON_01190_gene	SARSHI1M.gff3_genome	E															0
ENBDON_01191_gene	SARSHI1M.gff3_genome	D										Amidohydrolase [PF04909.17]					0
ENBDON_01192_gene	SARSHI1M.gff3_genome	C	K00467	lactate 2-monooxygenase [EC:1.13.12.4]								FMN-dependent dehydrogenase [PF01070.21]; Conserved region in glutamate synthase [PF01645.20]; IMP dehydrogenase / GMP reductase domain [PF00478.28]; Nitronate monooxygenase [PF03060.18]					0
ENBDON_01193_gene	SARSHI1M.gff3_genome	D										Rhodanese-like domain [PF00581.23]					0
ENBDON_01194_gene	SARSHI1M.gff3_genome	E															0
ENBDON_01195_gene	SARSHI1M.gff3_genome	D										Metal-sensitive transcriptional repressor [PF02583.20]					0
ENBDON_01196_gene	SARSHI1M.gff3_genome	D										Domain of unknown function DUF302 [PF03625.17]					0
ENBDON_01197_gene	SARSHI1M.gff3_genome	C	K01783	ribulose-phosphate 3-epimerase [EC:5.1.3.1]								Ribulose-phosphate 3 epimerase family [PF00834.22]					0
ENBDON_01198_gene	SARSHI1M.gff3_genome	D										Clp amino terminal domain, pathogenicity island component [PF02861.23]					0
ENBDON_01199_gene	SARSHI1M.gff3_genome	E															0
ENBDON_01200_gene	SARSHI1M.gff3_genome	D										F420H(2)-dependent quinone reductase [PF04075.17]					0
ENBDON_01202_gene	SARSHI1M.gff3_genome	C	K07054	uncharacterized protein								Putative neutral zinc metallopeptidase [PF04228.16]					0
ENBDON_01203_gene	SARSHI1M.gff3_genome	D			MER0072591	M23B	MER0072591 - subfamily M23B unassigned peptidases (Rhodococcus jostii) [M23.UPB]#M23B#{peptidase unit: 96-251}~source YP_702233~	FALSE	0.74	216	1.852e-61	Peptidase family M23 [PF01551.25]					0
ENBDON_01204_gene	SARSHI1M.gff3_genome	D										Glutamate-cysteine ligase family 2(GCS2) [PF04107.16]					0
ENBDON_01205_gene	SARSHI1M.gff3_genome	D			MER0048189	M28X	MER0048189 - family M28 unassigned peptidases (Rhodococcus ruber) [M28.UPW]#M28X#{peptidase unit: 46-327}~source ZP_22882896~	TRUE	0.938	557	1.559e-170	Peptidase family M28 [PF04389.20]					0
ENBDON_01206_gene	SARSHI1M.gff3_genome	C	K05916	nitric oxide dioxygenase [EC:1.14.12.17]								Globin [PF00042.25]; Oxidoreductase FAD-binding domain [PF00970.27]; Oxidoreductase NAD-binding domain [PF00175.24]					0
ENBDON_01207_gene	SARSHI1M.gff3_genome	C	K13771	Rrf2 family transcriptional regulator, nitric oxide-sensitive transcriptional repressor								Iron-dependent Transcriptional regulator [PF02082.23]					0
ENBDON_01208_gene	SARSHI1M.gff3_genome	D										CBS domain [PF00571.31]					0
ENBDON_01209_gene	SARSHI1M.gff3_genome	D										Universal stress protein family [PF00582.29]					0
ENBDON_01210_gene	SARSHI1M.gff3_genome	C	K00320	5,10-methylenetetrahydromethanopterin reductase [EC:1.5.98.2]								Luciferase-like monooxygenase [PF00296.23]					0
ENBDON_01211_gene	SARSHI1M.gff3_genome	D										Universal stress protein family [PF00582.29]					0
ENBDON_01212_gene	SARSHI1M.gff3_genome	E															0
ENBDON_01213_gene	SARSHI1M.gff3_genome	C	K03921	acyl-[acyl-carrier-protein] desaturase [EC:1.14.19.2 1.14.19.11 1.14.19.26]								Fatty acid desaturase [PF03405.17]					0
ENBDON_01215_gene	SARSHI1M.gff3_genome	E															0
ENBDON_01216_gene	SARSHI1M.gff3_genome	C	K07695	two-component system, NarL family, response regulator DevR								Response regulator receiver domain [PF00072.27]; Bacterial regulatory proteins, luxR family [PF00196.22]					0
ENBDON_01217_gene	SARSHI1M.gff3_genome	C	K07682	two-component system, NarL family, sensor histidine kinase DevS [EC:2.7.13.3]								GAF domain [PF13185.9]; GAF domain [PF01590.29]; GAF domain [PF13492.9]; Histidine kinase [PF07730.16]					0
ENBDON_01218_gene	SARSHI1M.gff3_genome	C	K00763	nicotinate phosphoribosyltransferase [EC:6.3.4.21]								Nicotinate phosphoribosyltransferase (NAPRTase) family [PF04095.19]; Nicotinate phosphoribosyltransferase (NAPRTase) N-terminal domain [PF17767.4]; Quinolinate phosphoribosyl transferase, C-terminal domain [PF01729.22]; Nicotinate phosphoribosyltransferase C-terminal domain [PF17956.4]					0
ENBDON_01219_gene	SARSHI1M.gff3_genome	D										2OG-Fe dioxygenase [PF10014.12]					0
ENBDON_01220_gene	SARSHI1M.gff3_genome	D										Sugar (and other) transporter [PF00083.27]; Fungal trichothecene efflux pump (TRI12) [PF06609.16]					0
ENBDON_01221_gene	SARSHI1M.gff3_genome	C	K07020	uncharacterized protein	MER0227037	S09X	MER0227037 - family S9 unassigned peptidases (Rhodococcus equi) [S09.UPW]#S09X#{peptidase unit: 30-193}~source YP_004009128~	FALSE	0.635	207	3.49e-59	Alpha/beta hydrolase domain [PF20408.1]; Serine aminopeptidase, S33 [PF12146.11]					0
ENBDON_01222_gene	SARSHI1M.gff3_genome	D										Voltage-dependent anion channel [PF03595.20]					0
ENBDON_01223_gene	SARSHI1M.gff3_genome	C	K10563	formamidopyrimidine-DNA glycosylase [EC:3.2.2.23 4.2.99.18]								Formamidopyrimidine-DNA glycosylase N-terminal domain [PF01149.27]; Formamidopyrimidine-DNA glycosylase H2TH domain [PF06831.17]					0
ENBDON_01224_gene	SARSHI1M.gff3_genome	C	K00560	thymidylate synthase [EC:2.1.1.45]								Thymidylate synthase [PF00303.22]					0
ENBDON_01225_gene	SARSHI1M.gff3_genome	C	K00287	dihydrofolate reductase [EC:1.5.1.3]								Dihydrofolate reductase [PF00186.22]					0
ENBDON_01226_gene	SARSHI1M.gff3_genome	E															0
ENBDON_01227_gene	SARSHI1M.gff3_genome	C	K03929	para-nitrobenzyl esterase [EC:3.1.1.-]	MER0507547	S09X	MER0507547 - family S9 unassigned peptidases (Rhodococcus pyridinivorans) [S09.UPW]#S09X#{peptidase unit: 77-433}~source YP_008989414~	TRUE	0.736	526	5.059e-164	Carboxylesterase family [PF00135.31]; BD-FAE [PF20434.1]; alpha/beta hydrolase fold [PF07859.16]; Prolyl oligopeptidase family [PF00326.24]					0
ENBDON_01228_gene	SARSHI1M.gff3_genome	D										Transferase family [PF02458.18]					0
ENBDON_01229_gene	SARSHI1M.gff3_genome	D										Bacterial regulatory proteins, tetR family [PF00440.26]					0
ENBDON_01230_gene	SARSHI1M.gff3_genome	C	K09456	putative acyl-CoA dehydrogenase								Adaptive response protein AidB N-terminal domain [PF18158.4]; Acyl-CoA dehydrogenase, C-terminal domain [PF00441.27]; Acyl-CoA dehydrogenase, middle domain [PF02770.22]					0
ENBDON_01231_gene	SARSHI1M.gff3_genome	C	K03734	FAD:protein FMN transferase [EC:2.7.1.180]								ApbE family [PF02424.18]					0
ENBDON_01232_gene	SARSHI1M.gff3_genome	C	K01810	glucose-6-phosphate isomerase [EC:5.3.1.9]								Phosphoglucose isomerase [PF00342.22]					0
ENBDON_01233_gene	SARSHI1M.gff3_genome	C	K00135	succinate-semialdehyde dehydrogenase / glutarate-semialdehyde dehydrogenase [EC:1.2.1.16 1.2.1.79 1.2.1.20]								Aldehyde dehydrogenase family [PF00171.25]					0
ENBDON_01234_gene	SARSHI1M.gff3_genome	C	K04093	chorismate mutase [EC:5.4.99.5]								Chorismate mutase type II [PF01817.24]					0
ENBDON_01235_gene	SARSHI1M.gff3_genome	C	K03657	ATP-dependent DNA helicase UvrD/PcrA [EC:5.6.2.4]								UvrD/REP helicase N-terminal domain [PF00580.24]; UvrD-like helicase C-terminal domain [PF13361.9]; AAA domain [PF13245.9]; UvrD-like helicase C-terminal domain [PF13538.9]					0
ENBDON_01236_gene	SARSHI1M.gff3_genome	D			MER0404037	M23B	MER0404037 - subfamily M23B unassigned peptidases (Rhodococcus sp. JVH1) [M23.UPB]#M23B#{peptidase unit: 181-347}~source EJI95457~	FALSE	0.858	297	4.024e-88	Peptidase family M23 [PF01551.25]					0
ENBDON_01237_gene	SARSHI1M.gff3_genome	E															0
ENBDON_01238_gene	SARSHI1M.gff3_genome	C	K01903	succinyl-CoA synthetase beta subunit [EC:6.2.1.5]								ATP-grasp domain [PF08442.13]; CoA-ligase [PF00549.22]; Phosphoribosylglycinamide synthetase, ATP-grasp (A) domain [PF01071.22]; Carbamoyl-phosphate synthase L chain, ATP binding domain [PF02786.20]; ATP-grasp domain [PF13549.9]; RimK-like ATP-grasp domain [PF08443.14]					0
ENBDON_01239_gene	SARSHI1M.gff3_genome	C	K01902	succinyl-CoA synthetase alpha subunit [EC:6.2.1.5]								CoA-ligase [PF00549.22]; Succinyl-CoA ligase like flavodoxin domain [PF13607.9]; CoA binding domain [PF02629.22]					0
ENBDON_01240_gene	SARSHI1M.gff3_genome	D										Uncharacterized protein family UPF0029 [PF01205.22]					0
ENBDON_01241_gene	SARSHI1M.gff3_genome	D										Family of unknown function (DUF5336) [PF17270.5]					0
ENBDON_01242_gene	SARSHI1M.gff3_genome	C	K01992	ABC-2 type transport system permease protein								Family of unknown function (DUF6350) [PF19877.2]					0
ENBDON_01243_gene	SARSHI1M.gff3_genome	C	K11175	phosphoribosylglycinamide formyltransferase 1 [EC:2.1.2.2]								Formyl transferase [PF00551.22]					0
ENBDON_01244_gene	SARSHI1M.gff3_genome	C	K00602	phosphoribosylaminoimidazolecarboxamide formyltransferase / IMP cyclohydrolase [EC:2.1.2.3 3.5.4.10]								AICARFT/IMPCHase bienzyme [PF01808.21]; MGS-like domain [PF02142.25]; Phosphoribosylglycinamide synthetase, N domain [PF02844.18]					0
ENBDON_01245_gene	SARSHI1M.gff3_genome	E															0
ENBDON_01246_gene	SARSHI1M.gff3_genome	E															0
ENBDON_01247_gene	SARSHI1M.gff3_genome	D			MER0174076	S33	MER0174076 - family S33 unassigned peptidases (Rhodococcus opacus) [S33.UPW]#S33#{peptidase unit: 30-289}~source BAH53899~	TRUE	0.676	351	2.68e-107	Acetyl xylan esterase (AXE1) [PF05448.15]; Serine aminopeptidase, S33 [PF12146.11]; Prolyl oligopeptidase family [PF00326.24]; Abhydrolase family [PF12715.10]					0
ENBDON_01248_gene	SARSHI1M.gff3_genome	D										Domain of unknown function (DUF4126) [PF13548.9]					0
ENBDON_01249_gene	SARSHI1M.gff3_genome	C	K03405	magnesium chelatase subunit I [EC:6.6.1.1]								Magnesium chelatase, subunit ChlI [PF01078.24]; ATPase family associated with various cellular activities (AAA) [PF07726.14]; Sigma-54 interaction domain [PF00158.29]					0
ENBDON_01250_gene	SARSHI1M.gff3_genome	E															0
ENBDON_01251_gene	SARSHI1M.gff3_genome	E															0
ENBDON_01252_gene	SARSHI1M.gff3_genome	E															0
ENBDON_01253_gene	SARSHI1M.gff3_genome	C	K13936	malonate transporter and related proteins								Membrane transport protein [PF03547.21]					0
ENBDON_01254_gene	SARSHI1M.gff3_genome	C	K24968	GntR family transcriptional regulator, repressor of the phnDCE operon								UTRA domain [PF07702.16]; Bacterial regulatory proteins, gntR family [PF00392.24]					0
ENBDON_01255_gene	SARSHI1M.gff3_genome	D										FAD dependent oxidoreductase [PF01266.27]					0
ENBDON_01256_gene	SARSHI1M.gff3_genome	D										Haloacid dehalogenase-like hydrolase [PF13419.9]; haloacid dehalogenase-like hydrolase [PF00702.29]					0
ENBDON_01257_gene	SARSHI1M.gff3_genome	C	K02044	phosphonate transport system substrate-binding protein								ABC transporter, phosphonate, periplasmic substrate-binding protein [PF12974.10]					0
ENBDON_01258_gene	SARSHI1M.gff3_genome	C	K02041	phosphonate transport system ATP-binding protein [EC:7.3.2.2]								ABC transporter [PF00005.30]					0
ENBDON_01259_gene	SARSHI1M.gff3_genome	C	K02042	phosphonate transport system permease protein								Binding-protein-dependent transport system inner membrane component [PF00528.25]					0
ENBDON_01260_gene	SARSHI1M.gff3_genome	D										Alcohol dehydrogenase GroES-like domain [PF08240.15]; Glucose dehydrogenase C-terminus [PF16912.8]; Zinc-binding dehydrogenase [PF00107.29]; Alanine dehydrogenase/PNT, C-terminal domain [PF01262.24]					0
ENBDON_01261_gene	SARSHI1M.gff3_genome	D										Protein of unknown function (DUF559) [PF04480.15]; AbiEi antitoxin C-terminal domain [PF09407.13]; REase_MTES_1575 [PF18741.4]					0
ENBDON_01262_gene	SARSHI1M.gff3_genome	C	K02963	small subunit ribosomal protein S18								Ribosomal protein S18 [PF01084.23]					0
ENBDON_01263_gene	SARSHI1M.gff3_genome	C	K02954	small subunit ribosomal protein S14								Ribosomal protein S14p/S29e [PF00253.24]					0
ENBDON_01264_gene	SARSHI1M.gff3_genome	C	K02913	large subunit ribosomal protein L33								Ribosomal protein L33 [PF00471.23]					0
ENBDON_01265_gene	SARSHI1M.gff3_genome	C	K02902	large subunit ribosomal protein L28								Ribosomal L28 family [PF00830.22]					0
ENBDON_01266_gene	SARSHI1M.gff3_genome	D										CobW/HypB/UreG, nucleotide-binding domain [PF02492.22]; Cobalamin synthesis protein cobW C-terminal domain [PF07683.17]					0
ENBDON_01267_gene	SARSHI1M.gff3_genome	C	K02909	large subunit ribosomal protein L31								Ribosomal protein L31 [PF01197.21]					0
ENBDON_01268_gene	SARSHI1M.gff3_genome	C	K02911	large subunit ribosomal protein L32								Ribosomal L32p protein family [PF01783.26]					0
ENBDON_01269_gene	SARSHI1M.gff3_genome	C	K07669	two-component system, OmpR family, response regulator MprA								Response regulator receiver domain [PF00072.27]; Transcriptional regulatory protein, C terminal [PF00486.31]					0
ENBDON_01270_gene	SARSHI1M.gff3_genome	C	K07653	two-component system, OmpR family, sensor histidine kinase MprB [EC:2.7.13.3]								Histidine kinase-, DNA gyrase B-, and HSP90-like ATPase [PF02518.29]; His Kinase A (phospho-acceptor) domain [PF00512.28]; HAMP domain [PF00672.28]					0
ENBDON_01271_gene	SARSHI1M.gff3_genome	C	K08372	putative serine protease PepD [EC:3.4.21.-]	MER0962554	S01C	MER0962554 - subfamily S1C unassigned peptidases (Rhodococcus rhodochrous) [S01.UPC]#S01C#{peptidase unit: 146-399}~source W4AAU1~	TRUE	0.882	468	8.516e-146	Trypsin-like peptidase domain [PF13365.9]; PDZ domain [PF13180.9]; Peptidase family M50 [PF02163.25]					0
ENBDON_01272_gene	SARSHI1M.gff3_genome	D										Probable molybdopterin binding domain [PF00994.27]					0
ENBDON_01273_gene	SARSHI1M.gff3_genome	D										MspA [PF09203.14]					0
ENBDON_01274_gene	SARSHI1M.gff3_genome	D										MspA [PF09203.14]					0
ENBDON_01275_gene	SARSHI1M.gff3_genome	C	K03282	large conductance mechanosensitive channel								Large-conductance mechanosensitive channel, MscL [PF01741.21]					0
ENBDON_01276_gene	SARSHI1M.gff3_genome	C	K02279	pilus assembly protein CpaB								Chaperone for flagella basal body P-ring formation [PF13144.9]; Flp pilus assembly protein RcpC/CpaB [PF16976.8]; SAF domain [PF08666.15]					0
ENBDON_01277_gene	SARSHI1M.gff3_genome	E															0
ENBDON_01278_gene	SARSHI1M.gff3_genome	C	K01934	5-formyltetrahydrofolate cyclo-ligase [EC:6.3.3.2]								5-formyltetrahydrofolate cyclo-ligase family [PF01812.23]					0
ENBDON_01279_gene	SARSHI1M.gff3_genome	C	K00963	UTP--glucose-1-phosphate uridylyltransferase [EC:2.7.7.9]								Nucleotidyl transferase [PF00483.26]; MobA-like NTP transferase domain [PF12804.10]					0
ENBDON_01280_gene	SARSHI1M.gff3_genome	C	K03750	molybdopterin molybdotransferase [EC:2.10.1.1]								MoeA N-terminal region (domain I and II) [PF03453.20]; Probable molybdopterin binding domain [PF00994.27]; MoeA C-terminal region (domain IV) [PF03454.18]					0
ENBDON_01281_gene	SARSHI1M.gff3_genome	C	K03790	[ribosomal protein S5]-alanine N-acetyltransferase [EC:2.3.1.267]								Acetyltransferase (GNAT) domain [PF13302.10]; Acetyltransferase (GNAT) domain [PF13420.10]					0
ENBDON_01282_gene	SARSHI1M.gff3_genome	E															0
ENBDON_01283_gene	SARSHI1M.gff3_genome	D										ubiE/COQ5 methyltransferase family [PF01209.21]; Methyltransferase domain [PF13847.9]; Methyltransferase domain [PF08241.15]; Methyltransferase domain [PF13649.9]; Methyltransferase domain [PF13489.9]; Methyltransferase domain [PF08242.15]; Protein-L-isoaspartate(D-aspartate) O-methyltransferase (PCMT) [PF01135.22]; Methionine biosynthesis protein MetW [PF07021.15]; Methyltransferase small domain…					0
ENBDON_01284_gene	SARSHI1M.gff3_genome	D										Bacterial regulatory proteins, luxR family [PF00196.22]; MalT-like TPR region [PF17874.4]					0
ENBDON_01286_gene	SARSHI1M.gff3_genome	E															0
ENBDON_01287_gene	SARSHI1M.gff3_genome	D										short chain dehydrogenase [PF00106.28]; Enoyl-(Acyl carrier protein) reductase [PF13561.9]; KR domain [PF08659.13]					0
ENBDON_01288_gene	SARSHI1M.gff3_genome	C	K09814	hemin transport system ATP-binding protein [EC:7.6.2.-]								ABC transporter [PF00005.30]; RecF/RecN/SMC N terminal domain [PF02463.22]					0
ENBDON_01289_gene	SARSHI1M.gff3_genome	C	K09813	hemin transport system permease protein													0
ENBDON_01290_gene	SARSHI1M.gff3_genome	D										Histidine kinase [PF07730.16]; Histidine kinase-, DNA gyrase B-, and HSP90-like ATPase [PF02518.29]					0
ENBDON_01291_gene	SARSHI1M.gff3_genome	D										Response regulator receiver domain [PF00072.27]; Bacterial regulatory proteins, luxR family [PF00196.22]					0
ENBDON_01292_gene	SARSHI1M.gff3_genome	D										THAP4-like, heme-binding beta-barrel domain [PF08768.14]					0
ENBDON_01293_gene	SARSHI1M.gff3_genome	C	K01478	arginine deiminase [EC:3.5.3.6]								Arginine deiminase [PF02274.20]; N,N dimethylarginine dimethylhydrolase, eukaryotic [PF19420.2]					0
ENBDON_01294_gene	SARSHI1M.gff3_genome	C	K00537	arsenate reductase (glutaredoxin) [EC:1.20.4.1]								ArsC family [PF03960.18]					0
ENBDON_01295_gene	SARSHI1M.gff3_genome	D										Bacterial regulatory proteins, gntR family [PF00392.24]					0
ENBDON_01296_gene	SARSHI1M.gff3_genome	D										BCCT, betaine/carnitine/choline family transporter [PF02028.20]					0
ENBDON_01297_gene	SARSHI1M.gff3_genome	D										Methyltransferase domain [PF13489.9]; Methyltransferase domain [PF13847.9]; Methyltransferase domain [PF08242.15]; Protein-L-isoaspartate(D-aspartate) O-methyltransferase (PCMT) [PF01135.22]; Methyltransferase domain [PF08241.15]; Methyltransferase domain [PF13649.9]; ubiE/COQ5 methyltransferase family [PF01209.21]; Nodulation protein S (NodS) [PF05401.14]; Mycolic acid cyclopropane synthetase [P…					0
ENBDON_01298_gene	SARSHI1M.gff3_genome	C	K00728	dolichyl-phosphate-mannose-protein mannosyltransferase [EC:2.4.1.109]								Dolichyl-phosphate-mannose-protein mannosyltransferase [PF02366.21]; C-terminal four TMM region of protein-O-mannosyltransferase [PF16192.8]; Dolichyl-phosphate-mannose-protein mannosyltransferase [PF13231.9]	GT39	GT39 Dol-P-Man: protein alpha-mannosyltransferase (EC 2.4.1.109)	2.4.1.109	GT39.hmm	0
ENBDON_01299_gene	SARSHI1M.gff3_genome	C	K07056	16S rRNA (cytidine1402-2'-O)-methyltransferase [EC:2.1.1.198]								Tetrapyrrole (Corrin/Porphyrin) Methylases [PF00590.23]					0
ENBDON_01300_gene	SARSHI1M.gff3_genome	C	K03310	alanine or glycine:cation symporter, AGCS family								Sodium:alanine symporter family [PF01235.20]					0
ENBDON_01301_gene	SARSHI1M.gff3_genome	E															0
ENBDON_01302_gene	SARSHI1M.gff3_genome	D			MER0128096	S09X	MER0128096 - family S9 non-peptidase homologues (Streptosporangium roseum) [S09.UNW]#S09X#{peptidase unit: 919-1107}~source ACZ85584~	FALSE	0.259	75	9.327e-12	Neurobeachin beta propeller domain [PF20426.1]; Lactonase, 7-bladed beta-propeller [PF10282.12]; Anaphase-promoting complex subunit 4 WD40 domain [PF12894.10]; Eukaryotic translation initiation factor eIF2A [PF08662.14]; WD domain, G-beta repeat [PF00400.35]; Cytochrome D1 heme domain [PF02239.19]; WD40 region of Ge1, enhancer of mRNA-decapping protein [PF16529.8]					0
ENBDON_01303_gene	SARSHI1M.gff3_genome	D										chorismate binding enzyme [PF00425.21]					0
ENBDON_01304_gene	SARSHI1M.gff3_genome	C	K03088	RNA polymerase sigma-70 factor, ECF subfamily								Sigma-70 region 2 [PF04542.17]; Sigma-70, region 4 [PF08281.15]					0
ENBDON_01305_gene	SARSHI1M.gff3_genome	C	K03885	NADH:quinone reductase (non-electrogenic) [EC:1.6.5.9]								Pyridine nucleotide-disulphide oxidoreductase [PF07992.17]					0
ENBDON_01306_gene	SARSHI1M.gff3_genome	D										Protein of unknown function (DUF2786) [PF10979.11]					0
ENBDON_01307_gene	SARSHI1M.gff3_genome	C	K01874	methionyl-tRNA synthetase [EC:6.1.1.10]								tRNA synthetases class I (M) [PF09334.14]; Anticodon binding domain of methionyl tRNA ligase [PF19303.2]; tRNA synthetases class I (I, L, M and V) [PF00133.25]; tRNA synthetases class I (C) catalytic domain [PF01406.22]					0
ENBDON_01308_gene	SARSHI1M.gff3_genome	C	K03424	TatD DNase family protein [EC:3.1.21.-]								TatD related DNase [PF01026.24]					0
ENBDON_01309_gene	SARSHI1M.gff3_genome	C	K00217	maleylacetate reductase [EC:1.3.1.32]								Iron-containing alcohol dehydrogenase [PF00465.22]; Iron-containing alcohol dehydrogenase [PF13685.9]					0
ENBDON_01310_gene	SARSHI1M.gff3_genome	C	K06911	quercetin 2,3-dioxygenase [EC:1.13.11.24]								Pirin [PF02678.19]; Pirin C-terminal cupin domain [PF05726.16]					0
ENBDON_01311_gene	SARSHI1M.gff3_genome	C	K08234	glyoxylase I family protein								Glyoxalase/Bleomycin resistance protein/Dioxygenase superfamily [PF00903.28]; Glyoxalase-like domain [PF12681.10]; Glyoxalase/Bleomycin resistance protein/Dioxygenase superfamily [PF13669.9]; Glyoxalase-like domain [PF18029.4]					0
ENBDON_01312_gene	SARSHI1M.gff3_genome	C	K15977	putative oxidoreductase								DoxX [PF07681.15]					0
ENBDON_01313_gene	SARSHI1M.gff3_genome	C	K02028	polar amino acid transport system ATP-binding protein [EC:7.4.2.1]								ABC transporter [PF00005.30]; RecF/RecN/SMC N terminal domain [PF02463.22]					0
ENBDON_01314_gene	SARSHI1M.gff3_genome	C	K10037	glutamine transport system permease protein								Bacterial extracellular solute-binding proteins, family 3 [PF00497.23]; Ligated ion channel L-glutamate- and glycine-binding site [PF10613.12]					0
ENBDON_01315_gene	SARSHI1M.gff3_genome	C	K21688	resuscitation-promoting factor RpfB								Transglycosylase-like domain [PF06737.17]; G5 domain [PF07501.15]					0
ENBDON_01316_gene	SARSHI1M.gff3_genome	E															0
ENBDON_01317_gene	SARSHI1M.gff3_genome	C	K02528	16S rRNA (adenine1518-N6/adenine1519-N6)-dimethyltransferase [EC:2.1.1.182]								Ribosomal RNA adenine dimethylase [PF00398.23]					0
ENBDON_01318_gene	SARSHI1M.gff3_genome	C	K03704	cold shock protein								'Cold-shock' DNA-binding domain [PF00313.25]					0
ENBDON_01319_gene	SARSHI1M.gff3_genome	C	K03704	cold shock protein								'Cold-shock' DNA-binding domain [PF00313.25]					0
ENBDON_01320_gene	SARSHI1M.gff3_genome	D										WYL domain [PF13280.9]; HTH domain [PF08279.15]					0
ENBDON_01321_gene	SARSHI1M.gff3_genome	C	K00919	4-diphosphocytidyl-2-C-methyl-D-erythritol kinase [EC:2.7.1.148]								GHMP kinases N terminal domain [PF00288.29]					0
ENBDON_01322_gene	SARSHI1M.gff3_genome	C	K15738	ABC transport system ATP-binding/permease protein								ABC transporter [PF00005.30]					0
ENBDON_01323_gene	SARSHI1M.gff3_genome	C	K08299	crotonobetainyl-CoA hydratase [EC:4.2.1.149]	MER1073240	S49C	MER1073240 - subfamily S49C non-peptidase homologues (Acinetobacter bohemicus) [S49.UNC]#S49C#{peptidase unit: 84-212}~source N8Q6E4~	FALSE	0.448	86	5.321e-17	Enoyl-CoA hydratase/isomerase [PF00378.23]; Enoyl-CoA hydratase/isomerase [PF16113.8]					0
ENBDON_01324_gene	SARSHI1M.gff3_genome	D										Thiolase-like protein type 1 additional C-terminal domain [PF18313.4]					0
ENBDON_01325_gene	SARSHI1M.gff3_genome	D										Tetracyclin repressor-like, C-terminal domain [PF16859.8]; Bacterial regulatory proteins, tetR family [PF00440.26]					0
ENBDON_01326_gene	SARSHI1M.gff3_genome	D										SnoaL-like domain [PF13577.9]					0
ENBDON_01327_gene	SARSHI1M.gff3_genome	C	K04750	PhnB protein								Glyoxalase-like domain [PF18029.4]; Glyoxalase-like domain [PF12681.10]; 3-demethylubiquinone-9 3-methyltransferase [PF06983.16]					0
ENBDON_01328_gene	SARSHI1M.gff3_genome	C	K01692	enoyl-CoA hydratase [EC:4.2.1.17]								Enoyl-CoA hydratase/isomerase [PF16113.8]; Enoyl-CoA hydratase/isomerase [PF00378.23]					0
ENBDON_01329_gene	SARSHI1M.gff3_genome	E															0
ENBDON_01330_gene	SARSHI1M.gff3_genome	C	K02837	peptide chain release factor 3								Class II release factor RF3, C-terminal domain [PF16658.8]; Elongation factor Tu GTP binding domain [PF00009.30]					0
ENBDON_01331_gene	SARSHI1M.gff3_genome	D										AMP-binding enzyme [PF00501.31]; AMP-binding enzyme C-terminal domain [PF14535.9]					0
ENBDON_01332_gene	SARSHI1M.gff3_genome	C	K01056	peptidyl-tRNA hydrolase, PTH1 family [EC:3.1.1.29]								Peptidyl-tRNA hydrolase [PF01195.22]					0
ENBDON_01333_gene	SARSHI1M.gff3_genome	C	K02897	large subunit ribosomal protein L25								Ribosomal L25p family [PF01386.22]; Ribosomal protein TL5, C-terminal domain [PF14693.9]					0
ENBDON_01334_gene	SARSHI1M.gff3_genome	C	K16051	3-oxo-5alpha-steroid 4-dehydrogenase [EC:1.3.99.5]								FAD binding domain [PF00890.27]; FAD dependent oxidoreductase [PF12831.10]					0
ENBDON_01335_gene	SARSHI1M.gff3_genome	D										Aminotransferase class-V [PF00266.22]					0
ENBDON_01336_gene	SARSHI1M.gff3_genome	D										Amino acid permease [PF00324.24]; Amino acid permease [PF13520.9]					0
ENBDON_01337_gene	SARSHI1M.gff3_genome	C	K01919	glutamate--cysteine ligase [EC:6.3.2.2]								Glutamate-cysteine ligase family 2(GCS2) [PF04107.16]					0
ENBDON_01338_gene	SARSHI1M.gff3_genome	C	K18912	gamma-glutamyl hercynylcysteine S-oxide synthase [EC:1.14.99.50]								Sulfatase-modifying factor enzyme 1 [PF03781.19]; DinB superfamily [PF12867.10]					0
ENBDON_01339_gene	SARSHI1M.gff3_genome	C	K07008	gamma-glutamyl hercynylcysteine S-oxide hydrolase [EC:3.5.1.118]	MER0174084	C44	MER0174084 - family C44 unassigned peptidases (Rhodococcus opacus) [C44.UPW]#C44#{peptidase unit: 2-166}~source BAH54018~	FALSE	0.695	230	1.109e-66	Glutamine amidotransferases class-II [PF13230.9]					0
ENBDON_01340_gene	SARSHI1M.gff3_genome	C	K18911	L-histidine Nalpha-methyltransferase [EC:2.1.1.44]								Histidine-specific methyltransferase, SAM-dependent [PF10017.12]					0
ENBDON_01341_gene	SARSHI1M.gff3_genome	E															0
ENBDON_01342_gene	SARSHI1M.gff3_genome	D										Major Facilitator Superfamily [PF07690.19]					0
ENBDON_01343_gene	SARSHI1M.gff3_genome	D										ubiE/COQ5 methyltransferase family [PF01209.21]; Methyltransferase domain [PF08241.15]; Methyltransferase domain [PF13489.9]; Methyltransferase domain [PF13847.9]; Methyltransferase domain [PF13649.9]; Methyltransferase domain [PF08242.15]; Nodulation protein S (NodS) [PF05401.14]; Protein-L-isoaspartate(D-aspartate) O-methyltransferase (PCMT) [PF01135.22]					0
ENBDON_01344_gene	SARSHI1M.gff3_genome	C	K03556	LuxR family transcriptional regulator, maltose regulon positive regulatory protein								Bacterial regulatory proteins, luxR family [PF00196.22]; AAA domain [PF13401.9]					0
ENBDON_01345_gene	SARSHI1M.gff3_genome	E															0
ENBDON_01346_gene	SARSHI1M.gff3_genome	D										Conserved hypothetical protein (DUF2461) [PF09365.13]					0
ENBDON_01347_gene	SARSHI1M.gff3_genome	C	K00948	ribose-phosphate pyrophosphokinase [EC:2.7.6.1]								N-terminal domain of ribose phosphate pyrophosphokinase [PF13793.9]; Phosphoribosyl synthetase-associated domain [PF14572.9]; Phosphoribosyl transferase domain [PF00156.30]					0
ENBDON_01348_gene	SARSHI1M.gff3_genome	C	K04042	bifunctional UDP-N-acetylglucosamine pyrophosphorylase / glucosamine-1-phosphate N-acetyltransferase [EC:2.7.7.23 2.3.1.157]								Nucleotidyl transferase [PF00483.26]; MobA-like NTP transferase domain [PF12804.10]; 2-C-methyl-D-erythritol 4-phosphate cytidylyltransferase [PF01128.22]					0
ENBDON_01350_gene	SARSHI1M.gff3_genome	D										Tetracyclin repressor-like, C-terminal domain [PF19344.2]; Bacterial regulatory proteins, tetR family [PF00440.26]; Tetracyclin repressor-like, C-terminal domain [PF17932.4]					0
ENBDON_01351_gene	SARSHI1M.gff3_genome	D										Bacterial regulatory proteins, tetR family [PF00440.26]					0
ENBDON_01352_gene	SARSHI1M.gff3_genome	D										Helix-turn-helix domain [PF12728.10]					0
ENBDON_01353_gene	SARSHI1M.gff3_genome	D										PIN domain [PF13470.9]					0
ENBDON_01354_gene	SARSHI1M.gff3_genome	C	K03723	transcription-repair coupling factor (superfamily II helicase) [EC:5.6.2.4]								UvrB interaction domain [PF17757.4]; TRCF domain [PF03461.18]; CarD-like/TRCF domain [PF02559.19]; Helicase conserved C-terminal domain [PF00271.34]					0
ENBDON_01355_gene	SARSHI1M.gff3_genome	D										MazG nucleotide pyrophosphohydrolase domain [PF03819.20]					0
ENBDON_01356_gene	SARSHI1M.gff3_genome	C	K01845	glutamate-1-semialdehyde 2,1-aminomutase [EC:5.4.3.8]								Aminotransferase class-III [PF00202.24]					0
ENBDON_01357_gene	SARSHI1M.gff3_genome	D										Polysaccharide pyruvyl transferase [PF04230.16]					0
ENBDON_01358_gene	SARSHI1M.gff3_genome	D										Acetyltransferase (GNAT) domain [PF13302.10]					0
ENBDON_01359_gene	SARSHI1M.gff3_genome	D										NUBPL iron-transfer P-loop NTPase [PF10609.12]					0
ENBDON_01360_gene	SARSHI1M.gff3_genome	D										O-Antigen ligase [PF04932.18]					0
ENBDON_01361_gene	SARSHI1M.gff3_genome	D										Glycosyl transferases group 1 [PF00534.23]; Glycosyl transferases group 1 [PF13692.9]; Glycosyl transferase 4-like domain [PF13579.9]; Glycosyltransferase Family 4 [PF13439.9]	GT4	GT4 sucrose synthase (EC 2.4.1.13); sucrose-phosphate synthase (EC 2.4.1.14); alpha-glucosyltransferase (EC 2.4.1.52); lipopolysaccharide N-acetylglucosaminyltransferase (EC 2.4.1.56); phosphatidylinositol alpha-mannosyltransferase (EC 2.4.1.57); GDP-Man: Man1GlcNAc2-PP-dolichol alpha-1,3-mannosyltransferase (EC 2.4.1.132); GDP-Man: Man3GlcNAc2-PP-dolichol/Man4GlcNAc2-PP-dolichol alpha-1,2-mannos…	2.4.1.131,2.4.1.13,2.4.1.14,2.4.1.157,2.4.1.198,2.4.1.208,2.4.1.21,2.4.1.231,2.4.1.241,2.4.1.245,2.4.1.252,2.4.1.257,2.4.1.270,2.4.1.283,2.4.1.285,2.4.1.290,2.4.1.342,2.4.1.57,2.4.1.-,2.4.2.-,2.4.1.132	GT4.hmm	0
ENBDON_01362_gene	SARSHI1M.gff3_genome	C	K15521	D-inositol-3-phosphate glycosyltransferase [EC:2.4.1.250]								Glycosyl transferases group 1 [PF00534.23]; Glycosyl transferases group 1 [PF13692.9]; Glycosyltransferase Family 4 [PF13439.9]; Glycosyl transferases group 1 [PF13524.9]; Glycosyl transferase 4-like domain [PF13579.9]	GT4; GT5	GT4 sucrose synthase (EC 2.4.1.13); sucrose-phosphate synthase (EC 2.4.1.14); alpha-glucosyltransferase (EC 2.4.1.52); lipopolysaccharide N-acetylglucosaminyltransferase (EC 2.4.1.56); phosphatidylinositol alpha-mannosyltransferase (EC 2.4.1.57); GDP-Man: Man1GlcNAc2-PP-dolichol alpha-1,3-mannosyltransferase (EC 2.4.1.132); GDP-Man: Man3GlcNAc2-PP-dolichol/Man4GlcNAc2-PP-dolichol alpha-1,2-mannos…	2.4.1.131,2.4.1.13,2.4.1.14,2.4.1.157,2.4.1.198,2.4.1.208,2.4.1.21,2.4.1.231,2.4.1.241,2.4.1.245,2.4.1.252,2.4.1.257,2.4.1.270,2.4.1.283,2.4.1.285,2.4.1.290,2.4.1.342,2.4.1.57,2.4.1.-,2.4.2.-,2.4.1.132; 2.4.1.11,2.4.1.183,2.4.1.21,2.4.1.-,2.4.1.242	GT4.hmm	0
ENBDON_01363_gene	SARSHI1M.gff3_genome	D										Glycosyl transferases group 1 [PF00534.23]; Glycosyl transferases group 1 [PF13692.9]; Glycosyl transferase 4-like domain [PF13579.9]; Glycosyl transferase 4-like [PF13477.9]; Glycosyl transferases group 1 [PF13524.9]					0
ENBDON_01364_gene	SARSHI1M.gff3_genome	D										Hypothetical glycosyl hydrolase family 15 [PF14885.9]					0
ENBDON_01365_gene	SARSHI1M.gff3_genome	D										Heparinase II/III N-terminus [PF16889.8]; Heparinase II/III-like protein [PF07940.16]	PL12; PL12_3	PL12 heparin-sulfate lyase (EC 4.2.2.8); heparin lyase / heparin lyase I (EC 4.2.2.7)		PL12_3.hmm	0
ENBDON_01366_gene	SARSHI1M.gff3_genome	C	K00066	GDP-mannose 6-dehydrogenase [EC:1.1.1.132]								UDP-glucose/GDP-mannose dehydrogenase family, NAD binding domain [PF03721.17]; UDP-glucose/GDP-mannose dehydrogenase family, central domain [PF00984.22]; UDP-glucose/GDP-mannose dehydrogenase family, UDP binding domain [PF03720.18]					0
ENBDON_01367_gene	SARSHI1M.gff3_genome	D										Glycosyltransferase like family 2 [PF13641.9]; Glycosyl transferase family 2 [PF00535.29]	GT2_Glycos_transf_2	GT2 cellulose synthase (EC 2.4.1.12); chitin synthase (EC 2.4.1.16); dolichyl-phosphate beta-D-mannosyltransferase (EC 2.4.1.83); dolichyl-phosphate beta-glucosyltransferase (EC 2.4.1.117); N-acetylglucosaminyltransferase (EC 2.4.1.-); N-acetylgalactosaminyltransferase (EC 2.4.1.-); hyaluronan synthase (EC 2.4.1.212); chitin oligosaccharide synthase (EC 2.4.1.-); beta-1,3-glucan synthase (EC 2.4.…		GT2_Glycos_transf_2.hmm	0
ENBDON_01368_gene	SARSHI1M.gff3_genome	D										Polysaccharide biosynthesis protein [PF13440.9]; Polysaccharide biosynthesis protein [PF01943.20]; Lipid II flippase MurJ [PF03023.17]					0
ENBDON_01369_gene	SARSHI1M.gff3_genome	D										DUF218 domain [PF02698.20]					0
ENBDON_01370_gene	SARSHI1M.gff3_genome	D										C-methyltransferase C-terminal domain [PF08484.14]; Putative zinc binding domain [PF08421.14]; Methyltransferase domain [PF13489.9]					0
ENBDON_01371_gene	SARSHI1M.gff3_genome	C	K01790	dTDP-4-dehydrorhamnose 3,5-epimerase [EC:5.1.3.13]								dTDP-4-dehydrorhamnose 3,5-epimerase [PF00908.20]					0
ENBDON_01372_gene	SARSHI1M.gff3_genome	D										NAD dependent epimerase/dehydratase family [PF01370.24]; GDP-mannose 4,6 dehydratase [PF16363.8]; RmlD substrate binding domain [PF04321.20]; 3-beta hydroxysteroid dehydrogenase/isomerase family [PF01073.22]; NmrA-like family [PF05368.16]; NAD(P)H-binding [PF13460.9]					0
ENBDON_01373_gene	SARSHI1M.gff3_genome	D										GlcNAc-PI de-N-acetylase [PF02585.20]					0
ENBDON_01374_gene	SARSHI1M.gff3_genome	C	K00978	glucose-1-phosphate cytidylyltransferase [EC:2.7.7.33]								Nucleotidyl transferase [PF00483.26]					0
ENBDON_01375_gene	SARSHI1M.gff3_genome	D										C-methyltransferase C-terminal domain [PF08484.14]; Putative zinc binding domain [PF08421.14]; Methyltransferase domain [PF13489.9]					0
ENBDON_01376_gene	SARSHI1M.gff3_genome	D										Integron-associated effector binding protein [PF14526.9]					0
ENBDON_01377_gene	SARSHI1M.gff3_genome	E															0
ENBDON_01378_gene	SARSHI1M.gff3_genome	E															0
ENBDON_01379_gene	SARSHI1M.gff3_genome	D										ThiF family [PF00899.24]; Nitroreductase family [PF00881.27]					0
ENBDON_01380_gene	SARSHI1M.gff3_genome	C	K21023	diguanylate cyclase [EC:2.7.7.65]								EAL domain [PF00563.23]; Diguanylate cyclase, GGDEF domain [PF00990.24]; Cation efflux system protein CusB domain 1 [PF00529.23]					0
ENBDON_01381_gene	SARSHI1M.gff3_genome	C	K16566	exopolysaccharide production protein ExoY								Bacterial sugar transferase [PF02397.19]					0
ENBDON_01382_gene	SARSHI1M.gff3_genome	C	K16301	deferrochelatase/peroxidase EfeB [EC:1.11.1.-]								Dyp-type peroxidase family [PF04261.15]					0
ENBDON_01383_gene	SARSHI1M.gff3_genome	C	K07224	iron uptake system component EfeO	MER0429484	M23B	MER0429484 - subfamily M23B unassigned peptidases (Staphylococcus pasteuri) [M23.UPB]#M23B#{peptidase unit: 37-266}~source YP_008759387~	FALSE	0.42	169	1.35e-43	Imelysin [PF09375.13]					0
ENBDON_01384_gene	SARSHI1M.gff3_genome	C	K07243	high-affinity iron transporter								Iron permease FTR1 family [PF03239.17]					0
ENBDON_01385_gene	SARSHI1M.gff3_genome	D										Transglycosylase SLT domain [PF13406.9]; Transglycosylase SLT domain [PF01464.23]	GH23	GH23 lysozyme type G (EC 3.2.1.17); peptidoglycan lyase (EC 4.2.2.n1) also known in the literature as peptidoglycan lytic transglycosylase; chitinase (EC 3.2.1.14)	3.2.1.17,3.2.1.17_or_4.2.2.n1,4.2.2.n1	GH23.hmm	0
ENBDON_01386_gene	SARSHI1M.gff3_genome	C	K01689	enolase [EC:4.2.1.11]								Enolase, C-terminal TIM barrel domain [PF00113.25]; Enolase, N-terminal domain [PF03952.19]					0
ENBDON_01387_gene	SARSHI1M.gff3_genome	D										Septum formation initiator [PF04977.18]					0
ENBDON_01388_gene	SARSHI1M.gff3_genome	C	K09009	uncharacterized protein								Protein of unknown function (DUF501) [PF04417.15]					0
ENBDON_01389_gene	SARSHI1M.gff3_genome	C	K01524	exopolyphosphatase / guanosine-5'-triphosphate,3'-diphosphate pyrophosphatase [EC:3.6.1.11 3.6.1.40]								Ppx/GppA phosphatase family [PF02541.19]					0
ENBDON_01391_gene	SARSHI1M.gff3_genome	E															0
ENBDON_01392_gene	SARSHI1M.gff3_genome	E															0
ENBDON_01393_gene	SARSHI1M.gff3_genome	E															0
ENBDON_01394_gene	SARSHI1M.gff3_genome	E															0
ENBDON_01395_gene	SARSHI1M.gff3_genome	E															0
ENBDON_01396_gene	SARSHI1M.gff3_genome	D										Alcohol dehydrogenase GroES-like domain [PF08240.15]; Zinc-binding dehydrogenase [PF00107.29]; Glucose dehydrogenase C-terminus [PF16912.8]					0
ENBDON_01397_gene	SARSHI1M.gff3_genome	D			MER0734565	C56	MER0734565 - family C56 unassigned peptidases (Rhodococcus ruber) [C56.UPW]#C56#{peptidase unit: 42-154}~source A0A098BRQ1~	FALSE	0.934	224	1.248e-64	ThiJ/PfpI family-like [PF17124.8]; DJ-1/PfpI family [PF01965.27]					0
ENBDON_01398_gene	SARSHI1M.gff3_genome	E															0
ENBDON_01399_gene	SARSHI1M.gff3_genome	D										Domain of unknown function (DUF4389) [PF14333.9]					0
ENBDON_01400_gene	SARSHI1M.gff3_genome	D										CsbD-like [PF05532.15]					0
ENBDON_01401_gene	SARSHI1M.gff3_genome	E															0
ENBDON_01402_gene	SARSHI1M.gff3_genome	C	K03284	magnesium transporter													0
ENBDON_01403_gene	SARSHI1M.gff3_genome	C	K13419	serine/threonine-protein kinase PknK [EC:2.7.11.1]								Protein kinase domain [PF00069.28]; Protein tyrosine and serine/threonine kinase [PF07714.20]; Fungal protein kinase [PF17667.4]; AAA ATPase domain [PF13191.9]; Lipopolysaccharide kinase (Kdo/WaaP) family [PF06293.17]					0
ENBDON_01404_gene	SARSHI1M.gff3_genome	E															0
ENBDON_01405_gene	SARSHI1M.gff3_genome	C	K00564	16S rRNA (guanine1207-N2)-methyltransferase [EC:2.1.1.172]								Methyltransferase small domain [PF05175.17]; Ribosomal protein L11 methyltransferase (PrmA) [PF06325.16]; Methyltransferase domain [PF13847.9]; Methyltransferase domain [PF13649.9]; Methyltransferase domain [PF08242.15]; Methyltransferase domain [PF08241.15]; Putative RNA methylase family UPF0020 [PF01170.21]; ubiE/COQ5 methyltransferase family [PF01209.21]; Mycolic acid cyclopropane synthetase […					0
ENBDON_01406_gene	SARSHI1M.gff3_genome	D										Bax inhibitor 1 like [PF12811.10]					0
ENBDON_01407_gene	SARSHI1M.gff3_genome	D										GDSL-like Lipase/Acylhydrolase family [PF13472.9]					0
ENBDON_01408_gene	SARSHI1M.gff3_genome	C	K01697	cystathionine beta-synthase [EC:4.2.1.22]								Pyridoxal-phosphate dependent enzyme [PF00291.28]					0
ENBDON_01409_gene	SARSHI1M.gff3_genome	C	K01739	cystathionine gamma-synthase [EC:2.5.1.48]								Cys/Met metabolism PLP-dependent enzyme [PF01053.23]; Aminotransferase class I and II [PF00155.24]; DegT/DnrJ/EryC1/StrS aminotransferase family [PF01041.20]					0
ENBDON_01410_gene	SARSHI1M.gff3_genome	D			MER0720216	C40	MER0720216 - family C40 unassigned peptidases (Rhodococcus ruber) [C40.UPW]#C40#{peptidase unit: 318-414}~source M2ZGM8~	FALSE	1	215	3.67e-58	NlpC/P60 family [PF00877.22]; Transglycosylase SLT domain [PF13406.9]; Transglycosylase SLT domain [PF01464.23]	GH23	GH23 lysozyme type G (EC 3.2.1.17); peptidoglycan lyase (EC 4.2.2.n1) also known in the literature as peptidoglycan lytic transglycosylase; chitinase (EC 3.2.1.14)	3.2.1.17,3.2.1.17_or_4.2.2.n1,4.2.2.n1	GH23.hmm	0
ENBDON_01411_gene	SARSHI1M.gff3_genome	C	K03624	transcription elongation factor GreA								Transcription elongation factor, N-terminal [PF03449.18]; Transcription elongation factor, GreA/GreB, C-term [PF01272.22]					0
ENBDON_01412_gene	SARSHI1M.gff3_genome	D										Domain of unknown function (DUF4307) [PF14155.9]					0
ENBDON_01413_gene	SARSHI1M.gff3_genome	C	K18455	mycothiol S-conjugate amidase [EC:3.5.1.115]								GlcNAc-PI de-N-acetylase [PF02585.20]	CE14	CE14 N-acetyl-1-D-myo-inosityl-2-amino-2-deoxy-alpha-D-glucopyranoside deacetylase (EC 3.5.1.89); diacetylchitobiose deacetylase (EC 3.5.1.-); mycothiol S-conjugate amidase (EC 3.5.1.-)	3.5.1.105,3.5.1.115,3.5.1.89,3.5.1.-	CE14.hmm	0
ENBDON_01414_gene	SARSHI1M.gff3_genome	E															0
ENBDON_01415_gene	SARSHI1M.gff3_genome	C	K06888	uncharacterized protein								Protein of unknown function, DUF255 [PF03190.18]; Thioredoxin-like [PF13899.9]					1
ENBDON_01416_gene	SARSHI1M.gff3_genome	C	K22044	moderate conductance mechanosensitive channel								Mechanosensitive ion channel [PF00924.21]					0
ENBDON_01417_gene	SARSHI1M.gff3_genome	C	K11068	hemolysin III								Haemolysin-III related [PF03006.23]					0
ENBDON_01418_gene	SARSHI1M.gff3_genome	C	K12503	short-chain Z-isoprenyl diphosphate synthase [EC:2.5.1.68]								Putative undecaprenyl diphosphate synthase [PF01255.22]					0
ENBDON_01419_gene	SARSHI1M.gff3_genome	C	K00867	type I pantothenate kinase [EC:2.7.1.33]								Phosphoribulokinase / Uridine kinase family [PF00485.21]					0
ENBDON_01420_gene	SARSHI1M.gff3_genome	E															0
ENBDON_01421_gene	SARSHI1M.gff3_genome	C	K00600	glycine hydroxymethyltransferase [EC:2.1.2.1]								Serine hydroxymethyltransferase [PF00464.22]					0
ENBDON_01422_gene	SARSHI1M.gff3_genome	C	K07175	PhoH-like ATPase								PhoH-like protein [PF02562.19]; PIN domain [PF13638.9]					0
ENBDON_01423_gene	SARSHI1M.gff3_genome	C	K01607	4-carboxymuconolactone decarboxylase [EC:4.1.1.44]								Carboxymuconolactone decarboxylase family [PF02627.23]					0
ENBDON_01424_gene	SARSHI1M.gff3_genome	C	K10533	limonene-1,2-epoxide hydrolase [EC:3.3.2.8]								Limonene-1,2-epoxide hydrolase catalytic domain [PF07858.15]; SnoaL-like domain [PF12680.10]; SnoaL-like polyketide cyclase [PF07366.15]					0
ENBDON_01425_gene	SARSHI1M.gff3_genome	D			MER1012111	S12	MER1012111 - family S12 unassigned peptidases (Rhodococcus aetherivorans) [S12.UPW]#S12#{peptidase unit: 67-394}~source A0A059MW73~	TRUE	0.918	631	4.909e-200	Beta-lactamase [PF00144.27]; Domain of unknown function (DUF3471) [PF11954.11]					0
ENBDON_01426_gene	SARSHI1M.gff3_genome	D										LGFP repeat [PF08310.14]					0
ENBDON_01427_gene	SARSHI1M.gff3_genome	C	K00344	NADPH:quinone reductase [EC:1.6.5.5]								Zinc-binding dehydrogenase [PF00107.29]; Zinc-binding dehydrogenase [PF13602.9]; Alcohol dehydrogenase GroES-like domain [PF08240.15]					0
ENBDON_01428_gene	SARSHI1M.gff3_genome	D										Enoyl-(Acyl carrier protein) reductase [PF13561.9]; short chain dehydrogenase [PF00106.28]; KR domain [PF08659.13]					0
ENBDON_01429_gene	SARSHI1M.gff3_genome	C	K00249	acyl-CoA dehydrogenase [EC:1.3.8.7]								Acyl-CoA dehydrogenase, C-terminal domain [PF00441.27]; Acyl-CoA dehydrogenase, middle domain [PF02770.22]; Acyl-CoA dehydrogenase, N-terminal domain [PF02771.19]					0
ENBDON_01430_gene	SARSHI1M.gff3_genome	D										MaoC like domain [PF01575.22]; N-terminal half of MaoC dehydratase [PF13452.9]					0
ENBDON_01431_gene	SARSHI1M.gff3_genome	D			MER0011529	M20X	MER0011529 - family M20 unassigned peptidases (Campylobacter jejuni) [M20.UPW]#M20X#{peptidase unit: 1-415}~source Q9S3L1~	FALSE	0.266	156	1.139e-38	Sugar (and other) transporter [PF00083.27]; Major Facilitator Superfamily [PF07690.19]					0
ENBDON_01432_gene	SARSHI1M.gff3_genome	C	K01897	long-chain acyl-CoA synthetase [EC:6.2.1.3]								AMP-binding enzyme [PF00501.31]; AMP-binding enzyme C-terminal domain [PF13193.9]					0
ENBDON_01433_gene	SARSHI1M.gff3_genome	C	K07048	phosphotriesterase-related protein								Phosphotriesterase family [PF02126.21]					0
ENBDON_01434_gene	SARSHI1M.gff3_genome	C	K01679	fumarate hydratase, class II [EC:4.2.1.2]								Lyase [PF00206.23]; Fumarase C C-terminus [PF10415.12]					0
ENBDON_01435_gene	SARSHI1M.gff3_genome	C	K02446	fructose-1,6-bisphosphatase II [EC:3.1.3.11]								Bacterial fructose-1,6-bisphosphatase, glpX-encoded [PF03320.16]					0
ENBDON_01436_gene	SARSHI1M.gff3_genome	D										Protein of unknown function (DUF4245) [PF14030.9]					0
ENBDON_01437_gene	SARSHI1M.gff3_genome	C	K03602	exodeoxyribonuclease VII small subunit [EC:3.1.11.6]								Exonuclease VII small subunit [PF02609.19]					0
ENBDON_01438_gene	SARSHI1M.gff3_genome	C	K03601	exodeoxyribonuclease VII large subunit [EC:3.1.11.6]								Exonuclease VII, large subunit [PF02601.18]; OB-fold nucleic acid binding domain [PF13742.9]					0
ENBDON_01439_gene	SARSHI1M.gff3_genome	E															0
ENBDON_01440_gene	SARSHI1M.gff3_genome	C	K03527	4-hydroxy-3-methylbut-2-en-1-yl diphosphate reductase [EC:1.17.7.4]								LytB protein [PF02401.21]					0
ENBDON_01441_gene	SARSHI1M.gff3_genome	D										Domain of unknown function (DUF6542) [PF20177.1]					0
ENBDON_01442_gene	SARSHI1M.gff3_genome	C	K09760	DNA recombination protein RmuC								RmuC family [PF02646.19]					0
ENBDON_01443_gene	SARSHI1M.gff3_genome	C	K03547	DNA repair protein SbcD/Mre11								Calcineurin-like phosphoesterase [PF00149.31]; Type 5 capsule protein repressor C-terminal domain [PF12320.11]; Calcineurin-like phosphoesterase superfamily domain [PF12850.10]					0
ENBDON_01444_gene	SARSHI1M.gff3_genome	C	K03546	DNA repair protein SbcC/Rad50								AAA domain [PF13476.9]; SbcC/RAD50-like, Walker B motif [PF13558.9]; AAA domain [PF13514.9]; P-loop containing region of AAA domain [PF13555.9]; RecF/RecN/SMC N terminal domain [PF02463.22]					0
ENBDON_01445_gene	SARSHI1M.gff3_genome	C	K20469	putative heme transporter								AI-2E family transporter [PF01594.19]					0
ENBDON_01446_gene	SARSHI1M.gff3_genome	E															0
ENBDON_01447_gene	SARSHI1M.gff3_genome	D										Methyltransferase domain [PF13649.9]; Methyltransferase domain [PF13489.9]; Methyltransferase domain [PF08241.15]; Tellurite resistance protein TehB [PF03848.17]; Methyltransferase domain [PF13847.9]; Nodulation protein S (NodS) [PF05401.14]; Mycolic acid cyclopropane synthetase [PF02353.23]; Protein-L-isoaspartate(D-aspartate) O-methyltransferase (PCMT) [PF01135.22]; Ribosomal protein L11 methyl…					0
ENBDON_01448_gene	SARSHI1M.gff3_genome	C	K06942	ribosome-binding ATPase								Protein of unknown function (DUF933) [PF06071.16]; 50S ribosome-binding GTPase [PF01926.26]; Ferrous iron transport protein B [PF02421.21]					0
ENBDON_01449_gene	SARSHI1M.gff3_genome	E															0
ENBDON_01451_gene	SARSHI1M.gff3_genome	E															0
ENBDON_01452_gene	SARSHI1M.gff3_genome	E															0
ENBDON_01453_gene	SARSHI1M.gff3_genome	E															0
ENBDON_01454_gene	SARSHI1M.gff3_genome	E															0
ENBDON_01455_gene	SARSHI1M.gff3_genome	E															0
ENBDON_01456_gene	SARSHI1M.gff3_genome	D										AAA domain [PF13481.9]; Bifunctional DNA primase/polymerase, N-terminal [PF09250.14]					0
ENBDON_01457_gene	SARSHI1M.gff3_genome	E															0
ENBDON_01458_gene	SARSHI1M.gff3_genome	E															0
ENBDON_01459_gene	SARSHI1M.gff3_genome	C	K14059	integrase								Phage integrase family [PF00589.25]; Phage integrase, N-terminal SAM-like domain [PF14659.9]					0
ENBDON_01460_gene	SARSHI1M.gff3_genome	D										Putative ATP-dependent DNA helicase recG C-terminal [PF13749.9]; Putative DNA-binding domain [PF04326.17]					0
ENBDON_01461_gene	SARSHI1M.gff3_genome	C	K06177	tRNA pseudouridine32 synthase / 23S rRNA pseudouridine746 synthase [EC:5.4.99.28 5.4.99.29]								RNA pseudouridylate synthase [PF00849.25]					0
ENBDON_01462_gene	SARSHI1M.gff3_genome	E															0
ENBDON_01463_gene	SARSHI1M.gff3_genome	D										Methyltransferase domain [PF13649.9]; Methyltransferase domain [PF13489.9]; Methyltransferase domain [PF08241.15]; Tellurite resistance protein TehB [PF03848.17]; Methyltransferase domain [PF13847.9]; Methyltransferase domain [PF08242.15]; ubiE/COQ5 methyltransferase family [PF01209.21]; Thiopurine S-methyltransferase (TPMT) [PF05724.14]; Protein-L-isoaspartate(D-aspartate) O-methyltransferase (P…					0
ENBDON_01464_gene	SARSHI1M.gff3_genome	D										F420H(2)-dependent quinone reductase [PF04075.17]					0
ENBDON_01465_gene	SARSHI1M.gff3_genome	E															0
ENBDON_01466_gene	SARSHI1M.gff3_genome	D										Sensory domain in DIguanylate Cyclases and Two-component system [PF10069.12]					0
ENBDON_01467_gene	SARSHI1M.gff3_genome	C	K00803	alkyldihydroxyacetonephosphate synthase [EC:2.5.1.26]								FAD linked oxidases, C-terminal domain [PF02913.22]; FAD binding domain [PF01565.26]					0
ENBDON_01468_gene	SARSHI1M.gff3_genome	D										PhoD-like phosphatase [PF09423.13]; PhoD related phosphatase [PF19050.3]					0
ENBDON_01469_gene	SARSHI1M.gff3_genome	E															0
ENBDON_01470_gene	SARSHI1M.gff3_genome	D										Activator of Hsp90 ATPase homolog 1-like protein [PF08327.14]; Polyketide cyclase / dehydrase and lipid transport [PF10604.12]					0
ENBDON_01471_gene	SARSHI1M.gff3_genome	D										Helix-turn-helix domain [PF12840.10]; Bacterial regulatory protein, arsR family [PF01022.23]					0
ENBDON_01472_gene	SARSHI1M.gff3_genome	D										Protein of unknown function (DUF2505) [PF10698.12]					0
ENBDON_01473_gene	SARSHI1M.gff3_genome	C	K03583	exodeoxyribonuclease V gamma subunit [EC:3.1.11.5]								Exodeoxyribonuclease V, gamma subunit [PF04257.17]; RecC C-terminal domain [PF17946.4]					0
ENBDON_01474_gene	SARSHI1M.gff3_genome	C	K03582	exodeoxyribonuclease V beta subunit [EC:3.1.11.5]								UvrD/REP helicase N-terminal domain [PF00580.24]; UvrD-like helicase C-terminal domain [PF13361.9]; AAA domain [PF13245.9]					0
ENBDON_01475_gene	SARSHI1M.gff3_genome	C	K03581	exodeoxyribonuclease V alpha subunit [EC:3.1.11.5]								AAA domain [PF13604.9]; AAA domain [PF13245.9]; UvrD-like helicase C-terminal domain [PF13538.9]; PIF1-like helicase [PF05970.17]; AAA domain [PF13086.9]					0
ENBDON_01476_gene	SARSHI1M.gff3_genome	C	K07222	putative flavoprotein involved in K+ transport								Flavin-binding monooxygenase-like [PF00743.22]; L-lysine 6-monooxygenase/L-ornithine 5-monooxygenase [PF13434.9]; Pyridine nucleotide-disulphide oxidoreductase [PF07992.17]; FAD-NAD(P)-binding [PF13454.9]; HI0933-like protein [PF03486.17]; NAD(P)-binding Rossmann-like domain [PF13450.9]					0
ENBDON_01477_gene	SARSHI1M.gff3_genome	D										Bacterial regulatory proteins, luxR family [PF00196.22]					0
ENBDON_01478_gene	SARSHI1M.gff3_genome	C	K02069	UDP-glucose/iron transport system permease protein								Uncharacterised protein family (UPF0014) [PF03649.16]					0
ENBDON_01479_gene	SARSHI1M.gff3_genome	D										Enoyl-(Acyl carrier protein) reductase [PF13561.9]; short chain dehydrogenase [PF00106.28]; KR domain [PF08659.13]					0
ENBDON_01480_gene	SARSHI1M.gff3_genome	E															0
ENBDON_01481_gene	SARSHI1M.gff3_genome	C	K07517	Delta3-Delta2-enoyl-CoA isomerase [EC:5.3.3.8]								Enoyl-CoA hydratase/isomerase [PF00378.23]; Enoyl-CoA hydratase/isomerase [PF16113.8]					0
ENBDON_01482_gene	SARSHI1M.gff3_genome	C	K10747	DNA ligase 1 [EC:6.5.1.1 6.5.1.6 6.5.1.7]								ATP dependent DNA ligase domain [PF01068.24]; DNA ligase N terminus [PF04675.17]; ATP dependent DNA ligase C terminal region [PF04679.18]					0
ENBDON_01483_gene	SARSHI1M.gff3_genome	C	K10112	multiple sugar transport system ATP-binding protein [EC:7.5.2.-]								ABC transporter [PF00005.30]; MalK OB fold domain [PF17912.4]					0
ENBDON_01484_gene	SARSHI1M.gff3_genome	C	K10229	polyol transport system permease protein								Binding-protein-dependent transport system inner membrane component [PF00528.25]					0
ENBDON_01485_gene	SARSHI1M.gff3_genome	C	K10228	polyol transport system permease protein								Binding-protein-dependent transport system inner membrane component [PF00528.25]					0
ENBDON_01486_gene	SARSHI1M.gff3_genome	C	K10227	polyol transport system substrate-binding protein								Bacterial extracellular solute-binding protein [PF01547.28]; Bacterial extracellular solute-binding protein [PF13416.9]					0
ENBDON_01487_gene	SARSHI1M.gff3_genome	C	K05346	deoxyribonucleoside regulator								Putative sugar-binding domain [PF04198.16]; Protein of unknown function DUF134 [PF02001.19]					0
ENBDON_01488_gene	SARSHI1M.gff3_genome	C	K00008	L-iditol 2-dehydrogenase [EC:1.1.1.14]								Glucose dehydrogenase C-terminus [PF16912.8]; Alcohol dehydrogenase GroES-like domain [PF08240.15]; Zinc-binding dehydrogenase [PF00107.29]; Zinc-binding dehydrogenase [PF13602.9]					0
ENBDON_01489_gene	SARSHI1M.gff3_genome	C	K00045	mannitol 2-dehydrogenase [EC:1.1.1.67]								Mannitol dehydrogenase C-terminal domain [PF08125.16]; Mannitol dehydrogenase Rossmann domain [PF01232.26]					0
ENBDON_01490_gene	SARSHI1M.gff3_genome	C	K00847	fructokinase [EC:2.7.1.4]								pfkB family carbohydrate kinase [PF00294.27]					0
ENBDON_01491_gene	SARSHI1M.gff3_genome	C	K00854	xylulokinase [EC:2.7.1.17]								FGGY family of carbohydrate kinases, N-terminal domain [PF00370.24]; FGGY family of carbohydrate kinases, C-terminal domain [PF02782.19]; Hsp70 protein [PF00012.23]					0
ENBDON_01492_gene	SARSHI1M.gff3_genome	E															0
ENBDON_01493_gene	SARSHI1M.gff3_genome	D										3-demethylubiquinone-9 3-methyltransferase [PF06983.16]					0
ENBDON_01494_gene	SARSHI1M.gff3_genome	C	K08369	MFS transporter, putative metabolite:H+ symporter								Sugar (and other) transporter [PF00083.27]; Major Facilitator Superfamily [PF07690.19]; Fungal trichothecene efflux pump (TRI12) [PF06609.16]; Transmembrane secretion effector [PF05977.16]; Uncharacterised MFS-type transporter YbfB [PF06779.17]					0
ENBDON_01495_gene	SARSHI1M.gff3_genome	D										Bacterial transcriptional regulator [PF01614.21]; IclR helix-turn-helix domain [PF09339.13]					0
ENBDON_01496_gene	SARSHI1M.gff3_genome	C	K02554	2-keto-4-pentenoate hydratase [EC:4.2.1.80]								Fumarylacetoacetate (FAA) hydrolase family [PF01557.21]					0
ENBDON_01497_gene	SARSHI1M.gff3_genome	C	K01617	2-oxo-3-hexenedioate decarboxylase [EC:4.1.1.77]								Fumarylacetoacetate (FAA) hydrolase family [PF01557.21]					0
ENBDON_01498_gene	SARSHI1M.gff3_genome	C	K01821	4-oxalocrotonate tautomerase [EC:5.3.2.6]								Tautomerase enzyme [PF01361.24]					0
ENBDON_01499_gene	SARSHI1M.gff3_genome	C	K14063	AraC family transcriptional regulator, positive regulator of tynA and feaB								AraC-binding-like domain [PF14525.9]; Helix-turn-helix domain [PF12833.10]; Bacterial regulatory helix-turn-helix proteins, AraC family [PF00165.26]					0
ENBDON_01500_gene	SARSHI1M.gff3_genome	C	K23526	aromatic O-demethylase, cytochrome P450 subunit [EC:1.14.14.-]								Cytochrome P450 [PF00067.25]					0
ENBDON_01501_gene	SARSHI1M.gff3_genome	D										Oxidoreductase FAD-binding domain [PF00970.27]; Oxidoreductase NAD-binding domain [PF00175.24]; 2Fe-2S iron-sulfur cluster binding domain [PF00111.30]					0
ENBDON_01502_gene	SARSHI1M.gff3_genome	C	K14063	AraC family transcriptional regulator, positive regulator of tynA and feaB								AraC-binding-like domain [PF14525.9]; Helix-turn-helix domain [PF12833.10]; Bacterial regulatory helix-turn-helix proteins, AraC family [PF00165.26]					0
ENBDON_01503_gene	SARSHI1M.gff3_genome	C	K00483	4-hydroxyphenylacetate 3-monooxygenase [EC:1.14.14.9]								4-hydroxyphenylacetate 3-hydroxylase N terminal [PF11794.11]; 4-hydroxyphenylacetate 3-hydroxylase C terminal [PF03241.16]					0
ENBDON_01504_gene	SARSHI1M.gff3_genome	D										Flavin reductase like domain [PF01613.21]					0
ENBDON_01505_gene	SARSHI1M.gff3_genome	C	K00635	diacylglycerol O-acyltransferase / wax synthase [EC:2.3.1.20 2.3.1.75]								Wax ester synthase-like Acyl-CoA acyltransferase domain [PF03007.19]; WS/DGAT C-terminal domain [PF06974.16]					0
ENBDON_01506_gene	SARSHI1M.gff3_genome	C	K01821	4-oxalocrotonate tautomerase [EC:5.3.2.6]								Tautomerase enzyme [PF01361.24]					0
ENBDON_01507_gene	SARSHI1M.gff3_genome	D										Enoyl-(Acyl carrier protein) reductase [PF13561.9]; short chain dehydrogenase [PF00106.28]					0
ENBDON_01508_gene	SARSHI1M.gff3_genome	D										Aldehyde dehydrogenase family [PF00171.25]					0
ENBDON_01509_gene	SARSHI1M.gff3_genome	C	K01666	4-hydroxy 2-oxovalerate aldolase [EC:4.1.3.39]								HMGL-like [PF00682.22]; DmpG-like communication domain [PF07836.14]					0
ENBDON_01510_gene	SARSHI1M.gff3_genome	D										Prokaryotic acetaldehyde dehydrogenase, dimerisation [PF09290.14]; Semialdehyde dehydrogenase, NAD binding domain [PF01118.27]					0
ENBDON_01511_gene	SARSHI1M.gff3_genome	C	K00446	catechol 2,3-dioxygenase [EC:1.13.11.2]													0
ENBDON_01512_gene	SARSHI1M.gff3_genome	E															0
ENBDON_01513_gene	SARSHI1M.gff3_genome	E															0
ENBDON_01514_gene	SARSHI1M.gff3_genome	D										HAD superfamily, subfamily IIIB (Acid phosphatase) [PF03767.17]					0
ENBDON_01515_gene	SARSHI1M.gff3_genome	C	K07482	transposase, IS30 family													0
ENBDON_01516_gene	SARSHI1M.gff3_genome	C	K01676	fumarate hydratase, class I [EC:4.2.1.2]								Fumarate hydratase (Fumerase) [PF05681.17]; Fumarase C-terminus [PF05683.15]					0
ENBDON_01517_gene	SARSHI1M.gff3_genome	C	K07052	CAAX protease family protein	MER0912549	M79	MER0912549 - family M79 unassigned peptidases (Rhodococcus ruber) [M79.UPW]#M79#{peptidase unit: 51-236}~source A0A098BU18~	TRUE	0.909	355	5.906e-110	Type II CAAX prenyl endopeptidase Rce1-like [PF02517.19]					0
ENBDON_01518_gene	SARSHI1M.gff3_genome	D										2'-5' RNA ligase superfamily [PF13563.9]					0
ENBDON_01519_gene	SARSHI1M.gff3_genome	E															0
ENBDON_01520_gene	SARSHI1M.gff3_genome	D										MmyB-like transcription regulator ligand binding domain [PF17765.4]; Helix-turn-helix domain [PF12844.10]; Helix-turn-helix domain [PF13560.9]; Helix-turn-helix [PF01381.25]					0
ENBDON_01521_gene	SARSHI1M.gff3_genome	D										Domain of unknown function (DUF1330) [PF07045.14]					0
ENBDON_01522_gene	SARSHI1M.gff3_genome	C	K03649	double-stranded uracil-DNA glycosylase [EC:3.2.2.28]								Uracil DNA glycosylase superfamily [PF03167.22]					0
ENBDON_01523_gene	SARSHI1M.gff3_genome	C	K07448	restriction system protein								Mrr N-terminal domain [PF14338.9]; Restriction endonuclease [PF04471.15]					0
ENBDON_01524_gene	SARSHI1M.gff3_genome	D										Domain of unknown function (DUF1906) [PF08924.14]					0
ENBDON_01525_gene	SARSHI1M.gff3_genome	D										Major Facilitator Superfamily [PF07690.19]; Fungal trichothecene efflux pump (TRI12) [PF06609.16]; Sugar (and other) transporter [PF00083.27]					0
ENBDON_01526_gene	SARSHI1M.gff3_genome	E															0
ENBDON_01527_gene	SARSHI1M.gff3_genome	E															0
ENBDON_01528_gene	SARSHI1M.gff3_genome	C	K13669	alpha-1,2-mannosyltransferase [EC:2.4.1.-]								Glycosyltransferase family 87 [PF09594.13]	GT87	GT87 polyprenol-P-Man: alpha-1,2-mannosyltransferase (EC 2.4.1.-)	2.4.1.-	GT87.hmm	0
ENBDON_01529_gene	SARSHI1M.gff3_genome	C	K01724	4a-hydroxytetrahydrobiopterin dehydratase [EC:4.2.1.96]								Pterin 4 alpha carbinolamine dehydratase [PF01329.22]					0
ENBDON_01530_gene	SARSHI1M.gff3_genome	C	K03574	8-oxo-dGTP diphosphatase [EC:3.6.1.55]								NUDIX domain [PF00293.31]; NUDIX domain [PF14815.9]					0
ENBDON_01531_gene	SARSHI1M.gff3_genome	E															0
ENBDON_01532_gene	SARSHI1M.gff3_genome	C	K06207	GTP-binding protein								Elongation factor Tu GTP binding domain [PF00009.30]; Elongation factor G C-terminus [PF00679.27]; Elongation factor Tu domain 2 [PF03144.28]					0
ENBDON_01533_gene	SARSHI1M.gff3_genome	D										Bacterial extracellular solute-binding proteins, family 5 Middle [PF00496.25]					0
ENBDON_01534_gene	SARSHI1M.gff3_genome	C	K15525	N-acetyl-1-D-myo-inositol-2-amino-2-deoxy-alpha-D-glucopyranoside deacetylase [EC:3.5.1.103]								GlcNAc-PI de-N-acetylase [PF02585.20]	CE14	CE14 N-acetyl-1-D-myo-inosityl-2-amino-2-deoxy-alpha-D-glucopyranoside deacetylase (EC 3.5.1.89); diacetylchitobiose deacetylase (EC 3.5.1.-); mycothiol S-conjugate amidase (EC 3.5.1.-)	3.5.1.105,3.5.1.115,3.5.1.89,3.5.1.-	CE14.hmm	0
ENBDON_01535_gene	SARSHI1M.gff3_genome	E															0
ENBDON_01536_gene	SARSHI1M.gff3_genome	E															0
ENBDON_01537_gene	SARSHI1M.gff3_genome	C	K21929	uracil-DNA glycosylase [EC:3.2.2.27]								Uracil DNA glycosylase superfamily [PF03167.22]					0
ENBDON_01538_gene	SARSHI1M.gff3_genome	C	K08981	putative membrane protein								Bacterial PH domain [PF03703.17]					0
ENBDON_01539_gene	SARSHI1M.gff3_genome	C	K09167	uncharacterized protein								Bacterial PH domain [PF03703.17]					0
ENBDON_01540_gene	SARSHI1M.gff3_genome	E															0
ENBDON_01541_gene	SARSHI1M.gff3_genome	C	K11779	FO synthase [EC:2.5.1.147 4.3.1.32]								CofH/MqnC C-terminal region [PF19288.2]; Radical SAM superfamily [PF04055.24]					0
ENBDON_01542_gene	SARSHI1M.gff3_genome	E															0
ENBDON_01543_gene	SARSHI1M.gff3_genome	D										4Fe-4S dicluster domain [PF12838.10]; 4Fe-4S dicluster domain [PF14697.9]; 4Fe-4S dicluster domain [PF13247.9]; 4Fe-4S dicluster domain [PF13187.9]; 4Fe-4S binding domain [PF00037.30]					0
ENBDON_01544_gene	SARSHI1M.gff3_genome	D										Aminotransferase class I and II [PF00155.24]					0
ENBDON_01545_gene	SARSHI1M.gff3_genome	C	K00294	1-pyrroline-5-carboxylate dehydrogenase [EC:1.2.1.88]								Aldehyde dehydrogenase family [PF00171.25]					0
ENBDON_01546_gene	SARSHI1M.gff3_genome	C	K00318	proline dehydrogenase [EC:1.5.5.2]								Proline dehydrogenase [PF01619.21]					0
ENBDON_01547_gene	SARSHI1M.gff3_genome	D			MER1076202	S54	MER1076202 - family S54 unassigned peptidases (Rhodococcus qingshengii) [S54.UPW]#S54#{peptidase unit: 54-210}~source A0A069J8S2~	FALSE	0.444	127	1.437e-31	Rhomboid family [PF01694.25]					0
ENBDON_01548_gene	SARSHI1M.gff3_genome	C	K12429	fatty acid CoA ligase FadD36								AMP-binding enzyme [PF00501.31]; AMP-binding enzyme C-terminal domain [PF13193.9]					0
ENBDON_01549_gene	SARSHI1M.gff3_genome	D										PucR C-terminal helix-turn-helix domain [PF13556.9]					0
ENBDON_01550_gene	SARSHI1M.gff3_genome	D										Bacterial extracellular solute-binding protein [PF13531.9]; von Willebrand factor type A domain [PF13768.9]; von Willebrand factor type A domain [PF00092.31]; von Willebrand factor type A domain [PF13519.9]					0
ENBDON_01551_gene	SARSHI1M.gff3_genome	C	K16237	aromatic amino acid permease								Amino acid permease [PF00324.24]; Amino acid permease [PF13520.9]					0
ENBDON_01552_gene	SARSHI1M.gff3_genome	C	K00674	2,3,4,5-tetrahydropyridine-2,6-dicarboxylate N-succinyltransferase [EC:2.3.1.117]								Tetrahydrodipicolinate N-succinyltransferase middle [PF14789.9]; Tetrahydrodipicolinate N-succinyltransferase N-terminal [PF14790.9]; Hexapeptide repeat of succinyl-transferase [PF14602.9]					0
ENBDON_01553_gene	SARSHI1M.gff3_genome	C	K01439	succinyl-diaminopimelate desuccinylase [EC:3.5.1.18]	MER0400325	M20A	MER0400325 - acetylornithine deacetylase ArgE (Rhodococcus ruber) [M20.974]#M20A#{peptidase unit: 13-356}~source ZP_22882377~	TRUE	0.951	689	1.913e-223	Peptidase family M20/M25/M40 [PF01546.31]; Peptidase dimerisation domain [PF07687.17]					0
ENBDON_01554_gene	SARSHI1M.gff3_genome	D										Possible lysine decarboxylase [PF03641.17]; SLOG cluster4 family [PF18306.4]					0
ENBDON_01555_gene	SARSHI1M.gff3_genome	C	K22522	cytokinin riboside 5'-monophosphate phosphoribohydrolase [EC:3.2.2.-]								Possible lysine decarboxylase [PF03641.17]; SLOG cluster4 family [PF18306.4]					0
ENBDON_01556_gene	SARSHI1M.gff3_genome	D										AMP-binding enzyme [PF00501.31]; AMP-binding enzyme C-terminal domain [PF13193.9]					0
ENBDON_01557_gene	SARSHI1M.gff3_genome	C	K00796	dihydropteroate synthase [EC:2.5.1.15]								Pterin binding enzyme [PF00809.25]					0
ENBDON_01558_gene	SARSHI1M.gff3_genome	C	K13693	glucosyl-3-phosphoglycerate synthase [EC:2.4.1.266]								Glycosyl transferase family 2 [PF00535.29]; Glycosyltransferase like family 2 [PF13641.9]	GT81	GT81 NDP-Glc: glucosyl-3-phosphoglycerate synthase (EC 2.4.1.266); NDP-Man: mannosyl-3-phosphoglycerate synthase (EC 2.4.1.217);	2.4.1.217,2.4.1.266,2.4.1.270,2.4.1.-	GT81.hmm	0
ENBDON_01559_gene	SARSHI1M.gff3_genome	D										DivIVA protein [PF05103.16]					0
ENBDON_01560_gene	SARSHI1M.gff3_genome	C	K01246	DNA-3-methyladenine glycosylase I [EC:3.2.2.20]								Methyladenine glycosylase [PF03352.16]					0
ENBDON_01561_gene	SARSHI1M.gff3_genome	D										Protein of unknown function (DUF3117) [PF11314.11]					0
ENBDON_01562_gene	SARSHI1M.gff3_genome	C	K00563	23S rRNA (guanine745-N1)-methyltransferase [EC:2.1.1.187]								Methyltransferase domain [PF13649.9]; ubiE/COQ5 methyltransferase family [PF01209.21]; Methyltransferase domain [PF08242.15]; Methyltransferase domain [PF13489.9]; Methyltransferase domain [PF08241.15]					0
ENBDON_01563_gene	SARSHI1M.gff3_genome	C	K16148	alpha-maltose-1-phosphate synthase [EC:2.4.1.342]								Glycosyl transferases group 1 [PF00534.23]; Glycosyl transferases group 1 [PF13692.9]; Glycosyltransferase Family 4 [PF13439.9]; Glycosyl transferase 4-like domain [PF13579.9]; Glycosyl transferases group 1 [PF13524.9]	GT4; GT5	GT4 sucrose synthase (EC 2.4.1.13); sucrose-phosphate synthase (EC 2.4.1.14); alpha-glucosyltransferase (EC 2.4.1.52); lipopolysaccharide N-acetylglucosaminyltransferase (EC 2.4.1.56); phosphatidylinositol alpha-mannosyltransferase (EC 2.4.1.57); GDP-Man: Man1GlcNAc2-PP-dolichol alpha-1,3-mannosyltransferase (EC 2.4.1.132); GDP-Man: Man3GlcNAc2-PP-dolichol/Man4GlcNAc2-PP-dolichol alpha-1,2-mannos…	2.4.1.131,2.4.1.13,2.4.1.14,2.4.1.157,2.4.1.198,2.4.1.208,2.4.1.21,2.4.1.231,2.4.1.241,2.4.1.245,2.4.1.252,2.4.1.257,2.4.1.270,2.4.1.283,2.4.1.285,2.4.1.290,2.4.1.342,2.4.1.57,2.4.1.-,2.4.2.-,2.4.1.132; 2.4.1.11,2.4.1.183,2.4.1.21,2.4.1.-,2.4.1.242	GT5.hmm	0
ENBDON_01564_gene	SARSHI1M.gff3_genome	C	K00975	glucose-1-phosphate adenylyltransferase [EC:2.7.7.27]								Nucleotidyl transferase [PF00483.26]; MobA-like NTP transferase domain [PF12804.10]					0
ENBDON_01565_gene	SARSHI1M.gff3_genome	C	K00588	caffeoyl-CoA O-methyltransferase [EC:2.1.1.104]								O-methyltransferase [PF01596.20]; Methyltransferase domain [PF13578.9]; tRNA methyltransferase complex GCD14 subunit [PF08704.13]; Methyltransferase domain [PF13649.9]; ubiE/COQ5 methyltransferase family [PF01209.21]					0
ENBDON_01566_gene	SARSHI1M.gff3_genome	C	K03088	RNA polymerase sigma-70 factor, ECF subfamily								Sigma-70 region 2 [PF04542.17]; ECF sigma factor [PF07638.14]; Sigma-70, region 4 [PF08281.15]; Sigma-70, region 4 [PF04545.19]					0
ENBDON_01567_gene	SARSHI1M.gff3_genome	E															0
ENBDON_01568_gene	SARSHI1M.gff3_genome	C	K08372	putative serine protease PepD [EC:3.4.21.-]	MER0903514	S01C	MER0903514 - subfamily S1C unassigned peptidases (Rhodococcus ruber) [S01.UPC]#S01C#{peptidase unit: 243-510}~source A0A098BX78~	TRUE	0.909	511	5.333e-159	Trypsin-like peptidase domain [PF13365.9]; PDZ domain [PF13180.9]; Peptidase family M50 [PF02163.25]; PDZ domain [PF17820.4]					0
ENBDON_01569_gene	SARSHI1M.gff3_genome	C	K03117	sec-independent protein translocase protein TatB								mttA/Hcf106 family [PF02416.19]					0
ENBDON_01570_gene	SARSHI1M.gff3_genome	C	K03593	ATP-binding protein involved in chromosome partitioning								NUBPL iron-transfer P-loop NTPase [PF10609.12]; AAA domain [PF13614.9]; Iron-sulfur cluster assembly protein [PF01883.22]; Cellulose biosynthesis protein BcsQ [PF06564.15]; CobQ/CobB/MinD/ParA nucleotide binding domain [PF01656.26]; ATPase MipZ [PF09140.14]; VirC1 protein [PF07015.14]; 4Fe-4S iron sulfur cluster binding proteins, NifH/frxC family [PF00142.21]					0
ENBDON_01571_gene	SARSHI1M.gff3_genome	D										Transglycosylase SLT domain [PF13406.9]	GH23	GH23 lysozyme type G (EC 3.2.1.17); peptidoglycan lyase (EC 4.2.2.n1) also known in the literature as peptidoglycan lytic transglycosylase; chitinase (EC 3.2.1.14)	3.2.1.17,3.2.1.17_or_4.2.2.n1,4.2.2.n1	GH23.hmm	0
ENBDON_01572_gene	SARSHI1M.gff3_genome	E															0
ENBDON_01573_gene	SARSHI1M.gff3_genome	D										Protein of unknown function (DUF1003) [PF06210.14]					0
ENBDON_01574_gene	SARSHI1M.gff3_genome	C	K06213	magnesium transporter								MgtE intracellular N domain [PF03448.20]; CBS domain [PF00571.31]					0
ENBDON_01575_gene	SARSHI1M.gff3_genome	C	K01644	citrate lyase subunit beta / citryl-CoA lyase [EC:4.1.3.34]								HpcH/HpaI aldolase/citrate lyase family [PF03328.17]; C-C_Bond_Lyase of the TIM-Barrel fold [PF15617.9]					0
ENBDON_01576_gene	SARSHI1M.gff3_genome	D										Heat induced stress protein YflT domain [PF11181.11]					0
ENBDON_01577_gene	SARSHI1M.gff3_genome	C	K10236	trehalose/maltose transport system substrate-binding protein								Bacterial extracellular solute-binding protein [PF01547.28]; Bacterial extracellular solute-binding protein [PF13416.9]					0
ENBDON_01578_gene	SARSHI1M.gff3_genome	C	K10237	trehalose/maltose transport system permease protein								Binding-protein-dependent transport system inner membrane component [PF00528.25]					0
ENBDON_01579_gene	SARSHI1M.gff3_genome	C	K10238	trehalose/maltose transport system permease protein								Binding-protein-dependent transport system inner membrane component [PF00528.25]					0
ENBDON_01580_gene	SARSHI1M.gff3_genome	C	K10112	multiple sugar transport system ATP-binding protein [EC:7.5.2.-]								ABC transporter [PF00005.30]; MalK OB fold domain [PF17912.4]					0
ENBDON_01581_gene	SARSHI1M.gff3_genome	E															0
ENBDON_01582_gene	SARSHI1M.gff3_genome	D										Fungal trichothecene efflux pump (TRI12) [PF06609.16]; Major Facilitator Superfamily [PF07690.19]; Uncharacterised MFS-type transporter YbfB [PF06779.17]; MFS_1 like family [PF12832.10]					0
ENBDON_01583_gene	SARSHI1M.gff3_genome	D										Winged helix DNA-binding domain [PF06224.15]					0
ENBDON_01584_gene	SARSHI1M.gff3_genome	D										Protein of unknown function (DUF1360) [PF07098.14]					0
ENBDON_01585_gene	SARSHI1M.gff3_genome	D										DEAD/DEAH box helicase [PF00270.32]; Helicase conserved C-terminal domain [PF00271.34]; RecQ zinc-binding [PF16124.8]; Protein of unknown function (DUF3553) [PF12073.11]					0
ENBDON_01586_gene	SARSHI1M.gff3_genome	E															0
ENBDON_01587_gene	SARSHI1M.gff3_genome	D										Suppressor of fused protein (SUFU) [PF05076.16]					0
ENBDON_01588_gene	SARSHI1M.gff3_genome	E															0
ENBDON_01589_gene	SARSHI1M.gff3_genome	C	K03284	magnesium transporter								CorA-like Mg2+ transporter protein [PF01544.21]					0
ENBDON_01590_gene	SARSHI1M.gff3_genome	C	K07053	3',5'-nucleoside bisphosphate phosphatase [EC:3.1.3.97]								PHP domain [PF02811.22]					0
ENBDON_01591_gene	SARSHI1M.gff3_genome	E															0
ENBDON_01592_gene	SARSHI1M.gff3_genome	C	K00027	malate dehydrogenase (oxaloacetate-decarboxylating) [EC:1.1.1.38]								Malic enzyme, NAD binding domain [PF03949.18]; Malic enzyme, N-terminal domain [PF00390.22]					0
ENBDON_01593_gene	SARSHI1M.gff3_genome	C	K05845	osmoprotectant transport system substrate-binding protein													0
ENBDON_01594_gene	SARSHI1M.gff3_genome	C	K14731	epsilon-lactone hydrolase [EC:3.1.1.83]	MER0226894	S09C	MER0226894 - subfamily S9C non-peptidase homologues (Rhodococcus equi) [S09.UNC]#S09C#{peptidase unit: 42-289}~source YP_004006231~	TRUE	0.708	355	1.192e-108	alpha/beta hydrolase fold [PF07859.16]; Steryl acetyl hydrolase [PF10340.12]; BD-FAE [PF20434.1]					0
ENBDON_01595_gene	SARSHI1M.gff3_genome	D										short chain dehydrogenase [PF00106.28]; Enoyl-(Acyl carrier protein) reductase [PF13561.9]; KR domain [PF08659.13]					0
ENBDON_01596_gene	SARSHI1M.gff3_genome	D										Flavin-binding monooxygenase-like [PF00743.22]; L-lysine 6-monooxygenase/L-ornithine 5-monooxygenase [PF13434.9]; Pyridine nucleotide-disulphide oxidoreductase [PF07992.17]; NAD(P)-binding Rossmann-like domain [PF13450.9]; FAD binding domain [PF00890.27]; FAD binding domain [PF01494.22]; Flavin containing amine oxidoreductase [PF01593.27]					0
ENBDON_01597_gene	SARSHI1M.gff3_genome	D										Bacterial regulatory proteins, tetR family [PF00440.26]					0
ENBDON_01598_gene	SARSHI1M.gff3_genome	C	K01616	multifunctional 2-oxoglutarate metabolism enzyme [EC:2.2.1.5 4.1.1.71 1.2.4.2 2.3.1.61]								Dehydrogenase E1 component [PF00676.23]; 2-oxoglutarate dehydrogenase C-terminal [PF16870.8]; 2-oxoacid dehydrogenases acyltransferase (catalytic domain) [PF00198.26]; Transketolase, pyrimidine binding domain [PF02779.27]; 2-oxoglutarate dehydrogenase N-terminus [PF16078.8]					0
ENBDON_01599_gene	SARSHI1M.gff3_genome	C	K06147	ATP-binding cassette, subfamily B, bacterial								ABC transporter [PF00005.30]; ABC transporter transmembrane region [PF00664.26]					0
ENBDON_01600_gene	SARSHI1M.gff3_genome	E															0
ENBDON_01601_gene	SARSHI1M.gff3_genome	C	K01990	ABC-2 type transport system ATP-binding protein								ABC transporter [PF00005.30]					0
ENBDON_01602_gene	SARSHI1M.gff3_genome	D			MER0226895	S33	MER0226895 - family S33 unassigned peptidases (Rhodococcus equi) [S33.UPW]#S33#{peptidase unit: 1-239}~source YP_004006240~	FALSE	0.599	280	3.485e-83	Serine aminopeptidase, S33 [PF12146.11]; alpha/beta hydrolase fold [PF00561.23]; Alpha/beta hydrolase family [PF12697.10]; Alpha/beta hydrolase of unknown function (DUF1057) [PF06342.15]; TAP-like protein [PF08386.13]; Serine hydrolase [PF06821.16]; X-Pro dipeptidyl-peptidase (S15 family) [PF02129.21]; Phospholipase/Carboxylesterase [PF02230.19]					0
ENBDON_01603_gene	SARSHI1M.gff3_genome	E															0
ENBDON_01604_gene	SARSHI1M.gff3_genome	D										Helix-turn-helix domain [PF12833.10]; Domain of unknown function (DUF6597) [PF20240.1]					0
ENBDON_01605_gene	SARSHI1M.gff3_genome	C	K04750	PhnB protein								Glyoxalase/Bleomycin resistance protein/Dioxygenase superfamily [PF00903.28]; Glyoxalase-like domain [PF18029.4]; Glyoxalase-like domain [PF12681.10]					0
ENBDON_01606_gene	SARSHI1M.gff3_genome	C	K07393	glutathionyl-hydroquinone reductase [EC:1.8.5.7]								Glutathione S-transferase, C-terminal domain [PF13410.9]; Glutathione S-transferase, N-terminal domain [PF13409.9]; Peroxidase [PF00141.26]; Glutathione S-transferase, C-terminal domain [PF00043.28]					0
ENBDON_01607_gene	SARSHI1M.gff3_genome	D										GNAT acetyltransferase [PF12746.10]					0
ENBDON_01608_gene	SARSHI1M.gff3_genome	C	K03446	MFS transporter, DHA2 family, multidrug resistance protein								Fungal trichothecene efflux pump (TRI12) [PF06609.16]; Major Facilitator Superfamily [PF07690.19]; Sugar (and other) transporter [PF00083.27]; MFS_1 like family [PF12832.10]; Transmembrane secretion effector [PF05977.16]					0
ENBDON_01609_gene	SARSHI1M.gff3_genome	D										Enoyl-CoA hydratase/isomerase [PF00378.23]; Enoyl-CoA hydratase/isomerase [PF16113.8]					0
ENBDON_01610_gene	SARSHI1M.gff3_genome	D										AMP-binding enzyme [PF00501.31]					0
ENBDON_01611_gene	SARSHI1M.gff3_genome	C	K01692	enoyl-CoA hydratase [EC:4.2.1.17]	MER1073240	S49C	MER1073240 - subfamily S49C non-peptidase homologues (Acinetobacter bohemicus) [S49.UNC]#S49C#{peptidase unit: 84-212}~source N8Q6E4~	FALSE	0.364	74	2.677e-13	Enoyl-CoA hydratase/isomerase [PF00378.23]; Enoyl-CoA hydratase/isomerase [PF16113.8]					0
ENBDON_01612_gene	SARSHI1M.gff3_genome	C	K21053	adenine deaminase [EC:3.5.4.2]								Adenosine deaminase [PF00962.25]; AMP deaminase [PF19326.2]					0
ENBDON_01613_gene	SARSHI1M.gff3_genome	C	K05888	L-gulono-1,4-lactone dehydrogenase [EC:1.1.2.-]								D-arabinono-1,4-lactone oxidase [PF04030.17]; FAD binding domain [PF01565.26]	AA7	AA7 glucooligosaccharide oxidase (EC 1.1.3.-); chitooligosaccharide oxidase (EC 1.1.3.-); cellooligosaccharide dehydrogenase (EC 1.1.99.-)	1.1.3.-,1.1.99.-	AA7.hmm	0
ENBDON_01614_gene	SARSHI1M.gff3_genome	D										Bacterial regulatory proteins, tetR family [PF00440.26]					0
ENBDON_01615_gene	SARSHI1M.gff3_genome	D										Alanine racemase, N-terminal domain [PF01168.23]					0
ENBDON_01616_gene	SARSHI1M.gff3_genome	D										Uncharacterized protein conserved in bacteria (DUF2252) [PF10009.12]					0
ENBDON_01617_gene	SARSHI1M.gff3_genome	D			MER0174100	S33	MER0174100 - family S33 unassigned peptidases (Rhodococcus opacus) [S33.UPW]#S33#{peptidase unit: 13-213}~source BAH54339~	FALSE	0.643	258	7.066e-77	Serine aminopeptidase, S33 [PF12146.11]; Alpha/beta hydrolase domain [PF20408.1]; Dienelactone hydrolase family [PF01738.21]; Alpha/beta hydrolase family [PF12697.10]; alpha/beta hydrolase fold [PF00561.23]; Prolyl oligopeptidase family [PF00326.24]; Phospholipase/Carboxylesterase [PF02230.19]; Chlorophyllase enzyme [PF12740.10]; Serine hydrolase [PF06821.16]					0
ENBDON_01618_gene	SARSHI1M.gff3_genome	C	K01897	long-chain acyl-CoA synthetase [EC:6.2.1.3]								AMP-binding enzyme [PF00501.31]					0
ENBDON_01619_gene	SARSHI1M.gff3_genome	C	K07100	putative phosphoribosyl transferase								Phosphoribosyl transferase domain [PF00156.30]					0
ENBDON_01620_gene	SARSHI1M.gff3_genome	E															0
ENBDON_01621_gene	SARSHI1M.gff3_genome	C	K06001	tryptophan synthase beta chain [EC:4.2.1.20]								Pyridoxal-phosphate dependent enzyme [PF00291.28]					0
ENBDON_01622_gene	SARSHI1M.gff3_genome	C	K18939	TetR/AcrR family transcriptional regulator, lmrAB and yxaGH operons repressor								Tetracyclin repressor-like, C-terminal domain [PF16925.8]; Bacterial regulatory proteins, tetR family [PF00440.26]					0
ENBDON_01623_gene	SARSHI1M.gff3_genome	D										Male sterility protein [PF07993.15]; NAD dependent epimerase/dehydratase family [PF01370.24]; 3-beta hydroxysteroid dehydrogenase/isomerase family [PF01073.22]; NmrA-like family [PF05368.16]					0
ENBDON_01624_gene	SARSHI1M.gff3_genome	C	K05592	ATP-dependent RNA helicase DeaD [EC:3.6.4.13]								DEAD/DEAH box helicase [PF00270.32]; Helicase conserved C-terminal domain [PF00271.34]; DbpA RNA binding domain [PF03880.18]; Type III restriction enzyme, res subunit [PF04851.18]					0
ENBDON_01625_gene	SARSHI1M.gff3_genome	D										Domain of Unknown Function (DUF1206) [PF06724.14]					0
ENBDON_01626_gene	SARSHI1M.gff3_genome	D										Protein of unknown function (DUF664) [PF04978.15]; DinB superfamily [PF12867.10]					0
ENBDON_01627_gene	SARSHI1M.gff3_genome	D										ABC transporter [PF00005.30]; ABC transporter transmembrane region [PF00664.26]					0
ENBDON_01628_gene	SARSHI1M.gff3_genome	D										Pyridoxamine 5'-phosphate oxidase [PF01243.23]; Pyridoxamine 5'-phosphate oxidase like [PF16242.8]					0
ENBDON_01629_gene	SARSHI1M.gff3_genome	E															0
ENBDON_01630_gene	SARSHI1M.gff3_genome	C	K01151	deoxyribonuclease IV [EC:3.1.21.2]								Xylose isomerase-like TIM barrel [PF01261.27]					0
ENBDON_01631_gene	SARSHI1M.gff3_genome	C	K02003	putative ABC transport system ATP-binding protein								ABC transporter [PF00005.30]					0
ENBDON_01632_gene	SARSHI1M.gff3_genome	C	K02004	putative ABC transport system permease protein								FtsX-like permease family [PF02687.24]					0
ENBDON_01633_gene	SARSHI1M.gff3_genome	D										Alpha/beta hydrolase [PF06259.15]					0
ENBDON_01634_gene	SARSHI1M.gff3_genome	D										Lipoprotein confined to pathogenic Mycobacterium [PF16708.8]					0
ENBDON_01635_gene	SARSHI1M.gff3_genome	E															0
ENBDON_01636_gene	SARSHI1M.gff3_genome	C	K00865	glycerate 2-kinase [EC:2.7.1.165]								Glycerate kinase family [PF02595.18]					0
ENBDON_01637_gene	SARSHI1M.gff3_genome	C	K01640	hydroxymethylglutaryl-CoA lyase [EC:4.1.3.4]								HMGL-like [PF00682.22]					0
ENBDON_01638_gene	SARSHI1M.gff3_genome	C	K07749	formyl-CoA transferase [EC:2.8.3.16]								CoA-transferase family III [PF02515.20]					0
ENBDON_01639_gene	SARSHI1M.gff3_genome	E															0
ENBDON_01640_gene	SARSHI1M.gff3_genome	C	K15773	HTH-type transcriptional regulator / antitoxin HipB								Helix-turn-helix domain [PF12844.10]; Helix-turn-helix domain [PF13560.9]; Helix-turn-helix [PF01381.25]; Helix-turn-helix domain [PF13744.9]					0
ENBDON_01641_gene	SARSHI1M.gff3_genome	C	K07154	serine/threonine-protein kinase HipA [EC:2.7.11.1]								HipA-like C-terminal domain [PF07804.15]; HipA N-terminal domain [PF13657.9]					0
ENBDON_01642_gene	SARSHI1M.gff3_genome	E															0
ENBDON_01643_gene	SARSHI1M.gff3_genome	D										AAA domain [PF13245.9]; Viral (Superfamily 1) RNA helicase [PF01443.21]					0
ENBDON_01644_gene	SARSHI1M.gff3_genome	E															0
ENBDON_01645_gene	SARSHI1M.gff3_genome	E															0
ENBDON_01646_gene	SARSHI1M.gff3_genome	D										LysR substrate binding domain [PF03466.23]; Bacterial regulatory helix-turn-helix protein, lysR family [PF00126.30]					0
ENBDON_01647_gene	SARSHI1M.gff3_genome	C	K04117	cyclohexanecarboxyl-CoA dehydrogenase [EC:1.3.99.-]								Acyl-CoA dehydrogenase, C-terminal domain [PF00441.27]; Acyl-CoA dehydrogenase, middle domain [PF02770.22]; Acyl-CoA dehydrogenase, N-terminal domain [PF02771.19]; Acyl-CoA dehydrogenase, C-terminal domain [PF08028.14]					0
ENBDON_01648_gene	SARSHI1M.gff3_genome	D										CoA-transferase family III [PF02515.20]					0
ENBDON_01649_gene	SARSHI1M.gff3_genome	C	K19802	L-Ala-D/L-Glu epimerase [EC:5.1.1.20]								Enolase C-terminal domain-like [PF13378.9]; Mandelate racemase / muconate lactonizing enzyme, N-terminal domain [PF02746.19]					0
ENBDON_01650_gene	SARSHI1M.gff3_genome	C	K01796	alpha-methylacyl-CoA racemase [EC:5.1.99.4]								CoA-transferase family III [PF02515.20]					0
ENBDON_01651_gene	SARSHI1M.gff3_genome	C	K00141	benzaldehyde dehydrogenase (NAD) [EC:1.2.1.28]								Aldehyde dehydrogenase family [PF00171.25]					0
ENBDON_01652_gene	SARSHI1M.gff3_genome	D			MER0011529	M20X	MER0011529 - family M20 unassigned peptidases (Campylobacter jejuni) [M20.UPW]#M20X#{peptidase unit: 1-415}~source Q9S3L1~	FALSE	0.255	134	1.499e-31	Sugar (and other) transporter [PF00083.27]; Major Facilitator Superfamily [PF07690.19]					0
ENBDON_01653_gene	SARSHI1M.gff3_genome	D										LysR substrate binding domain [PF03466.23]; Bacterial regulatory helix-turn-helix protein, lysR family [PF00126.30]					0
ENBDON_01654_gene	SARSHI1M.gff3_genome	C	K08172	MFS transporter, MHS family, shikimate and dehydroshikimate transport protein	MER0011529	M20X	MER0011529 - family M20 unassigned peptidases (Campylobacter jejuni) [M20.UPW]#M20X#{peptidase unit: 1-415}~source Q9S3L1~	FALSE	0.24	129	7.709e-30	Sugar (and other) transporter [PF00083.27]; Major Facilitator Superfamily [PF07690.19]					0
ENBDON_01655_gene	SARSHI1M.gff3_genome	C	K05712	3-(3-hydroxy-phenyl)propionate hydroxylase [EC:1.14.13.127]								FAD binding domain [PF01494.22]; FAD dependent oxidoreductase [PF01266.27]					0
ENBDON_01656_gene	SARSHI1M.gff3_genome	C	K18851	diacylglycerol O-acyltransferase / trehalose O-mycolyltransferase [EC:2.3.1.20 2.3.1.122]	MER0151582	S09X	MER0151582 - family S9 non-peptidase homologues (Rhodococcus jostii) [S09.UNW]#S09X#{peptidase unit: 89-330}~source ABG93950~	TRUE	0.751	372	4.981e-114	Putative esterase [PF00756.23]	CE1	CE1 acetyl xylan esterase (EC 3.1.1.72); cinnamoyl esterase (EC 3.1.1.-); feruloyl esterase (EC 3.1.1.73); carboxylesterase (EC 3.1.1.1); S-formylglutathione hydrolase (EC 3.1.2.12); diacylglycerol O-acyltransferase (EC 2.3.1.20); trehalose 6-O-mycolyltransferase (EC 2.3.1.122)	2.3.1.122,3.1.1.72,3.2.1.8,3.1.1.-,2.3.1.20	CE1.hmm	0
ENBDON_01657_gene	SARSHI1M.gff3_genome	E															0
ENBDON_01658_gene	SARSHI1M.gff3_genome	C	K00230	menaquinone-dependent protoporphyrinogen oxidase [EC:1.3.5.3]								Flavodoxin domain [PF12724.10]					0
ENBDON_01659_gene	SARSHI1M.gff3_genome	D			MER0041256	S33	MER0041256 - family S33 unassigned peptidases (Nocardia farcinica) [S33.UPW]#S33#{peptidase unit: 1-261}~source YP_121290-1~	FALSE	0.442	199	3.307e-55	Serine aminopeptidase, S33 [PF12146.11]; alpha/beta hydrolase fold [PF00561.23]; TAP-like protein [PF08386.13]					0
ENBDON_01660_gene	SARSHI1M.gff3_genome	C	K00230	menaquinone-dependent protoporphyrinogen oxidase [EC:1.3.5.3]								Flavodoxin domain [PF12724.10]					0
ENBDON_01661_gene	SARSHI1M.gff3_genome	D										NAD(P)H-binding [PF13460.9]; NmrA-like family [PF05368.16]; 3-beta hydroxysteroid dehydrogenase/isomerase family [PF01073.22]					0
ENBDON_01662_gene	SARSHI1M.gff3_genome	C	K01951	GMP synthase (glutamine-hydrolysing) [EC:6.3.5.2]	MER0174902	C26	MER0174902 - family C26 unassigned peptidases (Rhodococcus erythropolis) [C26.UPW]#C26#{peptidase unit: 1-222}~source BAH36181~	FALSE	0.634	241	9.676e-71	Glutamine amidotransferase class-I [PF00117.31]; Peptidase C26 [PF07722.16]					0
ENBDON_01663_gene	SARSHI1M.gff3_genome	D										RibD C-terminal domain [PF01872.20]					0
ENBDON_01664_gene	SARSHI1M.gff3_genome	C	K15736	(S)-2-hydroxyglutarate dehydrogenase [EC:1.1.5.13]								FAD dependent oxidoreductase [PF01266.27]; FAD binding domain [PF01494.22]					0
ENBDON_01665_gene	SARSHI1M.gff3_genome	C	K22270	3-hydroxybenzoate 6-monooxygenase [EC:1.14.13.24]								FAD binding domain [PF01494.22]; FAD dependent oxidoreductase [PF12831.10]; FAD dependent oxidoreductase [PF01266.27]					0
ENBDON_01666_gene	SARSHI1M.gff3_genome	C	K05548	MFS transporter, AAHS family, benzoate transport protein								Sugar (and other) transporter [PF00083.27]; Major Facilitator Superfamily [PF07690.19]; Uncharacterised MFS-type transporter YbfB [PF06779.17]; Fungal trichothecene efflux pump (TRI12) [PF06609.16]					0
ENBDON_01667_gene	SARSHI1M.gff3_genome	D										Bacterial transcriptional regulator [PF01614.21]; IclR helix-turn-helix domain [PF09339.13]					0
ENBDON_01668_gene	SARSHI1M.gff3_genome	C	K00450	gentisate 1,2-dioxygenase [EC:1.13.11.4]													0
ENBDON_01669_gene	SARSHI1M.gff3_genome	C	K16164	acylpyruvate hydrolase [EC:3.7.1.5]								Fumarylacetoacetate (FAA) hydrolase family [PF01557.21]					0
ENBDON_01670_gene	SARSHI1M.gff3_genome	C	K16163	maleylpyruvate isomerase [EC:5.2.1.4]								Mycothiol maleylpyruvate isomerase N-terminal domain [PF11716.11]					0
ENBDON_01671_gene	SARSHI1M.gff3_genome	D										ABC-2 type transporter [PF01061.27]					0
ENBDON_01672_gene	SARSHI1M.gff3_genome	C	K01990	ABC-2 type transport system ATP-binding protein								ABC transporter [PF00005.30]					0
ENBDON_01673_gene	SARSHI1M.gff3_genome	E															0
ENBDON_01674_gene	SARSHI1M.gff3_genome	D			MER0173897	S33	MER0173897 - family S33 non-peptidase homologues (Rhodococcus opacus) [S33.UNW]#S33#{peptidase unit: 28-261}~source BAH50490~	FALSE	0.598	275	6.266e-82	Serine aminopeptidase, S33 [PF12146.11]; alpha/beta hydrolase fold [PF00561.23]; Alpha/beta hydrolase family [PF12697.10]					0
ENBDON_01675_gene	SARSHI1M.gff3_genome	C	K00648	3-oxoacyl-[acyl-carrier-protein] synthase III [EC:2.3.1.180]								3-Oxoacyl-[acyl-carrier-protein (ACP)] synthase III C terminal [PF08541.13]; Chalcone and stilbene synthases, N-terminal domain [PF00195.22]; 3-Oxoacyl-[acyl-carrier-protein (ACP)] synthase III [PF08545.13]					0
ENBDON_01676_gene	SARSHI1M.gff3_genome	C	K00059	3-oxoacyl-[acyl-carrier protein] reductase [EC:1.1.1.100]								Enoyl-(Acyl carrier protein) reductase [PF13561.9]; short chain dehydrogenase [PF00106.28]; KR domain [PF08659.13]; GDP-mannose 4,6 dehydratase [PF16363.8]; NAD dependent epimerase/dehydratase family [PF01370.24]					0
ENBDON_01677_gene	SARSHI1M.gff3_genome	D										Carbamoyl-phosphate synthase L chain, ATP binding domain [PF02786.20]; Carboxyl transferase domain [PF01039.25]; Biotin carboxylase C-terminal domain [PF02785.22]; Biotin carboxylase, N-terminal domain [PF00289.25]; Acetyl-CoA carboxylase, central region [PF08326.15]; ATP-grasp domain [PF02222.25]; Biotin-requiring enzyme [PF00364.25]; ATP-grasp domain [PF02655.17]; D-ala D-ala ligase C-terminus …					0
ENBDON_01678_gene	SARSHI1M.gff3_genome	D										GyrI-like small molecule binding domain [PF06445.18]					0
ENBDON_01679_gene	SARSHI1M.gff3_genome	D			MER0210430	S09X	MER0210430 - family S9 unassigned peptidases (Mesorhizobium loti) [S09.UPW]#S09X#{peptidase unit: 68-294}~source NP_105265~	FALSE	0.291	91	4.455e-17	BAAT / Acyl-CoA thioester hydrolase C terminal [PF08840.14]; Acyl-CoA thioester hydrolase/BAAT N-terminal region [PF04775.17]; Serine aminopeptidase, S33 [PF12146.11]					0
ENBDON_01680_gene	SARSHI1M.gff3_genome	E															0
ENBDON_01681_gene	SARSHI1M.gff3_genome	E															0
ENBDON_01682_gene	SARSHI1M.gff3_genome	C	K18369	alcohol dehydrogenase [EC:1.1.1.-]								Alcohol dehydrogenase GroES-like domain [PF08240.15]; Zinc-binding dehydrogenase [PF00107.29]; Glucose dehydrogenase C-terminus [PF16912.8]; Alcohol dehydrogenase GroES-associated [PF13823.9]					0
ENBDON_01683_gene	SARSHI1M.gff3_genome	E															0
ENBDON_01684_gene	SARSHI1M.gff3_genome	C	K07001	NTE family protein								Patatin-like phospholipase [PF01734.25]					0
ENBDON_01685_gene	SARSHI1M.gff3_genome	D										Haloacid dehalogenase-like hydrolase [PF13419.9]; haloacid dehalogenase-like hydrolase [PF00702.29]; haloacid dehalogenase-like hydrolase [PF12710.10]					0
ENBDON_01686_gene	SARSHI1M.gff3_genome	E															0
ENBDON_01687_gene	SARSHI1M.gff3_genome	E															0
ENBDON_01688_gene	SARSHI1M.gff3_genome	C	K03496	chromosome partitioning protein								AAA domain [PF13614.9]; Cellulose biosynthesis protein BcsQ [PF06564.15]; VirC1 protein [PF07015.14]; Anion-transporting ATPase [PF02374.18]; CobQ/CobB/MinD/ParA nucleotide binding domain [PF01656.26]; ATPase MipZ [PF09140.14]; NUBPL iron-transfer P-loop NTPase [PF10609.12]					0
ENBDON_01689_gene	SARSHI1M.gff3_genome	E															0
ENBDON_01690_gene	SARSHI1M.gff3_genome	E															1
ENBDON_01691_gene	SARSHI1M.gff3_genome	D										Protein of unknown function (DUF429) [PF04250.16]					0
ENBDON_01692_gene	SARSHI1M.gff3_genome	C	K16329	pseudouridylate synthase [EC:4.2.1.70]								Indigoidine synthase A like protein [PF04227.15]					0
ENBDON_01693_gene	SARSHI1M.gff3_genome	C	K07482	transposase, IS30 family													0
ENBDON_01694_gene	SARSHI1M.gff3_genome	C	K06929	uncharacterized protein								CoA binding domain [PF13380.9]					0
ENBDON_01695_gene	SARSHI1M.gff3_genome	E															0
ENBDON_01696_gene	SARSHI1M.gff3_genome	C	K03651	3',5'-cyclic-AMP phosphodiesterase [EC:3.1.4.53]								Calcineurin-like phosphoesterase [PF00149.31]					0
ENBDON_01697_gene	SARSHI1M.gff3_genome	D										Protein of unknown function (DUF1254) [PF06863.15]; Protein of unknown function (DUF1214) [PF06742.14]					0
ENBDON_01698_gene	SARSHI1M.gff3_genome	D										Stealth protein CR2, conserved region 2 [PF11380.11]; Stealth protein CR4, conserved region 4 [PF17103.8]; Stealth protein CR3, conserved region 3 [PF17102.8]; Stealth protein CR1, conserved region 1 [PF17101.8]					0
ENBDON_01699_gene	SARSHI1M.gff3_genome	D										Uncharacterized protein conserved in bacteria N-term (DUF3322) [PF11795.11]; Uncharacterized protein conserved in bacteria C-term(DUF2220) [PF09983.12]					0
ENBDON_01700_gene	SARSHI1M.gff3_genome	D										P-loop containing region of AAA domain [PF13555.9]; SbcC/RAD50-like, Walker B motif [PF13558.9]					0
ENBDON_01701_gene	SARSHI1M.gff3_genome	D										Domain of unknown function (DUF4194) [PF13835.9]					0
ENBDON_01702_gene	SARSHI1M.gff3_genome	D										Protein of unknown function (DUF3375) [PF11855.11]					0
ENBDON_01703_gene	SARSHI1M.gff3_genome	D										Protein of unknown function (DUF3558) [PF12079.11]					0
ENBDON_01704_gene	SARSHI1M.gff3_genome	E															0
ENBDON_01705_gene	SARSHI1M.gff3_genome	C	K01644	citrate lyase subunit beta / citryl-CoA lyase [EC:4.1.3.34]								HpcH/HpaI aldolase/citrate lyase family [PF03328.17]; C-C_Bond_Lyase of the TIM-Barrel fold [PF15617.9]					0
ENBDON_01706_gene	SARSHI1M.gff3_genome	D										CoA-transferase family III [PF02515.20]					0
ENBDON_01707_gene	SARSHI1M.gff3_genome	D										LysR substrate binding domain [PF03466.23]; Bacterial regulatory helix-turn-helix protein, lysR family [PF00126.30]					0
ENBDON_01708_gene	SARSHI1M.gff3_genome	C	K01644	citrate lyase subunit beta / citryl-CoA lyase [EC:4.1.3.34]								HpcH/HpaI aldolase/citrate lyase family [PF03328.17]					0
ENBDON_01709_gene	SARSHI1M.gff3_genome	D										PrpF protein [PF04303.16]					0
ENBDON_01710_gene	SARSHI1M.gff3_genome	D										Dicarboxylate carrier protein MatC N-terminus [PF07158.14]; Citrate transporter [PF03600.19]					0
ENBDON_01711_gene	SARSHI1M.gff3_genome	D										Universal stress protein family [PF00582.29]					0
ENBDON_01712_gene	SARSHI1M.gff3_genome	E															0
ENBDON_01713_gene	SARSHI1M.gff3_genome	D										CBS domain [PF00571.31]; BON domain [PF04972.20]					0
ENBDON_01714_gene	SARSHI1M.gff3_genome	D										Plasmid pRiA4b ORF-3-like protein [PF07929.14]					0
ENBDON_01715_gene	SARSHI1M.gff3_genome	E															0
ENBDON_01716_gene	SARSHI1M.gff3_genome	C	K11163	dehydrogenase/reductase SDR family member 1 [EC:1.1.-.-]								Enoyl-(Acyl carrier protein) reductase [PF13561.9]; short chain dehydrogenase [PF00106.28]					0
ENBDON_01717_gene	SARSHI1M.gff3_genome	C	K02342	DNA polymerase III subunit epsilon [EC:2.7.7.7]								TerD domain [PF02342.21]; Exonuclease [PF00929.27]; BRCA1 C Terminus (BRCT) domain [PF00533.29]					0
ENBDON_01718_gene	SARSHI1M.gff3_genome	D										Protein of unknown function (DUF3761) [PF12587.11]; Protein of unknown function (DUF1524) [PF07510.14]; Protein of unknown function (DUF2510) [PF10708.12]					0
ENBDON_01719_gene	SARSHI1M.gff3_genome	E															0
ENBDON_01720_gene	SARSHI1M.gff3_genome	E															0
ENBDON_01721_gene	SARSHI1M.gff3_genome	E															0
ENBDON_01722_gene	SARSHI1M.gff3_genome	D										Tubulin like [PF13809.9]					0
ENBDON_01723_gene	SARSHI1M.gff3_genome	E															0
ENBDON_01724_gene	SARSHI1M.gff3_genome	E															0
ENBDON_01725_gene	SARSHI1M.gff3_genome	D										GTPase-associated protein 1, N-terminal domain type 2 [PF20013.2]; GTPase-associated protein 1, middle domain [PF20014.2]					0
ENBDON_01726_gene	SARSHI1M.gff3_genome	E															0
ENBDON_01727_gene	SARSHI1M.gff3_genome	D										Double-GTPase 2 [PF19993.2]					1
ENBDON_01728_gene	SARSHI1M.gff3_genome	E															0
ENBDON_01729_gene	SARSHI1M.gff3_genome	C	K09384	uncharacterized protein								Schlafen group 3, DNA/RNA helicase domain [PF09848.12]; AAA domain [PF13604.9]; AAA domain [PF13401.9]					0
ENBDON_01730_gene	SARSHI1M.gff3_genome	D										Protein of unknown function DUF262 [PF03235.17]					0
ENBDON_01731_gene	SARSHI1M.gff3_genome	E															0
ENBDON_01732_gene	SARSHI1M.gff3_genome	E															0
ENBDON_01733_gene	SARSHI1M.gff3_genome	D										Protein of unknown function (DUF2510) [PF10708.12]					0
ENBDON_01734_gene	SARSHI1M.gff3_genome	C	K02529	LacI family transcriptional regulator								Periplasmic binding proteins and sugar binding domain of LacI family [PF00532.24]; Periplasmic binding protein-like domain [PF13377.9]; Periplasmic binding protein domain [PF13407.9]; Bacterial regulatory proteins, lacI family [PF00356.24]					0
ENBDON_01735_gene	SARSHI1M.gff3_genome	C	K09018	pyrimidine oxygenase [EC:1.14.99.46]								Luciferase-like monooxygenase [PF00296.23]					0
ENBDON_01736_gene	SARSHI1M.gff3_genome	D										Carbon-nitrogen hydrolase [PF00795.25]					0
ENBDON_01737_gene	SARSHI1M.gff3_genome	C	K01426	amidase [EC:3.5.1.4]								Amidase [PF01425.24]					0
ENBDON_01738_gene	SARSHI1M.gff3_genome	D										Major Facilitator Superfamily [PF07690.19]; Fungal trichothecene efflux pump (TRI12) [PF06609.16]; Sugar (and other) transporter [PF00083.27]; Transmembrane secretion effector [PF05977.16]; Uncharacterised MFS-type transporter YbfB [PF06779.17]					0
ENBDON_01739_gene	SARSHI1M.gff3_genome	C	K13995	maleamate amidohydrolase [EC:3.5.1.107]								Isochorismatase family [PF00857.23]					0
ENBDON_01740_gene	SARSHI1M.gff3_genome	D										Periplasmic binding protein domain [PF13407.9]					0
ENBDON_01741_gene	SARSHI1M.gff3_genome	D										ABC transporter [PF00005.30]					0
ENBDON_01742_gene	SARSHI1M.gff3_genome	D										Branched-chain amino acid transport system / permease component [PF02653.19]					0
ENBDON_01743_gene	SARSHI1M.gff3_genome	C	K00299	FMN reductase [EC:1.5.1.38]								NADPH-dependent FMN reductase [PF03358.18]					0
ENBDON_01744_gene	SARSHI1M.gff3_genome	D										Flavin reductase like domain [PF01613.21]					0
ENBDON_01745_gene	SARSHI1M.gff3_genome	C	K14652	3,4-dihydroxy 2-butanone 4-phosphate synthase / GTP cyclohydrolase II [EC:4.1.99.12 3.5.4.25]								3,4-dihydroxy-2-butanone 4-phosphate synthase [PF00926.22]; GTP cyclohydrolase II [PF00925.23]					0
ENBDON_01746_gene	SARSHI1M.gff3_genome	D			MER0116842	S33	MER0116842 - family S33 non-peptidase homologues (Mycobacterium abscessus) [S33.UNW]#S33#{peptidase unit: 9-278}~source YP_001705245~	FALSE	0.323	136	1.928e-33	alpha/beta hydrolase fold [PF00561.23]; Serine aminopeptidase, S33 [PF12146.11]; Alpha/beta hydrolase family [PF12697.10]; Alpha/beta hydrolase of unknown function (DUF1057) [PF06342.15]					0
ENBDON_01747_gene	SARSHI1M.gff3_genome	D										Protein of unknown function (DUF3558) [PF12079.11]					0
ENBDON_01748_gene	SARSHI1M.gff3_genome	E															0
ENBDON_01749_gene	SARSHI1M.gff3_genome	C	K01425	glutaminase [EC:3.5.1.2]								Glutaminase [PF04960.18]					0
ENBDON_01750_gene	SARSHI1M.gff3_genome	D										Acetyltransferase (GNAT) domain [PF17668.4]; Sterol carrier protein domain [PF13530.9]					0
ENBDON_01751_gene	SARSHI1M.gff3_genome	C	K03975	membrane-associated protein								SNARE associated Golgi protein [PF09335.14]					0
ENBDON_01752_gene	SARSHI1M.gff3_genome	C	K01286	D-alanyl-D-alanine carboxypeptidase [EC:3.4.16.4]	MER0318417	S12	MER0318417 - family S12 unassigned peptidases (Rhodococcus ruber) [S12.UPW]#S12#{peptidase unit: 58-381}~source ZP_22880804~	TRUE	0.97	664	3.304e-214	Beta-lactamase [PF00144.27]					0
ENBDON_01753_gene	SARSHI1M.gff3_genome	E															0
ENBDON_01754_gene	SARSHI1M.gff3_genome	D										Family of unknown function (DUF5994) [PF19457.2]					0
ENBDON_01755_gene	SARSHI1M.gff3_genome	C	K22468	polyphosphate kinase [EC:2.7.4.34]								Polyphosphate kinase 2 (PPK2) [PF03976.17]					0
ENBDON_01756_gene	SARSHI1M.gff3_genome	E															0
ENBDON_01757_gene	SARSHI1M.gff3_genome	D			MER0096234	S33	MER0096234 - family S33 unassigned peptidases (Rhodococcus jostii) [S33.UPW]#S33#{peptidase unit: 3-224}~source ABG93523~	FALSE	0.649	285	4.978e-86	Alpha/beta hydrolase family [PF12697.10]; alpha/beta hydrolase fold [PF00561.23]; Serine aminopeptidase, S33 [PF12146.11]					0
ENBDON_01758_gene	SARSHI1M.gff3_genome	C	K02355	elongation factor G								Elongation factor G, domain IV [PF03764.21]; Elongation factor Tu GTP binding domain [PF00009.30]; Elongation Factor G, domain III [PF14492.9]; Elongation factor G C-terminus [PF00679.27]; Elongation factor Tu domain 2 [PF03144.28]; Ras family [PF00071.25]					0
ENBDON_01759_gene	SARSHI1M.gff3_genome	C	K18851	diacylglycerol O-acyltransferase / trehalose O-mycolyltransferase [EC:2.3.1.20 2.3.1.122]	MER0226899	S09X	MER0226899 - family S9 non-peptidase homologues (Rhodococcus equi) [S09.UNW]#S09X#{peptidase unit: 119-352}~source YP_004006331~	FALSE	0.662	309	6.738e-92	Putative esterase [PF00756.23]; Prolyl oligopeptidase family [PF00326.24]	CE1	CE1 acetyl xylan esterase (EC 3.1.1.72); cinnamoyl esterase (EC 3.1.1.-); feruloyl esterase (EC 3.1.1.73); carboxylesterase (EC 3.1.1.1); S-formylglutathione hydrolase (EC 3.1.2.12); diacylglycerol O-acyltransferase (EC 2.3.1.20); trehalose 6-O-mycolyltransferase (EC 2.3.1.122)	2.3.1.122,3.1.1.72,3.2.1.8,3.1.1.-,2.3.1.20	CE1.hmm	0
ENBDON_01760_gene	SARSHI1M.gff3_genome	D										Aldehyde dehydrogenase family [PF00171.25]					0
ENBDON_01761_gene	SARSHI1M.gff3_genome	E															0
ENBDON_01762_gene	SARSHI1M.gff3_genome	E															0
ENBDON_01763_gene	SARSHI1M.gff3_genome	E															0
ENBDON_01764_gene	SARSHI1M.gff3_genome	C	K00626	acetyl-CoA C-acetyltransferase [EC:2.3.1.9]								Thiolase, N-terminal domain [PF00108.26]; Thiolase, C-terminal domain [PF02803.21]; Beta-ketoacyl synthase, N-terminal domain [PF00109.29]					0
ENBDON_01765_gene	SARSHI1M.gff3_genome	D										AMP-binding enzyme [PF00501.31]; AMP-binding enzyme C-terminal domain [PF13193.9]					0
ENBDON_01766_gene	SARSHI1M.gff3_genome	E															0
ENBDON_01767_gene	SARSHI1M.gff3_genome	D										MarR family [PF12802.10]; MarR family [PF01047.25]					0
ENBDON_01768_gene	SARSHI1M.gff3_genome	C	K01897	long-chain acyl-CoA synthetase [EC:6.2.1.3]								AMP-binding enzyme [PF00501.31]					0
ENBDON_01769_gene	SARSHI1M.gff3_genome	C	K00705	4-alpha-glucanotransferase [EC:2.4.1.25]								4-alpha-glucanotransferase [PF02446.20]	GH77	GH77 amylomaltase or 4-alpha-glucanotransferase (EC 2.4.1.25)	2.4.1.25	GH77.hmm	0
ENBDON_01770_gene	SARSHI1M.gff3_genome	D										Response regulator receiver domain [PF00072.27]; Bacterial regulatory proteins, luxR family [PF00196.22]					0
ENBDON_01771_gene	SARSHI1M.gff3_genome	D										Histidine kinase-, DNA gyrase B-, and HSP90-like ATPase [PF02518.29]; Histidine kinase [PF07730.16]					0
ENBDON_01772_gene	SARSHI1M.gff3_genome	C	K08884	serine/threonine protein kinase, bacterial [EC:2.7.11.1]								Protein kinase domain [PF00069.28]; Protein tyrosine and serine/threonine kinase [PF07714.20]; Response regulator receiver domain [PF00072.27]; Bacterial regulatory proteins, luxR family [PF00196.22]; Lipopolysaccharide kinase (Kdo/WaaP) family [PF06293.17]; Kinase-like [PF14531.9]; Fungal protein kinase [PF17667.4]					0
ENBDON_01773_gene	SARSHI1M.gff3_genome	E															0
ENBDON_01774_gene	SARSHI1M.gff3_genome	D										Transposase [PF01610.20]					0
ENBDON_01775_gene	SARSHI1M.gff3_genome	D										'Cold-shock' DNA-binding domain [PF00313.25]					0
ENBDON_01776_gene	SARSHI1M.gff3_genome	E															0
ENBDON_01777_gene	SARSHI1M.gff3_genome	C	K14731	epsilon-lactone hydrolase [EC:3.1.1.83]	MER0173864	S09X	MER0173864 - family S9 non-peptidase homologues (Rhodococcus opacus) [S09.UNW]#S09X#{peptidase unit: 94-336}~source BAH49553~	FALSE	0.675	331	5.523e-100	alpha/beta hydrolase fold [PF07859.16]; BD-FAE [PF20434.1]; Steryl acetyl hydrolase [PF10340.12]; Prolyl oligopeptidase family [PF00326.24]					0
ENBDON_01778_gene	SARSHI1M.gff3_genome	C	K00635	diacylglycerol O-acyltransferase / wax synthase [EC:2.3.1.20 2.3.1.75]								Wax ester synthase-like Acyl-CoA acyltransferase domain [PF03007.19]; WS/DGAT C-terminal domain [PF06974.16]					0
ENBDON_01779_gene	SARSHI1M.gff3_genome	C	K02049	NitT/TauT family transport system ATP-binding protein								ABC transporter [PF00005.30]					0
ENBDON_01780_gene	SARSHI1M.gff3_genome	C	K02050	NitT/TauT family transport system permease protein								Binding-protein-dependent transport system inner membrane component [PF00528.25]					0
ENBDON_01781_gene	SARSHI1M.gff3_genome	C	K02051	NitT/TauT family transport system substrate-binding protein								NMT1/THI5 like [PF09084.14]; NMT1-like family [PF13379.9]					0
ENBDON_01782_gene	SARSHI1M.gff3_genome	C	K03707	thiaminase (transcriptional activator TenA) [EC:3.5.99.2]								TENA/THI-4/PQQC family [PF03070.19]					0
ENBDON_01783_gene	SARSHI1M.gff3_genome	C	K03929	para-nitrobenzyl esterase [EC:3.1.1.-]	MER0507559	S09X	MER0507559 - para-nitrobenzyl esterase ({Bacillus subtilis}) (Rhodococcus pyridinivorans) [S09.948]#S09X#{peptidase unit: 74-427}~source YP_008990037~	TRUE	0.822	601	7.762e-190	Carboxylesterase family [PF00135.31]; BD-FAE [PF20434.1]; alpha/beta hydrolase fold [PF07859.16]; Prolyl oligopeptidase family [PF00326.24]; Esterase PHB depolymerase [PF10503.12]					0
ENBDON_01784_gene	SARSHI1M.gff3_genome	D										Bacterial regulatory proteins, gntR family [PF00392.24]					0
ENBDON_01785_gene	SARSHI1M.gff3_genome	E															0
ENBDON_01786_gene	SARSHI1M.gff3_genome	D										Hypervirulence associated proteins TUDOR domain [PF11160.11]					0
ENBDON_01787_gene	SARSHI1M.gff3_genome	C	K10112	multiple sugar transport system ATP-binding protein [EC:7.5.2.-]								ABC transporter [PF00005.30]; MalK OB fold domain [PF17912.4]; TOBE domain [PF08402.13]; CysA C-terminal regulatory domain [PF17850.4]					0
ENBDON_01788_gene	SARSHI1M.gff3_genome	D										Glycosyl hydrolases family 32 N-terminal domain [PF00251.23]; Levansucrase/Invertase [PF02435.19]	GH32	GH32 invertase (EC 3.2.1.26); endo-inulinase (EC 3.2.1.7); beta-2,6-fructan 6-levanbiohydrolase (EC 3.2.1.64); endo-levanase (EC 3.2.1.65); exo-inulinase (EC 3.2.1.80); fructan beta-(2,1)-fructosidase/1-exohydrolase (EC 3.2.1.153); fructan beta-(2,6)-fructosidase/6-exohydrolase (EC 3.2.1.154); sucrose:sucrose 1-fructosyltransferase (EC 2.4.1.99); fructan:fructan 1-fructosyltransferase (EC 2.4.1.1…	2.4.1.100,2.4.1.10,2.4.1.243,2.4.1.99,2.4.1.-,3.2.1.153,3.2.1.154,3.2.1.26,3.2.1.64,3.2.1.65,3.2.1.7,3.2.1.-,4.2.2.16	GH32.hmm	0
ENBDON_01789_gene	SARSHI1M.gff3_genome	C	K02529	LacI family transcriptional regulator								Periplasmic binding proteins and sugar binding domain of LacI family [PF00532.24]; Periplasmic binding protein-like domain [PF13377.9]; Periplasmic binding protein domain [PF13407.9]; Bacterial regulatory proteins, lacI family [PF00356.24]					0
ENBDON_01790_gene	SARSHI1M.gff3_genome	E															0
ENBDON_01791_gene	SARSHI1M.gff3_genome	D										Bacterial extracellular solute-binding protein [PF01547.28]; Bacterial extracellular solute-binding protein [PF13416.9]					0
ENBDON_01792_gene	SARSHI1M.gff3_genome	C	K10118	raffinose/stachyose/melibiose transport system permease protein								Binding-protein-dependent transport system inner membrane component [PF00528.25]					0
ENBDON_01793_gene	SARSHI1M.gff3_genome	D										Binding-protein-dependent transport system inner membrane component [PF00528.25]					0
ENBDON_01794_gene	SARSHI1M.gff3_genome	C	K01187	alpha-glucosidase [EC:3.2.1.20]								Alpha amylase, catalytic domain [PF00128.27]; Domain of unknown function (DUF3459) [PF11941.11]	GH13; GH13_14; GH13_16; GH13_17; GH13_18; GH13_20; GH13_21; GH13_23; GH13_29; GH13_2; GH13_30; GH13_31; GH13_35; GH13_36; GH13_39; GH13_40; GH13_4	GH13 alpha-amylase (EC 3.2.1.1); pullulanase (EC 3.2.1.41); cyclomaltodextrin glucanotransferase (EC 2.4.1.19); cyclomaltodextrinase (EC 3.2.1.54); trehalose-6-phosphate hydrolase (EC 3.2.1.93); oligo-alpha-glucosidase (EC 3.2.1.10); maltogenic amylase (EC 3.2.1.133); neopullulanase (EC 3.2.1.135); alpha-glucosidase (EC 3.2.1.20); maltotetraose-forming alpha-amylase (EC 3.2.1.60); isoamylase (EC …	2.4.1.25,2.4.1.-,3.2.1.1,3.2.1.133,3.2.1.135,3.2.1.20,3.2.1.2,3.2.1.41,3.2.1.54; 3.2.1.1,3.2.1.20,3.2.1.41,3.2.1.68; 5.4.99.16; 3.2.1.20,3.2.1.48; 2.4.1.329,2.4.1.352,2.4.1.359,2.4.1.7,2.4.1.-; 2.4.1.19,2.4.1.-,3.2.1.116,3.2.1.133,3.2.1.1; 3.2.1.1,3.2.1.133,3.2.1.135,3.2.1.41,3.2.1.54,3.2.1.-; 3.2.1.20; 2.4.1.-,3.2.1.10,3.2.1.20,3.2.1.28; 3.2.1.20,3.2.1.93; 3.2.1.20; 3.2.1.10,3.2.1.1,3.2.1.20,3.2…	GH13_30.hmm	0
ENBDON_01795_gene	SARSHI1M.gff3_genome	D										Ceramidase [PF05875.15]					0
ENBDON_01796_gene	SARSHI1M.gff3_genome	E															0
ENBDON_01797_gene	SARSHI1M.gff3_genome	C	K05515	penicillin-binding protein 2 [EC:3.4.16.4]								Cell cycle protein [PF01098.22]; Penicillin binding protein transpeptidase domain [PF00905.25]; Penicillin-binding Protein dimerisation domain [PF03717.18]; Beta-lactamase enzyme family [PF13354.9]					0
ENBDON_01798_gene	SARSHI1M.gff3_genome	C	K03569	rod shape-determining protein MreB and related proteins								MreB/Mbl protein [PF06723.16]; Hsp70 protein [PF00012.23]; Actin [PF00022.22]					0
ENBDON_01799_gene	SARSHI1M.gff3_genome	C	K06975	uncharacterized protein								GCN5-related N-acetyl-transferase [PF14542.9]					0
ENBDON_01800_gene	SARSHI1M.gff3_genome	E															0
ENBDON_01801_gene	SARSHI1M.gff3_genome	E															0
ENBDON_01802_gene	SARSHI1M.gff3_genome	C	K05995	dipeptidase E [EC:3.4.13.21]	MER1071789	S51	MER1071789 - family S51 non-peptidase homologues (Rhodococcus ruber) [S51.UNW]#S51#{peptidase unit: 55-176}~source M2ZGC2~	FALSE	1	260	7.828e-78	Peptidase family S51 [PF03575.20]					0
ENBDON_01803_gene	SARSHI1M.gff3_genome	D										Mycothiol maleylpyruvate isomerase N-terminal domain [PF11716.11]					0
ENBDON_01804_gene	SARSHI1M.gff3_genome	C	K02503	histidine triad (HIT) family protein								HIT domain [PF01230.26]; Scavenger mRNA decapping enzyme C-term binding [PF11969.11]					0
ENBDON_01805_gene	SARSHI1M.gff3_genome	C	K12410	NAD-dependent deacetylase [EC:2.3.1.286]								Sir2 family [PF02146.20]					0
ENBDON_01806_gene	SARSHI1M.gff3_genome	E															0
ENBDON_01807_gene	SARSHI1M.gff3_genome	D										Protein of unknown function, DUF488 [PF04343.16]					0
ENBDON_01808_gene	SARSHI1M.gff3_genome	C	K00324	H+-translocating NAD(P) transhydrogenase subunit alpha [EC:1.6.1.2 7.1.1.1]								Alanine dehydrogenase/PNT, C-terminal domain [PF01262.24]; Alanine dehydrogenase/PNT, N-terminal domain [PF05222.18]					0
ENBDON_01809_gene	SARSHI1M.gff3_genome	D										4TM region of pyridine nucleotide transhydrogenase, mitoch [PF12769.10]					0
ENBDON_01810_gene	SARSHI1M.gff3_genome	C	K00325	H+-translocating NAD(P) transhydrogenase subunit beta [EC:1.6.1.2 7.1.1.1]								NAD(P) transhydrogenase beta subunit [PF02233.19]					0
ENBDON_01811_gene	SARSHI1M.gff3_genome	C	K19784	chromate reductase, NAD(P)H dehydrogenase (quinone)								NADPH-dependent FMN reductase [PF03358.18]					0
ENBDON_01812_gene	SARSHI1M.gff3_genome	E															0
ENBDON_01813_gene	SARSHI1M.gff3_genome	C	K09699	2-oxoisovalerate dehydrogenase E2 component (dihydrolipoyl transacylase) [EC:2.3.1.168]								2-oxoacid dehydrogenases acyltransferase (catalytic domain) [PF00198.26]; Biotin-requiring enzyme [PF00364.25]; e3 binding domain [PF02817.20]					0
ENBDON_01814_gene	SARSHI1M.gff3_genome	C	K00167	2-oxoisovalerate dehydrogenase E1 component beta subunit [EC:1.2.4.4]								Transketolase, pyrimidine binding domain [PF02779.27]; Transketolase, C-terminal domain [PF02780.23]					0
ENBDON_01815_gene	SARSHI1M.gff3_genome	C	K00166	2-oxoisovalerate dehydrogenase E1 component alpha subunit [EC:1.2.4.4]								Dehydrogenase E1 component [PF00676.23]					0
ENBDON_01816_gene	SARSHI1M.gff3_genome	D										Lrp/AsnC ligand binding domain [PF01037.24]; Winged helix-turn-helix DNA-binding [PF13412.9]					0
ENBDON_01817_gene	SARSHI1M.gff3_genome	C	K00632	acetyl-CoA acyltransferase [EC:2.3.1.16]								Thiolase, N-terminal domain [PF00108.26]; Thiolase, C-terminal domain [PF02803.21]					0
ENBDON_01818_gene	SARSHI1M.gff3_genome	C	K07107	acyl-CoA thioester hydrolase [EC:3.1.2.-]								Thioesterase-like superfamily [PF13279.9]; Thioesterase superfamily [PF03061.25]					0
ENBDON_01819_gene	SARSHI1M.gff3_genome	C	K05782	benzoate membrane transport protein								Benzoate membrane transport protein [PF03594.16]					0
ENBDON_01820_gene	SARSHI1M.gff3_genome	C	K01011	thiosulfate/3-mercaptopyruvate sulfurtransferase [EC:2.8.1.1 2.8.1.2]								Rhodanese-like domain [PF00581.23]					0
ENBDON_01821_gene	SARSHI1M.gff3_genome	D										Shikimate dehydrogenase substrate binding domain [PF08501.14]; Shikimate / quinate 5-dehydrogenase [PF01488.23]					0
ENBDON_01822_gene	SARSHI1M.gff3_genome	D										Protein of unknown function (DUF1524) [PF07510.14]; HNH endonuclease [PF13395.9]					0
ENBDON_01823_gene	SARSHI1M.gff3_genome	E															0
ENBDON_01824_gene	SARSHI1M.gff3_genome	D										SNF2-related domain [PF00176.26]; SNF2 Helicase protein [PF12419.11]; Helicase conserved C-terminal domain [PF00271.34]					0
ENBDON_01825_gene	SARSHI1M.gff3_genome	E															0
ENBDON_01826_gene	SARSHI1M.gff3_genome	C	K00140	malonate-semialdehyde dehydrogenase (acetylating) / methylmalonate-semialdehyde dehydrogenase [EC:1.2.1.18 1.2.1.27]								Aldehyde dehydrogenase family [PF00171.25]					0
ENBDON_01827_gene	SARSHI1M.gff3_genome	C	K11538	isobutyryl-CoA dehydrogenase [EC:1.3.99.-]								Acyl-CoA dehydrogenase, C-terminal domain [PF00441.27]; Acyl-CoA dehydrogenase, middle domain [PF02770.22]; Acyl-CoA dehydrogenase, N-terminal domain [PF02771.19]; Acyl-CoA dehydrogenase, C-terminal domain [PF08028.14]					0
ENBDON_01828_gene	SARSHI1M.gff3_genome	C	K01692	enoyl-CoA hydratase [EC:4.2.1.17]								Enoyl-CoA hydratase/isomerase [PF16113.8]; Enoyl-CoA hydratase/isomerase [PF00378.23]					0
ENBDON_01829_gene	SARSHI1M.gff3_genome	C	K00020	3-hydroxyisobutyrate dehydrogenase [EC:1.1.1.31]								NAD binding domain of 6-phosphogluconate dehydrogenase [PF03446.18]; NAD-binding of NADP-dependent 3-hydroxyisobutyrate dehydrogenase [PF14833.9]; UDP-glucose/GDP-mannose dehydrogenase family, NAD binding domain [PF03721.17]					0
ENBDON_01830_gene	SARSHI1M.gff3_genome	C	K01692	enoyl-CoA hydratase [EC:4.2.1.17]	MER1073240	S49C	MER1073240 - subfamily S49C non-peptidase homologues (Acinetobacter bohemicus) [S49.UNC]#S49C#{peptidase unit: 84-212}~source N8Q6E4~	FALSE	0.622	160	3.768e-42	Enoyl-CoA hydratase/isomerase [PF00378.23]; Enoyl-CoA hydratase/isomerase [PF16113.8]					0
ENBDON_01831_gene	SARSHI1M.gff3_genome	C	K23775	MarR family transcriptional regulator, organic hydroperoxide resistance regulator								Winged helix DNA-binding domain [PF13463.9]; MarR family [PF01047.25]; MarR family [PF12802.10]					0
ENBDON_01832_gene	SARSHI1M.gff3_genome	C	K25307	low molecular weight protein-tyrosine phosphatase [EC:3.1.3.48]								Low molecular weight phosphotyrosine protein phosphatase [PF01451.24]					0
ENBDON_01833_gene	SARSHI1M.gff3_genome	C	K22905	omega-hydroxy-beta-dihydromenaquinone-9 sulfotransferase [EC:2.8.2.40]								Sulfotransferase family [PF13469.9]					0
ENBDON_01834_gene	SARSHI1M.gff3_genome	D										Enoyl-(Acyl carrier protein) reductase [PF13561.9]; short chain dehydrogenase [PF00106.28]; KR domain [PF08659.13]					0
ENBDON_01835_gene	SARSHI1M.gff3_genome	E															0
ENBDON_01836_gene	SARSHI1M.gff3_genome	D										IclR helix-turn-helix domain [PF09339.13]					0
ENBDON_01837_gene	SARSHI1M.gff3_genome	C	K00957	sulfate adenylyltransferase subunit 2 [EC:2.7.7.4]								Phosphoadenosine phosphosulfate reductase family [PF01507.22]					0
ENBDON_01838_gene	SARSHI1M.gff3_genome	C	K00955	bifunctional enzyme CysN/CysC [EC:2.7.7.4 2.7.1.25]								Adenylylsulphate kinase [PF01583.23]; Elongation factor Tu GTP binding domain [PF00009.30]; Myo-inositol-1-phosphate synthase [PF07994.15]; AAA domain [PF13671.9]; Chloramphenicol phosphotransferase-like protein [PF07931.15]					0
ENBDON_01839_gene	SARSHI1M.gff3_genome	C	K01082	3'(2'), 5'-bisphosphate nucleotidase [EC:3.1.3.7]								Inositol monophosphatase family [PF00459.28]					0
ENBDON_01840_gene	SARSHI1M.gff3_genome	D										Metallo-beta-lactamase superfamily [PF00753.30]; Metallo-beta-lactamase superfamily domain [PF16661.8]					0
ENBDON_01841_gene	SARSHI1M.gff3_genome	C	K10533	limonene-1,2-epoxide hydrolase [EC:3.3.2.8]								Limonene-1,2-epoxide hydrolase catalytic domain [PF07858.15]; SnoaL-like domain [PF12680.10]; SnoaL-like polyketide cyclase [PF07366.15]					0
ENBDON_01842_gene	SARSHI1M.gff3_genome	D										Uncharacterised MFS-type transporter YbfB [PF06779.17]; Major Facilitator Superfamily [PF07690.19]; Transmembrane secretion effector [PF05977.16]; Sugar (and other) transporter [PF00083.27]					0
ENBDON_01844_gene	SARSHI1M.gff3_genome	C	K01621	xylulose-5-phosphate/fructose-6-phosphate phosphoketolase [EC:4.1.2.9 4.1.2.22]								XFP N-terminal domain [PF09364.13]; XFP C-terminal domain [PF09363.13]; D-xylulose 5-phosphate/D-fructose 6-phosphate phosphoketolase [PF03894.18]					0
ENBDON_01845_gene	SARSHI1M.gff3_genome	C	K08995	putative membrane protein								Domain of unknown function (DUF305) [PF03713.16]					0
ENBDON_01846_gene	SARSHI1M.gff3_genome	D										Protein of unknown function (DUF3105) [PF11303.11]					0
ENBDON_01847_gene	SARSHI1M.gff3_genome	C	K01887	arginyl-tRNA synthetase [EC:6.1.1.19]								tRNA synthetases class I (R) [PF00750.22]; DALR anticodon binding domain [PF05746.18]; Arginyl tRNA synthetase N terminal domain [PF03485.19]; tRNA synthetases class I (I, L, M and V) [PF00133.25]					0
ENBDON_01848_gene	SARSHI1M.gff3_genome	C	K01586	diaminopimelate decarboxylase [EC:4.1.1.20]								Pyridoxal-dependent decarboxylase, pyridoxal binding domain [PF02784.19]; Pyridoxal-dependent decarboxylase, C-terminal sheet domain [PF00278.25]					0
ENBDON_01849_gene	SARSHI1M.gff3_genome	C	K00003	homoserine dehydrogenase [EC:1.1.1.3]								Homoserine dehydrogenase [PF00742.22]; Homoserine dehydrogenase, NAD binding domain [PF03447.19]; ACT domain [PF01842.28]					0
ENBDON_01850_gene	SARSHI1M.gff3_genome	C	K01733	threonine synthase [EC:4.2.3.1]								Pyridoxal-phosphate dependent enzyme [PF00291.28]					0
ENBDON_01851_gene	SARSHI1M.gff3_genome	C	K00872	homoserine kinase [EC:2.7.1.39]								GHMP kinases N terminal domain [PF00288.29]					0
ENBDON_01852_gene	SARSHI1M.gff3_genome	C	K03628	transcription termination factor Rho								ATP synthase alpha/beta family, nucleotide-binding domain [PF00006.28]; Rho termination factor, RNA-binding domain [PF07497.15]; Rho termination factor, N-terminal domain [PF07498.15]; Sporulation stage III, protein AA [PF19568.2]					0
ENBDON_01853_gene	SARSHI1M.gff3_genome	C	K02909	large subunit ribosomal protein L31								Ribosomal protein L31 [PF01197.21]					1
ENBDON_01854_gene	SARSHI1M.gff3_genome	C	K02835	peptide chain release factor 1								PCRF domain [PF03462.21]; RF-1 domain [PF00472.23]					0
ENBDON_01855_gene	SARSHI1M.gff3_genome	E															0
ENBDON_01856_gene	SARSHI1M.gff3_genome	C	K02493	release factor glutamine methyltransferase [EC:2.1.1.297]								Methyltransferase small domain [PF05175.17]; PrmC N-terminal domain [PF17827.4]; Putative RNA methylase family UPF0020 [PF01170.21]; N-6 DNA Methylase [PF02384.19]; Conserved hypothetical protein 95 [PF03602.18]; Methyltransferase domain [PF13649.9]; tRNA (Uracil-5-)-methyltransferase [PF05958.14]; Ribosomal protein L11 methyltransferase (PrmA) [PF06325.16]					0
ENBDON_01857_gene	SARSHI1M.gff3_genome	C	K07566	L-threonylcarbamoyladenylate synthase [EC:2.7.7.87]								Telomere recombination [PF01300.21]					0
ENBDON_01858_gene	SARSHI1M.gff3_genome	C	K02851	UDP-GlcNAc:undecaprenyl-phosphate/decaprenyl-phosphate GlcNAc-1-phosphate transferase [EC:2.7.8.33 2.7.8.35]								Glycosyl transferase family 4 [PF00953.24]					0
ENBDON_01859_gene	SARSHI1M.gff3_genome	E															0
ENBDON_01860_gene	SARSHI1M.gff3_genome	C	K02108	F-type H+-transporting ATPase subunit a								ATP synthase A chain [PF00119.23]					0
ENBDON_01861_gene	SARSHI1M.gff3_genome	C	K02110	F-type H+-transporting ATPase subunit c								ATP synthase subunit C [PF00137.24]					0
ENBDON_01862_gene	SARSHI1M.gff3_genome	C	K02109	F-type H+-transporting ATPase subunit b								ATP synthase B/B' CF(0) [PF00430.21]					0
ENBDON_01863_gene	SARSHI1M.gff3_genome	C	K02113	F-type H+-transporting ATPase subunit delta								ATP synthase delta (OSCP) subunit [PF00213.21]					0
ENBDON_01864_gene	SARSHI1M.gff3_genome	C	K02111	F-type H+/Na+-transporting ATPase subunit alpha [EC:7.1.2.2 7.2.2.1]								ATP synthase alpha/beta family, nucleotide-binding domain [PF00006.28]; ATP synthase alpha/beta chain, C terminal domain [PF00306.30]; ATP synthase alpha/beta family, beta-barrel domain [PF02874.26]; Photosystem I psaA/psaB protein [PF00223.22]					0
ENBDON_01865_gene	SARSHI1M.gff3_genome	C	K02115	F-type H+-transporting ATPase subunit gamma								ATP synthase [PF00231.22]					0
ENBDON_01866_gene	SARSHI1M.gff3_genome	C	K02112	F-type H+/Na+-transporting ATPase subunit beta [EC:7.1.2.2 7.2.2.1]								ATP synthase alpha/beta family, nucleotide-binding domain [PF00006.28]; ATP synthase alpha/beta family, beta-barrel domain [PF02874.26]; T3SS EscN ATPase C-terminal domain [PF18269.4]					0
ENBDON_01867_gene	SARSHI1M.gff3_genome	C	K02114	F-type H+-transporting ATPase subunit epsilon								ATP synthase, Delta/Epsilon chain, beta-sandwich domain [PF02823.19]					0
ENBDON_01868_gene	SARSHI1M.gff3_genome	D										Protein of unknown function (DUF2550) [PF10739.12]					0
ENBDON_01869_gene	SARSHI1M.gff3_genome	C	K00798	cob(I)alamin adenosyltransferase [EC:2.5.1.17]								Cobalamin adenosyltransferase [PF01923.21]					0
ENBDON_01870_gene	SARSHI1M.gff3_genome	C	K00790	UDP-N-acetylglucosamine 1-carboxyvinyltransferase [EC:2.5.1.7]								EPSP synthase (3-phosphoshikimate 1-carboxyvinyltransferase) [PF00275.23]					0
ENBDON_01874_gene	SARSHI1M.gff3_genome	C	K01768	adenylate cyclase [EC:4.6.1.1]								Adenylate and Guanylate cyclase catalytic domain [PF00211.23]; HAMP domain [PF00672.28]					0
ENBDON_01875_gene	SARSHI1M.gff3_genome	C	K07503	endonuclease [EC:3.1.-.-]								Endonuclease NucS [PF01939.19]					0
ENBDON_01876_gene	SARSHI1M.gff3_genome	E															0
ENBDON_01877_gene	SARSHI1M.gff3_genome	C	K05606	methylmalonyl-CoA/ethylmalonyl-CoA epimerase [EC:5.1.99.1]								Glyoxalase/Bleomycin resistance protein/Dioxygenase superfamily [PF13669.9]; Glyoxalase/Bleomycin resistance protein/Dioxygenase superfamily [PF00903.28]; Glyoxalase-like domain [PF13468.9]					0
ENBDON_01878_gene	SARSHI1M.gff3_genome	C	K00626	acetyl-CoA C-acetyltransferase [EC:2.3.1.9]								Thiolase, N-terminal domain [PF00108.26]; Thiolase, C-terminal domain [PF02803.21]					0
ENBDON_01879_gene	SARSHI1M.gff3_genome	D										Domain of unknown function (DUF3817) [PF12823.10]					0
ENBDON_01880_gene	SARSHI1M.gff3_genome	C	K05838	putative thioredoxin								Thioredoxin [PF00085.23]; Tetratricopeptide repeat [PF14561.9]; Redoxin [PF08534.13]; Thioredoxin-like [PF13899.9]; Thioredoxin-like [PF13905.9]; Thioredoxin domain [PF13192.9]; Thioredoxin [PF14595.9]					0
ENBDON_01881_gene	SARSHI1M.gff3_genome	C	K07054	uncharacterized protein								Putative neutral zinc metallopeptidase [PF04228.16]					0
ENBDON_01882_gene	SARSHI1M.gff3_genome	C	K00700	1,4-alpha-glucan branching enzyme [EC:2.4.1.18]								Alpha amylase, catalytic domain [PF00128.27]; Alpha amylase, C-terminal all-beta domain [PF02806.21]; Carbohydrate-binding module 48 (Isoamylase N-terminal domain) [PF02922.21]; Melibiase [PF02065.21]; Glycogen recognition site of AMP-activated protein kinase [PF16561.8]	CBM48; GH13; GH13_10; GH13_11; GH13_3; GH13_8; GH13_9	CBM48 Modules of approx. 100 residues with glycogen-binding function, appended to GH13 modules. Also found in the beta subunit (glycogen-binding) of AMP-activated protein kinases (AMPK); GH13 alpha-amylase (EC 3.2.1.1); pullulanase (EC 3.2.1.41); cyclomaltodextrin glucanotransferase (EC 2.4.1.19); cyclomaltodextrinase (EC 3.2.1.54); trehalose-6-phosphate hydrolase (EC 3.2.1.93); oligo-alpha-gluco…	; 2.4.1.25,2.4.1.-,3.2.1.1,3.2.1.133,3.2.1.135,3.2.1.20,3.2.1.2,3.2.1.41,3.2.1.54; 3.2.1.1,3.2.1.141; 2.4.1.25,3.2.1.20,3.2.1.68; 2.4.99.16; 2.4.1.18,3.2.1.1; 2.4.1.18	GH13_9.hmm	0
ENBDON_01883_gene	SARSHI1M.gff3_genome	C	K16147	starch synthase (maltosyl-transferring) [EC:2.4.99.16]								Alpha-1,4-glucan:maltose-1-phosphate maltosyltransferase, domain N/S [PF11896.11]; Alpha amylase, catalytic domain [PF00128.27]	GH13; GH13_3; GH13_9	GH13 alpha-amylase (EC 3.2.1.1); pullulanase (EC 3.2.1.41); cyclomaltodextrin glucanotransferase (EC 2.4.1.19); cyclomaltodextrinase (EC 3.2.1.54); trehalose-6-phosphate hydrolase (EC 3.2.1.93); oligo-alpha-glucosidase (EC 3.2.1.10); maltogenic amylase (EC 3.2.1.133); neopullulanase (EC 3.2.1.135); alpha-glucosidase (EC 3.2.1.20); maltotetraose-forming alpha-amylase (EC 3.2.1.60); isoamylase (EC …	2.4.1.25,2.4.1.-,3.2.1.1,3.2.1.133,3.2.1.135,3.2.1.20,3.2.1.2,3.2.1.41,3.2.1.54; 2.4.99.16; 2.4.1.18	GH13_3.hmm	0
ENBDON_01884_gene	SARSHI1M.gff3_genome	C	K00688	glycogen phosphorylase [EC:2.4.1.1]								Carbohydrate phosphorylase [PF00343.23]; Protein of unknown function (DUF3417) [PF11897.11]	GT35	GT35 glycogen or starch phosphorylase (EC 2.4.1.1).	2.4.1.1	GT35.hmm	0
ENBDON_01885_gene	SARSHI1M.gff3_genome	C	K04757	serine/threonine-protein kinase RsbW [EC:2.7.11.1]								Histidine kinase-like ATPase domain [PF13581.9]					0
ENBDON_01886_gene	SARSHI1M.gff3_genome	E															0
ENBDON_01887_gene	SARSHI1M.gff3_genome	D										ANTAR domain [PF03861.17]; GAF domain [PF13185.9]; GAF domain [PF01590.29]					0
ENBDON_01888_gene	SARSHI1M.gff3_genome	C	K03704	cold shock protein								'Cold-shock' DNA-binding domain [PF00313.25]					0
ENBDON_01889_gene	SARSHI1M.gff3_genome	C	K03722	ATP-dependent DNA helicase DinG [EC:5.6.2.3]								Helicase C-terminal domain [PF13307.9]; DEAD_2 [PF06733.18]					0
ENBDON_01890_gene	SARSHI1M.gff3_genome	C	K08281	nicotinamidase/pyrazinamidase [EC:3.5.1.19 3.5.1.-]								Isochorismatase family [PF00857.23]					0
ENBDON_01891_gene	SARSHI1M.gff3_genome	C	K00763	nicotinate phosphoribosyltransferase [EC:6.3.4.21]								Nicotinate phosphoribosyltransferase (NAPRTase) family [PF04095.19]; Nicotinate phosphoribosyltransferase (NAPRTase) N-terminal domain [PF17767.4]					0
ENBDON_01892_gene	SARSHI1M.gff3_genome	C	K06891	ATP-dependent Clp protease adaptor protein ClpS								ATP-dependent Clp protease adaptor protein ClpS [PF02617.20]					0
ENBDON_01893_gene	SARSHI1M.gff3_genome	D										Domain of unknown function (DUF2017) [PF09438.13]					0
ENBDON_01894_gene	SARSHI1M.gff3_genome	D			MER0505890	P01	MER0505890 - pantetheinyl hydrolase ThnT precursor (Mycobacterium neoaurum) [P01.101]#P01#{peptidase unit: 7-286}~source YP_008908437~	FALSE	0.563	314	1.767e-93	Peptidase family S58 [PF03576.17]					0
ENBDON_01895_gene	SARSHI1M.gff3_genome	E															0
ENBDON_01896_gene	SARSHI1M.gff3_genome	D			MER1082682	S54	MER1082682 - family S54 unassigned peptidases (Rhodococcus ruber) [S54.UPW]#S54#{peptidase unit: 48-199}~source A0A098BIE3~	FALSE	0.962	310	4.622e-95	Rhomboid family [PF01694.25]					0
ENBDON_01897_gene	SARSHI1M.gff3_genome	C	K00784	ribonuclease Z [EC:3.1.26.11]								Beta-lactamase superfamily domain [PF12706.10]					0
ENBDON_01898_gene	SARSHI1M.gff3_genome	C	K00989	ribonuclease PH [EC:2.7.7.56]								3' exoribonuclease family, domain 1 [PF01138.24]					0
ENBDON_01899_gene	SARSHI1M.gff3_genome	C	K01519	XTP/dITP diphosphohydrolase [EC:3.6.1.66]								Ham1 family [PF01725.19]					0
ENBDON_01900_gene	SARSHI1M.gff3_genome	D										Domain of unknown function (DUF3817) [PF12823.10]					0
ENBDON_01901_gene	SARSHI1M.gff3_genome	E															0
ENBDON_01903_gene	SARSHI1M.gff3_genome	E															1
ENBDON_01904_gene	SARSHI1M.gff3_genome	C	K11533	fatty acid synthase, bacteria type [EC:2.3.1.-]								Domain of unknown function (DUF1729) [PF08354.13]; DNA polymerase beta N-terminal domain [PF18094.4]; Acyl transferase domain [PF00698.24]; Starter unit:ACP transacylase in aflatoxin biosynthesis [PF16073.8]; Beta-ketoacyl synthase, C-terminal domain [PF02801.25]; MaoC like domain [PF01575.22]; Fatty acid synthase subunit alpha Acyl carrier domain [PF18325.4]; Nitronate monooxygenase [PF03060.18]…					0
ENBDON_01905_gene	SARSHI1M.gff3_genome	C	K00997	holo-[acyl-carrier protein] synthase [EC:2.7.8.7]								4'-phosphopantetheinyl transferase superfamily [PF01648.23]					0
ENBDON_01906_gene	SARSHI1M.gff3_genome	D										Tetracyclin repressor-like, C-terminal domain [PF17928.4]; Bacterial regulatory proteins, tetR family [PF00440.26]					0
ENBDON_01907_gene	SARSHI1M.gff3_genome	C	K00574	cyclopropane-fatty-acyl-phospholipid synthase [EC:2.1.1.79]								Mycolic acid cyclopropane synthetase [PF02353.23]; Methyltransferase domain [PF13489.9]; Methyltransferase domain [PF13649.9]; Methyltransferase domain [PF08241.15]; Methyltransferase domain [PF13847.9]; Methyltransferase domain [PF08242.15]					0
ENBDON_01908_gene	SARSHI1M.gff3_genome	C	K23980	cysteinylglycine-S-conjugate dipeptidase [EC:3.4.13.23]	MER0796496	M20F	MER0796496 - subfamily M20F unassigned peptidases (Rhodococcus ruber) [M20.UPF]#M20F#{peptidase unit: 20-441}~source A0A098BJW5~	TRUE	0.915	809	3.313e-263	Peptidase family M20/M25/M40 [PF01546.31]					0
ENBDON_01909_gene	SARSHI1M.gff3_genome	C	K03564	thioredoxin-dependent peroxiredoxin [EC:1.11.1.24]								AhpC/TSA family [PF00578.24]; Redoxin [PF08534.13]; SCO1/SenC [PF02630.17]; Glutathione peroxidase [PF00255.22]					0
ENBDON_01910_gene	SARSHI1M.gff3_genome	D										Protein of unknown function (DUF3618) [PF12277.11]					0
ENBDON_01911_gene	SARSHI1M.gff3_genome	D			MER0742239	C82A	MER0742239 - subfamily C82A unassigned peptidases (Rhodococcus ruber) [C82.UPA]#C82A#{peptidase unit: 140-251}~source M2XU33~	FALSE	1	244	2.474e-71	Bacterial Ig domain [PF17964.4]; L,D-transpeptidase catalytic domain [PF03734.17]					0
ENBDON_01912_gene	SARSHI1M.gff3_genome	C	K12466	(+)-trans-carveol dehydrogenase [EC:1.1.1.275]								Enoyl-(Acyl carrier protein) reductase [PF13561.9]; short chain dehydrogenase [PF00106.28]; KR domain [PF08659.13]					0
ENBDON_01913_gene	SARSHI1M.gff3_genome	C	K07496	putative transposase								Putative transposase DNA-binding domain [PF07282.14]; Probable transposase [PF01385.22]					0
ENBDON_01914_gene	SARSHI1M.gff3_genome	D			MER0213641	S33	MER0213641 - family S33 unassigned peptidases (Lactobacillus rhamnosus) [S33.UPW]#S33#{peptidase unit: 50-313}~source BAI42570~	FALSE	0.279	109	2.957e-24	Serine aminopeptidase, S33 [PF12146.11]; alpha/beta hydrolase fold [PF00561.23]; Alpha/beta hydrolase family [PF12697.10]; Alpha/beta hydrolase of unknown function (DUF1057) [PF06342.15]; Thioesterase domain [PF00975.23]; Ndr family [PF03096.17]; Serine hydrolase [PF06821.16]					0
ENBDON_01916_gene	SARSHI1M.gff3_genome	D			MER0463841	C82A	MER0463841 - subfamily C82A unassigned peptidases (Gordonia neofelifaecis) [C82.UPA]#C82A#{peptidase unit: 120-368}~source ZP_08204410~	FALSE	0.671	333	2.476e-99	Bacterial Ig domain [PF17964.4]; L,D-transpeptidase catalytic domain [PF03734.17]					0
ENBDON_01917_gene	SARSHI1M.gff3_genome	C	K17285	methanethiol oxidase [EC:1.8.3.4]								56kDa selenium binding protein (SBP56) [PF05694.14]					0
ENBDON_01919_gene	SARSHI1M.gff3_genome	C	K13288	oligoribonuclease [EC:3.1.-.-]								Exonuclease [PF00929.27]					0
ENBDON_01920_gene	SARSHI1M.gff3_genome	C	K06915	DNA double-strand break repair helicase HerA and related ATPase								Helicase HerA-like C-terminal [PF05872.15]; Type IV secretion-system coupling protein DNA-binding domain [PF10412.12]; Helicase HerA, central domain [PF01935.20]; AAA-like domain [PF12846.10]					0
ENBDON_01921_gene	SARSHI1M.gff3_genome	C	K07124	uncharacterized protein								short chain dehydrogenase [PF00106.28]; Enoyl-(Acyl carrier protein) reductase [PF13561.9]; KR domain [PF08659.13]					0
ENBDON_01922_gene	SARSHI1M.gff3_genome	C	K00219	2,4-dienoyl-CoA reductase (NADPH2) [EC:1.3.1.34]								NADH:flavin oxidoreductase / NADH oxidase family [PF00724.23]; Pyridine nucleotide-disulphide oxidoreductase [PF07992.17]; Flavin-binding monooxygenase-like [PF00743.22]; FAD binding domain [PF01494.22]; HI0933-like protein [PF03486.17]; NAD(P)-binding Rossmann-like domain [PF13450.9]; FAD dependent oxidoreductase [PF12831.10]; Pyridine nucleotide-disulphide oxidoreductase [PF00070.30]; FAD depen…					0
ENBDON_01923_gene	SARSHI1M.gff3_genome	C	K10947	PadR family transcriptional regulator, regulatory protein PadR								Virulence activator alpha C-term [PF10400.12]; Transcriptional regulator PadR-like family [PF03551.17]					0
ENBDON_01924_gene	SARSHI1M.gff3_genome	C	K06902	MFS transporter, UMF1 family								Vacuole effluxer Atg22 like [PF11700.11]; Major Facilitator Superfamily [PF07690.19]					0
ENBDON_01925_gene	SARSHI1M.gff3_genome	D										Thioesterase-like superfamily [PF13622.9]					0
ENBDON_01926_gene	SARSHI1M.gff3_genome	C	K18939	TetR/AcrR family transcriptional regulator, lmrAB and yxaGH operons repressor								Tetracyclin repressor-like, C-terminal domain [PF16925.8]; Bacterial regulatory proteins, tetR family [PF00440.26]					0
ENBDON_01927_gene	SARSHI1M.gff3_genome	C	K00135	succinate-semialdehyde dehydrogenase / glutarate-semialdehyde dehydrogenase [EC:1.2.1.16 1.2.1.79 1.2.1.20]								Aldehyde dehydrogenase family [PF00171.25]					0
ENBDON_01928_gene	SARSHI1M.gff3_genome	D			MER0132698	S33	MER0132698 - family S33 unassigned peptidases (Geodermatophilus obscurus) [S33.UPW]#S33#{peptidase unit: 2-267}~source GEBA2500700466~	TRUE	0.95	533	8.803e-171	Serine aminopeptidase, S33 [PF12146.11]; alpha/beta hydrolase fold [PF00561.23]; Alpha/beta hydrolase family [PF12697.10]; Alpha/beta hydrolase of unknown function (DUF1057) [PF06342.15]; Prolyl oligopeptidase family [PF00326.24]; Putative esterase [PF00756.23]; Esterase PHB depolymerase [PF10503.12]; Ndr family [PF03096.17]; TAP-like protein [PF08386.13]					0
ENBDON_01929_gene	SARSHI1M.gff3_genome	E															0
ENBDON_01930_gene	SARSHI1M.gff3_genome	D										LysR substrate binding domain [PF03466.23]; Bacterial regulatory helix-turn-helix protein, lysR family [PF00126.30]					0
ENBDON_01931_gene	SARSHI1M.gff3_genome	C	K07492	putative transposase								Transposase DDE domain [PF13586.9]; Transposase DDE domain [PF01609.24]; Transposase DDE domain [PF13612.9]					0
ENBDON_01932_gene	SARSHI1M.gff3_genome	C	K07492	putative transposase								Putative transposase of IS4/5 family (DUF4096) [PF13340.9]					0
ENBDON_01933_gene	SARSHI1M.gff3_genome	D										GDSL-like Lipase/Acylhydrolase family [PF13472.9]					0
ENBDON_01934_gene	SARSHI1M.gff3_genome	D			MER0226967	S33	MER0226967 - family S33 non-peptidase homologues (Rhodococcus equi) [S33.UNW]#S33#{peptidase unit: 10-271}~source YP_004007747~	TRUE	0.75	400	5.278e-125	alpha/beta hydrolase fold [PF00561.23]; Serine aminopeptidase, S33 [PF12146.11]; Alpha/beta hydrolase family [PF12697.10]; Alpha/beta hydrolase of unknown function (DUF1057) [PF06342.15]; Dienelactone hydrolase family [PF01738.21]; Prolyl oligopeptidase family [PF00326.24]; Phospholipase/Carboxylesterase [PF02230.19]					0
ENBDON_01935_gene	SARSHI1M.gff3_genome	C	K22105	TetR/AcrR family transcriptional regulator, fatty acid biosynthesis regulator								Bacterial regulatory proteins, tetR family [PF00440.26]					0
ENBDON_01936_gene	SARSHI1M.gff3_genome	C	K22770	stearoyl-CoA 9-desaturase NADPH oxidoreductase								Oxidoreductase FAD-binding domain [PF00970.27]; Oxidoreductase NAD-binding domain [PF00175.24]					0
ENBDON_01937_gene	SARSHI1M.gff3_genome	C	K22769	NADPH-dependent stearoyl-CoA 9-desaturase [EC:1.14.19.-]								Fatty acid desaturase [PF00487.27]					0
ENBDON_01938_gene	SARSHI1M.gff3_genome	E															0
ENBDON_01939_gene	SARSHI1M.gff3_genome	C	K00262	glutamate dehydrogenase (NADP+) [EC:1.4.1.4]								Glutamate/Leucine/Phenylalanine/Valine dehydrogenase [PF00208.24]; Glu/Leu/Phe/Val dehydrogenase, dimerisation domain [PF02812.21]					0
ENBDON_01940_gene	SARSHI1M.gff3_genome	D										FCD domain [PF07729.15]					0
ENBDON_01941_gene	SARSHI1M.gff3_genome	C	K03303	lactate permease								L-lactate permease [PF02652.17]					0
ENBDON_01942_gene	SARSHI1M.gff3_genome	C	K00104	glycolate oxidase [EC:1.1.3.15]								FAD linked oxidases, C-terminal domain [PF02913.22]; FAD binding domain [PF01565.26]	AA7	AA7 glucooligosaccharide oxidase (EC 1.1.3.-); chitooligosaccharide oxidase (EC 1.1.3.-); cellooligosaccharide dehydrogenase (EC 1.1.99.-)	1.1.3.-,1.1.99.-	AA7.hmm	0
ENBDON_01943_gene	SARSHI1M.gff3_genome	E															0
ENBDON_01944_gene	SARSHI1M.gff3_genome	D										haloacid dehalogenase-like hydrolase [PF00702.29]; E1-E2 ATPase [PF00122.23]; Hemerythrin HHE cation binding domain [PF01814.26]					0
ENBDON_01945_gene	SARSHI1M.gff3_genome	E															0
ENBDON_01946_gene	SARSHI1M.gff3_genome	E															0
ENBDON_01947_gene	SARSHI1M.gff3_genome	D										Family of unknown function (DUF6191) [PF19690.2]					0
ENBDON_01948_gene	SARSHI1M.gff3_genome	C	K01087	trehalose 6-phosphate phosphatase [EC:3.1.3.12]								Glycosyl hydrolase family 65 central catalytic domain [PF03632.18]; Glycosyl hydrolase family 65, N-terminal domain [PF03636.18]; Trehalose-phosphatase [PF02358.19]; Glycosyl hydrolase family 65, C-terminal domain [PF03633.18]	GH65	GH65 alpha,alpha-trehalase (EC 3.2.1.28); maltose phosphorylase (EC 2.4.1.8); trehalose phosphorylase (EC 2.4.1.64); kojibiose phosphorylase (EC 2.4.1.230); trehalose-6-phosphate phosphorylase (EC 2.4.1.216); nigerose phosphorylase (EC 2.4.1.279); 3-O-alpha-glucopyranosyl-L-rhamnose phosphorylase (EC 2.4.1.282); 1,2-alpha-glucosylglycerol phosphorylase (EC 2.4.1.332); alpha-glucosyl-1,2-beta-gala…	2.4.1.216,2.4.1.230,2.4.1.279,2.4.1.282,2.4.1.332,2.4.1.334,2.4.1.64,2.4.1.8,2.4.1.-,3.2.1.107,3.2.1.216,3.2.1.28	GH65.hmm	0
ENBDON_01949_gene	SARSHI1M.gff3_genome	E															0
ENBDON_01950_gene	SARSHI1M.gff3_genome	D										NUDIX domain [PF00293.31]					0
ENBDON_01951_gene	SARSHI1M.gff3_genome	D										short chain dehydrogenase [PF00106.28]; Enoyl-(Acyl carrier protein) reductase [PF13561.9]; KR domain [PF08659.13]; NAD dependent epimerase/dehydratase family [PF01370.24]					0
ENBDON_01953_gene	SARSHI1M.gff3_genome	C	K03519	aerobic carbon-monoxide dehydrogenase medium subunit [EC:1.2.5.3]								FAD binding domain in molybdopterin dehydrogenase [PF00941.24]; CO dehydrogenase flavoprotein C-terminal domain [PF03450.20]					0
ENBDON_01954_gene	SARSHI1M.gff3_genome	C	K03518	aerobic carbon-monoxide dehydrogenase small subunit [EC:1.2.5.3]								[2Fe-2S] binding domain [PF01799.23]; 2Fe-2S iron-sulfur cluster binding domain [PF00111.30]; 2Fe-2S iron-sulfur cluster binding domain [PF13085.9]					0
ENBDON_01955_gene	SARSHI1M.gff3_genome	C	K03520	aerobic carbon-monoxide dehydrogenase large subunit [EC:1.2.5.3]								Molybdopterin cofactor-binding domain [PF20256.1]; Molybdopterin cofactor-binding domain [PF02738.21]; Aldehyde oxidase and xanthine dehydrogenase, a/b hammerhead domain [PF01315.25]					0
ENBDON_01956_gene	SARSHI1M.gff3_genome	C	K07402	xanthine dehydrogenase accessory factor								XdhC Rossmann domain [PF13478.9]; XdhC and CoxI family [PF02625.19]; YHS domain [PF04945.16]					0
ENBDON_01957_gene	SARSHI1M.gff3_genome	D										AAA domain (dynein-related subfamily) [PF07728.17]; ATPase family associated with various cellular activities (AAA) [PF00004.32]; ATPase family associated with various cellular activities (AAA) [PF07726.14]; Hydrolytic ATP binding site of dynein motor region [PF12774.10]					0
ENBDON_01958_gene	SARSHI1M.gff3_genome	C	K07161	uncharacterized protein								VWA domain containing CoxE-like protein [PF05762.17]					0
ENBDON_01959_gene	SARSHI1M.gff3_genome	C	K02351	putative membrane protein								Cytochrome c oxidase caa3 assembly factor (Caa3_CtaG) [PF09678.13]; Copper resistance protein D [PF05425.16]					0
ENBDON_01960_gene	SARSHI1M.gff3_genome	C	K05770	translocator protein								TspO/MBR family [PF03073.18]					0
ENBDON_01961_gene	SARSHI1M.gff3_genome	D										Secretory lipase [PF03583.17]; Prolyl oligopeptidase family [PF00326.24]; Serine aminopeptidase, S33 [PF12146.11]; X-Pro dipeptidyl-peptidase (S15 family) [PF02129.21]					0
ENBDON_01962_gene	SARSHI1M.gff3_genome	E															0
ENBDON_01963_gene	SARSHI1M.gff3_genome	E															0
ENBDON_01964_gene	SARSHI1M.gff3_genome	D										ABC transporter [PF00005.30]; ABC transporter transmembrane region [PF00664.26]; RecF/RecN/SMC N terminal domain [PF02463.22]					0
ENBDON_01965_gene	SARSHI1M.gff3_genome	D			MER0745852	C96	MER0745852 - family C96 non-peptidase homologues (Streptomyces ipomoeae) [C96.UNW]#C96#{peptidase unit: 70-117}~source L1L545~	FALSE	0.765	76	7.499e-15	Transglutaminase-like superfamily [PF13471.9]					0
ENBDON_01966_gene	SARSHI1M.gff3_genome	D										Coenzyme PQQ synthesis protein D (PqqD) [PF05402.15]					0
ENBDON_01967_gene	SARSHI1M.gff3_genome	C	K01953	asparagine synthase (glutamine-hydrolysing) [EC:6.3.5.4]								Asparagine synthase [PF00733.24]					0
ENBDON_01968_gene	SARSHI1M.gff3_genome	E															0
ENBDON_01969_gene	SARSHI1M.gff3_genome	E															0
ENBDON_01970_gene	SARSHI1M.gff3_genome	E															0
ENBDON_01971_gene	SARSHI1M.gff3_genome	D										LGFP repeat [PF08310.14]					0
ENBDON_01972_gene	SARSHI1M.gff3_genome	D										Bacterial regulatory proteins, tetR family [PF00440.26]					0
ENBDON_01973_gene	SARSHI1M.gff3_genome	D										Polyketide cyclase / dehydrase and lipid transport [PF10604.12]; Activator of Hsp90 ATPase homolog 1-like protein [PF08327.14]; Polyketide cyclase / dehydrase and lipid transport [PF03364.23]					0
ENBDON_01974_gene	SARSHI1M.gff3_genome	D										Secretory lipase [PF03583.17]; Serine aminopeptidase, S33 [PF12146.11]; Prolyl oligopeptidase family [PF00326.24]; Alpha/beta hydrolase family [PF12697.10]; Chlorophyllase enzyme [PF12740.10]; Esterase FrsA-like [PF06500.14]					0
ENBDON_01975_gene	SARSHI1M.gff3_genome	D										Secretory lipase [PF03583.17]; Prolyl oligopeptidase family [PF00326.24]; Serine aminopeptidase, S33 [PF12146.11]; Chlorophyllase enzyme [PF12740.10]; Esterase FrsA-like [PF06500.14]					0
ENBDON_01976_gene	SARSHI1M.gff3_genome	C	K06020	energy-dependent translational throttle protein EttA								ABC transporter [PF00005.30]; ABC transporter [PF12848.10]					0
ENBDON_01977_gene	SARSHI1M.gff3_genome	C	K07107	acyl-CoA thioester hydrolase [EC:3.1.2.-]								Thioesterase-like superfamily [PF13279.9]; Thioesterase superfamily [PF03061.25]; Acyl-ACP thioesterase [PF01643.20]					0
ENBDON_01978_gene	SARSHI1M.gff3_genome	C	K15371	glutamate dehydrogenase [EC:1.4.1.2]								Bacterial NAD-glutamate dehydrogenase [PF05088.15]					0
ENBDON_01979_gene	SARSHI1M.gff3_genome	C	K07107	acyl-CoA thioester hydrolase [EC:3.1.2.-]								Thioesterase-like superfamily [PF13279.9]					0
ENBDON_01980_gene	SARSHI1M.gff3_genome	E															0
ENBDON_01981_gene	SARSHI1M.gff3_genome	C	K03298	drug/metabolite transporter, DME family								EamA-like transporter family [PF00892.23]					0
ENBDON_01982_gene	SARSHI1M.gff3_genome	C	K01187	alpha-glucosidase [EC:3.2.1.20]								Alpha amylase, catalytic domain [PF00128.27]	GH13; GH13_16; GH13_17; GH13_18; GH13_1; GH13_20; GH13_21; GH13_23; GH13_29; GH13_2; GH13_30; GH13_31; GH13_35; GH13_36; GH13_39; GH13_40; GH13_4	GH13 alpha-amylase (EC 3.2.1.1); pullulanase (EC 3.2.1.41); cyclomaltodextrin glucanotransferase (EC 2.4.1.19); cyclomaltodextrinase (EC 3.2.1.54); trehalose-6-phosphate hydrolase (EC 3.2.1.93); oligo-alpha-glucosidase (EC 3.2.1.10); maltogenic amylase (EC 3.2.1.133); neopullulanase (EC 3.2.1.135); alpha-glucosidase (EC 3.2.1.20); maltotetraose-forming alpha-amylase (EC 3.2.1.60); isoamylase (EC …	2.4.1.25,2.4.1.-,3.2.1.1,3.2.1.133,3.2.1.135,3.2.1.20,3.2.1.2,3.2.1.41,3.2.1.54; 2.4.1.25,3.2.1.1,3.2.1.116; 5.4.99.16; 3.2.1.20,3.2.1.48; 2.4.1.329,2.4.1.352,2.4.1.359,2.4.1.7,2.4.1.-; 2.4.1.19,2.4.1.-,3.2.1.116,3.2.1.133,3.2.1.1; 3.2.1.1,3.2.1.133,3.2.1.135,3.2.1.41,3.2.1.54,3.2.1.-; 3.2.1.20; 2.4.1.-,3.2.1.10,3.2.1.20,3.2.1.28; 3.2.1.20,3.2.1.93; 3.2.1.20; 3.2.1.10,3.2.1.1,3.2.1.20,3.2.1.21,3.…	GH13_30.hmm	0
ENBDON_01983_gene	SARSHI1M.gff3_genome	C	K06886	hemoglobin								Bacterial-like globin [PF01152.24]					0
ENBDON_01984_gene	SARSHI1M.gff3_genome	D										HNH endonuclease [PF14279.9]; HNH endonuclease [PF13395.9]; HNH endonuclease [PF01844.26]					0
ENBDON_01985_gene	SARSHI1M.gff3_genome	E															0
ENBDON_01986_gene	SARSHI1M.gff3_genome	D										Domain of unknown function (DUF5130) [PF17174.7]					0
ENBDON_01987_gene	SARSHI1M.gff3_genome	C	K01256	aminopeptidase N [EC:3.4.11.2]	MER0813286	M01	MER0813286 - family M1 unassigned peptidases (Rhodococcus aetherivorans) [M01.UPW]#M01#{peptidase unit: 214-432}~source A0A059MRH5~	TRUE	0.977	453	7.183e-134	Peptidase family M1 domain [PF01433.23]; Peptidase M1 N-terminal domain [PF17900.4]					0
ENBDON_01988_gene	SARSHI1M.gff3_genome	C	K00529	3-phenylpropionate/trans-cinnamate dioxygenase ferredoxin reductase component [EC:1.18.1.3]								Pyridine nucleotide-disulphide oxidoreductase [PF07992.17]; Reductase C-terminal [PF14759.9]; Pyridine nucleotide-disulphide oxidoreductase [PF00070.30]					0
ENBDON_01989_gene	SARSHI1M.gff3_genome	D										DSBA-like thioredoxin domain [PF01323.23]					0
ENBDON_01990_gene	SARSHI1M.gff3_genome	C	K01808	ribose 5-phosphate isomerase B [EC:5.3.1.6]								Ribose/Galactose Isomerase [PF02502.21]					0
ENBDON_01991_gene	SARSHI1M.gff3_genome	C	K05522	endonuclease VIII [EC:3.2.2.- 4.2.99.18]								Formamidopyrimidine-DNA glycosylase H2TH domain [PF06831.17]; Formamidopyrimidine-DNA glycosylase N-terminal domain [PF01149.27]; Zinc finger found in FPG and IleRS [PF06827.17]					0
ENBDON_01992_gene	SARSHI1M.gff3_genome	E															0
ENBDON_01993_gene	SARSHI1M.gff3_genome	C	K00635	diacylglycerol O-acyltransferase / wax synthase [EC:2.3.1.20 2.3.1.75]								Wax ester synthase-like Acyl-CoA acyltransferase domain [PF03007.19]; WS/DGAT C-terminal domain [PF06974.16]; Condensation domain [PF00668.23]					0
ENBDON_01994_gene	SARSHI1M.gff3_genome	C	K07090	uncharacterized protein								Sulfite exporter TauE/SafE [PF01925.22]					0
ENBDON_01995_gene	SARSHI1M.gff3_genome	D										Rhodanese-like domain [PF00581.23]					0
ENBDON_01996_gene	SARSHI1M.gff3_genome	C	K01069	hydroxyacylglutathione hydrolase [EC:3.1.2.6]								Rhodanese-like domain [PF00581.23]; Metallo-beta-lactamase superfamily [PF00753.30]					0
ENBDON_01997_gene	SARSHI1M.gff3_genome	C	K03671	thioredoxin 1								Thioredoxin [PF00085.23]; Thioredoxin-like [PF13905.9]; Redoxin [PF08534.13]; Thioredoxin-like [PF13899.9]					0
ENBDON_01998_gene	SARSHI1M.gff3_genome	E															0
ENBDON_01999_gene	SARSHI1M.gff3_genome	C	K00635	diacylglycerol O-acyltransferase / wax synthase [EC:2.3.1.20 2.3.1.75]								Wax ester synthase-like Acyl-CoA acyltransferase domain [PF03007.19]; WS/DGAT C-terminal domain [PF06974.16]; Condensation domain [PF00668.23]					0
ENBDON_02000_gene	SARSHI1M.gff3_genome	C	K01607	4-carboxymuconolactone decarboxylase [EC:4.1.1.44]								Carboxymuconolactone decarboxylase family [PF02627.23]					0
ENBDON_02003_gene	SARSHI1M.gff3_genome	C	K03545	trigger factor								Bacterial trigger factor protein (TF) [PF05697.16]; Bacterial trigger factor protein (TF) C-terminus [PF05698.17]; FKBP-type peptidyl-prolyl cis-trans isomerase [PF00254.31]					0
ENBDON_02004_gene	SARSHI1M.gff3_genome	C	K01358	ATP-dependent Clp protease, protease subunit [EC:3.4.21.92]	MER1015315	S14	MER1015315 - family S14 unassigned peptidases (Rhodococcus rhodochrous) [S14.UPW]#S14#{peptidase unit: 12-198}~source W4ACK6~	TRUE	0.948	374	2.201e-117	Clp protease [PF00574.26]					0
ENBDON_02005_gene	SARSHI1M.gff3_genome	C	K01358	ATP-dependent Clp protease, protease subunit [EC:3.4.21.92]	MER0398673	S14	MER0398673 - ClpP2 peptidase ({Streptomyces}-type) (Rhodococcus sp. JVH1) [S14.009]#S14#{peptidase unit: 10-215}~source EJJ00498~	TRUE	0.877	376	1.581e-117	Clp protease [PF00574.26]					0
ENBDON_02006_gene	SARSHI1M.gff3_genome	C	K03544	ATP-dependent Clp protease ATP-binding subunit ClpX								AAA domain (Cdc48 subfamily) [PF07724.17]; ClpX C4-type zinc finger [PF06689.16]; ATPase family associated with various cellular activities (AAA) [PF00004.32]; AAA domain (dynein-related subfamily) [PF07728.17]; C-terminal, D2-small domain, of ClpB protein [PF10431.12]; Holliday junction DNA helicase RuvB P-loop domain [PF05496.15]					0
ENBDON_02007_gene	SARSHI1M.gff3_genome	D			MER0011529	M20X	MER0011529 - family M20 unassigned peptidases (Campylobacter jejuni) [M20.UPW]#M20X#{peptidase unit: 1-415}~source Q9S3L1~	FALSE	0.244	132	7.319e-31	Sugar (and other) transporter [PF00083.27]; Major Facilitator Superfamily [PF07690.19]					0
ENBDON_02008_gene	SARSHI1M.gff3_genome	C	K09017	TetR/AcrR family transcriptional regulator								Tetracyclin repressor-like, C-terminal domain [PF17938.4]; Bacterial regulatory proteins, tetR family [PF00440.26]; Tetracyclin repressor-like, C-terminal domain [PF14514.9]					0
ENBDON_02009_gene	SARSHI1M.gff3_genome	C	K25901	quinate/shikimate dehydrogenase (NAD+) [EC:1.1.1.24]								Shikimate dehydrogenase substrate binding domain [PF08501.14]; Shikimate / quinate 5-dehydrogenase [PF01488.23]					0
ENBDON_02010_gene	SARSHI1M.gff3_genome	E															0
ENBDON_02011_gene	SARSHI1M.gff3_genome	D										Secretory lipase [PF03583.17]; Serine aminopeptidase, S33 [PF12146.11]; Chlorophyllase enzyme [PF12740.10]; Chlorophyllase [PF07224.14]					0
ENBDON_02012_gene	SARSHI1M.gff3_genome	C	K02379	FdhD protein								FdhD/NarQ family [PF02634.18]					0
ENBDON_02013_gene	SARSHI1M.gff3_genome	E															0
ENBDON_02014_gene	SARSHI1M.gff3_genome	C	K03320	ammonium transporter, Amt family								Ammonium Transporter Family [PF00909.24]					0
ENBDON_02015_gene	SARSHI1M.gff3_genome	D										Helix-turn-helix domain [PF12844.10]; Helix-turn-helix [PF01381.25]; Helix-turn-helix domain [PF13560.9]					0
ENBDON_02016_gene	SARSHI1M.gff3_genome	C	K22083	methylamine---glutamate N-methyltransferase subunit C [EC:2.1.1.21]								Conserved region in glutamate synthase [PF01645.20]; FMN-dependent dehydrogenase [PF01070.21]; Nitronate monooxygenase [PF03060.18]; Dihydroorotate dehydrogenase [PF01180.24]; IMP dehydrogenase / GMP reductase domain [PF00478.28]					0
ENBDON_02017_gene	SARSHI1M.gff3_genome	C	K22082	methylamine---glutamate N-methyltransferase subunit B [EC:2.1.1.21]								GXGXG motif [PF01493.22]					0
ENBDON_02018_gene	SARSHI1M.gff3_genome	C	K22081	methylamine---glutamate N-methyltransferase subunit A [EC:2.1.1.21]	MER0227003	C44	MER0227003 - family C44 unassigned peptidases (Rhodococcus equi) [C44.UPW]#C44#{peptidase unit: 2-298}~source YP_004008612~	TRUE	0.783	477	4.306e-151	Glutamine amidotransferase domain [PF13522.9]; Glutamine amidotransferase domain [PF13537.9]					0
ENBDON_02019_gene	SARSHI1M.gff3_genome	C	K01915	glutamine synthetase [EC:6.3.1.2]								Glutamine synthetase, catalytic domain [PF00120.27]; Glutamine synthetase N-terminal domain [PF16952.8]					0
ENBDON_02020_gene	SARSHI1M.gff3_genome	C	K04030	ethanolamine utilization protein EutQ								Ethanolamine utilisation protein EutQ [PF06249.15]; EutQ-like cupin domain [PF05899.15]					0
ENBDON_02021_gene	SARSHI1M.gff3_genome	C	K22344	dimethylamine monooxygenase subunit C [EC:1.14.13.238]													0
ENBDON_02022_gene	SARSHI1M.gff3_genome	C	K22343	dimethylamine monooxygenase subunit B [EC:1.14.13.238]								Oxidoreductase FAD-binding domain [PF00970.27]; 2Fe-2S iron-sulfur cluster binding domain [PF00111.30]; Oxidoreductase NAD-binding domain [PF00175.24]					0
ENBDON_02023_gene	SARSHI1M.gff3_genome	C	K22342	dimethylamine monooxygenase subunit A [EC:1.14.13.238]								Protein of unknown function (DUF3445) [PF11927.11]					0
ENBDON_02024_gene	SARSHI1M.gff3_genome	C	K22344	dimethylamine monooxygenase subunit C [EC:1.14.13.238]													0
ENBDON_02025_gene	SARSHI1M.gff3_genome	C	K22342	dimethylamine monooxygenase subunit A [EC:1.14.13.238]								Protein of unknown function (DUF3445) [PF11927.11]					0
ENBDON_02026_gene	SARSHI1M.gff3_genome	C	K06443	lycopene beta-cyclase [EC:5.5.1.19]								Lycopene cyclase protein [PF05834.15]					0
ENBDON_02027_gene	SARSHI1M.gff3_genome	C	K07315	phosphoserine phosphatase RsbU/P [EC:3.1.3.3]								Stage II sporulation protein E (SpoIIE) [PF07228.15]; Histidine kinase-like ATPase domain [PF13581.9]; PAS fold [PF08448.13]					0
ENBDON_02028_gene	SARSHI1M.gff3_genome	D										FAD dependent oxidoreductase [PF01266.27]; FAD binding domain [PF00890.27]					0
ENBDON_02029_gene	SARSHI1M.gff3_genome	D										Acetyltransferase (GNAT) family [PF00583.28]					0
ENBDON_02030_gene	SARSHI1M.gff3_genome	E															0
ENBDON_02031_gene	SARSHI1M.gff3_genome	D			MER0996831	S09B	MER0996831 - subfamily S9B unassigned peptidases (Rhodococcus ruber) [S09.UPB]#S09B#{peptidase unit: 406-648}~source A0A098BIR0~	TRUE	1	523	2.248e-160	Prolyl oligopeptidase family [PF00326.24]; Acetyl xylan esterase (AXE1) [PF05448.15]; Esterase FrsA-like [PF06500.14]; BD-FAE [PF20434.1]; Dienelactone hydrolase family [PF01738.21]; Esterase PHB depolymerase [PF10503.12]; Phospholipase/Carboxylesterase [PF02230.19]; Abhydrolase family [PF12715.10]; Serine aminopeptidase, S33 [PF12146.11]					0
ENBDON_02032_gene	SARSHI1M.gff3_genome	C	K01873	valyl-tRNA synthetase [EC:6.1.1.9]								tRNA synthetases class I (I, L, M and V) [PF00133.25]; Anticodon-binding domain of tRNA ligase [PF08264.16]; tRNA synthetases class I (M) [PF09334.14]; Valyl tRNA synthetase tRNA binding arm [PF10458.12]; Leucyl-tRNA synthetase, Domain 2 [PF13603.9]; tRNA synthetases class I (K) [PF01921.21]					0
ENBDON_02033_gene	SARSHI1M.gff3_genome	C	K11754	dihydrofolate synthase / folylpolyglutamate synthase [EC:6.3.2.12 6.3.2.17]								Mur ligase middle domain [PF08245.15]; Mur ligase family, glutamate ligase domain [PF02875.24]					0
ENBDON_02034_gene	SARSHI1M.gff3_genome	D										Protein of unknown function (DUF4233) [PF14017.9]					0
ENBDON_02035_gene	SARSHI1M.gff3_genome	C	K00940	nucleoside-diphosphate kinase [EC:2.7.4.6]								Nucleoside diphosphate kinase [PF00334.22]					0
ENBDON_02036_gene	SARSHI1M.gff3_genome	C	K08300	ribonuclease E [EC:3.1.26.12]								Ribonuclease E/G family [PF10150.12]; Translation initiation factor IF-2, N-terminal region [PF04760.18]					1
ENBDON_02037_gene	SARSHI1M.gff3_genome	C	K02888	large subunit ribosomal protein L21								Ribosomal prokaryotic L21 protein [PF00829.24]					0
ENBDON_02038_gene	SARSHI1M.gff3_genome	C	K02899	large subunit ribosomal protein L27								Ribosomal L27 protein [PF01016.22]					0
ENBDON_02039_gene	SARSHI1M.gff3_genome	C	K03979	GTPase [EC:3.6.5.-]								GTP1/OBG [PF01018.25]; Domain of unknown function (DUF1967) [PF09269.14]; 50S ribosome-binding GTPase [PF01926.26]; Ferrous iron transport protein B [PF02421.21]; ADP-ribosylation factor family [PF00025.24]					0
ENBDON_02040_gene	SARSHI1M.gff3_genome	C	K00931	glutamate 5-kinase [EC:2.7.2.11]								Amino acid kinase family [PF00696.31]; PUA domain [PF01472.23]					0
ENBDON_02041_gene	SARSHI1M.gff3_genome	C	K11414	NAD+-dependent protein deacetylase sirtuin 4 [EC:2.3.1.286]								Sir2 family [PF02146.20]					0
ENBDON_02042_gene	SARSHI1M.gff3_genome	D										D-isomer specific 2-hydroxyacid dehydrogenase, NAD binding domain [PF02826.22]; D-isomer specific 2-hydroxyacid dehydrogenase, catalytic domain [PF00389.33]					0
[truncated: 3,171 more rows]
