# Supplementary material for: Whole Genome of Petroleum Hydrocarbon Degrading Rhodococcus indonesiensis isolated from Nacharam, Hyderabad, India
Source: Research Square preprint supplement (doi:10.21203/rs.3.rs-6309542/v1), 2025-09-26
Supplement: Supplementary file 3 [file 314b777acdf38655f18d509c.docx]

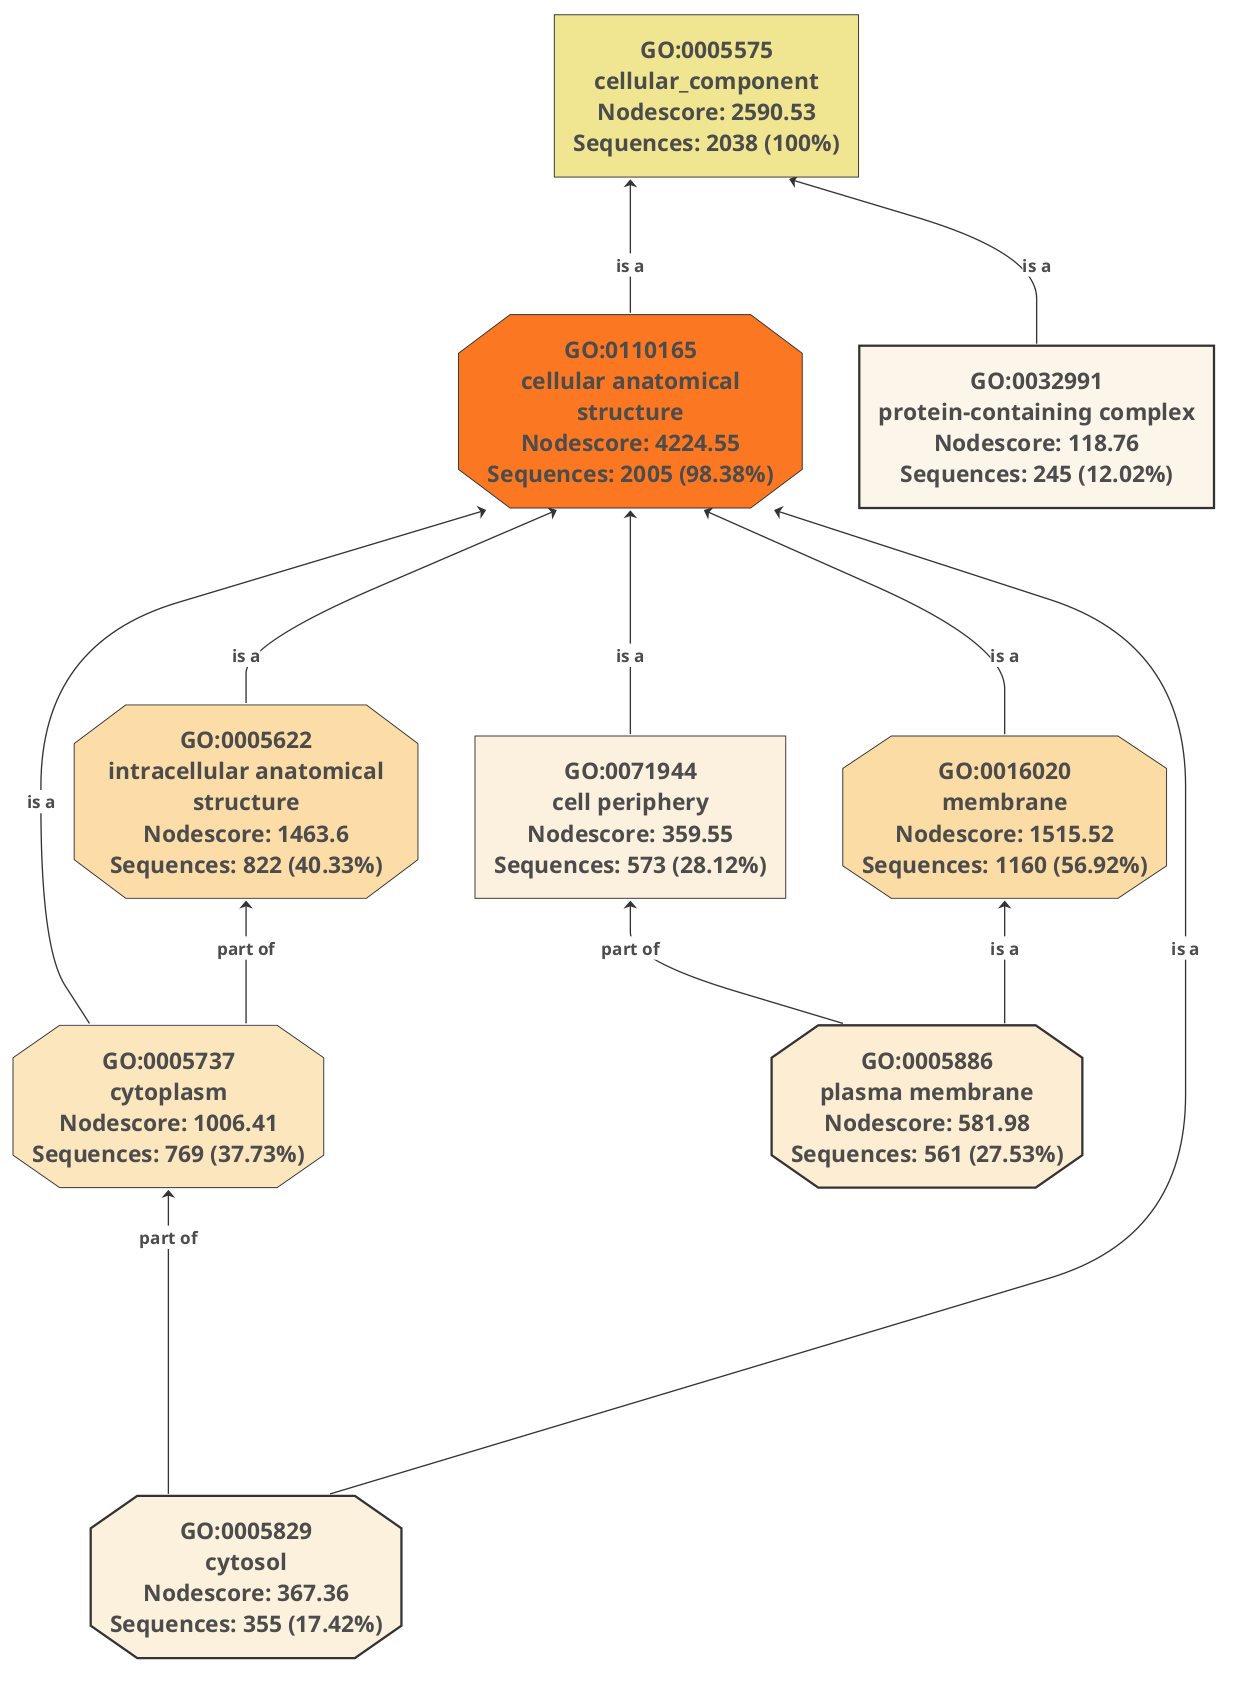


**Fig. 1 Cellular Component Ontology Graph**


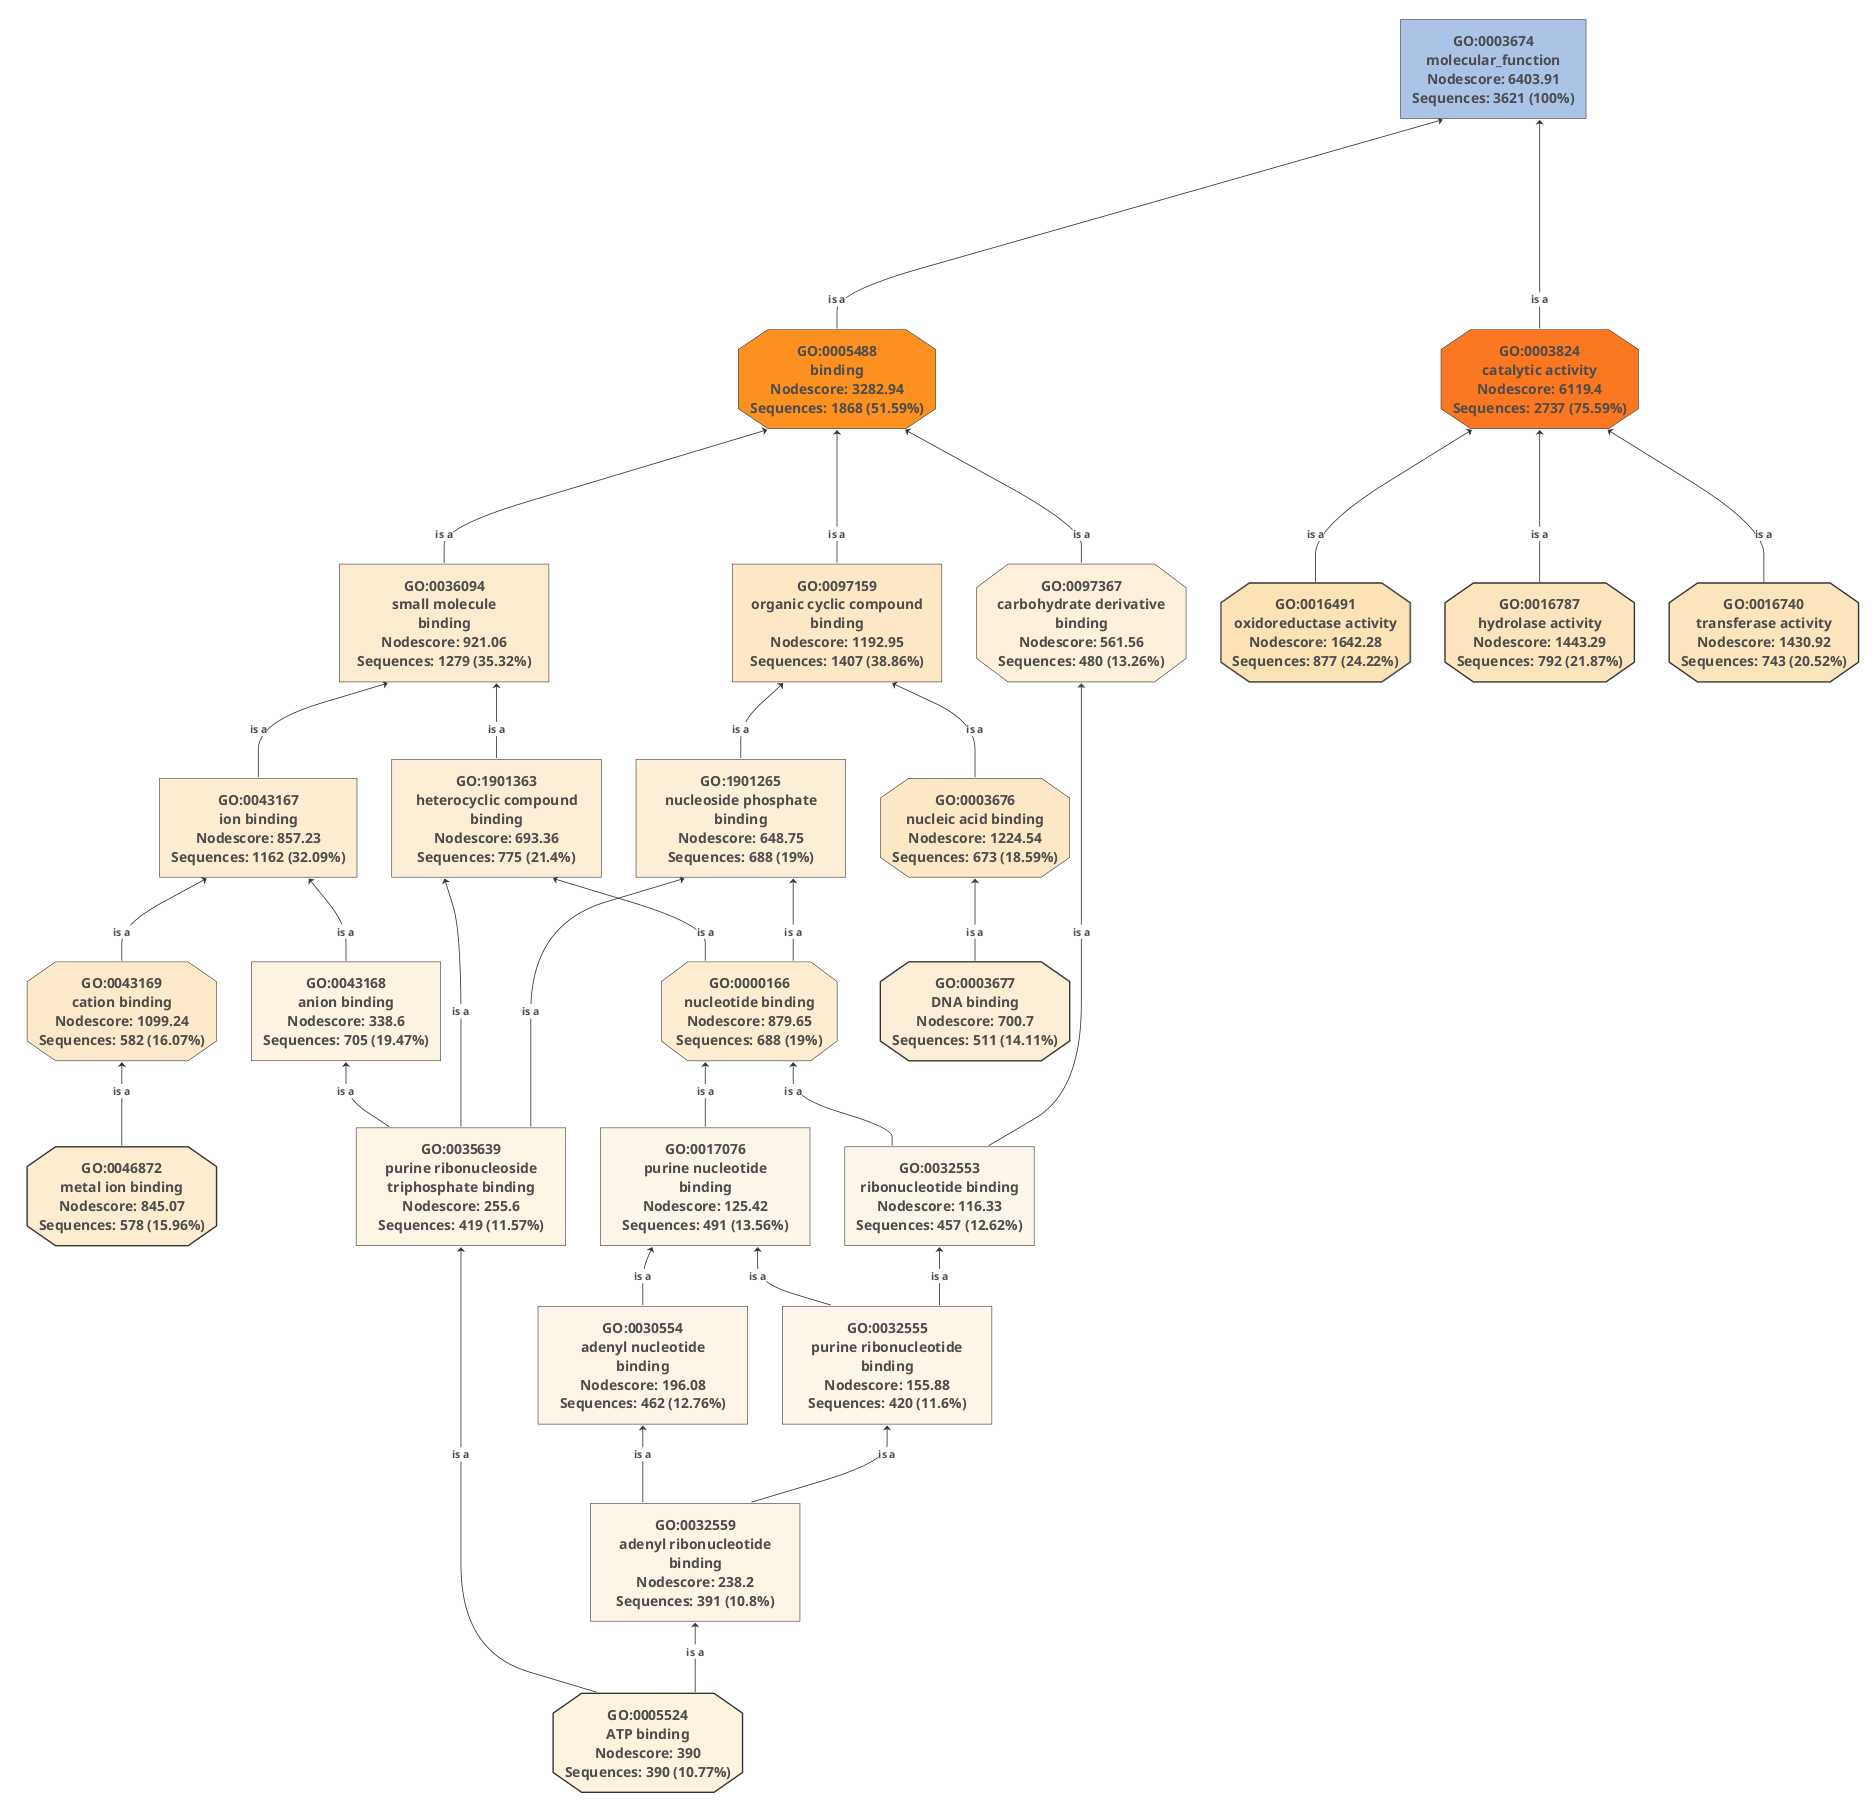


**Fig. 2 Molecular Component Ontology Graph**


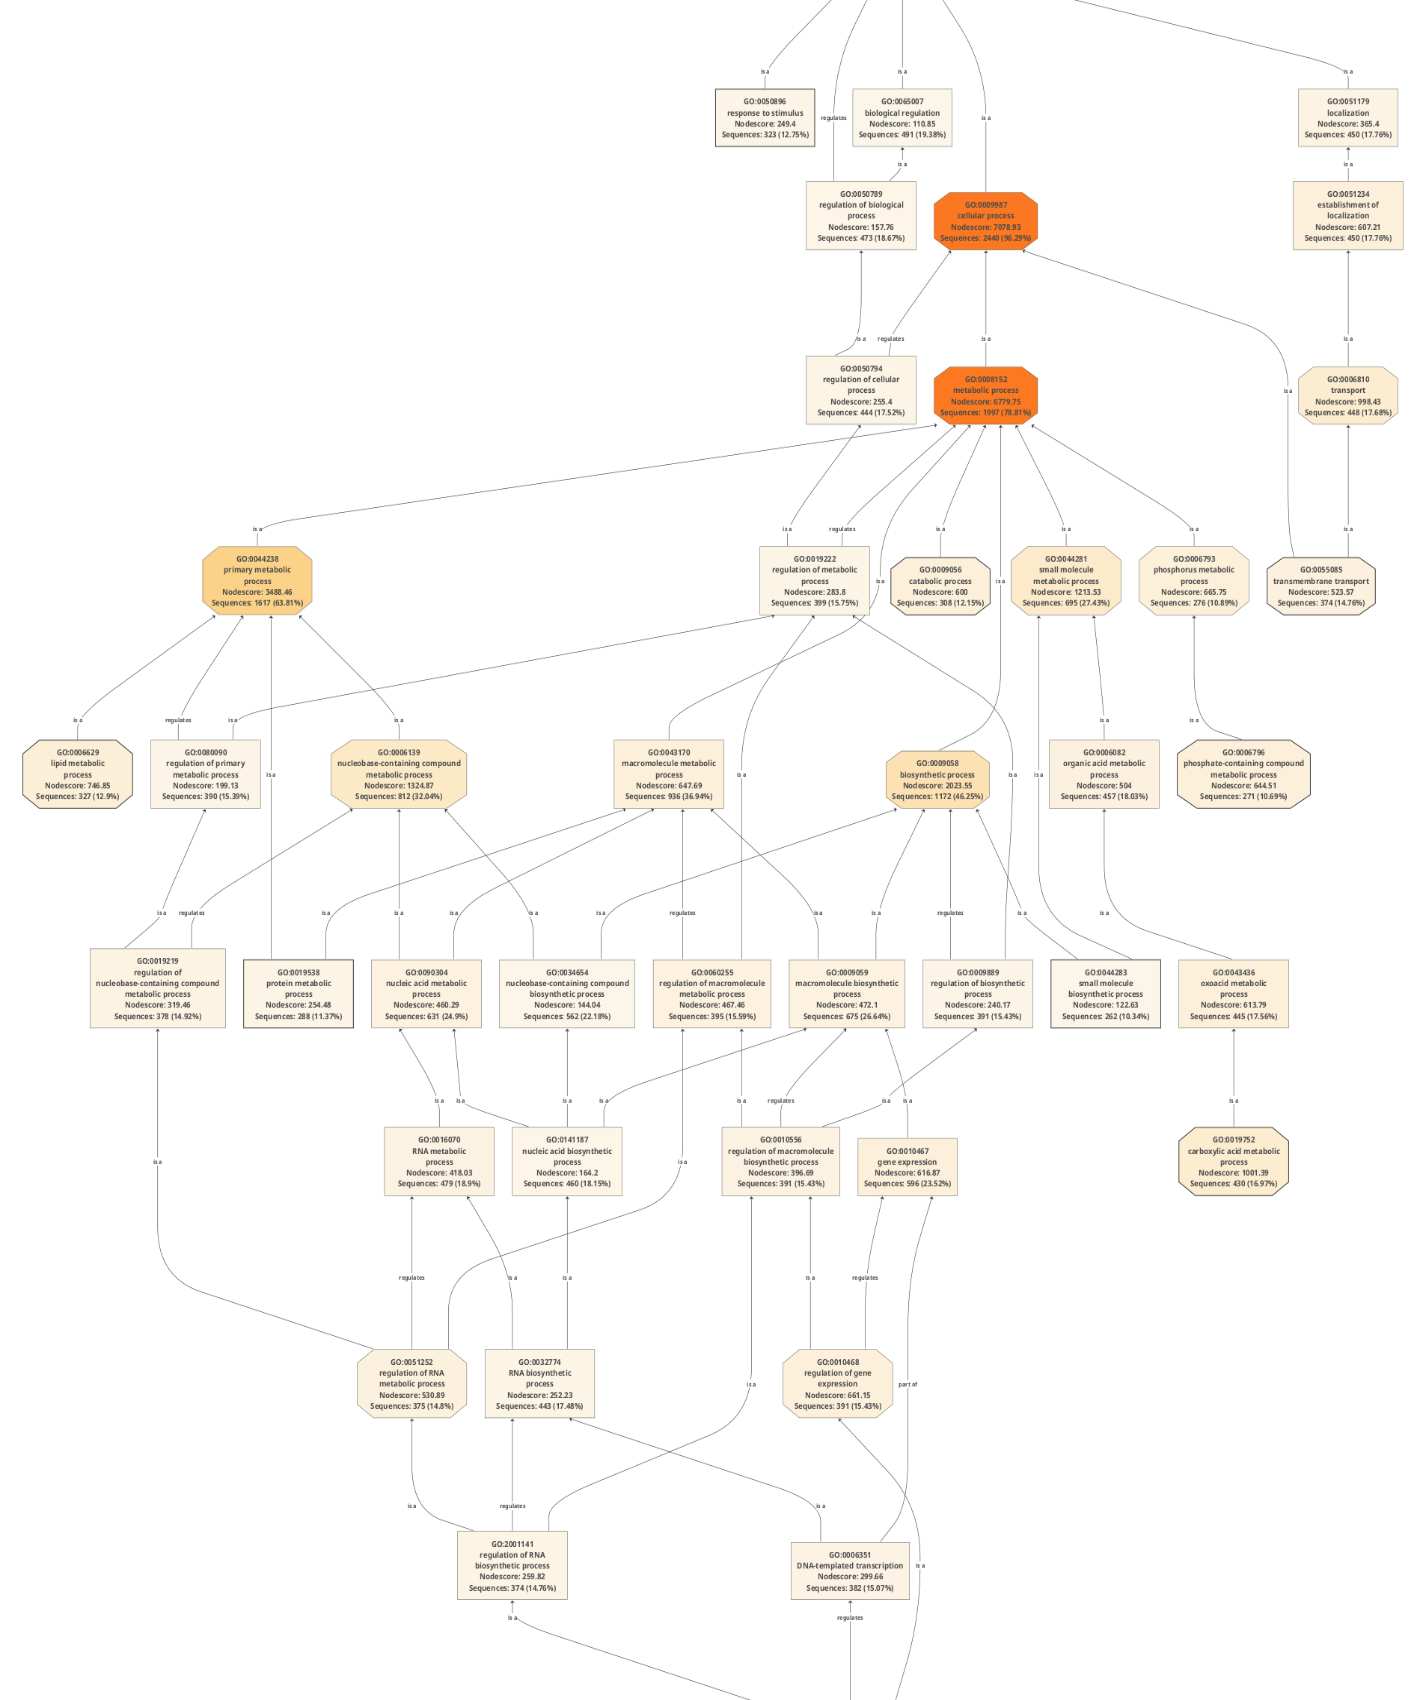


**Fig. 3 Biological Process Ontology Graph**
