# Supplementary material for: Whole Genome of Petroleum Hydrocarbon Degrading Rhodococcus indonesiensis isolated from Nacharam, Hyderabad, India
Source: Research Square preprint supplement (doi:10.21203/rs.3.rs-6309542/v1), 2025-09-26
Supplement: Supplementary file 4 [file 45c38283bdc849d3949787af.xlsx]

## Sheet: HADEG_1
Protein_ID	Gene_name	SARSHI1.faa
Q9HWT7	hpaB	ENBDON_03865,ENBDON_04669,ENBDON_01503
Q52039	bphX2	ENBDON_00686,ENBDON_04242
O85764	ssuD	ENBDON_04923
P15110	pcaH	ENBDON_04634
P51015	bphI	ENBDON_00687
P95607	catA	ENBDON_03864,ENBDON_04665
Q768T2	prmD	ENBDON_05048
Q768T5	prmA	ENBDON_05051
Q93DM7	alkB	ENBDON_04319
A4IU28	LadA	ENBDON_04926
GOM1	almA	ENBDON_04476
GOM3_benA	benA	ENBDON_04674
GOM3_benB	benB	ENBDON_04675
GOM3_benC	benC	ENBDON_04676
GOM3_benD	benD	ENBDON_04677
GOM3_catC	catC	ENBDON_04663
GOM3_nagK	nagK	ENBDON_01669
GOM3_nagL	nagL	ENBDON_01670
GOM3_pcaR	pcaR	ENBDON_04638
GOM3_xlnE	xlnE	ENBDON_01668
P0A102	pcaJ	ENBDON_04632
P0A4E9	alkG_rubA3_rdx	ENBDON_04320
P0A4F1	alkG_rubA4_rdx	ENBDON_04321
P20371	pcaG	ENBDON_02075
P20372	pcaH	ENBDON_02076
P43503	xylC	ENBDON_01651
P51014	bphF	ENBDON_04241
Q02UU0	ahpC	ENBDON_00925
Q0SJK7	prmC	ENBDON_05049
Q0SJK8	prmB	ENBDON_05050
Q9I3H5	BVMO	ENBDON_01596
Q9I6Z2	ahpF	ENBDON_00924

## Sheet: HADEG_2
Mechanism	Compound	Pathway	Subpathway	Gene	SARSHI1.faa
Ae_Aerobic	A_Alkanes	A_Auxiliar_alkane_gene	A_Auxiliar_alkane_gene	AeAA_ssuD	1
Ae_Aerobic	A_Alkanes	A_Finnerty_pathway	A_Finnerty_pathway	AeAB_ahpC	1
Ae_Aerobic	A_Alkanes	A_Finnerty_pathway	A_Finnerty_pathway	AeAB_ahpF	1
Ae_Aerobic	A_Alkanes	A_Subterminal_oxidation	A_Subterminal_oxidation	AeAD_BVMO	1
Ae_Aerobic	A_Alkanes	A_Subterminal_oxidation	A_Subterminal_oxidation	AeAD_prmA	1
Ae_Aerobic	A_Alkanes	A_Subterminal_oxidation	A_Subterminal_oxidation	AeAD_prmB	1
Ae_Aerobic	A_Alkanes	A_Subterminal_oxidation	A_Subterminal_oxidation	AeAD_prmC	1
Ae_Aerobic	A_Alkanes	A_Subterminal_oxidation	A_Subterminal_oxidation	AeAD_prmD	1
Ae_Aerobic	A_Alkanes	A_Terminal/biterminal_oxidation	A_Terminal/biterminal_oxidation	AeAE_alkB	1
Ae_Aerobic	A_Alkanes	A_Terminal/biterminal_oxidation	A_Terminal/biterminal_oxidation	AeAE_almA	1
Ae_Aerobic	A_Alkanes	A_Terminal/biterminal_oxidation	A_Terminal/biterminal_oxidation	AeAE_LadA	1
Ae_Aerobic	A_Alkanes	A_Terminal/biterminal_oxidation	A_Terminal/biterminal_oxidation	AeAE_rdx	2
Ae_Aerobic	C_Aromatics	C_4-Hydroxyphenylacetate_degradation	C_4-Hydroxyphenylacetate_degradation	AeCD_hpaB	3
Ae_Aerobic	C_Aromatics	C_Benzoate_degradation	C_Benzoate_degradation_I	AeCHI_benA	1
Ae_Aerobic	C_Aromatics	C_Benzoate_degradation	C_Benzoate_degradation_I	AeCHI_benB	1
Ae_Aerobic	C_Aromatics	C_Benzoate degradation	C_Benzoate_degradation_I	AeCHI_benC	1
Ae_Aerobic	C_Aromatics	C_Benzoate_degradation	C_Benzoate_degradation_I	AeCHI_benD	1
Ae_Aerobic	C_Aromatics	C_Biphenyl_degradation	C_Biphenyl_degradation	AeCI_bphF	1
Ae_Aerobic	C_Aromatics	C_Biphenyl_degradation	C_Biphenyl_degradation	AeCI_bphI	1
Ae_Aerobic	C_Aromatics	C_Biphenyl_degradation	C_Biphenyl_degradation	AeCI_bphX2	2
Ae_Aerobic	C_Aromatics	C_Catechol_degradation	C_Catechol_degradation_ortho-cleavage	AeCKII_catA	2
Ae_Aerobic	C_Aromatics	C_Catechol_degradation	C_Catechol_degradation_ortho-cleavage	AeCKII_catC	1
Ae_Aerobic	C_Aromatics	C_Catechol_degradation	C_Catechol_degradation_ortho-cleavage	AeCKII_pcaJ	1
Ae_Aerobic	C_Aromatics	C_Gentisate_degradation	C_Gentisate_degradation_I	AeCRI_nagK	1
Ae_Aerobic	C_Aromatics	C_Gentisate_degradation	C_Gentisate_degradation_I	AeCRI_nagL	1
Ae_Aerobic	C_Aromatics	C_Gentisate_degradation	C_Gentisate_degradation_I	AeCRI_xlnE	1
Ae_Aerobic	C_Aromatics	C_Protocatechuate_degradation	C_Protocatechuate_degradation_ortho-cleavage	AeCZBII_pcaG	1
Ae_Aerobic	C_Aromatics	C_Protocatechuate_degradation	C_Protocatechuate_degradation_ortho-cleavage	AeCZBII_pcaH	2
Ae_Aerobic	C_Aromatics	C_Protocatechuate_degradation	C_Protocatechuate_degradation_ortho-cleavage	AeCZBII_pcaR	1
Ae_Aerobic	C_Aromatics	C_Toluene_degradation	C_Toluene/Dimethylbenzene_degradation	AeCZGI_xylC	1
