# Supplementary material for: Whole Genome of Petroleum Hydrocarbon Degrading Rhodococcus indonesiensis isolated from Nacharam, Hyderabad, India
Source: Research Square preprint supplement (doi:10.21203/rs.3.rs-6309542/v1), 2025-09-26
Supplement: Supplementary file 5 [file 4922f21c7727c94779fbbdb8.docx]

**Table 1 Petroleum Hydrocarbon Degradation Genes**

| ***S. No*** | ***Gene*** | **Organism** | **Reference** |
| --- | --- | --- | --- |
|  | *acxABC* | *Xanthobacter autotrophicus* | [1] |
|  | *bagI* | *P. putida* | [1] |
|  | *bagK* | *P. putida* | [1] |
|  | *bphB* | *Pseudomonas pseudoalcaligenes KF707.* | [1] |
|  | *bphC* | *Pseudomonas pseudoalcaligenes KF707.* | [1] |
|  | *bphD* | *Pseudomonas pseudoalcaligenes KF707.* | [1] |
|  | *bphX0* | *Pseudomonas pseudoalcaligenes KF707.* | [1] |
|  | *bphX1* | *Pseudomonas pseudoalcaligenes KF707.* | [1] |
|  | *bphX2* | *Pseudomonas pseudoalcaligenes KF707.* | [1] |
|  | *bphX3* | *Pseudomonas pseudoalcaligenes KF707.* | [1] |
|  | *cddA* | *Rhodococcus ruber SC1* | [1] |
|  | *cddB* | *Rhodococcus ruber SC1* | [1] |
|  | *cddC* | *Rhodococcus ruber SC1* | [1] |
|  | *cddD* | *Rhodococcus ruber SC1* | [1] |
|  | *chnB* | *Acinetobacter SE19* | [1] |
|  | *chnE* | *Acinetobacter SE19* | [1] |
|  | *chnR* | *Acinetobacter SE19* | [1] |
|  | *cph I* | *Arthrobacter chlorophenolicus A6* | [1] |
|  | *cphR* | *Arthrobacter chlorophenolicus A6* | [1] |
|  | *cphS* | *Arthrobacter chlorophenolicus A6* | [1] |
|  | *dntAaAbAcAd* | *Acidovorax sp. JS42, B. cepacia R34* | [1] |
|  | *dntB* | *Acidovorax sp. JS42, B. cepacia R34* | [1] |
|  | *dntC* | *Acidovorax sp. JS42, B. cepacia R34* | [1] |
|  | *dntD* | *Acidovorax sp. strain JS42, B. cepacia R34* | [1] |
|  | *dntE* | *Acidovorax sp. strain JS42, B. cepacia R34* | [1] |
|  | *dntG* | *Acidovorax sp. strain JS42, B. cepacia R34* | [1] |
|  | *ebdABC* | *D. alkenivorans AK-01* | [1] |
|  | *fabK1* | *D. alkenivorans AK-01* | [1] |
|  | *fabK2* | *D. alkenivorans AK-01* | [1] |
|  | *geoA* | *Castellaniella defragrans* | [1] |
|  | *geoB* | *Castellaniella defragrans* | [1] |
|  | *mcrBGAC* | *Methanotrophic bacteria* | [1] |
|  | *npdA1* | *Arthrobacter sp. JS443* | [1] |
|  | *npdA2* | *Arthrobacter sp. JS443* | [1] |
|  | *npdB* | *Arthrobacter sp. JS443* | [1] |
|  | *npdR* | *A. chlorophenolicus A6* | [1] |
|  | *nphA1* | *Pseudomonas* | [1] |
|  | *todA* | *P. putida Fl* | [1] |
|  | *todB* | *P. putida Fl* | [1] |
|  | *todC1* | *P. putida Fl* | [1] |
|  | *todC2* | *P. putida Fl* | [1] |
|  | *todD* | *P. putida Fl* | [1] |
|  | *todE* | *P. putida Fl* | [1] |
|  | *todF* | *P. putida Fl* | [1] |
|  | *mmoX* | *Methylococcus* | [2] |
|  | *bzlA* | *Unclassified clostridia* | [3] |
|  | *pimBE* | *Clostridium* | [3] |
|  | *dmpF* | *Azoarcus sp. BH72* | [3] |
|  | *dmpG* | *Limnobacter sp. MED105* | [3] |
|  | *dmpI* | *Desulfosporosinus orientis* | [3] |
|  | *dmpL* | *Dechloromonas aromatica* | [3] |
|  | *dmpP* | *Azoarcus toluclasticus* | [3] |
|  | *hcrL* | *Unclassified Clostridia* | [3] |
|  | *ppcC* | *Unclassified Clostridia* | [3] |
|  | *hcrA* | *Unclassified Clostridia* | [3] |
|  | *paaF* | *Desulfosporosinus youngiae* | [3] |
|  | *badF* | *Desulfotomaculum gibsoniae* | [3] |
|  | *bzdQ* | *Desulfotomaculum gibsoniae* | [3] |
|  | *dmpH* | *Thermincola potens* | [3] |
|  | *dmpM* | *Rhodocyclaceae* | [3] |
|  | *tdn* | *P. putida UCC227* | [3] |
|  | *tmoD* | *Pseudomonas aeruginosa* | [3] |
|  | *gcdBC* | *Syntrophus aciditrophicus* | [3] |
|  | *phe* | *Bacillus thermoglucosidasius A7* | [3] |
|  | *nah* | *Rhodococcus pyridinivorans* | [4] |
|  | *roxA* | *Rhodococcus jostii* | [5] |
|  | *ompST* | *Alcanivorax dieselolei KS 293* | [6] |
|  | *BaP1* | *Bacillus subtilis BMT* | [7] |
|  | *nap* | *Mycobacterium vanbaalenii PYR-1* | [8] |
|  | *nidA* | *M. vanbaalenii PYR-1* | [8], [9] |
|  | *alkH* | *Rhodococcus erythropolis* | [10] |
|  | *nahA3* | *Pseudomonas* | [11] |
|  | *abrB* | *Geotalea daltonii FRC-32* | [12] |
|  | *lptCAB* | *Geotalea daltonii FRC-32* | [12] |
|  | *rpoN* | *Geotalea daltonii FRC-32* | [12] |
|  | *CYP52* | *Acinetobacter* | [13] |
|  | *RHDα* | *Pseudoxanthomonas* | [14] |
|  | *NmsA* | *Desulfuromonadales MAG (GB_003647135)* | [15] |
|  | *ackA* | *Desulfobacterales* | [15] |
|  | *Pta* | *Desulfobacterales* | [15] |
|  | *AssA* | *Vallitalea guaymasensis strain L81* | [15] |
|  | *faeABC* | *Dehalococcoidia* | [15] |
|  | *narGH* | *Archaeoglobi* | [15] |
|  | *amiE* | *Micrococcus luteus CBMAI 636, Dietzia kunjamensis CBMAI 705, Bacillus subtilis CBMAI 707* | [16] |
|  | *ethA* | *Micrococcus luteus CBMAI 636, Dietzia kunjamensis CBMAI 705* | [16] |
|  | *feaB* | *Dietzia kunjamensis CBMAI 705, Achromobacter xylosoxidans CBMAI 709* | [16] |
|  | *maiA* | *Achromobacter xylosoxidans CBMAI 709* | [16] |
|  | *nthA* | *Achromobacter xylosoxidans CBMAI 709* | [16] |
|  | *oxdB* | *Achromobacter xylosoxidans CBMAI 709* | [16] |
|  | *bssA* | *Bacillus subtilis CBMAI 707* | [16] |
|  | *CN32* | *Shewanella putrefaciens* | [16] |
|  | *benABCD* | *R. qingshengii GOMB7* | [17] |
|  | *hpcB* | *Acinetobacter johnsonii C4* | [18] |
|  | *etbA1A3A3A4* | *Rhodococcus sp.* WAY | [19] |
|  | *bphEDA4A3A2aA1aCB)* | *Rhodococcus sp.* WAY | [19] |
|  | *MAH_alpha and MAH_betaclB* | *Halioglobus and Acidimicrobiales* | [20] |
|  | *AbcA* | *Halioglobus and Acidimicrobiales* | [20] |
|  | *pBmoABC* | *Halioglobus and Acidimicrobiales* | [20] |
|  | *cmdA* | *Halioglobus and Acidimicrobiales* | [20] |
|  | *NmsA* | *Halioglobus and Acidimicrobiales* | [20] |
|  | *sBmoXYZ* | *Halioglobus and Acidimicrobiales* | [20] |
|  | *LasI* | *P. putida AQ8* | [21] |
|  | *cas* | *Pseudoxanthomonas* | [22] |
|  | *dsm3043* | *C. salexigens* | [23] |
|  | *nahAc* | *γ-proteobacteria* | [24] |
|  | *nagAc* | *β-proteobacteria* | [24] |
|  | *rhdA* | *Cycloclasticus sp.* | [25] |
|  | *hbaA* | *Rhodopseudomonas palustris.* | [26] |
|  | *dfdA1A2A3A4* | *Nocardioides sp. DF412* | [27] |
|  | *tbc* | *Burkholderia sp.* | [27] |
|  | *nifK* | *Pseudomonas stutzeri* | [28] |
|  | *ArcA* | *Bacillus cereus P21* | [28] |
|  | *carB* | *Mycobacterium sp.* | [28] |
|  | *pobA* | *Pseudomonas aeruginosa* | [29] |
|  | *cphy* | *P. limnophilus* | [30] |
|  | *eutN* | *S. enterica* | [30] |
|  | *pduA* | *S. enterica* | [30] |
|  | *pduB* | *S. enterica* | [30] |
|  | *pduL* | *S. enterica* | [30] |
|  | *pduN* | *S. enterica* | [30] |
|  | *pvmO* | *P. limnophilus* | [30] |
|  | *paa* | *Bacillus licheniformis* | [31] |
|  | *napAB* | *Dokdonia* | [32] |
|  | *yiaY* | *Citrobacter portucalensis* | [32] |
|  | *tmoCF* | Bacterial consortium | [33] |
|  | *nifHDK* | *Azoarcus sp.* | [34] |
|  | *MopN* | *Acinetobacter calcoaceticus* | [35] |
|  | *PhhN* | *P. putida* | [35] |
|  | *PoxD* | *Ralstonia eutropha* | [35] |
|  | *DQ12-45-1b* | *Dietzia sp.* | [36] |
|  | *frdABC* | *Rhodococcus sp.* | [37] |
|  | *maeB* | *Rhodococcus sp.* | [37] |
|  | *pycAB* | *Rhodococcus sp.* | [37] |
|  | *PAO1* | *Pseudomonas aeruginosa* | [38] |
|  | *nar* | *Rhodococcus sp. NCIMB12038* | [38] |
|  | *dox* | *Pseudomonas sp. C18* | [38] |
|  | *phd* | *Comamonas testosteroni GZ39* | [38] |
|  | *bdhA* | Ca.*Cycloclasticus GSC22* | [39] |
|  | *pmoAC* | *Ca. Cycloclasticus GSC8* | [39] |
|  | *mmoXY* | *Gammaproteobacterium* | [39] |
|  | *todX* | *Pseudomonas putida* | [40] |
|  | *ntdAc* | *Pseudomonas putida* | [41] |
|  | *pahAc* | *Pseudomonas aeruginosa* | [41] |
|  | *bpdB* | *Rhodococcus sp. M5* | [41] |
|  | *bssABC* | *T. aromatica* | [42] |
|  | *tutE* | *Thauera sp. T1* | [42] |
|  | *pahA* | *Sphingomonas, Mycobacterium, Rhodococcus* | [43] |
|  | *PAH-RHDα* | *Sphingomonas koreensis* | [43] |
|  | *pah* | *Comamonas testosteroni* | [44] |
|  | *phdC* | *Oceanospirillales,* | [44] |
|  | *phn* | *Comamonas testosteroni* | [44] |
|  | *nahL* | Metagenome | [44] |
|  | *hgdB* | *Ferroglobus placidus* | [45] |
|  | *hclA* | *Ferroglobus placidus* | [45] |
|  | *ppcX1X2* | *Ferroglobus placidus* | [45] |
|  | *ppcY* | *Ferroglobus placidus* | [45] |
|  | *cmtACDE* | *Pseudomonas* | [46] |
|  | *badI* | Bacterial consortium | [46] |
|  | *benA-xylX* | *Enterobacter, Pseudomonas, Acinetobacter* | [46] |
|  | *benB-xylY* | *Enterobacter, Pseudomonas, Acinetobacter* | [46] |
|  | *benC-xylZ* | *Enterobacter, Pseudomonas, Acinetobacter* | [46] |
|  | *bphH* | Bacterial consortium | [46] |
|  | *desB* | Bacterial consortium | [46] |
|  | *dmpK* | *Pseudomonas* | [46] |
|  | *hpaD* | *Enterobacter, Pseudomonas, Acinetobacter* | [46] |
|  | *hpaE* | *Enterobacter, Pseudomonas, Acinetobacter* | [46] |
|  | *hpaF* | *Enterobacter, Pseudomonas, Acinetobacter* | [46] |
|  | *hpaG* | *Enterobacter, Pseudomonas, Acinetobacter* | [46] |
|  | *hpcC* | *Enterobacter, Pseudomonas, Acinetobacter* | [46] |
|  | *lpdC* | Bacterial consortium | [46] |
|  | *mhpA* | *Enterobacter, Pseudomonas, Acinetobacter* | [46] |
|  | *mhpB* | *Enterobacter, Pseudomonas, Acinetobacter* | [46] |
|  | *mhpC* | *Enterobacter, Pseudomonas, Acinetobacter* | [46] |
|  | *nagH* | *Enterobacter, Pseudomonas, Acinetobacter* | [46] |
|  | *nahD* | *Enterobacter, Pseudomonas, Acinetobacter* | [46] |
|  | *nahO* | *Enterobacter, Pseudomonas, Acinetobacter* | [46] |
|  | *tesE* | *Enterobacter, Pseudomonas, Acinetobacter* | [46] |
|  | *tphA1* | Bacterial consortium | [46] |
|  | *tphA2* | Bacterial consortium | [46] |
|  | *tphA3* | Bacterial consortium | [46] |
|  | *xylG* | Bacterial consortium | [46] |
|  | *aliA* | *P. citronellolis* | [46] |
|  | *pflD* | *Moorella mulderi* | [47] |
|  | *aspC* | Pyrococcus furiosus | [48] |
|  | *asr* | Pyrococcus furiosus | [48] |
|  | *ior* | Pyrococcus furiosus | [48] |
|  | *por* | Pyrococcus furiosus | [48] |
|  | *vor* | Pyrococcus furiosus | [48] |
|  | *sacB* | *Bacillus subtilis* | [49] |
|  | *rhlI* | *Pseudomonas sp* | [50] |
|  | *TmoB_BmoB* | *Pseudoxanthomonas spadix* | [51] |
|  | *PhdI* | *M. vanbaalenii PYR-1* | [52] |
|  | *phdK* | *M. vanbaalenii PYR-1* | [52] |
|  | *nidA3* | *M. vanbaalenii PYR-1* | [52] |
|  | *fadABE* | *T. aromatica strain T1* | [53] |
|  | *tut* | *Aromatoleum aromaticum EbN1* | [53] |
|  | *ebdH* | *Desulfococcus oleovorans* | [54] |
|  | *mas* | *Aromatoleum sp. HxN1* | [54] |
|  | *EbN1* | *Aromatoleum aromaticum* | [54] |
|  | *dsrA* | *Desulfobulbus propionicus* | [54] |
|  | *bamA* | *Anaerolineaceae, Dechloromonas, Geobacter* | [54] |
|  | *LadA beta* | *Pseudomonas putida KT244* | [55] |
|  | *xylE* | *P. putida* | [56] |
|  | *gntR* | *P. aeruginosa RR1* | [56] |
|  | *mgdABCD* | Binatota (uncharacterized bacterial phylum) | [56] |
|  | *otsAB* | *Rhodococcus sp.* | [57] |
|  | *treYZ* | *Rhodococcus sp.* | [57] |
|  | *PpcA* | *Aromatoleum aromaticum EbN1* | [58] |
|  | *pmo* | *Bacillus anthracis, Bacillus cereus, Achromobacter sp.* | [59] |
|  | *coxABC* | *Uncharacterized phylum* | [60] |
|  | *cydAB* | *Methanobacterium formicicum* | [60] |
|  | *crtIQPH* | Binatota (uncharacterized bacterial phylum) | [60] |
|  | *dcmA* | Binatota (uncharacterized bacterial phylum) | [60] |
|  | *hyaABC* | Binatota (uncharacterized bacterial phylum) | [60] |
|  | *mau* | Binatota (uncharacterized bacterial phylum) | [60] |
|  | *xoxFJG* | Binatota (uncharacterized bacterial phylum) | [60] |
|  | *MasD* | *Desulfosarcina sp. Bus5* | [61] |
|  | *CheY* | *Polymorphum gilvum SL003B-26A1* | [62] |
|  | *KdpDE* | *Alcanivorax borkumensis* | [62] |
|  | *nahQ (unknown gene)* | *Pseudomonas sp.* | [63] |
|  | *mhpE* | *Rhodococcus, Novosphingobium*  *Gordonia, Nocardioides* | [64] |
|  | *AmtB* | Metagenomic marine consortium | [65] |
|  | *ectA* | Metagenomic marine consortium | [65] |
|  | *gltX* | Metagenomic marine consortium | [65] |
|  | *modA* | Metagenomic marine consortium | [65] |
|  | *nqrF* | Metagenomic marine consortium | [65] |
|  | *petF* | Metagenomic marine consortium | [65] |
|  | *phoB* | Metagenomic marine consortium | [65] |
|  | *psbAP* | Metagenomic marine consortium | [65] |
|  | *TatD* | Metagenomic marine consortium | [65] |
|  | *ThuA* | Metagenomic marine consortium | [65] |
|  | *corA* | Metagenomic marine consortium | [65] |
|  | *Bct (Gmet 2054)* | *G. metallireducens* | [66] |
|  | *Gmet 0231* | *G. metallireducens* | [67] |
|  | *Gmet 0232* | *G. metallireducens* | [67] |
|  | *fhs* | *Bacterial consortium* | [68] |
|  | *hydBG* | *Thermococcus* | [68] |
|  | *mxaF* | *Thiotrichales and Methylophaga* | [68] |
|  | *cysl* | *Desulfobacteraceae* | [69] |
|  | *cytBC* | *Desulfobacteraceae* | [69] |
|  | *fmdABCDE* | *Desulfobacteraceae* | [69] |
|  | *fqo* | *Desulfobacteraceae* | [69] |
|  | *phsA* | *Desulfobacteraceae* | [69] |
|  | *Rnf* | *Desulfobacteraceae* | [69] |
|  | *TST* | *Desulfobacteraceae* | [69] |
|  | *rhB* | *Desulfobacteraceae* | [69] |
|  | *nylB* | *Syntrophobacteraceae,* | [69] |
|  | *bnsEF* | Metagenomic library | [70] |
|  | *dchABC* | *Ar. aromaticum EbN1* | [70] |
|  | *hcrABC* | *Clostridiales/ Dethiosulfatibacter* | [70] |
|  | *hnABC* | *Clostridiales/ Dethiosulfatibacter* | [70] |
|  | *bnsEFGH* | *Clostridiales/ Dethiosulfatibacter* | [70] |
|  | *badH* | *Clostridiales/ Dethiosulfatibacter* | [71] |
|  | *mcmLS* | Cyanobacteria | [72] |
|  | *sat* | Cyanobacteria | [72] |
|  | *frcB* | *Archaeoglobus fulgidus VC-16* | [72] |
|  | *codhABCDE* | *Methanosaeta* | [72] |
|  | *fwdABCDEFG* | *Methanosaeta* | [72] |
|  | *mch* | *Methanosaeta* | [72] |
|  | *mtd* | *Methanosaeta* | [72] |
|  | *limEH* | Bacterial community | [73] |

**References**

[1] F. Abbasian, R. Lockington, M. Megharaj, and R. Naidu, “A Review on the Genetics of Aliphatic and Aromatic Hydrocarbon Degradation,” *Appl Biochem Biotechnol*, vol. 178, no. 2, Art. no. 2, Jan. 2016, doi: 10.1007/s12010-015-1881-y.

[2] F. Alotaibi, M. Hijri, and M. St-Arnaud, “Overview of Approaches to Improve Rhizoremediation of Petroleum Hydrocarbon-Contaminated Soils,” *Applied Microbiology*, vol. 1, no. 2, Art. no. 2, Aug. 2021, doi: 10.3390/applmicrobiol1020023.

[3] S. Atashgahi *et al.*, “A benzene-degrading nitrate-reducing microbial consortium displays aerobic and anaerobic benzene degradation pathways,” *Sci Rep*, vol. 8, no. 1, Art. no. 1, Mar. 2018, doi: 10.1038/s41598-018-22617-x.

[4] Sakshi, S. K. Singh, and A. K. Haritash, “Bacterial degradation of mixed-PAHs and expression of PAH-catabolic genes,” *World J Microbiol Biotechnol*, vol. 39, no. 2, p. 47, Feb. 2023, doi: 10.1007/s11274-022-03489-w.

[5] B. Wang, S. Kuang, H. Shao, L. Wang, and H. Wang, “Anaerobic-petroleum degrading bacteria: Diversity and biotechnological applications for improving coastal soil,” *Ecotoxicology and Environmental Safety*, vol. 224, p. 112646, Nov. 2021, doi: 10.1016/j.ecoenv.2021.112646.

[6] M. Barbato *et al.*, “Hydrocarbonoclastic Alcanivorax Isolates Exhibit Different Physiological and Expression Responses to n-dodecane,” *Front. Microbiol.*, vol. 7, Dec. 2016, doi: 10.3389/fmicb.2016.02056.

[7] K. K. Bhatt, M. K. Lily, G. Joshi, and K. Dangwal, “Benzo(a)pyrene degradation pathway in *Bacillus subtilis* BMT4i (MTCC 9447),” *Turkish Journal of Biochemistry*, vol. 43, no. 6, Art. no. 6, Nov. 2018, doi: 10.1515/tjb-2017-0334.

[8] J. Brzeszcz and P. Kaszycki, “Aerobic bacteria degrading both n-alkanes and aromatic hydrocarbons: an undervalued strategy for metabolic diversity and flexibility,” *Biodegradation*, vol. 29, no. 4, Art. no. 4, Aug. 2018, doi: 10.1007/s10532-018-9837-x.

[9] M. Auffret, D. Labbé, G. Thouand, C. W. Greer, and F. Fayolle-Guichard, “Degradation of a Mixture of Hydrocarbons, Gasoline, and Diesel Oil Additives by *Rhodococcus aetherivorans* and *Rhodococcus wratislaviensis*,” *Appl Environ Microbiol*, vol. 75, no. 24, pp. 7774–7782, Dec. 2009, doi: 10.1128/AEM.01117-09.

[10] M. Pacwa-Płociniczak, J. Czapla, T. Płociniczak, and Z. Piotrowska-Seget, “The effect of bioaugmentation of petroleum-contaminated soil with Rhodococcus erythropolis strains on removal of petroleum from soil,” *Ecotoxicology and Environmental Safety*, vol. 169, pp. 615–622, Mar. 2019, doi: 10.1016/j.ecoenv.2018.11.081.

[11] J. Brzeszcz, T. Steliga, P. Ryszka, P. Kaszycki, and P. Kapusta, “Bacteria degrading both n-alkanes and aromatic hydrocarbons are prevalent in soils,” *Environ Sci Pollut Res*, vol. 31, no. 4, Art. no. 4, Dec. 2023, doi: 10.1007/s11356-023-31405-8.

[12] J. E. Bullows *et al.*, “Anaerobic benzene oxidation in *Geotalea daltonii* involves activation by methylation and is regulated by the transition state regulator AbrB,” *Appl Environ Microbiol*, vol. 90, no. 10, Art. no. 10, Oct. 2024, doi: 10.1128/aem.00856-24.

[13] C. Li *et al.*, “Biodegradation of petroleum hydrocarbons based pollutants in contaminated soil by exogenous effective microorganisms and indigenous microbiome,” *Ecotoxicology and Environmental Safety*, vol. 253, p. 114673, Mar. 2023, doi: 10.1016/j.ecoenv.2023.114673.

[14] C. Lu *et al.*, “A PAH-degrading bacterial community enriched with contaminated agricultural soil and its utility for microbial bioremediation,” *Environmental Pollution*, vol. 251, pp. 773–782, Aug. 2019, doi: 10.1016/j.envpol.2019.05.044.

[15] C. Zhang *et al.*, “Marine sediments harbor diverse archaea and bacteria with the potential for anaerobic hydrocarbon degradation via fumarate addition,” *FEMS Microbiology Ecology*, vol. 97, no. 5, Art. no. 5, Apr. 2021, doi: 10.1093/femsec/fiab045.

[16] A. Calderon-Fajardo, K. J. Hidalgo, E. A. V. Romao, C. P. S. Gonzales, L. F. Martins, and V. M. Oliveira, “Taxonomic and evolutionary insights from comparative genomics of hydrocarbon degrading bacteria isolated from petroleum reservoirs,” *Journal of Hazardous Materials Advances*, vol. 15, p. 100439, Aug. 2024, doi: 10.1016/j.hazadv.2024.100439.

[17] K. Juárez *et al.*, “Microaerobic degradation of crude oil and long chain alkanes by a new Rhodococcus strain from Gulf of Mexico,” *World J Microbiol Biotechnol*, vol. 39, no. 10, Art. no. 10, Oct. 2023, doi: 10.1007/s11274-023-03703-3.

[18] J. Camacho, E. Mesén-Porras, D. Rojas-Gätjens, D. Pérez-Pantoja, F. Puente-Sánchez, and M. Chavarría, “Draft genome sequence of three hydrocarbon-degrading *Pseudomonadota* strains isolated from an abandoned century-old oil exploration well,” *Microbiol Resour Announc*, vol. 13, no. 2, Art. no. 2, Feb. 2024, doi: 10.1128/mra.01076-23.

[19] D. Garrido-Sanz *et al.*, “Analysis of the biodegradative and adaptive potential of the novel polychlorinated biphenyl degrader Rhodococcus sp. WAY2 revealed by its complete genome sequence,” *Microbial Genomics*, vol. 6, no. 4, Apr. 2020, doi: 10.1099/mgen.0.000363.

[20] Y.-J. Chen *et al.*, “Arctic’s hidden hydrocarbon degradation microbes: investigating the effects of hydrocarbon contamination, biostimulation, and a surface washing agent on microbial communities and hydrocarbon biodegradation pathways in high-Arctic beaches,” *Environmental Microbiome*, vol. 19, no. 1, Art. no. 1, Oct. 2024, doi: 10.1186/s40793-024-00626-w.

[21] I. Chicca *et al.*, “Degradation of BTEX mixture by a new Pseudomonas putida strain: role of the quorum sensing in the modulation of the upper BTEX oxidative pathway,” *Environ Sci Pollut Res*, vol. 27, no. 29, Art. no. 29, Oct. 2020, doi: 10.1007/s11356-020-09650-y.

[22] E. J. Choi, H. M. Jin, S. H. Lee, R. K. Math, E. L. Madsen, and C. O. Jeon, “Comparative Genomic Analysis and Benzene, Toluene, Ethylbenzene, and *o* -, *m* -, and *p* -Xylene (BTEX) Degradation Pathways of Pseudoxanthomonas spadix BD-a59,” *Appl Environ Microbiol*, vol. 79, no. 2, Art. no. 2, Jan. 2013, doi: 10.1128/AEM.02809-12.

[23] G. Corti Monzón, M. Nisenbaum, M. K. Herrera Seitz, and S. E. Murialdo, “New Findings on Aromatic Compounds’ Degradation and Their Metabolic Pathways, the Biosurfactant Production and Motility of the Halophilic Bacterium Halomonas sp. KHS3,” *Curr Microbiol*, vol. 75, no. 8, Art. no. 8, Aug. 2018, doi: 10.1007/s00284-018-1497-x.

[24] J. M. DeBruyn, C. S. Chewning, and G. S. Sayler, “Comparative Quantitative Prevalence of *Mycobacteria* and Functionally Abundant *nidA* , *nahAc* , and *nagAc* Dioxygenase Genes in Coal Tar Contaminated Sediments,” *Environ. Sci. Technol.*, vol. 41, no. 15, Art. no. 15, Aug. 2007, doi: 10.1021/es070406c.

[25] N. Dombrowski, J. A. Donaho, T. Gutierrez, K. W. Seitz, A. P. Teske, and B. J. Baker, “Reconstructing metabolic pathways of hydrocarbon-degrading bacteria from the Deepwater Horizon oil spill,” *Nat Microbiol*, vol. 1, no. 7, Art. no. 7, May 2016, doi: 10.1038/nmicrobiol.2016.57.

[26] P. G. Egland, D. A. Pelletier, M. Dispensa, J. Gibson, and C. S. Harwood, “A cluster of bacterial genes for anaerobic benzene ring biodegradation,” *Proc. Natl. Acad. Sci. U.S.A.*, vol. 94, no. 12, pp. 6484–6489, Jun. 1997, doi: 10.1073/pnas.94.12.6484.

[27] C. B. Ehis-Eriakha, C. B. Chikere, and O. Akaranta, “Functional Gene Diversity of Selected Indigenous Hydrocarbon-Degrading Bacteria in Aged Crude Oil,” *International Journal of Microbiology*, vol. 2020, pp. 1–11, Jul. 2020, doi: 10.1155/2020/2141209.

[28] A. M. Elyamine, J. Kan, S. Meng, P. Tao, H. Wang, and Z. Hu, “Aerobic and Anaerobic Bacterial and Fungal Degradation of Pyrene: Mechanism Pathway Including Biochemical Reaction and Catabolic Genes,” *IJMS*, vol. 22, no. 15, Art. no. 15, Jul. 2021, doi: 10.3390/ijms22158202.

[29] B. Entsch, Y. Nan, K. Weaich, and K. F. Scott, “Sequence and organization of pobA, the gene coding for p-hydroxybenzoate hydroxylase, an inducible enzyme from Pseudomonas aeruginosa,” *Gene*, vol. 71, no. 2, Art. no. 2, Nov. 1988, doi: 10.1016/0378-1119(88)90044-3.

[30] O. Erbilgin, K. L. McDonald, and C. A. Kerfeld, “Characterization of a Planctomycetal Organelle: a Novel Bacterial Microcompartment for the Aerobic Degradation of Plant Saccharides,” *Appl Environ Microbiol*, vol. 80, no. 7, Art. no. 7, Apr. 2014, doi: 10.1128/AEM.03887-13.

[31] S. Eskandari *et al.*, “Bioremediation of Polycyclic Aromatic Hydrocarbons by Bacillus Licheniformis ATHE9 and Bacillus Mojavensis ATHE13 as Newly Strains Isolated from Oil-Contaminated Soil,” *JGEESI*, vol. 11, no. 2, Art. no. 2, Jan. 2017, doi: 10.9734/JGEESI/2017/35447.

[32] M. O. Eze, G. C. Hose, S. C. George, and R. Daniel, “Diversity and metagenome analysis of a hydrocarbon-degrading bacterial consortium from asphalt lakes located in Wietze, Germany,” *AMB Expr*, vol. 11, no. 1, Art. no. 1, Dec. 2021, doi: 10.1186/s13568-021-01250-4.

[33] M. O. Eze, “Metagenome Analysis of a Hydrocarbon-Degrading Bacterial Consortium Reveals the Specific Roles of BTEX Biodegraders,” *Genes*, vol. 12, no. 1, Art. no. 1, Jan. 2021, doi: 10.3390/genes12010098.

[34] M. R. Fries, J. Zhou, J. Chee-Sanford, and J. M. Tiedje, “Isolation, characterization, and distribution of denitrifying toluene degraders from a variety of habitats,” *Appl Environ Microbiol*, vol. 60, no. 8, Art. no. 8, Aug. 1994, doi: 10.1128/aem.60.8.2802-2810.1994.

[35] H. Futamata, S. Harayama, and K. Watanabe, “Group-Specific Monitoring of Phenol Hydroxylase Genes for a Functional Assessment of Phenol-Stimulated Trichloroethylene Bioremediation,” *Appl Environ Microbiol*, vol. 67, no. 10, Art. no. 10, Oct. 2001, doi: 10.1128/AEM.67.10.4671-4677.2001.

[36] I. Gg and S. Oh, “Role of Plasmid-Borne Genes in the Biodegradation of Polycyclic Aromatic Hydrocarbons (PAHs) by Consortium of Aerobic Heterotrophic Bacteria,” *J Pet Environ Biotechnol*, vol. 07, no. 01, Art. no. 01, 2016, doi: 10.4172/2157-7463.1000264.

[37] E. Góngora, A.-O. Lirette, N. J. Freyria, C. W. Greer, and L. G. Whyte, “Metagenomic survey reveals hydrocarbon biodegradation potential of Canadian high Arctic beaches,” *Environmental Microbiome*, vol. 19, no. 1, Art. no. 1, Sep. 2024, doi: 10.1186/s40793-024-00616-y.

[38] H. Habe and T. Omori, “Genetics of Polycyclic Aromatic Hydrocarbon Metabolism in Diverse Aerobic Bacteria,” *Bioscience, Biotechnology, and Biochemistry*, vol. 67, no. 2, Art. no. 2, Jan. 2003, doi: 10.1271/bbb.67.225.

[39] K. M. Handley *et al.*, “Metabolic and spatio-taxonomic response of uncultivated seafloor bacteria following the Deepwater Horizon oil spill,” *The ISME Journal*, vol. 11, no. 11, Art. no. 11, Nov. 2017, doi: 10.1038/ismej.2017.110.

[40] E. M. Hearn, D. R. Patel, and B. Van Den Berg, “Outer-membrane transport of aromatic hydrocarbons as a first step in biodegradation,” *Proc. Natl. Acad. Sci. U.S.A.*, vol. 105, no. 25, Art. no. 25, Jun. 2008, doi: 10.1073/pnas.0801264105.

[41] B. P. Hedlund, A. D. Geiselbrecht, T. J. Bair, and J. T. Staley, “Polycyclic Aromatic Hydrocarbon Degradation by a New Marine Bacterium, *Neptunomonas naphthovorans* gen. nov., sp. nov,” *Appl Environ Microbiol*, vol. 65, no. 1, Art. no. 1, Jan. 1999, doi: 10.1128/AEM.65.1.251-259.1999.

[42] J. Heider, A. M. Spormann, H. R. Beller, and F. Widdel, “Anaerobic bacterial metabolism of hydrocarbons,” *FEMS Microbiol Rev*, vol. 22, no. 5, Art. no. 5, Dec. 1998, doi: 10.1111/j.1574-6976.1998.tb00381.x.

[43] A. E.-L. Hesham, A. M. M. Mawad, Y. M. Mostafa, and A. Shoreit, “Biodegradation Ability and Catabolic Genes of Petroleum-Degrading *Sphingomonas koreensis* Strain ASU-06 Isolated from Egyptian Oily Soil,” *BioMed Research International*, vol. 2014, pp. 1–10, 2014, doi: 10.1155/2014/127674.

[44] K. J. Hidalgo, I. N. Sierra-Garcia, B. M. Dellagnezze, and V. M. De Oliveira, “Metagenomic Insights Into the Mechanisms for Biodegradation of Polycyclic Aromatic Hydrocarbons in the Oil Supply Chain,” *Front. Microbiol.*, vol. 11, p. 561506, Sep. 2020, doi: 10.3389/fmicb.2020.561506.

[45] D. E. Holmes, C. Risso, J. A. Smith, and D. R. Lovley, “Anaerobic Oxidation of Benzene by the Hyperthermophilic Archaeon Ferroglobus placidus,” *Appl Environ Microbiol*, vol. 77, no. 17, Art. no. 17, Sep. 2011, doi: 10.1128/AEM.05452-11.

[46] M. S. Hossain, B. Iken, and R. Iyer, “Whole genome analysis of 26 bacterial strains reveals aromatic and hydrocarbon degrading enzymes from diverse environmental soil samples,” *Sci Rep*, vol. 14, no. 1, Art. no. 1, Dec. 2024, doi: 10.1038/s41598-024-78564-3.

[47] J. Liu *et al.*, “Proliferation of hydrocarbon-degrading microbes at the bottom of the Mariana Trench,” *Microbiome*, vol. 7, no. 1, Art. no. 1, Dec. 2019, doi: 10.1186/s40168-019-0652-3.

[48] J.-W. Zhang *et al.*, “Newly discovered Asgard archaea Hermodarchaeota potentially degrade alkanes and aromatics via alkyl/benzyl-succinate synthase and benzoyl-CoA pathway,” *The ISME Journal*, vol. 15, no. 6, Art. no. 6, Jun. 2021, doi: 10.1038/s41396-020-00890-x.

[49] W. Jäger, A. Schäfer, A. Pühler, G. Labes, and W. Wohlleben, “Expression of the Bacillus subtilis sacB gene leads to sucrose sensitivity in the gram-positive bacterium Corynebacterium glutamicum but not in Streptomyces lividans,” *J Bacteriol*, vol. 174, no. 16, Art. no. 16, Aug. 1992, doi: 10.1128/jb.174.16.5462-5465.1992.

[50] R. A. Palomino Huarcaya, C. Castillo-Vilcahuaman, S. B. Martel-Torres, F. A. Merino Rafael, and S. M. Gutiérrez Moreno, “Comparative Genomics of Genes for rhamnolipid synthesis and monoaromatic hydrocarbon tolerance in environmental strains of Pseudomonas aeruginosa,” *F1000Res*, vol. 13, p. 1519, Dec. 2024, doi: 10.12688/f1000research.158761.1.

[51] V. Khot *et al.*, “CANT-HYD: A Curated Database of Phylogeny-Derived Hidden Markov Models for Annotation of Marker Genes Involved in Hydrocarbon Degradation,” *Front. Microbiol.*, vol. 12, p. 764058, Jan. 2022, doi: 10.3389/fmicb.2021.764058.

[52] S.-J. Kim, O. Kweon, R. C. Jones, J. P. Freeman, R. D. Edmondson, and C. E. Cerniglia, “Complete and Integrated Pyrene Degradation Pathway in *Mycobacterium vanbaalenii* PYR-1 Based on Systems Biology,” *J Bacteriol*, vol. 189, no. 2, Art. no. 2, Jan. 2007, doi: 10.1128/JB.01310-06.

[53] S. Kühner *et al.*, “Substrate-Dependent Regulation of Anaerobic Degradation Pathways for Toluene and Ethylbenzene in a Denitrifying Bacterium, Strain EbN1,” *J Bacteriol*, vol. 187, no. 4, Art. no. 4, Feb. 2005, doi: 10.1128/JB.187.4.1493-1503.2005.

[54] K. Laczi *et al.*, “New Frontiers of Anaerobic Hydrocarbon Biodegradation in the Multi-Omics Era,” *Front. Microbiol.*, vol. 11, p. 590049, Nov. 2020, doi: 10.3389/fmicb.2020.590049.

[55] M. Wang, M. Ding, and Y. Yuan, “Bioengineering for the Microbial Degradation of Petroleum Hydrocarbon Contaminants,” *Bioengineering*, vol. 10, no. 3, Art. no. 3, Mar. 2023, doi: 10.3390/bioengineering10030347.

[56] M. M. Marín, L. Yuste, and F. Rojo, “Differential Expression of the Components of the Two Alkane Hydroxylases from *Pseudomonas aeruginosa*,” *J Bacteriol*, vol. 185, no. 10, Art. no. 10, May 2003, doi: 10.1128/JB.185.10.3232-3237.2003.

[57] Yu. A. Markova, I. S. Petrushin, and L. A. Belovezhets, “Detection of gene clusters for biodegradation of alkanes and aromatic compounds in the Rhodococcus qingshengii VKM Ac-2784D genome,” *Vestn. VOGiS*, vol. 27, no. 3, Art. no. 3, Jun. 2023, doi: 10.18699/VJGB-23-33.

[58] R. U. Meckenstock *et al.*, “Anaerobic Degradation of Benzene and Polycyclic Aromatic Hydrocarbons,” *Microb Physiol*, vol. 26, no. 1–3, Art. no. 1–3, 2016, doi: 10.1159/000441358.

[59] S. A. Mohammed, T. J. Omar Zrary, and A. H. Hasan, “Degradation of crude oil and the pure hydrocarbon fractions by indigenous soil microorganisms,” *Biologia*, vol. 78, no. 12, Art. no. 12, Sep. 2023, doi: 10.1007/s11756-023-01513-4.

[60] C. L. Murphy *et al.*, “Genomic Analysis of the Yet-Uncultured Binatota Reveals Broad Methylotrophic, Alkane-Degradation, and Pigment Production Capacities,” *mBio*, vol. 12, no. 3, Art. no. 3, Jun. 2021, doi: 10.1128/mBio.00985-21.

[61] F. Musat, “The anaerobic degradation of gaseous, nonmethane alkanes — From in situ processes to microorganisms,” *Computational and Structural Biotechnology Journal*, vol. 13, pp. 222–228, 2015, doi: 10.1016/j.csbj.2015.03.002.

[62] Y. Nie, Y.-Q. Tang, Y. Li, C.-Q. Chi, M. Cai, and X.-L. Wu, “The Genome Sequence of Polymorphum gilvum SL003B-26A1T Reveals Its Genetic Basis for Crude Oil Degradation and Adaptation to the Saline Soil,” *PLoS ONE*, vol. 7, no. 2, Art. no. 2, Feb. 2012, doi: 10.1371/journal.pone.0031261.

[63] R.-H. Peng *et al.*, “Microbial biodegradation of polyaromatic hydrocarbons,” *FEMS Microbiol Rev*, vol. 32, no. 6, Art. no. 6, Nov. 2008, doi: 10.1111/j.1574-6976.2008.00127.x.

[64] F. F. Rochman *et al.*, “Benzene and Naphthalene Degrading Bacterial Communities in an Oil Sands Tailings Pond,” *Front. Microbiol.*, vol. 8, p. 1845, Sep. 2017, doi: 10.3389/fmicb.2017.01845.

[65] B. Song *et al.*, “Functional metagenomic and enrichment metatranscriptomic analysis of marine microbial activities within a marine oil spill area,” *Environmental Pollution*, vol. 274, p. 116555, Apr. 2021, doi: 10.1016/j.envpol.2021.116555.

[66] T. Zhang, P.-L. Tremblay, A. K. Chaurasia, J. A. Smith, T. S. Bain, and D. R. Lovley, “Anaerobic Benzene Oxidation via Phenol in Geobacter metallireducens,” *Appl Environ Microbiol*, vol. 79, no. 24, pp. 7800–7806, Dec. 2013, doi: 10.1128/AEM.03134-13.

[67] T. Zhang, P.-L. Tremblay, A. K. Chaurasia, J. A. Smith, T. S. Bain, and D. R. Lovley, “Identification of genes specifically required for the anaerobic metabolism of benzene in Geobacter metallireducens,” *Front. Microbiol.*, vol. 5, May 2014, doi: 10.3389/fmicb.2014.00245.

[68] A. Vigneron, E. B. Alsop, B. P. Lomans, N. C. Kyrpides, I. M. Head, and N. Tsesmetzis, “Succession in the petroleum reservoir microbiome through an oil field production lifecycle,” *The ISME Journal*, vol. 11, no. 9, Art. no. 9, Sep. 2017, doi: 10.1038/ismej.2017.78.

[69] A. Vigneron *et al.*, “Contrasting Pathways for Anaerobic Methane Oxidation in Gulf of Mexico Cold Seep Sediments,” *mSystems*, vol. 4, no. 1, Art. no. 1, Feb. 2019, doi: 10.1128/msystems.00091-18.

[70] A. Vigneron, P. Cruaud, F. Ducellier, I. M. Head, and N. Tsesmetzis, “Syntrophic Hydrocarbon Degradation in a Decommissioned Off-Shore Subsea Oil Storage Structure,” *Microorganisms*, vol. 9, no. 2, Art. no. 2, Feb. 2021, doi: 10.3390/microorganisms9020356.

[71] A. Vigneron, P. Cruaud, C. Lovejoy, and W. F. Vincent, “Genomic insights into cryptic cycles of microbial hydrocarbon production and degradation in contiguous freshwater and marine microbiomes,” *Microbiome*, vol. 11, no. 1, Art. no. 1, May 2023, doi: 10.1186/s40168-023-01537-7.

[72] Y.-F. Liu *et al.*, “Metabolic capability and in situ activity of microorganisms in an oil reservoir,” *Microbiome*, vol. 6, no. 1, Art. no. 1, Dec. 2018, doi: 10.1186/s40168-017-0392-1.

[73] Z. Lu *et al.*, “Microbial gene functions enriched in the Deepwater Horizon deep-sea oil plume,” *The ISME Journal*, vol. 6, no. 2, pp. 451–460, Feb. 2012, doi: 10.1038/ismej.2011.91.
