# Supplementary material for: Whole Genome of Petroleum Hydrocarbon Degrading Rhodococcus indonesiensis isolated from Nacharam, Hyderabad, India
Source: Research Square preprint supplement (doi:10.21203/rs.3.rs-6309542/v1), 2025-09-26
Supplement: Supplementary file 6 [file 4dbeb897dafba524c38bb612.docx]

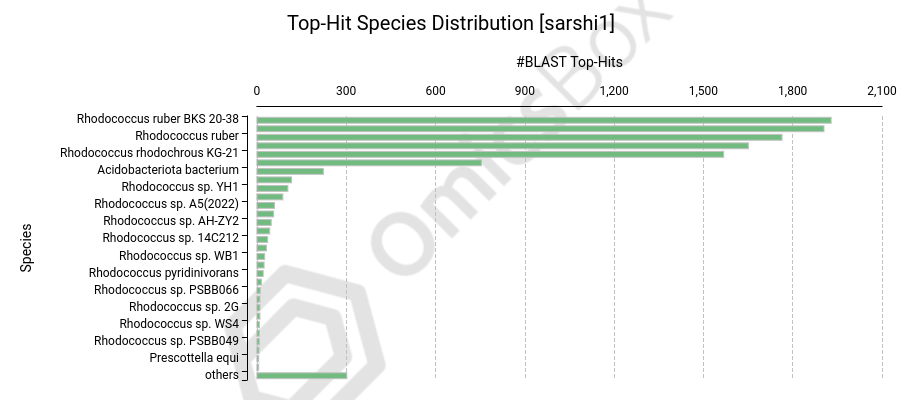


**Fig. 1 Blast2go_ Species Distribution**


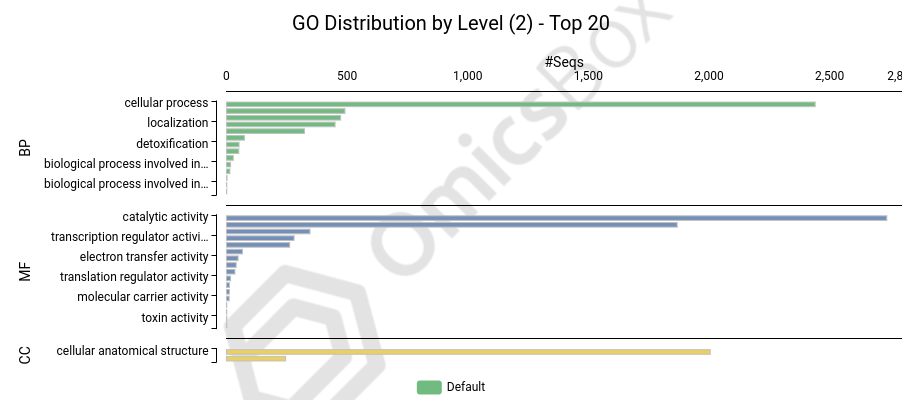


**Fig. 2 GO distribution of SARSHI1**


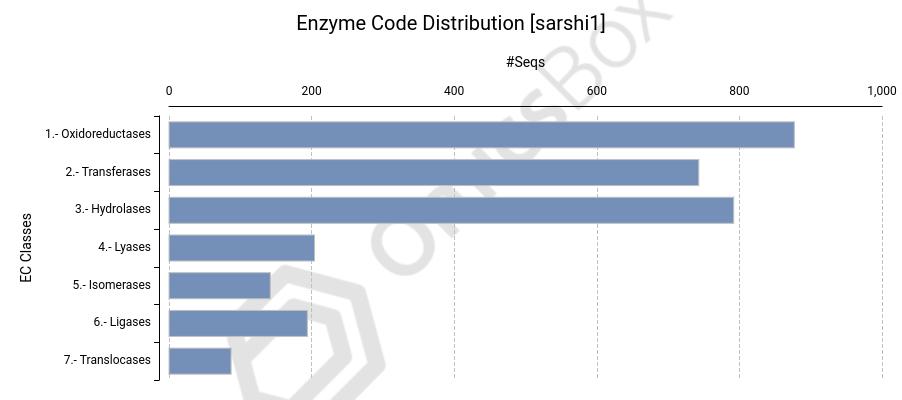


**Fig. 3 Enzyme Distribution of SARSHI1**
