# Supplementary material for: Whole Genome of Petroleum Hydrocarbon Degrading Rhodococcus indonesiensis isolated from Nacharam, Hyderabad, India
Source: Research Square preprint supplement (doi:10.21203/rs.3.rs-6309542/v1), 2025-09-26
Supplement: Supplementary file 7 [file 53a6c88ff04f61d3a70cc7ca.xlsx]

## Sheet: Sheet1
query	seed_ortholog	evalue	score	eggNOG_OGs	max_annot_lvl	COG_category	Description	Preferred_name	GOs	EC	KEGG_ko	KEGG_Pathway	KEGG_Module	KEGG_Reaction	KEGG_rclass	BRITE	KEGG_TC	CAZy	BiGG_Reaction	PFAMs
ENBDON_00001	1240349.ANGC01000019_gene919	0.0	978.0	COG0593@1|root,COG0593@2|Bacteria,2GJKI@201174|Actinobacteria,4FXEB@85025|Nocardiaceae	201174|Actinobacteria	L	it binds specifically double-stranded DNA at a 9 bp consensus (dnaA box) 5'-TTATC CA A CA A-3'. DnaA binds to ATP and to acidic phospholipids	dnaA	GO:0000166,GO:0003674,GO:0003676,GO:0003677,GO:0003688,GO:0003690,GO:0003824,GO:0005488,GO:0005524,GO:0005575,GO:0005618,GO:0005622,GO:0005623,GO:0005737,GO:0005886,GO:0006139,GO:0006163,GO:0006164,GO:0006172,GO:0006259,GO:0006260,GO:0006261,GO:0006270,GO:0006725,GO:0006753,GO:0006793,GO:0006796,GO:0006807,GO:0008144,GO:0008150,GO:0008152,GO:0009058,GO:0009059,GO:0009117,GO:0009123,GO:0009124,GO:…	-	ko:K02313	ko02020,ko04112,map02020,map04112	-	-	-	ko00000,ko00001,ko03032,ko03036	-	-	-	Bac_DnaA,Bac_DnaA_C
ENBDON_00002	1429046.RR21198_2780	3.93e-254	700.0	COG0592@1|root,COG0592@2|Bacteria,2GJK3@201174|Actinobacteria,4FVBY@85025|Nocardiaceae	201174|Actinobacteria	L	Confers DNA tethering and processivity to DNA polymerases and other proteins. Acts as a clamp, forming a ring around DNA (a reaction catalyzed by the clamp-loading complex) which diffuses in an ATP-independent manner freely and bidirectionally along dsDNA. Initially characterized for its ability to contact the catalytic subunit of DNA polymerase III (Pol III), a complex, multichain enzyme respons…	dnaN	GO:0005575,GO:0005576,GO:0005618,GO:0005623,GO:0030312,GO:0044464,GO:0071944	2.7.7.7	ko:K02338	ko00230,ko00240,ko01100,ko03030,ko03430,ko03440,map00230,map00240,map01100,map03030,map03430,map03440	M00260	R00375,R00376,R00377,R00378	RC02795	ko00000,ko00001,ko00002,ko01000,ko03032,ko03400	-	-	-	DNA_pol3_beta,DNA_pol3_beta_2,DNA_pol3_beta_3
ENBDON_00003	1429046.RR21198_2779	7.8e-282	772.0	COG1195@1|root,COG1195@2|Bacteria,2GJCS@201174|Actinobacteria,4FWDF@85025|Nocardiaceae	201174|Actinobacteria	L	it is required for DNA replication and normal SOS inducibility. RecF binds preferentially to single-stranded, linear DNA. It also seems to bind ATP	recF	GO:0000731,GO:0005575,GO:0005622,GO:0005623,GO:0005737,GO:0005829,GO:0005886,GO:0006139,GO:0006259,GO:0006281,GO:0006302,GO:0006725,GO:0006807,GO:0006950,GO:0006974,GO:0008150,GO:0008152,GO:0009058,GO:0009059,GO:0009987,GO:0016020,GO:0018130,GO:0019438,GO:0033554,GO:0034641,GO:0034645,GO:0034654,GO:0043170,GO:0044237,GO:0044238,GO:0044249,GO:0044260,GO:0044271,GO:0044424,GO:0044444,GO:0044464,GO:…	-	ko:K03629	ko03440,map03440	-	-	-	ko00000,ko00001,ko03400	-	-	-	SMC_N
ENBDON_00004	1240349.ANGC01000019_gene916	1.18e-122	350.0	COG5512@1|root,COG5512@2|Bacteria,2GNQ4@201174|Actinobacteria,4FUXM@85025|Nocardiaceae	201174|Actinobacteria	S	Belongs to the UPF0232 family	-	-	-	-	-	-	-	-	-	-	-	-	DUF721
ENBDON_00005	1240349.ANGC01000019_gene915	1.26e-210	582.0	COG3687@1|root,COG3687@2|Bacteria,2H3JA@201174|Actinobacteria,4G8IN@85025|Nocardiaceae	201174|Actinobacteria	S	Predicted metal-dependent hydrolase	-	-	-	ko:K07044	-	-	-	-	ko00000	-	-	-	Metal_hydrol
ENBDON_00006	1240349.ANGC01000019_gene914	2.61e-259	711.0	COG1018@1|root,COG1018@2|Bacteria,2GJCV@201174|Actinobacteria,4FUD3@85025|Nocardiaceae	201174|Actinobacteria	C	2Fe-2S iron-sulfur cluster binding domain	-	-	1.1.1.404,1.14.13.238	ko:K21607,ko:K22343	ko00361,ko01100,ko01120,map00361,map01100,map01120	-	R11585	-	ko00000,ko00001,ko01000	-	-	-	FAD_binding_6,Fer2,NAD_binding_1
ENBDON_00007	1240349.ANGC01000019_gene913	4.58e-215	593.0	COG0596@1|root,COG0596@2|Bacteria,2I2Q3@201174|Actinobacteria,4FVBX@85025|Nocardiaceae	201174|Actinobacteria	IQ	Serine aminopeptidase, S33	-	-	-	-	-	-	-	-	-	-	-	-	Abhydrolase_1,adh_short
ENBDON_00008	1240349.ANGC01000019_gene912	0.0	1303.0	COG0187@1|root,COG0187@2|Bacteria,2GKGP@201174|Actinobacteria,4FUT4@85025|Nocardiaceae	201174|Actinobacteria	L	A type II topoisomerase that negatively supercoils closed circular double-stranded (ds) DNA in an ATP-dependent manner to modulate DNA topology and maintain chromosomes in an underwound state. Negative supercoiling favors strand separation, and DNA replication, transcription, recombination and repair, all of which involve strand separation. Also able to catalyze the interconversion of other topol…	gyrB	GO:0003674,GO:0003824,GO:0003916,GO:0003918,GO:0005575,GO:0006139,GO:0006259,GO:0006265,GO:0006725,GO:0006807,GO:0006996,GO:0007059,GO:0008094,GO:0008150,GO:0008152,GO:0009295,GO:0009987,GO:0016043,GO:0016462,GO:0016787,GO:0016817,GO:0016818,GO:0016853,GO:0016887,GO:0017111,GO:0034335,GO:0034641,GO:0042623,GO:0043170,GO:0044237,GO:0044238,GO:0044260,GO:0046483,GO:0051276,GO:0061505,GO:0071103,GO:…	5.99.1.3	ko:K02470	-	-	-	-	ko00000,ko01000,ko03032,ko03400	-	-	-	DNA_gyraseB,DNA_gyraseB_C,HATPase_c,Toprim
ENBDON_00009	1429046.RR21198_2772	4.34e-90	264.0	COG2018@1|root,COG2018@2|Bacteria,2IFB7@201174|Actinobacteria,4G0KW@85025|Nocardiaceae	201174|Actinobacteria	S	Roadblock/LC7 domain	-	-	-	ko:K07131	-	-	-	-	ko00000	-	-	-	Robl_LC7
ENBDON_00010	1240349.ANGC01000019_gene909	2.34e-76	228.0	COG1846@1|root,COG1846@2|Bacteria,2GQ8U@201174|Actinobacteria,4G1DZ@85025|Nocardiaceae	201174|Actinobacteria	K	Protein of unknown function (DUF742)	-	-	-	-	-	-	-	-	-	-	-	-	DUF742
ENBDON_00011	1429046.RR21198_2770	8.19e-134	379.0	COG2229@1|root,COG2229@2|Bacteria,2GJIT@201174|Actinobacteria,4FX30@85025|Nocardiaceae	201174|Actinobacteria	S	Conserved hypothetical ATP binding protein	-	-	-	ko:K06945	-	-	-	-	ko00000	-	-	-	ATP_bind_1
ENBDON_00012	1240349.ANGC01000019_gene907	1.45e-175	492.0	COG3300@1|root,COG3300@2|Bacteria,2GMG6@201174|Actinobacteria,4FZ1B@85025|Nocardiaceae	201174|Actinobacteria	T	PFAM MHYT domain protein	-	-	-	-	-	-	-	-	-	-	-	-	MHYT
ENBDON_00013	1240349.ANGC01000019_gene906	5.65e-177	494.0	COG3300@1|root,COG3300@2|Bacteria,2GMG6@201174|Actinobacteria,4FVBD@85025|Nocardiaceae	201174|Actinobacteria	T	Bacterial signalling protein N terminal repeat	-	-	-	-	-	-	-	-	-	-	-	-	MHYT
ENBDON_00014	1240349.ANGC01000019_gene905	0.0	2429.0	COG0188@1|root,COG0188@2|Bacteria,2GJ2Q@201174|Actinobacteria,4FVCV@85025|Nocardiaceae	201174|Actinobacteria	L	A type II topoisomerase that negatively supercoils closed circular double-stranded (ds) DNA in an ATP-dependent manner to modulate DNA topology and maintain chromosomes in an underwound state. Negative supercoiling favors strand separation, and DNA replication, transcription, recombination and repair, all of which involve strand separation. Also able to catalyze the interconversion of other topol…	gyrA	GO:0000166,GO:0000287,GO:0003674,GO:0003824,GO:0003916,GO:0003918,GO:0005488,GO:0005524,GO:0005575,GO:0005618,GO:0005623,GO:0005886,GO:0006139,GO:0006259,GO:0006265,GO:0006725,GO:0006807,GO:0006996,GO:0008094,GO:0008144,GO:0008150,GO:0008152,GO:0009987,GO:0016020,GO:0016043,GO:0016462,GO:0016787,GO:0016817,GO:0016818,GO:0016853,GO:0016887,GO:0017076,GO:0017111,GO:0030312,GO:0030554,GO:0032553,GO:…	5.99.1.3	ko:K02469	-	-	-	-	ko00000,ko01000,ko03032,ko03400	-	-	-	DNA_gyraseA_C,DNA_topoisoIV,Intein_splicing,LAGLIDADG_3
ENBDON_00015	1240349.ANGC01000019_gene904	1.04e-131	384.0	COG3266@1|root,COG3266@2|Bacteria,2GKZP@201174|Actinobacteria,4FVMW@85025|Nocardiaceae	201174|Actinobacteria	S	Transmembrane domain of unknown function (DUF3566)	-	GO:0005575,GO:0005618,GO:0005623,GO:0005886,GO:0005887,GO:0016020,GO:0016021,GO:0030312,GO:0031224,GO:0031226,GO:0044425,GO:0044459,GO:0044464,GO:0071944	-	-	-	-	-	-	-	-	-	-	DUF3566
ENBDON_00019	1240349.ANGC01000077_gene4859	2.5e-88	261.0	COG1846@1|root,COG1846@2|Bacteria,2II35@201174|Actinobacteria,4G1C1@85025|Nocardiaceae	201174|Actinobacteria	K	helix_turn_helix multiple antibiotic resistance protein	-	-	-	-	-	-	-	-	-	-	-	-	MarR_2
ENBDON_00020	1240349.ANGC01000077_gene4858	3.59e-141	399.0	COG0693@1|root,COG0693@2|Bacteria,2GM15@201174|Actinobacteria,4FZNG@85025|Nocardiaceae	201174|Actinobacteria	S	DJ-1/PfpI family	-	-	-	-	-	-	-	-	-	-	-	-	DJ-1_PfpI
ENBDON_00021	1240349.ANGC01000077_gene4857	3.26e-94	277.0	2AUI2@1|root,31K6K@2|Bacteria,2IF7F@201174|Actinobacteria,4G1CX@85025|Nocardiaceae	201174|Actinobacteria	-	-	-	-	-	-	-	-	-	-	-	-	-	-	-
ENBDON_00022	1429046.RR21198_2758	6.41e-107	309.0	COG2847@1|root,COG2847@2|Bacteria,2IR3D@201174|Actinobacteria,4G0Y1@85025|Nocardiaceae	201174|Actinobacteria	S	Copper chaperone PCu(A)C	-	-	-	ko:K09796	-	-	-	-	ko00000,ko03110	-	-	-	PCuAC
ENBDON_00023	1429046.RR21198_2757	1.14e-276	757.0	COG2837@1|root,COG2837@2|Bacteria,2GIUB@201174|Actinobacteria,4FTVN@85025|Nocardiaceae	201174|Actinobacteria	P	Dyp-type peroxidase family	-	-	1.11.1.19	ko:K15733	-	-	-	-	ko00000,ko01000	-	-	-	Dyp_perox
ENBDON_00024	1240349.ANGC01000077_gene4854	5.27e-235	645.0	COG0208@1|root,COG0208@2|Bacteria,2GK48@201174|Actinobacteria,4FY6Z@85025|Nocardiaceae	201174|Actinobacteria	F	ribonucleotide reductase	-	-	1.17.4.1	ko:K00526	ko00230,ko00240,ko01100,map00230,map00240,map01100	M00053	R02017,R02018,R02019,R02024	RC00613	ko00000,ko00001,ko00002,ko01000,ko03400	-	-	-	Ribonuc_red_sm
ENBDON_00025	1240349.ANGC01000077_gene4853	3.9e-240	665.0	COG0443@1|root,COG0443@2|Bacteria,2H76J@201174|Actinobacteria,4FVIT@85025|Nocardiaceae	201174|Actinobacteria	O	Heat shock 70 kDa protein	-	-	-	-	-	-	-	-	-	-	-	-	-
ENBDON_00026	1240349.ANGC01000077_gene4852	5.32e-143	405.0	29VND@1|root,30H5P@2|Bacteria,2ICBQ@201174|Actinobacteria,4FYY2@85025|Nocardiaceae	201174|Actinobacteria	-	-	-	-	-	-	-	-	-	-	-	-	-	-	-
ENBDON_00027	1240349.ANGC01000077_gene4851	3.48e-303	827.0	COG2267@1|root,COG2267@2|Bacteria,2I2FE@201174|Actinobacteria,4FVI8@85025|Nocardiaceae	201174|Actinobacteria	I	Secretory lipase	-	-	3.1.1.3	ko:K01046	ko00561,ko01100,map00561,map01100	M00098	R02250,R02687	RC00020,RC00037,RC00041,RC00094	ko00000,ko00001,ko00002,ko01000	-	-	-	LIP
ENBDON_00028	1429046.RR21198_2751	0.0	1128.0	COG1960@1|root,COG1960@2|Bacteria,2GKK9@201174|Actinobacteria,4FWU4@85025|Nocardiaceae	201174|Actinobacteria	I	Acyl-CoA dehydrogenase, middle domain	fadE10	GO:0005575,GO:0005618,GO:0005622,GO:0005623,GO:0005737,GO:0005829,GO:0005886,GO:0016020,GO:0030312,GO:0044424,GO:0044444,GO:0044464,GO:0071944	-	-	-	-	-	-	-	-	-	-	Acyl-CoA_dh_1,Acyl-CoA_dh_M,Acyl-CoA_dh_N,DUF1974
ENBDON_00031	1240349.ANGC01000077_gene4848	6.13e-110	316.0	COG0652@1|root,COG0652@2|Bacteria,2IFUE@201174|Actinobacteria,4FYMW@85025|Nocardiaceae	201174|Actinobacteria	O	PPIases accelerate the folding of proteins. It catalyzes the cis-trans isomerization of proline imidic peptide bonds in oligopeptides	ppiA	GO:0000413,GO:0003674,GO:0003755,GO:0003824,GO:0005575,GO:0005576,GO:0005618,GO:0005622,GO:0005623,GO:0005737,GO:0005829,GO:0005886,GO:0006464,GO:0006807,GO:0008150,GO:0008152,GO:0009987,GO:0010035,GO:0010038,GO:0010039,GO:0016020,GO:0016853,GO:0016859,GO:0018193,GO:0018208,GO:0019538,GO:0030312,GO:0036211,GO:0042221,GO:0043170,GO:0043412,GO:0044237,GO:0044238,GO:0044260,GO:0044267,GO:0044424,GO:…	5.2.1.8	ko:K03767,ko:K03768	ko01503,ko04217,map01503,map04217	-	-	-	ko00000,ko00001,ko01000,ko03110,ko04147	-	-	-	Pro_isomerase
ENBDON_00032	1429046.RR21198_2747	9.56e-196	545.0	COG0705@1|root,COG0705@2|Bacteria,2GJYG@201174|Actinobacteria,4FUQC@85025|Nocardiaceae	201174|Actinobacteria	S	Rhomboid family	-	-	-	-	-	-	-	-	-	-	-	-	Rhomboid
ENBDON_00033	1240349.ANGC01000077_gene4846	1.91e-92	271.0	2ESQF@1|root,33K8W@2|Bacteria,2GRJ0@201174|Actinobacteria,4G2YV@85025|Nocardiaceae	201174|Actinobacteria	S	Bacterial PH domain	-	-	-	-	-	-	-	-	-	-	-	-	bPH_6
ENBDON_00034	1240349.ANGC01000077_gene4845	4.17e-55	172.0	2E4NY@1|root,32ZHR@2|Bacteria,2GQPW@201174|Actinobacteria,4G29F@85025|Nocardiaceae	201174|Actinobacteria	D	Involved in cell division	crgA	-	-	-	-	-	-	-	-	-	-	-	CrgA
ENBDON_00035	1240349.ANGC01000021_gene3478	1.66e-158	446.0	COG3879@1|root,COG3879@2|Bacteria,2GJ9Y@201174|Actinobacteria,4FX20@85025|Nocardiaceae	201174|Actinobacteria	S	Bacterial protein of unknown function (DUF881)	-	-	-	-	-	-	-	-	-	-	-	-	DUF881
ENBDON_00036	1240349.ANGC01000021_gene3479	1.11e-156	439.0	COG0512@1|root,COG0512@2|Bacteria,2GJUX@201174|Actinobacteria,4FV6U@85025|Nocardiaceae	201174|Actinobacteria	EH	Peptidase C26	trpG	GO:0000162,GO:0005575,GO:0005622,GO:0005623,GO:0005737,GO:0005886,GO:0005950,GO:0006082,GO:0006520,GO:0006568,GO:0006576,GO:0006586,GO:0006725,GO:0006807,GO:0008150,GO:0008152,GO:0008652,GO:0009058,GO:0009072,GO:0009073,GO:0009308,GO:0009309,GO:0009987,GO:0016020,GO:0016053,GO:0018130,GO:0019438,GO:0019752,GO:0032991,GO:0034641,GO:0042401,GO:0042430,GO:0042435,GO:0043436,GO:0044106,GO:0044237,GO:…	2.6.1.85,4.1.3.27	ko:K01658,ko:K01664	ko00400,ko00405,ko00790,ko01100,ko01110,ko01130,ko01230,ko02024,ko02025,map00400,map00405,map00790,map01100,map01110,map01130,map01230,map02024,map02025	M00023	R00985,R00986,R01716	RC00010,RC01418,RC02148,RC02414	ko00000,ko00001,ko00002,ko01000	-	-	-	GATase
ENBDON_00037	1240349.ANGC01000021_gene3480	0.0	1187.0	COG0515@1|root,COG2815@1|root,COG0515@2|Bacteria,COG2815@2|Bacteria,2GJ1J@201174|Actinobacteria,4FU85@85025|Nocardiaceae	201174|Actinobacteria	KLT	serine threonine protein kinase	pknB	GO:0000270,GO:0003674,GO:0003824,GO:0004672,GO:0004674,GO:0005488,GO:0005515,GO:0005575,GO:0005618,GO:0005623,GO:0006022,GO:0006023,GO:0006024,GO:0006464,GO:0006468,GO:0006793,GO:0006796,GO:0006807,GO:0008047,GO:0008150,GO:0008152,GO:0008360,GO:0009058,GO:0009059,GO:0009252,GO:0009273,GO:0009605,GO:0009607,GO:0009889,GO:0009890,GO:0009892,GO:0009987,GO:0010565,GO:0010698,GO:0016301,GO:0016310,GO:…	2.7.11.1	ko:K08884,ko:K12132	-	-	-	-	ko00000,ko01000,ko01001	-	-	-	PASTA,Pkinase
ENBDON_00038	1240349.ANGC01000021_gene3481	3.89e-276	765.0	COG0515@1|root,COG0515@2|Bacteria,2GMPZ@201174|Actinobacteria,4FU54@85025|Nocardiaceae	201174|Actinobacteria	KLT	Serine threonine protein kinase	pknA	GO:0003674,GO:0003824,GO:0004672,GO:0004674,GO:0005575,GO:0005576,GO:0005622,GO:0005623,GO:0005737,GO:0005829,GO:0005886,GO:0006464,GO:0006468,GO:0006793,GO:0006796,GO:0006807,GO:0008150,GO:0008152,GO:0008360,GO:0009889,GO:0009890,GO:0009892,GO:0009987,GO:0010565,GO:0016020,GO:0016301,GO:0016310,GO:0016740,GO:0016772,GO:0016773,GO:0019216,GO:0019217,GO:0019222,GO:0019538,GO:0022603,GO:0022604,GO:…	2.7.11.1	ko:K08884,ko:K12132	-	-	-	-	ko00000,ko01000,ko01001	-	-	-	Pkinase
ENBDON_00039	1240349.ANGC01000021_gene3482	0.0	935.0	COG0768@1|root,COG0768@2|Bacteria,2GJUQ@201174|Actinobacteria,4FUHY@85025|Nocardiaceae	201174|Actinobacteria	M	Penicillin binding protein transpeptidase domain	pbpA	GO:0005575,GO:0005622,GO:0005623,GO:0005737,GO:0005829,GO:0044424,GO:0044444,GO:0044464	-	ko:K05364	ko00550,map00550	-	R04519	RC00005,RC00049	ko00000,ko00001,ko01011	-	-	-	Transpeptidase
ENBDON_00040	1240349.ANGC01000021_gene3483	0.0	897.0	COG0772@1|root,COG0772@2|Bacteria,2GJTI@201174|Actinobacteria,4FU3Q@85025|Nocardiaceae	201174|Actinobacteria	D	Belongs to the SEDS family	rodA	GO:0002682,GO:0002684,GO:0008150,GO:0009605,GO:0009607,GO:0009987,GO:0035821,GO:0043207,GO:0044003,GO:0044403,GO:0044419,GO:0048518,GO:0048583,GO:0048584,GO:0050776,GO:0050778,GO:0050789,GO:0050896,GO:0051301,GO:0051701,GO:0051704,GO:0051707,GO:0051817,GO:0052031,GO:0052173,GO:0052200,GO:0052255,GO:0052552,GO:0052553,GO:0052555,GO:0052556,GO:0052564,GO:0052572,GO:0065007,GO:0075136	-	ko:K03588	ko04112,map04112	-	-	-	ko00000,ko00001,ko02000,ko03036	2.A.103.1	-	-	FTSW_RODA_SPOVE
ENBDON_00041	1240349.ANGC01000021_gene3484	3.45e-250	696.0	COG0631@1|root,COG0631@2|Bacteria,2GJ3M@201174|Actinobacteria,4FVTF@85025|Nocardiaceae	201174|Actinobacteria	T	Protein phosphatase 2C	pstP	GO:0000287,GO:0001932,GO:0001933,GO:0003674,GO:0003824,GO:0004647,GO:0004721,GO:0005488,GO:0005575,GO:0005618,GO:0005623,GO:0005886,GO:0005887,GO:0006464,GO:0006469,GO:0006470,GO:0006793,GO:0006796,GO:0006807,GO:0008150,GO:0008152,GO:0009892,GO:0009987,GO:0010563,GO:0010605,GO:0016020,GO:0016021,GO:0016311,GO:0016787,GO:0016788,GO:0016791,GO:0019220,GO:0019222,GO:0019538,GO:0030145,GO:0030312,GO:…	3.1.3.16	ko:K20074	-	-	-	-	ko00000,ko01000,ko01009	-	-	-	PP2C,PP2C_2
ENBDON_00042	1240349.ANGC01000021_gene3485	1.83e-101	294.0	COG1716@1|root,COG1716@2|Bacteria,2GKA7@201174|Actinobacteria,4FXXS@85025|Nocardiaceae	201174|Actinobacteria	T	Inner membrane component of T3SS, cytoplasmic domain	fhaB	GO:0005575,GO:0005576,GO:0005623,GO:0005886,GO:0006950,GO:0006979,GO:0008150,GO:0009987,GO:0016020,GO:0040007,GO:0044110,GO:0044116,GO:0044117,GO:0044119,GO:0044403,GO:0044419,GO:0044464,GO:0050896,GO:0051301,GO:0051704,GO:0071944	-	-	-	-	-	-	-	-	-	-	FHA,Yop-YscD_cpl
ENBDON_00043	1240349.ANGC01000021_gene3486	1.32e-259	717.0	COG1716@1|root,COG1716@2|Bacteria,2GNU2@201174|Actinobacteria,4FX2I@85025|Nocardiaceae	201174|Actinobacteria	T	Protein of unknown function (DUF2662)	fhaA	GO:0003674,GO:0003676,GO:0003723,GO:0003729,GO:0005488,GO:0005575,GO:0005618,GO:0005622,GO:0005623,GO:0005737,GO:0005829,GO:0030312,GO:0044424,GO:0044444,GO:0044464,GO:0071944,GO:0097159,GO:1901363	-	-	-	-	-	-	-	-	-	-	DUF3662,FHA,Yop-YscD_cpl
ENBDON_00045	1240349.ANGC01000021_gene3487	6.77e-57	178.0	2BITV@1|root,32D1P@2|Bacteria,2HJ1F@201174|Actinobacteria,4G556@85025|Nocardiaceae	201174|Actinobacteria	-	-	-	-	-	-	-	-	-	-	-	-	-	-	-
ENBDON_00046	1240349.ANGC01000021_gene3488	0.0	1046.0	COG0028@1|root,COG0028@2|Bacteria,2GM6Y@201174|Actinobacteria,4FZBM@85025|Nocardiaceae	201174|Actinobacteria	EH	Thiamine pyrophosphate enzyme, central domain	ilvG	GO:0000287,GO:0003674,GO:0003824,GO:0003984,GO:0005488,GO:0006082,GO:0006520,GO:0006549,GO:0006573,GO:0006807,GO:0008150,GO:0008152,GO:0008652,GO:0009058,GO:0009081,GO:0009082,GO:0009097,GO:0009099,GO:0009987,GO:0016053,GO:0016740,GO:0016744,GO:0019752,GO:0019842,GO:0030976,GO:0036094,GO:0043167,GO:0043168,GO:0043169,GO:0043436,GO:0044237,GO:0044238,GO:0044249,GO:0044281,GO:0044283,GO:0046394,GO:…	2.2.1.6,4.1.1.8	ko:K01577,ko:K01652	ko00290,ko00630,ko00650,ko00660,ko00770,ko01100,ko01110,ko01130,ko01210,ko01230,map00290,map00630,map00650,map00660,map00770,map01100,map01110,map01130,map01210,map01230	M00019,M00570	R00006,R00014,R00226,R01908,R03050,R04672,R04673,R08648	RC00027,RC00106,RC00620,RC01192,RC02744,RC02893	ko00000,ko00001,ko00002,ko01000	-	-	iNJ661.Rv1820	TPP_enzyme_C,TPP_enzyme_M,TPP_enzyme_N
ENBDON_00047	1240349.ANGC01000021_gene3489	7.6e-226	624.0	COG0654@1|root,COG0654@2|Bacteria,2GIZU@201174|Actinobacteria,4FY7A@85025|Nocardiaceae	201174|Actinobacteria	CH	COG0654 2-polyprenyl-6-methoxyphenol hydroxylase and related FAD-dependent oxidoreductases	-	-	-	-	-	-	-	-	-	-	-	-	FAD_binding_3,NAD_binding_8
ENBDON_00048	1240349.ANGC01000021_gene3490	1.53e-114	330.0	COG3226@1|root,COG3226@2|Bacteria,2IQ9B@201174|Actinobacteria,4G90I@85025|Nocardiaceae	201174|Actinobacteria	K	TetR Family	-	-	-	-	-	-	-	-	-	-	-	-	TetR_C_6,TetR_N
ENBDON_00049	1240349.ANGC01000021_gene3491	0.0	3025.0	COG0067@1|root,COG0069@1|root,COG0070@1|root,COG0067@2|Bacteria,COG0069@2|Bacteria,COG0070@2|Bacteria,2GN09@201174|Actinobacteria,4FUG6@85025|Nocardiaceae	201174|Actinobacteria	E	glutamate synthase	gltB	GO:0003674,GO:0003824,GO:0005575,GO:0005622,GO:0005623,GO:0005737,GO:0005829,GO:0005886,GO:0006082,GO:0006520,GO:0006536,GO:0006537,GO:0006541,GO:0006807,GO:0008150,GO:0008152,GO:0008652,GO:0009058,GO:0009064,GO:0009084,GO:0009987,GO:0015930,GO:0016020,GO:0016053,GO:0016491,GO:0016638,GO:0019676,GO:0019740,GO:0019752,GO:0040007,GO:0043436,GO:0043648,GO:0043650,GO:0044237,GO:0044238,GO:0044249,GO:…	1.4.1.13,1.4.1.14,1.4.7.1	ko:K00265,ko:K00284	ko00250,ko00630,ko00910,ko01100,ko01110,ko01120,ko01130,ko01230,map00250,map00630,map00910,map01100,map01110,map01120,map01130,map01230	-	R00021,R00093,R00114,R00248,R10086	RC00006,RC00010,RC02799	ko00000,ko00001,ko01000	-	-	-	GATase_2,GXGXG,Glu_syn_central,Glu_synthase
ENBDON_00050	1240349.ANGC01000021_gene3492	0.0	969.0	COG0493@1|root,COG0493@2|Bacteria,2GJ0A@201174|Actinobacteria,4FWBE@85025|Nocardiaceae	201174|Actinobacteria	E	glutamate synthase	gltD	GO:0005575,GO:0005622,GO:0005623,GO:0005737,GO:0005829,GO:0005886,GO:0008150,GO:0016020,GO:0040007,GO:0044424,GO:0044444,GO:0044464,GO:0071944	1.4.1.13,1.4.1.14	ko:K00266	ko00250,ko00910,ko01100,ko01110,ko01120,ko01130,ko01230,map00250,map00910,map01100,map01110,map01120,map01130,map01230	-	R00093,R00114,R00248	RC00006,RC00010,RC02799	ko00000,ko00001,ko01000	-	-	iNJ661.Rv3858c	Fer4_20,Pyr_redox_2
ENBDON_00051	1240349.ANGC01000021_gene3493	7.39e-94	284.0	2APE0@1|root,31EGM@2|Bacteria,2HHZ2@201174|Actinobacteria,4G1TH@85025|Nocardiaceae	201174|Actinobacteria	-	-	-	-	-	-	-	-	-	-	-	-	-	-	-
ENBDON_00052	1429046.RR21198_2727	2.89e-199	554.0	2DUAT@1|root,33PQG@2|Bacteria,2IFMT@201174|Actinobacteria,4FUK4@85025|Nocardiaceae	201174|Actinobacteria	S	Cutinase	-	-	-	-	-	-	-	-	-	-	-	-	Cutinase
ENBDON_00053	1240349.ANGC01000021_gene3495	1.4e-100	292.0	COG1683@1|root,COG1683@2|Bacteria,2IJAV@201174|Actinobacteria,4G76G@85025|Nocardiaceae	201174|Actinobacteria	S	Protein of unknown function (DUF523)	-	-	2.4.2.1	ko:K03783	ko00230,ko00240,ko00760,ko01100,ko01110,map00230,map00240,map00760,map01100,map01110	-	R01561,R01863,R01969,R02147,R02294,R02295,R02297,R02484,R02557,R02748,R08368,R10244	RC00033,RC00063,RC00122	ko00000,ko00001,ko01000	-	-	-	DUF523,PNP_UDP_1
ENBDON_00054	1240349.ANGC01000021_gene3496	8.52e-198	550.0	COG0300@1|root,COG0300@2|Bacteria,2I2RM@201174|Actinobacteria,4G9IE@85025|Nocardiaceae	201174|Actinobacteria	I	Belongs to the short-chain dehydrogenases reductases (SDR) family	ephD	-	-	-	-	-	-	-	-	-	-	-	Abhydrolase_1,adh_short
ENBDON_00055	1240349.ANGC01000021_gene3497	3.23e-59	183.0	COG1359@1|root,COG1359@2|Bacteria,2IM0B@201174|Actinobacteria,4G3Q9@85025|Nocardiaceae	201174|Actinobacteria	S	Antibiotic biosynthesis monooxygenase	-	-	-	-	-	-	-	-	-	-	-	-	ABM
ENBDON_00056	1240349.ANGC01000021_gene3500	1.69e-27	99.8	2AQBW@1|root,31FI2@2|Bacteria,2HJ24@201174|Actinobacteria,4G569@85025|Nocardiaceae	201174|Actinobacteria	-	-	-	-	-	-	-	-	-	-	-	-	-	-	-
ENBDON_00057	1240349.ANGC01000021_gene3501	3.33e-37	129.0	2DRKZ@1|root,33C8D@2|Bacteria,2HIDK@201174|Actinobacteria,4G3U3@85025|Nocardiaceae	201174|Actinobacteria	-	-	-	-	-	-	-	-	-	-	-	-	-	-	-
ENBDON_00058	1240349.ANGC01000021_gene3502	5.73e-136	385.0	COG0406@1|root,COG0406@2|Bacteria,2GM22@201174|Actinobacteria,4FVGX@85025|Nocardiaceae	201174|Actinobacteria	G	Phosphoglycerate mutase family	-	-	-	-	-	-	-	-	-	-	-	-	His_Phos_1
ENBDON_00059	1240349.ANGC01000021_gene3503	0.0	2071.0	COG1190@1|root,COG2898@1|root,COG1190@2|Bacteria,COG2898@2|Bacteria,2GKE0@201174|Actinobacteria,4FUDM@85025|Nocardiaceae	201174|Actinobacteria	J	Catalyzes the production of L-lysyl-tRNA(Lys)transfer and the transfer of a lysyl group from L-lysyl-tRNA(Lys) to membrane-bound phosphatidylglycerol (PG), which produces lysylphosphatidylglycerol (LPG), one of the components of the bacterial membrane with a positive net charge. LPG synthesis contributes to the resistance to cationic antimicrobial peptides (CAMPs) and likely protects M.tuberculos…	lysX	GO:0005575,GO:0005618,GO:0005622,GO:0005623,GO:0005737,GO:0005829,GO:0005886,GO:0006082,GO:0006139,GO:0006399,GO:0006412,GO:0006418,GO:0006430,GO:0006518,GO:0006520,GO:0006629,GO:0006644,GO:0006650,GO:0006725,GO:0006793,GO:0006796,GO:0006807,GO:0008150,GO:0008152,GO:0008610,GO:0008654,GO:0009058,GO:0009059,GO:0009405,GO:0009987,GO:0010467,GO:0016020,GO:0016070,GO:0019538,GO:0019637,GO:0019752,GO:…	6.1.1.6	ko:K04567	ko00970,map00970	M00359,M00360	R03658	RC00055,RC00523	ko00000,ko00001,ko00002,ko01000,ko01007,ko03016	-	-	-	DUF2156,tRNA-synt_2,tRNA-synt_2_TM,tRNA_anti-codon
ENBDON_00060	1240349.ANGC01000021_gene3511	4.14e-280	769.0	COG4325@1|root,COG4325@2|Bacteria,2GWFP@201174|Actinobacteria,4FYAN@85025|Nocardiaceae	201174|Actinobacteria	S	Predicted membrane protein (DUF2254)	-	-	-	-	-	-	-	-	-	-	-	-	DUF2254
ENBDON_00061	1240349.ANGC01000021_gene3512	4e-76	227.0	COG1544@1|root,COG1544@2|Bacteria,2GPJ5@201174|Actinobacteria,4G331@85025|Nocardiaceae	201174|Actinobacteria	J	Required for dimerization of active 70S ribosomes into 100S ribosomes in stationary phase	-	-	-	-	-	-	-	-	-	-	-	-	Ribosomal_S30AE
ENBDON_00062	1240349.ANGC01000021_gene3513	0.0	1183.0	COG2409@1|root,COG2409@2|Bacteria,2GIRQ@201174|Actinobacteria,4FW6E@85025|Nocardiaceae	201174|Actinobacteria	T	MMPL family	-	-	-	ko:K06994	-	-	-	-	ko00000	-	-	-	MMPL
ENBDON_00063	1240349.ANGC01000021_gene3514	1.39e-91	268.0	COG1846@1|root,COG1846@2|Bacteria,2IQXC@201174|Actinobacteria,4G235@85025|Nocardiaceae	201174|Actinobacteria	K	helix_turn_helix multiple antibiotic resistance protein	-	-	-	-	-	-	-	-	-	-	-	-	HTH_27,MarR,MarR_2
ENBDON_00064	1240349.ANGC01000021_gene3515	3.43e-131	377.0	COG5343@1|root,COG5343@2|Bacteria,2I8NI@201174|Actinobacteria,4G28U@85025|Nocardiaceae	201174|Actinobacteria	S	Anti-sigma-K factor rskA	rskA	GO:0000988,GO:0000989,GO:0003674,GO:0005575,GO:0005618,GO:0005623,GO:0005886,GO:0006417,GO:0008150,GO:0009889,GO:0010468,GO:0010556,GO:0010608,GO:0016020,GO:0016989,GO:0019219,GO:0019222,GO:0030312,GO:0031323,GO:0031326,GO:0032268,GO:0034248,GO:0044464,GO:0050789,GO:0050794,GO:0051171,GO:0051246,GO:0051252,GO:0060255,GO:0065007,GO:0071944,GO:0080090,GO:0140110,GO:1903506,GO:2000112,GO:2001141	-	-	-	-	-	-	-	-	-	-	RskA
ENBDON_00065	1240349.ANGC01000021_gene3516	6.49e-129	367.0	COG1595@1|root,COG1595@2|Bacteria,2GP9D@201174|Actinobacteria,4FWK1@85025|Nocardiaceae	201174|Actinobacteria	K	Belongs to the sigma-70 factor family. ECF subfamily	sigK	GO:0005575,GO:0005618,GO:0005623,GO:0005886,GO:0008150,GO:0010468,GO:0010565,GO:0016020,GO:0019216,GO:0019217,GO:0019222,GO:0030312,GO:0031323,GO:0044464,GO:0050789,GO:0050794,GO:0060255,GO:0062012,GO:0065007,GO:0071944,GO:0080090	-	ko:K03088	-	-	-	-	ko00000,ko03021	-	-	-	Sigma70_r2,Sigma70_r4,Sigma70_r4_2
ENBDON_00066	1240349.ANGC01000021_gene3517	2e-150	422.0	COG1073@1|root,COG1073@2|Bacteria,2I30Z@201174|Actinobacteria,4G2CD@85025|Nocardiaceae	201174|Actinobacteria	S	Alpha/beta hydrolase family	-	-	-	-	-	-	-	-	-	-	-	-	Abhydrolase_6,Hydrolase_4
ENBDON_00067	1240349.ANGC01000021_gene3519	9.34e-112	324.0	COG2335@1|root,COG2335@2|Bacteria,2GJC2@201174|Actinobacteria,4FVIJ@85025|Nocardiaceae	201174|Actinobacteria	M	Four repeated domains in the Fasciclin I family of proteins, present in many other contexts.	mpt	GO:0005575,GO:0005576,GO:0005615,GO:0005623,GO:0005886,GO:0008150,GO:0009605,GO:0009607,GO:0016020,GO:0030288,GO:0030313,GO:0031975,GO:0042597,GO:0043207,GO:0044403,GO:0044419,GO:0044421,GO:0044464,GO:0050896,GO:0051701,GO:0051704,GO:0051707,GO:0052173,GO:0052200,GO:0052564,GO:0052572,GO:0071944,GO:0075136	-	-	-	-	-	-	-	-	-	-	Fasciclin
ENBDON_00068	1240349.ANGC01000021_gene3520	1.53e-128	366.0	COG3040@1|root,COG3040@2|Bacteria,2I98C@201174|Actinobacteria,4G0MI@85025|Nocardiaceae	201174|Actinobacteria	M	Lipocalin-like domain	-	-	-	ko:K03098	-	-	-	-	ko00000,ko04147	-	-	-	Lipocalin_2
ENBDON_00069	1240349.ANGC01000021_gene3521	0.0	1157.0	COG1292@1|root,COG1292@2|Bacteria,2GJX0@201174|Actinobacteria,4FX41@85025|Nocardiaceae	201174|Actinobacteria	M	Belongs to the BCCT transporter (TC 2.A.15) family	betP	GO:0005575,GO:0005576,GO:0005623,GO:0005886,GO:0006810,GO:0008150,GO:0016020,GO:0044464,GO:0051179,GO:0051234,GO:0071705,GO:0071944	-	ko:K02168	-	-	-	-	ko00000,ko02000	2.A.15.1.3,2.A.15.1.4	-	-	BCCT
ENBDON_00070	1240349.ANGC01000021_gene3522	0.0	1019.0	COG0702@1|root,COG0702@2|Bacteria,2GIZA@201174|Actinobacteria,4FXFF@85025|Nocardiaceae	201174|Actinobacteria	GM	NmrA-like family	-	-	-	-	-	-	-	-	-	-	-	-	DUF2867,NAD_binding_10,TspO_MBR
ENBDON_00071	1240349.ANGC01000021_gene3523	0.0	880.0	COG1090@1|root,COG4276@1|root,COG1090@2|Bacteria,COG4276@2|Bacteria,2GJS0@201174|Actinobacteria,4FX6N@85025|Nocardiaceae	201174|Actinobacteria	S	Domain of unknown function (DUF1731)	-	-	-	ko:K07071	-	-	-	-	ko00000	-	-	-	DUF1731,Epimerase
ENBDON_00073	1240349.ANGC01000021_gene3524	0.0	931.0	COG0415@1|root,COG0415@2|Bacteria,2GJXU@201174|Actinobacteria,4FWSP@85025|Nocardiaceae	201174|Actinobacteria	L	Belongs to the DNA photolyase family	phr	-	4.1.99.3	ko:K01669	-	-	-	-	ko00000,ko01000,ko03400	-	-	-	DNA_photolyase,FAD_binding_7
ENBDON_00074	1429046.RR21198_5300	1.28e-41	137.0	COG2501@1|root,COG2501@2|Bacteria,2GQG8@201174|Actinobacteria,4G34Y@85025|Nocardiaceae	201174|Actinobacteria	S	S4 domain	yaaA	-	-	ko:K14761	-	-	-	-	ko00000,ko03009	-	-	-	S4_2
ENBDON_00075	1429046.RR21198_5019	1.06e-208	587.0	COG1055@1|root,COG1055@2|Bacteria,2GMQJ@201174|Actinobacteria,4FXZJ@85025|Nocardiaceae	201174|Actinobacteria	P	Arsenical pump membrane protein	arsB	-	-	ko:K03893	-	-	-	-	ko00000,ko02000	2.A.45.1,3.A.4.1	-	-	ArsB
ENBDON_00076	1435356.Y013_16730	1.62e-12	63.2	2APW2@1|root,31F0I@2|Bacteria,2GU35@201174|Actinobacteria,4G3UN@85025|Nocardiaceae	201174|Actinobacteria	-	-	-	-	-	-	-	-	-	-	-	-	-	-	-
ENBDON_00077	1240349.ANGC01000021_gene3527	1.38e-92	270.0	2F93U@1|root,341FE@2|Bacteria,2INFK@201174|Actinobacteria,4G0YY@85025|Nocardiaceae	201174|Actinobacteria	-	-	-	-	-	-	-	-	-	-	-	-	-	-	-
ENBDON_00078	1240349.ANGC01000021_gene3528	1.7e-118	339.0	COG0824@1|root,COG0824@2|Bacteria,2IHBJ@201174|Actinobacteria,4G2GP@85025|Nocardiaceae	201174|Actinobacteria	S	Thioesterase-like superfamily	-	-	-	-	-	-	-	-	-	-	-	-	4HBT_2
ENBDON_00079	1240349.ANGC01000021_gene3529	8.57e-114	326.0	COG0684@1|root,COG0684@2|Bacteria,2IHQY@201174|Actinobacteria,4FUUZ@85025|Nocardiaceae	201174|Actinobacteria	H	Catalyzes the aldol cleavage of 4-hydroxy-4-methyl-2- oxoglutarate (HMG) into 2 molecules of pyruvate. Also contains a secondary oxaloacetate (OAA) decarboxylase activity due to the common pyruvate enolate transition state formed following C-C bond cleavage in the retro-aldol and decarboxylation reactions	rraA	-	-	ko:K02553	-	-	-	-	ko00000,ko03019	-	-	-	RraA-like
ENBDON_00080	1429046.RR21198_5817	6.22e-163	457.0	COG2186@1|root,COG2186@2|Bacteria,2HU82@201174|Actinobacteria,4G8X4@85025|Nocardiaceae	201174|Actinobacteria	K	FCD	-	-	-	-	-	-	-	-	-	-	-	-	FCD,GntR
ENBDON_00081	1240349.ANGC01000021_gene3531	1.16e-81	242.0	2BY40@1|root,3009S@2|Bacteria,2IIQR@201174|Actinobacteria,4G91Q@85025|Nocardiaceae	201174|Actinobacteria	S	Family of unknown function (DUF5313)	-	-	-	-	-	-	-	-	-	-	-	-	DUF5313
ENBDON_00082	1240349.ANGC01000021_gene3532	0.0	1202.0	COG1022@1|root,COG1022@2|Bacteria,2GIXQ@201174|Actinobacteria,4FV8C@85025|Nocardiaceae	201174|Actinobacteria	I	AMP-binding enzyme	-	-	6.2.1.3	ko:K01897	ko00061,ko00071,ko01100,ko01212,ko02024,ko03320,ko04146,ko04216,ko04714,ko04920,map00061,map00071,map01100,map01212,map02024,map03320,map04146,map04216,map04714,map04920	M00086	R01280	RC00004,RC00014	ko00000,ko00001,ko00002,ko01000,ko01004,ko04147	4.C.1.1	-	-	AMP-binding
ENBDON_00084	1429046.RR21198_5814	7.94e-253	696.0	COG0582@1|root,COG0582@2|Bacteria,2I2PA@201174|Actinobacteria,4FXTI@85025|Nocardiaceae	201174|Actinobacteria	L	Belongs to the 'phage' integrase family	-	-	-	-	-	-	-	-	-	-	-	-	Phage_integrase
ENBDON_00085	1429046.RR21198_3724	5.21e-138	402.0	COG4974@1|root,COG4974@2|Bacteria,2IJV0@201174|Actinobacteria,4G2EE@85025|Nocardiaceae	201174|Actinobacteria	L	Belongs to the 'phage' integrase family	-	-	-	-	-	-	-	-	-	-	-	-	-
ENBDON_00087	1435356.Y013_26045	4.31e-76	227.0	2BF5Y@1|root,328YB@2|Bacteria,2HIXT@201174|Actinobacteria,4G4Y2@85025|Nocardiaceae	201174|Actinobacteria	-	-	-	-	-	-	-	-	-	-	-	-	-	-	-
ENBDON_00088	1429046.RR21198_3673	3.27e-72	219.0	COG3311@1|root,COG3311@2|Bacteria,2IQFY@201174|Actinobacteria,4G1PQ@85025|Nocardiaceae	201174|Actinobacteria	K	Helix-turn-helix domain	-	-	-	-	-	-	-	-	-	-	-	-	HTH_17
ENBDON_00089	1449347.JQLN01000005_gene3499	8.03e-66	206.0	COG1569@1|root,COG1569@2|Bacteria,2HZNY@201174|Actinobacteria,2M5W4@2063|Kitasatospora	201174|Actinobacteria	S	PIN domain	-	-	-	-	-	-	-	-	-	-	-	-	PIN_3
ENBDON_00090	101510.RHA1_ro01667	6.09e-72	217.0	COG3293@1|root,COG3293@2|Bacteria,2IIB4@201174|Actinobacteria,4G2PD@85025|Nocardiaceae	201174|Actinobacteria	L	transposase	-	-	-	-	-	-	-	-	-	-	-	-	DUF4096
ENBDON_00091	1116232.AHBF01000030_gene6429	8.31e-74	224.0	COG3293@1|root,COG3293@2|Bacteria,2IIAY@201174|Actinobacteria	201174|Actinobacteria	L	Transposase	-	-	-	-	-	-	-	-	-	-	-	-	DDE_Tnp_1,DDE_Tnp_1_2,DUF4096
ENBDON_00092	1449069.JMLO01000017_gene3283	5.07e-44	152.0	COG1028@1|root,COG1028@2|Bacteria,2GNM4@201174|Actinobacteria,4FXDR@85025|Nocardiaceae	201174|Actinobacteria	IQ	Enoyl-(Acyl carrier protein) reductase	-	-	-	-	-	-	-	-	-	-	-	-	adh_short_C2
ENBDON_00093	1206737.BAGF01000059_gene3904	4.27e-196	550.0	COG1064@1|root,COG1064@2|Bacteria,2GKNW@201174|Actinobacteria,4FX4J@85025|Nocardiaceae	201174|Actinobacteria	P	alcohol dehydrogenase	-	-	1.1.1.1	ko:K13953	ko00010,ko00071,ko00350,ko00625,ko00626,ko00830,ko00980,ko00982,ko01100,ko01110,ko01120,ko01130,ko01220,map00010,map00071,map00350,map00625,map00626,map00830,map00980,map00982,map01100,map01110,map01120,map01130,map01220	-	R00623,R00754,R02124,R04880,R05233,R05234,R06917,R06927,R07105,R08281,R08306,R08310	RC00050,RC00087,RC00088,RC00099,RC00116,RC00649,RC01734,RC02273	ko00000,ko00001,ko01000	-	-	-	ADH_N,ADH_zinc_N,ADH_zinc_N_2
ENBDON_00094	1278078.G419_21999	9.21e-224	622.0	COG1680@1|root,COG1680@2|Bacteria,2GJJB@201174|Actinobacteria,4FXBC@85025|Nocardiaceae	201174|Actinobacteria	V	COG1680 Beta-lactamase class C and other penicillin binding proteins	-	-	-	-	-	-	-	-	-	-	-	-	Beta-lactamase
ENBDON_00095	1278078.G419_21994	8.55e-280	770.0	COG2072@1|root,COG2072@2|Bacteria,2GMDH@201174|Actinobacteria,4FYI4@85025|Nocardiaceae	201174|Actinobacteria	P	L-lysine 6-monooxygenase (NADPH-requiring)	-	-	-	-	-	-	-	-	-	-	-	-	FMO-like,K_oxygenase
ENBDON_00096	234621.RER_56790	2.94e-92	276.0	COG1309@1|root,COG1309@2|Bacteria,2IB0A@201174|Actinobacteria,4G94Z@85025|Nocardiaceae	201174|Actinobacteria	K	Bacterial regulatory proteins, tetR family	-	-	-	-	-	-	-	-	-	-	-	-	TetR_N
ENBDON_00097	862751.SACTE_0723	5.45e-78	243.0	COG3293@1|root,COG3293@2|Bacteria,2IIMK@201174|Actinobacteria	201174|Actinobacteria	L	Transposase	-	-	-	-	-	-	-	-	-	-	-	-	DDE_Tnp_1_2,DUF4096
ENBDON_00098	1449069.JMLO01000023_gene935	0.0	897.0	COG1053@1|root,COG1053@2|Bacteria,2GKS3@201174|Actinobacteria,4FUFM@85025|Nocardiaceae	201174|Actinobacteria	C	FAD binding domain	-	-	1.3.99.5	ko:K16051	ko00984,ko01120,map00984,map01120	-	R01834	RC00145	ko00000,ko00001,ko01000	-	-	-	FAD_binding_2
ENBDON_00099	1110697.NCAST_32_02680	3.27e-99	294.0	COG0346@1|root,COG0346@2|Bacteria,2GM8H@201174|Actinobacteria,4FUPC@85025|Nocardiaceae	201174|Actinobacteria	E	Glyoxalase/Bleomycin resistance protein/Dioxygenase superfamily	bphC	-	1.13.11.25	ko:K16049	ko00984,ko01100,ko01120,ko01220,map00984,map01100,map01120,map01220	-	R04597	RC01610	ko00000,ko00001,ko01000	-	-	-	Glyoxalase
ENBDON_00101	1116232.AHBF01000030_gene6429	8.31e-74	224.0	COG3293@1|root,COG3293@2|Bacteria,2IIAY@201174|Actinobacteria	201174|Actinobacteria	L	Transposase	-	-	-	-	-	-	-	-	-	-	-	-	DDE_Tnp_1,DDE_Tnp_1_2,DUF4096
ENBDON_00102	101510.RHA1_ro01667	6.09e-72	217.0	COG3293@1|root,COG3293@2|Bacteria,2IIB4@201174|Actinobacteria,4G2PD@85025|Nocardiaceae	201174|Actinobacteria	L	transposase	-	-	-	-	-	-	-	-	-	-	-	-	DUF4096
ENBDON_00103	1323361.JPOC01000005_gene348	7.12e-206	572.0	COG2175@1|root,COG2175@2|Bacteria,2GNUC@201174|Actinobacteria,4FUZ8@85025|Nocardiaceae	201174|Actinobacteria	Q	dioxygenase	tauD	-	1.14.11.17	ko:K03119,ko:K22303	ko00430,ko00920,map00430,map00920	-	R05320	RC01331	ko00000,ko00001,ko01000	-	-	-	TauD
ENBDON_00104	685727.REQ_06670	4.53e-206	588.0	COG0477@1|root,COG2814@2|Bacteria,2I47F@201174|Actinobacteria,4G9HJ@85025|Nocardiaceae	201174|Actinobacteria	EGP	Major Facilitator Superfamily	-	-	-	-	-	-	-	-	-	-	-	-	MFS_1,Sugar_tr
ENBDON_00105	685727.REQ_09150	1.4e-139	397.0	COG0778@1|root,COG0778@2|Bacteria,2HR6Z@201174|Actinobacteria,4FVR5@85025|Nocardiaceae	201174|Actinobacteria	C	nitroreductase	-	-	-	-	-	-	-	-	-	-	-	-	Nitroreductase
ENBDON_00106	1077144.AGFF01000007_gene1720	1.41e-285	791.0	COG0318@1|root,COG0318@2|Bacteria,2GJA2@201174|Actinobacteria	201174|Actinobacteria	IQ	synthetase	-	-	6.2.1.42	ko:K18688	-	-	-	-	ko00000,ko01000	-	-	-	AMP-binding,AMP-binding_C
ENBDON_00107	1323361.JPOC01000005_gene350	1.15e-139	400.0	COG1024@1|root,COG1024@2|Bacteria,2ID1U@201174|Actinobacteria,4FYRT@85025|Nocardiaceae	201174|Actinobacteria	I	Enoyl-CoA hydratase/isomerase	-	-	-	-	-	-	-	-	-	-	-	-	ECH_1
ENBDON_00108	1323361.JPOC01000037_gene4186	5.85e-213	601.0	COG1012@1|root,COG1012@2|Bacteria,2GIWZ@201174|Actinobacteria,4FZBD@85025|Nocardiaceae	201174|Actinobacteria	C	Aldehyde dehydrogenase family	-	-	1.2.1.3	ko:K00128	ko00010,ko00053,ko00071,ko00280,ko00310,ko00330,ko00340,ko00380,ko00410,ko00561,ko00620,ko00625,ko00903,ko00981,ko01100,ko01110,ko01120,ko01130,map00010,map00053,map00071,map00280,map00310,map00330,map00340,map00380,map00410,map00561,map00620,map00625,map00903,map00981,map01100,map01110,map01120,map01130	M00135	R00264,R00631,R00710,R00904,R01752,R01986,R02549,R02678,R02940,R02957,R03283,R03869,R04065,R04506,R04903,R05050,R05237,R05238,R05286,R06366,R08146	RC00047,RC00071,RC00080,RC00186,RC00218,RC00242,RC00816,RC01500	ko00000,ko00001,ko00002,ko01000	-	-	-	Aldedh
ENBDON_00109	1278078.G419_26239	5.14e-271	743.0	COG0183@1|root,COG0183@2|Bacteria,2GIY0@201174|Actinobacteria,4FW26@85025|Nocardiaceae	201174|Actinobacteria	I	Belongs to the thiolase family	-	-	2.3.1.16	ko:K00632	ko00071,ko00280,ko00281,ko00362,ko00592,ko00642,ko01100,ko01110,ko01120,ko01130,ko01212,map00071,map00280,map00281,map00362,map00592,map00642,map01100,map01110,map01120,map01130,map01212	M00087,M00113	R00829,R00927,R01177,R03778,R03858,R03991,R04546,R04742,R04747,R05506,R05586,R07891,R07895,R07899,R08091,R08095	RC00004,RC00326,RC00405,RC01702,RC02728,RC02898,RC02955	ko00000,ko00001,ko00002,ko01000	-	-	-	Thiolase_C,Thiolase_N
ENBDON_00110	1429046.RR21198_0285	2.95e-27	99.8	COG3328@1|root,COG3328@2|Bacteria	2|Bacteria	L	transposase activity	-	-	-	ko:K07493	-	-	-	-	ko00000	-	-	-	Transposase_mut
ENBDON_00111	321955.AAGP01000053_gene266	8.6e-20	82.8	COG4974@1|root,COG4974@2|Bacteria,2IBD6@201174|Actinobacteria	201174|Actinobacteria	L	Belongs to the 'phage' integrase family	-	-	-	-	-	-	-	-	-	-	-	-	Phage_integrase
ENBDON_00113	426716.JOAJ01000001_gene740	6.81e-11	61.2	2A03E@1|root,30N5X@2|Bacteria,2HKHT@201174|Actinobacteria,4G8CM@85025|Nocardiaceae	201174|Actinobacteria	S	Domain of unknown function (DUF202)	-	-	-	-	-	-	-	-	-	-	-	-	DUF202
ENBDON_00114	426716.JOAJ01000001_gene741	3.56e-38	131.0	COG2149@1|root,COG2149@2|Bacteria,2GQU9@201174|Actinobacteria,4G4JK@85025|Nocardiaceae	201174|Actinobacteria	S	Domain of unknown function (DUF202)	-	-	-	ko:K00389	-	-	-	-	ko00000	-	-	-	DUF202
ENBDON_00115	1116232.AHBF01000030_gene6429	8.31e-74	224.0	COG3293@1|root,COG3293@2|Bacteria,2IIAY@201174|Actinobacteria	201174|Actinobacteria	L	Transposase	-	-	-	-	-	-	-	-	-	-	-	-	DDE_Tnp_1,DDE_Tnp_1_2,DUF4096
ENBDON_00116	101510.RHA1_ro01667	6.09e-72	217.0	COG3293@1|root,COG3293@2|Bacteria,2IIB4@201174|Actinobacteria,4G2PD@85025|Nocardiaceae	201174|Actinobacteria	L	transposase	-	-	-	-	-	-	-	-	-	-	-	-	DUF4096
ENBDON_00117	1282876.BAOK01000001_gene1820	9.24e-131	393.0	COG1012@1|root,COG1012@2|Bacteria,1MU1V@1224|Proteobacteria,2TQR1@28211|Alphaproteobacteria	28211|Alphaproteobacteria	C	belongs to the aldehyde dehydrogenase family	-	-	-	-	-	-	-	-	-	-	-	-	Aldedh
ENBDON_00118	419947.MRA_2286	1.28e-103	320.0	COG2124@1|root,COG2124@2|Bacteria,2GKCG@201174|Actinobacteria,232KS@1762|Mycobacteriaceae	201174|Actinobacteria	Q	cytochrome p450	cyp124A1	GO:0000166,GO:0003674,GO:0003824,GO:0004497,GO:0005488,GO:0006066,GO:0006082,GO:0006629,GO:0006631,GO:0006706,GO:0006707,GO:0008150,GO:0008152,GO:0008202,GO:0008203,GO:0008395,GO:0009056,GO:0009987,GO:0010430,GO:0016042,GO:0016125,GO:0016127,GO:0016491,GO:0016705,GO:0016709,GO:0019395,GO:0019752,GO:0020037,GO:0030258,GO:0031073,GO:0032787,GO:0034440,GO:0036094,GO:0036199,GO:0043167,GO:0043168,GO:…	1.14.15.14	ko:K20497	-	-	-	-	ko00000,ko00199,ko01000	-	-	-	p450
ENBDON_00119	882083.SacmaDRAFT_5545	1.1e-13	66.6	COG1141@1|root,COG1141@2|Bacteria,2GWHY@201174|Actinobacteria,4E7GQ@85010|Pseudonocardiales	201174|Actinobacteria	C	Divergent 4Fe-4S mono-cluster	-	-	-	ko:K05337	-	-	-	-	ko00000	-	-	-	Fer4_13,Fer4_15
ENBDON_00120	1089453.GOSPT_096_00070	2.39e-36	126.0	COG0633@1|root,COG0633@2|Bacteria,2GRQF@201174|Actinobacteria,4GF7I@85026|Gordoniaceae	201174|Actinobacteria	C	2Fe-2S iron-sulfur cluster binding domain	-	-	-	ko:K04755	-	-	-	-	ko00000	-	-	-	Fer2
ENBDON_00121	1463934.JOCF01000006_gene6387	1.83e-119	361.0	COG0446@1|root,COG0446@2|Bacteria,2GJKT@201174|Actinobacteria	201174|Actinobacteria	Q	pyridine nucleotide-disulphide oxidoreductase	-	-	1.18.1.3	ko:K00529	ko00071,ko00360,ko01120,ko01220,map00071,map00360,map01120,map01220	M00545	R02000,R06782,R06783	RC00098	br01602,ko00000,ko00001,ko00002,ko01000	-	-	-	Pyr_redox_2,Reductase_C
ENBDON_00124	1323361.JPOC01000022_gene2998	2.46e-59	192.0	COG1309@1|root,COG1309@2|Bacteria,2GWAE@201174|Actinobacteria	201174|Actinobacteria	K	Bacterial regulatory proteins, tetR family	-	-	-	-	-	-	-	-	-	-	-	-	TetR_N
ENBDON_00125	1323361.JPOC01000022_gene2997	4.33e-178	508.0	COG1804@1|root,COG1804@2|Bacteria,2GIU7@201174|Actinobacteria,4FWS1@85025|Nocardiaceae	201174|Actinobacteria	C	CoA-transferase family III	-	-	-	-	-	-	-	-	-	-	-	-	CoA_transf_3
ENBDON_00126	1323361.JPOC01000022_gene2995	7.37e-120	355.0	COG1062@1|root,COG1062@2|Bacteria,2GM8C@201174|Actinobacteria,4FZ5R@85025|Nocardiaceae	201174|Actinobacteria	C	Alcohol dehydrogenase GroES-like domain	-	-	1.1.1.1,1.1.1.284	ko:K00121	ko00010,ko00071,ko00350,ko00625,ko00626,ko00680,ko00830,ko00980,ko00982,ko01100,ko01110,ko01120,ko01130,ko01200,ko01220,ko05204,map00010,map00071,map00350,map00625,map00626,map00680,map00830,map00980,map00982,map01100,map01110,map01120,map01130,map01200,map01220,map05204	-	R00623,R00754,R02124,R04880,R05233,R05234,R06917,R06927,R06983,R07105,R08281,R08306,R08310	RC00050,RC00087,RC00088,RC00099,RC00116,RC00649,RC01715,RC01734,RC02273	ko00000,ko00001,ko01000	-	-	-	ADH_N,ADH_zinc_N
ENBDON_00127	37919.EP51_01225	2.65e-157	459.0	COG2271@1|root,COG2271@2|Bacteria,2GIS1@201174|Actinobacteria,4G6Q1@85025|Nocardiaceae	201174|Actinobacteria	G	Major Facilitator Superfamily	-	-	-	ko:K08194	-	-	-	-	ko00000,ko02000	2.A.1.14.7	-	-	MFS_1,Sugar_tr
ENBDON_00128	1435356.Y013_20905	1.86e-97	291.0	COG2203@1|root,COG2203@2|Bacteria,2IJRN@201174|Actinobacteria,4G2B0@85025|Nocardiaceae	201174|Actinobacteria	T	ANTAR	-	-	-	-	-	-	-	-	-	-	-	-	ANTAR,GAF_2
ENBDON_00129	1435356.Y013_20900	6.32e-48	158.0	COG2208@1|root,COG2208@2|Bacteria,2GNG4@201174|Actinobacteria,4G57Z@85025|Nocardiaceae	201174|Actinobacteria	KT	phosphatase	-	-	-	-	-	-	-	-	-	-	-	-	SpoIIE
ENBDON_00130	1435356.Y013_20895	2e-71	222.0	COG2207@1|root,COG2207@2|Bacteria,2IBP1@201174|Actinobacteria,4FVP2@85025|Nocardiaceae	201174|Actinobacteria	K	AraC family transcriptional regulator	-	-	-	-	-	-	-	-	-	-	-	-	AraC_binding_2,HTH_18
ENBDON_00131	1122611.KB903999_gene8185	9.46e-62	204.0	2ECUS@1|root,336S8@2|Bacteria,2HWUQ@201174|Actinobacteria,4EQ0U@85012|Streptosporangiales	201174|Actinobacteria	-	-	-	-	-	-	-	-	-	-	-	-	-	-	-
ENBDON_00132	1122611.KB903999_gene8184	2.09e-64	204.0	COG1309@1|root,COG1309@2|Bacteria,2IT26@201174|Actinobacteria,4EKNT@85012|Streptosporangiales	201174|Actinobacteria	K	Bacterial regulatory proteins, tetR family	-	-	-	-	-	-	-	-	-	-	-	-	TetR_N
ENBDON_00133	1429046.RR21198_5461	1.18e-188	540.0	COG0443@1|root,COG0443@2|Bacteria,2H237@201174|Actinobacteria,4FUFW@85025|Nocardiaceae	201174|Actinobacteria	O	Hsp70 protein	-	-	-	-	-	-	-	-	-	-	-	-	HSP70
ENBDON_00134	1240349.ANGC01000062_gene4326	3.05e-110	318.0	COG2230@1|root,COG2230@2|Bacteria,2IHZD@201174|Actinobacteria,4G0RW@85025|Nocardiaceae	201174|Actinobacteria	M	Methyltransferase type 12	-	-	-	-	-	-	-	-	-	-	-	-	DinB_2
ENBDON_00135	1435356.Y013_00405	0.0	988.0	COG3276@1|root,COG3276@2|Bacteria,2GKF9@201174|Actinobacteria,4G688@85025|Nocardiaceae	201174|Actinobacteria	J	Elongation factor SelB, winged helix	selB	-	-	ko:K03833	-	-	-	-	ko00000,ko03012	-	-	-	GTP_EFTU,GTP_EFTU_D2,SelB-wing_2,SelB-wing_3
ENBDON_00136	1435356.Y013_00400	8.91e-246	682.0	COG1921@1|root,COG1921@2|Bacteria,2HFGK@201174|Actinobacteria,4G65D@85025|Nocardiaceae	201174|Actinobacteria	H	Converts seryl-tRNA(Sec) to selenocysteinyl-tRNA(Sec) required for selenoprotein biosynthesis	selA	-	2.9.1.1	ko:K01042	ko00450,ko00970,map00450,map00970	-	R08219	RC01246	ko00000,ko00001,ko01000	-	-	-	Se-cys_synth_N,SelA
ENBDON_00138	1435356.Y013_00390	7.1e-230	634.0	COG0709@1|root,COG0709@2|Bacteria,2GNP4@201174|Actinobacteria	201174|Actinobacteria	E	Synthesizes selenophosphate from selenide and ATP	selD	-	2.7.9.3	ko:K01008	ko00450,ko01100,map00450,map01100	-	R03595	RC00002,RC02878	ko00000,ko00001,ko01000,ko03016	-	-	-	AIRS,AIRS_C
ENBDON_00139	1435356.Y013_00385	9.25e-128	363.0	COG0243@1|root,COG0243@2|Bacteria,2GJ7X@201174|Actinobacteria,4G5US@85025|Nocardiaceae	201174|Actinobacteria	C	Molybdopterin oxidoreductase Fe4S4 domain	fdhA	-	1.17.1.9	ko:K00123	ko00630,ko00680,ko01100,ko01120,ko01200,map00630,map00680,map01100,map01120,map01200	-	R00519	RC02796	ko00000,ko00001,ko01000	-	-	-	Molybdop_Fe4S4
ENBDON_00140	1435356.Y013_00380	0.0	1617.0	COG0243@1|root,COG0243@2|Bacteria,2GJCK@201174|Actinobacteria,4FWT9@85025|Nocardiaceae	201174|Actinobacteria	C	Molydopterin dinucleotide binding domain	-	-	1.17.1.9	ko:K00123	ko00630,ko00680,ko01100,ko01120,ko01200,map00630,map00680,map01100,map01120,map01200	-	R00519	RC02796	ko00000,ko00001,ko01000	-	-	-	Molybdop_Fe4S4,Molybdopterin,Molydop_binding
ENBDON_00141	1435356.Y013_00375	7.32e-216	596.0	COG0437@1|root,COG0437@2|Bacteria,2I2DV@201174|Actinobacteria,4FYY1@85025|Nocardiaceae	201174|Actinobacteria	C	4Fe-4S binding domain	hybA	-	-	ko:K00124	ko00630,ko00680,ko01100,ko01120,ko01200,map00630,map00680,map01100,map01120,map01200	-	R00519	RC02796	ko00000,ko00001	-	-	-	Fer4_11,Fer4_3,Fer4_4,Fer4_7
ENBDON_00142	1435356.Y013_00370	1.28e-198	554.0	COG3301@1|root,COG3301@2|Bacteria,2GJ4S@201174|Actinobacteria,4FWQS@85025|Nocardiaceae	201174|Actinobacteria	P	Polysulphide reductase, NrfD	nrfD	-	-	-	-	-	-	-	-	-	-	-	NrfD
ENBDON_00143	1435356.Y013_00365	2.7e-267	737.0	COG2223@1|root,COG2223@2|Bacteria,2I2RR@201174|Actinobacteria,4FX2C@85025|Nocardiaceae	201174|Actinobacteria	P	Major Facilitator Superfamily	-	-	-	ko:K08177	-	-	-	-	ko00000,ko02000	2.A.1.11	-	-	MFS_1
ENBDON_00144	1429046.RR21198_2089	2.11e-132	375.0	COG1396@1|root,COG1396@2|Bacteria,2GPWH@201174|Actinobacteria,4FWPE@85025|Nocardiaceae	201174|Actinobacteria	K	Cro/C1-type HTH DNA-binding domain	-	-	-	-	-	-	-	-	-	-	-	-	Cupin_2,HTH_3,HTH_31
ENBDON_00145	1429046.RR21198_2088	0.0	949.0	COG0492@1|root,COG2227@1|root,COG0492@2|Bacteria,COG2227@2|Bacteria,2GIXN@201174|Actinobacteria,4FYCP@85025|Nocardiaceae	201174|Actinobacteria	O	pyridine nucleotide-disulfide oxidoreductase	-	-	1.8.1.9	ko:K00384	ko00450,map00450	-	R02016,R03596,R09372	RC00013,RC02518,RC02873	ko00000,ko00001,ko01000	-	-	-	Methyltransf_25,Pyr_redox_2
ENBDON_00146	1429046.RR21198_2086	0.0	2726.0	COG0507@1|root,COG1112@1|root,COG0507@2|Bacteria,COG1112@2|Bacteria,2GKJW@201174|Actinobacteria,4FY67@85025|Nocardiaceae	201174|Actinobacteria	L	AAA domain	-	-	-	-	-	-	-	-	-	-	-	-	AAA_11,AAA_12,AAA_30,DUF4011,DUF559
ENBDON_00147	1206732.BAGD01000083_gene3590	7.55e-71	235.0	COG0657@1|root,COG0657@2|Bacteria,2GTEV@201174|Actinobacteria,4FWNU@85025|Nocardiaceae	201174|Actinobacteria	I	Prolyl oligopeptidase family	-	-	3.1.1.3	ko:K01046	ko00561,ko01100,map00561,map01100	M00098	R02250,R02687	RC00020,RC00037,RC00041,RC00094	ko00000,ko00001,ko00002,ko01000	-	-	-	Abhydrolase_3
ENBDON_00149	1429046.RR21198_5464	0.0	988.0	COG1012@1|root,COG1012@2|Bacteria,2GJ95@201174|Actinobacteria,4FUQ5@85025|Nocardiaceae	201174|Actinobacteria	C	Belongs to the aldehyde dehydrogenase family	gabD2	-	1.2.1.16,1.2.1.20,1.2.1.79	ko:K00135	ko00250,ko00310,ko00350,ko00650,ko00760,ko01100,ko01120,map00250,map00310,map00350,map00650,map00760,map01100,map01120	M00027	R00713,R00714,R02401	RC00080	ko00000,ko00001,ko00002,ko01000	-	-	-	Aldedh
ENBDON_00150	1240349.ANGC01000062_gene4318	3.88e-286	785.0	COG2199@1|root,COG2199@2|Bacteria,2I9KQ@201174|Actinobacteria,4G2WQ@85025|Nocardiaceae	201174|Actinobacteria	T	diguanylate cyclase	-	-	-	-	-	-	-	-	-	-	-	-	GGDEF,PAS
ENBDON_00151	1240349.ANGC01000062_gene4317	9.34e-243	669.0	COG2843@1|root,COG2843@2|Bacteria,2GK15@201174|Actinobacteria,4FW08@85025|Nocardiaceae	201174|Actinobacteria	M	Bacterial capsule synthesis protein PGA_cap	-	-	-	ko:K07282	-	-	-	-	ko00000	-	-	-	PGA_cap
ENBDON_00152	1429046.RR21198_5467	5.81e-172	483.0	COG2343@1|root,COG2343@2|Bacteria,2IKUM@201174|Actinobacteria,4FX0U@85025|Nocardiaceae	201174|Actinobacteria	S	Domain of unknown function (DUF427)	-	-	-	-	-	-	-	-	-	-	-	-	NTP_transf_9
ENBDON_00153	1240349.ANGC01000062_gene4315	0.0	956.0	COG2072@1|root,COG2072@2|Bacteria,2GJEA@201174|Actinobacteria,4FTX4@85025|Nocardiaceae	201174|Actinobacteria	P	Flavin-binding monooxygenase-like	-	-	1.14.13.22	ko:K03379	ko00930,ko01120,ko01220,map00930,map01120,map01220	-	R02231,R06622	RC00662,RC01550	ko00000,ko00001,ko01000	-	-	-	FMO-like,Pyr_redox_3
ENBDON_00154	1240349.ANGC01000062_gene4314	2.31e-125	358.0	COG1309@1|root,COG1309@2|Bacteria,2GQPK@201174|Actinobacteria,4FZ4D@85025|Nocardiaceae	201174|Actinobacteria	K	Bacterial regulatory proteins, tetR family	-	-	-	-	-	-	-	-	-	-	-	-	TetR_C_6,TetR_N
ENBDON_00155	1240349.ANGC01000062_gene4313	1.02e-70	212.0	2E7BZ@1|root,331V9@2|Bacteria,2GQHG@201174|Actinobacteria,4G2DY@85025|Nocardiaceae	201174|Actinobacteria	S	Domain of Unknown Function (DUF1540)	-	-	-	-	-	-	-	-	-	-	-	-	DUF1540
ENBDON_00156	101510.RHA1_ro05096	1.42e-243	681.0	COG0477@1|root,COG2814@2|Bacteria,2H8UD@201174|Actinobacteria,4FV1Y@85025|Nocardiaceae	201174|Actinobacteria	EGP	Major Facilitator Superfamily	-	-	-	-	-	-	-	-	-	-	-	-	CarboxypepD_reg,MFS_1,Sugar_tr
ENBDON_00157	29306.JOBE01000010_gene7215	4.07e-72	221.0	COG1846@1|root,COG1846@2|Bacteria,2HGXY@201174|Actinobacteria	201174|Actinobacteria	K	transcriptional	-	-	-	-	-	-	-	-	-	-	-	-	MarR
ENBDON_00158	1240349.ANGC01000062_gene4312	8.36e-138	390.0	COG1309@1|root,COG1309@2|Bacteria,2ISSA@201174|Actinobacteria,4FXNC@85025|Nocardiaceae	201174|Actinobacteria	K	Bacterial regulatory proteins, tetR family	-	-	-	ko:K21961	-	-	-	-	ko00000,ko03000	-	-	-	TetR_N
ENBDON_00159	1429046.RR21198_5474	0.0	1889.0	COG0439@1|root,COG4799@1|root,COG0439@2|Bacteria,COG4799@2|Bacteria,2I2S0@201174|Actinobacteria,4FUPR@85025|Nocardiaceae	201174|Actinobacteria	I	Biotin carboxylase C-terminal domain	accA3_1	-	-	-	-	-	-	-	-	-	-	-	Biotin_carb_C,Biotin_carb_N,Biotin_lipoyl,CPSase_L_D2,Carboxyl_trans
ENBDON_00160	1240349.ANGC01000056_gene4015	1.27e-139	395.0	COG1573@1|root,COG1573@2|Bacteria,2GMPT@201174|Actinobacteria,4FUXC@85025|Nocardiaceae	201174|Actinobacteria	L	Uracil DNA glycosylase superfamily	dpo	-	3.2.2.27	ko:K21929	ko03410,map03410	-	-	-	ko00000,ko00001,ko01000,ko03400	-	-	-	UDG
ENBDON_00161	1206726.BAFV01000046_gene3226	2.35e-188	538.0	COG0477@1|root,COG0477@2|Bacteria,2GIYR@201174|Actinobacteria,4FZ6H@85025|Nocardiaceae	201174|Actinobacteria	EGP	Sugar (and other) transporter	-	-	-	ko:K08172	-	-	-	-	ko00000,ko02000	2.A.1.6.6	-	-	MFS_1,Sugar_tr
ENBDON_00162	1206720.BAFQ01000094_gene2460	3.68e-150	430.0	COG0451@1|root,COG0451@2|Bacteria,2GMU4@201174|Actinobacteria,4FYVS@85025|Nocardiaceae	201174|Actinobacteria	GM	NAD(P)H-binding	-	-	-	-	-	-	-	-	-	-	-	-	Epimerase,NAD_binding_10
ENBDON_00163	1278078.G419_02845	3.23e-143	409.0	COG1028@1|root,COG1028@2|Bacteria,2HVB4@201174|Actinobacteria,4G8J6@85025|Nocardiaceae	201174|Actinobacteria	IQ	Enoyl-(Acyl carrier protein) reductase	-	-	-	-	-	-	-	-	-	-	-	-	adh_short_C2
ENBDON_00164	1206726.BAFV01000046_gene3229	3.66e-78	243.0	COG1414@1|root,COG1414@2|Bacteria,2HGKU@201174|Actinobacteria,4G6MQ@85025|Nocardiaceae	201174|Actinobacteria	K	helix_turn_helix isocitrate lyase regulation	-	-	-	-	-	-	-	-	-	-	-	-	HTH_IclR
ENBDON_00165	1240349.ANGC01000056_gene4016	0.0	1000.0	COG4425@1|root,COG4425@2|Bacteria,2GKB5@201174|Actinobacteria,4FVRH@85025|Nocardiaceae	201174|Actinobacteria	S	Alpha/beta-hydrolase family N-terminus	-	-	-	-	-	-	-	-	-	-	-	-	Abhydrolase_9,Abhydrolase_9_N
ENBDON_00166	1240349.ANGC01000056_gene4017	2.12e-11	60.8	2AY0M@1|root,31Q26@2|Bacteria,2IMBI@201174|Actinobacteria,4G2SP@85025|Nocardiaceae	201174|Actinobacteria	S	Phospholipase_D-nuclease N-terminal	-	-	-	-	-	-	-	-	-	-	-	-	PLDc_N,SHOCT
ENBDON_00167	1429046.RR21198_5479	8.65e-144	409.0	2CYFR@1|root,32T44@2|Bacteria,2HSE6@201174|Actinobacteria,4G6DE@85025|Nocardiaceae	201174|Actinobacteria	S	Protein of unknown function (DUF998)	-	-	-	-	-	-	-	-	-	-	-	-	DUF998
ENBDON_00168	1429046.RR21198_5480	4.83e-139	396.0	COG0834@1|root,COG0834@2|Bacteria,2IA7Y@201174|Actinobacteria,4G066@85025|Nocardiaceae	201174|Actinobacteria	ET	Belongs to the bacterial solute-binding protein 3 family	-	-	-	-	-	-	-	-	-	-	-	-	SBP_bac_3
ENBDON_00169	1240349.ANGC01000056_gene4021	1.01e-189	531.0	COG1276@1|root,COG1276@2|Bacteria,2I8IV@201174|Actinobacteria,4FWW8@85025|Nocardiaceae	201174|Actinobacteria	P	Copper resistance protein D	-	-	-	ko:K07245	-	-	-	-	ko00000,ko02000	9.B.62.1	-	-	CopD
ENBDON_00170	1240349.ANGC01000056_gene4022	5.6e-112	324.0	COG2372@1|root,COG2372@2|Bacteria,2GMKG@201174|Actinobacteria,4FYGB@85025|Nocardiaceae	201174|Actinobacteria	S	CopC domain	-	-	-	ko:K07156,ko:K14166	-	-	-	-	ko00000,ko02000	9.B.62.2	-	-	CopC
ENBDON_00171	1240349.ANGC01000056_gene4023	2.81e-88	261.0	2EN12@1|root,33FP8@2|Bacteria,2II3P@201174|Actinobacteria	201174|Actinobacteria	-	-	-	-	-	-	-	-	-	-	-	-	-	-	-
ENBDON_00172	1240349.ANGC01000056_gene4024	8.11e-114	331.0	2E45H@1|root,32Z1I@2|Bacteria,2GN4U@201174|Actinobacteria,4FV5X@85025|Nocardiaceae	201174|Actinobacteria	-	-	-	-	-	-	-	-	-	-	-	-	-	-	-
ENBDON_00173	1240349.ANGC01000056_gene4025	0.0	1078.0	COG2251@1|root,COG2251@2|Bacteria,2HF5B@201174|Actinobacteria,4FWQT@85025|Nocardiaceae	201174|Actinobacteria	S	RNase_H superfamily	-	-	-	-	-	-	-	-	-	-	-	-	RNase_H_2
ENBDON_00174	1240349.ANGC01000056_gene4026	9.33e-183	509.0	COG1073@1|root,COG1073@2|Bacteria,2I9HJ@201174|Actinobacteria,4FWIG@85025|Nocardiaceae	201174|Actinobacteria	S	Serine aminopeptidase, S33	-	GO:0005575,GO:0005618,GO:0005623,GO:0008150,GO:0009605,GO:0009607,GO:0030312,GO:0035821,GO:0043207,GO:0044003,GO:0044403,GO:0044419,GO:0044464,GO:0050896,GO:0051701,GO:0051704,GO:0051707,GO:0051817,GO:0052031,GO:0052173,GO:0052200,GO:0052255,GO:0052552,GO:0052553,GO:0052561,GO:0052562,GO:0052564,GO:0052572,GO:0071944,GO:0075136	-	ko:K06889	-	-	-	-	ko00000	-	-	-	Hydrolase_4
ENBDON_00175	1240349.ANGC01000056_gene4027	2.66e-171	479.0	COG1028@1|root,COG1028@2|Bacteria,2GNUM@201174|Actinobacteria,4FU2V@85025|Nocardiaceae	201174|Actinobacteria	IQ	Belongs to the short-chain dehydrogenases reductases (SDR) family	HSD17B	-	-	-	-	-	-	-	-	-	-	-	adh_short,adh_short_C2
ENBDON_00176	1240349.ANGC01000056_gene4029	3.6e-254	701.0	COG0477@1|root,COG2814@2|Bacteria,2I2EY@201174|Actinobacteria,4G9I9@85025|Nocardiaceae	201174|Actinobacteria	EGP	Transmembrane secretion effector	-	-	-	-	-	-	-	-	-	-	-	-	MFS_3
ENBDON_00177	1429046.RR21198_4318	2.69e-101	295.0	COG1846@1|root,COG1846@2|Bacteria,2IH3H@201174|Actinobacteria,4G2VK@85025|Nocardiaceae	201174|Actinobacteria	K	helix_turn_helix multiple antibiotic resistance protein	-	-	-	-	-	-	-	-	-	-	-	-	MarR,MarR_2
ENBDON_00178	1240349.ANGC01000056_gene4031	4.53e-148	419.0	COG2119@1|root,COG2119@2|Bacteria,2GNR0@201174|Actinobacteria,4FXM7@85025|Nocardiaceae	201174|Actinobacteria	S	Uncharacterized protein family UPF0016	-	-	-	-	-	-	-	-	-	-	-	-	UPF0016
ENBDON_00179	1240349.ANGC01000056_gene4032	4.87e-123	350.0	2AXA6@1|root,31P99@2|Bacteria,2GNHB@201174|Actinobacteria,4FV0M@85025|Nocardiaceae	201174|Actinobacteria	-	-	-	-	-	-	-	-	-	-	-	-	-	-	-
ENBDON_00180	1240349.ANGC01000056_gene4033	1.2e-150	423.0	COG0605@1|root,COG0605@2|Bacteria,2GJV8@201174|Actinobacteria,4FX0I@85025|Nocardiaceae	201174|Actinobacteria	P	Destroys radicals which are normally produced within the cells and which are toxic to biological systems	sodA	-	1.15.1.1	ko:K04564	ko04013,ko04068,ko04146,ko04211,ko04212,ko04213,ko05016,map04013,map04068,map04146,map04211,map04212,map04213,map05016	-	-	-	ko00000,ko00001,ko01000	-	-	-	Sod_Fe_C,Sod_Fe_N
ENBDON_00181	1240349.ANGC01000056_gene4034	2.33e-245	676.0	COG1835@1|root,COG1835@2|Bacteria,2HHA5@201174|Actinobacteria,4FWBQ@85025|Nocardiaceae	201174|Actinobacteria	I	Acyltransferase family	-	-	-	-	-	-	-	-	-	-	-	-	Acyl_transf_3
ENBDON_00182	1429046.RR21198_4313	4.88e-162	453.0	COG0225@1|root,COG0225@2|Bacteria,2GJ1S@201174|Actinobacteria,4FXDF@85025|Nocardiaceae	201174|Actinobacteria	O	Has an important function as a repair enzyme for proteins that have been inactivated by oxidation. Catalyzes the reversible oxidation-reduction of methionine sulfoxide in proteins to methionine	msrA	-	1.8.4.11	ko:K07304	-	-	-	-	ko00000,ko01000	-	-	-	PMSR
ENBDON_00183	1240349.ANGC01000056_gene4036	3.26e-121	348.0	2E3P4@1|root,32YM7@2|Bacteria,2HI2T@201174|Actinobacteria,4G2GH@85025|Nocardiaceae	201174|Actinobacteria	-	-	-	-	-	-	-	-	-	-	-	-	-	-	-
ENBDON_00184	1240349.ANGC01000056_gene4037	1.8e-218	603.0	COG2141@1|root,COG2141@2|Bacteria,2GJ6T@201174|Actinobacteria,4FWP1@85025|Nocardiaceae	201174|Actinobacteria	C	Luciferase-like monooxygenase	-	-	1.14.14.5	ko:K04091	ko00920,map00920	-	R07210,R10206	RC01779,RC02556	ko00000,ko00001,ko01000	-	-	-	Bac_luciferase
ENBDON_00185	1240349.ANGC01000056_gene4038	2.62e-71	214.0	COG0607@1|root,COG0607@2|Bacteria,2IQIP@201174|Actinobacteria,4G2HV@85025|Nocardiaceae	201174|Actinobacteria	P	Rhodanese Homology Domain	glpE	-	-	-	-	-	-	-	-	-	-	-	Rhodanese
ENBDON_00186	1240349.ANGC01000056_gene4039	4.42e-222	613.0	COG3170@1|root,COG3170@2|Bacteria,2GKZS@201174|Actinobacteria,4FVE7@85025|Nocardiaceae	201174|Actinobacteria	NU	Domain of unknown function (DUF4328)	-	-	-	-	-	-	-	-	-	-	-	-	DUF4328
ENBDON_00187	1240349.ANGC01000056_gene4040	2.03e-176	492.0	COG0584@1|root,COG0584@2|Bacteria,2GMMS@201174|Actinobacteria,4FUY3@85025|Nocardiaceae	201174|Actinobacteria	C	Glycerophosphoryl diester phosphodiesterase family	glpQ	-	3.1.4.46	ko:K01126	ko00564,map00564	-	R01030,R01470	RC00017,RC00425	ko00000,ko00001,ko01000	-	-	-	GDPD
ENBDON_00188	1240349.ANGC01000056_gene4041	1.16e-210	583.0	COG3012@1|root,COG3012@2|Bacteria,2GJ7F@201174|Actinobacteria,4FUDZ@85025|Nocardiaceae	201174|Actinobacteria	S	SEC-C motif	-	-	-	-	-	-	-	-	-	-	-	-	SEC-C
ENBDON_00189	1429046.RR21198_4306	3.73e-214	593.0	COG1316@1|root,COG1316@2|Bacteria,2GJJJ@201174|Actinobacteria,4FWVM@85025|Nocardiaceae	201174|Actinobacteria	K	Cell envelope-related transcriptional attenuator domain	lytR2	-	-	-	-	-	-	-	-	-	-	-	LytR_cpsA_psr
ENBDON_00190	1240349.ANGC01000033_gene3025	3.14e-185	515.0	COG1266@1|root,COG1266@2|Bacteria,2GK11@201174|Actinobacteria,4FUIZ@85025|Nocardiaceae	201174|Actinobacteria	S	CAAX protease self-immunity	-	-	-	ko:K07052	-	-	-	-	ko00000	-	-	-	Abi
ENBDON_00191	1240349.ANGC01000033_gene3024	1.14e-44	145.0	2EAZS@1|root,3350M@2|Bacteria,2GS4Z@201174|Actinobacteria,4G4GN@85025|Nocardiaceae	201174|Actinobacteria	-	-	-	-	-	-	-	-	-	-	-	-	-	-	Transgly_assoc
ENBDON_00192	1240349.ANGC01000033_gene3023	0.0	1655.0	COG0515@1|root,COG3055@1|root,COG0515@2|Bacteria,COG3055@2|Bacteria,2HEN9@201174|Actinobacteria,4FVW7@85025|Nocardiaceae	201174|Actinobacteria	KLT	Galactose oxidase, central domain	-	-	2.7.11.1	ko:K08282	-	-	-	-	ko00000,ko01000	-	-	-	Kelch_1,Pkinase
ENBDON_00193	1240349.ANGC01000033_gene3022	1.23e-156	442.0	2E6J0@1|root,33163@2|Bacteria,2HEIF@201174|Actinobacteria,4FUHF@85025|Nocardiaceae	201174|Actinobacteria	S	Protein of unknown function (DUF2470)	-	-	-	-	-	-	-	-	-	-	-	-	DUF2470
ENBDON_00194	1240349.ANGC01000033_gene3021	4.23e-134	383.0	2APRE@1|root,31EV9@2|Bacteria,2H94Y@201174|Actinobacteria,4G3EJ@85025|Nocardiaceae	201174|Actinobacteria	-	-	-	-	-	-	-	-	-	-	-	-	-	-	-
ENBDON_00195	1429046.RR21198_1956	1.14e-204	568.0	COG0077@1|root,COG0077@2|Bacteria,2GJQ5@201174|Actinobacteria,4FVEM@85025|Nocardiaceae	201174|Actinobacteria	E	Prephenate dehydratase	pheA	GO:0003674,GO:0003824,GO:0004664,GO:0005488,GO:0005515,GO:0005575,GO:0005622,GO:0005623,GO:0005737,GO:0006082,GO:0006520,GO:0006558,GO:0006725,GO:0006807,GO:0008150,GO:0008152,GO:0008652,GO:0009058,GO:0009072,GO:0009073,GO:0009094,GO:0009095,GO:0009987,GO:0016053,GO:0016597,GO:0016829,GO:0016835,GO:0016836,GO:0017144,GO:0019438,GO:0019752,GO:0031406,GO:0033585,GO:0036094,GO:0042802,GO:0042803,GO:…	4.2.1.51	ko:K04518	ko00400,ko01100,ko01110,ko01130,ko01230,map00400,map01100,map01110,map01130,map01230	M00024	R00691,R01373	RC00360	ko00000,ko00001,ko00002,ko01000	-	-	-	ACT,PDT
ENBDON_00196	1240349.ANGC01000033_gene3019	1.83e-146	413.0	COG0406@1|root,COG0406@2|Bacteria,2IHUQ@201174|Actinobacteria,4G905@85025|Nocardiaceae	201174|Actinobacteria	G	Belongs to the phosphoglycerate mutase family	-	-	-	-	-	-	-	-	-	-	-	-	His_Phos_1
ENBDON_00197	1240349.ANGC01000033_gene3018	3.04e-148	417.0	COG1309@1|root,COG1309@2|Bacteria,2GMNZ@201174|Actinobacteria,4FYPB@85025|Nocardiaceae	201174|Actinobacteria	K	transcriptional regulator	-	-	-	-	-	-	-	-	-	-	-	-	TetR_N
ENBDON_00198	1240349.ANGC01000033_gene3017	2.31e-163	459.0	COG1024@1|root,COG1024@2|Bacteria,2GJDK@201174|Actinobacteria,4FXP9@85025|Nocardiaceae	201174|Actinobacteria	I	enoyl-CoA hydratase	echA10	-	4.2.1.17	ko:K01692	ko00071,ko00280,ko00281,ko00310,ko00360,ko00362,ko00380,ko00410,ko00627,ko00640,ko00650,ko00903,ko00930,ko01100,ko01110,ko01120,ko01130,ko01212,map00071,map00280,map00281,map00310,map00360,map00362,map00380,map00410,map00627,map00640,map00650,map00903,map00930,map01100,map01110,map01120,map01130,map01212	M00032,M00087	R03026,R03045,R04137,R04170,R04204,R04224,R04738,R04740,R04744,R04746,R04749,R05595,R06411,R06412,R06942,R08093	RC00831,RC00834,RC01086,RC01095,RC01098,RC01103,RC01217,RC02115	ko00000,ko00001,ko00002,ko01000	-	-	-	ECH_1
ENBDON_00199	1240349.ANGC01000033_gene3016	1.46e-213	592.0	COG0604@1|root,COG0604@2|Bacteria,2GK7Y@201174|Actinobacteria,4FVC5@85025|Nocardiaceae	201174|Actinobacteria	C	NADPH quinone	-	-	1.6.5.5	ko:K00344	-	-	-	-	ko00000,ko01000	-	-	-	ADH_N,ADH_zinc_N
ENBDON_00200	1240349.ANGC01000033_gene3015	7.53e-172	481.0	COG1024@1|root,COG1024@2|Bacteria,2GKJ6@201174|Actinobacteria,4FVC7@85025|Nocardiaceae	201174|Actinobacteria	I	Belongs to the enoyl-CoA hydratase isomerase family	-	-	4.2.1.149,4.2.1.17	ko:K01692,ko:K08299	ko00071,ko00280,ko00281,ko00310,ko00360,ko00362,ko00380,ko00410,ko00627,ko00640,ko00650,ko00903,ko00930,ko01100,ko01110,ko01120,ko01130,ko01212,map00071,map00280,map00281,map00310,map00360,map00362,map00380,map00410,map00627,map00640,map00650,map00903,map00930,map01100,map01110,map01120,map01130,map01212	M00032,M00087	R03026,R03045,R04137,R04170,R04204,R04224,R04738,R04740,R04744,R04746,R04749,R05595,R06411,R06412,R06942,R08093,R10675	RC00831,RC00834,RC01086,RC01095,RC01098,RC01103,RC01217,RC02115	ko00000,ko00001,ko00002,ko01000	-	-	-	ECH_1
ENBDON_00201	1240349.ANGC01000033_gene3014	8.34e-276	755.0	COG0183@1|root,COG0183@2|Bacteria,2GJAC@201174|Actinobacteria,4FVYV@85025|Nocardiaceae	201174|Actinobacteria	I	Belongs to the thiolase family	-	-	2.3.1.16,2.3.1.9	ko:K00626,ko:K00632	ko00071,ko00072,ko00280,ko00281,ko00310,ko00362,ko00380,ko00592,ko00620,ko00630,ko00640,ko00642,ko00650,ko00720,ko00900,ko01100,ko01110,ko01120,ko01130,ko01200,ko01212,ko02020,map00071,map00072,map00280,map00281,map00310,map00362,map00380,map00592,map00620,map00630,map00640,map00642,map00650,map00720,map00900,map01100,map01110,map01120,map01130,map01200,map01212,map02020	M00087,M00088,M00095,M00113,M00373,M00374,M00375	R00238,R00829,R00927,R01177,R03778,R03858,R03991,R04546,R04742,R04747,R05506,R05586,R07891,R07895,R07899,R08091,R08095	RC00004,RC00326,RC00405,RC01702,RC02728,RC02898,RC02955	ko00000,ko00001,ko00002,ko01000,ko04147	-	-	-	Thiolase_C,Thiolase_N
ENBDON_00202	1240349.ANGC01000033_gene3013	3.47e-166	466.0	COG1028@1|root,COG1028@2|Bacteria,2GNUM@201174|Actinobacteria,4FUNJ@85025|Nocardiaceae	201174|Actinobacteria	IQ	Belongs to the short-chain dehydrogenases reductases (SDR) family	-	-	-	-	-	-	-	-	-	-	-	-	adh_short
ENBDON_00203	1240349.ANGC01000033_gene3012	1.1e-134	383.0	COG1309@1|root,COG1309@2|Bacteria,2GMNZ@201174|Actinobacteria,4FYS8@85025|Nocardiaceae	201174|Actinobacteria	K	Transcriptional regulator	-	-	-	-	-	-	-	-	-	-	-	-	TetR_N
ENBDON_00204	1240349.ANGC01000033_gene3011	1.09e-274	751.0	COG1960@1|root,COG1960@2|Bacteria,2GM3V@201174|Actinobacteria,4FVPU@85025|Nocardiaceae	201174|Actinobacteria	I	acyl-CoA dehydrogenase	-	-	1.3.8.7,1.3.8.8	ko:K00249,ko:K00255	ko00071,ko00280,ko00410,ko00640,ko01100,ko01110,ko01130,ko01200,ko01212,ko03320,map00071,map00280,map00410,map00640,map01100,map01110,map01130,map01200,map01212,map03320	M00013,M00036,M00087	R00924,R01175,R01279,R02661,R03172,R03777,R03857,R03990,R04095,R04432,R04751,R04754	RC00052,RC00068,RC00076,RC00095,RC00148,RC00246	ko00000,ko00001,ko00002,ko01000	-	-	-	Acyl-CoA_dh_1,Acyl-CoA_dh_M,Acyl-CoA_dh_N
ENBDON_00205	1240349.ANGC01000033_gene3010	2.08e-162	456.0	COG1028@1|root,COG1028@2|Bacteria,2GNM4@201174|Actinobacteria,4G8QX@85025|Nocardiaceae	201174|Actinobacteria	IQ	KR domain	-	-	-	-	-	-	-	-	-	-	-	-	adh_short_C2
ENBDON_00206	1240349.ANGC01000033_gene3009	5.01e-62	190.0	COG1359@1|root,COG1359@2|Bacteria,2IM9D@201174|Actinobacteria,4G43Y@85025|Nocardiaceae	201174|Actinobacteria	S	Antibiotic biosynthesis monooxygenase	-	-	-	-	-	-	-	-	-	-	-	-	ABM
ENBDON_00207	1240349.ANGC01000033_gene3008	4.43e-28	101.0	2AQZ4@1|root,31G7V@2|Bacteria,2HJXG@201174|Actinobacteria,4G7JF@85025|Nocardiaceae	201174|Actinobacteria	-	-	-	-	-	-	-	-	-	-	-	-	-	-	-
ENBDON_00208	1240349.ANGC01000033_gene3007	3.32e-241	664.0	COG0189@1|root,COG0189@2|Bacteria,2HJ9E@201174|Actinobacteria,4G5YD@85025|Nocardiaceae	201174|Actinobacteria	HJ	ligase activity	-	-	-	-	-	-	-	-	-	-	-	-	-
ENBDON_00209	1240349.ANGC01000033_gene3006	2.7e-256	702.0	COG0778@1|root,COG0778@2|Bacteria,2I97S@201174|Actinobacteria,4FXGG@85025|Nocardiaceae	201174|Actinobacteria	C	Nitroreductase family	-	-	-	-	-	-	-	-	-	-	-	-	Nitroreductase
ENBDON_00210	1240349.ANGC01000033_gene3005	6.18e-261	721.0	COG0477@1|root,COG2814@2|Bacteria,2I8QF@201174|Actinobacteria,4FWJT@85025|Nocardiaceae	201174|Actinobacteria	EGP	Transmembrane secretion effector	-	-	-	-	-	-	-	-	-	-	-	-	MFS_1,MFS_3
ENBDON_00211	1240349.ANGC01000033_gene3004	1.08e-221	612.0	COG2070@1|root,COG2070@2|Bacteria,2I9W4@201174|Actinobacteria,4FYA2@85025|Nocardiaceae	201174|Actinobacteria	S	2-nitropropane dioxygenase	-	-	1.13.12.16	ko:K00459	ko00910,map00910	-	R00025	RC02541,RC02759	ko00000,ko00001,ko01000	-	-	-	NMO
ENBDON_00212	1240349.ANGC01000033_gene3003	2.19e-87	257.0	COG3631@1|root,COG3631@2|Bacteria,2IHRM@201174|Actinobacteria,4G1AP@85025|Nocardiaceae	201174|Actinobacteria	S	SnoaL-like domain	-	-	-	-	-	-	-	-	-	-	-	-	SnoaL_2
ENBDON_00213	1240349.ANGC01000033_gene3002	4.34e-203	562.0	COG1024@1|root,COG1024@2|Bacteria,2HEIS@201174|Actinobacteria,4FWC0@85025|Nocardiaceae	201174|Actinobacteria	I	enoyl-CoA hydratase	-	-	-	-	-	-	-	-	-	-	-	-	ECH_1
ENBDON_00214	1240349.ANGC01000033_gene3001	2.4e-54	169.0	2B0SB@1|root,31T4P@2|Bacteria,2H98Z@201174|Actinobacteria,4G33H@85025|Nocardiaceae	201174|Actinobacteria	S	Transcription factor WhiB	-	-	-	ko:K18955	-	-	-	-	ko00000,ko03000	-	-	-	Whib
ENBDON_00215	1429046.RR21198_1976	3.1e-169	474.0	COG1024@1|root,COG1024@2|Bacteria,2GKJ6@201174|Actinobacteria,4FU2F@85025|Nocardiaceae	201174|Actinobacteria	I	Belongs to the enoyl-CoA hydratase isomerase family	-	-	4.2.1.149,4.2.1.17	ko:K01692,ko:K08299	ko00071,ko00280,ko00281,ko00310,ko00360,ko00362,ko00380,ko00410,ko00627,ko00640,ko00650,ko00903,ko00930,ko01100,ko01110,ko01120,ko01130,ko01212,map00071,map00280,map00281,map00310,map00360,map00362,map00380,map00410,map00627,map00640,map00650,map00903,map00930,map01100,map01110,map01120,map01130,map01212	M00032,M00087	R03026,R03045,R04137,R04170,R04204,R04224,R04738,R04740,R04744,R04746,R04749,R05595,R06411,R06412,R06942,R08093,R10675	RC00831,RC00834,RC01086,RC01095,RC01098,RC01103,RC01217,RC02115	ko00000,ko00001,ko00002,ko01000	-	-	-	ECH_1
ENBDON_00216	1240349.ANGC01000033_gene2998	9.87e-50	163.0	2CXR2@1|root,32T2F@2|Bacteria,2I2M0@201174|Actinobacteria,4G1R1@85025|Nocardiaceae	201174|Actinobacteria	-	-	-	-	-	-	-	-	-	-	-	-	-	-	-
ENBDON_00217	1240349.ANGC01000033_gene2997	3.34e-83	246.0	2D19V@1|root,32TA6@2|Bacteria,2IRPX@201174|Actinobacteria,4G2GB@85025|Nocardiaceae	201174|Actinobacteria	-	-	-	-	-	-	-	-	-	-	-	-	-	-	-
ENBDON_00218	1429046.RR21198_1980	2.41e-100	293.0	2CK3K@1|root,32SBH@2|Bacteria,2IQJH@201174|Actinobacteria,4G23H@85025|Nocardiaceae	201174|Actinobacteria	S	Ion channel	-	-	-	-	-	-	-	-	-	-	-	-	Ion_trans_2
ENBDON_00219	1429046.RR21198_1981	1.76e-315	862.0	COG4320@1|root,COG4320@2|Bacteria,2GKEK@201174|Actinobacteria,4FU00@85025|Nocardiaceae	201174|Actinobacteria	S	Uncharacterized protein conserved in bacteria (DUF2252)	-	-	-	-	-	-	-	-	-	-	-	-	DUF2252
ENBDON_00220	1429046.RR21198_1982	1.33e-48	155.0	2EKEP@1|root,33E4V@2|Bacteria,2GTD8@201174|Actinobacteria,4G46C@85025|Nocardiaceae	201174|Actinobacteria	-	-	-	-	-	-	-	-	-	-	-	-	-	-	-
ENBDON_00221	1429046.RR21198_1983	6.3e-94	275.0	COG4803@1|root,COG4803@2|Bacteria,2IIN1@201174|Actinobacteria,4GA0C@85025|Nocardiaceae	201174|Actinobacteria	S	membrane protein of uknown function UCP014873	-	-	-	-	-	-	-	-	-	-	-	-	-
ENBDON_00222	1429046.RR21198_1984	4.27e-260	717.0	COG0025@1|root,COG0025@2|Bacteria,2I37Q@201174|Actinobacteria,4G023@85025|Nocardiaceae	201174|Actinobacteria	P	Sodium/hydrogen exchanger family	-	-	-	-	-	-	-	-	-	-	-	-	Na_H_Exchanger
ENBDON_00223	1429046.RR21198_1985	0.0	1570.0	COG3119@1|root,COG3119@2|Bacteria,2GJ8H@201174|Actinobacteria,4FURR@85025|Nocardiaceae	201174|Actinobacteria	P	Arylsulfatase	-	-	3.1.6.1	ko:K01130	ko00140,ko00600,map00140,map00600	-	R03980,R04856	RC00128,RC00231	ko00000,ko00001,ko01000	-	-	-	Sulfatase
ENBDON_00224	1240349.ANGC01000033_gene2990	2.51e-84	249.0	2AY0M@1|root,31Q26@2|Bacteria,2IMBI@201174|Actinobacteria,4G24E@85025|Nocardiaceae	201174|Actinobacteria	S	Phospholipase_D-nuclease N-terminal	-	-	-	-	-	-	-	-	-	-	-	-	PLDc_N,SHOCT
ENBDON_00225	1429046.RR21198_1989	3.19e-120	346.0	2E3P4@1|root,32YM7@2|Bacteria	2|Bacteria	-	-	-	-	-	-	-	-	-	-	-	-	-	-	-
ENBDON_00226	1429046.RR21198_1990	6.12e-38	127.0	2AR02@1|root,31G8V@2|Bacteria,2HJYA@201174|Actinobacteria,4G7KP@85025|Nocardiaceae	201174|Actinobacteria	-	-	-	-	-	-	-	-	-	-	-	-	-	-	-
ENBDON_00227	1240349.ANGC01000033_gene2985	2.35e-73	223.0	2D19V@1|root,32TA6@2|Bacteria,2IRPX@201174|Actinobacteria,4G2GB@85025|Nocardiaceae	201174|Actinobacteria	-	-	-	-	-	-	-	-	-	-	-	-	-	-	-
ENBDON_00228	1429046.RR21198_1991	4.79e-284	784.0	28MY8@1|root,2ZB54@2|Bacteria,2GMYY@201174|Actinobacteria,4FVJJ@85025|Nocardiaceae	201174|Actinobacteria	-	-	-	-	-	-	-	-	-	-	-	-	-	-	-
ENBDON_00229	1429046.RR21198_1992	2.67e-292	801.0	COG1597@1|root,COG1597@2|Bacteria,2GNNM@201174|Actinobacteria,4FUW2@85025|Nocardiaceae	201174|Actinobacteria	I	Protein involved in diacylglycerol kinase activity and protein kinase C activation	-	-	-	-	-	-	-	-	-	-	-	-	DAGK_cat
ENBDON_00230	1240349.ANGC01000033_gene2982	0.0	946.0	COG0477@1|root,COG0477@2|Bacteria,2GITS@201174|Actinobacteria,4FXZ9@85025|Nocardiaceae	201174|Actinobacteria	EGP	major facilitator superfamily	-	-	-	-	-	-	-	-	-	-	-	-	MFS_1
ENBDON_00231	1240349.ANGC01000033_gene2981	2.43e-201	556.0	COG0121@1|root,COG0121@2|Bacteria,2GXCD@201174|Actinobacteria,4G6BN@85025|Nocardiaceae	201174|Actinobacteria	S	Glutamine amidotransferases class-II	-	-	-	-	-	-	-	-	-	-	-	-	GATase_4,GATase_6
ENBDON_00232	1429046.RR21198_5714	4.27e-223	623.0	COG2141@1|root,COG2141@2|Bacteria,2GJRF@201174|Actinobacteria,4FXZQ@85025|Nocardiaceae	201174|Actinobacteria	C	Luciferase-like monooxygenase	-	-	-	ko:K14728	-	-	-	-	ko00000,ko01000	-	-	-	Bac_luciferase
ENBDON_00233	1240349.ANGC01000033_gene2980	5.7e-160	450.0	COG1028@1|root,COG1028@2|Bacteria,2GJGM@201174|Actinobacteria,4FYCV@85025|Nocardiaceae	201174|Actinobacteria	IQ	KR domain	-	-	1.1.1.53	ko:K00038	ko00140,ko01100,map00140,map01100	-	R04831,R04834,R04844,R04847	RC00139,RC01219,RC01220	ko00000,ko00001,ko01000	-	-	-	adh_short,adh_short_C2
ENBDON_00234	1240349.ANGC01000033_gene2979	4.45e-164	464.0	COG0330@1|root,COG0330@2|Bacteria,2GKFP@201174|Actinobacteria,4FYEC@85025|Nocardiaceae	201174|Actinobacteria	O	prohibitin homologues	-	-	-	-	-	-	-	-	-	-	-	-	Band_7
ENBDON_00235	1240349.ANGC01000033_gene2978	1.7e-69	211.0	COG0695@1|root,COG0695@2|Bacteria,2IIMP@201174|Actinobacteria,4G3KV@85025|Nocardiaceae	201174|Actinobacteria	O	Glutaredoxin	-	-	1.20.4.3	ko:K18917	-	-	-	-	ko00000,ko01000	-	-	-	Glutaredoxin
ENBDON_00236	1240349.ANGC01000033_gene2977	1.1e-143	405.0	COG2227@1|root,COG2227@2|Bacteria,2H9ND@201174|Actinobacteria,4G0SR@85025|Nocardiaceae	201174|Actinobacteria	H	Thiopurine S-methyltransferase (TPMT)	-	-	-	-	-	-	-	-	-	-	-	-	Methyltransf_23,Methyltransf_25
ENBDON_00237	1240349.ANGC01000133_gene4284	3.71e-64	196.0	COG1937@1|root,COG1937@2|Bacteria,2IQ7U@201174|Actinobacteria,4G72B@85025|Nocardiaceae	201174|Actinobacteria	S	Metal-sensitive transcriptional repressor	-	-	-	-	-	-	-	-	-	-	-	-	Trns_repr_metal
ENBDON_00238	1193181.BN10_1010013	4.06e-47	172.0	COG0607@1|root,COG0607@2|Bacteria,2GR81@201174|Actinobacteria,4FHT9@85021|Intrasporangiaceae	201174|Actinobacteria	P	Rhodanese Homology Domain	-	-	-	-	-	-	-	-	-	-	-	-	Rhodanese
ENBDON_00239	1240349.ANGC01000117_gene2972	2.65e-91	275.0	COG0491@1|root,COG0607@1|root,COG0491@2|Bacteria,COG0607@2|Bacteria,2GN50@201174|Actinobacteria,4FU1R@85025|Nocardiaceae	201174|Actinobacteria	P	Metallo-beta-lactamase superfamily	-	-	-	-	-	-	-	-	-	-	-	-	Lactamase_B,Rhodanese
ENBDON_00240	1240349.ANGC01000022_gene3416	5.03e-181	504.0	COG2050@1|root,COG2050@2|Bacteria,2HMKZ@201174|Actinobacteria,4FU6N@85025|Nocardiaceae	201174|Actinobacteria	Q	Thioesterase-like superfamily	-	-	-	-	-	-	-	-	-	-	-	-	4HBT_3
ENBDON_00241	1240349.ANGC01000022_gene3417	0.0	1520.0	COG0178@1|root,COG0178@2|Bacteria,2GJUV@201174|Actinobacteria,4FU6V@85025|Nocardiaceae	201174|Actinobacteria	L	ABC transporter	uvrA2	-	-	-	-	-	-	-	-	-	-	-	ABC_tran
ENBDON_00242	1240349.ANGC01000022_gene3418	9.93e-99	287.0	COG2207@1|root,COG2207@2|Bacteria,2IFDE@201174|Actinobacteria,4G0HK@85025|Nocardiaceae	201174|Actinobacteria	K	helix_turn_helix, arabinose operon control protein	-	-	-	-	-	-	-	-	-	-	-	-	HTH_18
ENBDON_00243	1429046.RR21198_4081	0.0	1163.0	COG3387@1|root,COG3387@2|Bacteria,2GJAD@201174|Actinobacteria,4FTW7@85025|Nocardiaceae	201174|Actinobacteria	G	PFAM glycoside hydrolase 15-related protein	-	-	-	-	-	-	-	-	-	-	-	-	Glyco_hydro_15
ENBDON_00244	1240349.ANGC01000022_gene3419	1.65e-93	273.0	COG0346@1|root,COG0346@2|Bacteria,2IHYP@201174|Actinobacteria,4G1AU@85025|Nocardiaceae	201174|Actinobacteria	E	Glyoxalase/Bleomycin resistance protein/Dioxygenase superfamily	-	-	-	-	-	-	-	-	-	-	-	-	Glyoxalase
ENBDON_00245	1240349.ANGC01000022_gene3420	2.03e-199	554.0	COG0053@1|root,COG0053@2|Bacteria,2GJ8Q@201174|Actinobacteria,4FYA9@85025|Nocardiaceae	201174|Actinobacteria	P	Belongs to the cation diffusion facilitator (CDF) transporter (TC 2.A.4) family	-	-	-	-	-	-	-	-	-	-	-	-	Cation_efflux,ZT_dimer
ENBDON_00246	1240349.ANGC01000022_gene3421	1.21e-60	187.0	COG0099@1|root,COG0099@2|Bacteria,2IT4G@201174|Actinobacteria,4G20R@85025|Nocardiaceae	201174|Actinobacteria	J	Located at the top of the head of the 30S subunit, it contacts several helices of the 16S rRNA. In the 70S ribosome it contacts the 23S rRNA (bridge B1a) and protein L5 of the 50S subunit (bridge B1b), connecting the 2 subunits	-	-	-	-	-	-	-	-	-	-	-	-	-
ENBDON_00247	1429046.RR21198_2402	2.22e-138	392.0	COG1309@1|root,COG1309@2|Bacteria,2GMNZ@201174|Actinobacteria,4FY9W@85025|Nocardiaceae	201174|Actinobacteria	K	Transcriptional regulator	-	-	-	-	-	-	-	-	-	-	-	-	TetR_N
ENBDON_00248	1429046.RR21198_2401	4.88e-239	659.0	COG3173@1|root,COG3173@2|Bacteria,2GJT0@201174|Actinobacteria,4FUKX@85025|Nocardiaceae	201174|Actinobacteria	S	Aminoglycoside phosphotransferase	-	-	-	-	-	-	-	-	-	-	-	-	APH
ENBDON_00249	1429046.RR21198_2400	2.11e-291	796.0	COG1960@1|root,COG1960@2|Bacteria,2GKQI@201174|Actinobacteria,4FZ3X@85025|Nocardiaceae	201174|Actinobacteria	I	acyl-CoA dehydrogenase	-	-	1.3.8.7	ko:K00249	ko00071,ko00280,ko00410,ko00640,ko01100,ko01110,ko01130,ko01200,ko01212,ko03320,map00071,map00280,map00410,map00640,map01100,map01110,map01130,map01200,map01212,map03320	M00013,M00036,M00087	R00924,R01175,R01279,R02661,R03172,R03777,R03857,R03990,R04095,R04432,R04751,R04754	RC00052,RC00068,RC00076,RC00095,RC00148,RC00246	ko00000,ko00001,ko00002,ko01000	-	-	-	Acyl-CoA_dh_1,Acyl-CoA_dh_M,Acyl-CoA_dh_N
ENBDON_00250	1429046.RR21198_2397	0.0	997.0	COG0318@1|root,COG0318@2|Bacteria,2GJAA@201174|Actinobacteria,4FUI3@85025|Nocardiaceae	201174|Actinobacteria	IQ	AMP-binding enzyme C-terminal domain	-	-	-	ko:K00666	-	-	-	-	ko00000,ko01000,ko01004	-	-	-	AMP-binding,AMP-binding_C
ENBDON_00251	1429046.RR21198_2396	1.4e-286	787.0	COG0477@1|root,COG0477@2|Bacteria,2GIYR@201174|Actinobacteria,4FZ3F@85025|Nocardiaceae	201174|Actinobacteria	EGP	transporter	-	-	-	-	-	-	-	-	-	-	-	-	MFS_1,Sugar_tr
ENBDON_00252	1429046.RR21198_2395	1.08e-173	489.0	COG0679@1|root,COG0679@2|Bacteria,2IK05@201174|Actinobacteria	201174|Actinobacteria	S	Auxin Efflux Carrier	-	-	-	ko:K07088	-	-	-	-	ko00000	-	-	-	Mem_trans
ENBDON_00253	1429046.RR21198_2394	1.57e-102	298.0	COG5516@1|root,COG5516@2|Bacteria,2GNZF@201174|Actinobacteria,4G0S5@85025|Nocardiaceae	201174|Actinobacteria	S	CGNR zinc finger	-	-	-	-	-	-	-	-	-	-	-	-	zf-CGNR
ENBDON_00255	1429046.RR21198_2392	1.18e-160	452.0	COG1028@1|root,COG1028@2|Bacteria,2GJU1@201174|Actinobacteria,4FYGF@85025|Nocardiaceae	201174|Actinobacteria	IQ	Belongs to the short-chain dehydrogenases reductases (SDR) family	butA	-	1.1.1.100,1.1.1.304,1.1.1.76	ko:K00059,ko:K03366	ko00061,ko00333,ko00650,ko00780,ko01040,ko01100,ko01130,ko01212,map00061,map00333,map00650,map00780,map01040,map01100,map01130,map01212	M00083,M00572	R02855,R02946,R03707,R04533,R04534,R04536,R04543,R04566,R04953,R04964,R07759,R07763,R09078,R10116,R10120,R10505,R11671	RC00029,RC00117,RC00205,RC00525	ko00000,ko00001,ko00002,ko01000,ko01004	-	-	-	adh_short,adh_short_C2
ENBDON_00256	1240349.ANGC01000022_gene3426	4.73e-140	397.0	COG1414@1|root,COG1414@2|Bacteria,2GMEA@201174|Actinobacteria,4FVI3@85025|Nocardiaceae	201174|Actinobacteria	K	IclR helix-turn-helix domain	-	-	-	-	-	-	-	-	-	-	-	-	HTH_IclR
ENBDON_00257	1240349.ANGC01000022_gene3427	0.0	917.0	COG0654@1|root,COG0654@2|Bacteria,2GK88@201174|Actinobacteria,4FW06@85025|Nocardiaceae	201174|Actinobacteria	CH	FAD binding domain	-	-	1.14.13.211	ko:K21267	-	-	-	-	ko00000,ko01000,ko01504	-	-	-	FAD_binding_3
ENBDON_00258	1240349.ANGC01000022_gene3428	0.0	1491.0	COG1018@1|root,COG2124@1|root,COG1018@2|Bacteria,COG2124@2|Bacteria,2GJCV@201174|Actinobacteria,4FU7D@85025|Nocardiaceae	201174|Actinobacteria	C	Protein involved in monooxygenase activity, electron transporter activity, iron ion binding, electron transport, transport and aromatic compound catabolism	-	-	1.1.1.404,1.14.13.238	ko:K21607,ko:K22343	ko00361,ko01100,ko01120,map00361,map01100,map01120	-	R11585	-	ko00000,ko00001,ko01000	-	-	-	FAD_binding_6,Fer2,NAD_binding_1,p450
ENBDON_00259	1240349.ANGC01000022_gene3429	2.59e-311	849.0	COG0477@1|root,COG0477@2|Bacteria,2IEWA@201174|Actinobacteria,4FU6D@85025|Nocardiaceae	201174|Actinobacteria	EGP	Sugar (and other) transporter	-	-	-	-	-	-	-	-	-	-	-	-	MFS_1,Sugar_tr
ENBDON_00261	1240349.ANGC01000022_gene3430	4.77e-77	229.0	COG3824@1|root,COG3824@2|Bacteria,2IKXW@201174|Actinobacteria,4G23T@85025|Nocardiaceae	201174|Actinobacteria	S	Zincin-like metallopeptidase	-	-	-	-	-	-	-	-	-	-	-	-	Zincin_1
ENBDON_00262	1240349.ANGC01000022_gene3431	7.67e-234	646.0	2BXNT@1|root,30VN0@2|Bacteria,2H72W@201174|Actinobacteria,4FYCN@85025|Nocardiaceae	201174|Actinobacteria	S	Septum formation	-	GO:0005575,GO:0005576,GO:0005618,GO:0005623,GO:0005886,GO:0016020,GO:0030312,GO:0044464,GO:0071944	-	-	-	-	-	-	-	-	-	-	Septum_form
ENBDON_00263	1240349.ANGC01000022_gene3432	2.71e-43	145.0	COG0666@1|root,COG0666@2|Bacteria,2IIAC@201174|Actinobacteria,4G24H@85025|Nocardiaceae	201174|Actinobacteria	S	Ankyrin repeats (many copies)	-	-	-	ko:K06867	-	-	-	-	ko00000	-	-	-	Ank_2,Ank_4,Ank_5
ENBDON_00264	1429046.RR21198_2383	1.39e-297	812.0	COG0172@1|root,COG0172@2|Bacteria,2GIWP@201174|Actinobacteria,4FV5K@85025|Nocardiaceae	201174|Actinobacteria	J	Catalyzes the attachment of serine to tRNA(Ser). Is also able to aminoacylate tRNA(Sec) with serine, to form the misacylated tRNA L-seryl-tRNA(Sec), which will be further converted into selenocysteinyl-tRNA(Sec)	serS	GO:0005575,GO:0005623,GO:0005886,GO:0008150,GO:0016020,GO:0040007,GO:0044464,GO:0071944	6.1.1.11	ko:K01875	ko00970,map00970	M00359,M00360	R03662,R08218	RC00055,RC00523	ko00000,ko00001,ko00002,ko01000,ko01007,ko03016	-	-	-	Seryl_tRNA_N,tRNA-synt_2b
ENBDON_00265	1240349.ANGC01000022_gene3434	3.81e-87	256.0	2EKIG@1|root,33E8D@2|Bacteria,2INGR@201174|Actinobacteria,4G1ZI@85025|Nocardiaceae	201174|Actinobacteria	-	-	-	-	-	-	-	-	-	-	-	-	-	-	-
ENBDON_00266	1429046.RR21198_2357	8.3e-123	350.0	COG2050@1|root,COG2050@2|Bacteria,2ISUB@201174|Actinobacteria,4G937@85025|Nocardiaceae	201174|Actinobacteria	Q	Domain of unknown function (DUF4442)	-	-	-	-	-	-	-	-	-	-	-	-	4HBT
ENBDON_00267	1240349.ANGC01000022_gene3436	2.07e-248	686.0	COG0477@1|root,COG2814@2|Bacteria,2GJKY@201174|Actinobacteria,4FU4J@85025|Nocardiaceae	201174|Actinobacteria	EGP	Major Facilitator Superfamily	-	-	-	-	-	-	-	-	-	-	-	-	MFS_1
ENBDON_00268	1240349.ANGC01000022_gene3437	1.05e-144	417.0	COG1511@1|root,COG1511@2|Bacteria,2H5TF@201174|Actinobacteria,4FYQW@85025|Nocardiaceae	201174|Actinobacteria	S	membrane	-	-	-	ko:K01421	-	-	-	-	ko00000	-	-	-	-
ENBDON_00269	1240349.ANGC01000022_gene3438	0.0	1070.0	COG2146@1|root,COG2220@1|root,COG2146@2|Bacteria,COG2220@2|Bacteria,2GP4N@201174|Actinobacteria,4FUUM@85025|Nocardiaceae	201174|Actinobacteria	P	Beta-lactamase superfamily domain	-	-	-	ko:K14952	ko05152,map05152	-	-	-	ko00000,ko00001	-	-	-	Lactamase_B_3,Rieske
ENBDON_00270	1240349.ANGC01000022_gene3439	3.02e-176	491.0	COG0204@1|root,COG0204@2|Bacteria,2GKM6@201174|Actinobacteria,4FU9Z@85025|Nocardiaceae	201174|Actinobacteria	I	Phosphate acyltransferases	plsC	-	2.3.1.51	ko:K00655	ko00561,ko00564,ko01100,ko01110,map00561,map00564,map01100,map01110	M00089	R02241,R09381	RC00004,RC00037,RC00039	ko00000,ko00001,ko00002,ko01000,ko01004	-	-	-	Acyltransferase
ENBDON_00271	1240349.ANGC01000022_gene3440	1.02e-199	553.0	COG0561@1|root,COG0561@2|Bacteria,2GP42@201174|Actinobacteria,4FWX9@85025|Nocardiaceae	201174|Actinobacteria	S	haloacid dehalogenase-like hydrolase	-	-	-	-	-	-	-	-	-	-	-	-	Hydrolase_3
ENBDON_00272	1240349.ANGC01000022_gene3441	0.0	1151.0	COG5479@1|root,COG5479@2|Bacteria,2GNDB@201174|Actinobacteria,4FUE3@85025|Nocardiaceae	201174|Actinobacteria	M	Animal peptidoglycan recognition proteins homologous to Bacteriophage T3 lysozyme.	csp	-	-	-	-	-	-	-	-	-	-	-	Amidase_2,LGFP
ENBDON_00273	1240349.ANGC01000022_gene3442	0.0	986.0	COG2385@1|root,COG5479@1|root,COG2385@2|Bacteria,COG5479@2|Bacteria,2ID9T@201174|Actinobacteria,4FVBV@85025|Nocardiaceae	201174|Actinobacteria	DM	stage II sporulation protein	-	-	-	ko:K06381	-	-	-	-	ko00000	-	-	-	LGFP,SpoIID
ENBDON_00274	1240349.ANGC01000022_gene3443	6.55e-252	692.0	COG0438@1|root,COG0438@2|Bacteria,2GNYW@201174|Actinobacteria,4FVS4@85025|Nocardiaceae	201174|Actinobacteria	M	Glycosyl transferase 4-like domain	pimC	GO:0000009,GO:0000030,GO:0003674,GO:0003824,GO:0004376,GO:0006629,GO:0006643,GO:0006664,GO:0008150,GO:0008152,GO:0008610,GO:0009058,GO:0009247,GO:0009987,GO:0016740,GO:0016757,GO:0016758,GO:0033164,GO:0043750,GO:0044237,GO:0044238,GO:0044249,GO:0044255,GO:0046467,GO:0070085,GO:0071704,GO:0097502,GO:1901135,GO:1901137,GO:1901576,GO:1903509	-	ko:K14335	-	-	-	-	ko00000,ko01000,ko01003	-	GT4	-	Glyco_trans_1_4,Glyco_trans_4_4,Glyco_transf_4,Glycos_transf_1
ENBDON_00275	1240349.ANGC01000022_gene3444	4.94e-140	395.0	COG1695@1|root,COG1695@2|Bacteria,2I997@201174|Actinobacteria,4G37Q@85025|Nocardiaceae	201174|Actinobacteria	K	Transcriptional regulator PadR-like family	-	-	-	-	-	-	-	-	-	-	-	-	PadR,Vir_act_alpha_C
ENBDON_00276	1240349.ANGC01000022_gene3445	9.63e-271	740.0	COG4638@1|root,COG4638@2|Bacteria,2GKMV@201174|Actinobacteria,4FUHQ@85025|Nocardiaceae	201174|Actinobacteria	P	Rieske [2Fe-2S] domain	vanA	-	-	ko:K19982	ko00404,ko01130,map00404,map01130	M00790	R11107	RC01333	ko00000,ko00001,ko00002,ko01000	-	-	-	Rieske
ENBDON_00277	1240349.ANGC01000022_gene3446	1.11e-224	620.0	COG1018@1|root,COG1018@2|Bacteria,2GJCV@201174|Actinobacteria,4G6GS@85025|Nocardiaceae	201174|Actinobacteria	C	2Fe-2S iron-sulfur cluster binding domain	-	-	-	-	-	-	-	-	-	-	-	-	FAD_binding_6,Fer2,NAD_binding_1
ENBDON_00278	1240349.ANGC01000022_gene3447	1.71e-283	779.0	COG0477@1|root,COG2814@2|Bacteria,2GM2G@201174|Actinobacteria,4FZ0N@85025|Nocardiaceae	201174|Actinobacteria	EGP	Sugar (and other) transporter	vanK	-	-	-	-	-	-	-	-	-	-	-	MFS_1,MFS_2,MFS_4,Sugar_tr,TRI12
ENBDON_00279	1240349.ANGC01000022_gene3448	2.22e-92	271.0	2DBEB@1|root,32TXC@2|Bacteria,2IRDQ@201174|Actinobacteria,4G22E@85025|Nocardiaceae	201174|Actinobacteria	-	-	-	-	-	-	-	-	-	-	-	-	-	-	-
ENBDON_00280	1240349.ANGC01000022_gene3449	1.33e-173	484.0	COG0789@1|root,COG0789@2|Bacteria,2H5GI@201174|Actinobacteria,4FXCS@85025|Nocardiaceae	201174|Actinobacteria	K	TipAS antibiotic-recognition domain	-	-	-	ko:K21744	-	-	-	-	ko00000,ko03000	-	-	-	MerR_1,TipAS
ENBDON_00281	1240349.ANGC01000022_gene3450	5.51e-306	832.0	COG0562@1|root,COG0562@2|Bacteria,2GK2Z@201174|Actinobacteria,4FTXD@85025|Nocardiaceae	201174|Actinobacteria	M	UDP-galactopyranose mutase	glf	GO:0003674,GO:0003824,GO:0005575,GO:0005618,GO:0005623,GO:0005886,GO:0008150,GO:0008767,GO:0009273,GO:0009987,GO:0016020,GO:0016853,GO:0016866,GO:0030312,GO:0042546,GO:0044085,GO:0044464,GO:0071554,GO:0071766,GO:0071840,GO:0071944	5.4.99.9	ko:K01854	ko00052,ko00520,map00052,map00520	-	R00505,R09009	RC00317,RC02396	ko00000,ko00001,ko01000	-	-	iNJ661.Rv3809c	GLF,NAD_binding_8
ENBDON_00282	1240349.ANGC01000022_gene3451	0.0	1275.0	COG1216@1|root,COG1216@2|Bacteria,2GM9N@201174|Actinobacteria,4FUKG@85025|Nocardiaceae	201174|Actinobacteria	S	Glycosyltransferase like family 2	glfT	GO:0000271,GO:0003674,GO:0003824,GO:0005575,GO:0005622,GO:0005623,GO:0005737,GO:0005829,GO:0005886,GO:0005975,GO:0005976,GO:0006139,GO:0006629,GO:0006725,GO:0006793,GO:0006807,GO:0008150,GO:0008152,GO:0008194,GO:0008378,GO:0008610,GO:0008653,GO:0008921,GO:0009058,GO:0009059,GO:0009103,GO:0009225,GO:0009273,GO:0009987,GO:0010383,GO:0016020,GO:0016043,GO:0016051,GO:0016740,GO:0016757,GO:0016758,GO:…	2.4.1.288	ko:K16650	-	-	-	-	ko00000,ko01000,ko01003	-	GT2	iNJ661.Rv3808c	Glyco_tranf_2_3
ENBDON_00283	1240349.ANGC01000022_gene3452	7.09e-113	325.0	COG0671@1|root,COG0671@2|Bacteria,2IIA1@201174|Actinobacteria,4FV93@85025|Nocardiaceae	201174|Actinobacteria	I	Acid phosphatase homologues	-	-	3.6.1.27	ko:K19302	ko00550,map00550	-	R05627	RC00002	ko00000,ko00001,ko01000,ko01011	-	-	-	PAP2
ENBDON_00284	1429046.RR21198_4663	1.5e-200	557.0	COG0382@1|root,COG0382@2|Bacteria,2GJ6P@201174|Actinobacteria,4FV0R@85025|Nocardiaceae	201174|Actinobacteria	H	UbiA prenyltransferase family	ubiA	GO:0000287,GO:0003674,GO:0003824,GO:0005488,GO:0005575,GO:0005623,GO:0005886,GO:0005887,GO:0006629,GO:0006643,GO:0006664,GO:0008150,GO:0008152,GO:0008610,GO:0009058,GO:0009247,GO:0009987,GO:0016020,GO:0016021,GO:0016740,GO:0016757,GO:0016763,GO:0031224,GO:0031226,GO:0040007,GO:0043167,GO:0043169,GO:0044237,GO:0044238,GO:0044249,GO:0044255,GO:0044425,GO:0044459,GO:0044464,GO:0046467,GO:0046872,GO:…	2.4.2.45	ko:K14136	-	-	R10095	RC00005	ko00000,ko01000,ko01006	-	-	-	UbiA
ENBDON_00285	1429046.RR21198_4662	0.0	1197.0	COG1807@1|root,COG1807@2|Bacteria,2GNPY@201174|Actinobacteria,4FU3C@85025|Nocardiaceae	201174|Actinobacteria	M	capsule polysaccharide biosynthetic process	aftB	GO:0008150,GO:0040007	-	ko:K13687	-	-	-	-	ko00000,ko01000,ko01003	-	GT89	-	-
ENBDON_00286	1429046.RR21198_4661	1.72e-244	671.0	COG0627@1|root,COG0627@2|Bacteria,2GJX4@201174|Actinobacteria,4FWMB@85025|Nocardiaceae	201174|Actinobacteria	S	Putative esterase	cmtB	-	2.3.1.122,2.3.1.20	ko:K18851	ko00561,ko01100,map00561,map01100	M00089	R02251	RC00004,RC00041	ko00000,ko00001,ko00002,ko01000	-	-	-	Esterase
ENBDON_00287	1429046.RR21198_4660	0.0	1238.0	COG0627@1|root,COG5479@1|root,COG0627@2|Bacteria,COG5479@2|Bacteria,2H37X@201174|Actinobacteria,4FW4Y@85025|Nocardiaceae	201174|Actinobacteria	M	LGFP repeat	csp1	-	-	-	-	-	-	-	-	-	-	-	Esterase,LGFP
ENBDON_00288	1240349.ANGC01000022_gene3457	1.17e-79	241.0	2F2CM@1|root,33VAE@2|Bacteria,2GUDB@201174|Actinobacteria,4G20A@85025|Nocardiaceae	201174|Actinobacteria	S	Protein of unknown function (DUF732)	-	-	-	-	-	-	-	-	-	-	-	-	DUF732
ENBDON_00289	1240349.ANGC01000022_gene3458	2.99e-221	611.0	COG4223@1|root,COG4223@2|Bacteria,2GKXK@201174|Actinobacteria,4FVM7@85025|Nocardiaceae	201174|Actinobacteria	S	Cutinase	elrF	-	-	-	-	-	-	-	-	-	-	-	Cutinase
ENBDON_00290	1240349.ANGC01000022_gene3459	9.82e-233	641.0	COG2141@1|root,COG2141@2|Bacteria,2GMUE@201174|Actinobacteria,4FUR7@85025|Nocardiaceae	201174|Actinobacteria	C	Luciferase-like monooxygenase	-	-	-	-	-	-	-	-	-	-	-	-	Bac_luciferase
ENBDON_00291	1240349.ANGC01000022_gene3460	0.0	1242.0	COG0318@1|root,COG0318@2|Bacteria,2I2RH@201174|Actinobacteria,4FW9D@85025|Nocardiaceae	201174|Actinobacteria	IQ	AMP-binding enzyme	fadD32	GO:0003674,GO:0003824,GO:0005575,GO:0005618,GO:0005623,GO:0005886,GO:0006082,GO:0006629,GO:0006631,GO:0006633,GO:0008150,GO:0008152,GO:0008610,GO:0009058,GO:0009273,GO:0009987,GO:0016020,GO:0016043,GO:0016053,GO:0016740,GO:0016772,GO:0016779,GO:0016874,GO:0019752,GO:0022607,GO:0030312,GO:0032787,GO:0040007,GO:0042546,GO:0043436,GO:0044085,GO:0044237,GO:0044238,GO:0044249,GO:0044255,GO:0044281,GO:…	-	ko:K12428	-	-	-	-	ko00000,ko01004	-	-	iNJ661.Rv3801c	AMP-binding
ENBDON_00292	1240349.ANGC01000022_gene3461	0.0	3042.0	COG3319@1|root,COG3321@1|root,COG3319@2|Bacteria,COG3321@2|Bacteria,2H477@201174|Actinobacteria,4FVY8@85025|Nocardiaceae	201174|Actinobacteria	Q	polyketide synthase	pks13	-	-	ko:K12437,ko:K12443	-	-	-	-	ko00000,ko01004	-	-	-	Acyl_transf_1,KAsynt_C_assoc,KR,Ketoacyl-synt_C,PP-binding,PS-DH,Thioesterase,ketoacyl-synt
ENBDON_00293	1240349.ANGC01000022_gene3462	0.0	1010.0	COG4799@1|root,COG4799@2|Bacteria,2GJMT@201174|Actinobacteria,4FUIW@85025|Nocardiaceae	201174|Actinobacteria	I	Carboxyl transferase domain	accD4	-	-	-	-	-	-	-	-	-	-	-	Carboxyl_trans
ENBDON_00294	1240349.ANGC01000022_gene3463	1.09e-227	627.0	COG5340@1|root,COG5340@2|Bacteria,2I4A3@201174|Actinobacteria,4G9K1@85025|Nocardiaceae	201174|Actinobacteria	K	Psort location Cytoplasmic, score	-	-	-	-	-	-	-	-	-	-	-	-	-
ENBDON_00295	1240349.ANGC01000022_gene3464	1.05e-93	274.0	2AR3U@1|root,31GD1@2|Bacteria,2HK2R@201174|Actinobacteria,4G7TB@85025|Nocardiaceae	201174|Actinobacteria	-	-	-	-	-	-	-	-	-	-	-	-	-	-	-
ENBDON_00296	1429046.RR21198_3824	0.0	2108.0	COG1807@1|root,COG1807@2|Bacteria,2GKH9@201174|Actinobacteria,4FVP5@85025|Nocardiaceae	201174|Actinobacteria	M	EmbC C-terminal domain	embB	GO:0005575,GO:0005618,GO:0005623,GO:0005886,GO:0008150,GO:0016020,GO:0030312,GO:0040007,GO:0044464,GO:0071944	-	ko:K11386,ko:K11387	-	-	-	-	ko00000,ko01000,ko01003	-	-	-	Arabino_trans_C,Arabinose_trans
ENBDON_00297	1240349.ANGC01000022_gene3466	0.0	2078.0	COG1807@1|root,COG1807@2|Bacteria,2GKH9@201174|Actinobacteria,4FUJI@85025|Nocardiaceae	201174|Actinobacteria	M	EmbC C-terminal domain	-	-	-	ko:K11386,ko:K11387	-	-	-	-	ko00000,ko01000,ko01003	-	-	-	Arabino_trans_C,Arabinose_trans
ENBDON_00298	1429046.RR21198_3826	1.39e-45	148.0	COG1426@1|root,COG1426@2|Bacteria,2IQH6@201174|Actinobacteria,4G37P@85025|Nocardiaceae	201174|Actinobacteria	K	Helix-turn-helix XRE-family like proteins	-	-	-	-	-	-	-	-	-	-	-	-	HTH_31
ENBDON_00299	1240349.ANGC01000022_gene3468	1.95e-173	484.0	COG0024@1|root,COG0024@2|Bacteria,2GKKB@201174|Actinobacteria,4FXX1@85025|Nocardiaceae	201174|Actinobacteria	J	Methionine aminopeptidase	map_2	-	3.4.11.18	ko:K01265	-	-	-	-	ko00000,ko01000,ko01002	-	-	-	Peptidase_M24
ENBDON_00300	1240349.ANGC01000022_gene3469	0.0	1797.0	COG0247@1|root,COG0277@1|root,COG0247@2|Bacteria,COG0277@2|Bacteria,2GKI9@201174|Actinobacteria,4FU1X@85025|Nocardiaceae	201174|Actinobacteria	C	4Fe-4S dicluster domain	-	-	-	-	-	-	-	-	-	-	-	-	CCG,FAD-oxidase_C,FAD_binding_4,Fer4_8
ENBDON_00301	1240349.ANGC01000022_gene3470	1.57e-88	260.0	COG3795@1|root,COG3795@2|Bacteria,2GSRV@201174|Actinobacteria,4G2FT@85025|Nocardiaceae	201174|Actinobacteria	S	DoxX-like family	-	-	-	-	-	-	-	-	-	-	-	-	DoxX_2
ENBDON_00302	1240349.ANGC01000022_gene3471	0.0	1178.0	28MYD@1|root,2ZB59@2|Bacteria,2GMV7@201174|Actinobacteria,4FUUK@85025|Nocardiaceae	201174|Actinobacteria	S	Arabinofuranosyltransferase A C terminal	aftA	GO:0003674,GO:0003824,GO:0005575,GO:0005618,GO:0005623,GO:0005886,GO:0008150,GO:0008152,GO:0008194,GO:0008378,GO:0009058,GO:0009059,GO:0009273,GO:0009987,GO:0016020,GO:0016043,GO:0016740,GO:0016757,GO:0016758,GO:0022607,GO:0030312,GO:0034645,GO:0035250,GO:0040007,GO:0042546,GO:0043170,GO:0044036,GO:0044038,GO:0044085,GO:0044237,GO:0044249,GO:0044260,GO:0044464,GO:0045229,GO:0070589,GO:0071554,GO:…	2.4.2.46	ko:K13686	-	-	-	-	ko00000,ko01000,ko01003	-	GT85	-	AftA_C,AftA_N
ENBDON_00303	1240349.ANGC01000022_gene3472	2.37e-179	500.0	COG1028@1|root,COG1028@2|Bacteria,2I2RJ@201174|Actinobacteria,4FV90@85025|Nocardiaceae	201174|Actinobacteria	IQ	Enoyl-(Acyl carrier protein) reductase	dprE2	GO:0000271,GO:0005575,GO:0005623,GO:0005886,GO:0005975,GO:0005976,GO:0008150,GO:0008152,GO:0009058,GO:0009059,GO:0009987,GO:0010383,GO:0016020,GO:0016051,GO:0031221,GO:0033692,GO:0034637,GO:0034645,GO:0035884,GO:0040007,GO:0042546,GO:0043170,GO:0044036,GO:0044038,GO:0044085,GO:0044237,GO:0044238,GO:0044249,GO:0044260,GO:0044262,GO:0044264,GO:0044464,GO:0070589,GO:0070592,GO:0071554,GO:0071704,GO:…	1.1.1.333	ko:K16652	-	-	-	-	ko00000,ko01000	-	-	iNJ661.Rv3791	adh_short
ENBDON_00304	1240349.ANGC01000022_gene3473	0.0	942.0	COG0277@1|root,COG0277@2|Bacteria,2HHAD@201174|Actinobacteria,4FWI1@85025|Nocardiaceae	201174|Actinobacteria	C	D-arabinono-1,4-lactone oxidase	-	-	1.1.98.3	ko:K16653	-	-	-	-	ko00000,ko01000	-	-	-	ALO,FAD_binding_4
ENBDON_00305	1429046.RR21198_3833	8.26e-106	306.0	COG2246@1|root,COG2246@2|Bacteria,2IGKV@201174|Actinobacteria,4G0RU@85025|Nocardiaceae	201174|Actinobacteria	S	GtrA-like protein	-	-	-	-	-	-	-	-	-	-	-	-	GtrA
ENBDON_00306	1429046.RR21198_3834	1.45e-98	287.0	COG2246@1|root,COG2246@2|Bacteria,2IS5I@201174|Actinobacteria,4G9A9@85025|Nocardiaceae	201174|Actinobacteria	S	GtrA-like protein	-	-	-	-	-	-	-	-	-	-	-	-	GtrA
ENBDON_00307	1240349.ANGC01000022_gene3476	4.77e-142	400.0	COG1898@1|root,COG1898@2|Bacteria,2GMW4@201174|Actinobacteria,4FU7V@85025|Nocardiaceae	201174|Actinobacteria	M	dTDP-4-dehydrorhamnose 3,5-epimerase	rmlC	GO:0000271,GO:0003674,GO:0003824,GO:0005975,GO:0005976,GO:0006139,GO:0006725,GO:0006807,GO:0008150,GO:0008152,GO:0008830,GO:0009058,GO:0009059,GO:0009225,GO:0009226,GO:0009987,GO:0016051,GO:0016853,GO:0016854,GO:0016857,GO:0018130,GO:0019305,GO:0019438,GO:0033692,GO:0034637,GO:0034641,GO:0034645,GO:0034654,GO:0040007,GO:0043170,GO:0044237,GO:0044238,GO:0044249,GO:0044260,GO:0044262,GO:0044264,GO:…	5.1.3.13	ko:K01790	ko00521,ko00523,ko01130,map00521,map00523,map01130	M00793	R06514	RC01531	ko00000,ko00001,ko00002,ko01000	-	-	iNJ661.Rv3465	dTDP_sugar_isom
ENBDON_00308	1240349.ANGC01000022_gene3477	2.64e-209	578.0	COG1209@1|root,COG1209@2|Bacteria,2GP20@201174|Actinobacteria,4FWV3@85025|Nocardiaceae	201174|Actinobacteria	M	Catalyzes the formation of dTDP-glucose, from dTTP and glucose 1-phosphate, as well as its pyrophosphorolysis	rmlA	GO:0000271,GO:0000287,GO:0003674,GO:0003824,GO:0005488,GO:0005575,GO:0005618,GO:0005623,GO:0005886,GO:0005975,GO:0005976,GO:0005996,GO:0006006,GO:0006139,GO:0006220,GO:0006725,GO:0006753,GO:0006793,GO:0006796,GO:0006807,GO:0008150,GO:0008152,GO:0008879,GO:0009058,GO:0009059,GO:0009117,GO:0009141,GO:0009147,GO:0009200,GO:0009211,GO:0009219,GO:0009225,GO:0009226,GO:0009262,GO:0009394,GO:0009987,GO:…	2.7.7.24	ko:K00973	ko00521,ko00523,ko00525,ko01130,map00521,map00523,map00525,map01130	M00793	R02328	RC00002	ko00000,ko00001,ko00002,ko01000	-	-	iNJ661.Rv0334	NTP_transferase
ENBDON_00309	1240349.ANGC01000120_gene3415	2.68e-230	634.0	COG1088@1|root,COG1088@2|Bacteria,2GNDU@201174|Actinobacteria,4FV0C@85025|Nocardiaceae	201174|Actinobacteria	M	Belongs to the NAD(P)-dependent epimerase dehydratase family. dTDP-glucose dehydratase subfamily	rfbB	-	4.2.1.46	ko:K01710	ko00521,ko00523,ko00525,ko01055,ko01130,map00521,map00523,map00525,map01055,map01130	M00793	R06513	RC00402	ko00000,ko00001,ko00002,ko01000	-	-	-	GDP_Man_Dehyd
ENBDON_00310	1240349.ANGC01000057_gene4043	2.25e-217	601.0	COG0451@1|root,COG0451@2|Bacteria,2IISR@201174|Actinobacteria,4FXKG@85025|Nocardiaceae	201174|Actinobacteria	GM	RmlD substrate binding domain	-	-	5.1.3.2	ko:K01784	ko00052,ko00520,ko01100,map00052,map00520,map01100	M00361,M00362,M00632	R00291,R02984	RC00289	ko00000,ko00001,ko00002,ko01000	-	-	-	Epimerase
ENBDON_00311	1429046.RR21198_5788	3.06e-239	659.0	COG0463@1|root,COG0463@2|Bacteria,2I3C0@201174|Actinobacteria,4FUE9@85025|Nocardiaceae	201174|Actinobacteria	M	Glycosyl transferase family 2	wcqE	-	2.4.2.53	ko:K10012	ko00520,ko01503,map00520,map01503	M00721,M00761	R07661	RC00005,RC02954	ko00000,ko00001,ko00002,ko01000,ko01005,ko02000	4.D.2.1.8	GT2	-	Glycos_transf_2
ENBDON_00312	1240349.ANGC01000057_gene4045	4.72e-191	531.0	COG1215@1|root,COG1215@2|Bacteria,2I3WV@201174|Actinobacteria,4G8KF@85025|Nocardiaceae	201174|Actinobacteria	M	Glycosyltransferase like family 2	-	-	-	-	-	-	-	-	-	-	-	-	Glycos_transf_2
ENBDON_00313	1240349.ANGC01000057_gene4046	0.0	1414.0	COG4485@1|root,COG4485@2|Bacteria,2HT0R@201174|Actinobacteria,4FVHU@85025|Nocardiaceae	201174|Actinobacteria	S	Bacterial membrane protein, YfhO	-	-	-	-	-	-	-	-	-	-	-	-	-
ENBDON_00314	1240349.ANGC01000057_gene4047	0.0	1254.0	COG1216@1|root,COG1216@2|Bacteria,2GM9N@201174|Actinobacteria,4FUWE@85025|Nocardiaceae	201174|Actinobacteria	S	Glycosyltransferase like family 2	-	-	2.4.1.288	ko:K16650	-	-	-	-	ko00000,ko01000,ko01003	-	GT2	-	Glyco_tranf_2_3
ENBDON_00315	1240349.ANGC01000057_gene4048	0.0	934.0	COG5305@1|root,COG5305@2|Bacteria,2GN7C@201174|Actinobacteria,4FY4E@85025|Nocardiaceae	201174|Actinobacteria	S	Dolichyl-phosphate-mannose-protein mannosyltransferase	-	-	-	ko:K14340	-	-	-	-	ko00000,ko01000,ko01003	-	-	-	PMT_2
ENBDON_00316	1429046.RR21198_5783	5.64e-176	493.0	COG4122@1|root,COG4122@2|Bacteria,2IA2G@201174|Actinobacteria,4FX93@85025|Nocardiaceae	201174|Actinobacteria	S	Macrocin-O-methyltransferase (TylF)	-	-	-	ko:K19856,ko:K21325	ko00523,ko01130,map00523,map01130	M00799	R11041,R11469	RC00003,RC00466	ko00000,ko00001,ko00002,ko01000	-	-	-	Methyltransf_24,TylF
ENBDON_00317	1240349.ANGC01000057_gene4050	1.08e-217	600.0	COG1216@1|root,COG1216@2|Bacteria,2GMQQ@201174|Actinobacteria,4FUBA@85025|Nocardiaceae	201174|Actinobacteria	S	Glycosyl transferase family 2	glfT1	GO:0003674,GO:0003824,GO:0005575,GO:0005623,GO:0005886,GO:0008150,GO:0008152,GO:0008378,GO:0009058,GO:0009059,GO:0009987,GO:0016020,GO:0016043,GO:0016740,GO:0016757,GO:0016758,GO:0034645,GO:0040007,GO:0042546,GO:0043170,GO:0044036,GO:0044038,GO:0044085,GO:0044237,GO:0044249,GO:0044260,GO:0044464,GO:0045229,GO:0070589,GO:0071554,GO:0071555,GO:0071704,GO:0071840,GO:0071944,GO:1901576	2.4.1.287	ko:K16649	-	-	-	-	ko00000,ko01000,ko01003	-	GT2	-	Glyco_tranf_2_3,Glycos_transf_2
ENBDON_00318	1240349.ANGC01000057_gene4051	2.6e-192	534.0	COG1134@1|root,COG1134@2|Bacteria,2GIVF@201174|Actinobacteria,4FU7M@85025|Nocardiaceae	201174|Actinobacteria	GM	ATPases associated with a variety of cellular activities	rfbE	-	-	ko:K01990,ko:K09691	ko02010,map02010	M00250,M00254	-	-	ko00000,ko00001,ko00002,ko02000	3.A.1,3.A.1.103	-	-	ABC_tran
ENBDON_00319	1429046.RR21198_5780	3.46e-188	524.0	COG1682@1|root,COG1682@2|Bacteria,2HH8V@201174|Actinobacteria,4FV9F@85025|Nocardiaceae	201174|Actinobacteria	GM	ABC-2 type transporter	-	-	-	ko:K01992	-	M00254	-	-	ko00000,ko00002,ko02000	3.A.1	-	-	ABC2_membrane
ENBDON_00320	1240349.ANGC01000057_gene4053	5.53e-132	375.0	291ZT@1|root,2ZPJ4@2|Bacteria,2GR7R@201174|Actinobacteria,4FXZ3@85025|Nocardiaceae	201174|Actinobacteria	S	Protein of unknown function (DUF2587)	bpa	GO:0000502,GO:0003674,GO:0005488,GO:0005575,GO:0005618,GO:0005622,GO:0005623,GO:0005886,GO:0008150,GO:0009893,GO:0009894,GO:0009896,GO:0009987,GO:0010604,GO:0016020,GO:0016043,GO:0019222,GO:0022607,GO:0022624,GO:0030162,GO:0030312,GO:0031323,GO:0031325,GO:0031329,GO:0031331,GO:0032268,GO:0032270,GO:0032991,GO:0042176,GO:0043933,GO:0044085,GO:0044424,GO:0044464,GO:0044877,GO:0045732,GO:0045862,GO:…	-	-	-	-	-	-	-	-	-	-	DUF2587
ENBDON_00321	1240349.ANGC01000057_gene4054	7.87e-278	761.0	COG0520@1|root,COG0520@2|Bacteria,2GKAF@201174|Actinobacteria,4FU3K@85025|Nocardiaceae	201174|Actinobacteria	E	Aminotransferase class-V	csd	GO:0005575,GO:0005618,GO:0005623,GO:0005886,GO:0008150,GO:0016020,GO:0030312,GO:0040007,GO:0044464,GO:0071944	2.8.1.7	ko:K04487	ko00730,ko01100,ko04122,map00730,map01100,map04122	-	R07460,R11528,R11529	RC01789,RC02313	ko00000,ko00001,ko01000,ko02048,ko03016,ko03029	-	-	-	Aminotran_5
ENBDON_00322	1240349.ANGC01000057_gene4055	1.89e-228	630.0	COG0604@1|root,COG0604@2|Bacteria,2GN47@201174|Actinobacteria,4FVY2@85025|Nocardiaceae	201174|Actinobacteria	C	Zinc-binding dehydrogenase	-	-	1.6.5.5	ko:K00344	-	-	-	-	ko00000,ko01000	-	-	-	ADH_N,ADH_zinc_N
ENBDON_00323	1240349.ANGC01000057_gene4056	1.34e-109	316.0	COG1846@1|root,COG1846@2|Bacteria,2GP6A@201174|Actinobacteria,4G1PR@85025|Nocardiaceae	201174|Actinobacteria	K	helix_turn_helix multiple antibiotic resistance protein	-	-	-	-	-	-	-	-	-	-	-	-	MarR,MarR_2
ENBDON_00325	1429046.RR21198_5775	2.22e-289	795.0	COG5361@1|root,COG5361@2|Bacteria,2GRDZ@201174|Actinobacteria,4FWN7@85025|Nocardiaceae	201174|Actinobacteria	S	Protein of unknown function (DUF1254)	-	-	-	-	-	-	-	-	-	-	-	-	DUF1214,DUF1254
ENBDON_00326	1240349.ANGC01000057_gene4058	1.39e-232	640.0	COG0627@1|root,COG0627@2|Bacteria,2ICVH@201174|Actinobacteria,4FUWF@85025|Nocardiaceae	201174|Actinobacteria	S	Putative esterase	-	-	-	-	-	-	-	-	-	-	-	-	Esterase
ENBDON_00327	1240349.ANGC01000057_gene4059	0.0	1034.0	COG0737@1|root,COG0737@2|Bacteria,2GKC3@201174|Actinobacteria,4FW5N@85025|Nocardiaceae	201174|Actinobacteria	F	Belongs to the 5'-nucleotidase family	-	-	3.1.3.5	ko:K01081	ko00230,ko00240,ko00760,ko01100,ko01110,map00230,map00240,map00760,map01100,map01110	-	R00183,R00511,R00963,R01126,R01227,R01569,R01664,R01968,R02088,R02102,R02323,R02719,R03346	RC00017	ko00000,ko00001,ko01000	-	-	-	5_nucleotid_C,Metallophos
ENBDON_00328	1240349.ANGC01000057_gene4060	1.43e-251	691.0	COG0079@1|root,COG0079@2|Bacteria,2GJXS@201174|Actinobacteria,4FVSN@85025|Nocardiaceae	201174|Actinobacteria	E	May catalyze the transamination reaction in phenylalanine biosynthesis	pat	-	2.6.1.9	ko:K00817	ko00340,ko00350,ko00360,ko00400,ko00401,ko00960,ko01100,ko01110,ko01130,ko01230,map00340,map00350,map00360,map00400,map00401,map00960,map01100,map01110,map01130,map01230	M00026	R00694,R00734,R03243	RC00006,RC00888	ko00000,ko00001,ko00002,ko01000,ko01007	-	-	-	Aminotran_1_2
ENBDON_00329	1429046.RR21198_5771	3.94e-172	481.0	COG0412@1|root,COG0412@2|Bacteria,2I947@201174|Actinobacteria,4FVRJ@85025|Nocardiaceae	201174|Actinobacteria	Q	Dienelactone hydrolase family	-	-	3.1.1.45	ko:K01061	ko00361,ko00364,ko00623,ko01100,ko01110,ko01120,ko01130,map00361,map00364,map00623,map01100,map01110,map01120,map01130	-	R03893,R05510,R05511,R06835,R06838,R08120,R08121,R09136,R09220,R09222	RC01018,RC01906,RC01907,RC02441,RC02467,RC02468,RC02674,RC02675,RC02686	ko00000,ko00001,ko01000	-	-	-	DLH
ENBDON_00332	1240349.ANGC01000057_gene4062	0.0	880.0	COG0491@1|root,COG0607@1|root,COG0491@2|Bacteria,COG0607@2|Bacteria,2GN50@201174|Actinobacteria,4FXJT@85025|Nocardiaceae	201174|Actinobacteria	P	Rhodanese Homology Domain	-	-	-	-	-	-	-	-	-	-	-	-	Lactamase_B,Rhodanese
ENBDON_00333	1240349.ANGC01000057_gene4063	3.11e-155	439.0	COG0730@1|root,COG0730@2|Bacteria,2I5VT@201174|Actinobacteria,4FWRG@85025|Nocardiaceae	201174|Actinobacteria	S	Sulfite exporter TauE/SafE	-	-	-	ko:K07090	-	-	-	-	ko00000	-	-	-	TauE
ENBDON_00334	1240349.ANGC01000057_gene4064	9e-91	266.0	COG3727@1|root,COG3727@2|Bacteria,2IKPY@201174|Actinobacteria,4G18U@85025|Nocardiaceae	201174|Actinobacteria	L	DNA mismatch endonuclease Vsr	vsr	-	-	ko:K07458	-	-	-	-	ko00000,ko01000,ko03400	-	-	-	NUDIX,Vsr
ENBDON_00335	1240349.ANGC01000057_gene4065	1.79e-284	776.0	COG0270@1|root,COG0270@2|Bacteria,2IF94@201174|Actinobacteria,4FUT9@85025|Nocardiaceae	201174|Actinobacteria	L	C-5 cytosine-specific DNA methylase	-	-	2.1.1.37	ko:K00558	ko00270,ko01100,ko05206,map00270,map01100,map05206	M00035	R04858	RC00003,RC00332	ko00000,ko00001,ko00002,ko01000,ko02048,ko03032,ko03036	-	-	-	DNA_methylase
ENBDON_00336	1240349.ANGC01000057_gene4066	7.8e-33	115.0	29RB8@1|root,30CD1@2|Bacteria,2HKF1@201174|Actinobacteria,4G892@85025|Nocardiaceae	201174|Actinobacteria	-	-	-	-	-	-	-	-	-	-	-	-	-	-	-
ENBDON_00340	1240349.ANGC01000035_gene3269	7.5e-143	403.0	29RUH@1|root,30CYE@2|Bacteria,2HHM4@201174|Actinobacteria,4FVZD@85025|Nocardiaceae	201174|Actinobacteria	-	-	-	-	-	-	-	-	-	-	-	-	-	-	-
ENBDON_00341	1240349.ANGC01000035_gene3268	4.57e-268	734.0	COG3680@1|root,COG3680@2|Bacteria,2GSE0@201174|Actinobacteria,4FYNP@85025|Nocardiaceae	201174|Actinobacteria	O	regulation of methylation-dependent chromatin silencing	-	-	-	ko:K09968	-	-	-	-	ko00000	-	-	-	-
ENBDON_00342	1240349.ANGC01000035_gene3267	2.24e-117	336.0	COG3554@1|root,COG3554@2|Bacteria,2GUNF@201174|Actinobacteria,4FXM6@85025|Nocardiaceae	201174|Actinobacteria	S	Putative glycolipid-binding	-	-	-	ko:K09957	-	-	-	-	ko00000	-	-	-	Glycolipid_bind
ENBDON_00343	1240349.ANGC01000035_gene3266	1.32e-305	835.0	COG0154@1|root,COG0154@2|Bacteria,2GN7F@201174|Actinobacteria,4FZHH@85025|Nocardiaceae	201174|Actinobacteria	J	Amidase	-	-	6.3.5.6,6.3.5.7	ko:K02433	ko00970,ko01100,map00970,map01100	-	R03905,R04212	RC00010	ko00000,ko00001,ko01000,ko03029	-	-	-	Amidase
ENBDON_00344	1240349.ANGC01000035_gene3265	1.24e-207	576.0	COG0287@1|root,COG0287@2|Bacteria,2GKB4@201174|Actinobacteria,4FXND@85025|Nocardiaceae	201174|Actinobacteria	E	Prephenate dehydrogenase	tyrA	GO:0000166,GO:0003674,GO:0003824,GO:0005488,GO:0006082,GO:0006520,GO:0006570,GO:0006571,GO:0006725,GO:0006807,GO:0008150,GO:0008152,GO:0008652,GO:0008977,GO:0009058,GO:0009072,GO:0009073,GO:0009095,GO:0009987,GO:0016053,GO:0016491,GO:0016627,GO:0016628,GO:0019438,GO:0019752,GO:0036094,GO:0043167,GO:0043168,GO:0043436,GO:0044237,GO:0044238,GO:0044249,GO:0044281,GO:0044283,GO:0046394,GO:0048037,GO:…	1.3.1.12	ko:K00210,ko:K04517	ko00400,ko00401,ko01100,ko01110,ko01130,ko01230,map00400,map00401,map01100,map01110,map01130,map01230	M00025	R01728	RC00125	ko00000,ko00001,ko00002,ko01000	-	-	-	PDH
ENBDON_00345	1240349.ANGC01000035_gene3264	3.14e-121	346.0	2BM8T@1|root,32FSI@2|Bacteria,2IG06@201174|Actinobacteria,4FTXR@85025|Nocardiaceae	201174|Actinobacteria	S	tRNA adenosine	-	-	-	-	-	-	-	-	-	-	-	-	-
ENBDON_00346	1240349.ANGC01000035_gene3263	7.14e-105	303.0	COG0590@1|root,COG0590@2|Bacteria,2IM3Z@201174|Actinobacteria,4G0KP@85025|Nocardiaceae	201174|Actinobacteria	FJ	Catalyzes the deamination of adenosine to inosine at the wobble position 34 of tRNA(Arg2)	tadA	-	3.5.4.1,3.5.4.33	ko:K01485,ko:K11991	ko00240,ko00330,ko01100,map00240,map00330,map01100	-	R00974,R01411,R02922,R10223	RC00074,RC00477,RC00514,RC00809	ko00000,ko00001,ko01000,ko03016	-	-	-	MafB19-deam,dCMP_cyt_deam_1
ENBDON_00348	247490.KSU1_C1444	6.3e-140	405.0	COG0523@1|root,COG0523@2|Bacteria,2IXBH@203682|Planctomycetes	203682|Planctomycetes	S	PFAM cobalamin synthesis protein	-	-	-	-	-	-	-	-	-	-	-	-	CobW_C,cobW
ENBDON_00349	247490.KSU1_C1443	1.1e-247	688.0	COG1234@1|root,COG1234@2|Bacteria,2J27A@203682|Planctomycetes	203682|Planctomycetes	S	Beta-lactamase superfamily domain	-	-	-	-	-	-	-	-	-	-	-	-	-
ENBDON_00350	1240349.ANGC01000035_gene3262	6.61e-226	622.0	COG3000@1|root,COG3000@2|Bacteria,2GMF0@201174|Actinobacteria,4FUIV@85025|Nocardiaceae	201174|Actinobacteria	I	Fatty acid hydroxylase superfamily	erg3	GO:0003674,GO:0003824,GO:0004497,GO:0006629,GO:0006643,GO:0008150,GO:0008152,GO:0009987,GO:0016491,GO:0016705,GO:0016714,GO:0044237,GO:0044238,GO:0044255,GO:0050479,GO:0055114,GO:0071704	-	-	-	-	-	-	-	-	-	-	FA_hydroxylase
ENBDON_00351	1240349.ANGC01000035_gene3261	4.15e-116	334.0	COG1309@1|root,COG1309@2|Bacteria,2HNX0@201174|Actinobacteria,4G1HJ@85025|Nocardiaceae	201174|Actinobacteria	K	Bacterial regulatory proteins, tetR family	-	-	-	-	-	-	-	-	-	-	-	-	TetR_N
ENBDON_00352	1240349.ANGC01000035_gene3260	4.56e-206	573.0	COG0842@1|root,COG0842@2|Bacteria,2I31D@201174|Actinobacteria,4G9J2@85025|Nocardiaceae	201174|Actinobacteria	V	Transport permease protein	-	-	-	-	-	-	-	-	-	-	-	-	-
ENBDON_00353	1429046.RR21198_2720	4.87e-101	293.0	COG1959@1|root,COG1959@2|Bacteria,2INF3@201174|Actinobacteria,4G18A@85025|Nocardiaceae	201174|Actinobacteria	K	transcriptional regulator	-	-	-	ko:K13643	-	-	-	-	ko00000,ko03000	-	-	-	Rrf2
ENBDON_00354	1240349.ANGC01000035_gene3258	1.4e-131	374.0	COG1309@1|root,COG1309@2|Bacteria,2HG87@201174|Actinobacteria,4FZFU@85025|Nocardiaceae	201174|Actinobacteria	K	Transcriptional regulator	-	-	-	-	-	-	-	-	-	-	-	-	TetR_N
ENBDON_00355	1429046.RR21198_2718	0.0	1389.0	COG2409@1|root,COG2409@2|Bacteria,2GJ5A@201174|Actinobacteria,4FUTR@85025|Nocardiaceae	201174|Actinobacteria	M	MMPL family	mmpL	-	-	ko:K06994	-	-	-	-	ko00000	-	-	-	MMPL
ENBDON_00356	1240349.ANGC01000035_gene3256	0.0	1036.0	COG1132@1|root,COG1132@2|Bacteria,2GITR@201174|Actinobacteria,4FWTW@85025|Nocardiaceae	201174|Actinobacteria	V	ABC transporter, ATP-binding protein	-	-	-	ko:K06147	-	-	-	-	ko00000,ko02000	3.A.1.106,3.A.1.109,3.A.1.21	-	-	ABC_membrane,ABC_tran
ENBDON_00357	1240349.ANGC01000035_gene3255	0.0	1206.0	COG1132@1|root,COG1132@2|Bacteria,2GITR@201174|Actinobacteria,4FXFW@85025|Nocardiaceae	201174|Actinobacteria	V	ABC transporter transmembrane region	yfiC	-	-	ko:K06147	-	-	-	-	ko00000,ko02000	3.A.1.106,3.A.1.109,3.A.1.21	-	-	ABC_membrane,ABC_tran
ENBDON_00358	1240349.ANGC01000035_gene3254	1.29e-249	689.0	COG0477@1|root,COG0477@2|Bacteria,2GKVX@201174|Actinobacteria,4FU4H@85025|Nocardiaceae	201174|Actinobacteria	EGP	Major Facilitator Superfamily	-	-	-	-	-	-	-	-	-	-	-	-	MFS_1
ENBDON_00359	1240349.ANGC01000035_gene3249	9.46e-202	559.0	COG0583@1|root,COG0583@2|Bacteria,2GJEC@201174|Actinobacteria,4FX0T@85025|Nocardiaceae	201174|Actinobacteria	K	LysR substrate binding domain	iciA	GO:0001130,GO:0003674,GO:0003676,GO:0003677,GO:0003688,GO:0003690,GO:0003700,GO:0005488,GO:0006275,GO:0006355,GO:0008150,GO:0008156,GO:0009889,GO:0009890,GO:0009892,GO:0010468,GO:0010556,GO:0010558,GO:0010605,GO:0019219,GO:0019222,GO:0031323,GO:0031324,GO:0031326,GO:0031327,GO:0043565,GO:0045934,GO:0048519,GO:0048523,GO:0050789,GO:0050794,GO:0051052,GO:0051053,GO:0051171,GO:0051172,GO:0051252,GO:…	-	ko:K05596	-	-	-	-	ko00000,ko03000,ko03036	-	-	-	HTH_1,LysR_substrate
ENBDON_00360	1240349.ANGC01000035_gene3248	1.81e-126	361.0	COG1279@1|root,COG1279@2|Bacteria,2IHQ2@201174|Actinobacteria,4FZH1@85025|Nocardiaceae	201174|Actinobacteria	S	LysE type translocator	lysE	GO:0003333,GO:0003674,GO:0005215,GO:0005342,GO:0005575,GO:0005623,GO:0005886,GO:0006810,GO:0006811,GO:0006812,GO:0006820,GO:0006865,GO:0008150,GO:0008324,GO:0008509,GO:0008514,GO:0015075,GO:0015171,GO:0015174,GO:0015181,GO:0015318,GO:0015711,GO:0015802,GO:0015807,GO:0015809,GO:0015849,GO:0015893,GO:0016020,GO:0022857,GO:0034220,GO:0042221,GO:0042493,GO:0044464,GO:0046942,GO:0046943,GO:0050896,GO:…	-	ko:K06895	-	-	-	-	ko00000,ko02000	2.A.75.1	-	-	LysE
ENBDON_00361	1240349.ANGC01000035_gene3247	9.47e-94	273.0	COG3467@1|root,COG3467@2|Bacteria,2IQ9Y@201174|Actinobacteria	201174|Actinobacteria	K	pyridoxamine 5-phosphate	-	-	-	ko:K07005	-	-	-	-	ko00000	-	-	-	Pyridox_ox_2
ENBDON_00362	1240349.ANGC01000035_gene3246	0.0	1663.0	COG0474@1|root,COG0474@2|Bacteria,2GJJC@201174|Actinobacteria,4FU7Y@85025|Nocardiaceae	201174|Actinobacteria	P	PFAM E1-E2 ATPase-associated domain protein, Haloacid dehalogenase domain protein hydrolase, cation transporting ATPase domain protein	-	-	3.6.3.8	ko:K01537	-	-	-	-	ko00000,ko01000	3.A.3.2	-	-	Cation_ATPase,Cation_ATPase_C,Cation_ATPase_N,E1-E2_ATPase,Hydrolase,Hydrolase_3
ENBDON_00364	1429046.RR21198_2703	3.16e-114	328.0	arCOG11509@1|root,31KIR@2|Bacteria,2IGM0@201174|Actinobacteria,4G6A8@85025|Nocardiaceae	201174|Actinobacteria	-	-	-	-	-	-	-	-	-	-	-	-	-	-	-
ENBDON_00365	1429046.RR21198_2702	3.54e-201	558.0	COG2159@1|root,COG2159@2|Bacteria,2I8XJ@201174|Actinobacteria,4G063@85025|Nocardiaceae	201174|Actinobacteria	S	Amidohydrolase	-	-	4.1.1.52	ko:K22213	-	-	-	-	ko00000,ko01000	-	-	-	Amidohydro_2
ENBDON_00366	1429046.RR21198_2701	1.93e-106	308.0	COG5553@1|root,COG5553@2|Bacteria,2I2T6@201174|Actinobacteria,4G0SI@85025|Nocardiaceae	201174|Actinobacteria	S	Cysteine dioxygenase type I	cdo1	-	-	-	-	-	-	-	-	-	-	-	CDO_I
ENBDON_00367	1240349.ANGC01000035_gene3242	1.13e-235	653.0	COG0477@1|root,COG2814@2|Bacteria,2GK8C@201174|Actinobacteria,4FUI8@85025|Nocardiaceae	201174|Actinobacteria	EGP	Major Facilitator Superfamily	araJ	-	-	ko:K19577	-	-	-	-	ko00000,ko02000	2.A.1.2.65	-	-	MFS_1,Sugar_tr
ENBDON_00368	1240349.ANGC01000035_gene3241	1.05e-313	853.0	COG0343@1|root,COG0343@2|Bacteria,2GMWY@201174|Actinobacteria,4FVTD@85025|Nocardiaceae	201174|Actinobacteria	J	Catalyzes the base-exchange of a guanine (G) residue with the queuine precursor 7-aminomethyl-7-deazaguanine (PreQ1) at position 34 (anticodon wobble position) in tRNAs with GU(N) anticodons (tRNA-Asp, -Asn, -His and -Tyr). Catalysis occurs through a double-displacement mechanism. The nucleophile active site attacks the C1' of nucleotide 34 to detach the guanine base from the RNA, forming a coval…	tgt	-	2.4.2.29	ko:K00773	-	-	R03789,R10209	RC00063	ko00000,ko01000,ko03016	-	-	-	TGT
ENBDON_00369	1240349.ANGC01000035_gene3240	3.99e-165	462.0	COG1738@1|root,COG1738@2|Bacteria,2IFDB@201174|Actinobacteria,4FV1S@85025|Nocardiaceae	201174|Actinobacteria	S	Involved in the import of queuosine (Q) precursors, required for Q precursor salvage	-	-	-	ko:K09125	-	-	-	-	ko00000	-	-	-	Vut_1
ENBDON_00370	1240349.ANGC01000035_gene3239	1.17e-147	427.0	COG5473@1|root,COG5473@2|Bacteria,2GN5K@201174|Actinobacteria,4FWY1@85025|Nocardiaceae	201174|Actinobacteria	J	Zn-ribbon protein possibly nucleic acid-binding	-	-	-	-	-	-	-	-	-	-	-	-	-
ENBDON_00371	1240349.ANGC01000035_gene3238	3.57e-146	420.0	COG1579@1|root,COG5473@1|root,COG1579@2|Bacteria,COG5473@2|Bacteria,2GN5K@201174|Actinobacteria,4FWY1@85025|Nocardiaceae	201174|Actinobacteria	J	Zn-ribbon protein possibly nucleic acid-binding	-	-	-	-	-	-	-	-	-	-	-	-	-
ENBDON_00372	1240349.ANGC01000035_gene3237	5.32e-213	589.0	COG0008@1|root,COG0008@2|Bacteria,2GKMT@201174|Actinobacteria,4FVXF@85025|Nocardiaceae	201174|Actinobacteria	J	Catalyzes the tRNA-independent activation of glutamate in presence of ATP and the subsequent transfer of glutamate onto a tRNA(Asp). Glutamate is transferred on the 2-amino-5-(4,5- dihydroxy-2-cyclopenten-1-yl) moiety of the queuosine in the wobble position of the QUC anticodon	gluQ	-	6.1.1.17	ko:K01885	ko00860,ko00970,ko01100,ko01110,ko01120,map00860,map00970,map01100,map01110,map01120	M00121,M00359,M00360	R05578	RC00055,RC00523	ko00000,ko00001,ko00002,ko01000,ko01007,ko02048,ko03016	-	-	-	tRNA-synt_1c
ENBDON_00373	1240349.ANGC01000035_gene3236	1.19e-201	560.0	COG0583@1|root,COG0583@2|Bacteria,2GMWK@201174|Actinobacteria,4FU6K@85025|Nocardiaceae	201174|Actinobacteria	K	Transcriptional regulator	-	-	-	-	-	-	-	-	-	-	-	-	HTH_1,LysR_substrate
ENBDON_00374	1240349.ANGC01000035_gene3235	0.0	888.0	COG0477@1|root,COG0477@2|Bacteria,2GIYR@201174|Actinobacteria,4FVJB@85025|Nocardiaceae	201174|Actinobacteria	EGP	transporter	-	-	-	-	-	-	-	-	-	-	-	-	MFS_1,Sugar_tr
ENBDON_00375	1240349.ANGC01000035_gene3234	5.38e-166	465.0	COG1028@1|root,COG1028@2|Bacteria,2GJIH@201174|Actinobacteria,4FTXX@85025|Nocardiaceae	201174|Actinobacteria	IQ	Enoyl-(Acyl carrier protein) reductase	bdhA	-	1.1.1.30	ko:K00019	ko00072,ko00650,ko01100,map00072,map00650,map01100	M00088	R01361	RC00117	ko00000,ko00001,ko00002,ko01000	-	-	-	adh_short_C2
ENBDON_00376	1240349.ANGC01000035_gene3233	3.57e-123	352.0	COG1309@1|root,COG1309@2|Bacteria,2GU1I@201174|Actinobacteria,4FZJE@85025|Nocardiaceae	201174|Actinobacteria	K	BetI-type transcriptional repressor, C-terminal	-	-	-	-	-	-	-	-	-	-	-	-	TetR_C_6,TetR_N
ENBDON_00377	1240349.ANGC01000035_gene3232	1.08e-121	350.0	COG2032@1|root,COG2032@2|Bacteria,2INF6@201174|Actinobacteria,4FWMG@85025|Nocardiaceae	201174|Actinobacteria	P	Copper/zinc superoxide dismutase (SODC)	-	-	1.15.1.1	ko:K04565	ko04146,ko04213,ko05014,ko05016,ko05020,map04146,map04213,map05014,map05016,map05020	-	-	-	ko00000,ko00001,ko01000	-	-	-	Sod_Cu
ENBDON_00378	1240349.ANGC01000035_gene3231	4.39e-88	259.0	2CH5R@1|root,32S5B@2|Bacteria,2IQUR@201174|Actinobacteria,4G2Y9@85025|Nocardiaceae	201174|Actinobacteria	-	-	-	-	-	-	-	-	-	-	-	-	-	-	DoxX
ENBDON_00379	1240349.ANGC01000035_gene3230	0.0	986.0	COG1409@1|root,COG1409@2|Bacteria,2GNU9@201174|Actinobacteria,4FYVQ@85025|Nocardiaceae	201174|Actinobacteria	S	Calcineurin-like phosphoesterase	-	-	-	-	-	-	-	-	-	-	-	-	LTD,Metallophos
ENBDON_00380	1240349.ANGC01000035_gene3229	4.12e-124	354.0	COG1576@1|root,COG1576@2|Bacteria,2I47S@201174|Actinobacteria,4G10R@85025|Nocardiaceae	201174|Actinobacteria	J	Mycothiol maleylpyruvate isomerase N-terminal domain	-	-	-	-	-	-	-	-	-	-	-	-	MDMPI_N
ENBDON_00381	1240349.ANGC01000094_gene198	5.53e-174	487.0	COG2207@1|root,COG2207@2|Bacteria,2GWDZ@201174|Actinobacteria,4FUA3@85025|Nocardiaceae	201174|Actinobacteria	K	Helix-turn-helix domain	-	-	-	-	-	-	-	-	-	-	-	-	HTH_18
ENBDON_00382	1240349.ANGC01000094_gene197	3.78e-138	392.0	COG3619@1|root,COG3619@2|Bacteria,2IHN0@201174|Actinobacteria,4G97M@85025|Nocardiaceae	201174|Actinobacteria	S	Protein of unknown function (DUF1275)	-	-	-	-	-	-	-	-	-	-	-	-	DUF1275
ENBDON_00383	1240349.ANGC01000094_gene196	1.03e-187	528.0	COG1525@1|root,COG2356@1|root,COG1525@2|Bacteria,COG2356@2|Bacteria,2GJ38@201174|Actinobacteria,4G9HT@85025|Nocardiaceae	201174|Actinobacteria	L	Protein of unknown function (DUF1524)	-	-	-	-	-	-	-	-	-	-	-	-	DUF1524,Excalibur
ENBDON_00384	1172185.KB911541_gene2042	1.84e-122	360.0	COG2801@1|root,COG2801@2|Bacteria,2GNRT@201174|Actinobacteria	201174|Actinobacteria	L	PFAM Integrase catalytic	-	-	-	-	-	-	-	-	-	-	-	-	rve
ENBDON_00386	1032480.MLP_20870	2.95e-57	182.0	COG2963@1|root,COG2963@2|Bacteria,2ISD7@201174|Actinobacteria	201174|Actinobacteria	L	transposase activity	-	-	-	-	-	-	-	-	-	-	-	-	-
ENBDON_00389	1429046.RR21198_5831	5.79e-306	834.0	COG1167@1|root,COG1167@2|Bacteria,2GKVK@201174|Actinobacteria,4FUFK@85025|Nocardiaceae	201174|Actinobacteria	EK	Alanine-glyoxylate amino-transferase	aspT	-	-	-	-	-	-	-	-	-	-	-	Aminotran_MocR
ENBDON_00390	101510.RHA1_ro04106	1.5e-97	294.0	COG2755@1|root,COG2755@2|Bacteria,2GQD2@201174|Actinobacteria,4G69E@85025|Nocardiaceae	201174|Actinobacteria	E	GDSL-like Lipase/Acylhydrolase	-	-	-	-	-	-	-	-	-	-	-	-	Lipase_GDSL_2
ENBDON_00391	1429046.RR21198_5829	2.05e-95	278.0	2E233@1|root,32XAF@2|Bacteria,2IRY6@201174|Actinobacteria,4G38G@85025|Nocardiaceae	201174|Actinobacteria	-	-	-	-	-	-	-	-	-	-	-	-	-	-	-
ENBDON_00392	1429046.RR21198_5828	2.13e-143	412.0	COG0501@1|root,COG0501@2|Bacteria,2H0IM@201174|Actinobacteria,4G468@85025|Nocardiaceae	201174|Actinobacteria	O	Peptidase family M48	-	-	-	-	-	-	-	-	-	-	-	-	Peptidase_M48
ENBDON_00393	1429046.RR21198_5827	4.97e-74	223.0	COG3682@1|root,COG3682@2|Bacteria,2IKP5@201174|Actinobacteria,4G51V@85025|Nocardiaceae	201174|Actinobacteria	K	Penicillinase repressor	-	-	-	-	-	-	-	-	-	-	-	-	Penicillinase_R
ENBDON_00394	1429046.RR21198_5826	2.44e-83	249.0	2DBEB@1|root,32TXC@2|Bacteria,2IRDQ@201174|Actinobacteria,4G22E@85025|Nocardiaceae	201174|Actinobacteria	-	-	-	-	-	-	-	-	-	-	-	-	-	-	-
ENBDON_00395	1240349.ANGC01000092_gene182	4.15e-142	403.0	COG0428@1|root,COG0428@2|Bacteria,2GISJ@201174|Actinobacteria,4FY7J@85025|Nocardiaceae	201174|Actinobacteria	P	zinc transporter	-	-	-	ko:K07238	-	-	-	-	ko00000,ko02000	2.A.5.5	-	-	-
ENBDON_00396	1429046.RR21198_5822	1.26e-126	361.0	COG0177@1|root,COG0177@2|Bacteria,2GNE5@201174|Actinobacteria,4FUKC@85025|Nocardiaceae	201174|Actinobacteria	L	HhH-GPD superfamily base excision DNA repair protein	-	-	-	-	-	-	-	-	-	-	-	-	HhH-GPD
ENBDON_00397	1240349.ANGC01000092_gene180	1.05e-27	100.0	2AGNJ@1|root,316VX@2|Bacteria,2HKDG@201174|Actinobacteria,4G86X@85025|Nocardiaceae	201174|Actinobacteria	-	-	-	-	-	-	-	-	-	-	-	-	-	-	-
ENBDON_00398	1240349.ANGC01000092_gene179	2.2e-53	168.0	COG2261@1|root,COG2261@2|Bacteria,2GQ2F@201174|Actinobacteria,4G97J@85025|Nocardiaceae	201174|Actinobacteria	S	Transglycosylase associated protein	-	-	-	-	-	-	-	-	-	-	-	-	Transgly_assoc
ENBDON_00399	1240349.ANGC01000092_gene178	4.76e-56	174.0	2ATJW@1|root,32F9U@2|Bacteria,2HJT1@201174|Actinobacteria,4G7B9@85025|Nocardiaceae	201174|Actinobacteria	S	Domain of unknown function (DUF4193)	-	-	-	-	-	-	-	-	-	-	-	-	DUF4193
ENBDON_00400	1240349.ANGC01000092_gene177	6.14e-259	711.0	COG3934@1|root,COG3934@2|Bacteria,2I8ZC@201174|Actinobacteria,4FUJF@85025|Nocardiaceae	201174|Actinobacteria	G	Belongs to the glycosyl hydrolase 5 (cellulase A) family	-	-	3.2.1.78	ko:K19355	ko00051,map00051	-	R01332	RC00467	ko00000,ko00001,ko01000	-	-	-	Cellulase
ENBDON_00401	1240349.ANGC01000092_gene176	1.06e-65	200.0	2AQ1A@1|root,31F6B@2|Bacteria,2HIJ8@201174|Actinobacteria,4G47B@85025|Nocardiaceae	201174|Actinobacteria	-	-	-	-	-	-	-	-	-	-	-	-	-	-	-
ENBDON_00402	101510.RHA1_ro00578	7.75e-38	128.0	COG3795@1|root,COG3795@2|Bacteria,2IKXM@201174|Actinobacteria,4G1YP@85025|Nocardiaceae	201174|Actinobacteria	S	YCII-related domain	-	-	-	-	-	-	-	-	-	-	-	-	YCII
ENBDON_00403	1240349.ANGC01000092_gene174	9.6e-168	471.0	COG0300@1|root,COG0300@2|Bacteria,2I64P@201174|Actinobacteria,4FYQ9@85025|Nocardiaceae	201174|Actinobacteria	S	Enoyl-(Acyl carrier protein) reductase	-	-	-	-	-	-	-	-	-	-	-	-	adh_short
ENBDON_00404	1435356.Y013_18075	0.0	905.0	COG2812@1|root,COG2812@2|Bacteria,2GJKA@201174|Actinobacteria,4FU14@85025|Nocardiaceae	201174|Actinobacteria	L	DNA polymerase III is a complex, multichain enzyme responsible for most of the replicative synthesis in bacteria. This DNA polymerase also exhibits 3' to 5' exonuclease activity	dnaX	GO:0006139,GO:0006259,GO:0006260,GO:0006261,GO:0006725,GO:0006807,GO:0008150,GO:0008152,GO:0009058,GO:0009059,GO:0009987,GO:0034641,GO:0034645,GO:0040007,GO:0043170,GO:0044237,GO:0044238,GO:0044249,GO:0044260,GO:0046483,GO:0071704,GO:0090304,GO:1901360,GO:1901576	2.7.7.7	ko:K02343	ko00230,ko00240,ko01100,ko03030,ko03430,ko03440,map00230,map00240,map01100,map03030,map03430,map03440	M00260	R00375,R00376,R00377,R00378	RC02795	ko00000,ko00001,ko00002,ko01000,ko03032,ko03400	-	-	-	DNA_pol3_delta2,DNA_pol3_gamma3
ENBDON_00405	1429046.RR21198_3055	0.0	900.0	COG0154@1|root,COG0154@2|Bacteria,2GKPZ@201174|Actinobacteria,4FY09@85025|Nocardiaceae	201174|Actinobacteria	J	Belongs to the amidase family	-	-	6.3.5.6,6.3.5.7	ko:K02433	ko00970,ko01100,map00970,map01100	-	R03905,R04212	RC00010	ko00000,ko00001,ko01000,ko03029	-	-	-	Amidase
ENBDON_00406	1240349.ANGC01000032_gene3099	3.64e-160	449.0	COG2197@1|root,COG2197@2|Bacteria,2I5JU@201174|Actinobacteria,4G22W@85025|Nocardiaceae	201174|Actinobacteria	K	helix_turn_helix, Lux Regulon	-	-	-	-	-	-	-	-	-	-	-	-	GerE
ENBDON_00407	1240349.ANGC01000032_gene3100	5.29e-168	471.0	COG1414@1|root,COG1414@2|Bacteria,2GP0G@201174|Actinobacteria,4G93X@85025|Nocardiaceae	201174|Actinobacteria	K	Bacterial transcriptional regulator	-	-	-	-	-	-	-	-	-	-	-	-	HTH_IclR,IclR
ENBDON_00408	1240349.ANGC01000032_gene3101	3e-296	813.0	COG0531@1|root,COG0531@2|Bacteria,2ID3V@201174|Actinobacteria,4G8K1@85025|Nocardiaceae	201174|Actinobacteria	E	Amino acid permease	-	-	-	-	-	-	-	-	-	-	-	-	AA_permease,AA_permease_2
ENBDON_00409	1240349.ANGC01000032_gene3102	0.0	959.0	COG1012@1|root,COG1012@2|Bacteria,2GIWZ@201174|Actinobacteria,4FTXB@85025|Nocardiaceae	201174|Actinobacteria	C	Belongs to the aldehyde dehydrogenase family	-	-	1.2.1.3,1.2.1.39	ko:K00128,ko:K00146	ko00010,ko00053,ko00071,ko00280,ko00310,ko00330,ko00340,ko00360,ko00380,ko00410,ko00561,ko00620,ko00625,ko00643,ko00903,ko00981,ko01100,ko01110,ko01120,ko01130,map00010,map00053,map00071,map00280,map00310,map00330,map00340,map00360,map00380,map00410,map00561,map00620,map00625,map00643,map00903,map00981,map01100,map01110,map01120,map01130	M00135	R00264,R00631,R00710,R00904,R01752,R01986,R02536,R02549,R02678,R02940,R02957,R03283,R03869,R04065,R04506,R04903,R05050,R05237,R05238,R05286,R06366,R08146	RC00047,RC00071,RC00080,RC00186,RC00218,RC00242,RC00816,RC01500	ko00000,ko00001,ko00002,ko01000	-	-	-	Aldedh
ENBDON_00410	1240349.ANGC01000032_gene3103	0.0	893.0	COG0531@1|root,COG0531@2|Bacteria,2GJ1D@201174|Actinobacteria,4FTWM@85025|Nocardiaceae	201174|Actinobacteria	E	amino acid	-	-	-	-	-	-	-	-	-	-	-	-	AA_permease,AA_permease_2
ENBDON_00411	1429046.RR21198_3061	0.0	1305.0	COG3733@1|root,COG3733@2|Bacteria,2GIVJ@201174|Actinobacteria,4FVQI@85025|Nocardiaceae	201174|Actinobacteria	Q	amine oxidase	-	-	1.4.3.21	ko:K00276	ko00260,ko00350,ko00360,ko00410,ko00950,ko00960,ko01100,ko01110,map00260,map00350,map00360,map00410,map00950,map00960,map01100,map01110	-	R02382,R02529,R02613,R03139,R04027,R04300,R06154,R06740	RC00062,RC00189,RC00676,RC01052	ko00000,ko00001,ko01000	-	-	-	Cu_amine_oxid,Cu_amine_oxidN2,Cu_amine_oxidN3
ENBDON_00412	1429046.RR21198_3062	2.74e-59	188.0	2ET4E@1|root,33KNJ@2|Bacteria,2IRR7@201174|Actinobacteria,4G3P3@85025|Nocardiaceae	201174|Actinobacteria	-	-	-	-	-	-	-	-	-	-	-	-	-	-	-
ENBDON_00413	1429046.RR21198_3063	1.08e-139	402.0	COG0726@1|root,COG0726@2|Bacteria,2HEQK@201174|Actinobacteria,4FWR1@85025|Nocardiaceae	201174|Actinobacteria	G	Polysaccharide deacetylase	-	-	3.5.1.104	ko:K22278	-	-	-	-	ko00000,ko01000	-	-	-	Polysacc_deac_1
ENBDON_00414	1240349.ANGC01000032_gene3107	5.76e-160	448.0	29YSC@1|root,30KND@2|Bacteria,2I7VS@201174|Actinobacteria,4FXIM@85025|Nocardiaceae	201174|Actinobacteria	S	PE-PPE domain	-	-	3.1.1.74	ko:K08095	-	-	-	-	ko00000,ko01000	-	-	-	Cutinase
ENBDON_00415	1240349.ANGC01000032_gene3108	5.01e-260	716.0	COG0750@1|root,COG0750@2|Bacteria,2GJJT@201174|Actinobacteria,4G5WV@85025|Nocardiaceae	201174|Actinobacteria	M	Peptidase family M50	rip1	GO:0008150,GO:0040007	-	ko:K11749	ko02024,ko04112,map02024,map04112	-	-	-	ko00000,ko00001,ko01000,ko01002	-	-	-	PDZ_2,Peptidase_M50
ENBDON_00416	1240349.ANGC01000032_gene3109	1.76e-132	377.0	2AQV4@1|root,31G3B@2|Bacteria,2HCI6@201174|Actinobacteria,4G7BB@85025|Nocardiaceae	201174|Actinobacteria	-	-	-	-	-	-	-	-	-	-	-	-	-	-	-
ENBDON_00417	1240349.ANGC01000032_gene3110	1.08e-45	147.0	COG3655@1|root,COG3655@2|Bacteria,2GQZM@201174|Actinobacteria,4G44A@85025|Nocardiaceae	201174|Actinobacteria	K	Cro/C1-type HTH DNA-binding domain	-	-	-	ko:K07727	-	-	-	-	ko00000,ko03000	-	-	-	HTH_26
ENBDON_00418	1240349.ANGC01000032_gene3111	9.08e-25	92.4	2ARFM@1|root,31GRT@2|Bacteria,2HKFW@201174|Actinobacteria,4G8A4@85025|Nocardiaceae	201174|Actinobacteria	-	-	-	-	-	-	-	-	-	-	-	-	-	-	-
ENBDON_00419	1240349.ANGC01000032_gene3112	1.12e-145	412.0	29BFW@1|root,2ZYE8@2|Bacteria,2IJKN@201174|Actinobacteria,4G0WB@85025|Nocardiaceae	201174|Actinobacteria	-	-	-	-	-	-	-	-	-	-	-	-	-	-	-
ENBDON_00420	1240349.ANGC01000032_gene3113	0.0	1155.0	COG4585@1|root,COG4585@2|Bacteria,2HDZV@201174|Actinobacteria,4FZFY@85025|Nocardiaceae	201174|Actinobacteria	T	Histidine kinase	-	-	-	-	-	-	-	-	-	-	-	-	HATPase_c,HisKA_3
ENBDON_00421	1240349.ANGC01000032_gene3114	2.82e-134	382.0	COG2197@1|root,COG2197@2|Bacteria,2IFE7@201174|Actinobacteria,4FYGI@85025|Nocardiaceae	201174|Actinobacteria	K	response regulator	-	-	-	-	-	-	-	-	-	-	-	-	GerE,Response_reg
ENBDON_00422	1240349.ANGC01000032_gene3115	1.86e-287	785.0	COG0183@1|root,COG0183@2|Bacteria,2GJAC@201174|Actinobacteria,4FX7N@85025|Nocardiaceae	201174|Actinobacteria	I	Belongs to the thiolase family	fadA1	-	2.3.1.16,2.3.1.9	ko:K00626,ko:K00632	ko00071,ko00072,ko00280,ko00281,ko00310,ko00362,ko00380,ko00592,ko00620,ko00630,ko00640,ko00642,ko00650,ko00720,ko00900,ko01100,ko01110,ko01120,ko01130,ko01200,ko01212,ko02020,map00071,map00072,map00280,map00281,map00310,map00362,map00380,map00592,map00620,map00630,map00640,map00642,map00650,map00720,map00900,map01100,map01110,map01120,map01130,map01200,map01212,map02020	M00087,M00088,M00095,M00113,M00373,M00374,M00375	R00238,R00829,R00927,R01177,R03778,R03858,R03991,R04546,R04742,R04747,R05506,R05586,R07891,R07895,R07899,R08091,R08095	RC00004,RC00326,RC00405,RC01702,RC02728,RC02898,RC02955	ko00000,ko00001,ko00002,ko01000,ko04147	-	-	-	Thiolase_C,Thiolase_N
ENBDON_00423	1240349.ANGC01000032_gene3116	0.0	1364.0	COG1024@1|root,COG1250@1|root,COG1024@2|Bacteria,COG1250@2|Bacteria,2GJ50@201174|Actinobacteria,4FU0W@85025|Nocardiaceae	201174|Actinobacteria	I	3-hydroxyacyl-CoA dehydrogenase	fadB	-	1.1.1.35,4.2.1.17,5.1.2.3	ko:K01782	ko00071,ko00280,ko00281,ko00310,ko00362,ko00380,ko00410,ko00640,ko00650,ko00903,ko00930,ko01040,ko01100,ko01110,ko01120,ko01130,ko01200,ko01212,map00071,map00280,map00281,map00310,map00362,map00380,map00410,map00640,map00650,map00903,map00930,map01040,map01100,map01110,map01120,map01130,map01200,map01212	M00032,M00087	R01975,R03026,R03045,R03276,R04137,R04170,R04203,R04204,R04224,R04737,R04738,R04739,R04740,R04741,R04744,R04745,R04746,R04748,R04749,R05066,R05305,R06411,R06412,R06941,R06942,R07935,R07951,R08093,R08094	RC00029,RC00099,RC00117,RC00241,RC00525,RC00831,RC00834,RC00896,RC01086,RC01095,RC01098,RC01103,RC01217,RC02115	ko00000,ko00001,ko00002,ko01000	-	-	-	3HCDH,3HCDH_N,ECH_1
ENBDON_00424	1240349.ANGC01000032_gene3118	0.0	872.0	COG2230@1|root,COG2230@2|Bacteria,2GJ94@201174|Actinobacteria,4FUTQ@85025|Nocardiaceae	201174|Actinobacteria	M	Mycolic acid cyclopropane synthetase	cfa	GO:0005575,GO:0005618,GO:0005623,GO:0005886,GO:0016020,GO:0030312,GO:0044464,GO:0071944	2.1.1.79	ko:K00574	-	-	-	-	ko00000,ko01000	-	-	-	CMAS
ENBDON_00425	1429046.RR21198_3085	0.0	949.0	COG0277@1|root,COG0277@2|Bacteria,2GKQR@201174|Actinobacteria,4FVI9@85025|Nocardiaceae	201174|Actinobacteria	C	FAD binding domain	-	-	-	-	-	-	-	-	-	-	-	-	FAD_binding_4
ENBDON_00426	1429046.RR21198_3086	1.27e-94	276.0	COG3832@1|root,COG3832@2|Bacteria,2HJ9Q@201174|Actinobacteria,4G0SK@85025|Nocardiaceae	201174|Actinobacteria	S	Polyketide cyclase / dehydrase and lipid transport	-	-	-	-	-	-	-	-	-	-	-	-	Polyketide_cyc2
ENBDON_00427	1240349.ANGC01000032_gene3121	1.36e-167	469.0	COG0860@1|root,COG0860@2|Bacteria,2GPA9@201174|Actinobacteria,4FTYN@85025|Nocardiaceae	201174|Actinobacteria	M	N-acetylmuramoyl-L-alanine amidase	-	GO:0003674,GO:0003824,GO:0005575,GO:0005623,GO:0008745,GO:0016787,GO:0016810,GO:0016811,GO:0030288,GO:0030313,GO:0031975,GO:0042597,GO:0044464,GO:0061783	3.5.1.28	ko:K01448	ko01503,map01503	M00727	R04112	RC00064,RC00141	ko00000,ko00001,ko00002,ko01000,ko01011,ko03036	-	-	-	Amidase_3
ENBDON_00428	1429046.RR21198_3088	6e-61	188.0	COG0718@1|root,COG0718@2|Bacteria,2IRC4@201174|Actinobacteria,4G22H@85025|Nocardiaceae	201174|Actinobacteria	S	Binds to DNA and alters its conformation. May be involved in regulation of gene expression, nucleoid organization and DNA protection	ybaB	GO:0005575,GO:0005623,GO:0005886,GO:0016020,GO:0044464,GO:0071944	-	ko:K09747	-	-	-	-	ko00000	-	-	-	YbaB_DNA_bd
ENBDON_00429	1429046.RR21198_3089	1.21e-143	405.0	COG0353@1|root,COG0353@2|Bacteria,2GJY0@201174|Actinobacteria,4FU5H@85025|Nocardiaceae	201174|Actinobacteria	L	May play a role in DNA repair. It seems to be involved in an RecBC-independent recombinational process of DNA repair. It may act with RecF and RecO	recR	-	-	ko:K06187	ko03440,map03440	-	-	-	ko00000,ko00001,ko03400	-	-	-	HHH,RecR,Toprim_4
ENBDON_00430	1240349.ANGC01000032_gene3124	6.76e-119	341.0	COG1309@1|root,COG1309@2|Bacteria,2I9A8@201174|Actinobacteria,4G955@85025|Nocardiaceae	201174|Actinobacteria	K	Transcriptional regulator	-	-	-	-	-	-	-	-	-	-	-	-	TetR_N
ENBDON_00431	1240349.ANGC01000032_gene3125	0.0	892.0	COG0477@1|root,COG3104@1|root,COG2814@2|Bacteria,COG3104@2|Bacteria,2H8UD@201174|Actinobacteria,4FZFV@85025|Nocardiaceae	201174|Actinobacteria	EGP	Sugar (and other) transporter	-	-	-	-	-	-	-	-	-	-	-	-	MFS_1,Sugar_tr
ENBDON_00432	1240349.ANGC01000032_gene3126	5.63e-240	659.0	COG3662@1|root,COG3662@2|Bacteria,2GMUA@201174|Actinobacteria,4FYJW@85025|Nocardiaceae	201174|Actinobacteria	S	Uncharacterized protein conserved in bacteria (DUF2236)	-	-	-	-	-	-	-	-	-	-	-	-	DUF2236
ENBDON_00433	1240349.ANGC01000032_gene3127	0.0	956.0	COG1012@1|root,COG1012@2|Bacteria,2GJ95@201174|Actinobacteria,4FVW8@85025|Nocardiaceae	201174|Actinobacteria	C	Belongs to the aldehyde dehydrogenase family	-	-	1.2.99.10	ko:K22445	-	-	-	-	ko00000,ko01000	-	-	-	Aldedh
ENBDON_00434	1240349.ANGC01000032_gene3128	1.89e-274	751.0	COG1960@1|root,COG1960@2|Bacteria,2I5JQ@201174|Actinobacteria,4FYBR@85025|Nocardiaceae	201174|Actinobacteria	I	Acyl-CoA dehydrogenase, C-terminal domain	-	-	-	-	-	-	-	-	-	-	-	-	Acyl-CoA_dh_1,Acyl-CoA_dh_M,Acyl-CoA_dh_N
ENBDON_00435	1240349.ANGC01000032_gene3129	8.93e-143	404.0	COG1802@1|root,COG1802@2|Bacteria,2I8SM@201174|Actinobacteria,4G128@85025|Nocardiaceae	201174|Actinobacteria	K	FCD	-	-	-	-	-	-	-	-	-	-	-	-	FCD,GntR
ENBDON_00437	1240349.ANGC01000032_gene3131	2.68e-277	761.0	COG1309@1|root,COG1309@2|Bacteria,2GN2F@201174|Actinobacteria,4FVE1@85025|Nocardiaceae	201174|Actinobacteria	K	Transcriptional regulator	-	-	-	-	-	-	-	-	-	-	-	-	TetR_N
ENBDON_00439	1240349.ANGC01000032_gene3133	7.98e-159	448.0	COG1024@1|root,COG1024@2|Bacteria,2GJDK@201174|Actinobacteria,4FVJF@85025|Nocardiaceae	201174|Actinobacteria	I	Enoyl-CoA hydratase/isomerase	-	-	4.2.1.17	ko:K01692	ko00071,ko00280,ko00281,ko00310,ko00360,ko00362,ko00380,ko00410,ko00627,ko00640,ko00650,ko00903,ko00930,ko01100,ko01110,ko01120,ko01130,ko01212,map00071,map00280,map00281,map00310,map00360,map00362,map00380,map00410,map00627,map00640,map00650,map00903,map00930,map01100,map01110,map01120,map01130,map01212	M00032,M00087	R03026,R03045,R04137,R04170,R04204,R04224,R04738,R04740,R04744,R04746,R04749,R05595,R06411,R06412,R06942,R08093	RC00831,RC00834,RC01086,RC01095,RC01098,RC01103,RC01217,RC02115	ko00000,ko00001,ko00002,ko01000	-	-	-	ECH_1
ENBDON_00440	1240349.ANGC01000032_gene3134	0.0	1024.0	COG0318@1|root,COG0318@2|Bacteria,2GIUC@201174|Actinobacteria,4FU9J@85025|Nocardiaceae	201174|Actinobacteria	IQ	AMP-binding enzyme C-terminal domain	-	-	-	ko:K00666	-	-	-	-	ko00000,ko01000,ko01004	-	-	-	AMP-binding,AMP-binding_C
ENBDON_00441	1429046.RR21198_4637	1.38e-28	109.0	2APXZ@1|root,31URY@2|Bacteria,2HIFU@201174|Actinobacteria,4G3Z1@85025|Nocardiaceae	201174|Actinobacteria	-	-	-	-	-	-	-	-	-	-	-	-	-	-	-
ENBDON_00442	1240349.ANGC01000032_gene3144	1.51e-19	79.3	2AG9I@1|root,316F2@2|Bacteria,2HK95@201174|Actinobacteria,4G81A@85025|Nocardiaceae	201174|Actinobacteria	-	-	-	-	-	-	-	-	-	-	-	-	-	-	-
ENBDON_00444	1240349.ANGC01000032_gene3146	9.27e-24	91.7	2BKX2@1|root,32FDK@2|Bacteria,2I0R2@201174|Actinobacteria,4G8AY@85025|Nocardiaceae	201174|Actinobacteria	-	-	-	-	-	-	-	-	-	-	-	-	-	-	-
ENBDON_00445	1240349.ANGC01000032_gene3147	1.38e-147	418.0	COG3707@1|root,COG3707@2|Bacteria,2GPHP@201174|Actinobacteria,4FWZT@85025|Nocardiaceae	201174|Actinobacteria	K	ANTAR	-	-	-	-	-	-	-	-	-	-	-	-	ANTAR,GAF_2
ENBDON_00446	1240349.ANGC01000046_gene4683	1.31e-144	410.0	COG3442@1|root,COG3442@2|Bacteria,2GKPV@201174|Actinobacteria,4FY9B@85025|Nocardiaceae	201174|Actinobacteria	S	CobB/CobQ-like glutamine amidotransferase domain	cobQ2	-	-	ko:K07009	-	-	-	-	ko00000	-	-	-	GATase_3
ENBDON_00447	1240349.ANGC01000046_gene4684	1.12e-272	748.0	COG0769@1|root,COG0769@2|Bacteria,2I2TV@201174|Actinobacteria,4FUN3@85025|Nocardiaceae	201174|Actinobacteria	M	Domain of unknown function (DUF1727)	-	-	-	-	-	-	-	-	-	-	-	-	DUF1727,Mur_ligase_M
ENBDON_00448	1240349.ANGC01000046_gene4685	3.56e-311	851.0	COG1226@1|root,COG1226@2|Bacteria,2GJS6@201174|Actinobacteria,4FWB9@85025|Nocardiaceae	201174|Actinobacteria	P	TrkA-N domain	-	-	-	-	-	-	-	-	-	-	-	-	Ion_trans_2,TrkA_C,TrkA_N
ENBDON_00449	1240349.ANGC01000046_gene4686	1.19e-122	350.0	COG5483@1|root,COG5483@2|Bacteria,2IHSH@201174|Actinobacteria,4G2J4@85025|Nocardiaceae	201174|Actinobacteria	S	Protein of unknown function, DUF488	-	-	-	-	-	-	-	-	-	-	-	-	DUF488
ENBDON_00450	1429046.RR21198_4627	1.1e-161	455.0	COG1024@1|root,COG1024@2|Bacteria,2GJ63@201174|Actinobacteria,4FXY5@85025|Nocardiaceae	201174|Actinobacteria	I	Belongs to the enoyl-CoA hydratase isomerase family	-	-	4.2.1.17	ko:K01692	ko00071,ko00280,ko00281,ko00310,ko00360,ko00362,ko00380,ko00410,ko00627,ko00640,ko00650,ko00903,ko00930,ko01100,ko01110,ko01120,ko01130,ko01212,map00071,map00280,map00281,map00310,map00360,map00362,map00380,map00410,map00627,map00640,map00650,map00903,map00930,map01100,map01110,map01120,map01130,map01212	M00032,M00087	R03026,R03045,R04137,R04170,R04204,R04224,R04738,R04740,R04744,R04746,R04749,R05595,R06411,R06412,R06942,R08093	RC00831,RC00834,RC01086,RC01095,RC01098,RC01103,RC01217,RC02115	ko00000,ko00001,ko00002,ko01000	-	-	-	ECH_1
ENBDON_00451	1240349.ANGC01000046_gene4688	8.16e-77	229.0	2AY0M@1|root,31Q26@2|Bacteria,2IMBI@201174|Actinobacteria,4G24E@85025|Nocardiaceae	201174|Actinobacteria	S	Phospholipase_D-nuclease N-terminal	-	-	-	-	-	-	-	-	-	-	-	-	PLDc_N,SHOCT
ENBDON_00452	1240349.ANGC01000046_gene4689	0.0	1205.0	COG0119@1|root,COG0119@2|Bacteria,2GISX@201174|Actinobacteria,4FWCC@85025|Nocardiaceae	201174|Actinobacteria	E	Catalyzes the condensation of the acetyl group of acetyl-CoA with 3-methyl-2-oxobutanoate (2-oxoisovalerate) to form 3-carboxy-3-hydroxy-4-methylpentanoate (2-isopropylmalate)	leuA	GO:0000287,GO:0003674,GO:0003824,GO:0003852,GO:0005488,GO:0005575,GO:0005576,GO:0005623,GO:0005886,GO:0006082,GO:0006520,GO:0006551,GO:0006807,GO:0008150,GO:0008152,GO:0008270,GO:0008652,GO:0009058,GO:0009081,GO:0009082,GO:0009098,GO:0009987,GO:0016020,GO:0016053,GO:0016740,GO:0016746,GO:0019752,GO:0030145,GO:0030955,GO:0031420,GO:0040007,GO:0043167,GO:0043169,GO:0043436,GO:0044237,GO:0044238,GO:…	2.3.3.13	ko:K01649	ko00290,ko00620,ko01100,ko01110,ko01210,ko01230,map00290,map00620,map01100,map01110,map01210,map01230	M00432	R01213	RC00004,RC00470,RC02754	br01601,ko00000,ko00001,ko00002,ko01000	-	-	-	HMGL-like,LeuA_dimer
ENBDON_00453	1240349.ANGC01000046_gene4690	1.65e-115	340.0	COG4409@1|root,COG4409@2|Bacteria,2GKYI@201174|Actinobacteria,4G998@85025|Nocardiaceae	201174|Actinobacteria	G	Domain of unknown function (DUF4185)	-	-	-	-	-	-	-	-	-	-	-	-	DUF4185
ENBDON_00454	1429046.RR21198_4623	2.1e-266	732.0	COG4292@1|root,COG4292@2|Bacteria,2GJPB@201174|Actinobacteria,4FX3A@85025|Nocardiaceae	201174|Actinobacteria	S	Bacterial low temperature requirement A protein (LtrA)	-	-	-	-	-	-	-	-	-	-	-	-	LtrA
ENBDON_00455	1240349.ANGC01000046_gene4691	9.74e-294	803.0	COG0527@1|root,COG0527@2|Bacteria,2GN0G@201174|Actinobacteria,4FVQF@85025|Nocardiaceae	201174|Actinobacteria	E	Belongs to the aspartokinase family	ask	GO:0003674,GO:0003824,GO:0004072,GO:0005575,GO:0005618,GO:0005622,GO:0005623,GO:0005737,GO:0005886,GO:0006082,GO:0006520,GO:0006553,GO:0006793,GO:0006796,GO:0006807,GO:0008150,GO:0008152,GO:0008652,GO:0009058,GO:0009066,GO:0009067,GO:0009085,GO:0009089,GO:0009987,GO:0016020,GO:0016053,GO:0016301,GO:0016310,GO:0016740,GO:0016772,GO:0016774,GO:0019202,GO:0019752,GO:0019877,GO:0030312,GO:0040007,GO:…	2.7.2.4	ko:K00928	ko00260,ko00261,ko00270,ko00300,ko01100,ko01110,ko01120,ko01130,ko01210,ko01230,map00260,map00261,map00270,map00300,map01100,map01110,map01120,map01130,map01210,map01230	M00016,M00017,M00018,M00033,M00525,M00526,M00527	R00480	RC00002,RC00043	ko00000,ko00001,ko00002,ko01000	-	-	-	AA_kinase,ACT,ACT_7
ENBDON_00456	1240349.ANGC01000046_gene4692	6.16e-237	652.0	COG0136@1|root,COG0136@2|Bacteria,2GJJ8@201174|Actinobacteria,4FVR1@85025|Nocardiaceae	201174|Actinobacteria	E	Catalyzes the NADPH-dependent formation of L-aspartate- semialdehyde (L-ASA) by the reductive dephosphorylation of L- aspartyl-4-phosphate	asd	GO:0003674,GO:0003824,GO:0004073,GO:0005575,GO:0005618,GO:0005623,GO:0005886,GO:0006082,GO:0006520,GO:0006553,GO:0006807,GO:0008150,GO:0008152,GO:0008652,GO:0009058,GO:0009066,GO:0009067,GO:0009085,GO:0009089,GO:0009987,GO:0016020,GO:0016053,GO:0016491,GO:0016620,GO:0016903,GO:0019752,GO:0019877,GO:0030312,GO:0040007,GO:0043436,GO:0043648,GO:0043650,GO:0044237,GO:0044238,GO:0044249,GO:0044281,GO:…	1.2.1.11	ko:K00133	ko00260,ko00261,ko00270,ko00300,ko01100,ko01110,ko01120,ko01130,ko01210,ko01230,map00260,map00261,map00270,map00300,map01100,map01110,map01120,map01130,map01210,map01230	M00016,M00017,M00018,M00033,M00525,M00526,M00527	R02291	RC00684	ko00000,ko00001,ko00002,ko01000	-	-	iNJ661.Rv3708c	Semialdhyde_dh,Semialdhyde_dhC
ENBDON_00457	1240349.ANGC01000046_gene4707	1.08e-72	219.0	2A8BD@1|root,30XCY@2|Bacteria,2IH7M@201174|Actinobacteria,4G33T@85025|Nocardiaceae	201174|Actinobacteria	S	SPW repeat	-	-	-	-	-	-	-	-	-	-	-	-	SPW
ENBDON_00458	1240349.ANGC01000046_gene4708	2e-123	353.0	COG1309@1|root,COG1309@2|Bacteria,2IES8@201174|Actinobacteria,4G2DA@85025|Nocardiaceae	201174|Actinobacteria	K	Bacterial regulatory proteins, tetR family	-	-	-	-	-	-	-	-	-	-	-	-	TetR_C_11,TetR_N
ENBDON_00459	1240349.ANGC01000046_gene4709	1.01e-105	305.0	COG2030@1|root,COG2030@2|Bacteria,2GIXP@201174|Actinobacteria,4G8TI@85025|Nocardiaceae	201174|Actinobacteria	I	MaoC like domain	-	-	-	-	-	-	-	-	-	-	-	-	MaoC_dehydratas
ENBDON_00460	1240349.ANGC01000046_gene4710	3.49e-217	598.0	COG2159@1|root,COG2159@2|Bacteria,2GMQY@201174|Actinobacteria,4FZ2V@85025|Nocardiaceae	201174|Actinobacteria	S	Amidohydrolase	-	-	-	ko:K07045	-	-	-	-	ko00000	-	-	-	Amidohydro_2
ENBDON_00461	1240349.ANGC01000046_gene4711	1.99e-206	572.0	COG1028@1|root,COG1028@2|Bacteria,2GN6U@201174|Actinobacteria,4FVCE@85025|Nocardiaceae	201174|Actinobacteria	IQ	KR domain	-	-	1.1.1.100	ko:K00059	ko00061,ko00333,ko00780,ko01040,ko01100,ko01130,ko01212,map00061,map00333,map00780,map01040,map01100,map01130,map01212	M00083,M00572	R04533,R04534,R04536,R04543,R04566,R04953,R04964,R07759,R07763,R10116,R10120,R11671	RC00029,RC00117	ko00000,ko00001,ko00002,ko01000,ko01004	-	-	-	adh_short,adh_short_C2
ENBDON_00462	1429046.RR21198_5012	5.09e-92	270.0	COG1846@1|root,COG1846@2|Bacteria,2GTM4@201174|Actinobacteria,4G3I9@85025|Nocardiaceae	201174|Actinobacteria	K	helix_turn_helix multiple antibiotic resistance protein	-	-	-	-	-	-	-	-	-	-	-	-	MarR,MarR_2
ENBDON_00464	1240349.ANGC01000046_gene4713	9.11e-71	224.0	COG0318@1|root,COG0318@2|Bacteria,2GJR0@201174|Actinobacteria,4FVT8@85025|Nocardiaceae	201174|Actinobacteria	IQ	AMP-binding enzyme	-	-	6.1.3.1	ko:K22319	-	-	-	-	ko00000,ko01000	-	-	-	AMP-binding,Abhydrolase_1
ENBDON_00465	1240349.ANGC01000046_gene4713	1.09e-184	522.0	COG0318@1|root,COG0318@2|Bacteria,2GJR0@201174|Actinobacteria,4FVT8@85025|Nocardiaceae	201174|Actinobacteria	IQ	AMP-binding enzyme	-	-	6.1.3.1	ko:K22319	-	-	-	-	ko00000,ko01000	-	-	-	AMP-binding,Abhydrolase_1
ENBDON_00466	37919.EP51_25075	1.32e-76	229.0	COG1403@1|root,COG1403@2|Bacteria,2IRX4@201174|Actinobacteria,4G228@85025|Nocardiaceae	201174|Actinobacteria	V	HNH endonuclease	-	-	-	-	-	-	-	-	-	-	-	-	HNH_5
ENBDON_00467	1429046.RR21198_5031	6.71e-128	365.0	COG1309@1|root,COG1309@2|Bacteria,2IB4X@201174|Actinobacteria,4G16C@85025|Nocardiaceae	201174|Actinobacteria	K	Bacterial regulatory proteins, tetR family	-	-	-	-	-	-	-	-	-	-	-	-	TetR_N
ENBDON_00468	1240349.ANGC01000023_gene3623	2.03e-291	796.0	2DB8Y@1|root,2Z7TF@2|Bacteria,2GV3U@201174|Actinobacteria,4FWV1@85025|Nocardiaceae	201174|Actinobacteria	S	Uncharacterized protein conserved in bacteria (DUF2236)	-	-	-	-	-	-	-	-	-	-	-	-	DUF2236
ENBDON_00469	1429046.RR21198_5033	2.62e-111	320.0	COG0454@1|root,COG0456@2|Bacteria,2INTM@201174|Actinobacteria,4G2I2@85025|Nocardiaceae	201174|Actinobacteria	K	Acetyltransferase (GNAT) domain	-	-	-	-	-	-	-	-	-	-	-	-	Acetyltransf_1,Acetyltransf_7
ENBDON_00470	1240349.ANGC01000023_gene3625	1.31e-94	275.0	29K1M@1|root,306YZ@2|Bacteria,2H5VE@201174|Actinobacteria,4G28T@85025|Nocardiaceae	201174|Actinobacteria	-	-	-	-	-	-	-	-	-	-	-	-	-	-	-
ENBDON_00471	1240349.ANGC01000023_gene3626	1.88e-152	429.0	COG1051@1|root,COG4111@1|root,COG1051@2|Bacteria,COG4111@2|Bacteria,2GNMT@201174|Actinobacteria,4G0MW@85025|Nocardiaceae	201174|Actinobacteria	F	NUDIX hydrolase	-	-	-	-	-	-	-	-	-	-	-	-	NUDIX
ENBDON_00472	1429046.RR21198_5036	4.01e-216	599.0	COG1397@1|root,COG1397@2|Bacteria,2GKHI@201174|Actinobacteria,4FV5Z@85025|Nocardiaceae	201174|Actinobacteria	O	ADP-ribosylglycohydrolase	-	-	3.2.2.24	ko:K05521	-	-	-	-	ko00000,ko01000	-	-	-	ADP_ribosyl_GH,DSPc
ENBDON_00473	1240349.ANGC01000023_gene3628	5.49e-108	312.0	COG2110@1|root,COG2110@2|Bacteria,2IFEC@201174|Actinobacteria,4G0QP@85025|Nocardiaceae	201174|Actinobacteria	S	Appr-1'-p processing enzyme	lppD	GO:0005575,GO:0005576,GO:0005623,GO:0005886,GO:0016020,GO:0044464,GO:0071944	-	-	-	-	-	-	-	-	-	-	Macro
ENBDON_00474	1240349.ANGC01000023_gene3629	0.0	1624.0	COG1554@1|root,COG1554@2|Bacteria,2GKEV@201174|Actinobacteria,4FU49@85025|Nocardiaceae	201174|Actinobacteria	G	Glycosyl hydrolase family 65, C-terminal domain	-	-	-	-	-	-	-	-	-	-	-	-	Glyco_hydro_65C,Glyco_hydro_65N,Glyco_hydro_65m
ENBDON_00475	1240349.ANGC01000023_gene3630	2.01e-178	498.0	COG1877@1|root,COG1877@2|Bacteria,2HHMV@201174|Actinobacteria,4FZ8S@85025|Nocardiaceae	201174|Actinobacteria	G	Removes the phosphate from trehalose 6-phosphate to produce free trehalose	-	-	3.1.3.12	ko:K01087	ko00500,ko01100,map00500,map01100	-	R02778	RC00017	ko00000,ko00001,ko01000	-	-	-	Trehalose_PPase
ENBDON_00476	1429046.RR21198_4149	8.55e-85	250.0	COG0640@1|root,COG0640@2|Bacteria,2GR57@201174|Actinobacteria,4G22N@85025|Nocardiaceae	201174|Actinobacteria	K	helix_turn_helix, Arsenical Resistance Operon Repressor	-	-	-	ko:K21903	-	-	-	-	ko00000,ko03000	-	-	-	HTH_20,HTH_5,MarR_2
ENBDON_00477	1429046.RR21198_4150	1.9e-68	207.0	COG0375@1|root,COG0375@2|Bacteria,2IMJK@201174|Actinobacteria,4G2AZ@85025|Nocardiaceae	201174|Actinobacteria	S	Hydrogenase/urease nickel incorporation, metallochaperone, hypA	hypA	-	-	ko:K04651	-	-	-	-	ko00000,ko03110	-	-	-	HypA
ENBDON_00478	1429046.RR21198_4151	7.21e-167	469.0	COG0378@1|root,COG0378@2|Bacteria,2HP34@201174|Actinobacteria,4FWK6@85025|Nocardiaceae	201174|Actinobacteria	KO	CobW/HypB/UreG, nucleotide-binding domain	hypB	-	-	ko:K04652	-	-	-	-	ko00000,ko03110	-	-	-	cobW
ENBDON_00479	1429046.RR21198_4152	3.1e-275	750.0	COG1740@1|root,COG1740@2|Bacteria,2GKF2@201174|Actinobacteria,4FXMY@85025|Nocardiaceae	201174|Actinobacteria	C	NiFe/NiFeSe hydrogenase small subunit C-terminal	-	-	1.12.99.6	ko:K06282	ko00633,ko01120,map00633,map01120	-	R08034	RC00250	ko00000,ko00001,ko01000	-	-	-	NiFe_hyd_SSU_C,Oxidored_q6
ENBDON_00480	1429046.RR21198_4153	0.0	1254.0	COG0374@1|root,COG0374@2|Bacteria,2GKQY@201174|Actinobacteria,4FUBR@85025|Nocardiaceae	201174|Actinobacteria	C	Nickel-dependent hydrogenase	hydB	-	1.12.99.6	ko:K06281	ko00633,ko01120,map00633,map01120	-	R08034	RC00250	ko00000,ko00001,ko01000	-	-	-	NiFeSe_Hases
ENBDON_00481	1429046.RR21198_4154	1.24e-198	551.0	COG0694@1|root,COG2146@1|root,COG0694@2|Bacteria,COG2146@2|Bacteria,2GKHD@201174|Actinobacteria,4FVUR@85025|Nocardiaceae	201174|Actinobacteria	OP	NifU-like domain	-	-	-	-	-	-	-	-	-	-	-	-	NifU,Rieske
ENBDON_00482	1429046.RR21198_4155	3.47e-125	358.0	2ADVU@1|root,313MT@2|Bacteria,2H7PH@201174|Actinobacteria,4FYHN@85025|Nocardiaceae	201174|Actinobacteria	-	-	-	-	-	-	-	-	-	-	-	-	-	-	-
ENBDON_00483	1429046.RR21198_4156	2.31e-156	439.0	29Z4R@1|root,30M2D@2|Bacteria,2GNPH@201174|Actinobacteria,4FV3Z@85025|Nocardiaceae	201174|Actinobacteria	-	-	-	-	-	-	-	-	-	-	-	-	-	-	-
ENBDON_00484	1429046.RR21198_4157	1.82e-316	863.0	COG0680@1|root,COG0680@2|Bacteria,2GKMU@201174|Actinobacteria,4FUUV@85025|Nocardiaceae	201174|Actinobacteria	C	Initiates the rapid degradation of small, acid-soluble proteins during spore germination	-	-	-	-	-	-	-	-	-	-	-	-	-
ENBDON_00486	1429046.RR21198_4159	6.2e-103	299.0	COG0680@1|root,COG0680@2|Bacteria,2GN48@201174|Actinobacteria,4G29T@85025|Nocardiaceae	201174|Actinobacteria	C	Hydrogenase maturation protease	hupD	-	-	ko:K03605	-	-	-	-	ko00000,ko01000,ko01002	-	-	-	HycI
ENBDON_00487	1429046.RR21198_4160	6.23e-56	174.0	COG0298@1|root,COG0298@2|Bacteria,2IREM@201174|Actinobacteria,4G3I0@85025|Nocardiaceae	201174|Actinobacteria	O	HupF/HypC family	hypC1	-	-	ko:K04653	-	-	-	-	ko00000	-	-	-	HupF_HypC
ENBDON_00488	1429046.RR21198_4161	0.0	1394.0	COG0068@1|root,COG0068@2|Bacteria,2GJYF@201174|Actinobacteria,4FVKA@85025|Nocardiaceae	201174|Actinobacteria	O	HypF finger	hypF	-	-	ko:K04656	-	-	-	-	ko00000	-	-	-	Acylphosphatase,Sua5_yciO_yrdC,zf-HYPF
ENBDON_00489	1429046.RR21198_4162	4.8e-172	481.0	COG0279@1|root,COG0279@2|Bacteria,2GMKE@201174|Actinobacteria,4FTX2@85025|Nocardiaceae	201174|Actinobacteria	G	HupF/HypC family	-	-	-	-	-	-	-	-	-	-	-	-	HupF_HypC,SIS_2
ENBDON_00490	1429046.RR21198_4163	5.4e-152	428.0	COG0279@1|root,COG0279@2|Bacteria,2GM2Q@201174|Actinobacteria,4G94X@85025|Nocardiaceae	201174|Actinobacteria	G	SIS domain	-	-	5.3.1.28	ko:K03271	ko00540,ko01100,map00540,map01100	M00064	R05645,R09768,R09769	RC00434	ko00000,ko00001,ko00002,ko01000,ko01005	-	-	-	SIS_2
ENBDON_00491	1429046.RR21198_4164	1.79e-245	676.0	COG0309@1|root,COG0309@2|Bacteria,2GJ7N@201174|Actinobacteria,4FTY3@85025|Nocardiaceae	201174|Actinobacteria	O	AIR synthase related protein, C-terminal domain	hypE	-	-	ko:K04655	-	-	-	-	ko00000	-	-	-	AIRS,AIRS_C
ENBDON_00492	1429046.RR21198_4165	1.81e-55	173.0	COG0298@1|root,COG0298@2|Bacteria,2IRJ9@201174|Actinobacteria,4G2I8@85025|Nocardiaceae	201174|Actinobacteria	O	hydrogenase expression formation protein	hypC	-	-	ko:K04653	-	-	-	-	ko00000	-	-	-	HupF_HypC
ENBDON_00493	1429046.RR21198_4166	2.51e-285	778.0	COG0409@1|root,COG0409@2|Bacteria,2GMHA@201174|Actinobacteria,4FVKR@85025|Nocardiaceae	201174|Actinobacteria	O	Hydrogenase formation hypA family	hypD	-	-	ko:K04654	-	-	-	-	ko00000	-	-	-	HypD
ENBDON_00494	1429046.RR21198_4167	3.09e-169	473.0	29JD5@1|root,306AN@2|Bacteria,2I9J8@201174|Actinobacteria,4FVA6@85025|Nocardiaceae	201174|Actinobacteria	-	-	-	-	-	-	-	-	-	-	-	-	-	-	-
ENBDON_00495	1429046.RR21198_4168	4.57e-165	463.0	COG1122@1|root,COG1122@2|Bacteria,2GJ0M@201174|Actinobacteria,4FVAE@85025|Nocardiaceae	201174|Actinobacteria	P	ATPases associated with a variety of cellular activities	cbiO	-	-	ko:K02006,ko:K02008	ko02010,map02010	M00245,M00246	-	-	ko00000,ko00001,ko00002,ko02000	3.A.1.18,3.A.1.22,3.A.1.23	-	-	ABC_tran
ENBDON_00496	1429046.RR21198_4169	1.07e-148	422.0	COG0619@1|root,COG0619@2|Bacteria,2GKQ7@201174|Actinobacteria,4FXBA@85025|Nocardiaceae	201174|Actinobacteria	P	Cobalt transport protein	cbiQ	-	-	ko:K02008	ko02010,map02010	M00245,M00246	-	-	ko00000,ko00001,ko00002,ko02000	3.A.1.18,3.A.1.22,3.A.1.23	-	-	CbiQ
ENBDON_00497	1429046.RR21198_4170	2.28e-49	160.0	COG0310@1|root,COG0310@2|Bacteria,2IS99@201174|Actinobacteria,4G3Q0@85025|Nocardiaceae	201174|Actinobacteria	P	PDGLE domain	-	-	-	ko:K02009	ko02010,map02010	M00245,M00246	-	-	ko00000,ko00001,ko00002,ko02000	3.A.1.18	-	-	PDGLE
ENBDON_00498	1429046.RR21198_4171	5.36e-133	380.0	COG0310@1|root,COG0310@2|Bacteria,2GK2U@201174|Actinobacteria,4FXJQ@85025|Nocardiaceae	201174|Actinobacteria	P	Cobalt uptake substrate-specific transmembrane region	cbiM	-	-	ko:K02007	ko02010,map02010	M00245,M00246	-	-	ko00000,ko00001,ko00002,ko02000	3.A.1.18,3.A.1.22,3.A.1.23	-	-	CbiM,PDGLE
ENBDON_00499	1429046.RR21198_4172	2.29e-79	236.0	2BK5K@1|root,31ESF@2|Bacteria,2IRUP@201174|Actinobacteria,4G4UN@85025|Nocardiaceae	201174|Actinobacteria	-	-	-	-	-	-	-	-	-	-	-	-	-	-	-
ENBDON_00500	1429046.RR21198_4173	1.85e-78	235.0	2E3RQ@1|root,32SHZ@2|Bacteria,2I876@201174|Actinobacteria,4GA20@85025|Nocardiaceae	201174|Actinobacteria	-	-	-	-	-	-	-	-	-	-	-	-	-	-	-
ENBDON_00502	1240349.ANGC01000023_gene3632	8.31e-69	208.0	COG0640@1|root,COG0640@2|Bacteria,2IMDE@201174|Actinobacteria,4G20H@85025|Nocardiaceae	201174|Actinobacteria	K	helix_turn_helix, Arsenical Resistance Operon Repressor	-	-	-	ko:K21885	-	-	-	-	ko00000,ko03000	-	-	-	HTH_20,HTH_5
ENBDON_00503	1240349.ANGC01000023_gene3633	1.06e-146	416.0	COG0053@1|root,COG0053@2|Bacteria,2GQJJ@201174|Actinobacteria,4FVUX@85025|Nocardiaceae	201174|Actinobacteria	P	Cation efflux family	-	-	-	-	-	-	-	-	-	-	-	-	Cation_efflux
ENBDON_00504	1429046.RR21198_4174	6.75e-64	196.0	COG3000@1|root,COG3000@2|Bacteria,2I60N@201174|Actinobacteria,4G9Y1@85025|Nocardiaceae	201174|Actinobacteria	I	Protein of unknown function (DUF3703)	-	-	-	-	-	-	-	-	-	-	-	-	DUF3703
ENBDON_00505	1240349.ANGC01000023_gene3635	8.86e-189	525.0	COG0384@1|root,COG0384@2|Bacteria,2GM1W@201174|Actinobacteria,4FU96@85025|Nocardiaceae	201174|Actinobacteria	S	Phenazine biosynthesis-like protein	-	-	-	-	-	-	-	-	-	-	-	-	PhzC-PhzF
ENBDON_00506	1429046.RR21198_4176	6.12e-296	810.0	COG0477@1|root,COG0477@2|Bacteria,2GIYR@201174|Actinobacteria,4FZ6H@85025|Nocardiaceae	201174|Actinobacteria	EGP	Sugar (and other) transporter	-	-	-	ko:K08172	-	-	-	-	ko00000,ko02000	2.A.1.6.6	-	-	MFS_1,Sugar_tr
ENBDON_00507	1240349.ANGC01000023_gene3637	0.0	971.0	COG0318@1|root,COG0318@2|Bacteria,2GIUC@201174|Actinobacteria,4FTYX@85025|Nocardiaceae	201174|Actinobacteria	IQ	Acyl-CoA synthetase	-	-	-	ko:K00666	-	-	-	-	ko00000,ko01000,ko01004	-	-	-	AMP-binding,AMP-binding_C
ENBDON_00508	1240349.ANGC01000023_gene3638	3.12e-271	743.0	COG1960@1|root,COG1960@2|Bacteria,2GM3V@201174|Actinobacteria,4G0CW@85025|Nocardiaceae	201174|Actinobacteria	I	acyl-CoA dehydrogenase	fadE6	-	1.3.8.7,1.3.8.8	ko:K00249,ko:K00255	ko00071,ko00280,ko00410,ko00640,ko01100,ko01110,ko01130,ko01200,ko01212,ko03320,map00071,map00280,map00410,map00640,map01100,map01110,map01130,map01200,map01212,map03320	M00013,M00036,M00087	R00924,R01175,R01279,R02661,R03172,R03777,R03857,R03990,R04095,R04432,R04751,R04754	RC00052,RC00068,RC00076,RC00095,RC00148,RC00246	ko00000,ko00001,ko00002,ko01000	-	-	-	Acyl-CoA_dh_1,Acyl-CoA_dh_M,Acyl-CoA_dh_N
ENBDON_00509	1240349.ANGC01000023_gene3639	4e-117	335.0	COG1309@1|root,COG1309@2|Bacteria,2GMVQ@201174|Actinobacteria,4FY02@85025|Nocardiaceae	201174|Actinobacteria	K	Transcriptional regulator	-	-	-	-	-	-	-	-	-	-	-	-	TetR_N
ENBDON_00510	1240349.ANGC01000023_gene3640	0.0	989.0	COG2072@1|root,COG2072@2|Bacteria,2GJEA@201174|Actinobacteria,4FWWS@85025|Nocardiaceae	201174|Actinobacteria	P	L-lysine 6-monooxygenase (NADPH-requiring)	-	-	-	-	-	-	-	-	-	-	-	-	FMO-like,K_oxygenase,NAD_binding_8,Pyr_redox_2,Pyr_redox_3
ENBDON_00511	1240349.ANGC01000023_gene3641	0.0	1126.0	COG2303@1|root,COG2303@2|Bacteria,2GJ3J@201174|Actinobacteria,4FXTP@85025|Nocardiaceae	201174|Actinobacteria	E	GMC oxidoreductase	-	-	1.1.3.6	ko:K03333	ko00984,ko01120,map00984,map01120	-	R01459	RC00146	ko00000,ko00001,ko01000	-	-	-	DAO,FAD_binding_2,GMC_oxred_C,GMC_oxred_N
ENBDON_00512	1429046.RR21198_4182	2.62e-152	427.0	2E29H@1|root,32X6D@2|Bacteria,2I517@201174|Actinobacteria,4G9K3@85025|Nocardiaceae	201174|Actinobacteria	-	-	-	-	-	-	-	-	-	-	-	-	-	-	-
ENBDON_00513	1240349.ANGC01000023_gene3643	8.73e-191	529.0	COG1917@1|root,COG1917@2|Bacteria,2IGRA@201174|Actinobacteria,4FY5H@85025|Nocardiaceae	201174|Actinobacteria	S	Cupin 2, conserved barrel domain protein	-	-	-	-	-	-	-	-	-	-	-	-	-
ENBDON_00514	1240349.ANGC01000023_gene3644	4.14e-189	525.0	COG1917@1|root,COG1917@2|Bacteria,2IGRA@201174|Actinobacteria,4G0PF@85025|Nocardiaceae	201174|Actinobacteria	S	Cupin 2, conserved barrel domain protein	-	-	-	-	-	-	-	-	-	-	-	-	-
ENBDON_00515	1240349.ANGC01000023_gene3645	4.11e-95	277.0	COG0735@1|root,COG0735@2|Bacteria,2IFBR@201174|Actinobacteria,4G19A@85025|Nocardiaceae	201174|Actinobacteria	P	Belongs to the Fur family	-	-	-	ko:K03711,ko:K22297	-	-	-	-	ko00000,ko03000	-	-	-	FUR
ENBDON_00516	1240349.ANGC01000023_gene3646	0.0	994.0	COG0753@1|root,COG0753@2|Bacteria,2GITN@201174|Actinobacteria,4FUG9@85025|Nocardiaceae	201174|Actinobacteria	P	Serves to protect cells from the toxic effects of hydrogen peroxide	katA	-	1.11.1.6	ko:K03781	ko00380,ko00630,ko01110,ko01130,ko01200,ko04011,ko04016,ko04068,ko04146,ko04211,ko04212,ko04213,ko05014,map00380,map00630,map01110,map01130,map01200,map04011,map04016,map04068,map04146,map04211,map04212,map04213,map05014	M00532	R00009,R00602,R02670	RC00034,RC00767,RC02141,RC02755	ko00000,ko00001,ko00002,ko01000	-	-	-	Catalase,Catalase-rel
ENBDON_00517	1240349.ANGC01000023_gene3648	6.11e-106	306.0	COG0783@1|root,COG0783@2|Bacteria,2IFDP@201174|Actinobacteria,4G0UB@85025|Nocardiaceae	201174|Actinobacteria	P	Belongs to the Dps family	dps	-	-	ko:K04047	-	-	-	-	ko00000,ko03036	-	-	-	Ferritin
ENBDON_00518	1240349.ANGC01000023_gene3649	2.4e-190	528.0	COG1988@1|root,COG1988@2|Bacteria,2GMNG@201174|Actinobacteria,4FXSR@85025|Nocardiaceae	201174|Actinobacteria	S	LexA-binding, inner membrane-associated putative hydrolase	-	-	-	-	-	-	-	-	-	-	-	-	YdjM
ENBDON_00519	1429046.RR21198_5713	0.0	1128.0	COG0277@1|root,COG0277@2|Bacteria,2I8EZ@201174|Actinobacteria,4FXE8@85025|Nocardiaceae	201174|Actinobacteria	C	Cholesterol oxidase, substrate-binding	-	-	-	-	-	-	-	-	-	-	-	-	Chol_subst-bind,FAD_binding_4
ENBDON_00520	1240349.ANGC01000023_gene3651	0.0	964.0	COG3507@1|root,COG3507@2|Bacteria,2GIYA@201174|Actinobacteria,4FYP0@85025|Nocardiaceae	201174|Actinobacteria	G	Belongs to the glycosyl hydrolase 43 family	-	-	3.2.1.99	ko:K06113	-	-	-	-	ko00000,ko01000	-	GH43	-	Glyco_hydro_43
ENBDON_00521	1240349.ANGC01000023_gene3652	2.82e-141	403.0	COG3550@1|root,COG3550@2|Bacteria,2I2QD@201174|Actinobacteria,4G199@85025|Nocardiaceae	201174|Actinobacteria	S	MDMPI C-terminal domain	-	-	-	-	-	-	-	-	-	-	-	-	MDMPI_C,MDMPI_N
ENBDON_00522	1429046.RR21198_5710	2.8e-215	597.0	COG0614@1|root,COG0614@2|Bacteria,2HU5V@201174|Actinobacteria,4FWD2@85025|Nocardiaceae	201174|Actinobacteria	P	Periplasmic binding protein	fagD	-	-	ko:K02016	ko02010,map02010	M00240	-	-	ko00000,ko00001,ko00002,ko02000	3.A.1.14	-	-	Peripla_BP_2
ENBDON_00524	1240349.ANGC01000023_gene3657	1.51e-233	642.0	COG1408@1|root,COG1408@2|Bacteria,2GJHT@201174|Actinobacteria,4FVKP@85025|Nocardiaceae	201174|Actinobacteria	S	Calcineurin-like phosphoesterase superfamily domain	ykuE	-	-	ko:K07098	-	-	-	-	ko00000	-	-	-	Metallophos,Metallophos_2
ENBDON_00525	1240349.ANGC01000023_gene3658	4.6e-97	283.0	COG1610@1|root,COG1610@2|Bacteria,2IFFJ@201174|Actinobacteria,4G0M7@85025|Nocardiaceae	201174|Actinobacteria	S	Yqey-like protein	yqeY	-	-	ko:K09117	-	-	-	-	ko00000	-	-	-	YqeY
ENBDON_00526	1240349.ANGC01000023_gene3659	0.0	1451.0	COG0744@1|root,COG0744@2|Bacteria,2GK21@201174|Actinobacteria,4FV32@85025|Nocardiaceae	201174|Actinobacteria	M	Transglycosylase	pon1	-	-	-	-	-	-	-	-	-	-	-	PASTA,Transgly,Transpeptidase
ENBDON_00527	1429046.RR21198_5702	3.17e-75	224.0	2CC1Y@1|root,32TCV@2|Bacteria,2IQEP@201174|Actinobacteria,4G1EF@85025|Nocardiaceae	201174|Actinobacteria	K	Acts as a transcriptional regulator. Probably redox- responsive. The apo- but not holo-form probably binds DNA	whiB4	-	-	ko:K18955	-	-	-	-	ko00000,ko03000	-	-	-	Whib
ENBDON_00528	1240349.ANGC01000023_gene3661	2.62e-263	722.0	COG0003@1|root,COG0003@2|Bacteria,2GJYN@201174|Actinobacteria,4FVKW@85025|Nocardiaceae	201174|Actinobacteria	D	Anion-transporting ATPase	-	-	-	-	-	-	-	-	-	-	-	-	ArsA_ATPase
ENBDON_00529	1240349.ANGC01000023_gene3662	1.42e-223	618.0	COG0003@1|root,COG0003@2|Bacteria,2GJ0J@201174|Actinobacteria,4FUAM@85025|Nocardiaceae	201174|Actinobacteria	D	Anion-transporting ATPase	arsA_2	GO:0005575,GO:0005623,GO:0005886,GO:0008150,GO:0016020,GO:0040007,GO:0044464,GO:0071944	-	-	-	-	-	-	-	-	-	-	ArsA_ATPase
ENBDON_00530	1240349.ANGC01000023_gene3663	9.67e-35	118.0	2E3JZ@1|root,32YI8@2|Bacteria,2GQIX@201174|Actinobacteria,4G3YM@85025|Nocardiaceae	201174|Actinobacteria	S	Domain of unknown function (DUF4177)	-	-	-	-	-	-	-	-	-	-	-	-	DUF4177
ENBDON_00531	1240349.ANGC01000023_gene3664	2.7e-85	254.0	COG0251@1|root,COG0251@2|Bacteria,2IHNE@201174|Actinobacteria,4G0FS@85025|Nocardiaceae	201174|Actinobacteria	J	YjgF/chorismate_mutase-like, putative endoribonuclease	yabJ	-	-	-	-	-	-	-	-	-	-	-	YjgF_endoribonc
ENBDON_00532	1240349.ANGC01000023_gene3665	5.02e-184	512.0	COG0491@1|root,COG0491@2|Bacteria,2GKP9@201174|Actinobacteria,4FWKN@85025|Nocardiaceae	201174|Actinobacteria	S	Metallo-beta-lactamase superfamily	pksB_1	-	-	-	-	-	-	-	-	-	-	-	Lactamase_B
ENBDON_00533	1429046.RR21198_5696	3.4e-154	433.0	COG0664@1|root,COG0664@2|Bacteria,2GMPN@201174|Actinobacteria,4FUJV@85025|Nocardiaceae	201174|Actinobacteria	K	Bacterial regulatory proteins, crp family	glxR	GO:0000166,GO:0000976,GO:0001067,GO:0001130,GO:0001216,GO:0001217,GO:0003674,GO:0003676,GO:0003677,GO:0003690,GO:0003700,GO:0005488,GO:0005575,GO:0005618,GO:0005623,GO:0005886,GO:0006109,GO:0006355,GO:0008150,GO:0009889,GO:0009890,GO:0009891,GO:0009892,GO:0009893,GO:0010468,GO:0010556,GO:0010557,GO:0010558,GO:0010565,GO:0010604,GO:0010605,GO:0010628,GO:0010629,GO:0010675,GO:0016020,GO:0017076,GO:…	-	ko:K10914	ko02020,ko02024,ko02025,ko02026,ko05111,map02020,map02024,map02025,map02026,map05111	-	-	-	ko00000,ko00001,ko03000	-	-	-	HTH_Crp_2,cNMP_binding
ENBDON_00534	1240349.ANGC01000023_gene3667	9.4e-48	153.0	2ERSB@1|root,33JBI@2|Bacteria,2GXJS@201174|Actinobacteria,4G353@85025|Nocardiaceae	201174|Actinobacteria	-	-	-	-	-	-	-	-	-	-	-	-	-	-	-
ENBDON_00535	1240349.ANGC01000023_gene3668	2.36e-165	463.0	COG0177@1|root,COG0177@2|Bacteria,2GJ01@201174|Actinobacteria,4FW4F@85025|Nocardiaceae	201174|Actinobacteria	L	DNA repair enzyme that has both DNA N-glycosylase activity and AP-lyase activity. The DNA N-glycosylase activity releases various damaged pyrimidines from DNA by cleaving the N- glycosidic bond, leaving an AP (apurinic apyrimidinic) site. The AP-lyase activity cleaves the phosphodiester bond 3' to the AP site by a beta-elimination, leaving a 3'-terminal unsaturated sugar and a product with a term…	nth	GO:0003674,GO:0003676,GO:0003677,GO:0003690,GO:0003824,GO:0005488,GO:0005575,GO:0005618,GO:0005623,GO:0005886,GO:0006139,GO:0006259,GO:0006281,GO:0006725,GO:0006807,GO:0006950,GO:0006974,GO:0008150,GO:0008152,GO:0009987,GO:0016020,GO:0016787,GO:0016798,GO:0016799,GO:0019104,GO:0030312,GO:0033554,GO:0034641,GO:0043170,GO:0044237,GO:0044238,GO:0044260,GO:0044464,GO:0046483,GO:0050896,GO:0051716,GO:…	4.2.99.18	ko:K10773	ko03410,map03410	-	-	-	ko00000,ko00001,ko01000,ko03400	-	-	-	EndIII_4Fe-2S,HhH-GPD
ENBDON_00536	1240349.ANGC01000023_gene3669	1.74e-144	408.0	COG0526@1|root,COG0526@2|Bacteria,2IMNX@201174|Actinobacteria,4G0Y6@85025|Nocardiaceae	201174|Actinobacteria	CO	Redoxin	resA_1	-	-	-	-	-	-	-	-	-	-	-	AhpC-TSA,Redoxin
ENBDON_00537	1240349.ANGC01000023_gene3670	6.9e-167	466.0	COG0494@1|root,COG0494@2|Bacteria,2GKG9@201174|Actinobacteria,4FUEG@85025|Nocardiaceae	201174|Actinobacteria	L	NUDIX domain	nudL	-	-	ko:K18568	ko00332,ko01130,map00332,map01130	-	R10747	RC00002	ko00000,ko00001,ko01000	-	-	-	NUDIX
ENBDON_00538	1240349.ANGC01000023_gene3671	1.82e-258	711.0	COG0265@1|root,COG0265@2|Bacteria,2GJ92@201174|Actinobacteria,4FU76@85025|Nocardiaceae	201174|Actinobacteria	O	Colicin V production protein	cvpA	GO:0005575,GO:0005576,GO:0005618,GO:0005623,GO:0005886,GO:0005887,GO:0008150,GO:0009268,GO:0009405,GO:0009628,GO:0010447,GO:0016020,GO:0016021,GO:0030312,GO:0031224,GO:0031226,GO:0044419,GO:0044425,GO:0044459,GO:0044464,GO:0050896,GO:0051704,GO:0071944	-	-	-	-	-	-	-	-	-	-	Colicin_V,Trypsin_2
ENBDON_00539	1240349.ANGC01000023_gene3672	9.12e-238	652.0	COG0596@1|root,COG0596@2|Bacteria,2GJDM@201174|Actinobacteria,4G9EI@85025|Nocardiaceae	201174|Actinobacteria	S	Alpha/beta hydrolase family	ephE	-	-	-	-	-	-	-	-	-	-	-	Abhydrolase_1,Abhydrolase_6
ENBDON_00540	1240349.ANGC01000023_gene3673	1.29e-100	293.0	2DPPE@1|root,332VJ@2|Bacteria,2IN30@201174|Actinobacteria,4G0FE@85025|Nocardiaceae	201174|Actinobacteria	S	Putative Actinobacterial Holin-X, holin superfamily III	-	-	-	-	-	-	-	-	-	-	-	-	Phage_holin_3_6
ENBDON_00541	1240349.ANGC01000023_gene3674	2.02e-271	745.0	COG3004@1|root,COG3004@2|Bacteria,2GKIK@201174|Actinobacteria,4FVXH@85025|Nocardiaceae	201174|Actinobacteria	P	Na( ) H( ) antiporter that extrudes sodium in exchange for external protons	nhaA	-	-	ko:K03313	-	-	-	-	ko00000,ko02000	2.A.33.1	-	-	Na_H_antiport_1
ENBDON_00542	1240349.ANGC01000023_gene3675	0.0	879.0	COG0477@1|root,COG0477@2|Bacteria,2GIYR@201174|Actinobacteria,4FVJB@85025|Nocardiaceae	201174|Actinobacteria	EGP	transporter	-	-	-	-	-	-	-	-	-	-	-	-	MFS_1,Sugar_tr
ENBDON_00543	1240349.ANGC01000023_gene3676	0.0	1279.0	COG0365@1|root,COG0365@2|Bacteria,2GJCG@201174|Actinobacteria,4FVWN@85025|Nocardiaceae	201174|Actinobacteria	I	Catalyzes the conversion of acetate into acetyl-CoA (AcCoA), an essential intermediate at the junction of anabolic and catabolic pathways. AcsA undergoes a two-step reaction. In the first half reaction, AcsA combines acetate with ATP to form acetyl-adenylate (AcAMP) intermediate. In the second half reaction, it can then transfer the acetyl group from AcAMP to the sulfhydryl group of CoA, forming …	acsA	-	6.2.1.1	ko:K01895	ko00010,ko00620,ko00640,ko00680,ko00720,ko01100,ko01110,ko01120,ko01130,ko01200,map00010,map00620,map00640,map00680,map00720,map01100,map01110,map01120,map01130,map01200	M00357	R00235,R00236,R00316,R00926,R01354	RC00004,RC00012,RC00043,RC00070,RC02746,RC02816	ko00000,ko00001,ko00002,ko01000,ko01004	-	-	-	ACAS_N,AMP-binding,AMP-binding_C
ENBDON_00544	1240349.ANGC01000023_gene3677	8.85e-165	462.0	COG3177@1|root,COG3177@2|Bacteria,2GIT8@201174|Actinobacteria,4FW7C@85025|Nocardiaceae	201174|Actinobacteria	S	Filamentation induced by cAMP protein fic	-	-	-	-	-	-	-	-	-	-	-	-	Fic
ENBDON_00546	1240349.ANGC01000023_gene3678	1.09e-171	482.0	COG0560@1|root,COG0560@2|Bacteria,2GJVX@201174|Actinobacteria,4FTZ0@85025|Nocardiaceae	201174|Actinobacteria	E	haloacid dehalogenase-like hydrolase	serB	GO:0005575,GO:0005622,GO:0005623,GO:0005737,GO:0005829,GO:0044424,GO:0044444,GO:0044464	-	-	-	-	-	-	-	-	-	-	HAD
ENBDON_00547	1240349.ANGC01000023_gene3679	4.89e-241	664.0	COG4963@1|root,COG4963@2|Bacteria,2I2PT@201174|Actinobacteria,4FUVK@85025|Nocardiaceae	201174|Actinobacteria	U	Pilus assembly protein	-	-	-	-	-	-	-	-	-	-	-	-	-
ENBDON_00548	1240349.ANGC01000023_gene3680	7.88e-269	737.0	COG4962@1|root,COG4962@2|Bacteria,2GKKJ@201174|Actinobacteria,4FUYS@85025|Nocardiaceae	201174|Actinobacteria	U	Type II/IV secretion system protein	cpaF	-	-	ko:K02283	-	-	-	-	ko00000,ko02035,ko02044	-	-	-	T2SSE
ENBDON_00549	1240349.ANGC01000023_gene3681	6.31e-141	403.0	COG4965@1|root,COG4965@2|Bacteria,2I8NR@201174|Actinobacteria,4FXM2@85025|Nocardiaceae	201174|Actinobacteria	U	Type ii secretion system	-	-	-	ko:K12510	-	-	-	-	ko00000,ko02044	-	-	-	T2SSF
ENBDON_00550	1240349.ANGC01000023_gene3682	1.22e-119	344.0	COG2064@1|root,COG2064@2|Bacteria,2IQE9@201174|Actinobacteria,4G270@85025|Nocardiaceae	201174|Actinobacteria	NU	Type II secretion system (T2SS), protein F	-	-	-	ko:K12510	-	-	-	-	ko00000,ko02044	-	-	-	T2SSF
ENBDON_00551	1240349.ANGC01000023_gene3683	2.37e-28	102.0	2EHCF@1|root,33B4A@2|Bacteria,2GSFV@201174|Actinobacteria,4G41Q@85025|Nocardiaceae	201174|Actinobacteria	S	Protein of unknown function (DUF4244)	-	-	-	-	-	-	-	-	-	-	-	-	DUF4244
ENBDON_00552	1240349.ANGC01000023_gene3684	4.61e-61	189.0	2EGB2@1|root,33A2X@2|Bacteria,2GQUA@201174|Actinobacteria,4G2ZE@85025|Nocardiaceae	201174|Actinobacteria	-	-	-	-	-	-	-	-	-	-	-	-	-	-	TadE
ENBDON_00553	1240349.ANGC01000023_gene3685	3.15e-55	173.0	2DRBM@1|root,33B4F@2|Bacteria,2GXTD@201174|Actinobacteria,4G409@85025|Nocardiaceae	201174|Actinobacteria	S	Putative Flp pilus-assembly TadE/G-like	-	-	-	-	-	-	-	-	-	-	-	-	Tad
ENBDON_00554	1240349.ANGC01000023_gene3686	0.0	1524.0	COG1205@1|root,COG1205@2|Bacteria,2GJJ6@201174|Actinobacteria,4FVU0@85025|Nocardiaceae	201174|Actinobacteria	L	Domain of unknown function (DUF1998)	-	-	-	ko:K06877	-	-	-	-	ko00000	-	-	-	DEAD,DUF1998,Helicase_C
ENBDON_00555	1123258.AQXZ01000015_gene4768	2.32e-43	140.0	COG1278@1|root,COG1278@2|Bacteria,2GQRU@201174|Actinobacteria,4G30I@85025|Nocardiaceae	201174|Actinobacteria	K	'Cold-shock' DNA-binding domain	cspA_1	GO:0005575,GO:0005618,GO:0005623,GO:0008150,GO:0030312,GO:0040007,GO:0044464,GO:0071944	-	ko:K03704	-	-	-	-	ko00000,ko03000	-	-	-	CSD
ENBDON_00556	1240349.ANGC01000023_gene3688	3.2e-131	373.0	2EE2C@1|root,337X2@2|Bacteria,2GNPT@201174|Actinobacteria,4FX6T@85025|Nocardiaceae	201174|Actinobacteria	-	-	-	-	-	-	-	-	-	-	-	-	-	-	-
ENBDON_00557	1240349.ANGC01000023_gene3689	0.0	1734.0	COG0550@1|root,COG1754@1|root,COG0550@2|Bacteria,COG1754@2|Bacteria,2GJU7@201174|Actinobacteria,4FUA6@85025|Nocardiaceae	201174|Actinobacteria	L	Releases the supercoiling and torsional tension of DNA, which is introduced during the DNA replication and transcription, by transiently cleaving and rejoining one strand of the DNA duplex. Introduces a single-strand break via transesterification at a target site in duplex DNA. The scissile phosphodiester is attacked by the catalytic tyrosine of the enzyme, resulting in the formation of a DNA-(5'…	topA	GO:0000287,GO:0003674,GO:0003824,GO:0003916,GO:0003917,GO:0005488,GO:0005575,GO:0005618,GO:0005622,GO:0005623,GO:0005737,GO:0005829,GO:0005886,GO:0008150,GO:0009892,GO:0010605,GO:0016020,GO:0016853,GO:0019219,GO:0019222,GO:0030312,GO:0031323,GO:0031324,GO:0032069,GO:0032074,GO:0040007,GO:0043086,GO:0043167,GO:0043169,GO:0044092,GO:0044424,GO:0044444,GO:0044464,GO:0045934,GO:0046872,GO:0048519,GO:…	5.99.1.2	ko:K03168	-	-	-	-	ko00000,ko01000,ko03032,ko03400	-	-	-	Topoisom_bac,Toprim,Toprim_C_rpt
ENBDON_00558	1240349.ANGC01000023_gene3690	1.77e-129	369.0	COG2207@1|root,COG2207@2|Bacteria,2GWDZ@201174|Actinobacteria,4G2AR@85025|Nocardiaceae	201174|Actinobacteria	K	Helix-turn-helix domain	-	-	-	-	-	-	-	-	-	-	-	-	HTH_18
ENBDON_00559	1240349.ANGC01000023_gene3691	2.1e-57	179.0	COG0346@1|root,COG0346@2|Bacteria,2IKKR@201174|Actinobacteria,4G25N@85025|Nocardiaceae	201174|Actinobacteria	E	Glyoxalase/Bleomycin resistance protein/Dioxygenase superfamily	-	-	-	-	-	-	-	-	-	-	-	-	Glyoxalase
ENBDON_00560	1240349.ANGC01000023_gene3692	1.83e-251	696.0	COG0470@1|root,COG0470@2|Bacteria,2GJ8C@201174|Actinobacteria,4FUHP@85025|Nocardiaceae	201174|Actinobacteria	L	DNA polymerase III subunit delta	holB	GO:0005575,GO:0005622,GO:0005623,GO:0006139,GO:0006259,GO:0006260,GO:0006261,GO:0006725,GO:0006807,GO:0008150,GO:0008152,GO:0009058,GO:0009059,GO:0009360,GO:0009987,GO:0032991,GO:0034641,GO:0034645,GO:0042575,GO:0043170,GO:0044237,GO:0044238,GO:0044249,GO:0044260,GO:0044424,GO:0044464,GO:0046483,GO:0061695,GO:0071704,GO:0090304,GO:1901360,GO:1901576,GO:1902494,GO:1990234	2.7.7.7	ko:K02341	ko00230,ko00240,ko01100,ko03030,ko03430,ko03440,map00230,map00240,map01100,map03030,map03430,map03440	M00260	R00375,R00376,R00377,R00378	RC02795	ko00000,ko00001,ko00002,ko01000,ko03032,ko03400	-	-	-	DNA_pol3_delta2,DNApol3-delta_C
ENBDON_00563	1240349.ANGC01000023_gene3694	3.8e-39	130.0	28U08@1|root,2ZG6M@2|Bacteria,2GYIH@201174|Actinobacteria,4G461@85025|Nocardiaceae	201174|Actinobacteria	-	-	-	-	-	-	-	-	-	-	-	-	-	-	-
ENBDON_00567	1240349.ANGC01000037_gene3185	9.74e-83	245.0	2FEGF@1|root,317VS@2|Bacteria,2HZYT@201174|Actinobacteria,4G4QZ@85025|Nocardiaceae	201174|Actinobacteria	-	-	-	-	-	-	-	-	-	-	-	-	-	-	-
ENBDON_00568	1240349.ANGC01000037_gene3184	1.28e-139	395.0	COG1802@1|root,COG1802@2|Bacteria,2GMI2@201174|Actinobacteria,4FWTJ@85025|Nocardiaceae	201174|Actinobacteria	K	FCD	-	-	-	-	-	-	-	-	-	-	-	-	FCD,GntR
ENBDON_00569	1429046.RR21198_1261	2e-257	711.0	COG0477@1|root,COG0477@2|Bacteria,2GKVX@201174|Actinobacteria,4FUCW@85025|Nocardiaceae	201174|Actinobacteria	EGP	Sugar (and other) transporter	-	-	-	-	-	-	-	-	-	-	-	-	MFS_1
ENBDON_00570	1429046.RR21198_1260	0.0	918.0	COG0308@1|root,COG0308@2|Bacteria,2GJWF@201174|Actinobacteria,4FW2B@85025|Nocardiaceae	201174|Actinobacteria	E	Peptidase family M1 domain	pepN_1	-	-	ko:K01269	-	-	-	-	ko00000,ko01000	-	-	-	Peptidase_M1
ENBDON_00571	1240349.ANGC01000037_gene3181	0.0	2491.0	COG0110@1|root,COG1020@1|root,COG0110@2|Bacteria,COG1020@2|Bacteria,2I8TI@201174|Actinobacteria,4FVZC@85025|Nocardiaceae	201174|Actinobacteria	Q	Bacterial transferase hexapeptide (six repeats)	-	-	-	-	-	-	-	-	-	-	-	-	AMP-binding,AMP-binding_C,Hexapep,PP-binding
ENBDON_00572	1240349.ANGC01000037_gene3180	5.86e-311	848.0	COG0520@1|root,COG0520@2|Bacteria,2GMIC@201174|Actinobacteria,4FXJE@85025|Nocardiaceae	201174|Actinobacteria	E	Aminotransferase class-V	-	-	-	-	-	-	-	-	-	-	-	-	Aminotran_5
ENBDON_00573	1429046.RR21198_1257	1.5e-106	307.0	COG2606@1|root,COG2606@2|Bacteria,2IKUX@201174|Actinobacteria,4G1I3@85025|Nocardiaceae	201174|Actinobacteria	S	Aminoacyl-tRNA editing domain	-	-	-	-	-	-	-	-	-	-	-	-	tRNA_edit
ENBDON_00574	1240349.ANGC01000037_gene3178	3.05e-116	333.0	COG3195@1|root,COG3195@2|Bacteria,2GKIP@201174|Actinobacteria,4G2NT@85025|Nocardiaceae	201174|Actinobacteria	S	OHCU decarboxylase	-	-	4.1.1.97	ko:K16840	ko00230,ko01100,ko01120,map00230,map01100,map01120	M00546	R06604	RC01551	ko00000,ko00001,ko00002,ko01000	-	-	-	OHCU_decarbox
ENBDON_00575	1240349.ANGC01000037_gene3177	2.13e-192	534.0	COG1024@1|root,COG1024@2|Bacteria,2GJG7@201174|Actinobacteria,4FU9K@85025|Nocardiaceae	201174|Actinobacteria	I	Belongs to the enoyl-CoA hydratase isomerase family	echA21	GO:0005575,GO:0005622,GO:0005623,GO:0005737,GO:0005739,GO:0005777,GO:0042579,GO:0043226,GO:0043227,GO:0043229,GO:0043231,GO:0044424,GO:0044444,GO:0044464	4.2.1.17	ko:K01692	ko00071,ko00280,ko00281,ko00310,ko00360,ko00362,ko00380,ko00410,ko00627,ko00640,ko00650,ko00903,ko00930,ko01100,ko01110,ko01120,ko01130,ko01212,map00071,map00280,map00281,map00310,map00360,map00362,map00380,map00410,map00627,map00640,map00650,map00903,map00930,map01100,map01110,map01120,map01130,map01212	M00032,M00087	R03026,R03045,R04137,R04170,R04204,R04224,R04738,R04740,R04744,R04746,R04749,R05595,R06411,R06412,R06942,R08093	RC00831,RC00834,RC01086,RC01095,RC01098,RC01103,RC01217,RC02115	ko00000,ko00001,ko00002,ko01000	-	-	-	ECH_1
ENBDON_00576	1429046.RR21198_1254	3.99e-69	219.0	2CK59@1|root,32VV2@2|Bacteria,2I7N7@201174|Actinobacteria,4G9UM@85025|Nocardiaceae	201174|Actinobacteria	-	-	-	-	-	-	-	-	-	-	-	-	-	-	-
ENBDON_00577	1240349.ANGC01000037_gene3176	1.02e-113	335.0	COG3832@1|root,COG3832@2|Bacteria,2IBWM@201174|Actinobacteria,4G90C@85025|Nocardiaceae	201174|Actinobacteria	J	glyoxalase III activity	-	-	-	-	-	-	-	-	-	-	-	-	-
ENBDON_00578	1240349.ANGC01000037_gene3175	8.6e-118	336.0	COG0221@1|root,COG0221@2|Bacteria,2GM7F@201174|Actinobacteria,4FU4D@85025|Nocardiaceae	201174|Actinobacteria	C	Catalyzes the hydrolysis of inorganic pyrophosphate (PPi) forming two phosphate ions	ppa	GO:0000287,GO:0003674,GO:0003824,GO:0004427,GO:0005488,GO:0005575,GO:0005622,GO:0005623,GO:0005737,GO:0005829,GO:0005886,GO:0006793,GO:0006796,GO:0008150,GO:0008152,GO:0009987,GO:0016020,GO:0016462,GO:0016787,GO:0016817,GO:0016818,GO:0043167,GO:0043169,GO:0044237,GO:0044424,GO:0044444,GO:0044464,GO:0046872,GO:0071944	3.6.1.1	ko:K01507	ko00190,map00190	-	-	-	ko00000,ko00001,ko01000	-	-	iNJ661.Rv3628	Pyrophosphatase
ENBDON_00579	1240349.ANGC01000037_gene3174	9.85e-290	796.0	COG2027@1|root,COG2027@2|Bacteria,2GJPH@201174|Actinobacteria,4FW4K@85025|Nocardiaceae	201174|Actinobacteria	M	D-Ala-D-Ala carboxypeptidase 3 (S13) family	dacB	-	3.4.16.4	ko:K07259	ko00550,map00550	-	-	-	ko00000,ko00001,ko01000,ko01002,ko01011	-	-	-	Peptidase_S13
ENBDON_00580	1240349.ANGC01000037_gene3173	8.52e-246	675.0	COG5282@1|root,COG5282@2|Bacteria,2GJ8E@201174|Actinobacteria,4FV9J@85025|Nocardiaceae	201174|Actinobacteria	S	Zincin-like metallopeptidase	-	-	-	-	-	-	-	-	-	-	-	-	Zincin_2
ENBDON_00581	1240349.ANGC01000037_gene3172	9.22e-222	613.0	COG0037@1|root,COG0037@2|Bacteria,2GJR4@201174|Actinobacteria,4FW91@85025|Nocardiaceae	201174|Actinobacteria	D	Ligates lysine onto the cytidine present at position 34 of the AUA codon-specific tRNA(Ile) that contains the anticodon CAU, in an ATP-dependent manner. Cytidine is converted to lysidine, thus changing the amino acid specificity of the tRNA from methionine to isoleucine	tilS	GO:0008150,GO:0040007	2.4.2.8,6.3.4.19	ko:K00760,ko:K04075	ko00230,ko00983,ko01100,ko01110,map00230,map00983,map01100,map01110	-	R00190,R01132,R01229,R02142,R08237,R08238,R08245,R09597	RC00063,RC00122,RC02633,RC02634	ko00000,ko00001,ko01000,ko03016	-	-	-	ATP_bind_3,TilS
ENBDON_00582	1240349.ANGC01000037_gene3171	9.66e-129	366.0	COG0634@1|root,COG0634@2|Bacteria,2GMDZ@201174|Actinobacteria,4FY12@85025|Nocardiaceae	201174|Actinobacteria	F	Belongs to the purine pyrimidine phosphoribosyltransferase family	hpt	GO:0003674,GO:0003824,GO:0004422,GO:0006139,GO:0006163,GO:0006164,GO:0006177,GO:0006188,GO:0006725,GO:0006753,GO:0006793,GO:0006796,GO:0006807,GO:0008150,GO:0008152,GO:0009058,GO:0009116,GO:0009117,GO:0009119,GO:0009123,GO:0009124,GO:0009126,GO:0009127,GO:0009150,GO:0009152,GO:0009156,GO:0009161,GO:0009163,GO:0009165,GO:0009167,GO:0009168,GO:0009259,GO:0009260,GO:0009987,GO:0016740,GO:0016757,GO:…	2.4.2.8	ko:K00760	ko00230,ko00983,ko01100,ko01110,map00230,map00983,map01100,map01110	-	R00190,R01132,R01229,R02142,R08237,R08238,R08245	RC00063,RC00122	ko00000,ko00001,ko01000	-	-	-	Pribosyltran
ENBDON_00583	1240349.ANGC01000037_gene3170	0.0	1213.0	COG0515@1|root,COG0515@2|Bacteria,2IB7Q@201174|Actinobacteria,4FU7Q@85025|Nocardiaceae	201174|Actinobacteria	KLT	Protein tyrosine kinase	-	-	-	-	-	-	-	-	-	-	-	-	Pkinase
ENBDON_00584	1240349.ANGC01000037_gene3169	0.0	1424.0	COG0465@1|root,COG0465@2|Bacteria,2GJ4Q@201174|Actinobacteria,4FVET@85025|Nocardiaceae	201174|Actinobacteria	O	Acts as a processive, ATP-dependent zinc metallopeptidase for both cytoplasmic and membrane proteins. Plays a role in the quality control of integral membrane proteins	ftsH	GO:0003674,GO:0003824,GO:0004176,GO:0005575,GO:0005622,GO:0005623,GO:0005737,GO:0005829,GO:0005886,GO:0006508,GO:0006807,GO:0006950,GO:0006979,GO:0008150,GO:0008152,GO:0008233,GO:0008237,GO:0009056,GO:0009057,GO:0010468,GO:0016020,GO:0016462,GO:0016787,GO:0016817,GO:0016818,GO:0016887,GO:0017111,GO:0019222,GO:0019538,GO:0030163,GO:0040007,GO:0042623,GO:0043170,GO:0044238,GO:0044424,GO:0044444,GO:…	-	ko:K03798	-	M00742	-	-	ko00000,ko00002,ko01000,ko01002,ko03110	-	-	-	AAA,FtsH_ext,Peptidase_M41
ENBDON_00585	1240349.ANGC01000037_gene3168	1.75e-148	418.0	COG0302@1|root,COG0302@2|Bacteria,2GP2P@201174|Actinobacteria,4FX8Q@85025|Nocardiaceae	201174|Actinobacteria	H	GTP cyclohydrolase	folE	GO:0000166,GO:0001882,GO:0001883,GO:0003674,GO:0003824,GO:0003933,GO:0003934,GO:0005488,GO:0005525,GO:0005575,GO:0005622,GO:0005623,GO:0005737,GO:0006066,GO:0006725,GO:0006729,GO:0006732,GO:0006807,GO:0008150,GO:0008152,GO:0008270,GO:0009058,GO:0009108,GO:0009987,GO:0016787,GO:0016810,GO:0016814,GO:0017076,GO:0017144,GO:0018130,GO:0019001,GO:0019238,GO:0019438,GO:0019751,GO:0032549,GO:0032550,GO:…	3.5.4.16	ko:K01495	ko00790,ko01100,map00790,map01100	M00126,M00841,M00842,M00843	R00428,R04639,R05046,R05048	RC00263,RC00294,RC00323,RC00945,RC01188	ko00000,ko00001,ko00002,ko01000	-	-	iNJ661.Rv3609c	GTP_cyclohydroI
ENBDON_00586	1240349.ANGC01000037_gene3167	1.28e-193	538.0	COG0294@1|root,COG0294@2|Bacteria,2GJDQ@201174|Actinobacteria,4FUWS@85025|Nocardiaceae	201174|Actinobacteria	H	Catalyzes the condensation of para-aminobenzoate (pABA) with 6-hydroxymethyl-7,8-dihydropterin diphosphate (DHPt-PP) to form 7,8-dihydropteroate (H2Pte), the immediate precursor of folate derivatives	folP	GO:0003674,GO:0003824,GO:0004156,GO:0005575,GO:0005622,GO:0005623,GO:0005737,GO:0005829,GO:0006082,GO:0006575,GO:0006725,GO:0006732,GO:0006760,GO:0006807,GO:0008150,GO:0008152,GO:0009058,GO:0009108,GO:0009396,GO:0009987,GO:0016053,GO:0016740,GO:0016765,GO:0018130,GO:0019438,GO:0019752,GO:0034641,GO:0040007,GO:0042398,GO:0042558,GO:0042559,GO:0043436,GO:0043603,GO:0043604,GO:0044237,GO:0044249,GO:…	2.5.1.15	ko:K00796	ko00790,ko01100,map00790,map01100	M00126,M00841	R03066,R03067	RC00121,RC00842	ko00000,ko00001,ko00002,ko01000	-	-	-	Pterin_bind
ENBDON_00587	1429046.RR21198_1244	2.98e-78	233.0	COG1539@1|root,COG1539@2|Bacteria,2IHSW@201174|Actinobacteria,4G2EK@85025|Nocardiaceae	201174|Actinobacteria	H	Catalyzes the conversion of 7,8-dihydroneopterin to 6- hydroxymethyl-7,8-dihydropterin	folB	GO:0008150,GO:0040007	1.13.11.81,2.7.6.3,4.1.2.25,5.1.99.8	ko:K01633,ko:K13940	ko00790,ko01100,map00790,map01100	M00126,M00840	R03503,R03504,R11037,R11073	RC00002,RC00017,RC00721,RC00943,RC01479,RC03333,RC03334	ko00000,ko00001,ko00002,ko01000	-	-	-	FolB
ENBDON_00588	1240349.ANGC01000037_gene3165	3.57e-120	343.0	COG0801@1|root,COG0801@2|Bacteria,2H3G6@201174|Actinobacteria,4G1BM@85025|Nocardiaceae	201174|Actinobacteria	H	7,8-dihydro-6-hydroxymethylpterin-pyrophosphokinase (HPPK)	folK	-	2.7.6.3,4.1.2.25	ko:K00950,ko:K13940	ko00790,ko01100,map00790,map01100	M00126,M00841	R03503,R03504	RC00002,RC00017,RC00721,RC00943	ko00000,ko00001,ko00002,ko01000	-	-	-	FolB,HPPK
ENBDON_00589	1240349.ANGC01000037_gene3164	6.13e-100	290.0	2DRQG@1|root,33CMQ@2|Bacteria,2IFEG@201174|Actinobacteria,4G1JI@85025|Nocardiaceae	201174|Actinobacteria	S	Protein of unknown function (DUF3180)	-	-	-	-	-	-	-	-	-	-	-	-	DUF3180
ENBDON_00590	1240349.ANGC01000037_gene3163	5.65e-133	385.0	2F5G1@1|root,33Y1Q@2|Bacteria,2HVSF@201174|Actinobacteria,4FXAA@85025|Nocardiaceae	201174|Actinobacteria	-	-	-	-	-	-	-	-	-	-	-	-	-	-	-
ENBDON_00591	1429046.RR21198_1240	2.13e-205	570.0	COG5495@1|root,COG5495@2|Bacteria,2I2F6@201174|Actinobacteria,4FTX6@85025|Nocardiaceae	201174|Actinobacteria	S	Domain of unknown function (DUF2520)	-	-	-	-	-	-	-	-	-	-	-	-	DUF2520,Rossmann-like
ENBDON_00592	1429046.RR21198_1239	1.15e-210	583.0	COG0414@1|root,COG0414@2|Bacteria,2GJEQ@201174|Actinobacteria,4FUUB@85025|Nocardiaceae	201174|Actinobacteria	H	Catalyzes the condensation of pantoate with beta-alanine in an ATP-dependent reaction via a pantoyl-adenylate intermediate	panC	GO:0000166,GO:0000287,GO:0001505,GO:0003674,GO:0003824,GO:0004592,GO:0005488,GO:0005524,GO:0005575,GO:0005622,GO:0005623,GO:0005737,GO:0005829,GO:0006082,GO:0006520,GO:0006573,GO:0006575,GO:0006732,GO:0006766,GO:0006767,GO:0006807,GO:0008144,GO:0008150,GO:0008152,GO:0009058,GO:0009081,GO:0009108,GO:0009110,GO:0009987,GO:0015939,GO:0015940,GO:0016053,GO:0016874,GO:0016879,GO:0016881,GO:0017076,GO:…	6.3.2.1	ko:K01918	ko00410,ko00770,ko01100,ko01110,map00410,map00770,map01100,map01110	M00119	R02473	RC00096,RC00141	ko00000,ko00001,ko00002,ko01000	-	-	iNJ661.Rv3602c	Pantoate_ligase
ENBDON_00593	1240349.ANGC01000037_gene3160	2.11e-98	286.0	COG0853@1|root,COG0853@2|Bacteria,2IHTC@201174|Actinobacteria,4G0QD@85025|Nocardiaceae	201174|Actinobacteria	H	Catalyzes the pyruvoyl-dependent decarboxylation of aspartate to produce beta-alanine	panD	GO:0003674,GO:0003824,GO:0004068,GO:0005575,GO:0005618,GO:0005622,GO:0005623,GO:0005737,GO:0005829,GO:0006082,GO:0006520,GO:0006522,GO:0006523,GO:0006575,GO:0006732,GO:0006766,GO:0006767,GO:0006807,GO:0008150,GO:0008152,GO:0008652,GO:0009058,GO:0009078,GO:0009079,GO:0009108,GO:0009110,GO:0009987,GO:0015939,GO:0015940,GO:0016053,GO:0016829,GO:0016830,GO:0016831,GO:0019752,GO:0030312,GO:0032787,GO:…	4.1.1.11	ko:K01579	ko00410,ko00770,ko01100,ko01110,map00410,map00770,map01100,map01110	M00119	R00489	RC00299	ko00000,ko00001,ko00002,ko01000	-	-	-	Asp_decarbox
ENBDON_00594	1240349.ANGC01000037_gene3159	9.07e-196	543.0	COG1521@1|root,COG1521@2|Bacteria,2GMRQ@201174|Actinobacteria,4FUHR@85025|Nocardiaceae	201174|Actinobacteria	K	Catalyzes the phosphorylation of pantothenate (Pan), the first step in CoA biosynthesis	coaX	GO:0005575,GO:0005623,GO:0005886,GO:0016020,GO:0044464,GO:0071944	2.7.1.33	ko:K03525	ko00770,ko01100,map00770,map01100	M00120	R02971,R03018,R04391	RC00002,RC00017	ko00000,ko00001,ko00002,ko01000	-	-	-	Pan_kinase
ENBDON_00595	1240349.ANGC01000037_gene3158	4.21e-90	265.0	COG0607@1|root,COG0607@2|Bacteria,2IKTC@201174|Actinobacteria,4G0UW@85025|Nocardiaceae	201174|Actinobacteria	P	Rhodanese Homology Domain	-	-	-	-	-	-	-	-	-	-	-	-	Rhodanese
ENBDON_00596	1240349.ANGC01000037_gene3157	0.0	992.0	COG1190@1|root,COG1190@2|Bacteria,2GKE0@201174|Actinobacteria,4FUH1@85025|Nocardiaceae	201174|Actinobacteria	J	Belongs to the class-II aminoacyl-tRNA synthetase family	lysS	GO:0008150,GO:0040007	6.1.1.6	ko:K04567	ko00970,map00970	M00359,M00360	R03658	RC00055,RC00523	ko00000,ko00001,ko00002,ko01000,ko01007,ko03016	-	-	-	tRNA-synt_2,tRNA_anti-codon
ENBDON_00597	1429046.RR21198_1234	1.39e-72	218.0	2C4MW@1|root,32RKK@2|Bacteria,2IQ6A@201174|Actinobacteria,4G1ER@85025|Nocardiaceae	201174|Actinobacteria	S	Lsr2	lsr2	GO:0000302,GO:0003674,GO:0003676,GO:0003677,GO:0005488,GO:0005575,GO:0005618,GO:0005622,GO:0005623,GO:0005737,GO:0005829,GO:0005886,GO:0006139,GO:0006259,GO:0006355,GO:0006725,GO:0006807,GO:0006950,GO:0006979,GO:0007154,GO:0008150,GO:0008152,GO:0009405,GO:0009605,GO:0009628,GO:0009636,GO:0009889,GO:0009987,GO:0009991,GO:0010035,GO:0010038,GO:0010039,GO:0010468,GO:0010556,GO:0016020,GO:0019219,GO:…	-	-	-	-	-	-	-	-	-	-	Lsr2
ENBDON_00598	1240349.ANGC01000037_gene3155	0.0	953.0	COG1502@1|root,COG1502@2|Bacteria,2GN2V@201174|Actinobacteria,4FXZX@85025|Nocardiaceae	201174|Actinobacteria	I	Phospholipase D. Active site motifs.	-	-	3.1.4.4	ko:K01115	ko00564,ko00565,ko01100,ko01110,ko04014,ko04024,ko04071,ko04072,ko04144,ko04666,ko04724,ko04912,ko05231,map00564,map00565,map01100,map01110,map04014,map04024,map04071,map04072,map04144,map04666,map04724,map04912,map05231	-	R01310,R02051,R07385	RC00017,RC00425	ko00000,ko00001,ko01000,ko04131	-	-	-	PLDc,PLDc_2
ENBDON_00599	1240349.ANGC01000037_gene3154	0.0	1613.0	COG0542@1|root,COG0542@2|Bacteria,2GJ77@201174|Actinobacteria,4FUFV@85025|Nocardiaceae	201174|Actinobacteria	O	C-terminal, D2-small domain, of ClpB protein	clpC	GO:0003674,GO:0003824,GO:0005488,GO:0005515,GO:0005575,GO:0005618,GO:0005622,GO:0005623,GO:0005737,GO:0005829,GO:0005886,GO:0006457,GO:0008150,GO:0009987,GO:0016020,GO:0016462,GO:0016787,GO:0016817,GO:0016818,GO:0016887,GO:0017111,GO:0030312,GO:0040007,GO:0042802,GO:0042803,GO:0044183,GO:0044424,GO:0044444,GO:0044464,GO:0046983,GO:0071944	-	ko:K03696	ko01100,map01100	-	-	-	ko00000,ko03110	-	-	-	AAA,AAA_2,ClpB_D2-small,Clp_N,UVR
ENBDON_00600	1240349.ANGC01000037_gene3153	4.53e-132	375.0	COG1576@1|root,COG1576@2|Bacteria,2HHX9@201174|Actinobacteria,4G1G6@85025|Nocardiaceae	201174|Actinobacteria	J	Mycothiol maleylpyruvate isomerase N-terminal domain	-	-	-	-	-	-	-	-	-	-	-	-	MDMPI_N
ENBDON_00601	1429046.RR21198_1230	1.32e-201	561.0	COG2378@1|root,COG2378@2|Bacteria,2GKFU@201174|Actinobacteria,4FXI2@85025|Nocardiaceae	201174|Actinobacteria	K	WYL domain	-	-	-	-	-	-	-	-	-	-	-	-	HTH_11,WYL
ENBDON_00602	1240349.ANGC01000037_gene3151	4.33e-176	492.0	COG2120@1|root,COG2120@2|Bacteria,2IDT2@201174|Actinobacteria,4G0KD@85025|Nocardiaceae	201174|Actinobacteria	S	GlcNAc-PI de-N-acetylase	-	-	-	ko:K22135	-	-	-	-	ko00000,ko01000	-	-	-	PIG-L
ENBDON_00603	1240349.ANGC01000037_gene3150	4.73e-285	779.0	COG1960@1|root,COG1960@2|Bacteria,2HHFP@201174|Actinobacteria,4FYH6@85025|Nocardiaceae	201174|Actinobacteria	I	Acyl-CoA dehydrogenase, C-terminal domain	-	-	-	-	-	-	-	-	-	-	-	-	Acyl-CoA_dh_2,Acyl-CoA_dh_N
ENBDON_00604	1240349.ANGC01000037_gene3149	0.0	1734.0	COG3629@1|root,COG3903@1|root,COG3629@2|Bacteria,COG3903@2|Bacteria,2GIZ1@201174|Actinobacteria,4FW35@85025|Nocardiaceae	201174|Actinobacteria	K	transcriptional regulator	-	-	-	-	-	-	-	-	-	-	-	-	AAA_22,BTAD,NB-ARC,Trans_reg_C
ENBDON_00605	1240349.ANGC01000037_gene3148	1.85e-144	407.0	arCOG10607@1|root,30Y0T@2|Bacteria,2I8NG@201174|Actinobacteria,4GA1N@85025|Nocardiaceae	201174|Actinobacteria	-	-	-	-	-	-	-	-	-	-	-	-	-	-	-
ENBDON_00606	1240349.ANGC01000096_gene212	2.18e-96	281.0	COG1764@1|root,COG1764@2|Bacteria,2IFFB@201174|Actinobacteria,4G0I6@85025|Nocardiaceae	201174|Actinobacteria	O	OsmC-like protein	osmC	-	-	ko:K04063	-	-	-	-	ko00000	-	-	-	OsmC
ENBDON_00607	1240349.ANGC01000096_gene211	3.21e-115	330.0	COG4762@1|root,COG4762@2|Bacteria,2IQ4G@201174|Actinobacteria,4G0I0@85025|Nocardiaceae	201174|Actinobacteria	S	Domain of unknown function (DUF1990)	-	-	-	-	-	-	-	-	-	-	-	-	DUF1990
ENBDON_00608	1429046.RR21198_1223	3.7e-70	211.0	COG2329@1|root,COG2329@2|Bacteria,2IM1Q@201174|Actinobacteria,4G23I@85025|Nocardiaceae	201174|Actinobacteria	S	Antibiotic biosynthesis monooxygenase	mhuD	GO:0003674,GO:0003824,GO:0004392,GO:0005488,GO:0005575,GO:0005618,GO:0005623,GO:0005886,GO:0006725,GO:0006778,GO:0006787,GO:0006807,GO:0008150,GO:0008152,GO:0009056,GO:0009987,GO:0016020,GO:0016491,GO:0016705,GO:0019439,GO:0020037,GO:0030312,GO:0033013,GO:0033015,GO:0034641,GO:0042167,GO:0042168,GO:0042440,GO:0044237,GO:0044248,GO:0044270,GO:0044464,GO:0046149,GO:0046483,GO:0046700,GO:0046906,GO:…	1.14.99.57	ko:K21481	-	-	-	-	ko00000,ko01000	-	-	-	ABM
ENBDON_00609	1240349.ANGC01000096_gene209	5.71e-187	518.0	COG2267@1|root,COG2267@2|Bacteria,2GMBV@201174|Actinobacteria,4FY24@85025|Nocardiaceae	201174|Actinobacteria	I	Serine aminopeptidase, S33	-	-	-	-	-	-	-	-	-	-	-	-	Abhydrolase_1,Abhydrolase_6
ENBDON_00610	1240349.ANGC01000096_gene208	5.75e-209	577.0	COG1194@1|root,COG1194@2|Bacteria,2GJD9@201174|Actinobacteria,4FVBH@85025|Nocardiaceae	201174|Actinobacteria	L	endonuclease III	mutY	GO:0003674,GO:0003824,GO:0005575,GO:0005623,GO:0005886,GO:0006139,GO:0006259,GO:0006281,GO:0006284,GO:0006725,GO:0006807,GO:0006950,GO:0006974,GO:0008150,GO:0008152,GO:0009987,GO:0016020,GO:0016787,GO:0033554,GO:0034641,GO:0043170,GO:0044237,GO:0044238,GO:0044260,GO:0044464,GO:0046483,GO:0050896,GO:0051716,GO:0071704,GO:0071944,GO:0090304,GO:1901360	-	ko:K03575	ko03410,map03410	-	-	-	ko00000,ko00001,ko01000,ko03400	-	-	-	EndIII_4Fe-2S,HhH-GPD
ENBDON_00611	1240349.ANGC01000096_gene207	2.6e-141	399.0	COG0288@1|root,COG0288@2|Bacteria,2GT5H@201174|Actinobacteria,4FWCA@85025|Nocardiaceae	201174|Actinobacteria	P	Reversible hydration of carbon dioxide	cynT	GO:0003674,GO:0003824,GO:0004089,GO:0005488,GO:0008270,GO:0016829,GO:0016835,GO:0016836,GO:0043167,GO:0043169,GO:0046872,GO:0046914	4.2.1.1	ko:K01673	ko00910,map00910	-	R00132,R10092	RC02807	ko00000,ko00001,ko01000	-	-	-	Pro_CA
ENBDON_00612	1240349.ANGC01000096_gene206	5.95e-100	299.0	COG1572@1|root,COG1572@2|Bacteria,2I2R9@201174|Actinobacteria,4FWCF@85025|Nocardiaceae	201174|Actinobacteria	NU	bacterial-type flagellum-dependent cell motility	-	-	-	-	-	-	-	-	-	-	-	-	DUF4232
ENBDON_00613	1240349.ANGC01000096_gene205	1.78e-242	668.0	COG1623@1|root,COG1623@2|Bacteria,2GJ41@201174|Actinobacteria,4FU1W@85025|Nocardiaceae	201174|Actinobacteria	L	Has also diadenylate cyclase activity, catalyzing the condensation of 2 ATP molecules into cyclic di-AMP (c-di-AMP). c- di-AMP likely acts as a signaling molecule that may couple DNA integrity with a cellular process	disA	-	2.7.7.85	ko:K07067	-	-	-	-	ko00000,ko01000	-	-	-	DisA-linker,DisA_N,HHH,HHH_2
ENBDON_00614	1429046.RR21198_1217	6.44e-94	276.0	COG2050@1|root,COG2050@2|Bacteria,2GKY1@201174|Actinobacteria,4G07Y@85025|Nocardiaceae	201174|Actinobacteria	Q	Thioesterase superfamily	-	-	-	-	-	-	-	-	-	-	-	-	4HBT
ENBDON_00615	1429046.RR21198_1216	5.71e-267	734.0	COG0389@1|root,COG0389@2|Bacteria,2GKBI@201174|Actinobacteria,4FVC1@85025|Nocardiaceae	201174|Actinobacteria	L	Poorly processive, error-prone DNA polymerase involved in untargeted mutagenesis. Copies undamaged DNA at stalled replication forks, which arise in vivo from mismatched or misaligned primer ends. These misaligned primers can be extended by PolIV. Exhibits no 3'-5' exonuclease (proofreading) activity. May be involved in translesional synthesis, in conjunction with the beta clamp from PolIII	dinP	-	2.7.7.7	ko:K02346	-	-	-	-	ko00000,ko01000,ko03400	-	-	-	IMS,IMS_C,IMS_HHH
ENBDON_00616	1240349.ANGC01000017_gene4810	0.0	888.0	COG1066@1|root,COG1066@2|Bacteria,2GMQ0@201174|Actinobacteria,4FU56@85025|Nocardiaceae	201174|Actinobacteria	O	DNA-dependent ATPase involved in processing of recombination intermediates, plays a role in repairing DNA breaks. Stimulates the branch migration of RecA-mediated strand transfer reactions, allowing the 3' invading strand to extend heteroduplex DNA faster. Binds ssDNA in the presence of ADP but not other nucleotides, has ATPase activity that is stimulated by ssDNA and various branched DNA structu…	radA	GO:0005575,GO:0005622,GO:0005623,GO:0005737,GO:0005829,GO:0044424,GO:0044444,GO:0044464	-	ko:K04485	-	-	-	-	ko00000,ko03400	-	-	-	AAA_25,ATPase,ChlI,Lon_C
ENBDON_00617	1240349.ANGC01000017_gene4809	2.45e-132	377.0	COG2847@1|root,COG2847@2|Bacteria,2GVXC@201174|Actinobacteria,4G1EM@85025|Nocardiaceae	201174|Actinobacteria	S	Copper chaperone PCu(A)C	-	-	-	-	-	-	-	-	-	-	-	-	-
ENBDON_00618	1429046.RR21198_1213	3.93e-109	314.0	COG1329@1|root,COG1329@2|Bacteria,2GKSU@201174|Actinobacteria,4FVME@85025|Nocardiaceae	201174|Actinobacteria	K	CarD-like/TRCF domain	carD	GO:0006950,GO:0007154,GO:0008150,GO:0009267,GO:0009405,GO:0009605,GO:0009987,GO:0009991,GO:0015968,GO:0031667,GO:0031668,GO:0031669,GO:0033554,GO:0040007,GO:0042594,GO:0044419,GO:0050896,GO:0051704,GO:0051716,GO:0071496	-	ko:K07736	-	-	-	-	ko00000,ko03000	-	-	-	CarD_CdnL_TRCF
ENBDON_00619	1240349.ANGC01000017_gene4807	1.19e-141	402.0	COG1211@1|root,COG1211@2|Bacteria,2GNHP@201174|Actinobacteria,4FUDQ@85025|Nocardiaceae	201174|Actinobacteria	I	Catalyzes the formation of 4-diphosphocytidyl-2-C- methyl-D-erythritol from CTP and 2-C-methyl-D-erythritol 4- phosphate (MEP)	ispD	GO:0000166,GO:0000287,GO:0001882,GO:0001884,GO:0002135,GO:0003674,GO:0003824,GO:0005488,GO:0005575,GO:0005623,GO:0005886,GO:0006081,GO:0006082,GO:0006090,GO:0006629,GO:0006644,GO:0006720,GO:0006721,GO:0006793,GO:0006796,GO:0008150,GO:0008152,GO:0008270,GO:0008299,GO:0008610,GO:0008654,GO:0009058,GO:0009240,GO:0009987,GO:0016020,GO:0016114,GO:0016740,GO:0016772,GO:0016779,GO:0019103,GO:0019288,GO:…	2.7.7.60	ko:K00991	ko00900,ko01100,ko01110,ko01130,map00900,map01100,map01110,map01130	M00096	R05633	RC00002	ko00000,ko00001,ko00002,ko01000	-	-	-	IspD
ENBDON_00620	1240349.ANGC01000017_gene4806	2.3e-106	307.0	COG0245@1|root,COG0245@2|Bacteria,2II8H@201174|Actinobacteria,4G0QE@85025|Nocardiaceae	201174|Actinobacteria	I	Involved in the biosynthesis of isopentenyl diphosphate (IPP) and dimethylallyl diphosphate (DMAPP), two major building blocks of isoprenoid compounds. Catalyzes the conversion of 4- diphosphocytidyl-2-C-methyl-D-erythritol 2-phosphate (CDP-ME2P) to 2-C-methyl-D-erythritol 2,4-cyclodiphosphate (ME-CPP) with a corresponding release of cytidine 5-monophosphate (CMP)	ispF	GO:0003674,GO:0003824,GO:0006629,GO:0006720,GO:0006721,GO:0008150,GO:0008152,GO:0008299,GO:0008610,GO:0008685,GO:0009058,GO:0009987,GO:0016114,GO:0016829,GO:0016849,GO:0040007,GO:0044237,GO:0044238,GO:0044249,GO:0044255,GO:0051483,GO:0071704,GO:1901576	2.7.7.60,4.6.1.12	ko:K01770,ko:K12506	ko00900,ko01100,ko01110,ko01130,map00900,map01100,map01110,map01130	M00096	R05633,R05637	RC00002,RC01440	ko00000,ko00001,ko00002,ko01000	-	-	iNJ661.Rv3581c	YgbB
ENBDON_00621	1240349.ANGC01000017_gene4805	0.0	949.0	COG0215@1|root,COG0215@2|Bacteria,2GJF2@201174|Actinobacteria,4FV03@85025|Nocardiaceae	201174|Actinobacteria	J	Belongs to the class-I aminoacyl-tRNA synthetase family	cysS	GO:0000166,GO:0003674,GO:0003824,GO:0004812,GO:0004817,GO:0005488,GO:0005524,GO:0005575,GO:0005622,GO:0005623,GO:0005737,GO:0005829,GO:0006082,GO:0006139,GO:0006399,GO:0006412,GO:0006418,GO:0006423,GO:0006518,GO:0006520,GO:0006725,GO:0006807,GO:0008144,GO:0008150,GO:0008152,GO:0009058,GO:0009059,GO:0009987,GO:0010467,GO:0016070,GO:0016874,GO:0016875,GO:0017076,GO:0019538,GO:0019752,GO:0030554,GO:…	6.1.1.16	ko:K01883	ko00970,map00970	M00359,M00360	R03650	RC00055,RC00523	ko00000,ko00001,ko00002,ko01000,ko01007,ko03016	-	-	-	DALR_2,tRNA-synt_1e
ENBDON_00622	1240349.ANGC01000017_gene4804	8.2e-219	605.0	COG0566@1|root,COG0566@2|Bacteria,2GJMR@201174|Actinobacteria,4FXGV@85025|Nocardiaceae	201174|Actinobacteria	J	Belongs to the class IV-like SAM-binding methyltransferase superfamily. RNA methyltransferase TrmH family	rlmB	GO:0000154,GO:0000451,GO:0000453,GO:0001510,GO:0003674,GO:0003824,GO:0005575,GO:0005622,GO:0005623,GO:0005737,GO:0005829,GO:0006139,GO:0006364,GO:0006396,GO:0006725,GO:0006807,GO:0008150,GO:0008152,GO:0008168,GO:0008171,GO:0008173,GO:0008649,GO:0008757,GO:0009451,GO:0009987,GO:0010467,GO:0016070,GO:0016072,GO:0016435,GO:0016740,GO:0016741,GO:0022613,GO:0031167,GO:0032259,GO:0034470,GO:0034641,GO:…	2.1.1.185	ko:K03218	-	-	-	-	ko00000,ko01000,ko03009	-	-	-	SpoU_methylase,SpoU_sub_bind
ENBDON_00623	1240349.ANGC01000017_gene4803	1.82e-102	297.0	2DQ2N@1|root,334HZ@2|Bacteria,2IRAQ@201174|Actinobacteria,4G59Z@85025|Nocardiaceae	201174|Actinobacteria	-	-	-	-	-	-	-	-	-	-	-	-	-	-	-
ENBDON_00624	1240349.ANGC01000017_gene4802	1.01e-185	518.0	COG1984@1|root,COG1984@2|Bacteria,2GITH@201174|Actinobacteria,4FWNM@85025|Nocardiaceae	201174|Actinobacteria	E	Allophanate hydrolase subunit 2	-	-	-	-	-	-	-	-	-	-	-	-	CT_A_B
ENBDON_00625	1240349.ANGC01000017_gene4801	1.67e-156	439.0	COG2755@1|root,COG2755@2|Bacteria,2IFV1@201174|Actinobacteria,4FYI9@85025|Nocardiaceae	201174|Actinobacteria	E	GDSL-like Lipase/Acylhydrolase family	-	-	-	-	-	-	-	-	-	-	-	-	Lipase_GDSL_2
ENBDON_00626	1240349.ANGC01000017_gene4800	5.09e-137	389.0	COG1309@1|root,COG1309@2|Bacteria,2GM45@201174|Actinobacteria,4FXEM@85025|Nocardiaceae	201174|Actinobacteria	K	PFAM regulatory protein TetR	-	-	-	-	-	-	-	-	-	-	-	-	TetR_N
ENBDON_00627	1240349.ANGC01000017_gene4799	0.0	1195.0	COG2409@1|root,COG2409@2|Bacteria,2GJ5A@201174|Actinobacteria,4FU4B@85025|Nocardiaceae	201174|Actinobacteria	S	Evidence 3 Function proposed based on presence of conserved amino acid motif, structural feature or limited homology	-	-	-	ko:K06994,ko:K20470	-	-	-	-	ko00000,ko02000	2.A.6.5.6	-	-	MMPL
ENBDON_00628	1240349.ANGC01000017_gene4798	9.21e-115	329.0	COG2898@1|root,COG2898@2|Bacteria,2IBIV@201174|Actinobacteria,4G1ZV@85025|Nocardiaceae	201174|Actinobacteria	S	Catalyzes the transfer of a lysyl group from L-lysyl- tRNA(Lys) to membrane-bound phosphatidylglycerol (PG), which produces lysylphosphatidylglycerol (LPG), a major component of the bacterial membrane with a positive net charge. LPG synthesis contributes to bacterial virulence as it is involved in the resistance mechanism against cationic antimicrobial peptides (CAMP) produces by the host's immun…	-	-	-	-	-	-	-	-	-	-	-	-	-
ENBDON_00629	1240349.ANGC01000017_gene4797	3.38e-253	696.0	COG1960@1|root,COG1960@2|Bacteria,2GM5S@201174|Actinobacteria,4FVFR@85025|Nocardiaceae	201174|Actinobacteria	I	acyl-CoA dehydrogenase activity	-	-	1.14.14.30	ko:K21281	-	-	-	-	ko00000,ko01000	-	-	-	-
ENBDON_00630	1240349.ANGC01000017_gene4796	3.08e-234	645.0	COG3320@1|root,COG3320@2|Bacteria,2I9YC@201174|Actinobacteria,4FYNW@85025|Nocardiaceae	201174|Actinobacteria	Q	Male sterility protein	-	-	-	-	-	-	-	-	-	-	-	-	NAD_binding_4
ENBDON_00631	1240349.ANGC01000017_gene4795	1.43e-291	796.0	COG4992@1|root,COG4992@2|Bacteria,2GUAV@201174|Actinobacteria,4FYDI@85025|Nocardiaceae	201174|Actinobacteria	E	Aminotransferase class-III	patA	-	2.6.1.82	ko:K09251	ko00330,ko01100,map00330,map01100	-	R01155	RC00006,RC00062	ko00000,ko00001,ko01000,ko01007	-	-	-	Aminotran_3
ENBDON_00632	1240349.ANGC01000017_gene4794	8.12e-104	300.0	COG2867@1|root,COG2867@2|Bacteria,2ISMF@201174|Actinobacteria,4G4I9@85025|Nocardiaceae	201174|Actinobacteria	I	Polyketide cyclase / dehydrase and lipid transport	-	-	-	-	-	-	-	-	-	-	-	-	Polyketide_cyc
ENBDON_00633	1240349.ANGC01000017_gene4793	3.71e-237	653.0	COG2898@1|root,COG2898@2|Bacteria,2HHM8@201174|Actinobacteria,4FZ2S@85025|Nocardiaceae	201174|Actinobacteria	S	Uncharacterised conserved protein (DUF2156)	-	-	-	-	-	-	-	-	-	-	-	-	DUF2156
ENBDON_00634	1240349.ANGC01000017_gene4792	0.0	920.0	COG0665@1|root,COG0665@2|Bacteria,2GJQ9@201174|Actinobacteria,4FW8V@85025|Nocardiaceae	201174|Actinobacteria	E	oxidoreductase	-	-	-	-	-	-	-	-	-	-	-	-	DAO
ENBDON_00635	1240349.ANGC01000017_gene4791	0.0	906.0	COG0654@1|root,COG0654@2|Bacteria,2I2TH@201174|Actinobacteria,4FW2Q@85025|Nocardiaceae	201174|Actinobacteria	CH	FAD binding domain	-	-	-	-	-	-	-	-	-	-	-	-	FAD_binding_3
ENBDON_00636	1240349.ANGC01000017_gene4790	3.48e-215	594.0	COG2267@1|root,COG2267@2|Bacteria,2HJ2M@201174|Actinobacteria,4FW0N@85025|Nocardiaceae	201174|Actinobacteria	I	alpha/beta hydrolase fold	-	-	-	-	-	-	-	-	-	-	-	-	Abhydrolase_1,Abhydrolase_6
ENBDON_00637	1240349.ANGC01000017_gene4789	6.52e-218	601.0	COG2267@1|root,COG2267@2|Bacteria,2HJ2M@201174|Actinobacteria,4G9HU@85025|Nocardiaceae	201174|Actinobacteria	I	Alpha beta hydrolase	-	-	-	-	-	-	-	-	-	-	-	-	Abhydrolase_1,Abhydrolase_6
ENBDON_00638	1240349.ANGC01000017_gene4788	0.0	1207.0	COG0644@1|root,COG0644@2|Bacteria,2GIWW@201174|Actinobacteria,4FYHC@85025|Nocardiaceae	201174|Actinobacteria	C	Tryptophan halogenase	-	-	1.14.19.49	ko:K14257	ko00253,ko00404,ko01057,ko01130,map00253,map00404,map01057,map01130	M00790,M00823	R05456,R11106,R11478	RC00949	ko00000,ko00001,ko00002,ko01000	-	-	-	Trp_halogenase
ENBDON_00639	1240349.ANGC01000017_gene4787	4.98e-279	768.0	COG0475@1|root,COG0475@2|Bacteria,2GIRC@201174|Actinobacteria,4FZKG@85025|Nocardiaceae	201174|Actinobacteria	P	COG0475 Kef-type K transport systems, membrane components	-	-	-	-	-	-	-	-	-	-	-	-	Na_H_Exchanger
ENBDON_00640	1240349.ANGC01000017_gene4786	1.33e-300	822.0	COG2124@1|root,COG2124@2|Bacteria,2GK4Z@201174|Actinobacteria,4FZ67@85025|Nocardiaceae	201174|Actinobacteria	Q	Cytochrome P450	cyp135A1	GO:0003674,GO:0003824,GO:0005575,GO:0005618,GO:0005623,GO:0006629,GO:0008150,GO:0008152,GO:0008202,GO:0016125,GO:0016491,GO:0030312,GO:0044238,GO:0044464,GO:0055114,GO:0071704,GO:0071944,GO:1901360,GO:1901615	-	-	-	-	-	-	-	-	-	-	p450
ENBDON_00641	1240349.ANGC01000017_gene4785	9.38e-180	502.0	COG4221@1|root,COG4221@2|Bacteria,2GN3I@201174|Actinobacteria,4FUGM@85025|Nocardiaceae	201174|Actinobacteria	S	Belongs to the short-chain dehydrogenases reductases (SDR) family	-	GO:0008150,GO:0009268,GO:0009628,GO:0010447,GO:0040007,GO:0044110,GO:0044116,GO:0044117,GO:0044119,GO:0044403,GO:0044419,GO:0050896,GO:0051704	-	-	-	-	-	-	-	-	-	-	adh_short
ENBDON_00642	1240349.ANGC01000017_gene4784	0.0	987.0	COG2072@1|root,COG2072@2|Bacteria,2GJEA@201174|Actinobacteria,4FVF3@85025|Nocardiaceae	201174|Actinobacteria	P	Flavin-binding monooxygenase-like	-	-	-	ko:K10215	ko00627,ko01120,map00627,map01120	-	R07836,R07837	RC02100,RC03121	ko00000,ko00001,ko01000	-	-	-	FMO-like,NAD_binding_8,Pyr_redox_2
ENBDON_00643	1240349.ANGC01000017_gene4783	6.04e-294	808.0	COG0477@1|root,COG2814@2|Bacteria,2I2US@201174|Actinobacteria,4G9HP@85025|Nocardiaceae	201174|Actinobacteria	EGP	Major Facilitator Superfamily	-	-	-	-	-	-	-	-	-	-	-	-	MFS_1
ENBDON_00644	1240349.ANGC01000017_gene4782	1.64e-269	741.0	COG2271@1|root,COG2271@2|Bacteria,2HB3P@201174|Actinobacteria,4FU4U@85025|Nocardiaceae	201174|Actinobacteria	G	Transmembrane secretion effector	-	GO:0003674,GO:0005215,GO:0006810,GO:0008150,GO:0015562,GO:0022857,GO:0042221,GO:0046677,GO:0050896,GO:0051179,GO:0051234,GO:0055085	-	-	-	-	-	-	-	-	-	-	MFS_1,MFS_3
ENBDON_00645	1240349.ANGC01000017_gene4781	0.0	2294.0	COG0145@1|root,COG0146@1|root,COG0145@2|Bacteria,COG0146@2|Bacteria,2GIYE@201174|Actinobacteria,4FVXQ@85025|Nocardiaceae	201174|Actinobacteria	EQ	Hydantoinase/oxoprolinase N-terminal region	oplA	-	3.5.2.14,3.5.2.9	ko:K01469,ko:K01473	ko00330,ko00480,ko01100,map00330,map00480,map01100	-	R00251,R03187	RC00553,RC00632	ko00000,ko00001,ko01000	-	-	iNJ661.Rv0266c	Hydant_A_N,Hydantoinase_A,Hydantoinase_B
ENBDON_00646	1240349.ANGC01000017_gene4780	7.08e-173	487.0	COG1108@1|root,COG1108@2|Bacteria,2GJ7H@201174|Actinobacteria,4FU34@85025|Nocardiaceae	201174|Actinobacteria	P	ABC 3 transport family	znuB	-	-	ko:K02075	-	M00244	-	-	ko00000,ko00002,ko02000	3.A.1.15	-	-	ABC-3
ENBDON_00647	1240349.ANGC01000017_gene4779	1.56e-204	567.0	COG1121@1|root,COG1121@2|Bacteria,2GP3A@201174|Actinobacteria,4FUER@85025|Nocardiaceae	201174|Actinobacteria	P	ABC transporter	fhuC	-	-	ko:K02074	-	M00244	-	-	ko00000,ko00002,ko02000	3.A.1.15	-	-	ABC_tran
ENBDON_00648	1240349.ANGC01000017_gene4778	4.7e-190	535.0	COG0803@1|root,COG0803@2|Bacteria,2GM1K@201174|Actinobacteria,4FWMM@85025|Nocardiaceae	201174|Actinobacteria	P	Belongs to the bacterial solute-binding protein 9 family	psaA	-	-	ko:K02077	-	M00244	-	-	ko00000,ko00002,ko02000	3.A.1.15	-	-	ZnuA
ENBDON_00649	1240349.ANGC01000017_gene4777	1.26e-254	700.0	COG1609@1|root,COG1609@2|Bacteria,2GJV7@201174|Actinobacteria,4FW9W@85025|Nocardiaceae	201174|Actinobacteria	K	helix_turn _helix lactose operon repressor	-	-	-	-	-	-	-	-	-	-	-	-	LacI,Peripla_BP_3
ENBDON_00650	1240349.ANGC01000017_gene4776	0.0	1709.0	COG1877@1|root,COG3387@1|root,COG1877@2|Bacteria,COG3387@2|Bacteria,2GJAD@201174|Actinobacteria,4FTZC@85025|Nocardiaceae	201174|Actinobacteria	G	Trehalose-phosphatase	otsB	-	3.1.3.12	ko:K01087	ko00500,ko01100,map00500,map01100	-	R02778	RC00017	ko00000,ko00001,ko01000	-	-	-	Glyco_hydro_15,Trehalose_PPase
ENBDON_00651	1240349.ANGC01000017_gene4775	1.49e-146	414.0	COG1309@1|root,COG1309@2|Bacteria,2GMPD@201174|Actinobacteria,4FV3G@85025|Nocardiaceae	201174|Actinobacteria	K	Bacterial regulatory proteins, tetR family	kstR	GO:0000976,GO:0001067,GO:0003674,GO:0003676,GO:0003677,GO:0003690,GO:0003700,GO:0005488,GO:0005515,GO:0005575,GO:0005622,GO:0005623,GO:0005737,GO:0005829,GO:0006355,GO:0008150,GO:0009889,GO:0010468,GO:0010556,GO:0019219,GO:0019222,GO:0031323,GO:0031326,GO:0042802,GO:0042803,GO:0043565,GO:0044212,GO:0044424,GO:0044444,GO:0044464,GO:0046983,GO:0050789,GO:0050794,GO:0051171,GO:0051252,GO:0060255,GO:…	-	ko:K22107	-	-	-	-	ko00000,ko03000	-	-	-	TetR_N
ENBDON_00652	1240349.ANGC01000017_gene4774	0.0	1329.0	COG1960@1|root,COG1960@2|Bacteria,2GKVN@201174|Actinobacteria,4FUIB@85025|Nocardiaceae	201174|Actinobacteria	I	acyl-CoA dehydrogenase	fadE34	GO:0005575,GO:0005623,GO:0005886,GO:0016020,GO:0044464,GO:0071944	-	-	-	-	-	-	-	-	-	-	Acyl-CoA_dh_1,Acyl-CoA_dh_M,Acyl-CoA_dh_N
ENBDON_00653	1240349.ANGC01000017_gene4773	3.47e-227	629.0	COG1960@1|root,COG1960@2|Bacteria,2H5SA@201174|Actinobacteria,4FVDM@85025|Nocardiaceae	201174|Actinobacteria	I	Acyl-CoA dehydrogenase, C-terminal domain	fadE28	GO:0000166,GO:0003674,GO:0005488,GO:0006066,GO:0006082,GO:0006629,GO:0006631,GO:0006635,GO:0006706,GO:0006707,GO:0008150,GO:0008152,GO:0008202,GO:0008203,GO:0009056,GO:0009062,GO:0009268,GO:0009405,GO:0009628,GO:0009987,GO:0016042,GO:0016054,GO:0016125,GO:0016127,GO:0019395,GO:0019752,GO:0030258,GO:0032787,GO:0033539,GO:0034440,GO:0036094,GO:0040007,GO:0043167,GO:0043168,GO:0043436,GO:0044110,GO:…	-	-	-	-	-	-	-	-	-	-	Acyl-CoA_dh_1,Acyl-CoA_dh_N
ENBDON_00654	1240349.ANGC01000017_gene4772	6.14e-280	764.0	COG1960@1|root,COG1960@2|Bacteria,2GIXS@201174|Actinobacteria,4FXMZ@85025|Nocardiaceae	201174|Actinobacteria	I	Acyl-CoA dehydrogenase, middle domain	fadE29	GO:0000166,GO:0003674,GO:0005488,GO:0006066,GO:0006082,GO:0006629,GO:0006631,GO:0006635,GO:0006706,GO:0006707,GO:0008150,GO:0008152,GO:0008202,GO:0008203,GO:0009056,GO:0009062,GO:0009987,GO:0016042,GO:0016054,GO:0016125,GO:0016127,GO:0019395,GO:0019752,GO:0030258,GO:0032787,GO:0033539,GO:0034440,GO:0036094,GO:0040007,GO:0043167,GO:0043168,GO:0043436,GO:0044110,GO:0044116,GO:0044117,GO:0044237,GO:…	-	-	-	-	-	-	-	-	-	-	Acyl-CoA_dh_1,Acyl-CoA_dh_M,Acyl-CoA_dh_N
ENBDON_00655	1240349.ANGC01000017_gene4771	2.86e-249	684.0	COG1545@1|root,COG1545@2|Bacteria,2GM2A@201174|Actinobacteria,4FWKH@85025|Nocardiaceae	201174|Actinobacteria	S	DUF35 OB-fold domain, acyl-CoA-associated	-	-	-	ko:K07068	-	-	-	-	ko00000	-	-	-	DUF35_N,MaoC_dehydrat_N,OB_aCoA_assoc
ENBDON_00656	1429046.RR21198_1193	9.12e-81	240.0	COG2030@1|root,COG2030@2|Bacteria,2IHT0@201174|Actinobacteria,4G1G3@85025|Nocardiaceae	201174|Actinobacteria	I	dehydratase	-	-	-	-	-	-	-	-	-	-	-	-	MaoC_dehydratas
ENBDON_00657	1240349.ANGC01000017_gene4769	8.57e-270	739.0	COG0183@1|root,COG0183@2|Bacteria,2GKFR@201174|Actinobacteria,4FUHK@85025|Nocardiaceae	201174|Actinobacteria	I	Thiolase, N-terminal domain	ltp2	-	-	-	-	-	-	-	-	-	-	-	Thiolase_N
ENBDON_00658	1429046.RR21198_1191	1.94e-158	445.0	COG1309@1|root,COG1309@2|Bacteria,2GP59@201174|Actinobacteria,4FV73@85025|Nocardiaceae	201174|Actinobacteria	K	Transcriptional regulator	-	-	-	-	-	-	-	-	-	-	-	-	TetR_N
ENBDON_00659	1240349.ANGC01000017_gene4767	6.73e-178	497.0	COG4221@1|root,COG4221@2|Bacteria,2I2DY@201174|Actinobacteria,4FV05@85025|Nocardiaceae	201174|Actinobacteria	S	Dehydrogenase	-	-	-	-	-	-	-	-	-	-	-	-	adh_short
ENBDON_00660	1429046.RR21198_1189	1.29e-214	595.0	COG1131@1|root,COG1131@2|Bacteria,2GIY8@201174|Actinobacteria,4FUZ1@85025|Nocardiaceae	201174|Actinobacteria	V	ABC transporter	-	-	-	ko:K01990	-	M00254	-	-	ko00000,ko00002,ko02000	3.A.1	-	-	ABC_tran,DUF4162
ENBDON_00661	1240349.ANGC01000017_gene4765	7.93e-179	499.0	COG0842@1|root,COG0842@2|Bacteria,2GKJF@201174|Actinobacteria,4FWDU@85025|Nocardiaceae	201174|Actinobacteria	V	Transport permease protein	-	-	-	ko:K01992	-	M00254	-	-	ko00000,ko00002,ko02000	3.A.1	-	-	ABC2_membrane
ENBDON_00662	1240349.ANGC01000017_gene4764	0.0	2587.0	COG0637@1|root,COG1554@1|root,COG1877@1|root,COG0637@2|Bacteria,COG1554@2|Bacteria,COG1877@2|Bacteria,2GKEV@201174|Actinobacteria,4FU49@85025|Nocardiaceae	201174|Actinobacteria	G	Glycosyl hydrolase family 65, C-terminal domain	otsB1	GO:0003674,GO:0003824,GO:0005575,GO:0005576,GO:0005618,GO:0005623,GO:0005886,GO:0016020,GO:0016787,GO:0030312,GO:0044464,GO:0071944	3.2.1.28	ko:K01194	ko00500,ko01100,map00500,map01100	-	R00010	RC00049	ko00000,ko00001,ko00537,ko01000	-	GH37	-	Glyco_hydro_65C,Glyco_hydro_65N,Glyco_hydro_65m,HAD_2,Hydrolase,Trehalose_PPase
ENBDON_00663	1429046.RR21198_1179	9.72e-98	285.0	2E4Q9@1|root,32ZIV@2|Bacteria,2II59@201174|Actinobacteria,4G2BH@85025|Nocardiaceae	201174|Actinobacteria	S	Putative transmembrane protein (PGPGW)	-	-	-	-	-	-	-	-	-	-	-	-	PGPGW
ENBDON_00664	1240349.ANGC01000017_gene4762	7.68e-60	186.0	2BKQI@1|root,32F6A@2|Bacteria,2HJRQ@201174|Actinobacteria,4G790@85025|Nocardiaceae	201174|Actinobacteria	-	-	-	-	-	-	-	-	-	-	-	-	-	-	-
ENBDON_00665	1240349.ANGC01000017_gene4761	1.86e-245	675.0	COG1752@1|root,COG1752@2|Bacteria,2HJ6N@201174|Actinobacteria,4G5HY@85025|Nocardiaceae	201174|Actinobacteria	S	Patatin-like phospholipase	-	-	-	ko:K07001	-	-	-	-	ko00000	-	-	-	Patatin
ENBDON_00666	1240349.ANGC01000017_gene4760	1.01e-252	692.0	COG4638@1|root,COG4638@2|Bacteria,2I2DT@201174|Actinobacteria,4FW3U@85025|Nocardiaceae	201174|Actinobacteria	P	Rieske [2Fe-2S] domain	crtV	-	-	-	-	-	-	-	-	-	-	-	Rieske
ENBDON_00667	1240349.ANGC01000017_gene4759	0.0	1016.0	COG3349@1|root,COG3349@2|Bacteria,2GITE@201174|Actinobacteria,4FWWV@85025|Nocardiaceae	201174|Actinobacteria	Q	Flavin containing amine oxidoreductase	crtU	-	-	ko:K09879	ko00906,map00906	-	R07541,R07560,R07857,R07858	RC01901,RC01965	ko00000,ko00001	-	-	-	Amino_oxidase
ENBDON_00668	1240349.ANGC01000017_gene4758	5.9e-42	138.0	2BGKU@1|root,32AJA@2|Bacteria,2HIWR@201174|Actinobacteria,4G4WE@85025|Nocardiaceae	201174|Actinobacteria	-	-	-	-	-	-	-	-	-	-	-	-	-	-	-
ENBDON_00669	1240349.ANGC01000017_gene4757	0.0	937.0	COG2730@1|root,COG2730@2|Bacteria,2HFQV@201174|Actinobacteria,4FY5U@85025|Nocardiaceae	201174|Actinobacteria	G	Belongs to the glycosyl hydrolase 5 (cellulase A) family	-	-	-	-	-	-	-	-	-	-	-	-	Collagen_bind_2,DUF4038
ENBDON_00670	1240349.ANGC01000017_gene4756	2e-116	344.0	COG0711@1|root,COG0711@2|Bacteria,2IQQZ@201174|Actinobacteria,4G70H@85025|Nocardiaceae	201174|Actinobacteria	C	Component of the F(0) channel, it forms part of the peripheral stalk, linking F(1) to F(0)	-	-	-	-	-	-	-	-	-	-	-	-	-
ENBDON_00671	1240349.ANGC01000017_gene4755	2.01e-71	216.0	2DMSR@1|root,32TF3@2|Bacteria,2IR08@201174|Actinobacteria	201174|Actinobacteria	S	Putative Actinobacterial Holin-X, holin superfamily III	-	-	-	-	-	-	-	-	-	-	-	-	Phage_holin_3_6
ENBDON_00672	1240349.ANGC01000017_gene4754	2.17e-58	189.0	2B9CE@1|root,322Q4@2|Bacteria,2IKT2@201174|Actinobacteria,4G71J@85025|Nocardiaceae	201174|Actinobacteria	S	Protein of unknown function (DUF3618)	-	-	-	-	-	-	-	-	-	-	-	-	DUF3618
ENBDON_00674	1240349.ANGC01000017_gene4752	3.93e-42	139.0	2AQT9@1|root,31G1A@2|Bacteria,2HJR2@201174|Actinobacteria,4G783@85025|Nocardiaceae	201174|Actinobacteria	-	-	-	-	-	-	-	-	-	-	-	-	-	-	-
ENBDON_00675	1240349.ANGC01000017_gene4751	2.59e-191	535.0	COG1397@1|root,COG1397@2|Bacteria,2IM9X@201174|Actinobacteria	201174|Actinobacteria	O	ADP-ribosylglycohydrolase	-	-	-	-	-	-	-	-	-	-	-	-	ADP_ribosyl_GH
ENBDON_00676	1240349.ANGC01000017_gene4750	3.57e-186	516.0	COG0655@1|root,COG0655@2|Bacteria,2GKTM@201174|Actinobacteria,4FTXE@85025|Nocardiaceae	201174|Actinobacteria	S	NADPH-dependent FMN reductase	-	-	-	-	-	-	-	-	-	-	-	-	FMN_red
ENBDON_00677	1240349.ANGC01000017_gene4749	1.05e-95	281.0	COG4315@1|root,COG4315@2|Bacteria,2GNDV@201174|Actinobacteria,4G0S9@85025|Nocardiaceae	201174|Actinobacteria	S	Secreted repeat of unknown function	-	-	-	-	-	-	-	-	-	-	-	-	Lipoprotein_15
ENBDON_00678	1240349.ANGC01000017_gene4748	1.88e-227	627.0	COG1793@1|root,COG1793@2|Bacteria,2IKE5@201174|Actinobacteria,4FY5T@85025|Nocardiaceae	201174|Actinobacteria	L	Protein involved in DNA binding, DNA ligase (ATP) activity, ATP binding, DNA replication, DNA repair and DNA recombination	-	-	6.5.1.1	ko:K01971	ko03450,map03450	-	R00381	RC00005	ko00000,ko00001,ko01000,ko03400	-	-	-	DNA_ligase_A_C,DNA_ligase_A_M,His_kinase,LigD_N
ENBDON_00679	1429046.RR21198_1161	6.32e-295	808.0	COG0477@1|root,COG0477@2|Bacteria,2GIYR@201174|Actinobacteria,4G005@85025|Nocardiaceae	201174|Actinobacteria	EGP	MFS/sugar transport protein	-	-	-	ko:K08172	-	-	-	-	ko00000,ko02000	2.A.1.6.6	-	-	MFS_1,Sugar_tr
ENBDON_00680	1429046.RR21198_1160	3.25e-158	446.0	COG1414@1|root,COG1414@2|Bacteria,2HGK7@201174|Actinobacteria,4FZPP@85025|Nocardiaceae	201174|Actinobacteria	K	transcriptional regulator	-	-	-	ko:K02624	-	-	-	-	ko00000,ko03000	-	-	-	HTH_IclR,IclR
ENBDON_00681	1240349.ANGC01000017_gene4743	0.0	1607.0	COG0318@1|root,COG0318@2|Bacteria,2HIY1@201174|Actinobacteria,4FW42@85025|Nocardiaceae	201174|Actinobacteria	IQ	Phosphopantetheine attachment site	-	-	-	-	-	-	-	-	-	-	-	-	AMP-binding,PP-binding
ENBDON_00682	1240349.ANGC01000017_gene4742	0.0	1175.0	COG0277@1|root,COG0277@2|Bacteria,2I8EZ@201174|Actinobacteria,4FX5I@85025|Nocardiaceae	201174|Actinobacteria	C	Cholesterol oxidase, substrate-binding	-	-	-	-	-	-	-	-	-	-	-	-	Chol_subst-bind,FAD_binding_4
ENBDON_00683	1240349.ANGC01000017_gene4741	2.6e-198	550.0	COG2030@1|root,COG2030@2|Bacteria,2GJJI@201174|Actinobacteria,4FWBV@85025|Nocardiaceae	201174|Actinobacteria	I	MaoC like domain	hsd4B	-	-	-	-	-	-	-	-	-	-	-	MaoC_dehydrat_N,MaoC_dehydratas
ENBDON_00684	1429046.RR21198_1154	0.0	1098.0	COG1053@1|root,COG1053@2|Bacteria,2GIXG@201174|Actinobacteria,4FVHG@85025|Nocardiaceae	201174|Actinobacteria	C	HI0933-like protein	kstD	-	1.3.99.4	ko:K05898	ko00984,ko01100,ko01120,map00984,map01100,map01120	-	R09884	RC00991	ko00000,ko00001,ko01000	-	-	-	FAD_binding_2
ENBDON_00685	1240349.ANGC01000104_gene992	6.61e-184	511.0	COG3971@1|root,COG3971@2|Bacteria,2GPBI@201174|Actinobacteria,4FVFE@85025|Nocardiaceae	201174|Actinobacteria	Q	hydratase	mhpD	-	4.2.1.80	ko:K02554	ko00360,ko00362,ko00621,ko00622,ko01100,ko01120,ko01220,map00360,map00362,map00621,map00622,map01100,map01120,map01220	M00545,M00569	R02601,R04781	RC00750,RC01213	br01602,ko00000,ko00001,ko00002,ko01000	-	-	-	FAA_hydrolase
ENBDON_00686	1240349.ANGC01000104_gene991	3.75e-214	592.0	COG4569@1|root,COG4569@2|Bacteria,2GKBZ@201174|Actinobacteria,4FUUC@85025|Nocardiaceae	201174|Actinobacteria	Q	Catalyzes the conversion of acetaldehyde to acetyl-CoA, using NAD( ) and coenzyme A. Is the final enzyme in the meta- cleavage pathway for the degradation of aromatic compounds	hsaG	GO:0003674,GO:0003824,GO:0008150,GO:0008152,GO:0008774,GO:0016491,GO:0016620,GO:0016903,GO:0055114	1.2.1.10	ko:K04073	ko00360,ko00362,ko00620,ko00621,ko00622,ko00650,ko01100,ko01120,ko01220,map00360,map00362,map00620,map00621,map00622,map00650,map01100,map01120,map01220	M00545,M00569	R00228,R01172	RC00004,RC00184,RC01195	br01602,ko00000,ko00001,ko00002,ko01000	-	-	iNJ661.Rv3535c	AcetDehyd-dimer,Semialdhyde_dh
ENBDON_00687	1240349.ANGC01000104_gene990	9.26e-248	681.0	COG0119@1|root,COG0119@2|Bacteria,2GJBI@201174|Actinobacteria,4FWVQ@85025|Nocardiaceae	201174|Actinobacteria	E	Catalyzes the retro-aldol cleavage of 4-hydroxy-2- oxopentanoate to pyruvate and acetaldehyde. Is involved in the meta-cleavage pathway for the degradation of aromatic compounds	bphI	GO:0005575,GO:0005618,GO:0005623,GO:0030312,GO:0044464,GO:0071944	4.1.3.39	ko:K01666	ko00360,ko00362,ko00621,ko00622,ko01100,ko01120,ko01220,map00360,map00362,map00621,map00622,map01100,map01120,map01220	M00545,M00569	R00750	RC00307,RC00371	br01602,ko00000,ko00001,ko00002,ko01000	-	-	-	DmpG_comm,HMGL-like
ENBDON_00688	1429046.RR21198_1150	3.05e-56	176.0	2E26Z@1|root,32XDB@2|Bacteria,2IKVJ@201174|Actinobacteria,4G2YW@85025|Nocardiaceae	201174|Actinobacteria	-	-	-	-	-	-	-	-	-	-	-	-	-	-	-
ENBDON_00689	1240349.ANGC01000011_gene251	0.0	885.0	COG5361@1|root,COG5361@2|Bacteria,2GRDZ@201174|Actinobacteria,4FZDW@85025|Nocardiaceae	201174|Actinobacteria	S	Protein of unknown function (DUF1254)	-	-	-	-	-	-	-	-	-	-	-	-	DUF1214,DUF1254
ENBDON_00690	1429046.RR21198_1147	2.01e-149	422.0	COG2197@1|root,COG2197@2|Bacteria,2GJ46@201174|Actinobacteria,4FWRZ@85025|Nocardiaceae	201174|Actinobacteria	T	cheY-homologous receiver domain	-	-	-	-	-	-	-	-	-	-	-	-	GerE,Response_reg
ENBDON_00691	1240349.ANGC01000018_gene816	2.95e-268	738.0	COG4585@1|root,COG4585@2|Bacteria,2GKV2@201174|Actinobacteria,4G8KN@85025|Nocardiaceae	201174|Actinobacteria	T	Histidine kinase	-	-	-	-	-	-	-	-	-	-	-	-	HATPase_c,HATPase_c_2,HisKA_3
ENBDON_00692	1429046.RR21198_1145	3.26e-31	115.0	2BI68@1|root,32CBH@2|Bacteria,2HWMI@201174|Actinobacteria,4G3CN@85025|Nocardiaceae	201174|Actinobacteria	-	-	-	-	-	-	-	-	-	-	-	-	-	-	-
ENBDON_00693	1240349.ANGC01000018_gene818	0.0	922.0	COG0397@1|root,COG0397@2|Bacteria,2GNRX@201174|Actinobacteria,4FYUI@85025|Nocardiaceae	201174|Actinobacteria	S	Belongs to the UPF0061 (SELO) family	-	-	-	-	-	-	-	-	-	-	-	-	UPF0061
ENBDON_00694	1240349.ANGC01000018_gene819	1.77e-151	426.0	COG0262@1|root,COG0262@2|Bacteria,2GYU7@201174|Actinobacteria,4G0RJ@85025|Nocardiaceae	201174|Actinobacteria	H	RibD C-terminal domain	-	-	-	-	-	-	-	-	-	-	-	-	RibD_C
ENBDON_00695	1240349.ANGC01000004_gene1749	1.92e-132	378.0	COG1309@1|root,COG1309@2|Bacteria,2IRFG@201174|Actinobacteria,4FY19@85025|Nocardiaceae	201174|Actinobacteria	K	Bacterial regulatory proteins, tetR family	-	-	-	-	-	-	-	-	-	-	-	-	TetR_N
ENBDON_00696	1240349.ANGC01000004_gene1750	7.51e-271	744.0	COG3832@1|root,COG3832@2|Bacteria,2IDAT@201174|Actinobacteria,4FZHN@85025|Nocardiaceae	201174|Actinobacteria	S	Hemerythrin HHE cation binding domain	-	-	-	-	-	-	-	-	-	-	-	-	Hemerythrin,Polyketide_cyc2
ENBDON_00697	1429046.RR21198_4914	6.88e-282	775.0	COG2230@1|root,COG2230@2|Bacteria,2GJ94@201174|Actinobacteria,4FWHU@85025|Nocardiaceae	201174|Actinobacteria	M	cyclopropane-fatty-acyl-phospholipid synthase	cfa	-	2.1.1.79	ko:K00574	-	-	-	-	ko00000,ko01000	-	-	-	CMAS
ENBDON_00698	1283283.ATXA01000001_gene326	1.56e-68	209.0	COG0346@1|root,COG0346@2|Bacteria,2IKRF@201174|Actinobacteria	201174|Actinobacteria	E	glyoxalase bleomycin resistance protein dioxygenase	-	-	-	-	-	-	-	-	-	-	-	-	Glyoxalase
ENBDON_00699	258052.JNYV01000001_gene42	6.56e-28	105.0	2C4MW@1|root,32RKK@2|Bacteria,2IQ6A@201174|Actinobacteria	201174|Actinobacteria	S	pathogenesis	lsr2	-	-	-	-	-	-	-	-	-	-	-	Lsr2
ENBDON_00701	1429046.RR21198_5953	3.22e-48	155.0	COG2261@1|root,COG2261@2|Bacteria,2GSMN@201174|Actinobacteria,4G323@85025|Nocardiaceae	201174|Actinobacteria	S	Transglycosylase associated protein	-	-	-	-	-	-	-	-	-	-	-	-	Transgly_assoc
ENBDON_00702	331869.BAL199_08823	5.17e-72	230.0	COG2897@1|root,COG2897@2|Bacteria,1MW4B@1224|Proteobacteria,2TR9R@28211|Alphaproteobacteria,4BPYE@82117|unclassified Alphaproteobacteria	28211|Alphaproteobacteria	P	Rhodanese Homology Domain	-	-	2.8.1.1,2.8.1.2	ko:K01011	ko00270,ko00920,ko01100,ko01120,ko04122,map00270,map00920,map01100,map01120,map04122	-	R01931,R03105,R03106	RC00214	ko00000,ko00001,ko01000	-	-	-	Rhodanese
ENBDON_00703	136273.GY22_16965	9.48e-26	99.4	COG2801@1|root,COG2801@2|Bacteria,2GKW1@201174|Actinobacteria,1W7H6@1268|Micrococcaceae	201174|Actinobacteria	L	PFAM Integrase catalytic	-	-	-	-	-	-	-	-	-	-	-	-	rve,rve_2,rve_3
ENBDON_00704	1435356.Y013_04825	6.04e-56	175.0	COG2963@1|root,COG2963@2|Bacteria,2IM3S@201174|Actinobacteria,4G2GR@85025|Nocardiaceae	201174|Actinobacteria	L	Transposase	-	-	-	-	-	-	-	-	-	-	-	-	HTH_Tnp_1
ENBDON_00706	1449069.JMLO01000021_gene3040	1.94e-150	427.0	COG0842@1|root,COG0842@2|Bacteria,2GX2M@201174|Actinobacteria,4FU46@85025|Nocardiaceae	201174|Actinobacteria	V	Transport permease protein	-	-	-	ko:K01992	-	M00254	-	-	ko00000,ko00002,ko02000	3.A.1	-	-	ABC2_membrane
ENBDON_00707	1449069.JMLO01000021_gene3041	9.15e-194	540.0	COG1131@1|root,COG1131@2|Bacteria,2H2U9@201174|Actinobacteria,4FYGN@85025|Nocardiaceae	201174|Actinobacteria	V	Protein involved in transcription factor activity, ATP binding, drug transporter activity, ATPase activity, metal ion binding, regulation of transcription, DNA-dependent, drug transport, metal ion transport, defense response to pathogen and response to antibiotic	-	-	-	ko:K01990	-	M00254	-	-	ko00000,ko00002,ko02000	3.A.1	-	-	ABC_tran,DUF4162
ENBDON_00708	1429046.RR21198_1140	7.12e-56	174.0	COG3695@1|root,COG3695@2|Bacteria,2HIKR@201174|Actinobacteria,4G4AB@85025|Nocardiaceae	201174|Actinobacteria	L	6-O-methylguanine DNA methyltransferase, DNA binding domain	-	-	-	-	-	-	-	-	-	-	-	-	DNA_binding_1
ENBDON_00709	1240349.ANGC01000018_gene821	4.77e-77	229.0	28XG2@1|root,34449@2|Bacteria,2GR6I@201174|Actinobacteria,4G2R3@85025|Nocardiaceae	201174|Actinobacteria	-	-	-	-	-	-	-	-	-	-	-	-	-	-	-
ENBDON_00710	1240349.ANGC01000018_gene822	3.09e-292	795.0	COG4638@1|root,COG4638@2|Bacteria,2GKMV@201174|Actinobacteria,4FUJ5@85025|Nocardiaceae	201174|Actinobacteria	P	Rieske [2Fe-2S] domain	kshA	GO:0003674,GO:0003824,GO:0004497,GO:0005488,GO:0005506,GO:0006066,GO:0006629,GO:0006694,GO:0006706,GO:0006707,GO:0008150,GO:0008152,GO:0008202,GO:0008203,GO:0008610,GO:0009056,GO:0009058,GO:0009405,GO:0009987,GO:0010033,GO:0014070,GO:0016042,GO:0016043,GO:0016125,GO:0016127,GO:0016491,GO:0016705,GO:0016709,GO:0022607,GO:0033993,GO:0036200,GO:0036314,GO:0042221,GO:0043167,GO:0043169,GO:0043933,GO:…	1.14.13.142	ko:K15982	ko00984,ko01100,ko01120,map00984,map01100,map01120	-	R09860	RC02691	ko00000,ko00001,ko01000	-	-	-	Rieske
ENBDON_00711	1240349.ANGC01000018_gene823	1.65e-288	787.0	COG1960@1|root,COG1960@2|Bacteria,2GMKM@201174|Actinobacteria,4FUGK@85025|Nocardiaceae	201174|Actinobacteria	I	Acyl-CoA dehydrogenase, C-terminal domain	hsaA	GO:0000166,GO:0003674,GO:0003824,GO:0004497,GO:0005488,GO:0005575,GO:0005623,GO:0005886,GO:0006066,GO:0006629,GO:0006694,GO:0006706,GO:0006707,GO:0008150,GO:0008152,GO:0008202,GO:0008203,GO:0008610,GO:0009056,GO:0009058,GO:0016020,GO:0016042,GO:0016125,GO:0016127,GO:0016491,GO:0016705,GO:0016712,GO:0036094,GO:0040007,GO:0043167,GO:0043168,GO:0044110,GO:0044116,GO:0044117,GO:0044238,GO:0044281,GO:…	1.14.14.12	ko:K16047	ko00984,ko01100,ko01120,map00984,map01100,map01120	-	R09819	RC00236	ko00000,ko00001,ko01000	-	-	-	Acyl-CoA_dh_2,Acyl-CoA_dh_N
ENBDON_00712	1240349.ANGC01000018_gene824	3.21e-212	586.0	COG2267@1|root,COG2267@2|Bacteria,2H6J4@201174|Actinobacteria,4FWMQ@85025|Nocardiaceae	201174|Actinobacteria	I	Serine aminopeptidase, S33	hsaD	GO:0003674,GO:0003824,GO:0005575,GO:0005618,GO:0005623,GO:0005886,GO:0008150,GO:0016020,GO:0016787,GO:0016822,GO:0016823,GO:0030312,GO:0034820,GO:0040007,GO:0044110,GO:0044116,GO:0044117,GO:0044403,GO:0044419,GO:0044464,GO:0051704,GO:0071944	3.1.1.24,3.7.1.17	ko:K01055,ko:K16050	ko00362,ko00984,ko01100,ko01120,ko01220,map00362,map00984,map01100,map01120,map01220	M00568	R02991,R09883	RC00825,RC02018,RC02740	ko00000,ko00001,ko00002,ko01000	-	-	-	Abhydrolase_1,Abhydrolase_6
ENBDON_00713	1240349.ANGC01000018_gene825	6.57e-224	616.0	COG0346@1|root,COG0346@2|Bacteria,2GM8H@201174|Actinobacteria,4FV6W@85025|Nocardiaceae	201174|Actinobacteria	E	Glyoxalase/Bleomycin resistance protein/Dioxygenase superfamily	hsaC	GO:0003674,GO:0003824,GO:0005488,GO:0005506,GO:0006066,GO:0006629,GO:0006706,GO:0006707,GO:0008150,GO:0008152,GO:0008202,GO:0008203,GO:0009056,GO:0009405,GO:0010033,GO:0014070,GO:0016042,GO:0016125,GO:0016127,GO:0016491,GO:0016701,GO:0016702,GO:0033993,GO:0036314,GO:0042221,GO:0043167,GO:0043169,GO:0044238,GO:0044281,GO:0044282,GO:0044419,GO:0046164,GO:0046872,GO:0046914,GO:0047071,GO:0050896,GO:…	1.13.11.25	ko:K16049	ko00984,ko01100,ko01120,ko01220,map00984,map01100,map01120,map01220	-	R04597	RC01610	ko00000,ko00001,ko01000	-	-	-	Glyoxalase
ENBDON_00714	1240349.ANGC01000018_gene826	4.98e-142	400.0	COG1853@1|root,COG1853@2|Bacteria,2GPJS@201174|Actinobacteria,4FU41@85025|Nocardiaceae	201174|Actinobacteria	S	Flavin reductase like domain	hsaB	GO:0000166,GO:0003674,GO:0003824,GO:0005488,GO:0006066,GO:0006629,GO:0006694,GO:0006706,GO:0006707,GO:0008150,GO:0008152,GO:0008202,GO:0008203,GO:0008610,GO:0009056,GO:0009058,GO:0016042,GO:0016125,GO:0016127,GO:0016491,GO:0016645,GO:0016646,GO:0036094,GO:0042602,GO:0043167,GO:0043168,GO:0044238,GO:0044281,GO:0044282,GO:0046164,GO:0048037,GO:0050660,GO:0050662,GO:0055114,GO:0071704,GO:0097159,GO:…	-	ko:K16048	ko00984,ko01100,map00984,map01100	-	R09819	RC00236	ko00000,ko00001,ko01000	-	-	-	Flavin_Reduct
ENBDON_00715	1429046.RR21198_1133	4.76e-58	186.0	2APFW@1|root,31EIP@2|Bacteria,2HI0Z@201174|Actinobacteria,4G261@85025|Nocardiaceae	201174|Actinobacteria	-	-	-	-	-	-	-	-	-	-	-	-	-	-	DUF4190
ENBDON_00716	1240349.ANGC01000018_gene828	1.96e-114	333.0	COG3861@1|root,COG3861@2|Bacteria,2II0U@201174|Actinobacteria,4FZPG@85025|Nocardiaceae	201174|Actinobacteria	S	PRC-barrel domain	-	-	-	-	-	-	-	-	-	-	-	-	DUF2382,PRC
ENBDON_00717	1240349.ANGC01000018_gene829	9.73e-162	454.0	COG4689@1|root,COG4689@2|Bacteria,2GJWN@201174|Actinobacteria,4FXHE@85025|Nocardiaceae	201174|Actinobacteria	Q	Acetoacetate decarboxylase (ADC)	-	-	-	-	-	-	-	-	-	-	-	-	ADC
ENBDON_00718	1240349.ANGC01000018_gene830	1.26e-212	587.0	COG0656@1|root,COG0656@2|Bacteria,2GJQ7@201174|Actinobacteria,4G03N@85025|Nocardiaceae	201174|Actinobacteria	S	Aldo/keto reductase family	-	-	1.1.1.346	ko:K06221	-	-	R08878	RC00089	ko00000,ko01000	-	-	-	Aldo_ket_red
ENBDON_00719	1240349.ANGC01000018_gene831	3.61e-316	863.0	COG5361@1|root,COG5361@2|Bacteria,2GRDZ@201174|Actinobacteria,4FZDW@85025|Nocardiaceae	201174|Actinobacteria	S	Protein of unknown function (DUF1254)	-	-	-	-	-	-	-	-	-	-	-	-	DUF1214,DUF1254
ENBDON_00720	1240349.ANGC01000018_gene832	1.43e-229	634.0	COG1960@1|root,COG1960@2|Bacteria,2GKVN@201174|Actinobacteria,4FWKB@85025|Nocardiaceae	201174|Actinobacteria	I	Acyl-CoA dehydrogenase, N-terminal domain	fadE33	-	-	-	-	-	-	-	-	-	-	-	Acyl-CoA_dh_1,Acyl-CoA_dh_N
ENBDON_00721	1240349.ANGC01000018_gene833	3.73e-200	558.0	COG1960@1|root,COG1960@2|Bacteria,2GKUW@201174|Actinobacteria,4FY08@85025|Nocardiaceae	201174|Actinobacteria	I	Acyl-CoA dehydrogenase, N-terminal domain	fadE32	-	-	-	-	-	-	-	-	-	-	-	Acyl-CoA_dh_1,Acyl-CoA_dh_N
ENBDON_00722	1240349.ANGC01000018_gene834	2.32e-281	768.0	COG1960@1|root,COG1960@2|Bacteria,2GJA9@201174|Actinobacteria,4FVUN@85025|Nocardiaceae	201174|Actinobacteria	I	Acyl-CoA dehydrogenase, middle domain	fadE20	-	-	-	-	-	-	-	-	-	-	-	Acyl-CoA_dh_1,Acyl-CoA_dh_M,Acyl-CoA_dh_N
ENBDON_00723	1240349.ANGC01000018_gene835	4.79e-219	603.0	COG1024@1|root,COG1024@2|Bacteria,2GKNU@201174|Actinobacteria,4FUYN@85025|Nocardiaceae	201174|Actinobacteria	I	enoyl-CoA hydratase	-	-	4.2.1.17	ko:K01692	ko00071,ko00280,ko00281,ko00310,ko00360,ko00362,ko00380,ko00410,ko00627,ko00640,ko00650,ko00903,ko00930,ko01100,ko01110,ko01120,ko01130,ko01212,map00071,map00280,map00281,map00310,map00360,map00362,map00380,map00410,map00627,map00640,map00650,map00903,map00930,map01100,map01110,map01120,map01130,map01212	M00032,M00087	R03026,R03045,R04137,R04170,R04204,R04224,R04738,R04740,R04744,R04746,R04749,R05595,R06411,R06412,R06942,R08093	RC00831,RC00834,RC01086,RC01095,RC01098,RC01103,RC01217,RC02115	ko00000,ko00001,ko00002,ko01000	-	-	-	ECH_1
ENBDON_00724	1240349.ANGC01000018_gene836	0.0	963.0	COG0318@1|root,COG0318@2|Bacteria,2GIUC@201174|Actinobacteria,4FVBU@85025|Nocardiaceae	201174|Actinobacteria	IQ	AMP-binding enzyme C-terminal domain	fadD3	GO:0003674,GO:0005488,GO:0005515,GO:0005575,GO:0005622,GO:0005623,GO:0005737,GO:0005777,GO:0042579,GO:0043226,GO:0043227,GO:0043229,GO:0043231,GO:0044424,GO:0044444,GO:0044464,GO:0051087	6.2.1.41	ko:K18687	ko00984,ko01100,ko01120,map00984,map01100,map01120	-	R10769	RC00004,RC00014	ko00000,ko00001,ko01000	-	-	-	AMP-binding,AMP-binding_C
ENBDON_00725	1240349.ANGC01000018_gene837	5.5e-297	809.0	COG1960@1|root,COG1960@2|Bacteria,2GM1Q@201174|Actinobacteria,4FUKM@85025|Nocardiaceae	201174|Actinobacteria	I	Acyl-CoA dehydrogenase, middle domain	fadE30	-	1.3.8.7	ko:K00249	ko00071,ko00280,ko00410,ko00640,ko01100,ko01110,ko01130,ko01200,ko01212,ko03320,map00071,map00280,map00410,map00640,map01100,map01110,map01130,map01200,map01212,map03320	M00013,M00036,M00087	R00924,R01175,R01279,R02661,R03172,R03777,R03857,R03990,R04095,R04432,R04751,R04754	RC00052,RC00068,RC00076,RC00095,RC00148,RC00246	ko00000,ko00001,ko00002,ko01000	-	-	-	Acyl-CoA_dh_1,Acyl-CoA_dh_M,Acyl-CoA_dh_N
ENBDON_00726	1240349.ANGC01000018_gene838	1.04e-178	499.0	COG1028@1|root,COG1028@2|Bacteria,2GN3D@201174|Actinobacteria,4FU8H@85025|Nocardiaceae	201174|Actinobacteria	IQ	KR domain	-	GO:0003674,GO:0003824,GO:0004303,GO:0005488,GO:0005515,GO:0005575,GO:0005622,GO:0005623,GO:0005737,GO:0005777,GO:0006066,GO:0006629,GO:0007568,GO:0008150,GO:0008152,GO:0008202,GO:0008203,GO:0009719,GO:0009725,GO:0009987,GO:0010033,GO:0014070,GO:0016125,GO:0016229,GO:0016491,GO:0016614,GO:0016616,GO:0016829,GO:0016835,GO:0016836,GO:0018812,GO:0030283,GO:0032502,GO:0033764,GO:0033993,GO:0042221,GO:…	1.1.1.100	ko:K00059	ko00061,ko00333,ko00780,ko01040,ko01100,ko01130,ko01212,map00061,map00333,map00780,map01040,map01100,map01130,map01212	M00083,M00572	R04533,R04534,R04536,R04543,R04566,R04953,R04964,R07759,R07763,R10116,R10120,R11671	RC00029,RC00117	ko00000,ko00001,ko00002,ko01000,ko01004	-	-	-	adh_short_C2
ENBDON_00727	1240349.ANGC01000018_gene839	3.2e-138	391.0	COG1309@1|root,COG1309@2|Bacteria,2HK4X@201174|Actinobacteria,4FX3H@85025|Nocardiaceae	201174|Actinobacteria	K	Bacterial regulatory proteins, tetR family	kstR2	GO:0003674,GO:0003676,GO:0003677,GO:0003700,GO:0005488,GO:0005515,GO:0006355,GO:0008150,GO:0009889,GO:0010468,GO:0010556,GO:0010565,GO:0019216,GO:0019217,GO:0019219,GO:0019222,GO:0031323,GO:0031326,GO:0042802,GO:0042803,GO:0046983,GO:0050789,GO:0050794,GO:0051171,GO:0051252,GO:0060255,GO:0062012,GO:0065007,GO:0080090,GO:0097159,GO:0140110,GO:1901363,GO:1903506,GO:2000112,GO:2001141	-	ko:K22108	-	-	-	-	ko00000,ko03000	-	-	-	TetR_C_4,TetR_N
ENBDON_00728	1429046.RR21198_1121	1.67e-272	746.0	COG0183@1|root,COG0183@2|Bacteria,2GJAC@201174|Actinobacteria,4FWJQ@85025|Nocardiaceae	201174|Actinobacteria	I	Belongs to the thiolase family	fadA6	GO:0003674,GO:0003676,GO:0003723,GO:0003729,GO:0003824,GO:0003988,GO:0005488,GO:0005575,GO:0005622,GO:0005623,GO:0005737,GO:0005739,GO:0005740,GO:0005758,GO:0005777,GO:0005782,GO:0006082,GO:0006629,GO:0006631,GO:0006635,GO:0008150,GO:0008152,GO:0009056,GO:0009062,GO:0009987,GO:0016042,GO:0016054,GO:0016408,GO:0016740,GO:0016746,GO:0016747,GO:0019395,GO:0019752,GO:0030258,GO:0031907,GO:0031967,GO:…	2.3.1.9	ko:K00626	ko00071,ko00072,ko00280,ko00310,ko00362,ko00380,ko00620,ko00630,ko00640,ko00650,ko00720,ko00900,ko01100,ko01110,ko01120,ko01130,ko01200,ko01212,ko02020,map00071,map00072,map00280,map00310,map00362,map00380,map00620,map00630,map00640,map00650,map00720,map00900,map01100,map01110,map01120,map01130,map01200,map01212,map02020	M00088,M00095,M00373,M00374,M00375	R00238,R01177	RC00004,RC00326	ko00000,ko00001,ko00002,ko01000,ko04147	-	-	-	Thiolase_C,Thiolase_N
ENBDON_00729	1429046.RR21198_1120	9.19e-81	240.0	2C4GP@1|root,300Z8@2|Bacteria,2HITW@201174|Actinobacteria,4G4RN@85025|Nocardiaceae	201174|Actinobacteria	-	-	-	-	-	-	-	-	-	-	-	-	-	-	-
ENBDON_00730	1240349.ANGC01000018_gene842	0.0	912.0	COG2124@1|root,COG2124@2|Bacteria,2GK4Z@201174|Actinobacteria,4FTW2@85025|Nocardiaceae	201174|Actinobacteria	Q	cytochrome P450	-	-	1.14.14.1	ko:K00493	ko00071,ko00380,ko00627,ko01120,map00071,map00380,map00627,map01120	-	R03629,R04121,R05259	RC00046,RC01311	ko00000,ko00001,ko01000	-	-	-	p450
ENBDON_00731	1240349.ANGC01000018_gene843	3.46e-130	370.0	COG1309@1|root,COG1309@2|Bacteria,2GNIP@201174|Actinobacteria,4G06D@85025|Nocardiaceae	201174|Actinobacteria	K	Bacterial regulatory proteins, tetR family	-	-	-	-	-	-	-	-	-	-	-	-	TetR_N
ENBDON_00732	1429046.RR21198_1117	6.44e-57	177.0	COG5552@1|root,COG5552@2|Bacteria,2IQKN@201174|Actinobacteria,4G38P@85025|Nocardiaceae	201174|Actinobacteria	S	Uncharacterized conserved protein (DUF2277)	-	-	-	-	-	-	-	-	-	-	-	-	DUF2277
ENBDON_00733	1240349.ANGC01000018_gene847	6.09e-240	662.0	COG2070@1|root,COG2070@2|Bacteria,2GKA6@201174|Actinobacteria,4FVGZ@85025|Nocardiaceae	201174|Actinobacteria	S	IMP dehydrogenase / GMP reductase domain	fabK	GO:0000166,GO:0001775,GO:0002252,GO:0002263,GO:0002274,GO:0002275,GO:0002283,GO:0002366,GO:0002376,GO:0002443,GO:0002444,GO:0002446,GO:0003674,GO:0003824,GO:0003938,GO:0005488,GO:0005575,GO:0005576,GO:0005622,GO:0005623,GO:0005634,GO:0005737,GO:0005829,GO:0006139,GO:0006163,GO:0006164,GO:0006183,GO:0006725,GO:0006753,GO:0006793,GO:0006796,GO:0006807,GO:0006810,GO:0006887,GO:0006955,GO:0007623,GO:…	1.13.12.16	ko:K00459	ko00910,map00910	-	R00025	RC02541,RC02759	ko00000,ko00001,ko01000	-	-	-	NMO
ENBDON_00734	1240349.ANGC01000018_gene848	1.75e-182	508.0	COG2057@1|root,COG2057@2|Bacteria,2GMA1@201174|Actinobacteria,4FX7A@85025|Nocardiaceae	201174|Actinobacteria	I	Acyl CoA acetate 3-ketoacid CoA transferase beta subunit	catJ	GO:0008150,GO:0040007,GO:0044110,GO:0044116,GO:0044117,GO:0044403,GO:0044419,GO:0051704	-	-	-	-	-	-	-	-	-	-	CoA_trans
ENBDON_00735	1240349.ANGC01000018_gene849	4.92e-203	562.0	COG1788@1|root,COG1788@2|Bacteria,2GK61@201174|Actinobacteria,4FVSX@85025|Nocardiaceae	201174|Actinobacteria	I	Coenzyme A transferase	-	GO:0008150,GO:0040007,GO:0044110,GO:0044116,GO:0044117,GO:0044403,GO:0044419,GO:0051704	2.8.3.12	ko:K01039	ko00643,ko00650,ko01120,map00643,map00650,map01120	-	R04000,R05509	RC00012,RC00131,RC00137	ko00000,ko00001,ko01000	-	-	-	CoA_trans
ENBDON_00736	1240349.ANGC01000018_gene850	7.41e-177	493.0	COG1024@1|root,COG1024@2|Bacteria,2GN54@201174|Actinobacteria,4FW73@85025|Nocardiaceae	201174|Actinobacteria	I	enoyl-CoA hydratase	echA20	-	4.2.1.17	ko:K01692	ko00071,ko00280,ko00281,ko00310,ko00360,ko00362,ko00380,ko00410,ko00627,ko00640,ko00650,ko00903,ko00930,ko01100,ko01110,ko01120,ko01130,ko01212,map00071,map00280,map00281,map00310,map00360,map00362,map00380,map00410,map00627,map00640,map00650,map00903,map00930,map01100,map01110,map01120,map01130,map01212	M00032,M00087	R03026,R03045,R04137,R04170,R04204,R04224,R04738,R04740,R04744,R04746,R04749,R05595,R06411,R06412,R06942,R08093	RC00831,RC00834,RC01086,RC01095,RC01098,RC01103,RC01217,RC02115	ko00000,ko00001,ko00002,ko01000	-	-	-	ECH_1
ENBDON_00737	1240349.ANGC01000018_gene851	1.81e-198	552.0	COG1028@1|root,COG1028@2|Bacteria,2GJ1F@201174|Actinobacteria,4FV5H@85025|Nocardiaceae	201174|Actinobacteria	IQ	Belongs to the short-chain dehydrogenases reductases (SDR) family	-	GO:0003674,GO:0003824,GO:0004303,GO:0005488,GO:0005515,GO:0005575,GO:0005622,GO:0005623,GO:0005737,GO:0005777,GO:0006066,GO:0006629,GO:0007568,GO:0008150,GO:0008152,GO:0008202,GO:0008203,GO:0009719,GO:0009725,GO:0009987,GO:0010033,GO:0014070,GO:0016125,GO:0016229,GO:0016491,GO:0016614,GO:0016616,GO:0016829,GO:0016835,GO:0016836,GO:0018812,GO:0030283,GO:0032502,GO:0033764,GO:0033993,GO:0042221,GO:…	-	-	-	-	-	-	-	-	-	-	adh_short
ENBDON_00738	1240349.ANGC01000018_gene852	2.13e-150	423.0	COG0188@1|root,COG0188@2|Bacteria,2GP6T@201174|Actinobacteria,4FW9K@85025|Nocardiaceae	201174|Actinobacteria	L	Type IIA topoisomerase (DNA gyrase topo II, topoisomerase IV), A subunit	-	-	-	-	-	-	-	-	-	-	-	-	Acetyltransf_1,Acetyltransf_3,DNA_topoisoIV
ENBDON_00739	1240349.ANGC01000018_gene853	1.02e-113	325.0	COG0748@1|root,COG0748@2|Bacteria,2IIRE@201174|Actinobacteria,4G0XD@85025|Nocardiaceae	201174|Actinobacteria	P	F420H(2)-dependent quinone reductase	-	-	-	-	-	-	-	-	-	-	-	-	F420H2_quin_red
ENBDON_00740	1240349.ANGC01000018_gene854	2.47e-272	746.0	COG0183@1|root,COG0183@2|Bacteria,2GJAC@201174|Actinobacteria,4FUI6@85025|Nocardiaceae	201174|Actinobacteria	I	Belongs to the thiolase family	-	-	2.3.1.16,2.3.1.9	ko:K00626,ko:K00632	ko00071,ko00072,ko00280,ko00281,ko00310,ko00362,ko00380,ko00592,ko00620,ko00630,ko00640,ko00642,ko00650,ko00720,ko00900,ko01100,ko01110,ko01120,ko01130,ko01200,ko01212,ko02020,map00071,map00072,map00280,map00281,map00310,map00362,map00380,map00592,map00620,map00630,map00640,map00642,map00650,map00720,map00900,map01100,map01110,map01120,map01130,map01200,map01212,map02020	M00087,M00088,M00095,M00113,M00373,M00374,M00375	R00238,R00829,R00927,R01177,R03778,R03858,R03991,R04546,R04742,R04747,R05506,R05586,R07891,R07895,R07899,R08091,R08095	RC00004,RC00326,RC00405,RC01702,RC02728,RC02898,RC02955	ko00000,ko00001,ko00002,ko01000,ko04147	-	-	-	Thiolase_C,Thiolase_N
ENBDON_00741	1240349.ANGC01000018_gene855	1.42e-309	842.0	COG2124@1|root,COG2124@2|Bacteria,2GKCG@201174|Actinobacteria,4FUMC@85025|Nocardiaceae	201174|Actinobacteria	Q	Cytochrome P450	cyp125	-	1.14.13.141	ko:K15981	ko00984,ko01120,map00984,map01120	-	R09859,R11357	RC01216,RC03368	ko00000,ko00001,ko00199,ko01000	-	-	-	p450
ENBDON_00742	1429046.RR21198_1103	0.0	1019.0	COG1053@1|root,COG1053@2|Bacteria,2GM5I@201174|Actinobacteria,4FW5I@85025|Nocardiaceae	201174|Actinobacteria	C	FAD binding domain	ksdD	-	-	-	-	-	-	-	-	-	-	-	FAD_binding_2
ENBDON_00743	1429046.RR21198_1102	6.96e-293	805.0	COG0477@1|root,COG0477@2|Bacteria,2IC0H@201174|Actinobacteria,4FY03@85025|Nocardiaceae	201174|Actinobacteria	EGP	Sugar (and other) transporter	-	-	-	-	-	-	-	-	-	-	-	-	MFS_1,Sugar_tr
ENBDON_00744	1240349.ANGC01000018_gene858	4.16e-129	368.0	COG2068@1|root,COG2068@2|Bacteria,2GK5R@201174|Actinobacteria,4FXYC@85025|Nocardiaceae	201174|Actinobacteria	S	MobA-like NTP transferase domain	nboR	-	1.1.1.328,2.7.7.76	ko:K07141,ko:K19190	ko00760,ko00790,ko01120,map00760,map00790,map01120	-	R10131,R10132,R11582	RC03053	ko00000,ko00001,ko01000	-	-	-	NTP_transf_3
ENBDON_00745	1240349.ANGC01000018_gene859	7.7e-95	276.0	COG3631@1|root,COG3631@2|Bacteria,2IMJ5@201174|Actinobacteria,4G99R@85025|Nocardiaceae	201174|Actinobacteria	S	SnoaL-like domain	-	-	-	-	-	-	-	-	-	-	-	-	SnoaL_2
ENBDON_00746	1240349.ANGC01000018_gene860	5.78e-212	585.0	COG2141@1|root,COG2141@2|Bacteria,2H0K9@201174|Actinobacteria,4FU0S@85025|Nocardiaceae	201174|Actinobacteria	C	Luciferase-like monooxygenase	-	-	-	-	-	-	-	-	-	-	-	-	Bac_luciferase
ENBDON_00747	1240349.ANGC01000018_gene861	2.52e-283	774.0	COG0183@1|root,COG0183@2|Bacteria,2GJ0W@201174|Actinobacteria,4FUTT@85025|Nocardiaceae	201174|Actinobacteria	I	Catalyzes the synthesis of acetoacetyl coenzyme A from two molecules of acetyl coenzyme A. It can also act as a thiolase, catalyzing the reverse reaction and generating two-carbon units from the four-carbon product of fatty acid oxidation	ltp3	-	2.3.1.9	ko:K00626	ko00071,ko00072,ko00280,ko00310,ko00362,ko00380,ko00620,ko00630,ko00640,ko00650,ko00720,ko00900,ko01100,ko01110,ko01120,ko01130,ko01200,ko01212,ko02020,map00071,map00072,map00280,map00310,map00362,map00380,map00620,map00630,map00640,map00650,map00720,map00900,map01100,map01110,map01120,map01130,map01200,map01212,map02020	M00088,M00095,M00373,M00374,M00375	R00238,R01177	RC00004,RC00326	ko00000,ko00001,ko00002,ko01000,ko04147	-	-	-	-
ENBDON_00748	1240349.ANGC01000018_gene862	1.66e-246	677.0	COG0183@1|root,COG0183@2|Bacteria,2GNCM@201174|Actinobacteria,4FXEG@85025|Nocardiaceae	201174|Actinobacteria	I	lipid-transfer protein	ltp4	-	-	-	-	-	-	-	-	-	-	-	Thiolase_C
ENBDON_00749	1240349.ANGC01000018_gene863	4.53e-239	656.0	COG1545@1|root,COG1545@2|Bacteria,2GJHW@201174|Actinobacteria,4FXFT@85025|Nocardiaceae	201174|Actinobacteria	S	DUF35 OB-fold domain, acyl-CoA-associated	-	-	-	ko:K07068	-	-	-	-	ko00000	-	-	-	DUF35_N,OB_aCoA_assoc
ENBDON_00750	1240349.ANGC01000018_gene864	1.89e-232	641.0	COG2141@1|root,COG2141@2|Bacteria,2GIY3@201174|Actinobacteria,4FWNJ@85025|Nocardiaceae	201174|Actinobacteria	C	Luciferase-like monooxygenase	-	-	-	-	-	-	-	-	-	-	-	-	Bac_luciferase
ENBDON_00751	1429046.RR21198_1093	2.85e-186	519.0	COG1024@1|root,COG1024@2|Bacteria,2GKJ6@201174|Actinobacteria,4FUTM@85025|Nocardiaceae	201174|Actinobacteria	I	enoyl-CoA hydratase	echA19	GO:0003674,GO:0003824,GO:0004300,GO:0005575,GO:0005622,GO:0005623,GO:0005737,GO:0005739,GO:0006082,GO:0006629,GO:0006631,GO:0006635,GO:0008150,GO:0008152,GO:0009056,GO:0009062,GO:0009987,GO:0016042,GO:0016054,GO:0016829,GO:0016835,GO:0016836,GO:0019395,GO:0019752,GO:0030258,GO:0032787,GO:0034440,GO:0043226,GO:0043227,GO:0043229,GO:0043231,GO:0043436,GO:0044237,GO:0044238,GO:0044242,GO:0044248,GO:…	4.2.1.17	ko:K01692	ko00071,ko00280,ko00281,ko00310,ko00360,ko00362,ko00380,ko00410,ko00627,ko00640,ko00650,ko00903,ko00930,ko01100,ko01110,ko01120,ko01130,ko01212,map00071,map00280,map00281,map00310,map00360,map00362,map00380,map00410,map00627,map00640,map00650,map00903,map00930,map01100,map01110,map01120,map01130,map01212	M00032,M00087	R03026,R03045,R04137,R04170,R04204,R04224,R04738,R04740,R04744,R04746,R04749,R05595,R06411,R06412,R06942,R08093	RC00831,RC00834,RC01086,RC01095,RC01098,RC01103,RC01217,RC02115	ko00000,ko00001,ko00002,ko01000	-	-	-	ECH_1
ENBDON_00752	1240349.ANGC01000018_gene866	0.0	1087.0	COG0318@1|root,COG0318@2|Bacteria,2GJA2@201174|Actinobacteria,4FU40@85025|Nocardiaceae	201174|Actinobacteria	IQ	AMP-binding enzyme	fadD19	GO:0001676,GO:0003674,GO:0003824,GO:0004467,GO:0005488,GO:0005515,GO:0005575,GO:0005618,GO:0005622,GO:0005623,GO:0005737,GO:0005777,GO:0006082,GO:0006629,GO:0006631,GO:0008150,GO:0008152,GO:0008610,GO:0009058,GO:0009273,GO:0009605,GO:0009607,GO:0009987,GO:0015645,GO:0016405,GO:0016874,GO:0016877,GO:0016878,GO:0019752,GO:0030312,GO:0032787,GO:0042546,GO:0042579,GO:0043207,GO:0043226,GO:0043227,GO:…	6.2.1.42	ko:K18688	-	-	-	-	ko00000,ko01000	-	-	-	AMP-binding,AMP-binding_C
ENBDON_00753	1240349.ANGC01000018_gene867	1.85e-263	722.0	COG2070@1|root,COG2070@2|Bacteria,2GKGT@201174|Actinobacteria,4FW5B@85025|Nocardiaceae	201174|Actinobacteria	S	Nitronate monooxygenase	-	-	1.13.12.16	ko:K00459	ko00910,map00910	-	R00025	RC02541,RC02759	ko00000,ko00001,ko01000	-	-	-	NMO
ENBDON_00754	1240349.ANGC01000018_gene868	1.28e-277	760.0	COG2124@1|root,COG2124@2|Bacteria,2GJ8V@201174|Actinobacteria,4FUH9@85025|Nocardiaceae	201174|Actinobacteria	Q	Cytochrome P450	cyp130	GO:0003674,GO:0005488,GO:0005575,GO:0005618,GO:0005623,GO:0020037,GO:0030312,GO:0044464,GO:0046906,GO:0048037,GO:0071944,GO:0097159,GO:1901363	-	ko:K21119	-	-	-	-	ko00000,ko00199	-	-	-	p450
ENBDON_00755	1240349.ANGC01000018_gene869	0.0	1540.0	COG2132@1|root,COG2132@2|Bacteria,2GPUP@201174|Actinobacteria,4FYPQ@85025|Nocardiaceae	201174|Actinobacteria	Q	Multicopper oxidase	aniA	-	1.7.2.1	ko:K00368	ko00910,ko01120,map00910,map01120	M00529	R00783,R00785	RC00086	ko00000,ko00001,ko00002,ko01000	-	-	-	Cu-oxidase_2,Cu-oxidase_3,Cupredoxin_1
ENBDON_00756	1240349.ANGC01000018_gene870	4.47e-224	622.0	COG4243@1|root,COG4243@2|Bacteria,2HG56@201174|Actinobacteria	201174|Actinobacteria	Q	Vitamin k epoxide reductase	-	-	1.7.2.1	ko:K00368	ko00910,ko01120,map00910,map01120	M00529	R00783,R00785	RC00086	ko00000,ko00001,ko00002,ko01000	-	-	-	-
ENBDON_00757	1240349.ANGC01000018_gene871	2.53e-130	371.0	COG2345@1|root,COG2345@2|Bacteria,2IAWJ@201174|Actinobacteria,4G00K@85025|Nocardiaceae	201174|Actinobacteria	K	Transcriptional regulator	-	-	-	-	-	-	-	-	-	-	-	-	HTH_20,HTH_IclR,MarR_2
ENBDON_00758	350054.Mflv_3486	6.73e-53	176.0	COG4309@1|root,COG4309@2|Bacteria,2GS7C@201174|Actinobacteria,238P3@1762|Mycobacteriaceae	201174|Actinobacteria	S	Uncharacterized conserved protein (DUF2249)	-	-	-	-	-	-	-	-	-	-	-	-	DUF2249,Hemerythrin
ENBDON_00759	1240349.ANGC01000018_gene872	0.0	1032.0	COG0318@1|root,COG0318@2|Bacteria,2GKZ6@201174|Actinobacteria,4FTYH@85025|Nocardiaceae	201174|Actinobacteria	IQ	synthetase	fadD17	GO:0001676,GO:0003674,GO:0003824,GO:0004467,GO:0005575,GO:0005622,GO:0005623,GO:0005737,GO:0005829,GO:0005886,GO:0006082,GO:0006629,GO:0006631,GO:0006633,GO:0008150,GO:0008152,GO:0008610,GO:0009058,GO:0009273,GO:0009987,GO:0015645,GO:0016020,GO:0016053,GO:0016405,GO:0016874,GO:0016877,GO:0016878,GO:0019752,GO:0032787,GO:0042546,GO:0042759,GO:0043436,GO:0044085,GO:0044237,GO:0044238,GO:0044249,GO:…	-	ko:K00666	-	-	-	-	ko00000,ko01000,ko01004	-	-	-	AMP-binding,AMP-binding_C
ENBDON_00760	1240349.ANGC01000018_gene873	3.11e-251	691.0	COG1960@1|root,COG1960@2|Bacteria,2GITF@201174|Actinobacteria,4FYBI@85025|Nocardiaceae	201174|Actinobacteria	I	Acyl-CoA dehydrogenase, C-terminal domain	fadE27	-	1.3.8.7	ko:K00249	ko00071,ko00280,ko00410,ko00640,ko01100,ko01110,ko01130,ko01200,ko01212,ko03320,map00071,map00280,map00410,map00640,map01100,map01110,map01130,map01200,map01212,map03320	M00013,M00036,M00087	R00924,R01175,R01279,R02661,R03172,R03777,R03857,R03990,R04095,R04432,R04751,R04754	RC00052,RC00068,RC00076,RC00095,RC00148,RC00246	ko00000,ko00001,ko00002,ko01000	-	-	-	Acyl-CoA_dh_1,Acyl-CoA_dh_M,Acyl-CoA_dh_N
ENBDON_00761	1240349.ANGC01000018_gene874	5.98e-287	783.0	COG1960@1|root,COG1960@2|Bacteria,2GIXS@201174|Actinobacteria,4FVNW@85025|Nocardiaceae	201174|Actinobacteria	I	Acyl-CoA dehydrogenase, middle domain	fadE26	-	1.3.8.7	ko:K00249	ko00071,ko00280,ko00410,ko00640,ko01100,ko01110,ko01130,ko01200,ko01212,ko03320,map00071,map00280,map00410,map00640,map01100,map01110,map01130,map01200,map01212,map03320	M00013,M00036,M00087	R00924,R01175,R01279,R02661,R03172,R03777,R03857,R03990,R04095,R04432,R04751,R04754	RC00052,RC00068,RC00076,RC00095,RC00148,RC00246	ko00000,ko00001,ko00002,ko01000	-	-	-	Acyl-CoA_dh_1,Acyl-CoA_dh_M,Acyl-CoA_dh_N
ENBDON_00762	1240349.ANGC01000018_gene875	1.33e-35	120.0	COG1141@1|root,COG1141@2|Bacteria,2GWHY@201174|Actinobacteria,4G3WN@85025|Nocardiaceae	201174|Actinobacteria	C	Divergent 4Fe-4S mono-cluster	-	-	-	ko:K05337	-	-	-	-	ko00000	-	-	-	Fer4_13,Fer4_15
ENBDON_00763	1429046.RR21198_1083	2.79e-191	535.0	COG1028@1|root,COG1028@2|Bacteria,2GN6U@201174|Actinobacteria,4FU26@85025|Nocardiaceae	201174|Actinobacteria	IQ	Belongs to the short-chain dehydrogenases reductases (SDR) family	hsd4A	GO:0003674,GO:0003824,GO:0004303,GO:0005488,GO:0005515,GO:0005575,GO:0005622,GO:0005623,GO:0005737,GO:0005777,GO:0006066,GO:0006629,GO:0007568,GO:0008150,GO:0008152,GO:0008202,GO:0008203,GO:0009719,GO:0009725,GO:0009987,GO:0010033,GO:0014070,GO:0016125,GO:0016229,GO:0016491,GO:0016614,GO:0016616,GO:0016829,GO:0016835,GO:0016836,GO:0018812,GO:0030283,GO:0032502,GO:0033764,GO:0033993,GO:0042221,GO:…	1.1.1.100	ko:K00059	ko00061,ko00333,ko00780,ko01040,ko01100,ko01130,ko01212,map00061,map00333,map00780,map01040,map01100,map01130,map01212	M00083,M00572	R04533,R04534,R04536,R04543,R04566,R04953,R04964,R07759,R07763,R10116,R10120,R11671	RC00029,RC00117	ko00000,ko00001,ko00002,ko01000,ko01004	-	-	-	adh_short,adh_short_C2
ENBDON_00764	1240349.ANGC01000018_gene877	2.53e-164	461.0	COG0767@1|root,COG0767@2|Bacteria,2GXR8@201174|Actinobacteria,4FWSN@85025|Nocardiaceae	201174|Actinobacteria	Q	Permease MlaE	yrbE4A	-	-	ko:K02066	ko02010,map02010	M00210,M00669,M00670	-	-	ko00000,ko00001,ko00002,ko02000	3.A.1.27	-	-	MlaE
ENBDON_00765	1240349.ANGC01000018_gene878	2.69e-161	456.0	COG0767@1|root,COG0767@2|Bacteria,2GJ27@201174|Actinobacteria,4FW2V@85025|Nocardiaceae	201174|Actinobacteria	Q	Permease MlaE	yrbE1B	-	-	ko:K02066	ko02010,map02010	M00210,M00669,M00670	-	-	ko00000,ko00001,ko00002,ko02000	3.A.1.27	-	-	MlaE
ENBDON_00766	1240349.ANGC01000018_gene879	2.15e-280	766.0	COG1463@1|root,COG1463@2|Bacteria,2GNXB@201174|Actinobacteria,4FV0S@85025|Nocardiaceae	201174|Actinobacteria	Q	Cholesterol uptake porter CUP1 of Mce4, putative	mce1A	-	-	ko:K02067	ko02010,map02010	M00210,M00669,M00670	-	-	ko00000,ko00001,ko00002,ko02000	3.A.1.27	-	-	Mce4_CUP1,MlaD
ENBDON_00767	1240349.ANGC01000018_gene880	2.68e-229	633.0	COG1463@1|root,COG1463@2|Bacteria,2GKHV@201174|Actinobacteria,4FXMI@85025|Nocardiaceae	201174|Actinobacteria	Q	MlaD protein	mce4B	-	-	ko:K02067	ko02010,map02010	M00210,M00669,M00670	-	-	ko00000,ko00001,ko00002,ko02000	3.A.1.27	-	-	Mce4_CUP1,MlaD
ENBDON_00768	1240349.ANGC01000018_gene881	4.53e-172	489.0	COG1463@1|root,COG1463@2|Bacteria,2GMU6@201174|Actinobacteria,4FVSZ@85025|Nocardiaceae	201174|Actinobacteria	Q	MlaD protein	mce1C	-	-	ko:K02067	ko02010,map02010	M00210,M00669,M00670	-	-	ko00000,ko00001,ko00002,ko02000	3.A.1.27	-	-	Mce4_CUP1,MlaD
ENBDON_00769	1240349.ANGC01000018_gene882	7.13e-295	807.0	COG1463@1|root,COG1463@2|Bacteria,2GNXN@201174|Actinobacteria,4FUJ7@85025|Nocardiaceae	201174|Actinobacteria	Q	MlaD protein	mce4D	-	-	ko:K02067	ko02010,map02010	M00210,M00669,M00670	-	-	ko00000,ko00001,ko00002,ko02000	3.A.1.27	-	-	Mce4_CUP1,MlaD
ENBDON_00770	1429046.RR21198_1076	6.31e-239	663.0	COG1463@1|root,COG1463@2|Bacteria,2GJVB@201174|Actinobacteria,4FW19@85025|Nocardiaceae	201174|Actinobacteria	Q	MlaD protein	mce1E	-	-	ko:K02067	ko02010,map02010	M00210,M00669,M00670	-	-	ko00000,ko00001,ko00002,ko02000	3.A.1.27	-	-	Mce4_CUP1,MlaD
ENBDON_00771	1240349.ANGC01000018_gene884	0.0	904.0	COG1463@1|root,COG1463@2|Bacteria,2GNEP@201174|Actinobacteria,4FUT5@85025|Nocardiaceae	201174|Actinobacteria	Q	MlaD protein	mce4F	-	-	ko:K02067	ko02010,map02010	M00210,M00669,M00670	-	-	ko00000,ko00001,ko00002,ko02000	3.A.1.27	-	-	Mce4_CUP1,MlaD
ENBDON_00772	1429046.RR21198_1074	3.4e-94	278.0	2E5BU@1|root,3303V@2|Bacteria,2IFCH@201174|Actinobacteria,4G159@85025|Nocardiaceae	201174|Actinobacteria	-	-	-	-	-	ko:K18481	-	M00670	-	-	ko00000,ko00002,ko02000	3.A.1.27.4,3.A.1.27.5	-	-	-
ENBDON_00773	1429046.RR21198_1073	1.01e-101	298.0	COG0484@1|root,COG0484@2|Bacteria,2GQY9@201174|Actinobacteria,4GA0I@85025|Nocardiaceae	201174|Actinobacteria	O	heat shock protein binding	-	-	-	ko:K18481	-	M00670	-	-	ko00000,ko00002,ko02000	3.A.1.27.4,3.A.1.27.5	-	-	-
ENBDON_00774	1240349.ANGC01000018_gene887	6.85e-109	315.0	COG0745@1|root,COG0745@2|Bacteria,2I2VM@201174|Actinobacteria	201174|Actinobacteria	T	Response regulator receiver	-	-	-	ko:K02485	-	-	-	-	ko00000,ko02022	-	-	-	Response_reg
ENBDON_00775	1240349.ANGC01000018_gene888	0.0	974.0	COG0380@1|root,COG0380@2|Bacteria,2GMX7@201174|Actinobacteria,4FXX9@85025|Nocardiaceae	201174|Actinobacteria	G	Glycosyltransferase family 20	otsA	GO:0003674,GO:0003824,GO:0003825,GO:0005488,GO:0005575,GO:0005618,GO:0005622,GO:0005623,GO:0005737,GO:0005829,GO:0005886,GO:0005975,GO:0005984,GO:0005991,GO:0005992,GO:0006793,GO:0006796,GO:0006950,GO:0008150,GO:0008152,GO:0008194,GO:0009058,GO:0009311,GO:0009312,GO:0009987,GO:0016020,GO:0016051,GO:0016311,GO:0016740,GO:0016757,GO:0016758,GO:0016787,GO:0016788,GO:0016791,GO:0030145,GO:0030312,GO:…	2.4.1.15,2.4.1.347,3.1.3.12	ko:K00697,ko:K16055	ko00500,ko01100,map00500,map01100	-	R02737,R02778	RC00005,RC00017,RC00049,RC02748	ko00000,ko00001,ko01000,ko01003	-	GT20	-	Glyco_transf_20,Trehalose_PPase
ENBDON_00776	1240349.ANGC01000018_gene889	8.06e-33	113.0	2FG3C@1|root,347ZY@2|Bacteria,2GRSF@201174|Actinobacteria,4G3W3@85025|Nocardiaceae	201174|Actinobacteria	-	-	-	-	-	-	-	-	-	-	-	-	-	-	-
ENBDON_00777	1240349.ANGC01000018_gene890	0.0	999.0	COG1132@1|root,COG1132@2|Bacteria,2GJAP@201174|Actinobacteria,4FUG2@85025|Nocardiaceae	201174|Actinobacteria	V	ABC transporter transmembrane region	-	-	-	ko:K02021	-	-	-	-	ko00000,ko02000	3.A.1.106,3.A.1.110,3.A.1.112,3.A.1.113,3.A.1.117,3.A.1.21	-	-	ABC_membrane,ABC_tran
ENBDON_00778	1240349.ANGC01000018_gene891	0.0	1006.0	COG1132@1|root,COG1132@2|Bacteria,2GJ8B@201174|Actinobacteria,4FWA5@85025|Nocardiaceae	201174|Actinobacteria	V	ABC transporter transmembrane region	-	-	-	ko:K06148	-	-	-	-	ko00000,ko02000	3.A.1	-	-	ABC_membrane,ABC_tran
ENBDON_00779	1240349.ANGC01000018_gene892	7.46e-190	528.0	COG2021@1|root,COG2021@2|Bacteria,2GMXN@201174|Actinobacteria,4FWS5@85025|Nocardiaceae	201174|Actinobacteria	E	Serine aminopeptidase, S33	-	-	-	ko:K16434	ko01055,map01055	-	-	-	ko00000,ko00001	-	-	-	Abhydrolase_1,Abhydrolase_6
ENBDON_00780	1429046.RR21198_3267	3.4e-123	353.0	COG1309@1|root,COG1309@2|Bacteria,2IPMI@201174|Actinobacteria,4G0XB@85025|Nocardiaceae	201174|Actinobacteria	K	Bacterial regulatory proteins, tetR family	-	-	-	-	-	-	-	-	-	-	-	-	TetR_N
ENBDON_00781	1429046.RR21198_3268	2.68e-273	749.0	COG4638@1|root,COG4638@2|Bacteria,2GKJY@201174|Actinobacteria,4FXKR@85025|Nocardiaceae	201174|Actinobacteria	P	Ring hydroxylating alpha subunit (catalytic domain)	-	-	-	-	-	-	-	-	-	-	-	-	Rieske,Ring_hydroxyl_A
ENBDON_00782	1429046.RR21198_3269	1.26e-130	376.0	COG1024@1|root,COG1024@2|Bacteria,2IKNM@201174|Actinobacteria,4FVWE@85025|Nocardiaceae	201174|Actinobacteria	I	Enoyl-CoA hydratase/isomerase	-	-	-	-	-	-	-	-	-	-	-	-	ECH_1
ENBDON_00783	1429046.RR21198_3270	1.2e-120	348.0	COG2050@1|root,COG2050@2|Bacteria,2HHJ1@201174|Actinobacteria,4G9CE@85025|Nocardiaceae	201174|Actinobacteria	Q	Thioesterase superfamily	-	-	-	-	-	-	-	-	-	-	-	-	4HBT
ENBDON_00784	1429046.RR21198_3271	4.78e-272	747.0	COG1804@1|root,COG1804@2|Bacteria,2I8ZJ@201174|Actinobacteria,4FXK0@85025|Nocardiaceae	201174|Actinobacteria	C	CoA-transferase family III	-	-	-	-	-	-	-	-	-	-	-	-	CoA_transf_3
ENBDON_00785	1429046.RR21198_3272	0.0	967.0	COG0318@1|root,COG0318@2|Bacteria,2GIUC@201174|Actinobacteria,4FUDU@85025|Nocardiaceae	201174|Actinobacteria	IQ	AMP-binding enzyme C-terminal domain	-	-	-	ko:K00666	-	-	-	-	ko00000,ko01000,ko01004	-	-	-	AMP-binding,AMP-binding_C
ENBDON_00786	1429046.RR21198_3273	1.5e-275	760.0	COG2271@1|root,COG2271@2|Bacteria,2I36S@201174|Actinobacteria,4FZYI@85025|Nocardiaceae	201174|Actinobacteria	G	Sugar (and other) transporter	-	-	-	ko:K08195	-	-	-	-	ko00000,ko02000	2.A.1.15	-	-	MFS_1,MFS_4
ENBDON_00787	1429046.RR21198_3274	0.0	1302.0	COG0243@1|root,COG0243@2|Bacteria,2I8HX@201174|Actinobacteria,4FZAV@85025|Nocardiaceae	201174|Actinobacteria	C	Belongs to the prokaryotic molybdopterin-containing oxidoreductase family	-	-	-	-	-	-	-	-	-	-	-	-	Molybdop_Fe4S4,Molybdopterin,Molydop_binding
ENBDON_00788	1429046.RR21198_3275	0.0	1407.0	COG0243@1|root,COG0243@2|Bacteria,2GNYQ@201174|Actinobacteria,4FVPP@85025|Nocardiaceae	201174|Actinobacteria	C	Belongs to the prokaryotic molybdopterin-containing oxidoreductase family	-	-	1.17.1.9	ko:K00122	ko00630,ko00680,ko01100,ko01120,ko01200,map00630,map00680,map01100,map01120,map01200	-	R00519	RC02796	ko00000,ko00001,ko01000	-	-	-	Molybdop_Fe4S4,Molybdopterin,Molydop_binding
ENBDON_00789	1429046.RR21198_3276	1.58e-243	675.0	COG1250@1|root,COG1250@2|Bacteria,2GJ50@201174|Actinobacteria,4G5K0@85025|Nocardiaceae	201174|Actinobacteria	I	3-hydroxyacyl-CoA dehydrogenase, C-terminal domain	-	-	1.1.1.35,4.2.1.17,5.1.2.3	ko:K01782	ko00071,ko00280,ko00281,ko00310,ko00362,ko00380,ko00410,ko00640,ko00650,ko00903,ko00930,ko01040,ko01100,ko01110,ko01120,ko01130,ko01200,ko01212,map00071,map00280,map00281,map00310,map00362,map00380,map00410,map00640,map00650,map00903,map00930,map01040,map01100,map01110,map01120,map01130,map01200,map01212	M00032,M00087	R01975,R03026,R03045,R03276,R04137,R04170,R04203,R04204,R04224,R04737,R04738,R04739,R04740,R04741,R04744,R04745,R04746,R04748,R04749,R05066,R05305,R06411,R06412,R06941,R06942,R07935,R07951,R08093,R08094	RC00029,RC00099,RC00117,RC00241,RC00525,RC00831,RC00834,RC00896,RC01086,RC01095,RC01098,RC01103,RC01217,RC02115	ko00000,ko00001,ko00002,ko01000	-	-	-	3HCDH,3HCDH_N,ECH_1
ENBDON_00790	1429046.RR21198_3277	0.0	962.0	COG0493@1|root,COG1146@1|root,COG0493@2|Bacteria,COG1146@2|Bacteria,2GJ4A@201174|Actinobacteria,4FVYB@85025|Nocardiaceae	201174|Actinobacteria	C	ferredoxin--NADP( ) reductase	-	-	1.18.1.2,1.19.1.1	ko:K00528	-	-	R10159	-	ko00000,ko01000	-	-	-	Fer4,Pyr_redox_2
ENBDON_00791	1429046.RR21198_3278	0.0	990.0	COG0318@1|root,COG0318@2|Bacteria,2GIUC@201174|Actinobacteria,4FZXY@85025|Nocardiaceae	201174|Actinobacteria	IQ	COG0318 Acyl-CoA synthetases (AMP-forming) AMP-acid ligases II	-	-	-	-	-	-	-	-	-	-	-	-	AMP-binding,AMP-binding_C
ENBDON_00792	1429046.RR21198_3279	5.93e-157	442.0	COG1028@1|root,COG1028@2|Bacteria,2I43C@201174|Actinobacteria,4FZ57@85025|Nocardiaceae	201174|Actinobacteria	IQ	Belongs to the short-chain dehydrogenases reductases (SDR) family	-	-	1.1.1.100	ko:K00059	ko00061,ko00333,ko00780,ko01040,ko01100,ko01130,ko01212,map00061,map00333,map00780,map01040,map01100,map01130,map01212	M00083,M00572	R04533,R04534,R04536,R04543,R04566,R04953,R04964,R07759,R07763,R10116,R10120,R11671	RC00029,RC00117	ko00000,ko00001,ko00002,ko01000,ko01004	-	-	-	adh_short
ENBDON_00793	101510.RHA1_ro00403	9.35e-283	778.0	COG0477@1|root,COG0477@2|Bacteria,2IEG9@201174|Actinobacteria,4FXV8@85025|Nocardiaceae	201174|Actinobacteria	EGP	Sugar (and other) transporter	-	-	-	-	-	-	-	-	-	-	-	-	MFS_1,Sugar_tr
ENBDON_00794	1429046.RR21198_3281	0.0	1313.0	COG0243@1|root,COG0243@2|Bacteria,2GN8U@201174|Actinobacteria,4FZAB@85025|Nocardiaceae	201174|Actinobacteria	C	Belongs to the prokaryotic molybdopterin-containing oxidoreductase family	-	-	-	-	-	-	-	-	-	-	-	-	Molybdop_Fe4S4,Molybdopterin,Molydop_binding
ENBDON_00795	1429046.RR21198_3282	5.52e-177	496.0	COG1028@1|root,COG1028@2|Bacteria,2GNIN@201174|Actinobacteria,4FY4S@85025|Nocardiaceae	201174|Actinobacteria	IQ	Enoyl-(Acyl carrier protein) reductase	-	-	-	-	-	-	-	-	-	-	-	-	adh_short_C2
ENBDON_00796	1429046.RR21198_3283	1.03e-176	494.0	COG1024@1|root,COG1024@2|Bacteria,2GJ7Z@201174|Actinobacteria,4FWDA@85025|Nocardiaceae	201174|Actinobacteria	I	Belongs to the enoyl-CoA hydratase isomerase family	-	-	4.2.1.17	ko:K01692	ko00071,ko00280,ko00281,ko00310,ko00360,ko00362,ko00380,ko00410,ko00627,ko00640,ko00650,ko00903,ko00930,ko01100,ko01110,ko01120,ko01130,ko01212,map00071,map00280,map00281,map00310,map00360,map00362,map00380,map00410,map00627,map00640,map00650,map00903,map00930,map01100,map01110,map01120,map01130,map01212	M00032,M00087	R03026,R03045,R04137,R04170,R04204,R04224,R04738,R04740,R04744,R04746,R04749,R05595,R06411,R06412,R06942,R08093	RC00831,RC00834,RC01086,RC01095,RC01098,RC01103,RC01217,RC02115	ko00000,ko00001,ko00002,ko01000	-	-	-	ECH_1
ENBDON_00797	1429046.RR21198_3284	7.95e-250	685.0	COG2141@1|root,COG2141@2|Bacteria,2GIY3@201174|Actinobacteria,4FYD8@85025|Nocardiaceae	201174|Actinobacteria	C	Luciferase-like monooxygenase	-	-	-	-	-	-	-	-	-	-	-	-	Bac_luciferase
ENBDON_00798	1429046.RR21198_3285	0.0	937.0	COG0183@1|root,COG0183@2|Bacteria,2I3PP@201174|Actinobacteria,4G9JQ@85025|Nocardiaceae	201174|Actinobacteria	I	Acetyl-CoA acetyltransferase	-	-	2.3.1.9	ko:K00626	ko00071,ko00072,ko00280,ko00310,ko00362,ko00380,ko00620,ko00630,ko00640,ko00650,ko00720,ko00900,ko01100,ko01110,ko01120,ko01130,ko01200,ko01212,ko02020,map00071,map00072,map00280,map00310,map00362,map00380,map00620,map00630,map00640,map00650,map00720,map00900,map01100,map01110,map01120,map01130,map01200,map01212,map02020	M00088,M00095,M00373,M00374,M00375	R00238,R01177	RC00004,RC00326	ko00000,ko00001,ko00002,ko01000,ko04147	-	-	-	-
ENBDON_00799	1429046.RR21198_3286	2.44e-69	209.0	2FCCW@1|root,344GH@2|Bacteria,2GT56@201174|Actinobacteria,4G248@85025|Nocardiaceae	201174|Actinobacteria	-	-	-	-	-	-	-	-	-	-	-	-	-	-	-
ENBDON_00800	1429046.RR21198_3287	3.45e-109	313.0	COG1545@1|root,COG1545@2|Bacteria,2H1GW@201174|Actinobacteria,4G17Y@85025|Nocardiaceae	201174|Actinobacteria	S	Rubredoxin-like zinc ribbon domain (DUF35_N)	-	-	-	ko:K07068	-	-	-	-	ko00000	-	-	-	DUF35_N,OB_aCoA_assoc
ENBDON_00801	1429046.RR21198_3288	5.62e-274	751.0	COG0183@1|root,COG0183@2|Bacteria,2I8JE@201174|Actinobacteria,4FWS0@85025|Nocardiaceae	201174|Actinobacteria	I	Belongs to the thiolase family	-	-	-	-	-	-	-	-	-	-	-	-	-
ENBDON_00802	1429046.RR21198_3289	1.54e-315	863.0	COG1012@1|root,COG1012@2|Bacteria,2GIWZ@201174|Actinobacteria,4FTXB@85025|Nocardiaceae	201174|Actinobacteria	C	Belongs to the aldehyde dehydrogenase family	-	-	1.2.1.3	ko:K00128	ko00010,ko00053,ko00071,ko00280,ko00310,ko00330,ko00340,ko00380,ko00410,ko00561,ko00620,ko00625,ko00903,ko00981,ko01100,ko01110,ko01120,ko01130,map00010,map00053,map00071,map00280,map00310,map00330,map00340,map00380,map00410,map00561,map00620,map00625,map00903,map00981,map01100,map01110,map01120,map01130	M00135	R00264,R00631,R00710,R00904,R01752,R01986,R02549,R02678,R02940,R02957,R03283,R03869,R04065,R04506,R04903,R05050,R05237,R05238,R05286,R06366,R08146	RC00047,RC00071,RC00080,RC00186,RC00218,RC00242,RC00816,RC01500	ko00000,ko00001,ko00002,ko01000	-	-	-	Aldedh
ENBDON_00803	1429046.RR21198_3290	0.0	1419.0	COG1804@1|root,COG1804@2|Bacteria,2GMIW@201174|Actinobacteria,4FW1X@85025|Nocardiaceae	201174|Actinobacteria	C	CoA-transferase family III	-	-	-	-	-	-	-	-	-	-	-	-	CoA_transf_3
ENBDON_00804	1429046.RR21198_3291	2.74e-284	778.0	COG2124@1|root,COG2124@2|Bacteria,2HMMY@201174|Actinobacteria,4G8KI@85025|Nocardiaceae	201174|Actinobacteria	C	Cytochrome P450	-	-	-	-	-	-	-	-	-	-	-	-	p450
ENBDON_00805	1429046.RR21198_3292	1.43e-100	292.0	COG0662@1|root,COG0662@2|Bacteria	2|Bacteria	G	Cupin 2, conserved barrel domain protein	-	-	-	-	-	-	-	-	-	-	-	-	Cupin_2
ENBDON_00806	1429046.RR21198_3293	5.48e-302	822.0	COG2141@1|root,COG2141@2|Bacteria,2GITK@201174|Actinobacteria,4G8J2@85025|Nocardiaceae	201174|Actinobacteria	C	Luciferase-like monooxygenase	limB	-	1.14.13.107	ko:K14733	ko00903,map00903	-	R06398,R09385,R09389,R09393	RC01506	ko00000,ko00001,ko01000	-	-	-	Bac_luciferase
ENBDON_00807	1429046.RR21198_3294	8.33e-187	520.0	COG1028@1|root,COG1028@2|Bacteria,2GJ9X@201174|Actinobacteria,4G5UZ@85025|Nocardiaceae	201174|Actinobacteria	C	KR domain	-	-	-	-	-	-	-	-	-	-	-	-	adh_short,adh_short_C2
ENBDON_00808	1429046.RR21198_3295	3.8e-106	306.0	COG1545@1|root,COG1545@2|Bacteria,2H1GW@201174|Actinobacteria,4G65U@85025|Nocardiaceae	201174|Actinobacteria	S	Rubredoxin-like zinc ribbon domain (DUF35_N)	-	-	-	-	-	-	-	-	-	-	-	-	DUF35_N,OB_aCoA_assoc
ENBDON_00809	1429046.RR21198_3296	9.07e-261	717.0	COG0183@1|root,COG0183@2|Bacteria,2I8JE@201174|Actinobacteria,4G5EP@85025|Nocardiaceae	201174|Actinobacteria	I	Belongs to the thiolase family	-	-	-	-	-	-	-	-	-	-	-	-	-
ENBDON_00810	101510.RHA1_ro00388	6.24e-96	281.0	COG0662@1|root,COG0662@2|Bacteria,2GSNK@201174|Actinobacteria,4G1K1@85025|Nocardiaceae	201174|Actinobacteria	G	Lipocalin-like domain	-	-	-	-	-	-	-	-	-	-	-	-	Lipocalin_5
ENBDON_00812	1429046.RR21198_3298	1.41e-103	301.0	COG1853@1|root,COG1853@2|Bacteria,2GPJS@201174|Actinobacteria,4G5KZ@85025|Nocardiaceae	201174|Actinobacteria	S	Flavin reductase like domain	-	-	-	ko:K16048	ko00984,ko01100,map00984,map01100	-	R09819	RC00236	ko00000,ko00001,ko01000	-	-	-	Flavin_Reduct
ENBDON_00813	101510.RHA1_ro00384	1.83e-130	373.0	COG1309@1|root,COG1309@2|Bacteria,2HJ62@201174|Actinobacteria,4G5FF@85025|Nocardiaceae	201174|Actinobacteria	K	Bacterial regulatory proteins, tetR family	-	-	-	-	-	-	-	-	-	-	-	-	TetR_N
ENBDON_00814	1429046.RR21198_3300	1.06e-311	852.0	COG1012@1|root,COG1012@2|Bacteria,2GIWZ@201174|Actinobacteria,4FVYU@85025|Nocardiaceae	201174|Actinobacteria	C	Belongs to the aldehyde dehydrogenase family	-	-	1.2.1.3,1.2.1.8	ko:K00128,ko:K00130	ko00010,ko00053,ko00071,ko00260,ko00280,ko00310,ko00330,ko00340,ko00380,ko00410,ko00561,ko00620,ko00625,ko00903,ko00981,ko01100,ko01110,ko01120,ko01130,map00010,map00053,map00071,map00260,map00280,map00310,map00330,map00340,map00380,map00410,map00561,map00620,map00625,map00903,map00981,map01100,map01110,map01120,map01130	M00135,M00555	R00264,R00631,R00710,R00904,R01752,R01986,R02549,R02565,R02566,R02678,R02940,R02957,R03283,R03869,R04065,R04506,R04903,R05050,R05237,R05238,R05286,R06366,R08146	RC00047,RC00071,RC00080,RC00186,RC00218,RC00242,RC00816,RC01500	ko00000,ko00001,ko00002,ko01000	-	-	-	Aldedh
ENBDON_00815	1429046.RR21198_3301	3.63e-290	791.0	COG4638@1|root,COG4638@2|Bacteria,2H3PD@201174|Actinobacteria,4G6NY@85025|Nocardiaceae	201174|Actinobacteria	P	Ring hydroxylating alpha subunit (catalytic domain)	-	-	-	-	-	-	-	-	-	-	-	-	Rieske,Ring_hydroxyl_A
ENBDON_00816	1429046.RR21198_3302	3.5e-292	801.0	COG0477@1|root,COG2814@2|Bacteria,2GM2G@201174|Actinobacteria,4FXUX@85025|Nocardiaceae	201174|Actinobacteria	EGP	Protein involved in sugar porter activity, transport and response to antibiotic	-	-	-	ko:K05548	-	-	-	-	ko00000,ko02000	2.A.1.15	-	-	MFS_1,MFS_4
ENBDON_00817	1429046.RR21198_3303	1.3e-26	97.4	2C7N6@1|root,2ZFXQ@2|Bacteria,2GQSQ@201174|Actinobacteria,4G44C@85025|Nocardiaceae	201174|Actinobacteria	-	-	-	-	-	-	-	-	-	-	-	-	-	-	DUF1059
ENBDON_00818	1429046.RR21198_3304	7.4e-197	547.0	COG1028@1|root,COG1028@2|Bacteria,2ICPI@201174|Actinobacteria,4FVG3@85025|Nocardiaceae	201174|Actinobacteria	IQ	Belongs to the short-chain dehydrogenases reductases (SDR) family	-	-	-	-	-	-	-	-	-	-	-	-	adh_short,adh_short_C2
ENBDON_00819	101510.RHA1_ro00378	1.41e-39	132.0	COG1141@1|root,COG1141@2|Bacteria,2H1A3@201174|Actinobacteria,4G4GW@85025|Nocardiaceae	201174|Actinobacteria	C	4Fe-4S single cluster domain of Ferredoxin I	-	-	-	ko:K05337	-	-	-	-	ko00000	-	-	-	Fer4_13,Fer4_15
ENBDON_00820	1429046.RR21198_3306	4.95e-257	709.0	COG2124@1|root,COG2124@2|Bacteria,2HSPE@201174|Actinobacteria,4G10X@85025|Nocardiaceae	201174|Actinobacteria	Q	Cytochrome P450	-	-	-	-	-	-	-	-	-	-	-	-	p450
ENBDON_00821	1429046.RR21198_3307	1.27e-281	771.0	COG2124@1|root,COG2124@2|Bacteria,2HEQH@201174|Actinobacteria,4G63M@85025|Nocardiaceae	201174|Actinobacteria	C	Cytochrome P450	-	-	-	-	-	-	-	-	-	-	-	-	p450
ENBDON_00822	1429046.RR21198_3308	6.58e-275	752.0	COG1960@1|root,COG1960@2|Bacteria,2GM3V@201174|Actinobacteria,4FVPU@85025|Nocardiaceae	201174|Actinobacteria	I	acyl-CoA dehydrogenase	-	-	1.3.8.7	ko:K00249	ko00071,ko00280,ko00410,ko00640,ko01100,ko01110,ko01130,ko01200,ko01212,ko03320,map00071,map00280,map00410,map00640,map01100,map01110,map01130,map01200,map01212,map03320	M00013,M00036,M00087	R00924,R01175,R01279,R02661,R03172,R03777,R03857,R03990,R04095,R04432,R04751,R04754	RC00052,RC00068,RC00076,RC00095,RC00148,RC00246	ko00000,ko00001,ko00002,ko01000	-	-	-	Acyl-CoA_dh_1,Acyl-CoA_dh_M,Acyl-CoA_dh_N
ENBDON_00823	1429046.RR21198_3309	2.37e-296	806.0	COG4638@1|root,COG4638@2|Bacteria,2GTMT@201174|Actinobacteria,4FWFD@85025|Nocardiaceae	201174|Actinobacteria	P	Protein involved in iron ion binding, oxidoreductase activity, acting on single donors with incorporation of molecular oxygen, incorporation of two atoms of oxygen, electron transport and aromatic compound	-	-	-	-	-	-	-	-	-	-	-	-	Rieske,Ring_hydroxyl_A
ENBDON_00824	1429046.RR21198_3310	4.66e-210	584.0	COG3153@1|root,COG3153@2|Bacteria,2GUF1@201174|Actinobacteria,4FZ8U@85025|Nocardiaceae	201174|Actinobacteria	S	acetyltransferase	-	-	2.3.1.189	ko:K15520	-	-	-	-	ko00000,ko01000	-	-	-	Acetyltransf_1
ENBDON_00825	1429046.RR21198_3311	9.06e-193	535.0	COG1028@1|root,COG1028@2|Bacteria,2GJ9X@201174|Actinobacteria,4FWH7@85025|Nocardiaceae	201174|Actinobacteria	IQ	Enoyl-(Acyl carrier protein) reductase	-	-	-	-	-	-	-	-	-	-	-	-	adh_short_C2
ENBDON_00826	1429046.RR21198_3312	0.0	872.0	COG1012@1|root,COG1012@2|Bacteria,2GIWZ@201174|Actinobacteria,4FTXB@85025|Nocardiaceae	201174|Actinobacteria	C	Belongs to the aldehyde dehydrogenase family	-	-	1.2.1.8	ko:K00130	ko00260,ko01100,map00260,map01100	M00555	R02565,R02566	RC00080	ko00000,ko00001,ko00002,ko01000	-	-	-	Aldedh
ENBDON_00827	1429046.RR21198_3313	2.67e-147	416.0	COG1309@1|root,COG1309@2|Bacteria,2HHI9@201174|Actinobacteria,4FYU7@85025|Nocardiaceae	201174|Actinobacteria	K	Tetracyclin repressor, C-terminal all-alpha domain	-	-	-	-	-	-	-	-	-	-	-	-	TetR_C,TetR_N
ENBDON_00828	1429046.RR21198_3314	1.82e-194	540.0	COG2267@1|root,COG2267@2|Bacteria,2I480@201174|Actinobacteria,4FUZP@85025|Nocardiaceae	201174|Actinobacteria	I	Serine aminopeptidase, S33	-	-	-	-	-	-	-	-	-	-	-	-	Abhydrolase_1,Hydrolase_4
ENBDON_00829	1429046.RR21198_3315	2.43e-171	480.0	COG1028@1|root,COG1028@2|Bacteria,2GJU1@201174|Actinobacteria,4FUY7@85025|Nocardiaceae	201174|Actinobacteria	IQ	COG1028 Dehydrogenases with different specificities (related to short-chain alcohol dehydrogenases)	-	-	1.1.1.69	ko:K00046	-	-	-	-	ko00000,ko01000	-	-	-	adh_short_C2
ENBDON_00830	1429046.RR21198_3316	6.2e-218	603.0	COG1018@1|root,COG1018@2|Bacteria,2GJCV@201174|Actinobacteria,4FU7D@85025|Nocardiaceae	201174|Actinobacteria	C	Protein involved in monooxygenase activity, electron transporter activity, iron ion binding, electron transport, transport and aromatic compound catabolism	-	-	-	-	-	-	-	-	-	-	-	-	FAD_binding_6,Fer2,NAD_binding_1
ENBDON_00831	1429046.RR21198_3317	2.6e-282	778.0	COG0477@1|root,COG2814@2|Bacteria,2H8UD@201174|Actinobacteria,4FV1Y@85025|Nocardiaceae	201174|Actinobacteria	EGP	Major Facilitator Superfamily	-	-	-	-	-	-	-	-	-	-	-	-	MFS_1
ENBDON_00832	1429046.RR21198_3318	0.0	929.0	COG0318@1|root,COG0318@2|Bacteria,2GIUC@201174|Actinobacteria,4FZHA@85025|Nocardiaceae	201174|Actinobacteria	IQ	AMP-binding enzyme C-terminal domain	-	-	-	ko:K00666	-	-	-	-	ko00000,ko01000,ko01004	-	-	-	AMP-binding,AMP-binding_C
ENBDON_00833	1429046.RR21198_3319	2.25e-180	504.0	COG1024@1|root,COG1024@2|Bacteria,2HEIS@201174|Actinobacteria,4FWC0@85025|Nocardiaceae	201174|Actinobacteria	I	enoyl-CoA hydratase	-	-	-	-	-	-	-	-	-	-	-	-	ECH_1
ENBDON_00834	1429046.RR21198_3320	3.31e-133	380.0	COG1309@1|root,COG1309@2|Bacteria,2IFRU@201174|Actinobacteria,4G0BV@85025|Nocardiaceae	201174|Actinobacteria	K	transcriptional regulator	-	-	-	-	-	-	-	-	-	-	-	-	TetR_N
ENBDON_00835	1429046.RR21198_1065	1.54e-171	480.0	COG1028@1|root,COG1028@2|Bacteria,2GX9R@201174|Actinobacteria,4G8JT@85025|Nocardiaceae	201174|Actinobacteria	IQ	KR domain	-	-	-	ko:K07535	ko00362,ko01120,ko01220,map00362,map01120,map01220	M00540	R05582	RC00154	ko00000,ko00001,ko00002,ko01000	-	-	-	adh_short_C2
ENBDON_00836	1429046.RR21198_1064	2.68e-169	476.0	COG1082@1|root,COG1082@2|Bacteria,2I9QD@201174|Actinobacteria,4G0VJ@85025|Nocardiaceae	201174|Actinobacteria	G	Xylose isomerase-like TIM barrel	-	-	-	-	-	-	-	-	-	-	-	-	AP_endonuc_2
ENBDON_00837	1429046.RR21198_1063	2.14e-313	856.0	COG0477@1|root,COG0477@2|Bacteria,2GIYR@201174|Actinobacteria,4FVJB@85025|Nocardiaceae	201174|Actinobacteria	EGP	transporter	-	-	-	-	-	-	-	-	-	-	-	-	MFS_1,Sugar_tr
ENBDON_00838	1429046.RR21198_1062	2.33e-205	568.0	COG3959@1|root,COG3959@2|Bacteria,2GJ6M@201174|Actinobacteria,4FV64@85025|Nocardiaceae	201174|Actinobacteria	G	Transketolase, thiamine diphosphate binding domain	-	-	2.2.1.1	ko:K00615	ko00030,ko00710,ko01051,ko01100,ko01110,ko01120,ko01130,ko01200,ko01230,map00030,map00710,map01051,map01100,map01110,map01120,map01130,map01200,map01230	M00004,M00007,M00165,M00167	R01067,R01641,R01830,R06590	RC00032,RC00226,RC00571,RC01560	ko00000,ko00001,ko00002,ko01000	-	-	-	Transketolase_N
ENBDON_00839	1429046.RR21198_1061	1.32e-224	620.0	COG3958@1|root,COG3958@2|Bacteria,2I8VM@201174|Actinobacteria,4FWQW@85025|Nocardiaceae	201174|Actinobacteria	G	Transketolase, pyrimidine binding domain	-	-	2.2.1.1	ko:K00615	ko00030,ko00710,ko01051,ko01100,ko01110,ko01120,ko01130,ko01200,ko01230,map00030,map00710,map01051,map01100,map01110,map01120,map01130,map01200,map01230	M00004,M00007,M00165,M00167	R01067,R01641,R01830,R06590	RC00032,RC00226,RC00571,RC01560	ko00000,ko00001,ko00002,ko01000	-	-	-	Transket_pyr,Transketolase_C
ENBDON_00840	1429046.RR21198_1060	7.94e-141	399.0	COG1802@1|root,COG1802@2|Bacteria,2GJRM@201174|Actinobacteria,4FZSI@85025|Nocardiaceae	201174|Actinobacteria	K	FCD	-	-	-	-	-	-	-	-	-	-	-	-	FCD,GntR
ENBDON_00841	1435356.Y013_00075	1.72e-240	666.0	COG0183@1|root,COG0183@2|Bacteria,2GJAC@201174|Actinobacteria,4FURG@85025|Nocardiaceae	201174|Actinobacteria	I	Belongs to the thiolase family	fadA4	GO:0003674,GO:0003824,GO:0003988,GO:0005575,GO:0005576,GO:0005623,GO:0005886,GO:0006082,GO:0006629,GO:0006631,GO:0006635,GO:0008150,GO:0008152,GO:0009056,GO:0009062,GO:0009605,GO:0009607,GO:0009987,GO:0016020,GO:0016042,GO:0016054,GO:0016408,GO:0016740,GO:0016746,GO:0016747,GO:0019395,GO:0019752,GO:0030258,GO:0032787,GO:0034440,GO:0043207,GO:0043436,GO:0044237,GO:0044238,GO:0044242,GO:0044248,GO:…	2.3.1.9	ko:K00626	ko00071,ko00072,ko00280,ko00310,ko00362,ko00380,ko00620,ko00630,ko00640,ko00650,ko00720,ko00900,ko01100,ko01110,ko01120,ko01130,ko01200,ko01212,ko02020,map00071,map00072,map00280,map00310,map00362,map00380,map00620,map00630,map00640,map00650,map00720,map00900,map01100,map01110,map01120,map01130,map01200,map01212,map02020	M00088,M00095,M00373,M00374,M00375	R00238,R01177	RC00004,RC00326	ko00000,ko00001,ko00002,ko01000,ko04147	-	-	-	Thiolase_C,Thiolase_N
ENBDON_00842	1429046.RR21198_4421	1.97e-151	426.0	COG2057@1|root,COG2057@2|Bacteria,2GKV9@201174|Actinobacteria,4FWFR@85025|Nocardiaceae	201174|Actinobacteria	I	transferase	scoB	-	2.8.3.5	ko:K01029	ko00072,ko00280,ko00650,map00072,map00280,map00650	-	R00410	RC00014	ko00000,ko00001,ko01000	-	-	-	CoA_trans
ENBDON_00843	1429046.RR21198_4422	3.52e-176	491.0	COG1788@1|root,COG1788@2|Bacteria,2GK61@201174|Actinobacteria,4FWES@85025|Nocardiaceae	201174|Actinobacteria	I	transferase	scoA	-	2.8.3.5	ko:K01028	ko00072,ko00280,ko00650,map00072,map00280,map00650	-	R00410	RC00014	ko00000,ko00001,ko01000	-	-	-	CoA_trans
ENBDON_00844	1429046.RR21198_4423	3.97e-172	482.0	COG1414@1|root,COG1414@2|Bacteria,2GKF4@201174|Actinobacteria,4FWPZ@85025|Nocardiaceae	201174|Actinobacteria	K	transcriptional regulator	-	-	-	-	-	-	-	-	-	-	-	-	HTH_IclR,IclR
ENBDON_00845	1240349.ANGC01000088_gene134	1.67e-246	677.0	COG3173@1|root,COG3173@2|Bacteria,2GJT0@201174|Actinobacteria,4FUKX@85025|Nocardiaceae	201174|Actinobacteria	S	Aminoglycoside phosphotransferase	-	-	-	-	-	-	-	-	-	-	-	-	APH
ENBDON_00846	1240349.ANGC01000088_gene133	5.58e-174	486.0	COG2267@1|root,COG2267@2|Bacteria,2GKZI@201174|Actinobacteria,4G9XK@85025|Nocardiaceae	201174|Actinobacteria	I	Serine aminopeptidase, S33	rsbQ	-	-	ko:K19707	-	-	-	-	ko00000,ko03021	-	-	-	Abhydrolase_1,Abhydrolase_4,Abhydrolase_6
ENBDON_00847	1240349.ANGC01000088_gene132	8.45e-283	775.0	COG2208@1|root,COG2208@2|Bacteria,2GKUC@201174|Actinobacteria,4FY4Y@85025|Nocardiaceae	201174|Actinobacteria	KT	Stage II sporulation protein E (SpoIIE)	-	-	3.1.3.3	ko:K07315	-	-	-	-	ko00000,ko01000,ko03021	-	-	-	PAS_4,PAS_9,SpoIIE
ENBDON_00848	1240349.ANGC01000088_gene131	8.89e-190	528.0	COG1024@1|root,COG1024@2|Bacteria,2GJDK@201174|Actinobacteria,4FX4V@85025|Nocardiaceae	201174|Actinobacteria	I	Enoyl-CoA hydratase/isomerase	-	-	5.3.3.18	ko:K15866	ko00360,ko01120,map00360,map01120	-	R09837,R09839	RC00004,RC00326,RC02689,RC03003	ko00000,ko00001,ko01000	-	-	-	ECH_1
ENBDON_00849	1240349.ANGC01000088_gene130	4.63e-253	693.0	COG3173@1|root,COG3173@2|Bacteria,2GJT0@201174|Actinobacteria,4FUKX@85025|Nocardiaceae	201174|Actinobacteria	S	Aminoglycoside phosphotransferase	fadE36_1	-	-	-	-	-	-	-	-	-	-	-	APH
ENBDON_00850	1240349.ANGC01000088_gene129	2.47e-293	800.0	COG1960@1|root,COG1960@2|Bacteria,2GJDT@201174|Actinobacteria,4FWQY@85025|Nocardiaceae	201174|Actinobacteria	I	acyl-CoA dehydrogenase	-	-	-	-	-	-	-	-	-	-	-	-	Acyl-CoA_dh_1,Acyl-CoA_dh_M,Acyl-CoA_dh_N
ENBDON_00851	1240349.ANGC01000075_gene4879	7.72e-237	654.0	COG1960@1|root,COG1960@2|Bacteria,2GKVN@201174|Actinobacteria,4FYUQ@85025|Nocardiaceae	201174|Actinobacteria	I	acyl-CoA dehydrogenase	fadE18_1	-	-	-	-	-	-	-	-	-	-	-	Acyl-CoA_dh_1,Acyl-CoA_dh_N
ENBDON_00852	1240349.ANGC01000075_gene4878	0.0	1084.0	COG0318@1|root,COG0318@2|Bacteria,2GIUC@201174|Actinobacteria,4FUZV@85025|Nocardiaceae	201174|Actinobacteria	IQ	synthetase	-	-	6.2.1.3	ko:K01897	ko00061,ko00071,ko01100,ko01212,ko02024,ko03320,ko04146,ko04216,ko04714,ko04920,map00061,map00071,map01100,map01212,map02024,map03320,map04146,map04216,map04714,map04920	M00086	R01280	RC00004,RC00014	ko00000,ko00001,ko00002,ko01000,ko01004,ko04147	4.C.1.1	-	-	AMP-binding,AMP-binding_C
ENBDON_00853	1240349.ANGC01000075_gene4877	1.59e-211	583.0	COG1946@1|root,COG1946@2|Bacteria,2GJ1B@201174|Actinobacteria,4FZZE@85025|Nocardiaceae	201174|Actinobacteria	I	Acyl-CoA thioesterase	-	-	-	ko:K10805	ko01040,map01040	-	-	-	ko00000,ko00001,ko01000,ko01004	-	-	-	4HBT_3
ENBDON_00854	1240349.ANGC01000075_gene4876	1.96e-145	410.0	COG1011@1|root,COG1011@2|Bacteria,2I8XE@201174|Actinobacteria,4FYZE@85025|Nocardiaceae	201174|Actinobacteria	S	hydrolase	-	-	-	ko:K07025	-	-	-	-	ko00000	-	-	-	HAD_2,Hydrolase
ENBDON_00855	1240349.ANGC01000075_gene4875	7.67e-135	383.0	2DM23@1|root,31DUR@2|Bacteria,2GIYZ@201174|Actinobacteria,4G0NI@85025|Nocardiaceae	201174|Actinobacteria	-	-	-	-	-	-	-	-	-	-	-	-	-	-	BON,DUF2204,NTP_transf_5
ENBDON_00856	1429046.RR21198_4433	1.6e-53	168.0	2EJDB@1|root,33D4C@2|Bacteria,2GSNI@201174|Actinobacteria,4G4M3@85025|Nocardiaceae	201174|Actinobacteria	S	BON domain	-	-	-	-	-	-	-	-	-	-	-	-	BON
ENBDON_00857	1240349.ANGC01000075_gene4873	2.59e-169	473.0	COG2129@1|root,COG2129@2|Bacteria,2GJ72@201174|Actinobacteria,4FVD2@85025|Nocardiaceae	201174|Actinobacteria	S	Calcineurin-like phosphoesterase superfamily domain	-	-	-	-	-	-	-	-	-	-	-	-	Metallophos,Metallophos_2
ENBDON_00858	1240349.ANGC01000075_gene4872	6.27e-248	680.0	COG2130@1|root,COG2130@2|Bacteria,2GKR8@201174|Actinobacteria,4FVAH@85025|Nocardiaceae	201174|Actinobacteria	S	N-terminal domain of oxidoreductase	-	-	-	ko:K07119	-	-	-	-	ko00000	-	-	-	ADH_N_2,ADH_zinc_N
ENBDON_00859	1240349.ANGC01000075_gene4871	6.6e-163	462.0	COG0675@1|root,COG0675@2|Bacteria,2GM6K@201174|Actinobacteria,4FXXV@85025|Nocardiaceae	201174|Actinobacteria	L	Putative transposase DNA-binding domain	-	-	-	ko:K07496	-	-	-	-	ko00000	-	-	-	OrfB_IS605,OrfB_Zn_ribbon
ENBDON_00860	1240349.ANGC01000075_gene4870	0.0	1154.0	COG0318@1|root,COG0318@2|Bacteria,2GMWA@201174|Actinobacteria,4FX03@85025|Nocardiaceae	201174|Actinobacteria	IQ	AMP-binding enzyme C-terminal domain	-	-	6.2.1.3	ko:K00666,ko:K01897	ko00061,ko00071,ko01100,ko01212,ko02024,ko03320,ko04146,ko04216,ko04714,ko04920,map00061,map00071,map01100,map01212,map02024,map03320,map04146,map04216,map04714,map04920	M00086	R01280	RC00004,RC00014	ko00000,ko00001,ko00002,ko01000,ko01004,ko04147	4.C.1.1	-	-	AMP-binding,AMP-binding_C
ENBDON_00861	1240349.ANGC01000075_gene4869	0.0	909.0	COG3486@1|root,COG3486@2|Bacteria,2GKTG@201174|Actinobacteria,4FWNC@85025|Nocardiaceae	201174|Actinobacteria	Q	L-lysine 6-monooxygenase (NADPH-requiring)	-	-	1.14.13.195,1.14.13.196	ko:K10531	-	-	-	-	ko00000,ko01000	-	-	-	K_oxygenase
ENBDON_00862	1429046.RR21198_4438	7.88e-54	168.0	COG3251@1|root,COG3251@2|Bacteria,2GQFU@201174|Actinobacteria,4G2YD@85025|Nocardiaceae	201174|Actinobacteria	S	MbtH-like protein	-	-	-	ko:K05375	ko00261,ko01130,map00261,map01130	M00736	R10880	RC00064,RC00141,RC03296,RC03297,RC03298	ko00000,ko00001,ko00002	-	-	-	MbtH
ENBDON_00863	1429046.RR21198_4439	0.0	879.0	COG2966@1|root,COG3610@1|root,COG2966@2|Bacteria,COG3610@2|Bacteria,2GJMC@201174|Actinobacteria,4FX5M@85025|Nocardiaceae	201174|Actinobacteria	S	Threonine/Serine exporter, ThrE	thrE	-	-	-	-	-	-	-	-	-	-	-	ThrE,ThrE_2
ENBDON_00865	1240349.ANGC01000075_gene4866	9.4e-48	153.0	2AR2C@1|root,31GBC@2|Bacteria,2HK0Z@201174|Actinobacteria,4G7QH@85025|Nocardiaceae	201174|Actinobacteria	-	-	-	-	-	-	-	-	-	-	-	-	-	-	-
ENBDON_00866	1240349.ANGC01000075_gene4865	2.06e-114	328.0	COG1733@1|root,COG1733@2|Bacteria,2IMR3@201174|Actinobacteria,4G0F6@85025|Nocardiaceae	201174|Actinobacteria	K	HxlR-like helix-turn-helix	-	-	-	-	-	-	-	-	-	-	-	-	HxlR
ENBDON_00868	1240349.ANGC01000011_gene228	7.73e-206	582.0	COG0515@1|root,COG0515@2|Bacteria,2H5ZS@201174|Actinobacteria,4FZN3@85025|Nocardiaceae	201174|Actinobacteria	KLT	protein serine threonine kinase activity, protein-tyrosine kinase activity, ATP binding, penicillin binding and protein amino acid phosphorylation	-	-	2.7.11.1	ko:K08282,ko:K08884,ko:K12132	-	-	-	-	ko00000,ko01000,ko01001	-	-	-	Pkinase
ENBDON_00869	1429046.RR21198_4449	0.0	956.0	COG1233@1|root,COG1233@2|Bacteria,2GP0A@201174|Actinobacteria,4G02U@85025|Nocardiaceae	201174|Actinobacteria	Q	Flavin containing amine oxidoreductase	-	-	1.3.99.23,5.2.1.13	ko:K09516,ko:K09835	ko00830,ko00906,ko01100,ko01110,map00830,map00906,map01100,map01110	M00097	R07163,R07512	RC01835,RC01960	ko00000,ko00001,ko00002,ko01000	-	-	-	Amino_oxidase
ENBDON_00870	1429046.RR21198_4450	2.35e-87	258.0	2EC8S@1|root,33677@2|Bacteria,2GUT2@201174|Actinobacteria,4G3D7@85025|Nocardiaceae	201174|Actinobacteria	-	-	-	-	-	-	-	-	-	-	-	-	-	-	-
ENBDON_00871	1240349.ANGC01000011_gene231	4.25e-181	504.0	COG0346@1|root,COG4319@1|root,COG0346@2|Bacteria,COG4319@2|Bacteria,2II1S@201174|Actinobacteria,4G18S@85025|Nocardiaceae	201174|Actinobacteria	E	SnoaL-like domain	-	-	-	-	-	-	-	-	-	-	-	-	Glyoxalase,SnoaL_3
ENBDON_00872	1240349.ANGC01000011_gene232	5.05e-79	248.0	2AG2I@1|root,3166W@2|Bacteria,2GM9W@201174|Actinobacteria,4FXMC@85025|Nocardiaceae	201174|Actinobacteria	-	-	-	-	-	-	-	-	-	-	-	-	-	-	-
ENBDON_00873	1240349.ANGC01000011_gene233	1.18e-39	131.0	2CIE6@1|root,349NW@2|Bacteria,2GXDZ@201174|Actinobacteria,4G4ZN@85025|Nocardiaceae	201174|Actinobacteria	-	-	-	-	-	-	-	-	-	-	-	-	-	-	-
ENBDON_00874	1240349.ANGC01000011_gene234	7.55e-266	730.0	COG3391@1|root,COG3391@2|Bacteria,2H4SV@201174|Actinobacteria,4G9KA@85025|Nocardiaceae	201174|Actinobacteria	S	Bacterial Ig-like domain (group 3)	-	-	-	ko:K20276	ko02024,map02024	-	-	-	ko00000,ko00001	-	-	-	Big_3_5,TIG
ENBDON_00875	1429046.RR21198_4455	5.18e-159	446.0	COG0745@1|root,COG0745@2|Bacteria,2GIZB@201174|Actinobacteria,4FWYQ@85025|Nocardiaceae	201174|Actinobacteria	T	Transcriptional regulatory protein, C terminal	phoP	-	-	ko:K02483	-	-	-	-	ko00000,ko02022	-	-	-	Response_reg,Trans_reg_C
ENBDON_00876	1240349.ANGC01000011_gene236	2.16e-303	831.0	COG5002@1|root,COG5002@2|Bacteria,2I2DU@201174|Actinobacteria,4FTXC@85025|Nocardiaceae	201174|Actinobacteria	T	His Kinase A (phosphoacceptor) domain	phoR	-	2.7.13.3	ko:K02484	-	-	-	-	ko00000,ko01000,ko01001,ko02022	-	-	-	HAMP,HATPase_c,HisKA
ENBDON_00877	1240349.ANGC01000011_gene237	1.84e-259	711.0	COG3243@1|root,COG3243@2|Bacteria,2GP7I@201174|Actinobacteria,4FXA5@85025|Nocardiaceae	201174|Actinobacteria	I	synthetase	-	-	-	ko:K03821	ko00650,map00650	-	R04254	RC00004	ko00000,ko00001,ko01000	-	-	-	Abhydrolase_1,Abhydrolase_6
ENBDON_00878	1240349.ANGC01000011_gene238	1.33e-99	288.0	COG0537@1|root,COG0537@2|Bacteria,2IKWU@201174|Actinobacteria,4G0GB@85025|Nocardiaceae	201174|Actinobacteria	FG	Scavenger mRNA decapping enzyme C-term binding	hit	-	-	ko:K02503	-	-	-	-	ko00000,ko04147	-	-	-	HIT
ENBDON_00879	1240349.ANGC01000011_gene239	3.92e-152	429.0	COG0572@1|root,COG0572@2|Bacteria,2I9H4@201174|Actinobacteria,4G0GK@85025|Nocardiaceae	201174|Actinobacteria	F	Fructose transport system kinase	-	-	-	-	-	-	-	-	-	-	-	-	AAA_18,AAA_30,PRK
ENBDON_00880	1429046.RR21198_4460	1.55e-291	798.0	COG0151@1|root,COG0151@2|Bacteria,2I2F5@201174|Actinobacteria,4FWGX@85025|Nocardiaceae	201174|Actinobacteria	F	Belongs to the GARS family	purD	GO:0008150,GO:0040007	6.3.3.1,6.3.4.13	ko:K01945,ko:K11788	ko00230,ko01100,ko01110,ko01130,map00230,map01100,map01110,map01130	M00048	R04144,R04208	RC00090,RC00166,RC01100	ko00000,ko00001,ko00002,ko01000	-	-	-	GARS_A,GARS_C,GARS_N
ENBDON_00881	1240349.ANGC01000011_gene241	8.04e-277	758.0	COG0436@1|root,COG0436@2|Bacteria,2GJ7R@201174|Actinobacteria,4FUI0@85025|Nocardiaceae	201174|Actinobacteria	E	Aminotransferase class I and II	aspB	-	2.6.1.1,2.6.1.17,2.6.1.2,2.6.1.66	ko:K00812,ko:K14260,ko:K14267	ko00220,ko00250,ko00270,ko00290,ko00300,ko00330,ko00350,ko00360,ko00400,ko00401,ko00950,ko00960,ko01100,ko01110,ko01120,ko01130,ko01210,ko01230,map00220,map00250,map00270,map00290,map00300,map00330,map00350,map00360,map00400,map00401,map00950,map00960,map01100,map01110,map01120,map01130,map01210,map01230	M00016	R00258,R00355,R00694,R00734,R00896,R01215,R02433,R02619,R04475,R05052	RC00006,RC00008,RC00036	ko00000,ko00001,ko00002,ko01000,ko01007	-	-	-	Aminotran_1_2
ENBDON_00882	1240349.ANGC01000011_gene242	3.19e-139	394.0	COG3226@1|root,COG3226@2|Bacteria,2HUE7@201174|Actinobacteria,4FVQV@85025|Nocardiaceae	201174|Actinobacteria	K	TetR Family	-	-	-	-	-	-	-	-	-	-	-	-	TetR_C_6,TetR_N
ENBDON_00883	1240349.ANGC01000011_gene243	1.23e-311	852.0	COG0015@1|root,COG0015@2|Bacteria,2GKBR@201174|Actinobacteria,4FUGF@85025|Nocardiaceae	201174|Actinobacteria	F	Belongs to the lyase 1 family. Adenylosuccinate lyase subfamily	purB	-	4.3.2.2	ko:K01756	ko00230,ko00250,ko01100,ko01110,ko01130,map00230,map00250,map01100,map01110,map01130	M00048,M00049	R01083,R04559	RC00379,RC00444,RC00445	ko00000,ko00001,ko00002,ko01000	-	-	-	ADSL_C,Lyase_1
ENBDON_00884	1429046.RR21198_4464	9.04e-137	388.0	COG1309@1|root,COG1309@2|Bacteria,2GNR9@201174|Actinobacteria,4FZMY@85025|Nocardiaceae	201174|Actinobacteria	K	Bacterial regulatory proteins, tetR family	-	-	-	-	-	-	-	-	-	-	-	-	TetR_N
ENBDON_00885	1240349.ANGC01000011_gene245	3.93e-94	275.0	COG0537@1|root,COG0537@2|Bacteria,2INIP@201174|Actinobacteria,4G0M4@85025|Nocardiaceae	201174|Actinobacteria	FG	Scavenger mRNA decapping enzyme C-term binding	-	-	-	-	-	-	-	-	-	-	-	-	HIT
ENBDON_00886	1240349.ANGC01000011_gene246	2.53e-24	93.6	2BNHV@1|root,32H6A@2|Bacteria,2HKGF@201174|Actinobacteria,4G8AU@85025|Nocardiaceae	201174|Actinobacteria	-	-	-	-	-	-	-	-	-	-	-	-	-	-	-
ENBDON_00887	1429046.RR21198_4468	1.84e-280	767.0	COG1680@1|root,COG1680@2|Bacteria,2GJJB@201174|Actinobacteria,4FXBC@85025|Nocardiaceae	201174|Actinobacteria	V	COG1680 Beta-lactamase class C and other penicillin binding proteins	-	-	-	-	-	-	-	-	-	-	-	-	Beta-lactamase
ENBDON_00888	1240349.ANGC01000011_gene249	8.14e-301	821.0	COG0477@1|root,COG0477@2|Bacteria,2GIYR@201174|Actinobacteria,4FVJW@85025|Nocardiaceae	201174|Actinobacteria	EGP	Sugar (and other) transporter	proP	-	-	ko:K03762	-	-	-	-	ko00000,ko02000	2.A.1.6.4	-	-	MFS_1,Sugar_tr
ENBDON_00889	1240349.ANGC01000011_gene250	1.48e-98	290.0	COG1846@1|root,COG1846@2|Bacteria,2IMA9@201174|Actinobacteria,4G0GP@85025|Nocardiaceae	201174|Actinobacteria	K	helix_turn_helix multiple antibiotic resistance protein	ohrR	-	-	-	-	-	-	-	-	-	-	-	MarR
ENBDON_00890	1240349.ANGC01000011_gene252	1.85e-53	167.0	COG2169@1|root,COG2169@2|Bacteria,2IQMA@201174|Actinobacteria,4G3ZH@85025|Nocardiaceae	201174|Actinobacteria	F	Metal binding domain of Ada	-	-	-	-	-	-	-	-	-	-	-	-	Ada_Zn_binding
ENBDON_00891	1240349.ANGC01000011_gene253	2.05e-172	481.0	COG3826@1|root,COG3826@2|Bacteria,2GK65@201174|Actinobacteria,4FVG8@85025|Nocardiaceae	201174|Actinobacteria	S	Oxygenase, catalysing oxidative methylation of damaged DNA	-	-	-	ko:K09990	-	-	-	-	ko00000	-	-	-	Oxygenase-NA
ENBDON_00892	1240349.ANGC01000011_gene254	1.43e-96	281.0	COG1846@1|root,COG1846@2|Bacteria,2IHP0@201174|Actinobacteria,4G2U4@85025|Nocardiaceae	201174|Actinobacteria	K	helix_turn_helix multiple antibiotic resistance protein	-	-	-	-	-	-	-	-	-	-	-	-	MarR,MarR_2
ENBDON_00893	1429046.RR21198_4489	0.0	1081.0	COG1132@1|root,COG1132@2|Bacteria,2GITR@201174|Actinobacteria,4FU61@85025|Nocardiaceae	201174|Actinobacteria	V	ABC transporter transmembrane region	-	-	-	ko:K06147	-	-	-	-	ko00000,ko02000	3.A.1.106,3.A.1.109,3.A.1.21	-	-	ABC_membrane,ABC_tran
ENBDON_00894	1240349.ANGC01000011_gene256	3.69e-150	422.0	COG1535@1|root,COG1535@2|Bacteria,2GK5M@201174|Actinobacteria,4FWAK@85025|Nocardiaceae	201174|Actinobacteria	Q	Isochorismatase family	dhbB	-	3.3.2.1,6.3.2.14	ko:K01252	ko01053,ko01110,ko01130,map01053,map01110,map01130	-	R03037,R07644	RC00162,RC00350,RC02148,RC03046	ko00000,ko00001,ko01000,ko01008	-	-	-	Isochorismatase,PP-binding
ENBDON_00895	1240349.ANGC01000011_gene257	0.0	1031.0	COG1021@1|root,COG1021@2|Bacteria,2I2IR@201174|Actinobacteria,4FTVU@85025|Nocardiaceae	201174|Actinobacteria	Q	AMP-binding enzyme C-terminal domain	entE	-	2.7.7.58,6.3.2.14	ko:K02363,ko:K12238	ko01053,ko01110,ko01130,map01053,map01110,map01130	-	R07644	RC00162,RC03046	ko00000,ko00001,ko01000,ko01008	-	-	-	AMP-binding,AMP-binding_C
ENBDON_00896	1240349.ANGC01000011_gene258	2.26e-168	472.0	COG1028@1|root,COG1028@2|Bacteria,2GP5U@201174|Actinobacteria,4FTWT@85025|Nocardiaceae	201174|Actinobacteria	IQ	Enoyl-(Acyl carrier protein) reductase	dhbA	-	1.3.1.28	ko:K00216	ko01053,ko01110,ko01130,map01053,map01110,map01130	-	R01505	RC00534	ko00000,ko00001,ko01000	-	-	-	adh_short,adh_short_C2
ENBDON_00897	1240349.ANGC01000011_gene259	1.75e-247	683.0	COG1169@1|root,COG1169@2|Bacteria,2GKE8@201174|Actinobacteria,4FU0T@85025|Nocardiaceae	201174|Actinobacteria	HQ	Isochorismate synthase	entC	-	5.4.4.2	ko:K02361,ko:K02552	ko00130,ko01053,ko01100,ko01110,ko01130,map00130,map01053,map01100,map01110,map01130	M00116	R01717	RC00588	ko00000,ko00001,ko00002,ko01000	-	-	iNJ661.Rv3215	Chorismate_bind
ENBDON_00898	1429046.RR21198_4494	0.0	4661.0	COG1020@1|root,COG1020@2|Bacteria,2GISR@201174|Actinobacteria,4FWIF@85025|Nocardiaceae	201174|Actinobacteria	Q	Condensation domain	-	-	-	-	-	-	-	-	-	-	-	-	AMP-binding,AMP-binding_C,Condensation,Methyltransf_12,PP-binding
ENBDON_00899	1240349.ANGC01000011_gene261	2.32e-104	301.0	COG0454@1|root,COG0456@2|Bacteria,2IIPS@201174|Actinobacteria,4G13U@85025|Nocardiaceae	201174|Actinobacteria	K	FR47-like protein	-	-	-	-	-	-	-	-	-	-	-	-	Acetyltransf_1
ENBDON_00900	1240349.ANGC01000011_gene262	4.61e-188	524.0	COG0329@1|root,COG0329@2|Bacteria,2GJDB@201174|Actinobacteria,4FYW8@85025|Nocardiaceae	201174|Actinobacteria	EM	Dihydrodipicolinate synthase	dapA_1	-	3.5.4.22,4.3.3.7	ko:K01714,ko:K21062	ko00261,ko00300,ko00330,ko01100,ko01110,ko01120,ko01130,ko01230,map00261,map00300,map00330,map01100,map01110,map01120,map01130,map01230	M00016,M00525,M00526,M00527	R02280,R10147	RC00679,RC03062,RC03063	ko00000,ko00001,ko00002,ko01000	-	-	-	DHDPS
ENBDON_00901	1240349.ANGC01000011_gene263	2.15e-184	513.0	COG0235@1|root,COG0235@2|Bacteria,2GJ8W@201174|Actinobacteria,4FZAH@85025|Nocardiaceae	201174|Actinobacteria	G	Class II Aldolase and Adducin N-terminal domain	-	-	4.1.2.17	ko:K01628	ko00051,ko01120,map00051,map01120	-	R02262	RC00603,RC00604	ko00000,ko00001,ko01000	-	-	-	Aldolase_II
ENBDON_00902	1240349.ANGC01000011_gene264	5.86e-118	339.0	COG1917@1|root,COG1917@2|Bacteria	2|Bacteria	L	Cupin 2, conserved barrel domain protein	-	-	-	-	-	-	-	-	-	-	-	-	Cupin_2,Globin,HTH_3,HTH_31
ENBDON_00903	1323361.JPOC01000041_gene3610	1.68e-32	121.0	2BEWP@1|root,328NC@2|Bacteria,2HIJS@201174|Actinobacteria,4G48B@85025|Nocardiaceae	201174|Actinobacteria	-	-	-	-	-	-	-	-	-	-	-	-	-	-	-
ENBDON_00904	1240349.ANGC01000011_gene266	2.41e-213	592.0	COG0614@1|root,COG0614@2|Bacteria,2H288@201174|Actinobacteria,4FYDA@85025|Nocardiaceae	201174|Actinobacteria	P	Periplasmic binding protein	-	-	-	ko:K02016	ko02010,map02010	M00240	-	-	ko00000,ko00001,ko00002,ko02000	3.A.1.14	-	-	Peripla_BP_2
ENBDON_00905	1240349.ANGC01000011_gene267	0.0	5499.0	COG1020@1|root,COG1020@2|Bacteria,2GISR@201174|Actinobacteria,4FXNH@85025|Nocardiaceae	201174|Actinobacteria	Q	Condensation domain	-	-	-	ko:K16428,ko:K16429	ko01055,map01055	-	-	-	ko00000,ko00001	-	-	-	AMP-binding,AMP-binding_C,Condensation,PP-binding,Thioesterase
ENBDON_00906	1429046.RR21198_4499	1.61e-44	144.0	COG3433@1|root,COG3433@2|Bacteria,2GSWG@201174|Actinobacteria,4G3VW@85025|Nocardiaceae	201174|Actinobacteria	Q	Phosphopantetheine attachment site	-	-	3.3.2.1,6.3.2.14	ko:K01252	ko01053,ko01110,ko01130,map01053,map01110,map01130	-	R03037,R07644	RC00162,RC00350,RC02148,RC03046	ko00000,ko00001,ko01000,ko01008	-	-	-	PP-binding
ENBDON_00907	1240349.ANGC01000011_gene269	9.32e-262	721.0	COG0477@1|root,COG0477@2|Bacteria,2GKFJ@201174|Actinobacteria,4FVUY@85025|Nocardiaceae	201174|Actinobacteria	EGP	Transmembrane secretion effector	-	-	-	ko:K08225	-	-	-	-	ko00000,ko02000	2.A.1.38	-	-	MFS_1,MFS_3
ENBDON_00908	1240349.ANGC01000011_gene270	1.37e-128	365.0	COG0262@1|root,COG0262@2|Bacteria,2IGE7@201174|Actinobacteria,4G11Q@85025|Nocardiaceae	201174|Actinobacteria	H	RibD C-terminal domain	-	-	-	-	-	-	-	-	-	-	-	-	RibD_C
ENBDON_00910	1240349.ANGC01000011_gene271	3.21e-135	385.0	COG0500@1|root,COG2226@2|Bacteria,2HFGE@201174|Actinobacteria,4FV65@85025|Nocardiaceae	201174|Actinobacteria	Q	Hypothetical methyltransferase	-	-	-	-	-	-	-	-	-	-	-	-	Methyltransf_11
ENBDON_00911	1240349.ANGC01000011_gene272	1.96e-102	296.0	COG3832@1|root,COG3832@2|Bacteria,2ISCU@201174|Actinobacteria,4G1QF@85025|Nocardiaceae	201174|Actinobacteria	S	Activator of Hsp90 ATPase homolog 1-like protein	-	-	-	-	-	-	-	-	-	-	-	-	AHSA1
ENBDON_00912	1240349.ANGC01000011_gene273	1.98e-65	199.0	COG0640@1|root,COG0640@2|Bacteria,2IKWF@201174|Actinobacteria,4G3JU@85025|Nocardiaceae	201174|Actinobacteria	K	Transcriptional regulator	-	-	-	-	-	-	-	-	-	-	-	-	HTH_20
ENBDON_00913	1240349.ANGC01000011_gene274	0.0	999.0	COG0596@1|root,COG0596@2|Bacteria,2GJYS@201174|Actinobacteria,4FUBK@85025|Nocardiaceae	201174|Actinobacteria	S	TAP-like protein	caeA	GO:0003674,GO:0003824,GO:0005575,GO:0005576,GO:0005618,GO:0005622,GO:0005623,GO:0005737,GO:0005829,GO:0005886,GO:0006464,GO:0006807,GO:0008150,GO:0008152,GO:0009405,GO:0009605,GO:0009607,GO:0009987,GO:0016020,GO:0016787,GO:0016788,GO:0019538,GO:0030312,GO:0036211,GO:0043170,GO:0043207,GO:0043412,GO:0043687,GO:0044237,GO:0044238,GO:0044260,GO:0044267,GO:0044403,GO:0044419,GO:0044424,GO:0044444,GO:…	-	-	-	-	-	-	-	-	-	-	Abhydrolase_1
ENBDON_00914	1429046.RR21198_4506	7.96e-158	443.0	COG2357@1|root,COG2357@2|Bacteria,2GKF8@201174|Actinobacteria,4FU8N@85025|Nocardiaceae	201174|Actinobacteria	S	Region found in RelA / SpoT proteins	ywaC	-	2.7.6.5	ko:K07816	ko00230,map00230	-	R00429	RC00002,RC00078	ko00000,ko00001,ko01000	-	-	-	RelA_SpoT
ENBDON_00915	1240349.ANGC01000011_gene277	2.6e-193	536.0	COG2375@1|root,COG2375@2|Bacteria,2GK5X@201174|Actinobacteria,4FYRJ@85025|Nocardiaceae	201174|Actinobacteria	P	Siderophore-interacting protein	mxcB	-	-	-	-	-	-	-	-	-	-	-	FAD_binding_9,Methyltransf_2,SIP
ENBDON_00916	1240349.ANGC01000011_gene278	1.31e-315	863.0	COG0477@1|root,COG0477@2|Bacteria,2GJ09@201174|Actinobacteria,4FWG8@85025|Nocardiaceae	201174|Actinobacteria	EGP	Fungal trichothecene efflux pump (TRI12)	-	-	-	-	-	-	-	-	-	-	-	-	MFS_1
ENBDON_00917	1240349.ANGC01000011_gene279	3.33e-211	583.0	COG0152@1|root,COG0152@2|Bacteria,2GK3H@201174|Actinobacteria,4FWJE@85025|Nocardiaceae	201174|Actinobacteria	F	Belongs to the SAICAR synthetase family	purC	GO:0003674,GO:0003824,GO:0004639,GO:0005575,GO:0005622,GO:0005623,GO:0005737,GO:0006139,GO:0006163,GO:0006164,GO:0006188,GO:0006189,GO:0006725,GO:0006753,GO:0006793,GO:0006796,GO:0006807,GO:0008150,GO:0008152,GO:0009058,GO:0009117,GO:0009123,GO:0009124,GO:0009126,GO:0009127,GO:0009150,GO:0009152,GO:0009156,GO:0009161,GO:0009165,GO:0009167,GO:0009168,GO:0009259,GO:0009260,GO:0009987,GO:0016874,GO:…	6.3.2.6,6.3.4.13	ko:K01923,ko:K01945	ko00230,ko01100,ko01110,ko01130,map00230,map01100,map01110,map01130	M00048	R04144,R04591	RC00064,RC00090,RC00162,RC00166	ko00000,ko00001,ko00002,ko01000	-	-	-	SAICAR_synt
ENBDON_00918	1240349.ANGC01000011_gene280	0.0	1451.0	COG1770@1|root,COG1770@2|Bacteria,2GNA9@201174|Actinobacteria,4FVAF@85025|Nocardiaceae	201174|Actinobacteria	E	Prolyl oligopeptidase, N-terminal beta-propeller domain	ptrB	-	3.4.21.83	ko:K01354	ko05142,ko05143,map05142,map05143	-	-	-	ko00000,ko00001,ko01000,ko01002	-	-	-	Peptidase_S9,Peptidase_S9_N
ENBDON_00919	1240349.ANGC01000011_gene281	5.35e-149	421.0	COG4565@1|root,COG4565@2|Bacteria,2GMAN@201174|Actinobacteria,4FXRK@85025|Nocardiaceae	201174|Actinobacteria	T	transcriptional regulatory protein	-	-	-	-	-	-	-	-	-	-	-	-	HTH_11,HTH_IclR,Response_reg
ENBDON_00920	1429046.RR21198_4512	0.0	941.0	COG3290@1|root,COG3290@2|Bacteria,2GIRZ@201174|Actinobacteria,4FVBR@85025|Nocardiaceae	201174|Actinobacteria	T	Single cache domain 3	-	-	2.7.13.3	ko:K02476	-	-	-	-	ko00000,ko01000,ko01001,ko02022	-	-	-	HATPase_c,PAS_8,sCache_3_2
ENBDON_00921	1429046.RR21198_4513	7.96e-296	812.0	COG1301@1|root,COG1301@2|Bacteria,2GK6U@201174|Actinobacteria,4FVZP@85025|Nocardiaceae	201174|Actinobacteria	C	Belongs to the dicarboxylate amino acid cation symporter (DAACS) (TC 2.A.23) family	dctA	-	-	ko:K11103	ko02020,map02020	-	-	-	ko00000,ko00001,ko02000	2.A.23.1.3,2.A.23.1.6,2.A.23.1.7	-	-	SDF
ENBDON_00922	1240349.ANGC01000011_gene284	9.43e-246	676.0	COG1957@1|root,COG1957@2|Bacteria,2GP6N@201174|Actinobacteria,4FXA3@85025|Nocardiaceae	201174|Actinobacteria	F	Inosine-uridine preferring nucleoside hydrolase	iunH	-	3.2.2.1	ko:K01239,ko:K01250	ko00230,ko00760,ko01100,map00230,map00760,map01100	-	R01245,R01273,R01677,R01770,R02143	RC00033,RC00063,RC00122,RC00318,RC00485	ko00000,ko00001,ko01000	-	-	-	IU_nuc_hydro
ENBDON_00923	1240349.ANGC01000011_gene285	9.59e-215	593.0	COG0583@1|root,COG0583@2|Bacteria,2H6E4@201174|Actinobacteria,4FWXR@85025|Nocardiaceae	201174|Actinobacteria	K	LysR substrate binding domain	oxyR	-	-	ko:K04761	ko02026,map02026	-	-	-	ko00000,ko00001,ko03000	-	-	-	HTH_1,LysR_substrate
ENBDON_00924	1240349.ANGC01000011_gene286	0.0	1000.0	COG3634@1|root,COG3634@2|Bacteria,2H4AX@201174|Actinobacteria,4FXQZ@85025|Nocardiaceae	201174|Actinobacteria	C	Alkyl hydroperoxide reductase	ahpF	-	-	ko:K03387	-	-	-	-	ko00000,ko01000	-	-	-	Pyr_redox_2,Thioredoxin_3
ENBDON_00925	1240349.ANGC01000011_gene287	8.96e-134	379.0	COG0450@1|root,COG0450@2|Bacteria,2GM74@201174|Actinobacteria,4FV7C@85025|Nocardiaceae	201174|Actinobacteria	O	Redoxin	ahpC	-	1.11.1.15	ko:K03386	ko04214,map04214	-	-	-	ko00000,ko00001,ko01000,ko04147	-	-	-	1-cysPrx_C,AhpC-TSA
ENBDON_00926	1240349.ANGC01000011_gene288	6.38e-283	777.0	COG0491@1|root,COG0491@2|Bacteria,2H8JM@201174|Actinobacteria,4FX74@85025|Nocardiaceae	201174|Actinobacteria	S	Metallo-beta-lactamase superfamily	-	-	-	-	-	-	-	-	-	-	-	-	Lactamase_B
ENBDON_00927	1240349.ANGC01000011_gene289	1.97e-174	486.0	COG1656@1|root,COG1656@2|Bacteria,2GMQR@201174|Actinobacteria,4FZ3N@85025|Nocardiaceae	201174|Actinobacteria	T	Mut7-C ubiquitin	-	-	-	ko:K09122	-	-	-	-	ko00000	-	-	-	Mut7-C,Ub-Mut7C
ENBDON_00928	1240349.ANGC01000011_gene290	3.73e-152	429.0	COG2203@1|root,COG2203@2|Bacteria,2HGVI@201174|Actinobacteria,4G1UR@85025|Nocardiaceae	201174|Actinobacteria	T	ANTAR	-	-	-	-	-	-	-	-	-	-	-	-	ANTAR,GAF_2
ENBDON_00929	1240349.ANGC01000011_gene291	0.0	1351.0	COG0171@1|root,COG0388@1|root,COG0171@2|Bacteria,COG0388@2|Bacteria,2GK2C@201174|Actinobacteria,4FYD3@85025|Nocardiaceae	201174|Actinobacteria	H	Catalyzes the ATP-dependent amidation of deamido-NAD to form NAD. Uses L-glutamine as a nitrogen source	nadE	-	6.3.5.1	ko:K01950	ko00760,ko01100,map00760,map01100	M00115	R00257	RC00010,RC00100	ko00000,ko00001,ko00002,ko01000	-	-	-	CN_hydrolase,NAD_synthase
ENBDON_00930	1240349.ANGC01000011_gene292	3.54e-285	781.0	COG1168@1|root,COG1168@2|Bacteria,2GJFQ@201174|Actinobacteria,4FUZH@85025|Nocardiaceae	201174|Actinobacteria	E	Aminotransferase class I and II	-	-	4.4.1.8	ko:K14155	ko00270,ko00450,ko01100,ko01110,ko01230,map00270,map00450,map01100,map01110,map01230	-	R00782,R01286,R02408,R04941	RC00056,RC00069,RC00382,RC00488,RC00710,RC01245,RC02303	ko00000,ko00001,ko01000,ko01007	-	-	-	Aminotran_1_2,DUF664
ENBDON_00931	1240349.ANGC01000011_gene293	6.92e-127	362.0	2AEJC@1|root,314EV@2|Bacteria,2GMTI@201174|Actinobacteria,4FTW3@85025|Nocardiaceae	201174|Actinobacteria	S	Mycothiol maleylpyruvate isomerase N-terminal domain	-	-	-	-	-	-	-	-	-	-	-	-	MDMPI_N
ENBDON_00932	1429046.RR21198_4528	0.0	1341.0	COG2909@1|root,COG2909@2|Bacteria,2GJXF@201174|Actinobacteria,4G9G7@85025|Nocardiaceae	201174|Actinobacteria	K	transcriptional regulator	-	-	-	-	-	-	-	-	-	-	-	-	AAA_16,GerE
ENBDON_00933	1429046.RR21198_3242	4.25e-271	744.0	COG2124@1|root,COG2124@2|Bacteria,2GKCG@201174|Actinobacteria,4FWXA@85025|Nocardiaceae	201174|Actinobacteria	Q	Cytochrome P450	-	-	1.14.15.14	ko:K20497	-	-	-	-	ko00000,ko00199,ko01000	-	-	-	p450
ENBDON_00934	37919.EP51_01400	7.44e-66	207.0	2B70J@1|root,32014@2|Bacteria,2HJDD@201174|Actinobacteria,4G6F6@85025|Nocardiaceae	201174|Actinobacteria	-	-	-	-	-	-	-	-	-	-	-	-	-	-	-
ENBDON_00936	1240349.ANGC01000011_gene294	9.53e-241	660.0	COG2141@1|root,COG2141@2|Bacteria,2GM94@201174|Actinobacteria,4FV22@85025|Nocardiaceae	201174|Actinobacteria	C	Luciferase-like monooxygenase	fgd_1	-	-	-	-	-	-	-	-	-	-	-	Bac_luciferase
ENBDON_00937	1240349.ANGC01000011_gene295	5.19e-67	204.0	2AQQ7@1|root,31FXT@2|Bacteria,2HJM0@201174|Actinobacteria,4G70M@85025|Nocardiaceae	201174|Actinobacteria	-	-	-	-	-	-	-	-	-	-	-	-	-	-	-
ENBDON_00938	1240349.ANGC01000011_gene296	3.07e-39	131.0	2AR42@1|root,31GDC@2|Bacteria,2HK32@201174|Actinobacteria,4G7TS@85025|Nocardiaceae	201174|Actinobacteria	-	-	-	-	-	-	-	-	-	-	-	-	-	-	-
ENBDON_00939	1429046.RR21198_4533	5.79e-225	622.0	COG0614@1|root,COG0614@2|Bacteria,2GKZJ@201174|Actinobacteria,4FXGI@85025|Nocardiaceae	201174|Actinobacteria	P	COG0614 ABC-type Fe3 -hydroxamate transport system, periplasmic component	-	-	-	ko:K02016	ko02010,map02010	M00240	-	-	ko00000,ko00001,ko00002,ko02000	3.A.1.14	-	-	Peripla_BP_2
ENBDON_00940	1240349.ANGC01000011_gene298	1.64e-229	636.0	COG0609@1|root,COG0609@2|Bacteria,2GK8Z@201174|Actinobacteria,4FUBI@85025|Nocardiaceae	201174|Actinobacteria	P	Belongs to the binding-protein-dependent transport system permease family. FecCD subfamily	-	-	-	ko:K02015	ko02010,map02010	M00240	-	-	ko00000,ko00001,ko00002,ko02000	3.A.1.14	-	-	FecCD
ENBDON_00941	1240349.ANGC01000011_gene299	3.18e-168	472.0	COG1120@1|root,COG1120@2|Bacteria,2GN5T@201174|Actinobacteria,4FZVM@85025|Nocardiaceae	201174|Actinobacteria	HP	COG1120 ABC-type cobalamin Fe3 -siderophores transport systems, ATPase components	-	-	3.6.3.34	ko:K02013	ko02010,map02010	M00240	-	-	ko00000,ko00001,ko00002,ko01000,ko02000	3.A.1.14	-	-	ABC_tran
ENBDON_00942	1240349.ANGC01000011_gene300	1.11e-164	463.0	COG4114@1|root,COG4114@2|Bacteria,2ISD4@201174|Actinobacteria,4FZ0B@85025|Nocardiaceae	201174|Actinobacteria	S	FhuF 2Fe-2S C-terminal domain	-	-	-	-	-	-	-	-	-	-	-	-	FhuF_C
ENBDON_00943	1240349.ANGC01000011_gene301	2.53e-78	234.0	COG3759@1|root,COG3759@2|Bacteria,2GVKG@201174|Actinobacteria,4G1WK@85025|Nocardiaceae	201174|Actinobacteria	S	Protein of unknown function (DUF1304)	-	-	-	ko:K08987	-	-	-	-	ko00000	-	-	-	DUF1304
ENBDON_00944	1240349.ANGC01000011_gene302	3.13e-88	261.0	COG1917@1|root,COG1917@2|Bacteria,2GVMS@201174|Actinobacteria,4G25T@85025|Nocardiaceae	201174|Actinobacteria	S	Cupin 2, conserved barrel domain protein	-	-	-	-	-	-	-	-	-	-	-	-	Cupin_2
ENBDON_00945	1240349.ANGC01000011_gene303	4.67e-238	656.0	COG2203@1|root,COG2771@1|root,COG2203@2|Bacteria,COG2771@2|Bacteria,2I47D@201174|Actinobacteria,4FYYI@85025|Nocardiaceae	201174|Actinobacteria	K	Domain present in phytochromes and cGMP-specific phosphodiesterases.	-	-	-	-	-	-	-	-	-	-	-	-	GerE
ENBDON_00946	1240349.ANGC01000011_gene304	6.86e-294	803.0	COG1680@1|root,COG1680@2|Bacteria,2GIX5@201174|Actinobacteria,4FZFF@85025|Nocardiaceae	201174|Actinobacteria	V	Beta-lactamase	lpqK	-	-	-	-	-	-	-	-	-	-	-	Beta-lactamase
ENBDON_00947	1240349.ANGC01000011_gene305	3.52e-173	483.0	COG1414@1|root,COG1414@2|Bacteria,2IS05@201174|Actinobacteria,4FYIK@85025|Nocardiaceae	201174|Actinobacteria	K	Bacterial transcriptional regulator	-	-	-	-	-	-	-	-	-	-	-	-	HTH_IclR,IclR
ENBDON_00948	1240349.ANGC01000011_gene306	0.0	875.0	COG0531@1|root,COG0531@2|Bacteria,2H3PV@201174|Actinobacteria,4FVT9@85025|Nocardiaceae	201174|Actinobacteria	E	amino acid	-	-	-	-	-	-	-	-	-	-	-	-	AA_permease,AA_permease_2
ENBDON_00949	1240349.ANGC01000011_gene307	1.59e-111	323.0	COG2259@1|root,COG2259@2|Bacteria,2ICCJ@201174|Actinobacteria,4G18Z@85025|Nocardiaceae	201174|Actinobacteria	S	Methylamine utilisation protein MauE	-	-	-	-	-	-	-	-	-	-	-	-	MauE
ENBDON_00950	1240349.ANGC01000011_gene308	4.61e-101	297.0	COG1225@1|root,COG1225@2|Bacteria,2H286@201174|Actinobacteria,4FY3C@85025|Nocardiaceae	201174|Actinobacteria	O	AhpC/TSA family	mauD	-	-	-	-	-	-	-	-	-	-	-	AhpC-TSA
ENBDON_00951	1240349.ANGC01000011_gene309	2.84e-169	471.0	28V8Y@1|root,2ZHBX@2|Bacteria,2H2X7@201174|Actinobacteria,4FX66@85025|Nocardiaceae	201174|Actinobacteria	C	Methylamine dehydrogenase, L chain	mauA	-	1.4.9.1	ko:K15228	ko00680,ko01120,map00680,map01120	-	R00606	RC00189	ko00000,ko00001,ko01000	-	-	-	Me-amine-dh_L
ENBDON_00952	1240349.ANGC01000011_gene310	1.76e-309	843.0	2B7AT@1|root,320DV@2|Bacteria,2H412@201174|Actinobacteria,4FXZ4@85025|Nocardiaceae	201174|Actinobacteria	-	-	-	-	-	-	-	-	-	-	-	-	-	-	-
ENBDON_00953	1240349.ANGC01000011_gene311	0.0	951.0	COG2132@1|root,COG2132@2|Bacteria,2GMJ4@201174|Actinobacteria,4FXKQ@85025|Nocardiaceae	201174|Actinobacteria	Q	Multicopper oxidase	-	-	-	-	-	-	-	-	-	-	-	-	Cu-oxidase,Cu-oxidase_2,Cu-oxidase_3
ENBDON_00954	1240349.ANGC01000011_gene312	1.59e-76	228.0	COG3794@1|root,COG3794@2|Bacteria,2GSBM@201174|Actinobacteria,4G2JT@85025|Nocardiaceae	201174|Actinobacteria	C	Copper binding proteins, plastocyanin/azurin family	-	-	-	-	-	-	-	-	-	-	-	-	Copper-bind,Cupredoxin_1
ENBDON_00955	1429046.RR21198_4549	2.12e-65	199.0	COG3794@1|root,COG3794@2|Bacteria,2H73G@201174|Actinobacteria,4G36P@85025|Nocardiaceae	201174|Actinobacteria	C	Copper binding proteins, plastocyanin/azurin family	-	-	-	-	-	-	-	-	-	-	-	-	Copper-bind,Cupredoxin_1
ENBDON_00956	1240349.ANGC01000011_gene314	1.97e-173	486.0	COG0785@1|root,COG0785@2|Bacteria,2H30N@201174|Actinobacteria,4FY0Y@85025|Nocardiaceae	201174|Actinobacteria	O	Cytochrome C biogenesis protein	-	-	-	-	-	-	-	-	-	-	-	-	-
ENBDON_00957	1240349.ANGC01000011_gene315	4.42e-116	332.0	COG0386@1|root,COG0386@2|Bacteria,2IFJH@201174|Actinobacteria,4G0RS@85025|Nocardiaceae	201174|Actinobacteria	O	Belongs to the glutathione peroxidase family	btuE	-	1.11.1.9	ko:K00432	ko00480,ko00590,ko04918,map00480,map00590,map04918	-	R00274,R07034,R07035	RC00011,RC00982	ko00000,ko00001,ko01000	-	-	-	GSHPx
ENBDON_00958	1240349.ANGC01000011_gene316	8.77e-158	442.0	COG0778@1|root,COG0778@2|Bacteria,2I2R7@201174|Actinobacteria,4FWAI@85025|Nocardiaceae	201174|Actinobacteria	C	Nitroreductase family	bluB	-	1.13.11.79	ko:K04719	ko00740,ko01100,map00740,map01100	-	R09083	RC00435,RC02413	ko00000,ko00001,ko01000	-	-	-	Nitroreductase
ENBDON_00959	1240349.ANGC01000011_gene317	4.65e-166	464.0	COG3233@1|root,COG3233@2|Bacteria,2HAXX@201174|Actinobacteria,4FUX9@85025|Nocardiaceae	201174|Actinobacteria	S	Uncharacterized protein conserved in bacteria (DUF2334)	-	-	-	ko:K06986	-	-	-	-	ko00000	-	-	-	DUF2334
ENBDON_00960	1240349.ANGC01000011_gene318	0.0	1087.0	COG3573@1|root,COG3573@2|Bacteria,2GIYM@201174|Actinobacteria,4FUN9@85025|Nocardiaceae	201174|Actinobacteria	S	FAD binding domain	-	GO:0003674,GO:0003824,GO:0005575,GO:0005623,GO:0005886,GO:0006629,GO:0006694,GO:0008150,GO:0008152,GO:0008202,GO:0008610,GO:0009058,GO:0016020,GO:0016229,GO:0016491,GO:0016627,GO:0033765,GO:0044238,GO:0044464,GO:0055114,GO:0071704,GO:0071944,GO:1901360,GO:1901362,GO:1901576	-	ko:K07077	-	-	-	-	ko00000	-	-	-	FAD_binding_2
ENBDON_00961	1240349.ANGC01000011_gene319	2.72e-155	435.0	COG2220@1|root,COG2220@2|Bacteria,2GNHK@201174|Actinobacteria,4FVSY@85025|Nocardiaceae	201174|Actinobacteria	S	Beta-lactamase superfamily domain	-	-	-	-	-	-	-	-	-	-	-	-	Lactamase_B_3
ENBDON_00962	1429046.RR21198_4556	8.96e-117	335.0	COG0716@1|root,COG0716@2|Bacteria,2IQZD@201174|Actinobacteria,4G1CN@85025|Nocardiaceae	201174|Actinobacteria	C	FMN binding	-	-	-	-	-	-	-	-	-	-	-	-	Flavodoxin_1,Flavodoxin_5
ENBDON_00963	1240349.ANGC01000011_gene321	0.0	950.0	COG2272@1|root,COG2272@2|Bacteria,2GJCN@201174|Actinobacteria,4FVZR@85025|Nocardiaceae	201174|Actinobacteria	I	Belongs to the type-B carboxylesterase lipase family	-	-	-	ko:K03929	-	-	-	-	ko00000,ko01000	-	CE10	-	COesterase
ENBDON_00964	1240349.ANGC01000011_gene322	5.36e-158	444.0	2BH7Q@1|root,32B8Z@2|Bacteria,2IBM4@201174|Actinobacteria,4G4A2@85025|Nocardiaceae	201174|Actinobacteria	-	-	-	-	-	-	-	-	-	-	-	-	-	-	-
ENBDON_00965	1240349.ANGC01000011_gene323	0.0	1337.0	COG2217@1|root,COG2217@2|Bacteria,2GIRF@201174|Actinobacteria,4FVQ3@85025|Nocardiaceae	201174|Actinobacteria	P	Heavy-metal-associated domain	copA	-	3.6.3.54	ko:K17686	ko01524,ko04016,map01524,map04016	-	R00086	RC00002	ko00000,ko00001,ko01000	3.A.3.5	-	-	E1-E2_ATPase,HMA,Hydrolase
ENBDON_00966	1240349.ANGC01000011_gene324	1.28e-65	199.0	COG2608@1|root,COG2608@2|Bacteria	2|Bacteria	P	mercury ion transmembrane transporter activity	-	-	-	-	-	-	-	-	-	-	-	-	HMA
ENBDON_00967	1240349.ANGC01000011_gene325	0.0	1392.0	COG0642@1|root,COG0745@1|root,COG0745@2|Bacteria,COG2205@2|Bacteria,2H3NJ@201174|Actinobacteria,4FYQ2@85025|Nocardiaceae	201174|Actinobacteria	T	His Kinase A (phosphoacceptor) domain	-	-	-	-	-	-	-	-	-	-	-	-	ANTAR,CheB_methylest,GAF_2,HATPase_c,HisKA,PAS,PAS_4,Response_reg
ENBDON_00968	1429046.RR21198_4562	8.15e-48	153.0	COG1828@1|root,COG1828@2|Bacteria,2GQV4@201174|Actinobacteria,4G2YH@85025|Nocardiaceae	201174|Actinobacteria	F	Part of the phosphoribosylformylglycinamidine synthase complex involved in the purines biosynthetic pathway. Catalyzes the ATP-dependent conversion of formylglycinamide ribonucleotide (FGAR) and glutamine to yield formylglycinamidine ribonucleotide (FGAM) and glutamate. The FGAM synthase complex is composed of three subunits. PurQ produces an ammonia molecule by converting glutamine to glutamate.…	purS	-	6.3.5.3	ko:K01952	ko00230,ko01100,ko01110,ko01130,map00230,map01100,map01110,map01130	M00048	R04463	RC00010,RC01160	ko00000,ko00001,ko00002,ko01000	-	-	-	PurS
ENBDON_00969	1240349.ANGC01000011_gene327	3.7e-163	456.0	COG0047@1|root,COG0047@2|Bacteria,2GMJY@201174|Actinobacteria,4FTYT@85025|Nocardiaceae	201174|Actinobacteria	F	Part of the phosphoribosylformylglycinamidine synthase complex involved in the purines biosynthetic pathway. Catalyzes the ATP-dependent conversion of formylglycinamide ribonucleotide (FGAR) and glutamine to yield formylglycinamidine ribonucleotide (FGAM) and glutamate. The FGAM synthase complex is composed of three subunits. PurQ produces an ammonia molecule by converting glutamine to glutamate.…	purQ	GO:0005575,GO:0005622,GO:0005623,GO:0005737,GO:0005886,GO:0008150,GO:0016020,GO:0040007,GO:0044424,GO:0044464,GO:0071944	6.3.5.3	ko:K01952	ko00230,ko01100,ko01110,ko01130,map00230,map01100,map01110,map01130	M00048	R04463	RC00010,RC01160	ko00000,ko00001,ko00002,ko01000	-	-	-	GATase_5
ENBDON_00970	1240349.ANGC01000011_gene328	7.17e-242	667.0	COG5002@1|root,COG5002@2|Bacteria,2GIX7@201174|Actinobacteria,4G094@85025|Nocardiaceae	201174|Actinobacteria	T	His Kinase A (phosphoacceptor) domain	-	-	-	-	-	-	-	-	-	-	-	-	HAMP,HATPase_c,HisKA
ENBDON_00971	1240349.ANGC01000011_gene329	2.74e-176	493.0	COG0745@1|root,COG0745@2|Bacteria,2GK5S@201174|Actinobacteria,4G8SS@85025|Nocardiaceae	201174|Actinobacteria	K	Transcriptional regulatory protein, C terminal	-	-	-	ko:K07776	ko02020,map02020	M00443	-	-	ko00000,ko00001,ko00002,ko02022	-	-	-	Response_reg,Trans_reg_C
ENBDON_00972	1429046.RR21198_4567	4.45e-42	138.0	COG3462@1|root,COG3462@2|Bacteria,2I22F@201174|Actinobacteria,4G7CE@85025|Nocardiaceae	201174|Actinobacteria	S	membrane protein (DUF2078)	-	-	-	ko:K08982	-	-	-	-	ko00000	-	-	-	-
ENBDON_00973	1429046.RR21198_4568	1.74e-129	369.0	COG3544@1|root,COG3544@2|Bacteria,2IKUE@201174|Actinobacteria,4G0K6@85025|Nocardiaceae	201174|Actinobacteria	S	Domain of unknown function (DUF4142)	-	-	-	-	-	-	-	-	-	-	-	-	DUF305
ENBDON_00974	1429046.RR21198_4569	0.0	1195.0	COG2217@1|root,COG2217@2|Bacteria,2GIRF@201174|Actinobacteria,4FUIM@85025|Nocardiaceae	201174|Actinobacteria	P	E1-E2 ATPase	copB	-	3.6.3.4,3.6.3.54	ko:K01533,ko:K17686	ko01524,ko04016,map01524,map04016	-	R00086	RC00002	ko00000,ko00001,ko01000	3.A.3.5	-	-	E1-E2_ATPase,Hydrolase
ENBDON_00975	1240349.ANGC01000011_gene333	2.78e-71	215.0	2B2ST@1|root,31VD4@2|Bacteria,2HDBU@201174|Actinobacteria,4G48D@85025|Nocardiaceae	201174|Actinobacteria	-	-	-	-	-	-	-	-	-	-	-	-	-	-	-
ENBDON_00976	1240349.ANGC01000011_gene334	2.61e-76	228.0	COG0346@1|root,COG0346@2|Bacteria,2IQJB@201174|Actinobacteria,4G2GA@85025|Nocardiaceae	201174|Actinobacteria	E	glyoxalase	-	-	-	-	-	-	-	-	-	-	-	-	Glyoxalase
ENBDON_00977	1240349.ANGC01000011_gene335	2.61e-254	699.0	COG1672@1|root,COG1672@2|Bacteria,2GWBV@201174|Actinobacteria	201174|Actinobacteria	S	AAA ATPase domain	-	-	-	-	-	-	-	-	-	-	-	-	AAA_16
ENBDON_00978	1240349.ANGC01000011_gene336	2.9e-312	850.0	COG1362@1|root,COG1362@2|Bacteria,2GKW4@201174|Actinobacteria,4FXFR@85025|Nocardiaceae	201174|Actinobacteria	E	M18 family aminopeptidase 2	apeB	GO:0003674,GO:0003824,GO:0004177,GO:0005575,GO:0005622,GO:0005623,GO:0005737,GO:0005829,GO:0005886,GO:0006508,GO:0006518,GO:0006807,GO:0008150,GO:0008152,GO:0008233,GO:0008235,GO:0008237,GO:0008238,GO:0009987,GO:0016020,GO:0016787,GO:0019538,GO:0034641,GO:0043170,GO:0043603,GO:0044237,GO:0044238,GO:0044424,GO:0044444,GO:0044464,GO:0070006,GO:0070011,GO:0071704,GO:0071944,GO:0140096,GO:1901564	3.4.11.21	ko:K01267	-	-	-	-	ko00000,ko01000,ko01002,ko04131	-	-	-	Peptidase_M18
ENBDON_00979	1240349.ANGC01000011_gene337	8.11e-138	390.0	COG4636@1|root,COG4636@2|Bacteria,2I17R@201174|Actinobacteria,4G1W0@85025|Nocardiaceae	201174|Actinobacteria	S	Putative restriction endonuclease	-	-	-	-	-	-	-	-	-	-	-	-	Uma2
ENBDON_00980	1240349.ANGC01000011_gene338	0.0	1484.0	COG0046@1|root,COG0046@2|Bacteria,2GKG6@201174|Actinobacteria,4FTVT@85025|Nocardiaceae	201174|Actinobacteria	F	Part of the phosphoribosylformylglycinamidine synthase complex involved in the purines biosynthetic pathway. Catalyzes the ATP-dependent conversion of formylglycinamide ribonucleotide (FGAR) and glutamine to yield formylglycinamidine ribonucleotide (FGAM) and glutamate. The FGAM synthase complex is composed of three subunits. PurQ produces an ammonia molecule by converting glutamine to glutamate.…	purL	GO:0006139,GO:0006163,GO:0006164,GO:0006725,GO:0006753,GO:0006793,GO:0006796,GO:0006807,GO:0008150,GO:0008152,GO:0009058,GO:0009117,GO:0009165,GO:0009987,GO:0018130,GO:0019438,GO:0019637,GO:0034641,GO:0034654,GO:0040007,GO:0044237,GO:0044238,GO:0044249,GO:0044271,GO:0044281,GO:0046483,GO:0055086,GO:0071704,GO:0072521,GO:0072522,GO:0090407,GO:1901293,GO:1901360,GO:1901362,GO:1901564,GO:1901566,GO:…	6.3.5.3	ko:K01952	ko00230,ko01100,ko01110,ko01130,map00230,map01100,map01110,map01130	M00048	R04463	RC00010,RC01160	ko00000,ko00001,ko00002,ko01000	-	-	-	AIRS,AIRS_C
ENBDON_00981	1240349.ANGC01000011_gene339	0.0	1158.0	COG4425@1|root,COG4425@2|Bacteria,2GKB5@201174|Actinobacteria,4FUWT@85025|Nocardiaceae	201174|Actinobacteria	S	Alpha/beta-hydrolase family N-terminus	-	-	-	-	-	-	-	-	-	-	-	-	Abhydrolase_9,Abhydrolase_9_N
ENBDON_00982	1240349.ANGC01000011_gene340	1.08e-147	417.0	COG1266@1|root,COG1266@2|Bacteria,2IFZG@201174|Actinobacteria,4G190@85025|Nocardiaceae	201174|Actinobacteria	S	CAAX protease self-immunity	-	-	-	ko:K07052	-	-	-	-	ko00000	-	-	-	Abi
ENBDON_00983	1240349.ANGC01000011_gene341	7.16e-82	243.0	COG3255@1|root,COG3255@2|Bacteria,2IQBF@201174|Actinobacteria,4G262@85025|Nocardiaceae	201174|Actinobacteria	I	Sterol carrier protein	-	-	-	-	-	-	-	-	-	-	-	-	MDMPI_C,MDMPI_N
ENBDON_00984	1429046.RR21198_4578	0.0	1040.0	COG0034@1|root,COG0034@2|Bacteria,2GK6I@201174|Actinobacteria,4FU3Z@85025|Nocardiaceae	201174|Actinobacteria	F	Catalyzes the formation of phosphoribosylamine from phosphoribosylpyrophosphate (PRPP) and glutamine	purF	GO:0008150,GO:0040007	2.4.2.14	ko:K00764	ko00230,ko00250,ko01100,ko01110,ko01130,map00230,map00250,map01100,map01110,map01130	M00048	R01072	RC00010,RC02724,RC02752	ko00000,ko00001,ko00002,ko01000,ko01002	-	-	-	GATase_6,GATase_7,Pribosyltran
ENBDON_00985	1429046.RR21198_4579	3.27e-255	700.0	COG0150@1|root,COG0150@2|Bacteria,2GJNY@201174|Actinobacteria,4FUGG@85025|Nocardiaceae	201174|Actinobacteria	F	Phosphoribosylformylglycinamidine cyclo-ligase	purM	GO:0003674,GO:0003824,GO:0004641,GO:0005575,GO:0005622,GO:0005623,GO:0005737,GO:0005829,GO:0016874,GO:0016879,GO:0016882,GO:0044424,GO:0044444,GO:0044464	6.3.3.1	ko:K01933	ko00230,ko01100,ko01110,ko01130,map00230,map01100,map01110,map01130	M00048	R04208	RC01100	ko00000,ko00001,ko00002,ko01000	-	-	-	AIRS,AIRS_C
ENBDON_00986	1240349.ANGC01000011_gene344	9.31e-44	142.0	2EGRW@1|root,33AI2@2|Bacteria,2IQF3@201174|Actinobacteria,4G42S@85025|Nocardiaceae	201174|Actinobacteria	S	Protein of unknown function (DUF3073)	-	-	-	-	-	-	-	-	-	-	-	-	DUF3073
ENBDON_00987	1429046.RR21198_4581	1.3e-217	602.0	COG4448@1|root,COG4448@2|Bacteria,2GJA7@201174|Actinobacteria,4FTYI@85025|Nocardiaceae	201174|Actinobacteria	E	L-asparaginase II	-	-	-	-	-	-	-	-	-	-	-	-	Asparaginase_II
ENBDON_00988	1240349.ANGC01000011_gene346	2.13e-144	408.0	COG2258@1|root,COG2258@2|Bacteria,2GMCN@201174|Actinobacteria,4FWI2@85025|Nocardiaceae	201174|Actinobacteria	S	MOSC domain	-	-	-	-	-	-	-	-	-	-	-	-	MOSC
ENBDON_00989	1240349.ANGC01000011_gene347	6.57e-270	738.0	COG0354@1|root,COG0354@2|Bacteria,2GKP0@201174|Actinobacteria,4FX58@85025|Nocardiaceae	201174|Actinobacteria	S	Belongs to the GcvT family	ygfZ	-	-	ko:K06980	-	-	-	-	ko00000,ko03016	-	-	-	GCV_T,GCV_T_C
ENBDON_00990	1240349.ANGC01000011_gene348	1.89e-193	537.0	COG0115@1|root,COG0115@2|Bacteria,2GN5Z@201174|Actinobacteria,4FUQN@85025|Nocardiaceae	201174|Actinobacteria	EH	Amino-transferase class IV	pabC	-	4.1.3.38	ko:K02619	ko00790,map00790	-	R05553	RC01843,RC02148	ko00000,ko00001,ko01000	-	-	-	Aminotran_4
ENBDON_00991	1240349.ANGC01000011_gene349	0.0	1004.0	COG1271@1|root,COG1271@2|Bacteria,2GJE4@201174|Actinobacteria,4FU4T@85025|Nocardiaceae	201174|Actinobacteria	C	Cytochrome bd ubiquinol oxidase subunit I	cydA	-	1.10.3.14	ko:K00425	ko00190,ko01100,ko02020,map00190,map01100,map02020	M00153	R11325	RC00061	ko00000,ko00001,ko00002,ko01000	3.D.4.3	-	-	Cyt_bd_oxida_I
ENBDON_00992	1240349.ANGC01000011_gene350	3.47e-244	671.0	COG1294@1|root,COG1294@2|Bacteria,2GMFV@201174|Actinobacteria,4FUXR@85025|Nocardiaceae	201174|Actinobacteria	C	Cytochrome bd terminal oxidase subunit II	cydB	-	1.10.3.14	ko:K00426	ko00190,ko01100,ko02020,map00190,map01100,map02020	M00153	R11325	RC00061	ko00000,ko00001,ko00002,ko01000	3.D.4.3	-	-	Cyt_bd_oxida_II
ENBDON_00993	1240349.ANGC01000011_gene351	0.0	966.0	COG4988@1|root,COG4988@2|Bacteria,2I2DP@201174|Actinobacteria,4FW4J@85025|Nocardiaceae	201174|Actinobacteria	V	ABC transporter transmembrane region	cydD	-	-	ko:K16013	ko02010,map02010	-	-	-	ko00000,ko00001,ko02000	3.A.1.129	-	-	ABC_membrane,ABC_tran
ENBDON_00994	1435356.Y013_19960	8.43e-260	728.0	COG4987@1|root,COG4987@2|Bacteria,2H79B@201174|Actinobacteria,4FVKK@85025|Nocardiaceae	201174|Actinobacteria	CO	ATPases associated with a variety of cellular activities	cydC	-	-	ko:K06148,ko:K16012	ko02010,map02010	-	-	-	ko00000,ko00001,ko02000	3.A.1,3.A.1.129	-	-	ABC_membrane,ABC_tran
ENBDON_00996	1240349.ANGC01000016_gene809	0.0	1059.0	COG1292@1|root,COG1292@2|Bacteria,2GJX0@201174|Actinobacteria,4FXB5@85025|Nocardiaceae	201174|Actinobacteria	U	BCCT, betaine/carnitine/choline family transporter	-	-	-	-	-	-	-	-	-	-	-	-	BCCT
ENBDON_00997	1240349.ANGC01000016_gene808	8.39e-159	445.0	COG4044@1|root,COG4044@2|Bacteria,2GKGF@201174|Actinobacteria,4FWWZ@85025|Nocardiaceae	201174|Actinobacteria	S	May play a role in the intracellular transport of hydrophobic ligands	-	GO:0005575,GO:0005623,GO:0005886,GO:0016020,GO:0044464,GO:0071944	-	-	-	-	-	-	-	-	-	-	DUF1794
ENBDON_00999	1240349.ANGC01000016_gene806	5.2e-293	800.0	2F0MG@1|root,33S0N@2|Bacteria,2H35G@201174|Actinobacteria,4FVWG@85025|Nocardiaceae	201174|Actinobacteria	S	Cutinase	-	-	-	-	-	-	-	-	-	-	-	-	Cutinase
ENBDON_01000	1240349.ANGC01000016_gene805	1.02e-66	202.0	2E36U@1|root,32Y6I@2|Bacteria,2IM2G@201174|Actinobacteria,4G21T@85025|Nocardiaceae	201174|Actinobacteria	S	Protein of unknown function (DUF1416)	sseC	GO:0005575,GO:0005618,GO:0005623,GO:0005886,GO:0016020,GO:0030312,GO:0044464,GO:0071944	-	-	-	-	-	-	-	-	-	-	DUF1416
ENBDON_01001	1429046.RR21198_5598	3.89e-205	566.0	COG2897@1|root,COG2897@2|Bacteria,2GIYU@201174|Actinobacteria,4FVRF@85025|Nocardiaceae	201174|Actinobacteria	P	Rhodanese Homology Domain	cysA2	GO:0005575,GO:0005618,GO:0005622,GO:0005623,GO:0005737,GO:0005829,GO:0005886,GO:0016020,GO:0030312,GO:0044424,GO:0044444,GO:0044464,GO:0071944	2.8.1.1,2.8.1.2	ko:K01011	ko00270,ko00920,ko01100,ko01120,ko04122,map00270,map00920,map01100,map01120,map04122	-	R01931,R03105,R03106	RC00214	ko00000,ko00001,ko01000	-	-	-	Rhodanese
ENBDON_01002	1240349.ANGC01000016_gene803	1.1e-85	254.0	2AN8T@1|root,31D6V@2|Bacteria,2IHRU@201174|Actinobacteria,4G1E1@85025|Nocardiaceae	201174|Actinobacteria	S	Domain of unknown function (DUF4395)	-	-	-	-	-	-	-	-	-	-	-	-	DUF4395
ENBDON_01003	1240349.ANGC01000016_gene802	1.86e-85	254.0	COG0526@1|root,COG0526@2|Bacteria,2IKMI@201174|Actinobacteria,4G2BC@85025|Nocardiaceae	201174|Actinobacteria	CO	Thioredoxin	thiX	-	-	-	-	-	-	-	-	-	-	-	Thioredoxin
ENBDON_01004	1240349.ANGC01000016_gene801	7.7e-173	484.0	2DR5D@1|root,33A8R@2|Bacteria,2H3Y4@201174|Actinobacteria,4FX2Z@85025|Nocardiaceae	201174|Actinobacteria	S	Protein of unknown function (DUF2993)	-	-	-	-	-	-	-	-	-	-	-	-	DUF2993
ENBDON_01005	1240349.ANGC01000016_gene800	6.79e-163	457.0	COG0745@1|root,COG0745@2|Bacteria,2GJGU@201174|Actinobacteria,4FVYH@85025|Nocardiaceae	201174|Actinobacteria	KT	Transcriptional regulatory protein, C terminal	glnR	-	-	-	-	-	-	-	-	-	-	-	Trans_reg_C
ENBDON_01006	1240349.ANGC01000016_gene799	2e-208	577.0	COG0454@1|root,COG0456@2|Bacteria,2GM35@201174|Actinobacteria,4FUA9@85025|Nocardiaceae	201174|Actinobacteria	K	Catalyzes the transfer of acetyl from acetyl-CoA to desacetylmycothiol (Cys-GlcN-Ins) to form mycothiol	mshD	GO:0000302,GO:0003674,GO:0003824,GO:0005575,GO:0005622,GO:0005623,GO:0005737,GO:0005829,GO:0006790,GO:0006950,GO:0006979,GO:0008080,GO:0008150,GO:0008152,GO:0009058,GO:0009268,GO:0009628,GO:0009636,GO:0009987,GO:0010035,GO:0010125,GO:0010126,GO:0010447,GO:0016137,GO:0016138,GO:0016407,GO:0016410,GO:0016740,GO:0016746,GO:0016747,GO:0033554,GO:0034599,GO:0034614,GO:0035447,GO:0035690,GO:0040007,GO:…	2.3.1.189	ko:K15520	-	-	-	-	ko00000,ko01000	-	-	-	Acetyltransf_1
ENBDON_01007	1240349.ANGC01000016_gene798	5.34e-248	683.0	COG0226@1|root,COG0226@2|Bacteria,2GJXD@201174|Actinobacteria,4FUG1@85025|Nocardiaceae	201174|Actinobacteria	P	Part of the ABC transporter complex PstSACB involved in phosphate import	pstS	-	-	ko:K02040	ko02010,ko02020,ko05152,map02010,map02020,map05152	M00222	-	-	ko00000,ko00001,ko00002,ko02000	3.A.1.7	-	-	PBP_like_2
ENBDON_01008	1240349.ANGC01000016_gene797	4e-237	654.0	COG0573@1|root,COG0573@2|Bacteria,2GJDA@201174|Actinobacteria,4FU4F@85025|Nocardiaceae	201174|Actinobacteria	P	probably responsible for the translocation of the substrate across the membrane	pstC	-	-	ko:K02037	ko02010,map02010	M00222	-	-	ko00000,ko00001,ko00002,ko02000	3.A.1.7	-	-	BPD_transp_1
ENBDON_01009	1240349.ANGC01000016_gene796	4.95e-195	543.0	COG0581@1|root,COG0581@2|Bacteria,2I2F2@201174|Actinobacteria,4FVA2@85025|Nocardiaceae	201174|Actinobacteria	P	Phosphate transport system permease	pstA	GO:0008150,GO:0040007,GO:0044110,GO:0044116,GO:0044117,GO:0044403,GO:0044419,GO:0051704	-	ko:K02038	ko02010,map02010	M00222	-	-	ko00000,ko00001,ko00002,ko02000	3.A.1.7	-	-	BPD_transp_1
ENBDON_01010	1240349.ANGC01000016_gene795	2.6e-184	512.0	COG1117@1|root,COG1117@2|Bacteria,2GJQ3@201174|Actinobacteria,4FVNV@85025|Nocardiaceae	201174|Actinobacteria	P	Part of the ABC transporter complex PstSACB involved in phosphate import. Responsible for energy coupling to the transport system	pstB	GO:0008150,GO:0040007,GO:0044110,GO:0044116,GO:0044117,GO:0044403,GO:0044419,GO:0051704	3.6.3.27	ko:K02036	ko02010,map02010	M00222	-	-	ko00000,ko00001,ko00002,ko01000,ko02000	3.A.1.7	-	-	ABC_tran
ENBDON_01011	1240349.ANGC01000016_gene794	1.88e-161	452.0	COG0704@1|root,COG0704@2|Bacteria,2GKAD@201174|Actinobacteria,4FVM2@85025|Nocardiaceae	201174|Actinobacteria	P	Plays a role in the regulation of phosphate uptake	phoU	GO:0003674,GO:0005488,GO:0005515,GO:0005575,GO:0005622,GO:0005623,GO:0005737,GO:0005829,GO:0005886,GO:0008150,GO:0009892,GO:0010563,GO:0010966,GO:0016020,GO:0019220,GO:0019222,GO:0022611,GO:0031323,GO:0031324,GO:0032502,GO:0032879,GO:0034762,GO:0034763,GO:0034765,GO:0034766,GO:0042221,GO:0042802,GO:0042803,GO:0043269,GO:0043271,GO:0044070,GO:0044424,GO:0044444,GO:0044464,GO:0045936,GO:0046677,GO:…	-	ko:K02039	-	-	-	-	ko00000	-	-	-	PhoU
ENBDON_01012	1240349.ANGC01000016_gene793	0.0	1065.0	COG1316@1|root,COG1316@2|Bacteria,2GJM3@201174|Actinobacteria,4FUNR@85025|Nocardiaceae	201174|Actinobacteria	K	Cell envelope-related transcriptional attenuator domain	-	-	-	-	-	-	-	-	-	-	-	-	LytR_C,LytR_cpsA_psr
ENBDON_01013	1240349.ANGC01000016_gene792	1.62e-278	761.0	COG0042@1|root,COG0042@2|Bacteria,2GJ8I@201174|Actinobacteria,4FUMS@85025|Nocardiaceae	201174|Actinobacteria	J	Catalyzes the synthesis of 5,6-dihydrouridine (D), a modified base found in the D-loop of most tRNAs, via the reduction of the C5-C6 double bond in target uridines	dus	GO:0008150,GO:0010565,GO:0019216,GO:0019217,GO:0019222,GO:0031323,GO:0050789,GO:0050794,GO:0062012,GO:0065007,GO:0080090	-	-	-	-	-	-	-	-	-	-	Dus
ENBDON_01014	1429046.RR21198_5611	1.56e-231	637.0	COG0208@1|root,COG0208@2|Bacteria,2GKGZ@201174|Actinobacteria,4FVHN@85025|Nocardiaceae	201174|Actinobacteria	F	Fatty acid desaturase	-	-	1.14.19.11,1.14.19.2,1.14.19.26	ko:K03921	ko00061,ko01040,ko01212,map00061,map01040,map01212	-	R03370,R08161,R11108,R11109	RC00917	ko00000,ko00001,ko01000,ko01004	-	-	-	FA_desaturase_2
ENBDON_01016	1240349.ANGC01000016_gene790	1.18e-84	255.0	COG5403@1|root,COG5403@2|Bacteria,2IKKK@201174|Actinobacteria,4G0RZ@85025|Nocardiaceae	201174|Actinobacteria	S	Bacterial protein of unknown function (DUF937)	-	-	-	-	-	-	-	-	-	-	-	-	DUF937
ENBDON_01017	1240349.ANGC01000016_gene789	1.64e-87	258.0	2API3@1|root,31EM3@2|Bacteria,2H6IN@201174|Actinobacteria,4G2F9@85025|Nocardiaceae	201174|Actinobacteria	-	-	-	-	-	-	-	-	-	-	-	-	-	-	-
ENBDON_01018	1240349.ANGC01000016_gene788	8.79e-123	351.0	2E5CQ@1|root,3304T@2|Bacteria,2IS2X@201174|Actinobacteria,4G19Z@85025|Nocardiaceae	201174|Actinobacteria	-	-	-	-	-	-	-	-	-	-	-	-	-	-	-
ENBDON_01020	1240349.ANGC01000016_gene787	2.68e-143	405.0	COG1309@1|root,COG1309@2|Bacteria,2INNB@201174|Actinobacteria,4FWKR@85025|Nocardiaceae	201174|Actinobacteria	K	Transcriptional regulator	-	-	-	-	-	-	-	-	-	-	-	-	TetR_N
ENBDON_01025	1429046.RR21198_3258	1.42e-270	743.0	COG0438@1|root,COG0438@2|Bacteria,2GMXE@201174|Actinobacteria,4FW6H@85025|Nocardiaceae	201174|Actinobacteria	M	Glycosyl transferases group 1	-	-	-	-	-	-	-	-	-	-	-	-	Glyco_trans_1_4,Glyco_trans_4_4,Glyco_transf_4,Glycos_transf_1
ENBDON_01026	1240349.ANGC01000016_gene783	6.9e-177	492.0	COG0500@1|root,COG2226@2|Bacteria,2H38T@201174|Actinobacteria,4FXIS@85025|Nocardiaceae	201174|Actinobacteria	Q	ubiE/COQ5 methyltransferase family	-	-	-	-	-	-	-	-	-	-	-	-	Methyltransf_11
ENBDON_01027	1240349.ANGC01000016_gene782	3.19e-264	722.0	COG3387@1|root,COG3387@2|Bacteria,2GKU7@201174|Actinobacteria,4FUBP@85025|Nocardiaceae	201174|Actinobacteria	G	PFAM Glycoside hydrolase 15-related	-	-	-	-	-	-	-	-	-	-	-	-	Prenyltrans
ENBDON_01028	1240349.ANGC01000016_gene781	1.08e-159	447.0	COG4122@1|root,COG4122@2|Bacteria,2GQ0Z@201174|Actinobacteria,4FY3U@85025|Nocardiaceae	201174|Actinobacteria	S	Methyltransferase domain	-	-	-	-	-	-	-	-	-	-	-	-	Methyltransf_24
ENBDON_01029	1240349.ANGC01000016_gene780	3.83e-160	451.0	COG1028@1|root,COG1028@2|Bacteria,2HRAZ@201174|Actinobacteria,4FY4D@85025|Nocardiaceae	201174|Actinobacteria	IQ	Enoyl-(Acyl carrier protein) reductase	-	-	-	-	-	-	-	-	-	-	-	-	adh_short_C2
ENBDON_01030	1429046.RR21198_3263	1.04e-82	244.0	COG0599@1|root,COG0599@2|Bacteria,2IFMB@201174|Actinobacteria,4G1UZ@85025|Nocardiaceae	201174|Actinobacteria	S	Carboxymuconolactone decarboxylase family	-	-	4.1.1.44	ko:K01607	ko00362,ko01100,ko01120,ko01220,map00362,map01100,map01120,map01220	-	R03470	RC00938	ko00000,ko00001,ko01000	-	-	-	CMD
ENBDON_01031	1240349.ANGC01000016_gene778	4.73e-186	519.0	COG2084@1|root,COG2084@2|Bacteria,2GNI7@201174|Actinobacteria,4FVG5@85025|Nocardiaceae	201174|Actinobacteria	I	NAD-binding of NADP-dependent 3-hydroxyisobutyrate dehydrogenase	-	-	1.1.1.31,1.1.1.60	ko:K00020,ko:K00042	ko00280,ko00630,ko01100,map00280,map00630,map01100	-	R01745,R01747,R05066	RC00099	ko00000,ko00001,ko01000	-	-	-	NAD_binding_11,NAD_binding_2
ENBDON_01032	1240349.ANGC01000016_gene777	3.55e-159	448.0	COG1028@1|root,COG1028@2|Bacteria,2HP88@201174|Actinobacteria,4FUDK@85025|Nocardiaceae	201174|Actinobacteria	IQ	KR domain	-	GO:0005575,GO:0005623,GO:0005886,GO:0016020,GO:0044464,GO:0071944	1.1.1.100	ko:K00059	ko00061,ko00333,ko00780,ko01040,ko01100,ko01130,ko01212,map00061,map00333,map00780,map01040,map01100,map01130,map01212	M00083,M00572	R04533,R04534,R04536,R04543,R04566,R04953,R04964,R07759,R07763,R10116,R10120,R11671	RC00029,RC00117	ko00000,ko00001,ko00002,ko01000,ko01004	-	-	-	adh_short_C2
ENBDON_01033	1240349.ANGC01000016_gene776	0.0	943.0	COG1012@1|root,COG1012@2|Bacteria,2GIWZ@201174|Actinobacteria,4FXCV@85025|Nocardiaceae	201174|Actinobacteria	C	Belongs to the aldehyde dehydrogenase family	aldA	GO:0000166,GO:0003674,GO:0003824,GO:0004029,GO:0004030,GO:0005488,GO:0005575,GO:0005622,GO:0005623,GO:0005737,GO:0005739,GO:0005759,GO:0005975,GO:0006066,GO:0006067,GO:0006069,GO:0006091,GO:0008150,GO:0008152,GO:0009055,GO:0009987,GO:0016491,GO:0016620,GO:0016903,GO:0016999,GO:0017144,GO:0022900,GO:0031974,GO:0034308,GO:0036094,GO:0043226,GO:0043227,GO:0043229,GO:0043231,GO:0043233,GO:0044237,GO:…	1.2.1.3	ko:K00128	ko00010,ko00053,ko00071,ko00280,ko00310,ko00330,ko00340,ko00380,ko00410,ko00561,ko00620,ko00625,ko00903,ko00981,ko01100,ko01110,ko01120,ko01130,map00010,map00053,map00071,map00280,map00310,map00330,map00340,map00380,map00410,map00561,map00620,map00625,map00903,map00981,map01100,map01110,map01120,map01130	M00135	R00264,R00631,R00710,R00904,R01752,R01986,R02549,R02678,R02940,R02957,R03283,R03869,R04065,R04506,R04903,R05050,R05237,R05238,R05286,R06366,R08146	RC00047,RC00071,RC00080,RC00186,RC00218,RC00242,RC00816,RC01500	ko00000,ko00001,ko00002,ko01000	-	-	-	Aldedh
ENBDON_01034	1429046.RR21198_3321	6.24e-114	329.0	COG1309@1|root,COG1309@2|Bacteria,2INCN@201174|Actinobacteria,4G0IP@85025|Nocardiaceae	201174|Actinobacteria	K	WHG domain	-	-	-	-	-	-	-	-	-	-	-	-	TetR_N,WHG
ENBDON_01035	1429046.RR21198_3322	8.8e-283	774.0	COG2124@1|root,COG2124@2|Bacteria,2GKCG@201174|Actinobacteria,4FZ1Q@85025|Nocardiaceae	201174|Actinobacteria	C	Belongs to the cytochrome P450 family	-	-	1.14.13.141	ko:K15981	ko00984,ko01120,map00984,map01120	-	R09859,R11357	RC01216,RC03368	ko00000,ko00001,ko00199,ko01000	-	-	-	p450
ENBDON_01036	1429046.RR21198_3323	3.06e-124	355.0	COG1309@1|root,COG1309@2|Bacteria,2I9ZN@201174|Actinobacteria,4FVH0@85025|Nocardiaceae	201174|Actinobacteria	K	Bacterial regulatory proteins, tetR family	-	-	-	-	-	-	-	-	-	-	-	-	TetR_N
ENBDON_01037	1240349.ANGC01000016_gene772	4.75e-269	739.0	COG2124@1|root,COG2124@2|Bacteria,2GJ8V@201174|Actinobacteria,4FW9P@85025|Nocardiaceae	201174|Actinobacteria	Q	Cytochrome P450	cyp123A3	GO:0003674,GO:0003824,GO:0004497,GO:0005575,GO:0005623,GO:0005886,GO:0006066,GO:0006629,GO:0006706,GO:0006707,GO:0008150,GO:0008152,GO:0008202,GO:0008203,GO:0008395,GO:0009056,GO:0016020,GO:0016042,GO:0016125,GO:0016127,GO:0016491,GO:0016705,GO:0016709,GO:0036199,GO:0044238,GO:0044281,GO:0044282,GO:0044464,GO:0046164,GO:0055114,GO:0071704,GO:0071944,GO:1901360,GO:1901361,GO:1901575,GO:1901615,GO:…	-	-	-	-	-	-	-	-	-	-	p450
ENBDON_01038	1240349.ANGC01000016_gene771	8.56e-178	496.0	COG4221@1|root,COG4221@2|Bacteria,2I8VU@201174|Actinobacteria,4FVKU@85025|Nocardiaceae	201174|Actinobacteria	S	KR domain	-	-	-	-	-	-	-	-	-	-	-	-	adh_short
ENBDON_01039	1240349.ANGC01000016_gene770	0.0	885.0	COG2124@1|root,COG2124@2|Bacteria,2GK4Z@201174|Actinobacteria,4FUVB@85025|Nocardiaceae	201174|Actinobacteria	Q	cytochrome P450	cyp51	GO:0003674,GO:0003824,GO:0004497,GO:0005488,GO:0005575,GO:0005622,GO:0005623,GO:0005737,GO:0005829,GO:0006629,GO:0008150,GO:0008152,GO:0008202,GO:0008398,GO:0016125,GO:0016491,GO:0016705,GO:0016709,GO:0020037,GO:0032451,GO:0044238,GO:0044424,GO:0044444,GO:0044464,GO:0046906,GO:0048037,GO:0055114,GO:0070988,GO:0071704,GO:0097159,GO:1901360,GO:1901363,GO:1901615	1.14.13.70	ko:K05917	ko00100,ko01100,ko01110,ko01130,map00100,map01100,map01110,map01130	M00101	R05640,R05731	RC01442	ko00000,ko00001,ko00002,ko00199,ko01000	-	-	-	p450
ENBDON_01040	1429046.RR21198_3327	6.99e-35	120.0	COG1141@1|root,COG1141@2|Bacteria,2GS47@201174|Actinobacteria,4G3V5@85025|Nocardiaceae	201174|Actinobacteria	C	Divergent 4Fe-4S mono-cluster	-	-	-	-	-	-	-	-	-	-	-	-	Fer4_13,Fer4_15
ENBDON_01041	1240349.ANGC01000016_gene768	1.39e-135	383.0	28NTV@1|root,2ZBSB@2|Bacteria,2GS03@201174|Actinobacteria,4FUR6@85025|Nocardiaceae	201174|Actinobacteria	-	-	-	-	-	-	-	-	-	-	-	-	-	-	-
ENBDON_01042	1240349.ANGC01000016_gene767	7.16e-297	810.0	28KAT@1|root,2Z9XX@2|Bacteria,2GNVW@201174|Actinobacteria,4FUSP@85025|Nocardiaceae	201174|Actinobacteria	-	-	-	-	-	-	-	-	-	-	-	-	-	-	-
ENBDON_01043	1240349.ANGC01000016_gene766	0.0	956.0	COG1053@1|root,COG1053@2|Bacteria,2GKS3@201174|Actinobacteria,4FUFM@85025|Nocardiaceae	201174|Actinobacteria	C	FAD binding domain	-	-	1.3.99.5	ko:K16051	ko00984,ko01120,map00984,map01120	-	R01834	RC00145	ko00000,ko00001,ko01000	-	-	-	FAD_binding_2
ENBDON_01044	1240349.ANGC01000016_gene765	4.21e-207	572.0	COG2141@1|root,COG2141@2|Bacteria,2GMMJ@201174|Actinobacteria,4FVVA@85025|Nocardiaceae	201174|Actinobacteria	C	Luciferase-like monooxygenase	rutA_3	-	-	-	-	-	-	-	-	-	-	-	Bac_luciferase
ENBDON_01045	1429046.RR21198_3333	7.06e-138	391.0	COG1309@1|root,COG1309@2|Bacteria,2GMPD@201174|Actinobacteria,4G10V@85025|Nocardiaceae	201174|Actinobacteria	K	Transcriptional regulator	-	-	-	ko:K22107	-	-	-	-	ko00000,ko03000	-	-	-	TetR_N
ENBDON_01046	1240349.ANGC01000016_gene763	1.24e-174	489.0	2CDJB@1|root,33T5F@2|Bacteria,2H5A9@201174|Actinobacteria,4FXMB@85025|Nocardiaceae	201174|Actinobacteria	-	-	-	-	-	-	-	-	-	-	-	-	-	-	-
ENBDON_01048	1429046.RR21198_3336	0.0	951.0	COG0733@1|root,COG0733@2|Bacteria,2GIU3@201174|Actinobacteria,4FY13@85025|Nocardiaceae	201174|Actinobacteria	U	Belongs to the sodium neurotransmitter symporter (SNF) (TC 2.A.22) family	metP	-	-	ko:K03308	-	-	-	-	ko00000	2.A.22.4,2.A.22.5	-	-	SNF
ENBDON_01049	1240349.ANGC01000016_gene760	2.78e-220	613.0	COG0392@1|root,COG0392@2|Bacteria,2HHTC@201174|Actinobacteria,4G0CC@85025|Nocardiaceae	201174|Actinobacteria	S	Lysylphosphatidylglycerol synthase TM region	-	-	-	ko:K20468	-	-	-	-	ko00000,ko02000	4.D.2.4.1	-	-	LPG_synthase_TM
ENBDON_01050	1240349.ANGC01000016_gene759	0.0	932.0	COG0204@1|root,COG0560@1|root,COG0204@2|Bacteria,COG0560@2|Bacteria,2GJVX@201174|Actinobacteria,4FUIH@85025|Nocardiaceae	201174|Actinobacteria	EI	Phosphate acyltransferases	plsC	-	2.3.1.51,3.1.3.3	ko:K00655,ko:K15781	ko00561,ko00564,ko01100,ko01110,map00561,map00564,map01100,map01110	M00089	R02241,R09381	RC00004,RC00037,RC00039	ko00000,ko00001,ko00002,ko01000,ko01004	-	-	-	Acyltransferase,HAD
ENBDON_01051	1240349.ANGC01000016_gene758	0.0	1470.0	COG2937@1|root,COG2937@2|Bacteria,2GMQF@201174|Actinobacteria,4FWRE@85025|Nocardiaceae	201174|Actinobacteria	I	Belongs to the GPAT DAPAT family	plsB	GO:0005575,GO:0005623,GO:0005886,GO:0016020,GO:0044464,GO:0071944	2.3.1.15	ko:K00631	ko00561,ko00564,ko01100,ko01110,map00561,map00564,map01100,map01110	M00089	R00851,R09380	RC00004,RC00039,RC00041	ko00000,ko00001,ko00002,ko01000,ko01004	-	-	-	Acyltransferase
ENBDON_01052	1240349.ANGC01000016_gene757	0.0	929.0	COG0645@1|root,COG2187@1|root,COG0645@2|Bacteria,COG2187@2|Bacteria,2GM3U@201174|Actinobacteria,4FU2A@85025|Nocardiaceae	201174|Actinobacteria	S	AAA domain	-	GO:0003674,GO:0005488,GO:0005575,GO:0005618,GO:0005623,GO:0008150,GO:0009987,GO:0030312,GO:0044464,GO:0044764,GO:0046812,GO:0051704,GO:0071944	-	ko:K07028	-	-	-	-	ko00000	-	-	-	AAA_33,APH
ENBDON_01053	1240349.ANGC01000016_gene756	1.63e-149	423.0	COG1814@1|root,COG1814@2|Bacteria,2GIZ3@201174|Actinobacteria,4FW5U@85025|Nocardiaceae	201174|Actinobacteria	S	VIT family	pcl	-	-	-	-	-	-	-	-	-	-	-	VIT1
ENBDON_01054	1429046.RR21198_3342	1.82e-199	554.0	COG0589@1|root,COG0589@2|Bacteria,2GMFE@201174|Actinobacteria,4FX52@85025|Nocardiaceae	201174|Actinobacteria	T	Belongs to the universal stress protein A family	-	-	-	-	-	-	-	-	-	-	-	-	Usp
ENBDON_01055	1240349.ANGC01000016_gene754	6.46e-236	649.0	COG1064@1|root,COG1064@2|Bacteria,2GNVQ@201174|Actinobacteria,4FU7S@85025|Nocardiaceae	201174|Actinobacteria	S	Alcohol dehydrogenase GroES-like domain	adhA	-	1.1.1.1	ko:K13953	ko00010,ko00071,ko00350,ko00625,ko00626,ko00830,ko00980,ko00982,ko01100,ko01110,ko01120,ko01130,ko01220,map00010,map00071,map00350,map00625,map00626,map00830,map00980,map00982,map01100,map01110,map01120,map01130,map01220	-	R00623,R00754,R02124,R04880,R05233,R05234,R06917,R06927,R07105,R08281,R08306,R08310	RC00050,RC00087,RC00088,RC00099,RC00116,RC00649,RC01734,RC02273	ko00000,ko00001,ko01000	-	-	-	ADH_N,ADH_zinc_N
ENBDON_01056	1240349.ANGC01000016_gene753	0.0	923.0	COG5607@1|root,COG5607@2|Bacteria,2GJZH@201174|Actinobacteria,4FWMS@85025|Nocardiaceae	201174|Actinobacteria	S	CHAD	-	-	-	-	-	-	-	-	-	-	-	-	CHAD,CYTH
ENBDON_01057	1429046.RR21198_3345	6.11e-118	338.0	COG4635@1|root,COG4635@2|Bacteria,2IQCQ@201174|Actinobacteria,4G90J@85025|Nocardiaceae	201174|Actinobacteria	CH	Flavodoxin domain	-	-	1.3.5.3	ko:K00230	ko00860,ko01100,ko01110,map00860,map01100,map01110	M00121	R09489	RC00885	ko00000,ko00001,ko00002,ko01000	-	-	-	Flavodoxin_5
ENBDON_01058	1240349.ANGC01000016_gene751	8.34e-231	636.0	COG0778@1|root,COG0778@2|Bacteria,2I8P3@201174|Actinobacteria,4G9C3@85025|Nocardiaceae	201174|Actinobacteria	C	Nitroreductase	-	-	-	-	-	-	-	-	-	-	-	-	Nitroreductase
ENBDON_01059	1240349.ANGC01000016_gene750	1.08e-127	362.0	COG3832@1|root,COG3832@2|Bacteria,2IQT7@201174|Actinobacteria,4G11K@85025|Nocardiaceae	201174|Actinobacteria	S	Activator of Hsp90 ATPase homolog 1-like protein	-	-	-	-	-	-	-	-	-	-	-	-	AHSA1
ENBDON_01060	1240349.ANGC01000016_gene749	1.08e-216	598.0	COG0564@1|root,COG0564@2|Bacteria,2GJ2Z@201174|Actinobacteria,4FW1J@85025|Nocardiaceae	201174|Actinobacteria	J	Pseudouridine synthase	rluA	-	5.4.99.28,5.4.99.29	ko:K06177	-	-	-	-	ko00000,ko01000,ko03009,ko03016	-	-	-	PseudoU_synth_2
ENBDON_01061	1240349.ANGC01000016_gene748	7.99e-193	536.0	COG0589@1|root,COG0589@2|Bacteria,2GMFE@201174|Actinobacteria,4FWRF@85025|Nocardiaceae	201174|Actinobacteria	T	Belongs to the universal stress protein A family	-	-	-	-	-	-	-	-	-	-	-	-	Usp
ENBDON_01062	1240349.ANGC01000016_gene747	1.91e-253	699.0	COG0517@1|root,COG1994@1|root,COG0517@2|Bacteria,COG1994@2|Bacteria,2GJBZ@201174|Actinobacteria,4FWTB@85025|Nocardiaceae	201174|Actinobacteria	S	Peptidase family M50	-	-	-	-	-	-	-	-	-	-	-	-	CBS,Peptidase_M50
ENBDON_01063	1240349.ANGC01000016_gene746	1.43e-197	549.0	COG0589@1|root,COG0589@2|Bacteria,2GMFE@201174|Actinobacteria,4G5Z5@85025|Nocardiaceae	201174|Actinobacteria	T	Universal stress protein family	-	-	-	-	-	-	-	-	-	-	-	-	Usp
ENBDON_01064	1429046.RR21198_3352	2.35e-243	667.0	COG0627@1|root,COG0627@2|Bacteria,2GJX4@201174|Actinobacteria,4FWMB@85025|Nocardiaceae	201174|Actinobacteria	S	Putative esterase	fbpB	GO:0001968,GO:0003674,GO:0003824,GO:0005488,GO:0005515,GO:0005575,GO:0005576,GO:0005618,GO:0005622,GO:0005623,GO:0005737,GO:0005886,GO:0006629,GO:0006643,GO:0006664,GO:0006810,GO:0006869,GO:0008150,GO:0008152,GO:0008610,GO:0009058,GO:0009247,GO:0009273,GO:0009605,GO:0009607,GO:0009893,GO:0009987,GO:0010468,GO:0010604,GO:0010628,GO:0010755,GO:0010756,GO:0010876,GO:0010954,GO:0016020,GO:0016043,GO:…	2.3.1.122,2.3.1.20	ko:K18851	ko00561,ko01100,map00561,map01100	M00089	R02251	RC00004,RC00041	ko00000,ko00001,ko00002,ko01000	-	-	-	Esterase
ENBDON_01065	1240349.ANGC01000016_gene744	7.15e-199	552.0	COG1028@1|root,COG1028@2|Bacteria,2HGEN@201174|Actinobacteria,4FXJ6@85025|Nocardiaceae	201174|Actinobacteria	IQ	Belongs to the short-chain dehydrogenases reductases (SDR) family	-	-	-	-	-	-	-	-	-	-	-	-	adh_short
ENBDON_01066	1240349.ANGC01000016_gene743	1.49e-197	548.0	COG1028@1|root,COG1028@2|Bacteria,2GIYQ@201174|Actinobacteria,4FUJM@85025|Nocardiaceae	201174|Actinobacteria	IQ	Enoyl-(Acyl carrier protein) reductase	-	-	-	-	-	-	-	-	-	-	-	-	adh_short
ENBDON_01067	1240349.ANGC01000016_gene742	9.34e-234	645.0	COG1226@1|root,COG1226@2|Bacteria,2GKB8@201174|Actinobacteria,4G6NK@85025|Nocardiaceae	201174|Actinobacteria	P	Ion channel	kch	-	-	ko:K10716	-	-	-	-	ko00000,ko02000	1.A.1.1,1.A.1.13,1.A.1.17,1.A.1.24,1.A.1.25,1.A.1.6	-	-	Ion_trans_2,TrkA_N
ENBDON_01068	1429046.RR21198_3359	2.52e-141	400.0	COG0569@1|root,COG0569@2|Bacteria,2IA09@201174|Actinobacteria,4FYYT@85025|Nocardiaceae	201174|Actinobacteria	P	TrkA-C domain	trkA	-	-	ko:K03499	-	-	-	-	ko00000,ko02000	2.A.38.1,2.A.38.4	-	-	TrkA_C,TrkA_N
ENBDON_01069	1240349.ANGC01000016_gene740	6.99e-290	796.0	COG0168@1|root,COG0168@2|Bacteria,2GKKS@201174|Actinobacteria,4FXWK@85025|Nocardiaceae	201174|Actinobacteria	P	Cation transport protein	trkH	-	-	ko:K03498	-	-	-	-	ko00000,ko02000	2.A.38.1,2.A.38.4	-	-	TrkH
ENBDON_01070	1240349.ANGC01000016_gene739	2.93e-78	234.0	arCOG03092@1|root,32YMQ@2|Bacteria,2I3JS@201174|Actinobacteria,4G6SN@85025|Nocardiaceae	201174|Actinobacteria	S	Gas vesicles are small, hollow, gas filled protein structures that are found in several microbial planktonic microorganisms. They allow the positioning of the organism at the favorable depth for growth. GvpA type proteins form the essential core of the structure	gvpA	-	-	-	-	-	-	-	-	-	-	-	Gas_vesicle
ENBDON_01071	1240349.ANGC01000016_gene738	0.0	871.0	COG1020@1|root,COG1020@2|Bacteria,2GPHZ@201174|Actinobacteria,4FXUN@85025|Nocardiaceae	201174|Actinobacteria	I	Belongs to the long-chain O-acyltransferase family	-	-	-	-	-	-	-	-	-	-	-	-	DUF1298,WES_acyltransf
ENBDON_01072	1240349.ANGC01000016_gene737	0.0	1478.0	COG4581@1|root,COG4581@2|Bacteria,2GJEX@201174|Actinobacteria,4FWB5@85025|Nocardiaceae	201174|Actinobacteria	L	DSHCT	helY	GO:0003674,GO:0003724,GO:0003824,GO:0004004,GO:0004386,GO:0005575,GO:0005618,GO:0005622,GO:0005623,GO:0005737,GO:0005829,GO:0005886,GO:0006139,GO:0006401,GO:0006725,GO:0006807,GO:0008026,GO:0008150,GO:0008152,GO:0008186,GO:0009056,GO:0009057,GO:0009987,GO:0016020,GO:0016070,GO:0016462,GO:0016787,GO:0016817,GO:0016818,GO:0016887,GO:0017111,GO:0019439,GO:0030312,GO:0034641,GO:0034655,GO:0042623,GO:…	-	ko:K03727	-	-	-	-	ko00000,ko01000	-	-	-	DEAD,DSHCT,Helicase_C,rRNA_proc-arch
ENBDON_01073	1240349.ANGC01000016_gene736	1.1e-93	273.0	COG1764@1|root,COG1764@2|Bacteria,2IID0@201174|Actinobacteria,4G16I@85025|Nocardiaceae	201174|Actinobacteria	O	organic hydroperoxide resistance protein	ohr	-	-	-	-	-	-	-	-	-	-	-	OsmC
ENBDON_01074	1240349.ANGC01000016_gene735	4.87e-96	280.0	COG1846@1|root,COG1846@2|Bacteria,2IMA9@201174|Actinobacteria,4G175@85025|Nocardiaceae	201174|Actinobacteria	K	helix_turn_helix multiple antibiotic resistance protein	ohrR	-	-	-	-	-	-	-	-	-	-	-	MarR,MarR_2
ENBDON_01075	1429046.RR21198_3366	0.0	1504.0	COG0542@1|root,COG0542@2|Bacteria,2GJ73@201174|Actinobacteria,4FWB2@85025|Nocardiaceae	201174|Actinobacteria	O	Belongs to the ClpA ClpB family	-	-	-	ko:K03696	ko01100,map01100	-	-	-	ko00000,ko03110	-	-	-	AAA,AAA_2,ClpB_D2-small,Clp_N,UVR
ENBDON_01076	1240349.ANGC01000016_gene733	0.0	893.0	COG3281@1|root,COG3281@2|Bacteria,2GKAP@201174|Actinobacteria,4FZ18@85025|Nocardiaceae	201174|Actinobacteria	G	protein, probably involved in trehalose biosynthesis	mak	GO:0005575,GO:0005622,GO:0005623,GO:0005737,GO:0005829,GO:0005886,GO:0005975,GO:0005984,GO:0005991,GO:0005992,GO:0006793,GO:0006796,GO:0008150,GO:0008152,GO:0009058,GO:0009311,GO:0009312,GO:0009987,GO:0016020,GO:0016051,GO:0016310,GO:0034637,GO:0040007,GO:0044237,GO:0044238,GO:0044249,GO:0044262,GO:0044424,GO:0044444,GO:0044464,GO:0046351,GO:0046835,GO:0071704,GO:0071944,GO:1901576	2.7.1.175	ko:K16146	ko00500,ko01100,map00500,map01100	-	R09945	RC00002,RC00078	ko00000,ko00001,ko01000	-	-	-	APH
ENBDON_01077	1429046.RR21198_3373	0.0	1259.0	COG0366@1|root,COG0366@2|Bacteria,2GIV1@201174|Actinobacteria,4FV63@85025|Nocardiaceae	201174|Actinobacteria	G	Trehalose synthase	treS	GO:0000023,GO:0000271,GO:0003674,GO:0003824,GO:0004553,GO:0004556,GO:0005488,GO:0005509,GO:0005575,GO:0005622,GO:0005623,GO:0005737,GO:0005829,GO:0005886,GO:0005975,GO:0005976,GO:0005977,GO:0005978,GO:0005984,GO:0005991,GO:0005992,GO:0006073,GO:0006091,GO:0006112,GO:0008150,GO:0008152,GO:0009058,GO:0009059,GO:0009250,GO:0009311,GO:0009312,GO:0009987,GO:0015980,GO:0016020,GO:0016051,GO:0016160,GO:…	3.2.1.1,5.4.99.16	ko:K05343	ko00500,ko01100,map00500,map01100	-	R01557,R02108,R02112,R11262	RC01816	ko00000,ko00001,ko01000	-	GH13	iNJ661.Rv0126	Alpha-amylase,Malt_amylase_C
ENBDON_01078	1240349.ANGC01000063_gene4336	1.76e-256	703.0	COG0722@1|root,COG0722@2|Bacteria,2GMVF@201174|Actinobacteria,4FWQ4@85025|Nocardiaceae	201174|Actinobacteria	E	Stereospecific condensation of phosphoenolpyruvate (PEP) and D-erythrose-4-phosphate (E4P) giving rise to 3-deoxy-D- arabino-heptulosonate-7-phosphate (DAHP)	aroG	-	2.5.1.54	ko:K01626	ko00400,ko01100,ko01110,ko01130,ko01230,ko02024,map00400,map01100,map01110,map01130,map01230,map02024	M00022	R01826	RC00435	ko00000,ko00001,ko00002,ko01000	-	-	-	DAHP_synth_1
ENBDON_01079	1429046.RR21198_3375	1.7e-202	561.0	COG1216@1|root,COG1216@2|Bacteria,2I3PV@201174|Actinobacteria,4G9KS@85025|Nocardiaceae	201174|Actinobacteria	CG	Glycosyltransferase like family 2	-	-	-	-	-	-	-	-	-	-	-	-	Glycos_transf_2
ENBDON_01080	1240349.ANGC01000063_gene4338	1.87e-216	597.0	COG5285@1|root,COG5285@2|Bacteria,2GP1T@201174|Actinobacteria,4FU75@85025|Nocardiaceae	201174|Actinobacteria	Q	Phytanoyl-CoA dioxygenase (PhyH)	ectD	-	1.14.11.55	ko:K10674	ko00260,ko01120,map00260,map01120	-	R08050	RC00661	ko00000,ko00001,ko01000	-	-	-	PhyH
ENBDON_01081	1429046.RR21198_3377	1.28e-231	639.0	COG1063@1|root,COG1063@2|Bacteria,2GNFX@201174|Actinobacteria,4FUPQ@85025|Nocardiaceae	201174|Actinobacteria	E	Alcohol dehydrogenase GroES-like domain	-	-	-	-	-	-	-	-	-	-	-	-	ADH_N,ADH_zinc_N
ENBDON_01082	1240349.ANGC01000063_gene4340	3.98e-101	292.0	COG0346@1|root,COG0346@2|Bacteria,2IM20@201174|Actinobacteria,4G1M5@85025|Nocardiaceae	201174|Actinobacteria	E	lactoylglutathione lyase activity	-	-	-	-	-	-	-	-	-	-	-	-	-
ENBDON_01083	1240349.ANGC01000063_gene4341	9.71e-228	628.0	COG2207@1|root,COG2207@2|Bacteria,2IARM@201174|Actinobacteria,4G9BG@85025|Nocardiaceae	201174|Actinobacteria	K	AraC family transcriptional regulator	-	-	-	-	-	-	-	-	-	-	-	-	Arabinose_bd,HTH_18
ENBDON_01084	1240349.ANGC01000063_gene4342	1.64e-282	772.0	COG0436@1|root,COG0436@2|Bacteria,2GJ7R@201174|Actinobacteria,4FU7E@85025|Nocardiaceae	201174|Actinobacteria	E	Cys/Met metabolism PLP-dependent enzyme	dapC	GO:0005575,GO:0005618,GO:0005623,GO:0030312,GO:0044464,GO:0071944	2.6.1.1,2.6.1.17,2.6.1.2,2.6.1.66	ko:K00812,ko:K14260,ko:K14267	ko00220,ko00250,ko00270,ko00290,ko00300,ko00330,ko00350,ko00360,ko00400,ko00401,ko00950,ko00960,ko01100,ko01110,ko01120,ko01130,ko01210,ko01230,map00220,map00250,map00270,map00290,map00300,map00330,map00350,map00360,map00400,map00401,map00950,map00960,map01100,map01110,map01120,map01130,map01210,map01230	M00016	R00258,R00355,R00694,R00734,R00896,R01215,R02433,R02619,R04475,R05052	RC00006,RC00008,RC00036	ko00000,ko00001,ko00002,ko01000,ko01007	-	-	iNJ661.Rv0858c	Aminotran_1_2
ENBDON_01085	1240349.ANGC01000063_gene4343	2.83e-138	391.0	COG2128@1|root,COG2128@2|Bacteria,2I829@201174|Actinobacteria,4FVHX@85025|Nocardiaceae	201174|Actinobacteria	S	Carboxymuconolactone decarboxylase family	-	-	-	ko:K07486	-	-	-	-	ko00000	-	-	-	CMD
ENBDON_01086	1240349.ANGC01000063_gene4344	1.99e-99	288.0	COG0346@1|root,COG0346@2|Bacteria,2IMDZ@201174|Actinobacteria,4G1YU@85025|Nocardiaceae	201174|Actinobacteria	E	COG0346 Lactoylglutathione lyase and related lyases	-	-	-	ko:K07032	-	-	-	-	ko00000	-	-	-	Glyoxalase
ENBDON_01087	1240349.ANGC01000063_gene4345	2.13e-201	559.0	COG1595@1|root,COG1595@2|Bacteria,2GKBH@201174|Actinobacteria,4FW5E@85025|Nocardiaceae	201174|Actinobacteria	K	Belongs to the sigma-70 factor family. ECF subfamily	sigJ	GO:0000988,GO:0000990,GO:0003674,GO:0006355,GO:0008150,GO:0009889,GO:0010468,GO:0010556,GO:0016987,GO:0019219,GO:0019222,GO:0031323,GO:0031326,GO:0043254,GO:0044087,GO:0050789,GO:0050794,GO:0051128,GO:0051171,GO:0051252,GO:0060255,GO:0065007,GO:0080090,GO:0140110,GO:1903506,GO:2000112,GO:2000142,GO:2001141	-	ko:K03088	-	-	-	-	ko00000,ko03021	-	-	-	Sigma70_r2,Sigma70_r4_2,SnoaL_2
ENBDON_01088	1429046.RR21198_3385	1.66e-246	678.0	COG0715@1|root,COG0715@2|Bacteria,2HHAU@201174|Actinobacteria,4FWXN@85025|Nocardiaceae	201174|Actinobacteria	P	NMT1-like family	-	-	-	-	-	-	-	-	-	-	-	-	NMT1
ENBDON_01089	1240349.ANGC01000063_gene4347	1.68e-187	521.0	COG1116@1|root,COG1116@2|Bacteria,2GN33@201174|Actinobacteria,4FWU6@85025|Nocardiaceae	201174|Actinobacteria	P	ATPases associated with a variety of cellular activities	-	-	-	ko:K02049	-	M00188	-	-	ko00000,ko00002,ko02000	3.A.1.16,3.A.1.17	-	-	ABC_tran
ENBDON_01090	1429046.RR21198_3387	7.66e-177	496.0	COG0600@1|root,COG0600@2|Bacteria,2GKKZ@201174|Actinobacteria,4FVST@85025|Nocardiaceae	201174|Actinobacteria	P	Binding-protein-dependent transport system inner membrane component	-	-	-	ko:K02050	-	M00188	-	-	ko00000,ko00002,ko02000	3.A.1.16,3.A.1.17	-	-	BPD_transp_1
ENBDON_01091	1429046.RR21198_3388	3.98e-312	852.0	COG2141@1|root,COG2141@2|Bacteria,2GJAN@201174|Actinobacteria,4FX71@85025|Nocardiaceae	201174|Actinobacteria	C	Luciferase-like monooxygenase	-	-	-	-	-	-	-	-	-	-	-	-	Bac_luciferase
ENBDON_01092	1240349.ANGC01000063_gene4350	1.79e-241	662.0	COG2141@1|root,COG2141@2|Bacteria,2GJ6T@201174|Actinobacteria,4FX1U@85025|Nocardiaceae	201174|Actinobacteria	C	Luciferase-like monooxygenase	-	-	-	-	-	-	-	-	-	-	-	-	Bac_luciferase
ENBDON_01093	1240349.ANGC01000063_gene4351	2.03e-130	370.0	COG1670@1|root,COG1670@2|Bacteria,2GMDB@201174|Actinobacteria,4G15G@85025|Nocardiaceae	201174|Actinobacteria	J	Acetyltransferase (GNAT) domain	-	-	-	-	-	-	-	-	-	-	-	-	Acetyltransf_3,PRA-PH
ENBDON_01094	1429046.RR21198_3393	3.45e-137	390.0	2DYZQ@1|root,32V6C@2|Bacteria,2IR9G@201174|Actinobacteria,4FY16@85025|Nocardiaceae	201174|Actinobacteria	S	Protein of unknown function (DUF3239)	-	-	-	-	-	-	-	-	-	-	-	-	DUF3239
ENBDON_01095	1240349.ANGC01000063_gene4353	4.2e-26	100.0	2EUD9@1|root,33MVN@2|Bacteria,2GW37@201174|Actinobacteria,4G38C@85025|Nocardiaceae	201174|Actinobacteria	-	-	-	-	-	-	-	-	-	-	-	-	-	-	-
ENBDON_01097	1240349.ANGC01000063_gene4354	9.69e-293	804.0	COG2851@1|root,COG2851@2|Bacteria,2GNWE@201174|Actinobacteria,4FV4T@85025|Nocardiaceae	201174|Actinobacteria	C	Na+/H+ antiporter family	citN	-	-	ko:K03300	-	-	-	-	ko00000	2.A.11	-	-	CitMHS
ENBDON_01098	1240349.ANGC01000063_gene4355	0.0	1021.0	COG3290@1|root,COG3290@2|Bacteria,2GIRZ@201174|Actinobacteria,4FVNN@85025|Nocardiaceae	201174|Actinobacteria	T	Signal transduction histidine kinase regulating citrate malate metabolism	citA	-	2.7.13.3	ko:K02476	-	-	-	-	ko00000,ko01000,ko01001,ko02022	-	-	-	HATPase_c,PAS,SPOB_a,sCache_3_2
ENBDON_01099	1240349.ANGC01000063_gene4356	3.85e-134	382.0	COG4565@1|root,COG4565@2|Bacteria,2GK16@201174|Actinobacteria,4FXPF@85025|Nocardiaceae	201174|Actinobacteria	T	transcriptional regulatory protein	citB	-	-	ko:K02475	-	-	-	-	ko00000,ko02022	-	-	-	HTH_11,HTH_IclR,Response_reg,TrmB
ENBDON_01100	1429046.RR21198_3398	0.0	1081.0	COG1061@1|root,COG1061@2|Bacteria,2GIR9@201174|Actinobacteria,4FXQC@85025|Nocardiaceae	201174|Actinobacteria	L	ERCC3/RAD25/XPB C-terminal helicase	ercc3	-	3.6.4.12	ko:K10843	ko03022,ko03420,map03022,map03420	M00290	-	-	ko00000,ko00001,ko00002,ko01000,ko03021,ko03400	-	-	-	ERCC3_RAD25_C,Helicase_C_3,ResIII
ENBDON_01101	1429046.RR21198_3399	0.0	1295.0	COG2378@1|root,COG2378@2|Bacteria,2GURQ@201174|Actinobacteria,4FXF3@85025|Nocardiaceae	201174|Actinobacteria	K	Helicase conserved C-terminal domain	-	-	-	-	-	-	-	-	-	-	-	-	Helicase_C_3
ENBDON_01102	1240349.ANGC01000001_gene2405	9.18e-41	134.0	2C7NN@1|root,33FDU@2|Bacteria,2GR44@201174|Actinobacteria,4G3SQ@85025|Nocardiaceae	201174|Actinobacteria	-	-	-	-	-	-	-	-	-	-	-	-	-	-	-
ENBDON_01103	1240349.ANGC01000001_gene2406	1.45e-122	351.0	COG1652@1|root,COG1652@2|Bacteria,2GK68@201174|Actinobacteria,4FU35@85025|Nocardiaceae	201174|Actinobacteria	S	Protein of unknown function (DUF3235)	rpfA	GO:0005575,GO:0005576,GO:0008150,GO:0009892,GO:0010468,GO:0010605,GO:0010629,GO:0019222,GO:0040008,GO:0040009,GO:0040010,GO:0045927,GO:0048518,GO:0048519,GO:0050789,GO:0060255,GO:0065007	-	ko:K21687	-	-	-	-	ko00000	-	GH23	-	DUF3235,Transglycosylas
ENBDON_01104	1429046.RR21198_1492	7.36e-76	228.0	COG3304@1|root,COG3304@2|Bacteria,2IKS5@201174|Actinobacteria,4G1FC@85025|Nocardiaceae	201174|Actinobacteria	S	Inner membrane component domain	yccF	-	-	-	-	-	-	-	-	-	-	-	YccF
ENBDON_01105	1429046.RR21198_1491	4.56e-56	176.0	2AUBC@1|root,31JZ1@2|Bacteria,2GUWR@201174|Actinobacteria,4G3Z9@85025|Nocardiaceae	201174|Actinobacteria	-	-	-	-	-	-	-	-	-	-	-	-	-	-	-
ENBDON_01106	1429046.RR21198_1490	9.82e-92	268.0	COG1278@1|root,COG1278@2|Bacteria,2IKXN@201174|Actinobacteria,4G0Q8@85025|Nocardiaceae	201174|Actinobacteria	K	Cold shock protein domain	cspB	-	-	ko:K03704	-	-	-	-	ko00000,ko03000	-	-	-	CSD
ENBDON_01107	1240349.ANGC01000001_gene2410	2.31e-100	291.0	2EMAJ@1|root,33EZJ@2|Bacteria,2GTNB@201174|Actinobacteria,4G1QA@85025|Nocardiaceae	201174|Actinobacteria	S	Protein of unknown function (DUF2771)	-	-	-	-	-	-	-	-	-	-	-	-	DUF2771
ENBDON_01108	1240349.ANGC01000001_gene2411	0.0	996.0	COG0477@1|root,COG2814@2|Bacteria,2GKRT@201174|Actinobacteria,4FWSK@85025|Nocardiaceae	201174|Actinobacteria	EGP	Major Facilitator Superfamily	-	GO:0005575,GO:0005576,GO:0005623,GO:0005886,GO:0016020,GO:0044464,GO:0071944	-	-	-	-	-	-	-	-	-	-	MFS_1
ENBDON_01109	1240349.ANGC01000001_gene2412	1.53e-177	496.0	COG3823@1|root,COG3823@2|Bacteria,2GMGV@201174|Actinobacteria,4FUEC@85025|Nocardiaceae	201174|Actinobacteria	O	Glutamine cyclotransferase	-	-	2.3.2.5	ko:K00683	-	-	-	-	ko00000,ko01000	-	-	-	Glu_cyclase_2
ENBDON_01110	1240349.ANGC01000001_gene2413	7.25e-190	533.0	28NWB@1|root,2ZBU7@2|Bacteria,2GJ74@201174|Actinobacteria,4FU3A@85025|Nocardiaceae	201174|Actinobacteria	S	Protein of unknown function (DUF3027)	-	-	-	-	-	-	-	-	-	-	-	-	DUF3027
ENBDON_01111	1240349.ANGC01000001_gene2414	0.0	1695.0	COG3225@1|root,COG3225@2|Bacteria,2GMTX@201174|Actinobacteria,4FW13@85025|Nocardiaceae	201174|Actinobacteria	N	Histidine kinase-like ATPases	-	-	-	-	-	-	-	-	-	-	-	-	-
ENBDON_01112	1240349.ANGC01000001_gene2415	1.12e-111	323.0	COG0671@1|root,COG0671@2|Bacteria,2I9FB@201174|Actinobacteria,4G24K@85025|Nocardiaceae	201174|Actinobacteria	I	Acid phosphatase homologues	-	-	3.6.1.27	ko:K19302	ko00550,map00550	-	R05627	RC00002	ko00000,ko00001,ko01000,ko01011	-	-	-	PAP2
ENBDON_01113	1429046.RR21198_1483	1.7e-45	147.0	2CGTN@1|root,33IM2@2|Bacteria,2GWID@201174|Actinobacteria,4G338@85025|Nocardiaceae	201174|Actinobacteria	S	Protein of unknown function (DUF2530)	-	-	-	-	-	-	-	-	-	-	-	-	DUF2530
ENBDON_01114	1240349.ANGC01000001_gene2417	0.0	894.0	COG2252@1|root,COG2252@2|Bacteria,2GKYD@201174|Actinobacteria,4FXJR@85025|Nocardiaceae	201174|Actinobacteria	S	Permease family	pbuG	-	-	ko:K06901	-	-	-	-	ko00000,ko02000	2.A.1.40	-	-	Xan_ur_permease
ENBDON_01115	1435356.Y013_20545	4.15e-69	212.0	COG1846@1|root,COG1846@2|Bacteria,2IFQ9@201174|Actinobacteria,4G1PS@85025|Nocardiaceae	201174|Actinobacteria	K	MarR family	-	-	-	-	-	-	-	-	-	-	-	-	MarR
ENBDON_01116	1429046.RR21198_1480	1.38e-184	514.0	COG0566@1|root,COG0566@2|Bacteria,2GJ12@201174|Actinobacteria,4FUFP@85025|Nocardiaceae	201174|Actinobacteria	J	SpoU rRNA Methylase family	spoU2	-	-	-	-	-	-	-	-	-	-	-	SpoU_methylase
ENBDON_01117	1240349.ANGC01000001_gene2420	2.24e-55	173.0	2EVP5@1|root,33P34@2|Bacteria,2IQ93@201174|Actinobacteria,4G3Z6@85025|Nocardiaceae	201174|Actinobacteria	S	Protein of unknown function (DUF2537)	-	-	-	-	-	-	-	-	-	-	-	-	DUF2537
ENBDON_01118	1240349.ANGC01000001_gene2421	1.14e-178	497.0	2AMYE@1|root,2ZCX7@2|Bacteria,2ITA0@201174|Actinobacteria,4FY8Q@85025|Nocardiaceae	201174|Actinobacteria	-	-	-	-	-	-	-	-	-	-	-	-	-	-	-
ENBDON_01119	1240349.ANGC01000001_gene2422	4.4e-207	573.0	28PUQ@1|root,2ZCFK@2|Bacteria,2GNQM@201174|Actinobacteria,4G9DT@85025|Nocardiaceae	201174|Actinobacteria	S	Protein of unknown function (DUF3071)	-	GO:0008150,GO:0040007	-	-	-	-	-	-	-	-	-	-	DUF3071
ENBDON_01120	1240349.ANGC01000001_gene2423	1.87e-269	737.0	COG1932@1|root,COG1932@2|Bacteria,2GKYK@201174|Actinobacteria,4FY3I@85025|Nocardiaceae	201174|Actinobacteria	E	Catalyzes the reversible conversion of 3- phosphohydroxypyruvate to phosphoserine and of 3-hydroxy-2-oxo-4- phosphonooxybutanoate to phosphohydroxythreonine	serC	GO:0001505,GO:0003674,GO:0003824,GO:0004760,GO:0005575,GO:0005576,GO:0005622,GO:0005623,GO:0005737,GO:0005777,GO:0005886,GO:0006082,GO:0006520,GO:0006544,GO:0006545,GO:0006807,GO:0008150,GO:0008152,GO:0008453,GO:0008483,GO:0008652,GO:0009058,GO:0009069,GO:0009070,GO:0009987,GO:0016020,GO:0016053,GO:0016740,GO:0016769,GO:0017144,GO:0019265,GO:0019752,GO:0040007,GO:0042133,GO:0042136,GO:0042579,GO:…	2.6.1.52	ko:K00831	ko00260,ko00680,ko00750,ko01100,ko01120,ko01130,ko01200,ko01230,map00260,map00680,map00750,map01100,map01120,map01130,map01200,map01230	M00020,M00124	R04173,R05085	RC00006,RC00036	ko00000,ko00001,ko00002,ko01000,ko01007	-	-	-	Aminotran_5
ENBDON_01121	1240349.ANGC01000001_gene2424	1.79e-268	735.0	COG0372@1|root,COG0372@2|Bacteria,2GKST@201174|Actinobacteria,4FU6T@85025|Nocardiaceae	201174|Actinobacteria	C	Belongs to the citrate synthase family	citA	GO:0005575,GO:0005622,GO:0005623,GO:0005737,GO:0005829,GO:0044424,GO:0044444,GO:0044464	2.3.3.1	ko:K01647	ko00020,ko00630,ko01100,ko01110,ko01120,ko01130,ko01200,ko01210,ko01230,map00020,map00630,map01100,map01110,map01120,map01130,map01200,map01210,map01230	M00009,M00010,M00012,M00740	R00351	RC00004,RC00067	br01601,ko00000,ko00001,ko00002,ko01000	-	-	-	Citrate_synt
ENBDON_01122	1240349.ANGC01000001_gene2425	9.06e-180	500.0	COG0259@1|root,COG0259@2|Bacteria,2GJCR@201174|Actinobacteria,4FYPF@85025|Nocardiaceae	201174|Actinobacteria	H	Catalyzes the oxidation of either pyridoxine 5'- phosphate (PNP) or pyridoxamine 5'-phosphate (PMP) into pyridoxal 5'-phosphate (PLP)	pdxH	GO:0000166,GO:0003674,GO:0003824,GO:0005488,GO:0005515,GO:0006081,GO:0006725,GO:0006732,GO:0006766,GO:0006767,GO:0006793,GO:0006796,GO:0006807,GO:0008150,GO:0008152,GO:0009058,GO:0009108,GO:0009110,GO:0009987,GO:0010181,GO:0016491,GO:0016614,GO:0016899,GO:0017144,GO:0018130,GO:0019438,GO:0019637,GO:0032553,GO:0034641,GO:0036094,GO:0042364,GO:0042802,GO:0042803,GO:0042816,GO:0042819,GO:0042822,GO:…	1.4.3.5	ko:K00275	ko00750,ko01100,ko01120,map00750,map01100,map01120	M00124	R00277,R00278,R01710,R01711	RC00048,RC00116	ko00000,ko00001,ko00002,ko01000	-	-	iNJ661.Rv2607	PNP_phzG_C,Putative_PNPOx
ENBDON_01123	1240349.ANGC01000001_gene2426	1.63e-281	772.0	COG0477@1|root,COG0477@2|Bacteria,2GKFJ@201174|Actinobacteria,4FVUY@85025|Nocardiaceae	201174|Actinobacteria	EGP	Transmembrane secretion effector	entS_1	-	-	-	-	-	-	-	-	-	-	-	MFS_3
ENBDON_01124	1240349.ANGC01000001_gene2427	1.23e-53	169.0	2B35N@1|root,31VTJ@2|Bacteria,2H0SE@201174|Actinobacteria,4G4F8@85025|Nocardiaceae	201174|Actinobacteria	-	-	-	-	-	-	-	-	-	-	-	-	-	-	-
ENBDON_01125	1240349.ANGC01000001_gene2428	1.24e-236	652.0	COG2220@1|root,COG2220@2|Bacteria,2GMFQ@201174|Actinobacteria,4FZHW@85025|Nocardiaceae	201174|Actinobacteria	S	Metallo-beta-lactamase superfamily	-	-	-	-	-	-	-	-	-	-	-	-	Lactamase_B,Lactamase_B_2,Lactamase_B_3
ENBDON_01126	1240349.ANGC01000001_gene2429	2.51e-234	643.0	COG2017@1|root,COG2017@2|Bacteria,2GJ0H@201174|Actinobacteria,4FXP5@85025|Nocardiaceae	201174|Actinobacteria	G	Aldose 1-epimerase	galM	-	5.1.3.3	ko:K01785	ko00010,ko00052,ko01100,ko01110,ko01120,ko01130,map00010,map00052,map01100,map01110,map01120,map01130	M00632	R01602,R10619	RC00563	ko00000,ko00001,ko00002,ko01000	-	-	-	Aldose_epim
ENBDON_01127	1429046.RR21198_1467	1.09e-307	839.0	COG0372@1|root,COG0372@2|Bacteria,2GJ7E@201174|Actinobacteria,4FVFY@85025|Nocardiaceae	201174|Actinobacteria	C	Belongs to the citrate synthase family	gltA	GO:0005575,GO:0005622,GO:0005623,GO:0005737,GO:0005829,GO:0005886,GO:0016020,GO:0044424,GO:0044444,GO:0044464,GO:0071944	2.3.3.1	ko:K01647	ko00020,ko00630,ko01100,ko01110,ko01120,ko01130,ko01200,ko01210,ko01230,map00020,map00630,map01100,map01110,map01120,map01130,map01200,map01210,map01230	M00009,M00010,M00012,M00740	R00351	RC00004,RC00067	br01601,ko00000,ko00001,ko00002,ko01000	-	-	-	Citrate_synt
ENBDON_01128	1240349.ANGC01000001_gene2431	4e-175	488.0	COG0545@1|root,COG0545@2|Bacteria,2IHQC@201174|Actinobacteria,4G16T@85025|Nocardiaceae	201174|Actinobacteria	O	Peptidyl-prolyl cis-trans	fkbP	-	5.2.1.8	ko:K01802,ko:K03772	-	-	-	-	ko00000,ko01000,ko03110	-	-	-	FKBP_C
ENBDON_01129	1429046.RR21198_1465	1.27e-52	166.0	29R87@1|root,30C9J@2|Bacteria,2HJQG@201174|Actinobacteria,4G778@85025|Nocardiaceae	201174|Actinobacteria	-	-	-	-	-	-	-	-	-	-	-	-	-	-	-
ENBDON_01130	1240349.ANGC01000001_gene2433	1.04e-277	764.0	COG0642@1|root,COG0642@2|Bacteria,2I2NI@201174|Actinobacteria,4G9DQ@85025|Nocardiaceae	201174|Actinobacteria	T	His Kinase A (phosphoacceptor) domain	prrB	-	2.7.13.3	ko:K07655	ko02020,map02020	M00462	-	-	ko00000,ko00001,ko00002,ko01000,ko01001,ko02022	-	-	-	HATPase_c,HisKA
ENBDON_01131	1240349.ANGC01000001_gene2434	4.98e-155	436.0	COG0745@1|root,COG0745@2|Bacteria,2GNFH@201174|Actinobacteria,4FW3F@85025|Nocardiaceae	201174|Actinobacteria	T	Transcriptional regulatory protein, C terminal	prrA	GO:0000287,GO:0003674,GO:0005488,GO:0005509,GO:0005575,GO:0005622,GO:0005623,GO:0005737,GO:0005829,GO:0005886,GO:0008150,GO:0016020,GO:0040007,GO:0043167,GO:0043169,GO:0044110,GO:0044403,GO:0044419,GO:0044424,GO:0044444,GO:0044464,GO:0046872,GO:0051704,GO:0071944	-	ko:K07671	ko02020,map02020	M00462	-	-	ko00000,ko00001,ko00002,ko02022	-	-	-	Response_reg,Trans_reg_C
ENBDON_01132	1240349.ANGC01000001_gene2435	6.62e-140	396.0	COG1309@1|root,COG1309@2|Bacteria,2GMNZ@201174|Actinobacteria,4FWDJ@85025|Nocardiaceae	201174|Actinobacteria	K	transcriptional regulator	-	-	-	-	-	-	-	-	-	-	-	-	TetR_N
ENBDON_01133	1240349.ANGC01000001_gene2436	0.0	1185.0	COG1960@1|root,COG1960@2|Bacteria,2GJIB@201174|Actinobacteria,4FWHN@85025|Nocardiaceae	201174|Actinobacteria	I	Acyl-CoA dehydrogenase N terminal	-	-	1.3.8.1	ko:K00248	ko00071,ko00280,ko00650,ko01100,ko01110,ko01120,ko01200,ko01212,map00071,map00280,map00650,map01100,map01110,map01120,map01200,map01212	-	R01175,R01178,R02661,R03172,R04751	RC00052,RC00068,RC00076,RC00120,RC00148	ko00000,ko00001,ko01000	-	-	-	Acyl-CoA_dh_1,Acyl-CoA_dh_C,Acyl-CoA_dh_M,Acyl-CoA_dh_N,AcylCoA_DH_N
ENBDON_01134	1240349.ANGC01000001_gene2437	1.57e-134	381.0	COG0262@1|root,COG0262@2|Bacteria,2GW5J@201174|Actinobacteria,4FU3I@85025|Nocardiaceae	201174|Actinobacteria	H	RibD C-terminal domain	-	-	-	-	-	-	-	-	-	-	-	-	RibD_C
ENBDON_01135	1240349.ANGC01000001_gene2438	1.63e-133	379.0	COG3226@1|root,COG3226@2|Bacteria,2IFQM@201174|Actinobacteria,4FU8X@85025|Nocardiaceae	201174|Actinobacteria	K	Bacterial regulatory proteins, tetR family	-	-	-	-	-	-	-	-	-	-	-	-	TetR_N
ENBDON_01136	1240349.ANGC01000001_gene2439	5.15e-105	304.0	COG1546@1|root,COG1546@2|Bacteria,2IQF0@201174|Actinobacteria,4G25Z@85025|Nocardiaceae	201174|Actinobacteria	S	Belongs to the CinA family	-	-	3.5.1.42	ko:K03743	ko00760,map00760	-	R02322	RC00100	ko00000,ko00001,ko01000	-	-	-	CinA
ENBDON_01137	1240349.ANGC01000001_gene2440	3.26e-230	636.0	COG2170@1|root,COG2170@2|Bacteria,2GKAA@201174|Actinobacteria,4G079@85025|Nocardiaceae	201174|Actinobacteria	S	ATP-dependent carboxylate-amine ligase which exhibits weak glutamate--cysteine ligase activity	-	-	-	ko:K06048	-	-	-	-	ko00000,ko01000	-	-	-	GCS2
ENBDON_01138	1240349.ANGC01000001_gene2441	1.37e-166	467.0	COG1985@1|root,COG1985@2|Bacteria,2GN2P@201174|Actinobacteria,4FWFB@85025|Nocardiaceae	201174|Actinobacteria	H	RibD C-terminal domain	-	-	1.1.1.193	ko:K00082	ko00740,ko01100,ko01110,map00740,map01100,map01110	M00125	R03458	RC00933	ko00000,ko00001,ko00002,ko01000	-	-	-	RibD_C
ENBDON_01139	1240349.ANGC01000001_gene2442	0.0	874.0	COG1295@1|root,COG1295@2|Bacteria,2GM6P@201174|Actinobacteria,4FUBG@85025|Nocardiaceae	201174|Actinobacteria	S	Virulence factor BrkB	-	-	-	ko:K07058	-	-	-	-	ko00000	-	-	-	Virul_fac_BrkB
ENBDON_01140	1240349.ANGC01000001_gene2443	2.04e-38	129.0	2DSJ3@1|root,33GD4@2|Bacteria,2GXFK@201174|Actinobacteria,4G4WA@85025|Nocardiaceae	201174|Actinobacteria	S	Protein of unknown function (DUF3618)	-	-	-	-	-	-	-	-	-	-	-	-	DUF3618
ENBDON_01141	1240349.ANGC01000001_gene2444	1.03e-191	536.0	COG5340@1|root,COG5340@2|Bacteria,2II40@201174|Actinobacteria,4G06Z@85025|Nocardiaceae	201174|Actinobacteria	K	Psort location Cytoplasmic, score	-	-	-	-	-	-	-	-	-	-	-	-	AbiEi_4
ENBDON_01142	1240349.ANGC01000001_gene2445	0.0	1248.0	COG0365@1|root,COG0365@2|Bacteria,2GP7N@201174|Actinobacteria,4FV0U@85025|Nocardiaceae	201174|Actinobacteria	I	Acetyl-coenzyme A synthetase N-terminus	prpE	-	6.2.1.17	ko:K01908	ko00640,ko01100,map00640,map01100	-	R00926,R01354	RC00004,RC00043,RC00070,RC02816	ko00000,ko00001,ko01000,ko01004	-	-	-	ACAS_N,AMP-binding,AMP-binding_C
ENBDON_01143	1429046.RR21198_1451	0.0	941.0	COG0777@1|root,COG0825@1|root,COG0777@2|Bacteria,COG0825@2|Bacteria,2GNP7@201174|Actinobacteria,4FVUF@85025|Nocardiaceae	201174|Actinobacteria	I	Acetyl-CoA carboxylase	accD3	GO:0005575,GO:0005623,GO:0005886,GO:0006082,GO:0006629,GO:0006631,GO:0006633,GO:0008150,GO:0008152,GO:0008610,GO:0009058,GO:0009059,GO:0009273,GO:0009987,GO:0016020,GO:0016053,GO:0019752,GO:0032787,GO:0034645,GO:0042546,GO:0043170,GO:0043436,GO:0044036,GO:0044038,GO:0044085,GO:0044237,GO:0044238,GO:0044249,GO:0044255,GO:0044260,GO:0044281,GO:0044283,GO:0044464,GO:0046394,GO:0070589,GO:0071554,GO:…	2.1.3.15,6.4.1.2	ko:K01962,ko:K01963	ko00061,ko00620,ko00640,ko00720,ko01100,ko01110,ko01120,ko01130,ko01200,ko01212,map00061,map00620,map00640,map00720,map01100,map01110,map01120,map01130,map01200,map01212	M00082,M00376	R00742,R04386	RC00040,RC00253,RC00367	ko00000,ko00001,ko00002,ko01000	-	-	-	Carboxyl_trans
ENBDON_01144	1429046.RR21198_1450	8.67e-246	679.0	COG1668@1|root,COG1668@2|Bacteria,2I9MY@201174|Actinobacteria,4FWJ8@85025|Nocardiaceae	201174|Actinobacteria	CP	ABC-2 family transporter protein	yhaP	-	-	ko:K01992	-	M00254	-	-	ko00000,ko00002,ko02000	3.A.1	-	-	ABC2_membrane_3
ENBDON_01145	1240349.ANGC01000001_gene2448	1.11e-204	567.0	COG4152@1|root,COG4152@2|Bacteria,2I2DK@201174|Actinobacteria,4FVMG@85025|Nocardiaceae	201174|Actinobacteria	S	ABC transporter	-	-	-	ko:K01990	-	M00254	-	-	ko00000,ko00002,ko02000	3.A.1	-	-	ABC_tran,DUF4162
ENBDON_01146	1240349.ANGC01000001_gene2449	7.03e-116	333.0	2CCA4@1|root,33W54@2|Bacteria,2HFJY@201174|Actinobacteria,4FX9U@85025|Nocardiaceae	201174|Actinobacteria	-	-	-	-	-	-	-	-	-	-	-	-	-	-	-
ENBDON_01147	1240349.ANGC01000001_gene2450	4.43e-61	187.0	COG1476@1|root,COG1476@2|Bacteria,2IRJP@201174|Actinobacteria,4G38V@85025|Nocardiaceae	201174|Actinobacteria	K	Helix-turn-helix	-	-	-	-	-	-	-	-	-	-	-	-	HTH_3
ENBDON_01148	1240349.ANGC01000001_gene2451	3.46e-78	233.0	COG1188@1|root,COG1188@2|Bacteria,2IQ6F@201174|Actinobacteria,4G239@85025|Nocardiaceae	201174|Actinobacteria	J	Ribosome-associated heat shock protein implicated in the recycling of the 50S subunit S4 paralog	hslR	-	-	ko:K04762	-	-	-	-	ko00000,ko03110	-	-	-	S4
ENBDON_01149	1240349.ANGC01000001_gene2452	0.0	1015.0	COG0488@1|root,COG0488@2|Bacteria,2GK9S@201174|Actinobacteria,4FXJ1@85025|Nocardiaceae	201174|Actinobacteria	S	ABC transporter	yjjK	-	-	-	-	-	-	-	-	-	-	-	ABC_tran
ENBDON_01150	1240349.ANGC01000001_gene2453	1.57e-193	537.0	COG0656@1|root,COG0656@2|Bacteria,2GJQ7@201174|Actinobacteria,4FU3G@85025|Nocardiaceae	201174|Actinobacteria	S	Aldo/keto reductase family	dkgA	GO:0005575,GO:0005618,GO:0005623,GO:0005886,GO:0008150,GO:0016020,GO:0030312,GO:0040007,GO:0044464,GO:0071944	1.1.1.346	ko:K06221	-	-	R08878	RC00089	ko00000,ko01000	-	-	-	Aldo_ket_red
ENBDON_01151	1240349.ANGC01000001_gene2454	6.74e-122	347.0	COG3467@1|root,COG3467@2|Bacteria,2IHW4@201174|Actinobacteria,4G2DX@85025|Nocardiaceae	201174|Actinobacteria	S	Pyridoxamine 5'-phosphate oxidase	-	-	-	-	-	-	-	-	-	-	-	-	Putative_PNPOx
ENBDON_01152	1240349.ANGC01000001_gene2455	9.95e-228	630.0	COG0265@1|root,COG0265@2|Bacteria,2GJJ3@201174|Actinobacteria,4FWUV@85025|Nocardiaceae	201174|Actinobacteria	O	Domain present in PSD-95, Dlg, and ZO-1/2.	pepA	-	-	ko:K08372	ko02020,map02020	-	-	-	ko00000,ko00001,ko01000,ko01002	-	-	-	PDZ_2,Trypsin_2
ENBDON_01153	1240349.ANGC01000001_gene2456	1.21e-266	729.0	COG2072@1|root,COG2072@2|Bacteria,2GK95@201174|Actinobacteria,4FXH3@85025|Nocardiaceae	201174|Actinobacteria	P	Flavin-binding monooxygenase-like	-	-	-	-	-	-	-	-	-	-	-	-	Pyr_redox_2,Pyr_redox_3
ENBDON_01154	1240349.ANGC01000001_gene2457	4.2e-188	525.0	COG0330@1|root,COG0330@2|Bacteria,2GM0Z@201174|Actinobacteria,4FUVM@85025|Nocardiaceae	201174|Actinobacteria	O	prohibitin homologues	f42a	-	-	-	-	-	-	-	-	-	-	-	Band_7
ENBDON_01155	1240349.ANGC01000001_gene2458	8.23e-39	129.0	COG4877@1|root,COG4877@2|Bacteria,2GQV1@201174|Actinobacteria,4G3V1@85025|Nocardiaceae	201174|Actinobacteria	-	-	-	-	-	-	-	-	-	-	-	-	-	-	-
ENBDON_01156	1240349.ANGC01000001_gene2459	9.98e-161	451.0	COG1024@1|root,COG1024@2|Bacteria,2GJG7@201174|Actinobacteria,4FW0G@85025|Nocardiaceae	201174|Actinobacteria	I	Belongs to the enoyl-CoA hydratase isomerase family	echA6	GO:0003674,GO:0003824,GO:0004300,GO:0005575,GO:0005618,GO:0005623,GO:0005886,GO:0006082,GO:0006629,GO:0006631,GO:0006635,GO:0008150,GO:0008152,GO:0009056,GO:0009062,GO:0009987,GO:0016020,GO:0016042,GO:0016054,GO:0016829,GO:0016835,GO:0016836,GO:0019395,GO:0019752,GO:0030258,GO:0030312,GO:0032787,GO:0034440,GO:0043436,GO:0044237,GO:0044238,GO:0044242,GO:0044248,GO:0044255,GO:0044281,GO:0044282,GO:…	4.2.1.17	ko:K01692	ko00071,ko00280,ko00281,ko00310,ko00360,ko00362,ko00380,ko00410,ko00627,ko00640,ko00650,ko00903,ko00930,ko01100,ko01110,ko01120,ko01130,ko01212,map00071,map00280,map00281,map00310,map00360,map00362,map00380,map00410,map00627,map00640,map00650,map00903,map00930,map01100,map01110,map01120,map01130,map01212	M00032,M00087	R03026,R03045,R04137,R04170,R04204,R04224,R04738,R04740,R04744,R04746,R04749,R05595,R06411,R06412,R06942,R08093	RC00831,RC00834,RC01086,RC01095,RC01098,RC01103,RC01217,RC02115	ko00000,ko00001,ko00002,ko01000	-	-	-	ECH_1
ENBDON_01157	1240349.ANGC01000001_gene2460	6.78e-271	741.0	COG2220@1|root,COG2220@2|Bacteria,2GNXJ@201174|Actinobacteria,4FVKS@85025|Nocardiaceae	201174|Actinobacteria	S	Beta-lactamase superfamily domain	-	-	-	-	-	-	-	-	-	-	-	-	Lactamase_B_2
ENBDON_01158	1240349.ANGC01000001_gene2461	1.86e-131	378.0	COG0428@1|root,COG0428@2|Bacteria,2GISJ@201174|Actinobacteria,4G2W8@85025|Nocardiaceae	201174|Actinobacteria	P	zinc transporter	-	-	-	ko:K07238	-	-	-	-	ko00000,ko02000	2.A.5.5	-	-	Zip
ENBDON_01159	1240349.ANGC01000001_gene2462	4.2e-63	194.0	2E7YB@1|root,332CR@2|Bacteria,2IRTP@201174|Actinobacteria,4G2XR@85025|Nocardiaceae	201174|Actinobacteria	-	-	-	-	-	-	-	-	-	-	-	-	-	-	Spore_YtfJ
ENBDON_01160	1240349.ANGC01000001_gene2463	3.84e-190	531.0	COG0583@1|root,COG0583@2|Bacteria,2GK13@201174|Actinobacteria,4FU13@85025|Nocardiaceae	201174|Actinobacteria	K	LysR substrate binding domain	-	-	-	-	-	-	-	-	-	-	-	-	HTH_1,LysR_substrate
ENBDON_01161	1240349.ANGC01000001_gene2464	2.03e-80	238.0	COG4319@1|root,COG4319@2|Bacteria,2IIFR@201174|Actinobacteria,4G1E3@85025|Nocardiaceae	201174|Actinobacteria	S	SnoaL-like domain	-	-	-	-	-	-	-	-	-	-	-	-	SnoaL_2
ENBDON_01162	1240349.ANGC01000001_gene2465	0.0	1534.0	COG0474@1|root,COG0474@2|Bacteria,2GJJC@201174|Actinobacteria,4FUYZ@85025|Nocardiaceae	201174|Actinobacteria	P	E1-E2 ATPase	ctpE	GO:0003674,GO:0003824,GO:0005215,GO:0005388,GO:0005575,GO:0005622,GO:0005623,GO:0005886,GO:0005887,GO:0006810,GO:0006811,GO:0006812,GO:0006816,GO:0008150,GO:0008324,GO:0015075,GO:0015085,GO:0015318,GO:0015399,GO:0015405,GO:0015662,GO:0016020,GO:0016021,GO:0016462,GO:0016787,GO:0016817,GO:0016818,GO:0016887,GO:0017111,GO:0019829,GO:0022804,GO:0022853,GO:0022857,GO:0022890,GO:0030001,GO:0031224,GO:…	-	ko:K12952	-	-	-	-	ko00000,ko01000	3.A.3.23	-	-	E1-E2_ATPase,Hydrolase
ENBDON_01163	1429046.RR21198_1431	4.3e-40	134.0	2EJAX@1|root,33D21@2|Bacteria,2GWPN@201174|Actinobacteria	201174|Actinobacteria	S	MT0933-like antitoxin protein	-	-	-	-	-	-	-	-	-	-	-	-	MT0933_antitox
ENBDON_01164	1429046.RR21198_1430	9.08e-39	130.0	2EJAX@1|root,33D21@2|Bacteria,2GWPN@201174|Actinobacteria	201174|Actinobacteria	S	MT0933-like antitoxin protein	-	-	-	-	-	-	-	-	-	-	-	-	MT0933_antitox
ENBDON_01165	1429046.RR21198_1427	3.01e-146	413.0	COG1309@1|root,COG1309@2|Bacteria,2IDV2@201174|Actinobacteria,4FYD0@85025|Nocardiaceae	201174|Actinobacteria	K	transcriptional regulator	-	-	-	-	-	-	-	-	-	-	-	-	TetR_N
ENBDON_01166	1429046.RR21198_1426	2.71e-157	443.0	COG1024@1|root,COG1024@2|Bacteria,2GJW5@201174|Actinobacteria,4FX84@85025|Nocardiaceae	201174|Actinobacteria	I	Enoyl-CoA hydratase/isomerase	-	-	-	-	-	-	-	-	-	-	-	-	ECH_1
ENBDON_01167	1429046.RR21198_1425	2.58e-147	416.0	COG1309@1|root,COG1309@2|Bacteria,2IDV2@201174|Actinobacteria,4FYD0@85025|Nocardiaceae	201174|Actinobacteria	K	transcriptional regulator	-	-	-	-	-	-	-	-	-	-	-	-	TetR_N
ENBDON_01168	1429046.RR21198_1424	1.01e-273	749.0	COG1960@1|root,COG1960@2|Bacteria,2GM3V@201174|Actinobacteria,4FY8U@85025|Nocardiaceae	201174|Actinobacteria	I	Acyl-CoA dehydrogenase, C-terminal domain	-	-	1.3.8.7,1.3.8.8	ko:K00249,ko:K00255	ko00071,ko00280,ko00410,ko00640,ko01100,ko01110,ko01130,ko01200,ko01212,ko03320,map00071,map00280,map00410,map00640,map01100,map01110,map01130,map01200,map01212,map03320	M00013,M00036,M00087	R00924,R01175,R01279,R02661,R03172,R03777,R03857,R03990,R04095,R04432,R04751,R04754	RC00052,RC00068,RC00076,RC00095,RC00148,RC00246	ko00000,ko00001,ko00002,ko01000	-	-	-	Acyl-CoA_dh_1,Acyl-CoA_dh_M,Acyl-CoA_dh_N
ENBDON_01169	1429046.RR21198_1423	9.15e-284	775.0	COG1960@1|root,COG1960@2|Bacteria,2GIX8@201174|Actinobacteria,4FXI1@85025|Nocardiaceae	201174|Actinobacteria	I	acyl-CoA dehydrogenase	fadE7	-	1.3.8.6	ko:K00252	ko00071,ko00310,ko00362,ko00380,ko01100,ko01120,ko01130,map00071,map00310,map00362,map00380,map01100,map01120,map01130	M00032	R02487,R02488,R10074	RC00052,RC00156	ko00000,ko00001,ko00002,ko01000	-	-	-	Acyl-CoA_dh_1,Acyl-CoA_dh_M,Acyl-CoA_dh_N
ENBDON_01170	1429046.RR21198_1422	0.0	1084.0	COG0318@1|root,COG0318@2|Bacteria,2GIUC@201174|Actinobacteria,4FV41@85025|Nocardiaceae	201174|Actinobacteria	IQ	AMP-binding enzyme C-terminal domain	-	-	6.2.1.3	ko:K00666,ko:K01897	ko00061,ko00071,ko01100,ko01212,ko02024,ko03320,ko04146,ko04216,ko04714,ko04920,map00061,map00071,map01100,map01212,map02024,map03320,map04146,map04216,map04714,map04920	M00086	R01280	RC00004,RC00014	ko00000,ko00001,ko00002,ko01000,ko01004,ko04147	4.C.1.1	-	-	AMP-binding,AMP-binding_C
ENBDON_01171	1429046.RR21198_1421	3.63e-163	457.0	COG1028@1|root,COG1028@2|Bacteria,2GJW1@201174|Actinobacteria,4FXGT@85025|Nocardiaceae	201174|Actinobacteria	IQ	KR domain	-	-	1.1.1.100	ko:K00059,ko:K07535	ko00061,ko00333,ko00362,ko00780,ko01040,ko01100,ko01120,ko01130,ko01212,ko01220,map00061,map00333,map00362,map00780,map01040,map01100,map01120,map01130,map01212,map01220	M00083,M00540,M00572	R04533,R04534,R04536,R04543,R04566,R04953,R04964,R05582,R07759,R07763,R10116,R10120,R11671	RC00029,RC00117,RC00154	ko00000,ko00001,ko00002,ko01000,ko01004	-	-	-	adh_short_C2
ENBDON_01172	1429046.RR21198_1420	1.34e-189	526.0	COG0447@1|root,COG0447@2|Bacteria,2GK5G@201174|Actinobacteria,4FYJ8@85025|Nocardiaceae	201174|Actinobacteria	H	Belongs to the enoyl-CoA hydratase isomerase family. MenB subfamily	menB	-	4.1.3.36	ko:K01661	ko00130,ko01100,ko01110,map00130,map01100,map01110	M00116	R07263	RC01923	ko00000,ko00001,ko00002,ko01000	-	-	-	ECH_1
ENBDON_01174	1429046.RR21198_1417	2.46e-306	837.0	COG0477@1|root,COG2814@2|Bacteria,2GM2G@201174|Actinobacteria,4FXUX@85025|Nocardiaceae	201174|Actinobacteria	EGP	Protein involved in sugar porter activity, transport and response to antibiotic	-	-	-	ko:K05548	-	-	-	-	ko00000,ko02000	2.A.1.15	-	-	MFS_1,MFS_4,Sugar_tr
ENBDON_01175	1429046.RR21198_1416	5.64e-276	754.0	COG1960@1|root,COG1960@2|Bacteria,2GIX8@201174|Actinobacteria,4FWEK@85025|Nocardiaceae	201174|Actinobacteria	I	acyl-CoA dehydrogenase	mmgC	-	-	-	-	-	-	-	-	-	-	-	Acyl-CoA_dh_1,Acyl-CoA_dh_M,Acyl-CoA_dh_N
ENBDON_01176	1240349.ANGC01000001_gene2470	0.0	968.0	COG0025@1|root,COG0025@2|Bacteria,2GIUT@201174|Actinobacteria,4FWFN@85025|Nocardiaceae	201174|Actinobacteria	P	Sodium/hydrogen exchanger family	-	-	-	ko:K03316	-	-	-	-	ko00000	2.A.36	-	-	Na_H_Exchanger
ENBDON_01177	1240349.ANGC01000001_gene2471	1.46e-112	323.0	arCOG10217@1|root,301DU@2|Bacteria,2H5HY@201174|Actinobacteria	201174|Actinobacteria	S	Domain of unknown function (DUF4385)	-	-	-	-	-	-	-	-	-	-	-	-	DUF4385
ENBDON_01178	1240349.ANGC01000001_gene2472	3.77e-271	744.0	COG3275@1|root,COG3275@2|Bacteria,2GJD4@201174|Actinobacteria,4FVHA@85025|Nocardiaceae	201174|Actinobacteria	T	Histidine kinase	-	-	2.7.13.3	ko:K02478	-	-	-	-	ko00000,ko01000,ko01001,ko02022	-	-	-	HATPase_c,His_kinase
ENBDON_01179	1240349.ANGC01000001_gene2473	7.05e-177	494.0	COG3279@1|root,COG3279@2|Bacteria,2GKK5@201174|Actinobacteria,4FWHV@85025|Nocardiaceae	201174|Actinobacteria	T	response regulator	-	-	-	-	-	-	-	-	-	-	-	-	LytTR,Response_reg
ENBDON_01180	1240349.ANGC01000001_gene2474	6.6e-67	205.0	2E3NY@1|root,32YM2@2|Bacteria,2II83@201174|Actinobacteria,4G2AP@85025|Nocardiaceae	201174|Actinobacteria	-	-	-	-	-	-	-	-	-	-	-	-	-	-	-
ENBDON_01181	1240349.ANGC01000001_gene2475	0.0	1078.0	COG4147@1|root,COG4147@2|Bacteria,2GM3H@201174|Actinobacteria,4FW3C@85025|Nocardiaceae	201174|Actinobacteria	S	Belongs to the sodium solute symporter (SSF) (TC 2.A.21) family	-	-	-	-	-	-	-	-	-	-	-	-	SSF
ENBDON_01182	1240349.ANGC01000001_gene2476	2.47e-76	228.0	COG3162@1|root,COG3162@2|Bacteria,2IQ5D@201174|Actinobacteria,4G28A@85025|Nocardiaceae	201174|Actinobacteria	S	Protein of unknown function, DUF485	-	-	-	-	-	-	-	-	-	-	-	-	DUF485
ENBDON_01183	1429046.RR21198_1406	0.0	972.0	COG4147@1|root,COG4147@2|Bacteria,2GJ56@201174|Actinobacteria,4FYEB@85025|Nocardiaceae	201174|Actinobacteria	S	Belongs to the sodium solute symporter (SSF) (TC 2.A.21) family	actP	-	-	ko:K14393	-	-	-	-	ko00000,ko02000	2.A.21.7	-	-	SSF
ENBDON_01184	1429046.RR21198_1405	3.13e-99	288.0	COG3427@1|root,COG3427@2|Bacteria,2IJF7@201174|Actinobacteria,4G1KP@85025|Nocardiaceae	201174|Actinobacteria	S	Polyketide cyclase / dehydrase and lipid transport	-	GO:0005575,GO:0005623,GO:0005886,GO:0016020,GO:0044464,GO:0071944	-	-	-	-	-	-	-	-	-	-	Polyketide_cyc2
ENBDON_01185	1240349.ANGC01000001_gene2479	0.0	1511.0	COG1793@1|root,COG3285@1|root,COG1793@2|Bacteria,COG3285@2|Bacteria,2GJPX@201174|Actinobacteria,4FVM6@85025|Nocardiaceae	201174|Actinobacteria	L	DNA polymerase Ligase (LigD)	ligD	GO:0000166,GO:0000287,GO:0000726,GO:0003674,GO:0003676,GO:0003677,GO:0003824,GO:0003887,GO:0003896,GO:0003899,GO:0003909,GO:0003910,GO:0004518,GO:0004527,GO:0004529,GO:0004536,GO:0004652,GO:0005488,GO:0005524,GO:0005575,GO:0005623,GO:0005886,GO:0006139,GO:0006259,GO:0006260,GO:0006261,GO:0006266,GO:0006269,GO:0006281,GO:0006302,GO:0006303,GO:0006725,GO:0006807,GO:0006950,GO:0006974,GO:0008144,GO:…	6.5.1.1,6.5.1.6,6.5.1.7	ko:K01971,ko:K10747	ko03030,ko03410,ko03420,ko03430,ko03450,map03030,map03410,map03420,map03430,map03450	-	R00381,R00382,R10822,R10823	RC00005	ko00000,ko00001,ko01000,ko03032,ko03400	-	-	-	DNA_ligase_A_C,DNA_ligase_A_M,LigD_N
ENBDON_01186	1240349.ANGC01000001_gene2480	3.56e-145	411.0	COG0789@1|root,COG0789@2|Bacteria,2HDU8@201174|Actinobacteria,4FXDB@85025|Nocardiaceae	201174|Actinobacteria	K	helix_turn_helix, mercury resistance	-	-	-	-	-	-	-	-	-	-	-	-	MerR,MerR_1
ENBDON_01187	1240349.ANGC01000001_gene2481	2.28e-261	719.0	COG2312@1|root,COG2312@2|Bacteria,2GUAJ@201174|Actinobacteria,4FTWP@85025|Nocardiaceae	201174|Actinobacteria	S	Erythromycin esterase	-	-	-	-	-	-	-	-	-	-	-	-	Erythro_esteras
ENBDON_01188	1429046.RR21198_1403	4.46e-179	499.0	COG2020@1|root,COG2020@2|Bacteria,2GN9N@201174|Actinobacteria,4FZCX@85025|Nocardiaceae	201174|Actinobacteria	O	NnrU protein	-	-	2.1.1.334	ko:K21310	ko00920,map00920	-	R11546	RC02653	ko00000,ko00001,ko01000	-	-	-	NnrU
ENBDON_01189	1240349.ANGC01000001_gene2483	6.11e-74	221.0	COG1742@1|root,COG1742@2|Bacteria,2IKM8@201174|Actinobacteria,4G23W@85025|Nocardiaceae	201174|Actinobacteria	S	Uncharacterised BCR, YnfA/UPF0060 family	-	-	-	ko:K09771	-	-	-	-	ko00000,ko02000	2.A.7.26	-	-	UPF0060
ENBDON_01190	1240349.ANGC01000001_gene2484	6.92e-96	280.0	2AP16@1|root,32BES@2|Bacteria,2HHZ5@201174|Actinobacteria,4G1TS@85025|Nocardiaceae	201174|Actinobacteria	-	-	-	-	-	-	-	-	-	-	-	-	-	-	-
ENBDON_01191	1240349.ANGC01000001_gene2485	9.39e-170	475.0	COG3618@1|root,COG3618@2|Bacteria,2I2D4@201174|Actinobacteria,4G9DC@85025|Nocardiaceae	201174|Actinobacteria	S	Amidohydrolase	-	-	-	-	-	-	-	-	-	-	-	-	Amidohydro_2
ENBDON_01192	1240349.ANGC01000001_gene2486	1.78e-301	823.0	COG1304@1|root,COG1304@2|Bacteria,2GJA5@201174|Actinobacteria,4FU3F@85025|Nocardiaceae	201174|Actinobacteria	C	FMN-dependent dehydrogenase	-	-	1.1.2.3,1.13.12.4	ko:K00101,ko:K00467	ko00620,ko01100,map00620,map01100	-	R00196,R00319	RC00044,RC01312	ko00000,ko00001,ko01000	-	-	-	FMN_dh
ENBDON_01193	1240349.ANGC01000001_gene2487	1.99e-68	207.0	COG0607@1|root,COG0607@2|Bacteria,2HI97@201174|Actinobacteria,4G3D4@85025|Nocardiaceae	201174|Actinobacteria	P	Rhodanese Homology Domain	-	-	-	-	-	-	-	-	-	-	-	-	Rhodanese
ENBDON_01195	1429046.RR21198_1396	1.19e-57	179.0	COG1937@1|root,COG1937@2|Bacteria,2IQ7U@201174|Actinobacteria,4G32F@85025|Nocardiaceae	201174|Actinobacteria	S	Metal-sensitive transcriptional repressor	-	-	-	-	-	-	-	-	-	-	-	-	Trns_repr_metal
ENBDON_01196	1240349.ANGC01000001_gene2490	5.17e-86	253.0	COG3439@1|root,COG3439@2|Bacteria,2IKVF@201174|Actinobacteria,4G245@85025|Nocardiaceae	201174|Actinobacteria	S	Domain of unknown function DUF302	-	-	-	-	-	-	-	-	-	-	-	-	DUF302
ENBDON_01197	1240349.ANGC01000001_gene2491	1.58e-151	428.0	COG0036@1|root,COG0036@2|Bacteria,2GJZ9@201174|Actinobacteria,4G6JD@85025|Nocardiaceae	201174|Actinobacteria	G	Ribulose-phosphate 3 epimerase family	rpe	-	5.1.3.1	ko:K01783	ko00030,ko00040,ko00710,ko01100,ko01110,ko01120,ko01130,ko01200,ko01230,map00030,map00040,map00710,map01100,map01110,map01120,map01130,map01200,map01230	M00004,M00007	R01529	RC00540	ko00000,ko00001,ko00002,ko01000	-	-	-	Ribul_P_3_epim
ENBDON_01198	1240349.ANGC01000001_gene2492	2.28e-143	407.0	COG0542@1|root,COG0542@2|Bacteria,2GKKF@201174|Actinobacteria,4FWE1@85025|Nocardiaceae	201174|Actinobacteria	O	Clp amino terminal domain, pathogenicity island component	clpC2	GO:0005575,GO:0005622,GO:0005623,GO:0005737,GO:0005829,GO:0044424,GO:0044444,GO:0044464	-	-	-	-	-	-	-	-	-	-	Clp_N
ENBDON_01199	1429046.RR21198_1392	4.11e-27	106.0	2BGG3@1|root,32AE1@2|Bacteria,2HB6E@201174|Actinobacteria,4G4V3@85025|Nocardiaceae	201174|Actinobacteria	-	-	-	-	-	-	-	-	-	-	-	-	-	-	-
ENBDON_01200	1240349.ANGC01000001_gene2494	1.75e-102	298.0	2DMMA@1|root,32SDH@2|Bacteria,2IM8C@201174|Actinobacteria,4G4IY@85025|Nocardiaceae	201174|Actinobacteria	-	-	-	-	-	-	-	-	-	-	-	-	-	-	F420H2_quin_red
ENBDON_01202	1429046.RR21198_1377	2.97e-169	474.0	COG2321@1|root,COG2321@2|Bacteria,2GV3T@201174|Actinobacteria,4G55P@85025|Nocardiaceae	201174|Actinobacteria	S	Putative neutral zinc metallopeptidase	-	-	-	ko:K07054	-	-	-	-	ko00000	-	-	-	Zn_peptidase
ENBDON_01203	1429046.RR21198_1376	4.01e-196	543.0	COG4942@1|root,COG4942@2|Bacteria,2GP1Y@201174|Actinobacteria,4G9FP@85025|Nocardiaceae	201174|Actinobacteria	D	Peptidase family M23	-	-	-	ko:K21471	-	-	-	-	ko00000,ko01000,ko01002,ko01011	-	-	-	Peptidase_M23
ENBDON_01204	1240349.ANGC01000001_gene2497	0.0	1008.0	COG2170@1|root,COG2170@2|Bacteria,2GKCT@201174|Actinobacteria,4FYHU@85025|Nocardiaceae	201174|Actinobacteria	S	glutamate--cysteine ligase	-	-	-	-	-	-	-	-	-	-	-	-	GCS2
ENBDON_01205	1240349.ANGC01000001_gene2498	0.0	1289.0	COG2234@1|root,COG2234@2|Bacteria,2I9BM@201174|Actinobacteria,4FXYP@85025|Nocardiaceae	201174|Actinobacteria	S	Peptidase family M28	-	-	-	-	-	-	-	-	-	-	-	-	Peptidase_M28
ENBDON_01206	1240349.ANGC01000001_gene2499	3.4e-296	808.0	COG1017@1|root,COG1018@1|root,COG1017@2|Bacteria,COG1018@2|Bacteria,2GKXT@201174|Actinobacteria,4FUBV@85025|Nocardiaceae	201174|Actinobacteria	C	Belongs to the globin family	hmp	-	1.14.12.17	ko:K05916	ko05132,map05132	-	-	-	ko00000,ko00001,ko01000	-	-	-	FAD_binding_6,Globin,NAD_binding_1
ENBDON_01207	1240349.ANGC01000001_gene2500	1.48e-94	276.0	COG1959@1|root,COG1959@2|Bacteria,2IHTP@201174|Actinobacteria,4G17U@85025|Nocardiaceae	201174|Actinobacteria	K	Transcriptional regulator	nsrR	-	-	ko:K13771	ko05132,map05132	-	-	-	ko00000,ko00001,ko03000	-	-	-	Rrf2
ENBDON_01208	1240349.ANGC01000001_gene2501	5.95e-96	280.0	COG3448@1|root,COG3448@2|Bacteria	2|Bacteria	T	diguanylate cyclase activity	proV	-	3.6.3.32	ko:K02000,ko:K04767,ko:K05847,ko:K07168,ko:K09137	ko02010,map02010	M00208,M00209	-	-	ko00000,ko00001,ko00002,ko01000,ko02000	3.A.1.12	-	-	ABC_tran,CBS,DUF190,HPP
ENBDON_01209	1240349.ANGC01000001_gene2502	1.12e-220	609.0	COG0589@1|root,COG0589@2|Bacteria,2GMFE@201174|Actinobacteria,4FWS6@85025|Nocardiaceae	201174|Actinobacteria	T	universal stress protein	-	-	-	-	-	-	-	-	-	-	-	-	Usp
ENBDON_01210	1240349.ANGC01000001_gene2503	1.74e-250	687.0	COG2141@1|root,COG2141@2|Bacteria,2GIY3@201174|Actinobacteria,4FWE0@85025|Nocardiaceae	201174|Actinobacteria	C	Luciferase-like monooxygenase	-	-	-	-	-	-	-	-	-	-	-	-	Bac_luciferase
ENBDON_01211	1240349.ANGC01000001_gene2504	1.97e-200	556.0	COG0589@1|root,COG0589@2|Bacteria,2GMFE@201174|Actinobacteria,4FWRF@85025|Nocardiaceae	201174|Actinobacteria	T	Belongs to the universal stress protein A family	uspA1	-	-	-	-	-	-	-	-	-	-	-	Usp
ENBDON_01212	1429046.RR21198_1367	1.67e-45	148.0	2AQ0F@1|root,31F5E@2|Bacteria,2HIIG@201174|Actinobacteria,4G45Q@85025|Nocardiaceae	201174|Actinobacteria	-	-	-	-	-	-	-	-	-	-	-	-	-	-	-
ENBDON_01213	1240349.ANGC01000001_gene2506	1.55e-226	624.0	COG0208@1|root,COG0208@2|Bacteria,2GKGZ@201174|Actinobacteria,4FXYZ@85025|Nocardiaceae	201174|Actinobacteria	F	Fatty acid desaturase	desA1	GO:0005575,GO:0005618,GO:0005622,GO:0005623,GO:0005737,GO:0005829,GO:0005886,GO:0008150,GO:0009605,GO:0009607,GO:0016020,GO:0030312,GO:0040007,GO:0043207,GO:0044403,GO:0044419,GO:0044424,GO:0044444,GO:0044464,GO:0050896,GO:0051701,GO:0051704,GO:0051707,GO:0052173,GO:0052200,GO:0052564,GO:0052572,GO:0071944,GO:0075136	1.14.19.11,1.14.19.2,1.14.19.26	ko:K03921	ko00061,ko01040,ko01212,map00061,map01040,map01212	-	R03370,R08161,R11108,R11109	RC00917	ko00000,ko00001,ko01000,ko01004	-	-	-	FA_desaturase_2
ENBDON_01215	1240349.ANGC01000001_gene2507	3.49e-206	572.0	COG0778@1|root,COG0778@2|Bacteria,2IIQW@201174|Actinobacteria,4FZHG@85025|Nocardiaceae	201174|Actinobacteria	C	Nitroreductase family	-	-	-	-	-	-	-	-	-	-	-	-	Nitroreductase
ENBDON_01216	1429046.RR21198_1364	1.96e-138	392.0	COG2197@1|root,COG2197@2|Bacteria,2GK4B@201174|Actinobacteria,4FWBT@85025|Nocardiaceae	201174|Actinobacteria	T	COG2197 Response regulator containing a CheY-like receiver domain and an HTH DNA-binding domain	-	-	-	-	-	-	-	-	-	-	-	-	GerE,Response_reg
ENBDON_01217	1240349.ANGC01000001_gene2509	0.0	1007.0	COG2203@1|root,COG3850@1|root,COG2203@2|Bacteria,COG3850@2|Bacteria,2GIWI@201174|Actinobacteria,4FV4F@85025|Nocardiaceae	201174|Actinobacteria	T	Domain present in phytochromes and cGMP-specific phosphodiesterases.	-	-	-	-	-	-	-	-	-	-	-	-	GAF,GAF_2,HATPase_c,HisKA_3
ENBDON_01218	1240349.ANGC01000001_gene2510	3.55e-297	814.0	COG1488@1|root,COG1488@2|Bacteria,2GJAT@201174|Actinobacteria,4G6J9@85025|Nocardiaceae	201174|Actinobacteria	F	Catalyzes the synthesis of beta-nicotinate D- ribonucleotide from nicotinate and 5-phospho-D-ribose 1-phosphate at the expense of ATP	-	GO:0001666,GO:0003674,GO:0003824,GO:0004516,GO:0005575,GO:0005623,GO:0005886,GO:0006139,GO:0006725,GO:0006732,GO:0006733,GO:0006753,GO:0006793,GO:0006796,GO:0006807,GO:0006950,GO:0008150,GO:0008152,GO:0009058,GO:0009108,GO:0009117,GO:0009165,GO:0009435,GO:0009605,GO:0009607,GO:0009628,GO:0009987,GO:0016020,GO:0016740,GO:0016757,GO:0016763,GO:0016874,GO:0016879,GO:0018130,GO:0019359,GO:0019362,GO:…	6.3.4.21	ko:K00763	ko00760,ko01100,map00760,map01100	-	R01724	RC00033	ko00000,ko00001,ko01000	-	-	-	NAPRTase,QRPTase_C
ENBDON_01219	1240349.ANGC01000001_gene2511	9.93e-167	467.0	COG4340@1|root,COG4340@2|Bacteria,2I90Z@201174|Actinobacteria,4G0ZI@85025|Nocardiaceae	201174|Actinobacteria	S	2OG-Fe dioxygenase	-	-	-	-	-	-	-	-	-	-	-	-	2OG-Fe_Oxy_2
ENBDON_01220	1429046.RR21198_1360	2.65e-313	860.0	COG0477@1|root,COG0477@2|Bacteria,2I9AX@201174|Actinobacteria,4FWSA@85025|Nocardiaceae	201174|Actinobacteria	EGP	Major Facilitator Superfamily	-	-	-	-	-	-	-	-	-	-	-	-	MFS_1
ENBDON_01221	1240349.ANGC01000001_gene2513	1.07e-134	384.0	COG3571@1|root,COG3571@2|Bacteria,2GKKE@201174|Actinobacteria,4FUY8@85025|Nocardiaceae	201174|Actinobacteria	S	Hydrolase of the alpha beta-hydrolase	-	-	-	ko:K07020	-	-	-	-	ko00000	-	-	-	DLH
ENBDON_01222	1240349.ANGC01000001_gene2514	4.55e-243	669.0	COG1275@1|root,COG1275@2|Bacteria,2GK0D@201174|Actinobacteria,4FYXF@85025|Nocardiaceae	201174|Actinobacteria	P	Voltage-dependent anion channel	-	-	-	-	-	-	-	-	-	-	-	-	SLAC1
ENBDON_01223	1240349.ANGC01000001_gene2515	4.69e-202	560.0	COG0266@1|root,COG0266@2|Bacteria,2GKAM@201174|Actinobacteria,4FUDS@85025|Nocardiaceae	201174|Actinobacteria	L	Belongs to the FPG family	mutM1	-	3.2.2.23,4.2.99.18	ko:K10563	ko03410,map03410	-	-	-	ko00000,ko00001,ko01000,ko03400	-	-	-	Fapy_DNA_glyco,H2TH,zf-FPG_IleRS
ENBDON_01224	1240349.ANGC01000001_gene2516	1.36e-202	559.0	COG0207@1|root,COG0207@2|Bacteria,2GKY0@201174|Actinobacteria,4FVPC@85025|Nocardiaceae	201174|Actinobacteria	F	Catalyzes the reductive methylation of 2'-deoxyuridine- 5'-monophosphate (dUMP) to 2'-deoxythymidine-5'-monophosphate (dTMP) while utilizing 5,10-methylenetetrahydrofolate (mTHF) as the methyl donor and reductant in the reaction, yielding dihydrofolate (DHF) as a by-product. This enzymatic reaction provides an intracellular de novo source of dTMP, an essential precursor for DNA biosynthesis	thyA	GO:0003674,GO:0003824,GO:0004799,GO:0006139,GO:0006220,GO:0006221,GO:0006231,GO:0006244,GO:0006725,GO:0006753,GO:0006793,GO:0006796,GO:0006807,GO:0008150,GO:0008152,GO:0008168,GO:0009056,GO:0009058,GO:0009117,GO:0009123,GO:0009124,GO:0009125,GO:0009129,GO:0009130,GO:0009131,GO:0009157,GO:0009159,GO:0009162,GO:0009165,GO:0009166,GO:0009176,GO:0009177,GO:0009178,GO:0009219,GO:0009221,GO:0009223,GO:…	2.1.1.45	ko:K00560	ko00240,ko00670,ko01100,ko01523,map00240,map00670,map01100,map01523	M00053	R02101	RC00219,RC00332	ko00000,ko00001,ko00002,ko01000	-	-	-	Thymidylat_synt
ENBDON_01225	1240349.ANGC01000001_gene2517	1.87e-113	325.0	COG0262@1|root,COG0262@2|Bacteria,2IM1S@201174|Actinobacteria,4G19Q@85025|Nocardiaceae	201174|Actinobacteria	H	Key enzyme in folate metabolism. Catalyzes an essential reaction for de novo glycine and purine synthesis, and for DNA precursor synthesis	folA	GO:0000166,GO:0003674,GO:0003824,GO:0004146,GO:0005488,GO:0006082,GO:0006575,GO:0006725,GO:0006730,GO:0006732,GO:0006760,GO:0006807,GO:0008150,GO:0008152,GO:0009058,GO:0009108,GO:0009396,GO:0009987,GO:0016053,GO:0016491,GO:0016645,GO:0016646,GO:0018130,GO:0019438,GO:0019752,GO:0034641,GO:0036094,GO:0042398,GO:0042558,GO:0042559,GO:0043167,GO:0043168,GO:0043436,GO:0043603,GO:0043604,GO:0044237,GO:…	1.5.1.3	ko:K00287	ko00670,ko00790,ko01100,ko01523,map00670,map00790,map01100,map01523	M00126,M00840	R00936,R00937,R00939,R00940,R02235,R02236,R11765	RC00109,RC00110,RC00158	ko00000,ko00001,ko00002,ko01000	-	-	iNJ661.Rv2763c	DHFR_1
ENBDON_01226	1240349.ANGC01000001_gene2518	1.76e-68	207.0	COG1917@1|root,COG1917@2|Bacteria,2IQI4@201174|Actinobacteria,4G244@85025|Nocardiaceae	201174|Actinobacteria	S	conserved protein, contains double-stranded beta-helix domain	-	-	-	-	-	-	-	-	-	-	-	-	Cupin_2
ENBDON_01227	1240349.ANGC01000001_gene2519	0.0	997.0	COG2272@1|root,COG2272@2|Bacteria,2GJCN@201174|Actinobacteria,4FVVV@85025|Nocardiaceae	201174|Actinobacteria	I	Belongs to the type-B carboxylesterase lipase family	lipT	-	-	ko:K03929	-	-	-	-	ko00000,ko01000	-	CE10	-	COesterase
ENBDON_01228	1240349.ANGC01000001_gene2520	3.66e-288	788.0	COG1020@1|root,COG1020@2|Bacteria,2GN0Y@201174|Actinobacteria,4FW4H@85025|Nocardiaceae	201174|Actinobacteria	Q	D-alanine [D-alanyl carrier protein] ligase activity	-	-	-	-	-	-	-	-	-	-	-	-	-
ENBDON_01229	1240349.ANGC01000001_gene2521	2.47e-122	351.0	COG1309@1|root,COG1309@2|Bacteria,2I8DJ@201174|Actinobacteria,4FU7X@85025|Nocardiaceae	201174|Actinobacteria	K	Transcriptional regulator	-	-	-	-	-	-	-	-	-	-	-	-	TetR_N
ENBDON_01230	1240349.ANGC01000001_gene2522	0.0	1070.0	COG1960@1|root,COG1960@2|Bacteria,2GJHM@201174|Actinobacteria,4FUC1@85025|Nocardiaceae	201174|Actinobacteria	I	Acyl-CoA dehydrogenase, middle domain	aidB	-	-	ko:K09456	-	-	-	-	ko00000	-	-	-	Acyl-CoA_dh_1,Acyl-CoA_dh_M
ENBDON_01231	1429046.RR21198_1349	2.47e-169	476.0	COG1477@1|root,COG1477@2|Bacteria,2H74Y@201174|Actinobacteria,4FZ2W@85025|Nocardiaceae	201174|Actinobacteria	H	Flavin transferase that catalyzes the transfer of the FMN moiety of FAD and its covalent binding to the hydroxyl group of a threonine residue in a target flavoprotein	-	-	2.7.1.180	ko:K03734	-	-	-	-	ko00000,ko01000	-	-	-	ApbE
ENBDON_01232	1240349.ANGC01000001_gene2524	0.0	1040.0	COG0166@1|root,COG0166@2|Bacteria,2GJG0@201174|Actinobacteria,4FVB5@85025|Nocardiaceae	201174|Actinobacteria	G	Belongs to the GPI family	pgi	-	5.3.1.9	ko:K01810	ko00010,ko00030,ko00500,ko00520,ko01100,ko01110,ko01120,ko01130,ko01200,map00010,map00030,map00500,map00520,map01100,map01110,map01120,map01130,map01200	M00001,M00004,M00114	R02739,R02740,R03321	RC00376,RC00563	ko00000,ko00001,ko00002,ko01000,ko04147	-	-	-	PGI
ENBDON_01233	1240349.ANGC01000001_gene2525	0.0	926.0	COG1012@1|root,COG1012@2|Bacteria,2GIWZ@201174|Actinobacteria,4FTYW@85025|Nocardiaceae	201174|Actinobacteria	C	Belongs to the aldehyde dehydrogenase family	gabD4	-	1.2.1.16,1.2.1.20,1.2.1.79	ko:K00135	ko00250,ko00310,ko00350,ko00650,ko00760,ko01100,ko01120,map00250,map00310,map00350,map00650,map00760,map01100,map01120	M00027	R00713,R00714,R02401	RC00080	ko00000,ko00001,ko00002,ko01000	-	-	-	Aldedh
ENBDON_01234	1240349.ANGC01000001_gene2526	4.83e-61	188.0	COG1605@1|root,COG1605@2|Bacteria,2IQ8K@201174|Actinobacteria,4G275@85025|Nocardiaceae	201174|Actinobacteria	E	Chorismate mutase type II	-	-	5.4.99.5	ko:K04093	ko00400,ko01100,ko01110,ko01130,ko01230,map00400,map01100,map01110,map01130,map01230	M00024,M00025	R01715	RC03116	ko00000,ko00001,ko00002,ko01000	-	-	-	CM_2
ENBDON_01235	1240349.ANGC01000001_gene2527	0.0	1486.0	COG0210@1|root,COG0210@2|Bacteria,2GISS@201174|Actinobacteria,4FV6X@85025|Nocardiaceae	201174|Actinobacteria	L	UvrD-like helicase C-terminal domain	pcrA	GO:0000018,GO:0000166,GO:0000287,GO:0003674,GO:0003678,GO:0003824,GO:0004003,GO:0004386,GO:0005488,GO:0005575,GO:0005618,GO:0005622,GO:0005623,GO:0005886,GO:0006139,GO:0006259,GO:0006281,GO:0006302,GO:0006725,GO:0006807,GO:0006950,GO:0006974,GO:0006996,GO:0008026,GO:0008094,GO:0008150,GO:0008152,GO:0009314,GO:0009411,GO:0009416,GO:0009628,GO:0009650,GO:0009892,GO:0009987,GO:0010605,GO:0016020,GO:…	3.6.4.12	ko:K03657	ko03420,ko03430,map03420,map03430	-	-	-	ko00000,ko00001,ko01000,ko03400	-	-	-	UvrD-helicase,UvrD_C
ENBDON_01236	1240349.ANGC01000001_gene2528	1.22e-229	634.0	COG0739@1|root,COG0739@2|Bacteria,2GM7Q@201174|Actinobacteria,4FVHR@85025|Nocardiaceae	201174|Actinobacteria	M	Peptidase family M23	mepA	-	-	ko:K21471	-	-	-	-	ko00000,ko01000,ko01002,ko01011	-	-	-	Peptidase_M23
ENBDON_01237	1240349.ANGC01000001_gene2529	9.31e-249	700.0	2EB7B@1|root,3357X@2|Bacteria,2IE26@201174|Actinobacteria,4FWJA@85025|Nocardiaceae	201174|Actinobacteria	-	-	-	-	-	-	-	-	-	-	-	-	-	-	-
[truncated: 3,846 more rows]
