# Supplementary material for: Whole Genome of Petroleum Hydrocarbon Degrading Rhodococcus indonesiensis isolated from Nacharam, Hyderabad, India
Source: Research Square preprint supplement (doi:10.21203/rs.3.rs-6309542/v1), 2025-09-26
Supplement: Supplementary file 8 [file 63776467659ce76922327152.xlsx]

## Sheet: Sheet1
#Sequence Id	Type	Start	Stop	Strand	Locus Tag	Score	Evalue	Query Cov	Subject Cov	Id	Accession
contig_1	cds	1	1647	+	ENBDON_00001	971	0	1.009	0.97	0.931	UniRef:UniRef90_A0A098BQE3
contig_1	cds	2200	3369	+	ENBDON_00002	705	1.5e-254	1	0.855	0.992	UniRef:UniRef90_A0A059MK77
contig_1	cds	3394	4647	+	ENBDON_00003	774	8.5e-282	1	1	0.966	UniRef:UniRef90_A0A098BMJ5
contig_1	cds	4644	5192	+	ENBDON_00004	-	0	1	1	1	UniRef:UniRef100_A0A0M8PJX7
contig_1	cds	5281	6171	+	ENBDON_00005	-	0	1	1	1	UniRef:UniRef100_A0A0M8PMP5
contig_1	cds	6168	7256	+	ENBDON_00006	707	3.9e-257	1	1	0.961	UniRef:UniRef90_A0A098BNX6
contig_1	cds	7266	8168	+	ENBDON_00007	595	7.1e-215	1	1	0.96	UniRef:UniRef90_A0A5M3YIX3
contig_1	cds	8347	10380	+	ENBDON_00008	-	0	1	1	1	UniRef:UniRef100_A0A0M8PT76
contig_1	cds	13737	14153	+	ENBDON_00009	-	0	1	1	1	UniRef:UniRef100_A0A098BNY1
contig_1	cds	14167	14541	+	ENBDON_00010	-	0	1	1	1	UniRef:UniRef100_A0A098BMN1
contig_1	cds	14522	15109	+	ENBDON_00011	-	0	1	1	1	UniRef:UniRef100_A0A098BMK6
contig_1	cds	15109	15945	+	ENBDON_00012	-	0	1	1	1	UniRef:UniRef100_UPI000593B7F6
contig_1	cds	16100	16918	+	ENBDON_00013	516	2.9e-184	1	0.877	0.974	UniRef:UniRef90_M2ZAR0
contig_1	cds	17069	20854	+	ENBDON_00014	2421	0	1	1	0.987	UniRef:UniRef90_A0A098BMN6
contig_1	cds	20855	21988	+	ENBDON_00015	403	1.3e-136	1.029	1	0.856	UniRef:UniRef90_A0A098BML0
contig_1	tRNA	22064	22137	+	ENBDON_00016	77.9	-	-	-	-	-
contig_1	cds	22164	22265	+	ENBDON_00017	46.2	4.2e-06	1	0.917	0.636	UniRef:UniRef90_V9XN55
contig_1	tRNA	22276	22348	+	ENBDON_00018	79.9	-	-	-	-	-
contig_1	cds	22407	22859	-	ENBDON_00019	270	1.7e-91	1	1	0.967	UniRef:UniRef90_UPI0025A1FE55
contig_1	cds	22856	23467	-	ENBDON_00020	-	0	1	1	1	UniRef:UniRef100_A0A0M9WQT4
contig_1	cds	23646	24146	+	ENBDON_00021	295	1.4e-100	1	1	0.982	UniRef:UniRef90_A0A098BNZ1
contig_1	cds	24226	24735	+	ENBDON_00022	-	0	1	1	1	UniRef:UniRef100_M2XTX3
contig_1	cds	24728	25912	+	ENBDON_00023	759	1.2e-276	1	1	0.947	UniRef:UniRef90_A0A098BML6
contig_1	cds	26061	27020	+	ENBDON_00024	639	6.4e-232	0.991	0.991	0.975	UniRef:UniRef90_A0A098BNW0
contig_1	cds	27030	28211	-	ENBDON_00025	603	4.8e-215	0.875	0.864	0.927	UniRef:UniRef90_A0A842H3U5
contig_1	cds	28405	29085	-	ENBDON_00026	394	6.2e-138	1	1	0.903	UniRef:UniRef90_A0A098BNZ6
contig_1	cds	29259	30557	+	ENBDON_00027	809	4e-295	0.977	0.972	0.967	UniRef:UniRef90_A0A5M3YIY6
contig_1	cds	30628	32571	-	ENBDON_00028	1125	0	1	1	0.862	UniRef:UniRef90_A0A098BML9
contig_1	cds	32807	32974	+	ENBDON_00029	99.4	1.4e-26	0.982	0.982	0.981	UniRef:UniRef90_UPI00034B5BEC
contig_1	cds	32988	33842	-	ENBDON_00030	281	3.1e-91	1.077	1	0.742	UniRef:UniRef90_UPI0025A24CAD
contig_1	cds	34034	34504	+	ENBDON_00031	313	7.8e-108	1	0.812	0.981	UniRef:UniRef90_A0A098BP02
contig_1	cds	34516	35442	+	ENBDON_00032	-	0	1	1	1	UniRef:UniRef100_A0A0M9WQS2
contig_1	cds	35427	35879	-	ENBDON_00033	272	5.7e-92	1	0.943	0.947	UniRef:UniRef90_A0A098BNW8
contig_1	cds	35946	36209	-	ENBDON_00034	-	0	1	1	1	UniRef:UniRef100_A0A098BQH6
contig_1	cds	36339	37064	+	ENBDON_00035	-	0	1	1	1	UniRef:UniRef100_UPI0025A13D6D
contig_1	cds	37085	37741	+	ENBDON_00036	-	0	1	1	1	UniRef:UniRef100_M2ZUJ2
contig_1	cds	37769	39682	-	ENBDON_00037	-	0	1	1	1	UniRef:UniRef100_UPI0025A12ED3
contig_1	cds	39679	41196	-	ENBDON_00038	767	3.2e-276	1.006	1	0.982	UniRef:UniRef90_A0A098BQI1
contig_1	cds	41199	42683	-	ENBDON_00039	921	0	1	1	0.972	UniRef:UniRef90_N1M9U3
contig_1	cds	42680	44131	-	ENBDON_00040	-	0	1	1	1	UniRef:UniRef100_A0A0M8PJZ6
contig_1	cds	44131	45567	-	ENBDON_00041	686	4e-245	1.01	1	0.919	UniRef:UniRef90_A0A098BMN4
contig_1	cds	45564	46028	-	ENBDON_00042	-	0	1	1	1	UniRef:UniRef100_A0A0M8PKF6
contig_1	cds	46189	47472	-	ENBDON_00043	718	6.5e-259	1	0.918	0.974	UniRef:UniRef90_M2XTV1
contig_1	tRNA	47661	47746	+	ENBDON_00044	73.2	-	-	-	-	-
contig_1	cds	47812	48132	-	ENBDON_00045	-	0	1	1	1	UniRef:UniRef100_A0A0M8PT94
contig_1	cds	48620	50266	-	ENBDON_00046	1017	0	1	1	0.945	UniRef:UniRef90_A0A098BMR4
contig_1	cds	50405	51433	-	ENBDON_00047	621	7.9e-224	0.997	0.997	0.953	UniRef:UniRef90_A0A098BMP0
contig_1	cds	51489	52040	+	ENBDON_00048	-	0	1	1	1	UniRef:UniRef100_M2ZAN0
contig_1	cds	52361	56956	+	ENBDON_00049	2987	0	1	1	0.98	UniRef:UniRef90_A0A098BQJ3
contig_1	cds	56949	58400	+	ENBDON_00050	902	0	1	0.982	0.913	UniRef:UniRef90_V9XIH2
contig_1	cds	58523	59332	+	ENBDON_00051	283	1.3e-92	0.933	0.933	0.92	UniRef:UniRef90_M2ZVM1
contig_1	cds	59427	60338	+	ENBDON_00052	548	2.6e-196	0.993	0.99	0.934	UniRef:UniRef90_M2ZUH7
contig_1	cds	60346	60807	-	ENBDON_00053	280	5.5e-95	0.974	0.837	0.96	UniRef:UniRef90_A0A098BNY8
contig_1	cds	60993	61907	-	ENBDON_00054	575	4.5e-207	1	0.99	0.974	UniRef:UniRef90_N1MDH4
contig_1	cds	61970	62263	+	ENBDON_00055	-	0	1	1	1	UniRef:UniRef100_A0A0M8PTA0
contig_1	cds	62588	62743	-	ENBDON_00056	-	0	1	1	1	UniRef:UniRef100_A0A098BQK3
contig_1	cds	62870	63214	-	ENBDON_00057	-	0	1	1	1	UniRef:UniRef100_A0A0M8PSB7
contig_1	cds	63397	63996	-	ENBDON_00058	359	9.7e-125	1	0.892	0.915	UniRef:UniRef90_A0A385HFL6
contig_1	cds	64064	67363	-	ENBDON_00059	2063	0	1	1	0.947	UniRef:UniRef90_A0A098BMQ6
contig_1	cds	67602	68900	+	ENBDON_00060	766	3.3e-278	1	0.973	0.958	UniRef:UniRef90_A0A098BQL3
contig_1	cds	68971	69324	-	ENBDON_00061	-	0	1	1	1	UniRef:UniRef100_A0A0M8PTA6
contig_1	cds	69430	71502	-	ENBDON_00062	1145	0	0.996	0.996	0.936	UniRef:UniRef90_A0A098BMR8
contig_1	cds	71577	71996	+	ENBDON_00063	-	0	1	1	1	UniRef:UniRef100_A0A0M9WQT2
contig_1	cds	72129	72872	-	ENBDON_00064	-	0	1	1	1	UniRef:UniRef100_UPI0025A2402D
contig_1	cds	72862	73437	-	ENBDON_00065	-	0	1	1	1	UniRef:UniRef100_A0A0M8PRN1
contig_1	cds	73603	74232	-	ENBDON_00066	-	0	1	1	1	UniRef:UniRef100_UPI0025A0AA38
contig_1	cds	74380	75057	+	ENBDON_00067	-	0	1	1	1	UniRef:UniRef100_UPI0025A146F8
contig_1	cds	75081	75662	+	ENBDON_00068	-	0	1	1	1	UniRef:UniRef100_M2ZUF4
contig_1	cds	75890	77749	+	ENBDON_00069	-	0	1	1	1	UniRef:UniRef100_A0A0N0S1B4
contig_1	cds	77801	79345	-	ENBDON_00070	1023	0	1	1	0.99	UniRef:UniRef90_A0A098BP18
contig_1	cds	79342	80706	-	ENBDON_00071	903	0	1	1	0.991	UniRef:UniRef90_UPI0025A185C2
contig_1	cds	80777	80866	-	ENBDON_00072	41.6	0.00022	1	0.967	0.621	UniRef:UniRef90_A0A2X4UFP2
contig_1	cds	80947	82311	-	ENBDON_00073	-	0	1	1	1	UniRef:UniRef100_UPI0019341E3D
contig_1	cds	82380	82604	+	ENBDON_00074	-	0	1	1	1	UniRef:UniRef100_A0A0M8PSC8
contig_1	cds	82608	83909	-	ENBDON_00075	717	2.8e-259	0.961	0.998	0.978	UniRef:UniRef90_M2ZAJ6
contig_1	cds	83979	84185	-	ENBDON_00076	73.9	3.9e-16	1	1	0.985	UniRef:UniRef90_M2XTR7
contig_1	cds	84260	84664	-	ENBDON_00077	-	0	1	1	1	UniRef:UniRef100_M2YQW7
contig_1	cds	84761	85285	-	ENBDON_00078	335	3.6e-116	1	1	0.948	UniRef:UniRef90_A0A098BMV7
contig_1	cds	85298	85792	-	ENBDON_00079	-	0	1	1	1	UniRef:UniRef100_A0A0M9WQU3
contig_1	cds	85939	86691	+	ENBDON_00080	-	0	1	1	1	UniRef:UniRef100_A0A0M8PK22
contig_1	cds	86811	87188	-	ENBDON_00081	-	0	1	1	1	UniRef:UniRef100_A0A0M8PMU0
contig_1	cds	87208	89046	-	ENBDON_00082	1197	0	1	1	0.975	UniRef:UniRef90_N1M2Y7
contig_1	cds	89119	89367	-	ENBDON_00083	150	4.5e-46	1	1	0.976	UniRef:UniRef90_UPI001267CF2F
contig_1	cds	89506	90672	+	ENBDON_00084	698	9.3e-253	1	1	0.894	UniRef:UniRef90_A0A9Q1P0I9
contig_1	cds	90677	91702	+	ENBDON_00085	560	1.2e-199	0.997	0.997	0.818	UniRef:UniRef90_A0A0M9WQB7
contig_1	cds	91933	92751	+	ENBDON_00086	546	9.2e-197	1	1	0.952	UniRef:UniRef90_UPI0013EC3443
contig_1	cds	92951	93307	-	ENBDON_00087	233	6.9e-78	1	1	0.932	UniRef:UniRef90_UPI0009350D43
contig_1	cds	93516	93950	+	ENBDON_00088	258	5.8e-87	1	1	0.958	UniRef:UniRef90_A0A097SPI4
contig_1	cds	93952	94503	+	ENBDON_00089	354	2.4e-123	1	0.901	0.973	UniRef:UniRef90_A0A379LVS2
contig_1	cds	94981	95340	+	ENBDON_00090	-	0	1	1	1	UniRef:UniRef100_A0A1J0TQ62
contig_1	cds	95337	95789	+	ENBDON_00091	-	0	1	1	1	UniRef:UniRef100_A0A385HRA8
contig_1	cds	95708	96163	-	ENBDON_00092	-	-	-	-	-	-
contig_1	cds	96213	97256	-	ENBDON_00093	535	1e-189	0.997	1	0.775	UniRef:UniRef90_UPI0011115921
contig_1	cds	97253	98407	-	ENBDON_00094	701	5.7e-254	1	1.003	0.878	UniRef:UniRef90_UPI001F20A109
contig_1	cds	98422	99789	-	ENBDON_00095	885	0	1	1	0.923	UniRef:UniRef90_UPI000A114446
contig_1	cds	100006	100641	+	ENBDON_00096	323	3.1e-110	0.981	0.981	0.783	UniRef:UniRef90_UPI000A10040B
contig_1	cds	101082	101741	+	ENBDON_00097	293	1.9e-98	0.95	0.963	0.716	UniRef:UniRef90_A0A5M3X7C7
contig_1	cds	102397	103872	-	ENBDON_00098	884	0	0.998	0.998	0.912	UniRef:UniRef90_UPI00131BB58C
contig_1	cds	103955	104407	-	ENBDON_00099	256	7.1e-86	0.92	1	0.833	UniRef:UniRef90_A0A1U0ZCW5
contig_1	cds	104423	104734	+	ENBDON_00100	-	-	-	-	-	-
contig_1	cds	104992	105444	-	ENBDON_00101	-	0	1	1	1	UniRef:UniRef100_A0A385HRA8
contig_1	cds	105441	105800	-	ENBDON_00102	-	0	1	1	1	UniRef:UniRef100_A0A1J0TQ62
contig_1	cds	107153	108100	+	ENBDON_00103	573	5.5e-206	0.997	0.997	0.86	UniRef:UniRef90_UPI000A118C18
contig_1	cds	108119	109615	+	ENBDON_00104	804	3.8e-291	0.988	0.992	0.843	UniRef:UniRef90_UPI001EEE4BD6
contig_1	cds	109874	110563	+	ENBDON_00105	405	1.9e-142	1	1.009	0.873	UniRef:UniRef90_A0A4P8PMM5
contig_1	cds	110645	112246	+	ENBDON_00106	919	0	1	1	0.861	UniRef:UniRef90_UPI000A0F49DA
contig_1	cds	112243	113070	+	ENBDON_00107	409	1.6e-142	0.895	0.988	0.833	UniRef:UniRef90_UPI000A104319
contig_1	cds	113164	114534	+	ENBDON_00108	723	3.3e-260	0.993	0.989	0.821	UniRef:UniRef90_UPI00111BFA15
contig_1	cds	114625	115818	+	ENBDON_00109	736	1.3e-267	1	0.99	0.935	UniRef:UniRef90_UPI00169A09F4
contig_1	cds	116220	116393	-	ENBDON_00110	97.1	1.5e-25	1.088	0.984	0.839	UniRef:UniRef90_A0A5M3YA33
contig_1	cds	116480	116734	-	ENBDON_00111	166	3.4e-52	1	0.832	0.893	UniRef:UniRef90_A0A6N7CX14
contig_1	cds	117619	117855	+	ENBDON_00112	-	-	-	-	-	-
contig_1	cds	118610	118915	-	ENBDON_00113	108	5.5e-29	0.96	0.924	0.577	UniRef:UniRef90_A0A6H1C8K9
contig_1	cds	118924	119253	-	ENBDON_00114	160	3.4e-49	0.972	0.972	0.736	UniRef:UniRef90_UPI001AD858C5
contig_1	cds	120184	120636	-	ENBDON_00115	-	0	1	1	1	UniRef:UniRef100_A0A385HRA8
contig_1	cds	120633	120992	-	ENBDON_00116	-	0	1	1	1	UniRef:UniRef100_A0A1J0TQ62
contig_1	cds	121172	122548	+	ENBDON_00117	550	6e-192	0.98	0.968	0.637	UniRef:UniRef90_A0A7W4Z2N1
contig_1	cds	122577	123821	+	ENBDON_00118	642	8.6e-230	0.981	0.978	0.771	UniRef:UniRef90_A0A7W4Z293
contig_1	cds	123821	124063	+	ENBDON_00119	-	-	-	-	-	-
contig_1	cds	124151	124474	+	ENBDON_00120	157	6.9e-48	1	1	0.673	UniRef:UniRef90_A0A554QEE8
contig_1	cds	124471	125742	+	ENBDON_00121	407	3.6e-137	0.969	0.993	0.563	UniRef:UniRef90_A0A7W4VYM9
contig_1	cds	125826	126557	+	ENBDON_00122	293	1.2e-97	0.979	0.975	0.697	UniRef:UniRef90_UPI002235BB26
contig_1	cds	126604	127212	+	ENBDON_00123	241	8.8e-79	0.876	1	0.678	UniRef:UniRef90_UPI002236AA0D
contig_1	cds	127328	127954	-	ENBDON_00124	213	4.6e-67	0.938	0.911	0.59	UniRef:UniRef90_UPI00101048C4
contig_1	cds	128102	129298	+	ENBDON_00125	566	2.4e-200	1	1	0.688	UniRef:UniRef90_UPI0013E96342
contig_1	cds	129328	130392	+	ENBDON_00126	402	5.9e-137	1	1.017	0.605	UniRef:UniRef90_A0A0D8HV85
contig_1	cds	130486	131844	+	ENBDON_00127	588	5.6e-207	0.962	0.944	0.667	UniRef:UniRef90_UPI0019090530
contig_1	cds	132138	132863	+	ENBDON_00128	311	1.5e-104	1	1	0.714	UniRef:UniRef90_A0A0V9UKT6
contig_1	cds	132874	133296	+	ENBDON_00129	-	-	-	-	-	-
contig_1	cds	133911	134471	-	ENBDON_00130	222	6.2e-71	0.941	0.822	0.691	UniRef:UniRef90_V9XLP1
contig_1	cds	134723	135622	-	ENBDON_00131	383	5.3e-131	0.977	0.915	0.675	UniRef:UniRef90_A0A0Q9S6A4
contig_1	cds	135776	136366	-	ENBDON_00132	300	9.4e-102	0.99	0.995	0.773	UniRef:UniRef90_A0A4R6L155
contig_1	cds	136702	138105	-	ENBDON_00133	691	3.1e-247	1	1	0.887	UniRef:UniRef90_M2WQN6
contig_1	cds	138161	138691	-	ENBDON_00134	353	2e-123	1	1	0.949	UniRef:UniRef90_A0A0M8PRT7
contig_1	cds	138768	140510	-	ENBDON_00135	1110	0	1	1	0.988	UniRef:UniRef90_M2YQH5
contig_1	cds	140510	141814	-	ENBDON_00136	787	1.5e-286	1	1	0.982	UniRef:UniRef90_M2YRU6
contig_1	tRNA	141847	141941	-	ENBDON_00137	106.8	-	-	-	-	-
contig_1	cds	141999	143021	+	ENBDON_00138	630	2.5e-227	1	0.988	0.926	UniRef:UniRef90_V9XA47
contig_1	cds	143130	143699	+	ENBDON_00139	310	6.3e-106	1	1	0.767	UniRef:UniRef90_A0A7V9F6B4
contig_1	cds	143808	146501	+	ENBDON_00140	1486	0	0.963	0.978	0.818	UniRef:UniRef90_A0A4P7ID01
contig_1	cds	146498	147412	+	ENBDON_00141	-	0	1	1	1	UniRef:UniRef100_UPI0025A1589D
contig_1	cds	147409	148428	+	ENBDON_00142	-	0	1	1	1	UniRef:UniRef100_UPI0025A0D9F5
contig_1	cds	148464	149786	+	ENBDON_00143	841	1.1e-307	0.998	0.998	0.989	UniRef:UniRef90_M2XPE5
contig_1	cds	149949	150512	-	ENBDON_00144	374	3.8e-131	1	1	0.973	UniRef:UniRef90_A0A2X4U2C5
contig_1	cds	150591	152162	+	ENBDON_00145	1000	0	1	1	0.975	UniRef:UniRef90_N1MDT8
contig_1	cds	152594	157243	+	ENBDON_00146	2735	0	0.983	0.992	0.932	UniRef:UniRef90_N1M9F3
contig_1	cds	157748	158998	-	ENBDON_00147	746	1.2e-270	1.01	1	0.902	UniRef:UniRef90_UPI0026F26EBF
contig_1	cds	159200	160504	-	ENBDON_00148	853	0	1	1	0.986	UniRef:UniRef90_M2Y810
contig_1	cds	160880	162433	+	ENBDON_00149	982	0	1	1	0.975	UniRef:UniRef90_A0A098BN96
contig_1	cds	162491	163822	+	ENBDON_00150	786	1.2e-285	1	1	0.914	UniRef:UniRef90_A0A098BPP5
contig_1	cds	163913	164977	+	ENBDON_00151	706	6.8e-257	0.997	0.962	0.986	UniRef:UniRef90_A0A098BNA1
contig_1	cds	164988	165875	-	ENBDON_00152	521	6.8e-186	0.976	1	0.944	UniRef:UniRef90_A0A0M9WP64
contig_1	cds	165872	167347	-	ENBDON_00153	980	0	1	1	0.978	UniRef:UniRef90_A0A5M3YH64
contig_1	cds	167440	168033	+	ENBDON_00154	360	2.5e-125	1	1	0.975	UniRef:UniRef90_A0A098BNA0
contig_1	cds	168047	168349	-	ENBDON_00155	-	0	1	1	1	UniRef:UniRef100_UPI0025A0BD2B
contig_1	cds	168498	169949	-	ENBDON_00156	-	0	1	1	1	UniRef:UniRef100_UPI0006C87AC9
contig_1	cds	170081	170584	+	ENBDON_00157	327	1.7e-113	1	1	0.976	UniRef:UniRef90_M2WQT1
contig_1	cds	170663	171289	+	ENBDON_00158	389	3.1e-136	1	0.954	0.966	UniRef:UniRef90_A0A098BNA5
contig_1	cds	171316	174504	+	ENBDON_00159	1972	0	1	1	0.993	UniRef:UniRef90_N1M7L5
contig_1	cds	174549	175187	+	ENBDON_00160	-	0	1	1	1	UniRef:UniRef100_M2YRZ2
contig_1	cds	175243	176610	-	ENBDON_00161	823	4.9e-300	1.018	1	0.978	UniRef:UniRef90_M2XPH6
contig_1	cds	176607	177530	-	ENBDON_00162	-	0	1	1	1	UniRef:UniRef100_M2WQT7
contig_1	cds	177577	178389	-	ENBDON_00163	535	4.2e-192	1	1	0.996	UniRef:UniRef90_A0A379LXS1
contig_1	cds	178533	179294	+	ENBDON_00164	484	7.4e-173	1	1	0.992	UniRef:UniRef90_A0A0M9WP60
contig_1	cds	179660	181357	-	ENBDON_00165	1065	0	0.966	1	0.974	UniRef:UniRef90_A0A098BNA4
contig_1	cds	181351	181491	-	ENBDON_00166	-	-	-	-	-	-
contig_1	cds	181785	182522	+	ENBDON_00167	443	1.2e-156	1	1	0.927	UniRef:UniRef90_A0A098BLZ7
contig_1	cds	182475	183164	-	ENBDON_00168	452	1.7e-160	1	0.946	0.965	UniRef:UniRef90_A0A0M8PHB2
contig_1	cds	183360	184307	-	ENBDON_00169	-	0	1	1	1	UniRef:UniRef100_UPI0025A24B54
contig_1	cds	184324	184899	-	ENBDON_00170	-	0	1	1	1	UniRef:UniRef100_UPI0025A0A9F4
contig_1	cds	184931	185416	-	ENBDON_00171	272	9.5e-92	1	1	0.975	UniRef:UniRef90_A0A385HGC3
contig_1	cds	185428	186102	-	ENBDON_00172	-	0	1	1	1	UniRef:UniRef100_UPI0025A04B86
contig_1	cds	186209	187801	+	ENBDON_00173	1073	0	1	0.812	0.981	UniRef:UniRef90_A0A098BLW1
contig_1	cds	187827	188651	-	ENBDON_00174	528	2.2e-189	1	1	0.982	UniRef:UniRef90_M2XPK4
contig_1	cds	188708	189475	-	ENBDON_00175	-	0	1	1	1	UniRef:UniRef100_A0A0M9WP57
contig_1	cds	189658	190878	-	ENBDON_00176	693	2.7e-250	0.99	0.985	0.963	UniRef:UniRef90_A0A2I6L962
contig_1	cds	190875	191378	-	ENBDON_00177	311	6.6e-107	1	0.928	0.964	UniRef:UniRef90_A0A098BJ47
contig_1	cds	191419	192123	-	ENBDON_00178	394	1.2e-137	0.97	0.966	0.921	UniRef:UniRef90_A0A098BKK8
contig_1	cds	192378	192905	-	ENBDON_00179	-	0	1	1	1	UniRef:UniRef100_A0A0M9WP51
contig_1	cds	193085	193708	-	ENBDON_00180	-	0	1	1	1	UniRef:UniRef100_A0A098BHU4
contig_1	cds	193999	195087	+	ENBDON_00181	683	2.5e-247	0.997	0.94	0.97	UniRef:UniRef90_A0A098BHQ4
contig_1	cds	195097	195765	+	ENBDON_00182	-	0	1	1	1	UniRef:UniRef100_A0A0M9WP46
contig_1	cds	195907	196503	+	ENBDON_00183	350	1.8e-121	1	1	0.924	UniRef:UniRef90_A0A098BKL3
contig_1	cds	196517	197455	-	ENBDON_00184	603	5.6e-218	1	1	0.981	UniRef:UniRef90_A0A098BJ65
contig_1	cds	197928	198254	+	ENBDON_00185	-	0	1	1	1	UniRef:UniRef100_A0A0M9WP59
contig_1	cds	198254	199240	+	ENBDON_00186	596	2.2e-214	1	1	0.927	UniRef:UniRef90_M2Y870
contig_1	cds	199237	200010	+	ENBDON_00187	486	3.5e-173	1	1	0.961	UniRef:UniRef90_A0A098BKL8
contig_1	cds	200020	200934	+	ENBDON_00188	556	1.7e-199	1	1	0.924	UniRef:UniRef90_M2YS28
contig_1	cds	201050	201988	-	ENBDON_00189	-	0	1	1	1	UniRef:UniRef100_M2XPL9
contig_1	cds	202422	203225	-	ENBDON_00190	-	0	1	1	1	UniRef:UniRef100_M2WQX8
contig_1	cds	203475	203744	+	ENBDON_00191	-	0	1	1	1	UniRef:UniRef100_M2Y875
contig_1	cds	203836	206877	-	ENBDON_00192	1644	0	1.003	1	0.958	UniRef:UniRef90_N1MBT9
contig_1	cds	206943	207707	-	ENBDON_00193	489	1.2e-174	1	1	0.984	UniRef:UniRef90_M2YS31
contig_1	cds	207790	208491	+	ENBDON_00194	420	6.5e-148	1	1	0.979	UniRef:UniRef90_A0A098BHV6
contig_1	cds	208529	209461	+	ENBDON_00195	565	8.4e-203	1	1	0.958	UniRef:UniRef90_A0A385HGG9
contig_1	cds	209458	210120	+	ENBDON_00196	409	6.3e-144	1	1	0.918	UniRef:UniRef90_A0A385HGD9
contig_1	cds	210240	210887	+	ENBDON_00197	-	0	1	1	1	UniRef:UniRef100_A0A0M8PFC6
contig_1	cds	210897	211679	-	ENBDON_00198	-	0	1	1	1	UniRef:UniRef100_UPI00259FE198
contig_1	cds	211712	212680	-	ENBDON_00199	600	4.1e-216	1	1	0.981	UniRef:UniRef90_A0A385HGC5
contig_1	cds	212869	213669	+	ENBDON_00200	-	0	1	1	1	UniRef:UniRef100_M2WQY6
contig_1	cds	213770	214963	+	ENBDON_00201	737	7.6e-268	1	1	0.952	UniRef:UniRef90_N1MFF3
contig_1	cds	214996	215757	+	ENBDON_00202	-	0	1	1	1	UniRef:UniRef100_A0A0M8PMT2
contig_1	cds	215795	216433	+	ENBDON_00203	408	4.9e-144	1	1	0.986	UniRef:UniRef90_A0A2D2A0V9
contig_1	cds	216480	217637	+	ENBDON_00204	748	2.4e-272	1	0.951	0.971	UniRef:UniRef90_A0A098BHW4
contig_1	cds	217666	218424	+	ENBDON_00205	422	2.4e-148	1	1	0.905	UniRef:UniRef90_A0A098BHT0
contig_1	cds	218471	218758	+	ENBDON_00206	187	3.7e-60	1	1	0.947	UniRef:UniRef90_M2Y887
contig_1	cds	218906	219064	+	ENBDON_00207	-	0	1	1	1	UniRef:UniRef100_M2YQT5
contig_1	cds	219142	220200	+	ENBDON_00208	699	2.8e-254	1	1	0.983	UniRef:UniRef90_A0A098BJ93
contig_1	cds	220197	221270	+	ENBDON_00209	672	9.6e-244	1	1	0.933	UniRef:UniRef90_A0A098BHW9
contig_1	cds	221277	222569	+	ENBDON_00210	758	2.9e-275	1	1	0.984	UniRef:UniRef90_A0A098BHT6
contig_1	cds	222462	223439	-	ENBDON_00211	-	0	1	1	1	UniRef:UniRef100_A0A0M8PLY4
contig_1	cds	223540	223938	-	ENBDON_00212	256	1.4e-86	1	1	0.955	UniRef:UniRef90_A0A385HGD3
contig_1	cds	224008	224877	-	ENBDON_00213	556	6.2e-200	1	0.954	0.972	UniRef:UniRef90_A0A098BJ98
contig_1	cds	224976	225224	-	ENBDON_00214	-	0	1	1	1	UniRef:UniRef100_A0A0M8PMS8
contig_1	cds	225746	226507	+	ENBDON_00215	-	0	1	1	1	UniRef:UniRef100_A0A098BHU0
contig_1	cds	226581	227054	-	ENBDON_00216	250	1e-83	0.834	1	0.992	UniRef:UniRef90_UPI00200EB5FB
contig_1	cds	227253	227657	+	ENBDON_00217	255	6.5e-86	1	1	0.978	UniRef:UniRef90_UPI00200D704C
contig_1	cds	227688	228227	+	ENBDON_00218	340	3.8e-118	1	1	0.983	UniRef:UniRef90_A0A098BHX8
contig_1	cds	228241	229659	+	ENBDON_00219	838	1.5e-305	1	1	0.917	UniRef:UniRef90_A0A0M8PI32
contig_1	cds	229735	230007	-	ENBDON_00220	-	0	1	1	1	UniRef:UniRef100_A0A8D4G1Q4
contig_1	cds	230231	230701	-	ENBDON_00221	-	0	1	1	1	UniRef:UniRef100_A0A8D4FY65
contig_1	cds	231003	232238	-	ENBDON_00222	720	5.8e-260	1	0.886	0.956	UniRef:UniRef90_N1MCJ4
contig_1	cds	232571	234925	+	ENBDON_00223	1640	0	1	1	0.997	UniRef:UniRef90_N1M834
contig_1	cds	235280	235693	-	ENBDON_00224	-	0	1	1	1	UniRef:UniRef100_A0A2I6L913
contig_1	cds	235934	236551	+	ENBDON_00225	391	1.5e-137	1	1	0.976	UniRef:UniRef90_A0A098BKR0
contig_1	cds	236628	236855	+	ENBDON_00226	-	0	1	1	1	UniRef:UniRef100_A0A2I6L966
contig_1	cds	236927	237388	+	ENBDON_00227	285	4.9e-97	1	1	0.98	UniRef:UniRef90_A0A098BHY7
contig_1	cds	237520	239019	+	ENBDON_00228	-	0	1	1	1	UniRef:UniRef100_UPI0019337A4E
contig_1	cds	239016	240371	+	ENBDON_00229	800	1e-290	1.004	0.966	0.962	UniRef:UniRef90_A0A098BJA0
contig_1	cds	240332	241993	-	ENBDON_00230	974	0	1	1	0.991	UniRef:UniRef90_A0A5M3YC18
contig_1	cds	242096	242917	-	ENBDON_00231	533	4.2e-191	1	0.938	0.956	UniRef:UniRef90_M2YQV4
contig_1	cds	243417	244547	+	ENBDON_00232	724	1.6e-263	1	1	0.936	UniRef:UniRef90_A0A0M9WN88
contig_1	cds	244700	245458	-	ENBDON_00233	448	1.5e-158	1	1	0.937	UniRef:UniRef90_A0A098BHW3
contig_1	cds	245455	246342	-	ENBDON_00234	-	0	1	1	1	UniRef:UniRef100_M2XPQ6
contig_1	cds	246525	246899	+	ENBDON_00235	234	3.8e-78	1	1	0.935	UniRef:UniRef90_M2WR14
contig_1	cds	246899	247531	+	ENBDON_00236	-	0	1	1	1	UniRef:UniRef100_M2Y8B0
contig_1	cds	247655	247957	-	ENBDON_00237	-	0	1	1	1	UniRef:UniRef100_A0A098BHZ5
contig_1	cds	248068	248943	-	ENBDON_00238	-	-	-	-	-	-
contig_1	cds	248996	249463	+	ENBDON_00239	267	1.9e-89	1	0.816	0.897	UniRef:UniRef90_UPI0013EE3436
contig_1	cds	249600	250370	+	ENBDON_00240	501	2.6e-179	1	1	0.957	UniRef:UniRef90_A0A098BKS4
contig_1	cds	250410	252803	-	ENBDON_00241	1468	0	1	0.94	0.923	UniRef:UniRef90_N1M3B4
contig_1	cds	252859	253308	-	ENBDON_00242	-	0	1	1	1	UniRef:UniRef100_A0A0M8PC86
contig_1	cds	253497	255287	+	ENBDON_00243	1162	0	1	0.998	0.936	UniRef:UniRef90_N1MF53
contig_1	cds	255383	255793	+	ENBDON_00244	262	1.4e-88	1	1	0.904	UniRef:UniRef90_A0A5N8XE70
contig_1	cds	256016	256924	-	ENBDON_00245	544	1.2e-194	1.003	0.993	0.947	UniRef:UniRef90_A0A098BJB3
contig_1	cds	257038	257355	-	ENBDON_00246	-	0	1	1	1	UniRef:UniRef100_A0A0M9WLP4
contig_1	cds	257554	258183	+	ENBDON_00247	-	0	1	1	1	UniRef:UniRef100_UPI00200CB705
contig_1	cds	258358	259419	+	ENBDON_00248	651	2.4e-235	1	1	0.932	UniRef:UniRef90_M2YMN7
contig_1	cds	259444	260673	+	ENBDON_00249	793	1.6e-289	1	1	0.971	UniRef:UniRef90_A0A059MH39
contig_1	cds	261143	262684	-	ENBDON_00250	1033	0	1	1	0.99	UniRef:UniRef90_N1MBW2
contig_1	cds	262764	264110	-	ENBDON_00251	-	0	1	1	1	UniRef:UniRef100_A0A0M8PCG4
contig_1	cds	264570	265493	-	ENBDON_00252	-	0	1	1	1	UniRef:UniRef100_A0A0M8PF09
contig_1	cds	265540	266046	+	ENBDON_00253	327	3.2e-113	0.988	0.949	0.976	UniRef:UniRef90_A0A0M8PC80
contig_1	cds	266235	266360	-	ENBDON_00254	51.2	6.7e-08	0.976	1	0.675	UniRef:UniRef90_N1MAL4
contig_1	cds	266392	267171	-	ENBDON_00255	-	0	1	1	1	UniRef:UniRef100_UPI00029A6872
contig_1	cds	267307	267978	+	ENBDON_00256	-	0	1	1	1	UniRef:UniRef100_M2ZQL4
contig_1	cds	268303	269730	+	ENBDON_00257	916	0	1	0.99	0.96	UniRef:UniRef90_A0A098BKT4
contig_1	cds	269980	272301	+	ENBDON_00258	1469	0	1	1	0.931	UniRef:UniRef90_U3Q7T2
contig_1	cds	272328	273656	+	ENBDON_00259	835	3.9e-305	1.007	1	0.955	UniRef:UniRef90_A0A098BI09
contig_1	cds	273759	273986	+	ENBDON_00260	119	9e-34	1	1	0.987	UniRef:UniRef90_A0A098BHY4
contig_1	cds	273919	274257	-	ENBDON_00261	-	0	1	1	1	UniRef:UniRef100_M2YML7
contig_1	cds	274271	275347	-	ENBDON_00262	-	0	1	1	1	UniRef:UniRef100_M2ZRU6
contig_1	cds	275396	275785	+	ENBDON_00263	143	7.3e-42	1	0.985	0.953	UniRef:UniRef90_A0A098BJE9
contig_1	cds	275828	277090	+	ENBDON_00264	769	1.4e-279	0.995	0.977	0.923	UniRef:UniRef90_A0A2X4X1K8
contig_1	cds	277228	277620	-	ENBDON_00265	-	0	1	1	1	UniRef:UniRef100_A0A0M8PJL4
contig_1	cds	277652	278200	-	ENBDON_00266	367	1.5e-128	1	1	0.995	UniRef:UniRef90_A0A385HGL2
contig_1	cds	278243	279418	+	ENBDON_00267	701	7.4e-254	1	0.997	0.982	UniRef:UniRef90_A0A0M8PKF9
contig_1	cds	279430	280401	+	ENBDON_00268	413	3.1e-142	1.003	1	0.944	UniRef:UniRef90_A0A8D4K584
contig_1	cds	280431	281981	-	ENBDON_00269	-	0	1	1	1	UniRef:UniRef100_M2Z737
contig_1	cds	282155	282916	+	ENBDON_00270	-	0	1	1	1	UniRef:UniRef100_M2XPZ8
contig_1	cds	282943	283800	+	ENBDON_00271	538	1.1e-192	1	0.941	0.961	UniRef:UniRef90_M2YMK8
contig_1	cds	283813	285861	-	ENBDON_00272	1148	0	0.969	0.918	0.964	UniRef:UniRef90_A0A098BI22
contig_1	cds	286179	287735	+	ENBDON_00273	961	0	1	0.996	0.952	UniRef:UniRef90_A0A098BHZ9
contig_1	cds	287822	288931	-	ENBDON_00274	689	7.6e-250	1	0.992	0.957	UniRef:UniRef90_A0A098BJD7
contig_1	cds	289090	289680	-	ENBDON_00275	399	6.5e-141	1	1	0.969	UniRef:UniRef90_A0A098BKV6
contig_1	cds	289806	290921	+	ENBDON_00276	713	2.8e-259	0.992	0.992	0.924	UniRef:UniRef90_A0A098BJG4
contig_1	cds	290923	291906	+	ENBDON_00277	600	8e-216	1.083	1	0.876	UniRef:UniRef90_A0A098BI26
contig_1	cds	291949	293301	+	ENBDON_00278	786	1.5e-285	0.976	0.954	0.979	UniRef:UniRef90_M2ZQI1
contig_1	cds	293312	293791	-	ENBDON_00279	285	5.4e-97	1	1	0.994	UniRef:UniRef90_A0A098BJE2
contig_1	cds	293924	294676	+	ENBDON_00280	465	3.5e-165	1	1	0.924	UniRef:UniRef90_A0A098BKW1
contig_1	cds	294750	295970	+	ENBDON_00281	-	0	1	1	1	UniRef:UniRef100_M2YMJ7
contig_1	cds	295967	297883	+	ENBDON_00282	1223	0	1.013	1	0.949	UniRef:UniRef90_A0A098BI31
contig_1	cds	297867	298403	+	ENBDON_00283	-	0	1	1	1	UniRef:UniRef100_M2ZQH2
contig_1	cds	298400	299305	+	ENBDON_00284	553	1.6e-198	1	1	0.963	UniRef:UniRef90_A0A059MH05
contig_1	cds	299286	301241	+	ENBDON_00285	1194	0	1	1	0.926	UniRef:UniRef90_A0A098BGU3
contig_1	cds	301549	302559	+	ENBDON_00286	-	0	1	1	1	UniRef:UniRef100_A0A0M8PGG6
contig_1	cds	302782	304677	+	ENBDON_00287	1226	0	1.003	0.997	0.954	UniRef:UniRef90_M2ZRS1
contig_1	cds	304830	305381	+	ENBDON_00288	-	0	1	1	1	UniRef:UniRef100_M2ZQG8
contig_1	cds	305393	306355	+	ENBDON_00289	-	0	1	1	1	UniRef:UniRef100_M2Z713
contig_1	cds	306506	307507	+	ENBDON_00290	-	0	1	1	1	UniRef:UniRef100_A0A0M9WNW4
contig_1	cds	307677	309566	+	ENBDON_00291	-	0	1	1	1	UniRef:UniRef100_A0A8D4K2V3
contig_1	cds	309602	314629	+	ENBDON_00292	3135	0	1	1	0.991	UniRef:UniRef90_M2ZRR8
contig_1	cds	314637	316181	+	ENBDON_00293	-	0	1	1	1	UniRef:UniRef100_M2ZQG2
contig_1	cds	316250	317209	-	ENBDON_00294	628	1.8e-227	1	0.994	0.991	UniRef:UniRef90_A0A0M8PGH2
contig_1	cds	317402	317836	-	ENBDON_00295	275	1.6e-93	1	1	0.958	UniRef:UniRef90_A0A0M9WNX9
contig_1	cds	318057	321368	-	ENBDON_00296	-	0	1	1	1	UniRef:UniRef100_M2YMH9
contig_1	cds	321430	324681	-	ENBDON_00297	1979	0	0.999	0.969	0.936	UniRef:UniRef90_A0A098BFD8
contig_1	cds	324789	325058	-	ENBDON_00298	-	0	1	1	1	UniRef:UniRef100_M2ZQF7
contig_1	cds	325097	325864	+	ENBDON_00299	475	3.9e-169	1	1	0.937	UniRef:UniRef90_C7U1M4
contig_1	cds	325926	328700	+	ENBDON_00300	1719	0	1	1	0.927	UniRef:UniRef90_A0A385HGW5
contig_1	cds	328837	329256	+	ENBDON_00301	250	9.1e-84	1	1	0.928	UniRef:UniRef90_M2YMH4
contig_1	cds	329308	331251	-	ENBDON_00302	1206	0	1	1	0.977	UniRef:UniRef90_A0A098BGS1
contig_1	cds	331261	332058	-	ENBDON_00303	492	3.5e-175	1.042	1	0.949	UniRef:UniRef90_A0A098BI96
contig_1	cds	332058	333482	-	ENBDON_00304	-	0	1	1	1	UniRef:UniRef100_A0A0M9WNW8
contig_1	cds	333652	334137	+	ENBDON_00305	-	0	1	1	1	UniRef:UniRef100_UPI000A856E1F
contig_1	cds	334202	334687	-	ENBDON_00306	-	0	1	1	1	UniRef:UniRef100_UPI0025A2E553
contig_1	cds	334684	335271	-	ENBDON_00307	-	0	1	1	1	UniRef:UniRef100_A0A0M8PPQ6
contig_1	cds	335274	336146	-	ENBDON_00308	-	0	1	1	1	UniRef:UniRef100_A0A0M9WNX8
contig_1	cds	336211	337227	+	ENBDON_00309	654	9.4e-237	0.967	0.94	0.963	UniRef:UniRef90_UPI001931CC0A
contig_1	cds	337185	338153	-	ENBDON_00310	-	0	1	1	1	UniRef:UniRef100_UPI0025A172FC
contig_1	cds	338156	339199	-	ENBDON_00311	657	7.8e-238	1	1	0.957	UniRef:UniRef90_A0A098BFG3
contig_1	cds	339318	340157	+	ENBDON_00312	515	3.5e-184	0.996	0.996	0.939	UniRef:UniRef90_A0A098BGT1
contig_1	cds	340191	342431	-	ENBDON_00313	1418	0	0.999	0.958	0.961	UniRef:UniRef90_A0A385HGS4
contig_1	cds	342611	344512	+	ENBDON_00314	1183	0	1	1	0.937	UniRef:UniRef90_A0A098BGY4
contig_1	cds	344516	346027	+	ENBDON_00315	934	0	1	1	0.956	UniRef:UniRef90_A0A098BFD7
contig_1	cds	346031	346885	-	ENBDON_00316	489	1.7e-173	1	1	0.937	UniRef:UniRef90_A0A098BFG8
contig_1	cds	347042	347941	-	ENBDON_00317	-	0	1	1	1	UniRef:UniRef100_UPI0025A2D5CC
contig_1	cds	347938	348762	-	ENBDON_00318	-	0	1	1	1	UniRef:UniRef100_A0A0M8PPQ0
contig_1	cds	348775	349650	-	ENBDON_00319	-	0	1	1	1	UniRef:UniRef100_A0A0M9WNV6
contig_1	cds	349689	350276	-	ENBDON_00320	-	0	1	1	1	UniRef:UniRef100_A0A0M8PGS7
contig_1	cds	350391	351641	+	ENBDON_00321	784	6e-286	1	1	0.993	UniRef:UniRef90_A0A098BFH3
contig_1	cds	351657	352643	-	ENBDON_00322	-	0	1	1	1	UniRef:UniRef100_M2Y7E5
contig_1	cds	352716	353228	+	ENBDON_00323	327	4.4e-113	1	0.994	0.982	UniRef:UniRef90_A0A098BIB9
contig_1	tRNA	353239	353326	+	ENBDON_00324	78.7	-	-	-	-	-
contig_1	cds	353487	354833	+	ENBDON_00325	831	2.7e-303	0.998	0.998	0.94	UniRef:UniRef90_A0A098BGZ1
contig_1	cds	354961	355932	+	ENBDON_00326	602	6e-217	1.009	1	0.939	UniRef:UniRef90_A0A0M8PC16
contig_1	cds	355944	357626	-	ENBDON_00327	971	0	1.002	0.996	0.884	UniRef:UniRef90_A0A059MHK8
contig_1	cds	357732	358817	-	ENBDON_00328	-	0	1	1	1	UniRef:UniRef100_UPI00259FF6E8
contig_1	cds	358827	359588	+	ENBDON_00329	498	2.4e-178	1	1	0.972	UniRef:UniRef90_A0A0M8PJC3
contig_1	tRNA	359665	359756	+	ENBDON_00330	80.4	-	-	-	-	-
contig_1	tRNA	359821	359893	+	ENBDON_00331	76	-	-	-	-	-
contig_1	cds	359971	361320	-	ENBDON_00332	863	0	1	0.978	0.953	UniRef:UniRef90_A0A5M3Y3Y6
contig_1	cds	361407	362180	-	ENBDON_00333	433	3.9e-152	1	0.959	0.926	UniRef:UniRef90_A0A098BFI4
contig_1	cds	362200	362622	-	ENBDON_00334	-	0	1	1	1	UniRef:UniRef100_M2YQ00
contig_1	cds	362640	363803	-	ENBDON_00335	764	5e-279	1	0.98	0.966	UniRef:UniRef90_A0A098BID0
contig_1	cds	363909	364157	-	ENBDON_00336	156	1.6e-48	1	1	0.988	UniRef:UniRef90_A0A0M9WLD9
contig_1	rRNA	364780	366302	+	ENBDON_00337	1583.1	6.7e-48	-	-	-	RFAM:RF00177
contig_1	rRNA	366602	369735	+	ENBDON_00338	2804.3	5.1e-05	-	-	-	RFAM:RF02541
contig_1	rRNA	369894	370010	+	ENBDON_00339	89.9	3.6e-14	-	-	-	RFAM:RF00001
contig_1	cds	370227	370835	+	ENBDON_00340	-	0	1	1	1	UniRef:UniRef100_M2ZS67
contig_1	cds	370896	372032	-	ENBDON_00341	704	1.1e-255	1	1	0.947	UniRef:UniRef90_A0A098BNL9
contig_1	cds	372346	372861	+	ENBDON_00342	-	0	1	1	1	UniRef:UniRef100_A0A098BRI2
contig_1	cds	372858	374207	-	ENBDON_00343	864	0	1	0.993	0.993	UniRef:UniRef90_N1MBM5
contig_1	cds	374204	375166	-	ENBDON_00344	596	8.2e-215	1	1	0.991	UniRef:UniRef90_A0A098BP34
contig_1	cds	375215	375754	+	ENBDON_00345	-	0	1	1	1	UniRef:UniRef100_A0A0M8PE49
contig_1	cds	375755	376228	+	ENBDON_00346	-	0	1	1	1	UniRef:UniRef100_A0A0M9WMH8
contig_1	tRNA	376274	376364	+	ENBDON_00347	76.7	-	-	-	-	-
contig_1	cds	376477	377424	-	ENBDON_00348	622	3.4e-225	1	1	0.975	UniRef:UniRef90_M2XRK5
contig_1	cds	377421	378704	-	ENBDON_00349	-	0	1	1	1	UniRef:UniRef100_M2YNW2
contig_1	cds	378923	379882	-	ENBDON_00350	-	0	1	1	1	UniRef:UniRef100_A0A0M8PLB8
contig_1	cds	379959	380534	-	ENBDON_00351	332	2.1e-114	1	1	0.921	UniRef:UniRef90_A0A059MGK6
contig_1	cds	380629	381627	+	ENBDON_00352	-	0	1	1	1	UniRef:UniRef100_UPI0025A1EEC1
contig_1	cds	381728	382189	+	ENBDON_00353	-	0	1	1	1	UniRef:UniRef100_A0A0M8PKG3
contig_1	cds	382268	382882	+	ENBDON_00354	376	1.7e-131	0.995	0.995	0.985	UniRef:UniRef90_A0A0M9WMH3
contig_1	cds	382920	385262	+	ENBDON_00355	-	0	1	1	1	UniRef:UniRef100_M2ZTE8
contig_1	cds	385345	387072	+	ENBDON_00356	-	0	1	1	1	UniRef:UniRef100_UPI0025A0EDD6
contig_1	cds	387069	389000	+	ENBDON_00357	-	0	1	1	1	UniRef:UniRef100_M2Z8M5
contig_1	cds	389104	390291	-	ENBDON_00358	684	2.4e-246	0.972	0.857	0.964	UniRef:UniRef90_A0A0M9WMI2
contig_1	cds	390359	391240	-	ENBDON_00359	563	1.8e-202	1	1	0.966	UniRef:UniRef90_A0A385HGS5
contig_1	cds	391313	391912	+	ENBDON_00360	353	1.3e-122	1	0.985	0.945	UniRef:UniRef90_A0A385HGY9
contig_1	cds	391937	392353	-	ENBDON_00361	-	0	1	1	1	UniRef:UniRef100_A0A0M8PM60
contig_1	cds	392507	395230	+	ENBDON_00362	1652	0	1	1	0.979	UniRef:UniRef90_A0A5M3YHT2
contig_1	cds	395283	395381	+	ENBDON_00363	-	-	-	-	-	-
contig_1	cds	395420	395944	-	ENBDON_00364	-	0	1	1	1	UniRef:UniRef100_A0A0M8PHZ0
contig_1	cds	396237	397142	+	ENBDON_00365	598	4.6e-216	1	1	0.987	UniRef:UniRef90_M2XRI8
contig_1	cds	397323	397820	+	ENBDON_00366	307	1.2e-105	1	1	0.915	UniRef:UniRef90_N1MHS5
contig_1	cds	398209	399339	+	ENBDON_00367	-	0	1	1	1	UniRef:UniRef100_M2ZTD6
contig_1	cds	399365	400630	+	ENBDON_00368	-	0	1	1	1	UniRef:UniRef100_M2ZS35
contig_1	cds	400673	401398	-	ENBDON_00369	-	0	1	1	1	UniRef:UniRef100_UPI0025A26401
contig_1	cds	401493	402515	-	ENBDON_00370	419	8e-144	1.032	1	0.926	UniRef:UniRef90_A0A098BNN9
contig_1	cds	402565	403518	-	ENBDON_00371	425	1.9e-146	1.019	0.866	0.929	UniRef:UniRef90_M2YNU1
contig_1	cds	403665	404588	-	ENBDON_00372	586	3.9e-211	1	1	0.964	UniRef:UniRef90_A0A842H9J2
contig_1	cds	404643	405545	-	ENBDON_00373	557	4.3e-200	1	1	0.987	UniRef:UniRef90_A0A098BQ60
contig_1	cds	405669	407054	+	ENBDON_00374	-	0	1	1	1	UniRef:UniRef100_M2Z8L1
contig_1	cds	407051	407788	+	ENBDON_00375	450	2.1e-159	1	1	0.943	UniRef:UniRef90_A0A098BNP3
contig_1	cds	407879	408463	-	ENBDON_00376	350	1.8e-121	1	1	0.974	UniRef:UniRef90_A0A098BQ57
contig_1	cds	408562	409188	-	ENBDON_00377	364	1.1e-126	1	0.963	1	UniRef:UniRef90_A0A098BRL8
contig_1	cds	409261	409665	-	ENBDON_00378	247	1.1e-82	1	0.993	0.933	UniRef:UniRef90_A0A098BQ65
contig_1	cds	409915	411435	-	ENBDON_00379	929	0	1.008	1	0.896	UniRef:UniRef90_M2Z8J6
contig_1	cds	411455	412012	-	ENBDON_00380	-	0	1	1	1	UniRef:UniRef100_A0A0M9WNU6
contig_1	cds	412009	412809	-	ENBDON_00381	481	7.8e-171	1	0.985	0.925	UniRef:UniRef90_A0A098BQ62
contig_1	cds	412882	413532	-	ENBDON_00382	380	1.3e-132	1	0.991	0.926	UniRef:UniRef90_M2ZTA6
contig_1	cds	413668	414681	+	ENBDON_00383	508	3.8e-179	1.018	0.977	0.886	UniRef:UniRef90_M2ZS00
contig_1	cds	414738	415580	-	ENBDON_00384	538	2.9e-192	1	0.812	0.95	UniRef:UniRef90_A0A0N0S075
contig_1	cds	415577	415765	-	ENBDON_00385	-	-	-	-	-	-
contig_1	cds	415738	416190	-	ENBDON_00386	-	0	1	1	1	UniRef:UniRef100_A0A0M9WL65
contig_1	tRNA	416365	416452	-	ENBDON_00387	66.5	-	-	-	-	-
contig_1	ncRNA	416570	416664	+	ENBDON_00388	65.1	1.4e-10	-	-	-	RFAM:RF00169
contig_1	cds	416714	418003	+	ENBDON_00389	828	7e-303	1	1	0.972	UniRef:UniRef90_A0A059MGB5
contig_1	cds	418325	419143	+	ENBDON_00390	509	8e-182	1	1	0.956	UniRef:UniRef90_M2XRF4
contig_1	cds	419362	419799	+	ENBDON_00391	275	1.5e-93	1	0.96	0.91	UniRef:UniRef90_A0A059MG10
contig_1	cds	419829	420713	-	ENBDON_00392	496	6.5e-176	1	1	0.929	UniRef:UniRef90_M2ZTA3
contig_1	cds	420710	421102	-	ENBDON_00393	230	2.8e-76	1	1	0.915	UniRef:UniRef90_UPI0022A8925C
contig_1	cds	421184	421675	+	ENBDON_00394	278	4e-94	1	1	0.951	UniRef:UniRef90_M2Z8H3
contig_1	cds	421819	422508	+	ENBDON_00395	-	0	1	1	1	UniRef:UniRef100_UPI00111EB7C1
contig_1	cds	422560	423135	+	ENBDON_00396	363	1.4e-126	1	0.95	0.958	UniRef:UniRef90_A0A098BNQ7
contig_1	cds	423175	423357	-	ENBDON_00397	-	0	1	1	1	UniRef:UniRef100_A0A0M8PPJ5
contig_1	cds	423577	423855	-	ENBDON_00398	-	0	1	1	1	UniRef:UniRef100_A0A0M9WNU7
contig_1	cds	424007	424282	-	ENBDON_00399	170	1.4e-53	1	1	0.923	UniRef:UniRef90_A0A098BQ80
contig_1	cds	424457	425578	-	ENBDON_00400	730	8.8e-266	1	0.979	0.938	UniRef:UniRef90_M2XRE2
contig_1	cds	425885	426214	+	ENBDON_00401	-	0	1	1	1	UniRef:UniRef100_A0A0M8PG93
contig_1	cds	426310	426522	+	ENBDON_00402	-	-	-	-	-	-
contig_1	cds	426748	427542	-	ENBDON_00403	-	0	1	1	1	UniRef:UniRef100_M2ZRY0
contig_1	cds	427617	429839	+	ENBDON_00404	993	0	1.02	1.02	0.85	UniRef:UniRef90_A0A098BRP0
contig_1	cds	429987	431402	+	ENBDON_00405	-	0	1	1	1	UniRef:UniRef100_A0A0M9WNU1
contig_1	cds	431495	432208	+	ENBDON_00406	431	4.7e-152	1	1	0.937	UniRef:UniRef90_A0A385HHE2
contig_1	cds	432255	433010	-	ENBDON_00407	451	1.3e-159	0.972	1	0.951	UniRef:UniRef90_UPI001CD832E6
contig_1	cds	433007	434428	-	ENBDON_00408	767	3.9e-277	1	0.975	0.913	UniRef:UniRef90_A0A098BQ84
contig_1	cds	434875	436380	+	ENBDON_00409	957	0	1	1	0.968	UniRef:UniRef90_A0A098BQ91
contig_1	cds	436579	438060	+	ENBDON_00410	857	0	1	0.89	0.933	UniRef:UniRef90_N1MAQ4
contig_1	cds	438057	440003	+	ENBDON_00411	1302	0	1	1	0.969	UniRef:UniRef90_M3A178
contig_1	cds	440009	440473	+	ENBDON_00412	278	2.3e-94	1	0.981	0.948	UniRef:UniRef90_M3A012
contig_1	cds	440470	441315	+	ENBDON_00413	481	1.1e-170	1	1	0.954	UniRef:UniRef90_M2ZG57
contig_1	cds	441435	442121	+	ENBDON_00414	-	0	1	1	1	UniRef:UniRef100_A0A0M9WNS4
contig_1	cds	442121	443335	+	ENBDON_00415	771	2.6e-281	1	0.998	0.988	UniRef:UniRef90_M2YWE3
contig_1	cds	443429	444061	+	ENBDON_00416	-	0	1	1	1	UniRef:UniRef100_M3A171
contig_1	cds	444058	444288	+	ENBDON_00417	150	4.2e-46	1	1	0.961	UniRef:UniRef90_A0A0M9WNT8
contig_1	cds	444399	444536	+	ENBDON_00418	92.8	2.9e-24	1	0.978	0.978	UniRef:UniRef90_A0A385HH45
contig_1	cds	444771	445457	+	ENBDON_00419	-	0	1	1	1	UniRef:UniRef100_M2ZG52
contig_1	cds	445502	447436	+	ENBDON_00420	1117	0	1	1	0.935	UniRef:UniRef90_A0A098BQA2
contig_1	cds	447433	448083	+	ENBDON_00421	373	5.7e-130	0.995	0.977	0.963	UniRef:UniRef90_A0A098BP93
contig_1	cds	448233	449447	+	ENBDON_00422	-	0	1	1	1	UniRef:UniRef100_A0A0M8PPI3
contig_1	cds	449491	451626	+	ENBDON_00423	1330	0	1	0.993	0.962	UniRef:UniRef90_N1MEY8
contig_1	cds	451711	453012	-	ENBDON_00424	858	0	1	1	0.97	UniRef:UniRef90_A0A059MGN1
contig_1	cds	453009	454442	-	ENBDON_00425	-	0	1	1	1	UniRef:UniRef100_UPI0025A17E0C
contig_1	cds	454579	455013	+	ENBDON_00426	-	0	1	1	1	UniRef:UniRef100_A0A0M8PG84
contig_1	cds	455010	455768	-	ENBDON_00427	-	0	1	1	1	UniRef:UniRef100_A0A0M9WNS0
contig_1	cds	455831	456169	+	ENBDON_00428	183	4.4e-58	1.009	1	0.903	UniRef:UniRef90_A0A7X9MN53
contig_1	cds	456179	456787	+	ENBDON_00429	-	0	1	1	1	UniRef:UniRef100_M2ZG41
contig_1	cds	456784	457341	+	ENBDON_00430	-	0	1	1	1	UniRef:UniRef100_UPI0025A03E7F
contig_1	cds	457442	458941	+	ENBDON_00431	-	0	1	1	1	UniRef:UniRef100_A0A0M9WNF5
contig_1	cds	458999	459973	-	ENBDON_00432	648	4.8e-235	1.003	0.964	0.985	UniRef:UniRef90_A0A098BQB0
contig_1	cds	459979	461493	-	ENBDON_00433	922	0	1	1	0.931	UniRef:UniRef90_A0A098BRS1
contig_1	cds	461623	462774	+	ENBDON_00434	739	2.2e-269	1	1	0.963	UniRef:UniRef90_N1MEI2
contig_1	cds	462778	463455	+	ENBDON_00435	-	0	1	1	1	UniRef:UniRef100_A0A0M8PFK4
contig_1	cds	463477	463572	-	ENBDON_00436	-	-	-	-	-	-
contig_1	cds	463649	464926	-	ENBDON_00437	770	6.6e-280	1.014	1	0.965	UniRef:UniRef90_A0A385HH25
contig_1	cds	465175	465339	+	ENBDON_00438	-	0	1	1	1	UniRef:UniRef100_UPI000B0EEEB0
contig_1	cds	465336	466115	+	ENBDON_00439	433	2.2e-152	1	1	0.931	UniRef:UniRef90_A0A098BQC4
contig_1	cds	466387	467970	+	ENBDON_00440	981	0	1	1	0.937	UniRef:UniRef90_A0A059MG90
contig_1	cds	468184	468582	+	ENBDON_00441	200	2.5e-64	1	1	0.795	UniRef:UniRef90_UPI00034BF22F
contig_1	cds	468627	468767	-	ENBDON_00442	80.5	2.3e-19	1	1	0.87	UniRef:UniRef90_A0A098BPB8
contig_1	cds	468807	468923	-	ENBDON_00443	70.5	1.3e-15	1	1	0.974	UniRef:UniRef90_A0A385HHA1
contig_1	cds	468982	469215	-	ENBDON_00444	-	0	1	1	1	UniRef:UniRef100_M2YWB9
contig_1	cds	469472	470188	+	ENBDON_00445	-	0	1	1	1	UniRef:UniRef100_A0A0M8PNT7
contig_1	cds	470354	471061	-	ENBDON_00446	409	1.4e-143	1	1	0.949	UniRef:UniRef90_A0A098BRU3
contig_1	cds	471054	472205	-	ENBDON_00447	734	4.3e-266	1	0.861	0.977	UniRef:UniRef90_N1M242
contig_1	cds	472464	473882	+	ENBDON_00448	889	0	1	0.979	0.985	UniRef:UniRef90_A0A098BPC0
contig_1	cds	473925	474476	+	ENBDON_00449	356	4.9e-124	0.967	0.894	0.977	UniRef:UniRef90_A0A098BNW6
contig_1	cds	474473	475255	-	ENBDON_00450	449	1.9e-158	1	1	0.9	UniRef:UniRef90_A0A098BQD5
contig_1	cds	475281	475655	-	ENBDON_00451	-	0	1	1	1	UniRef:UniRef100_A0A0M9WND8
contig_1	cds	475788	477596	-	ENBDON_00452	-	0	1	1	1	UniRef:UniRef100_M2ZG22
contig_1	cds	478663	479166	+	ENBDON_00453	-	-	-	-	-	-
contig_1	cds	479182	480351	-	ENBDON_00454	731	1.3e-265	1	0.944	0.985	UniRef:UniRef90_N1M0E6
contig_1	cds	480561	481826	+	ENBDON_00455	-	0	1	1	1	UniRef:UniRef100_A0A098BNX0
contig_1	cds	481830	482861	+	ENBDON_00456	611	8.1e-220	1	0.997	0.936	UniRef:UniRef90_A0A1D8T884
contig_1	cds	482953	483339	-	ENBDON_00457	-	0	1	1	1	UniRef:UniRef100_A0A0M9WNE6
contig_1	cds	483441	484016	+	ENBDON_00458	-	0	1	1	1	UniRef:UniRef100_A0A0M8PFV2
contig_1	cds	484090	484569	-	ENBDON_00459	-	0	1	1	1	UniRef:UniRef100_A0A0M8PIA6
contig_1	cds	484584	485474	-	ENBDON_00460	-	0	1	1	1	UniRef:UniRef100_A0A0M8PFJ2
contig_1	cds	485471	486382	-	ENBDON_00461	561	2.3e-201	1	1	0.97	UniRef:UniRef90_A0A098BQE4
contig_1	cds	486498	486947	+	ENBDON_00462	268	1.3e-90	0.993	0.993	0.946	UniRef:UniRef90_A0A098BRV9
contig_1	cds	486832	487350	-	ENBDON_00463	-	-	-	-	-	-
contig_1	cds	487347	487691	-	ENBDON_00464	224	2.4e-74	1	1	0.939	UniRef:UniRef90_UPI001F2BDC40
contig_1	cds	487670	488563	-	ENBDON_00465	-	-	-	-	-	-
contig_1	cds	489221	489586	+	ENBDON_00466	257	3e-87	1	1	0.992	UniRef:UniRef90_M3A125
contig_1	cds	489629	490252	-	ENBDON_00467	376	2.3e-131	0.995	0.986	0.927	UniRef:UniRef90_A0A098BQF0
contig_1	cds	490309	491550	+	ENBDON_00468	764	2.8e-278	1	1	0.939	UniRef:UniRef90_A0A098BRW3
contig_1	cds	491714	492226	+	ENBDON_00469	331	1.3e-114	1	0.934	0.976	UniRef:UniRef90_A0A098BQF7
contig_1	cds	492307	492714	+	ENBDON_00470	-	0	1	1	1	UniRef:UniRef100_UPI0025A049ED
contig_1	cds	492728	493408	-	ENBDON_00471	-	0	1	1	1	UniRef:UniRef100_M3A121
contig_1	cds	493476	494474	+	ENBDON_00472	619	3.1e-223	1.003	1	0.943	UniRef:UniRef90_A0A098BQF5
contig_1	cds	494471	494980	+	ENBDON_00473	-	0	1	1	1	UniRef:UniRef100_A0A0M8PFU6
contig_1	cds	495065	497497	-	ENBDON_00474	-	0	1	1	1	UniRef:UniRef100_M2XZD2
contig_1	cds	497535	498347	-	ENBDON_00475	-	0	1	1	1	UniRef:UniRef100_M2YW90
contig_1	cds	498527	498904	+	ENBDON_00476	248	1.5e-83	1	0.962	0.968	UniRef:UniRef90_A0A059MH13
contig_1	cds	498977	499306	+	ENBDON_00477	-	0	1	1	1	UniRef:UniRef100_M2ZZV7
contig_1	cds	499311	500120	+	ENBDON_00478	457	4.9e-161	1.074	1	0.886	UniRef:UniRef90_A0A059MGI3
contig_1	ncRNA-region	500160	500229	+	-	83.8	7.1e-12	-	-	-	RFAM:RF02992
contig_1	cds	500232	501287	+	ENBDON_00479	-	0	1	1	1	UniRef:UniRef100_M2XZC7
contig_1	cds	501312	503096	+	ENBDON_00480	-	0	1	1	1	UniRef:UniRef100_UPI000F527395
contig_1	cds	503100	503972	+	ENBDON_00481	548	9.1e-197	1	1	0.955	UniRef:UniRef90_N1M9L3
contig_1	cds	503972	504598	+	ENBDON_00482	421	3.3e-149	1	1	0.981	UniRef:UniRef90_A0A0M8PNS0
contig_1	cds	504595	505266	+	ENBDON_00483	436	1.2e-154	1	1	0.978	UniRef:UniRef90_A0A059MGI5
contig_1	cds	505263	506639	+	ENBDON_00484	853	0	0.998	0.998	0.939	UniRef:UniRef90_M2XZC3
contig_1	cds	506636	506755	+	ENBDON_00485	-	0	1	1	1	UniRef:UniRef100_A0A0M8PMK7
contig_1	cds	506757	507254	+	ENBDON_00486	294	2.6e-100	1	1	0.927	UniRef:UniRef90_A0A059MH21
contig_1	cds	507258	507515	+	ENBDON_00487	-	0	1	1	1	UniRef:UniRef100_A0A0M9WNL8
contig_1	cds	507512	509854	+	ENBDON_00488	1383	0	1	1	0.949	UniRef:UniRef90_A0A842H6G7
contig_1	cds	509851	510606	+	ENBDON_00489	-	0	1	1	1	UniRef:UniRef100_UPI0025A0C82D
contig_1	cds	510603	511283	+	ENBDON_00490	-	0	1	1	1	UniRef:UniRef100_A0A0M8PP87
contig_1	cds	511280	512365	+	ENBDON_00491	669	4.4e-242	1	1	0.981	UniRef:UniRef90_A0A0K2YKH8
contig_1	cds	512382	512654	+	ENBDON_00492	-	0	1	1	1	UniRef:UniRef100_A0A0M9WNN3
contig_1	cds	512682	513815	+	ENBDON_00493	773	5.3e-283	1	1	0.992	UniRef:UniRef90_A0A059MGJ2
contig_1	cds	513849	514574	+	ENBDON_00494	481	7e-172	1	0.96	0.988	UniRef:UniRef90_M2XZB3
contig_1	cds	514581	515333	-	ENBDON_00495	462	4.1e-164	1	1	0.94	UniRef:UniRef90_A0A6H1BUH5
contig_1	cds	515330	516088	-	ENBDON_00496	419	3.9e-147	1	1	0.921	UniRef:UniRef90_A0A6H1BUP1
contig_1	cds	516085	516444	-	ENBDON_00497	210	1.1e-68	1	1	0.992	UniRef:UniRef90_M2ZZU1
contig_1	cds	516441	517130	-	ENBDON_00498	379	6.8e-132	1	1	0.943	UniRef:UniRef90_N1MHE6
contig_1	cds	517376	517768	+	ENBDON_00499	-	0	1	1	1	UniRef:UniRef100_UPI0025A0B0E5
contig_1	cds	517885	518319	-	ENBDON_00500	-	0	1	1	1	UniRef:UniRef100_A0A0M9WNM3
contig_1	cds	518319	518441	-	ENBDON_00501	-	-	-	-	-	-
contig_1	cds	518459	518779	+	ENBDON_00502	207	1.1e-67	1	0.972	0.943	UniRef:UniRef90_A0A2D2A1I8
contig_1	cds	518779	519516	+	ENBDON_00503	444	8.9e-157	1	0.953	0.98	UniRef:UniRef90_A0A2D2A5P4
contig_1	cds	519516	519857	+	ENBDON_00504	206	4.7e-67	1	0.991	0.92	UniRef:UniRef90_A0A0N0S0V7
contig_1	cds	519885	520730	-	ENBDON_00505	561	4.2e-202	1	1	0.986	UniRef:UniRef90_M2XZA8
contig_1	cds	520950	522290	-	ENBDON_00506	-	0	1	1	1	UniRef:UniRef100_A0A0M8PNE4
contig_1	cds	522316	523839	-	ENBDON_00507	922	0	1.008	1	0.894	UniRef:UniRef90_N1MBY7
contig_1	cds	523888	525054	-	ENBDON_00508	734	3.1e-267	0.997	0.997	0.972	UniRef:UniRef90_A0A098BRX9
contig_1	cds	525299	525823	+	ENBDON_00509	334	1.2e-115	1	0.874	0.989	UniRef:UniRef90_A0A098BQH3
contig_1	cds	525820	527325	+	ENBDON_00510	988	0	1	0.986	0.956	UniRef:UniRef90_A0A098BPE8
contig_1	cds	527322	529037	+	ENBDON_00511	1127	0	1	1	0.991	UniRef:UniRef90_A0A098BP00
contig_1	cds	529018	529656	+	ENBDON_00512	432	1.2e-153	1	1	0.981	UniRef:UniRef90_A0A098BQH5
contig_1	cds	529672	530469	-	ENBDON_00513	-	0	1	1	1	UniRef:UniRef100_M2ZZS8
contig_1	cds	530472	531266	-	ENBDON_00514	-	0	1	1	1	UniRef:UniRef100_UPI000F52BBC8
contig_1	cds	531401	531832	+	ENBDON_00515	-	0	1	1	1	UniRef:UniRef100_UPI0025A16387
contig_1	cds	531909	533369	+	ENBDON_00516	976	0	1	0.978	0.953	UniRef:UniRef90_A0A098BPF2
contig_1	cds	533665	534138	+	ENBDON_00517	-	0	1	1	1	UniRef:UniRef100_A0A0M8PP74
contig_1	cds	534294	535103	+	ENBDON_00518	-	0	1	1	1	UniRef:UniRef100_M2ZZS3
contig_1	cds	535191	536966	+	ENBDON_00519	1117	0	0.998	0.977	0.929	UniRef:UniRef90_A0A098BRY8
contig_1	cds	537093	538541	+	ENBDON_00520	915	0	1.002	1	0.932	UniRef:UniRef90_A0A059MGW9
contig_1	cds	538567	539328	+	ENBDON_00521	485	3.9e-173	0.968	1	0.98	UniRef:UniRef90_A0A0M8PFX3
contig_1	cds	539335	540354	-	ENBDON_00522	-	0	1	1	1	UniRef:UniRef100_UPI0025A0378C
contig_1	tRNA	540456	540529	-	ENBDON_00523	75.2	-	-	-	-	-
contig_1	cds	540584	541537	-	ENBDON_00524	-	0	1	1	1	UniRef:UniRef100_A0A0M8PMJ1
contig_1	cds	541603	542079	+	ENBDON_00525	-	0	1	1	1	UniRef:UniRef100_A0A0M9WNM5
contig_1	cds	542122	544626	-	ENBDON_00526	1421	0	0.899	0.951	0.969	UniRef:UniRef90_A0A2D2A1K5
contig_1	cds	544775	545098	+	ENBDON_00527	-	0	1	1	1	UniRef:UniRef100_A0A0M9WNL4
contig_1	cds	545120	546259	-	ENBDON_00528	-	0	1	1	1	UniRef:UniRef100_A0A0M8PND2
contig_1	cds	546256	547269	-	ENBDON_00529	-	0	1	1	1	UniRef:UniRef100_M2ZZR3
contig_1	cds	547312	547476	+	ENBDON_00530	-	0	1	1	1	UniRef:UniRef100_N1MCT2
contig_1	cds	547482	547961	+	ENBDON_00531	-	0	1	1	1	UniRef:UniRef100_A0A0N0S0S2
contig_1	cds	548021	548809	+	ENBDON_00532	-	0	1	1	1	UniRef:UniRef100_M2YW43
contig_1	cds	548876	549550	-	ENBDON_00533	-	0	1	1	1	UniRef:UniRef100_A0A059MH55
contig_1	cds	549749	550000	-	ENBDON_00534	-	0	1	1	1	UniRef:UniRef100_A0A098BQJ6
contig_1	cds	550091	550885	+	ENBDON_00535	-	0	1	1	1	UniRef:UniRef100_M2ZFV2
contig_1	cds	550890	551546	+	ENBDON_00536	416	9.8e-147	1	1	0.991	UniRef:UniRef90_A0A098BP25
contig_1	cds	551543	552241	+	ENBDON_00537	-	0	1	1	1	UniRef:UniRef100_M2YW38
contig_1	cds	552238	553428	+	ENBDON_00538	-	0	1	1	1	UniRef:UniRef100_M3A0U4
contig_1	cds	553441	554385	-	ENBDON_00539	-	0	1	1	1	UniRef:UniRef100_UPI0025A181C7
contig_1	cds	554394	554894	-	ENBDON_00540	-	0	1	1	1	UniRef:UniRef100_A0A098BPG7
contig_1	cds	554891	556108	-	ENBDON_00541	-	0	1	1	1	UniRef:UniRef100_UPI0025A1F5FB
contig_1	cds	556302	557675	+	ENBDON_00542	-	0	1	1	1	UniRef:UniRef100_A0A0M8PG86
contig_1	cds	557746	559683	-	ENBDON_00543	1251	0	1	0.869	0.952	UniRef:UniRef90_A0A098BS16
contig_1	cds	559887	560636	+	ENBDON_00544	-	0	1	1	1	UniRef:UniRef100_A0A0M8PEZ8
contig_1	ncRNA	560688	560994	-	ENBDON_00545	184.9	7.6e-24	-	-	-	RFAM:RF02566
contig_1	cds	561048	561890	-	ENBDON_00546	-	0	1	1	1	UniRef:UniRef100_A0A0M8PCF2
contig_1	ncRNA-region	562041	562115	+	-	73.1	1.1e-07	-	-	-	RFAM:RF01066
contig_1	cds	562236	563309	+	ENBDON_00547	-	0	1	1	1	UniRef:UniRef100_A0A0M9WLN9
contig_1	cds	563306	564478	+	ENBDON_00548	726	1.3e-263	0.995	0.987	0.974	UniRef:UniRef90_M2YW30
contig_1	cds	564475	565275	+	ENBDON_00549	402	1.1e-139	1	1	0.947	UniRef:UniRef90_M3A0T7
contig_1	cds	565272	565871	+	ENBDON_00550	342	4.4e-118	0.995	0.943	0.975	UniRef:UniRef90_A0A8D4K6T1
contig_1	cds	565914	566117	+	ENBDON_00551	-	0	1	1	1	UniRef:UniRef100_A0A0N0S0C8
contig_1	cds	566114	566449	+	ENBDON_00552	190	7.1e-61	1	1	0.982	UniRef:UniRef90_A0A098BP40
contig_1	cds	566479	566790	+	ENBDON_00553	172	5.8e-54	0.99	0.895	0.941	UniRef:UniRef90_A0A2D2A1M5
contig_1	cds	566796	569141	-	ENBDON_00554	1506	0	1	1	0.977	UniRef:UniRef90_A0A098BS26
contig_1	cds	569533	569736	+	ENBDON_00555	-	0	1	1	1	UniRef:UniRef100_A0A059MGJ0
contig_1	cds	569866	570453	+	ENBDON_00556	-	0	1	1	1	UniRef:UniRef100_M2ZFT8
contig_1	cds	570589	573504	+	ENBDON_00557	1702	0	0.976	0.96	0.945	UniRef:UniRef90_A0A098BP44
contig_1	cds	573617	574210	+	ENBDON_00558	360	6.5e-125	1	0.879	0.944	UniRef:UniRef90_A0A385HHC6
contig_1	cds	574215	574460	-	ENBDON_00559	79.3	7.9e-18	1	0.931	0.519	UniRef:UniRef90_UPI000AA229B0
contig_1	cds	574558	575883	+	ENBDON_00560	706	1.9e-254	0.941	1	0.952	UniRef:UniRef90_A0A098BQM0
contig_1	tRNA	575949	576021	+	ENBDON_00561	79.8	-	-	-	-	-
contig_1	cds	576142	576255	+	ENBDON_00562	62.4	2e-12	1	1	0.946	UniRef:UniRef90_A0A098BPI0
contig_1	cds	576314	576511	+	ENBDON_00563	-	0	1	1	1	UniRef:UniRef100_UPI00029B4298
contig_1	rRNA	577037	578559	+	ENBDON_00564	1583.1	6.7e-48	-	-	-	RFAM:RF00177
contig_1	rRNA	578859	581992	+	ENBDON_00565	2802	5.2e-05	-	-	-	RFAM:RF02541
contig_1	rRNA	582151	582267	+	ENBDON_00566	89.9	3.6e-14	-	-	-	RFAM:RF00001
contig_1	cds	582375	582800	-	ENBDON_00567	257	1.4e-86	0.979	0.972	0.92	UniRef:UniRef90_A0A098BP54
contig_1	cds	582953	583594	+	ENBDON_00568	-	0	1	1	1	UniRef:UniRef100_M2ZB73
contig_1	cds	583591	584862	+	ENBDON_00569	732	5.3e-265	1	1.002	0.939	UniRef:UniRef90_A0A098BQN2
contig_1	cds	584867	586282	-	ENBDON_00570	949	0	0.998	0.998	0.972	UniRef:UniRef90_A0A059MTL9
contig_1	cds	586225	590139	-	ENBDON_00571	2424	0	1	1	0.951	UniRef:UniRef90_A0A098BP59
contig_1	ncRNA-region	590385	590500	+	-	110.2	1.2e-15	-	-	-	RFAM:RF00634
contig_1	cds	590567	591886	+	ENBDON_00572	822	1e-299	1	0.93	0.964	UniRef:UniRef90_N1M2N9
contig_1	cds	591933	592406	-	ENBDON_00573	305	3.8e-105	1	1	0.987	UniRef:UniRef90_N1M217
contig_1	cds	592502	593023	-	ENBDON_00574	325	1.5e-112	1	1	0.936	UniRef:UniRef90_A0A098BQN7
contig_1	cds	593171	594001	+	ENBDON_00575	-	0	1	1	1	UniRef:UniRef100_A0A0M8PJG8
contig_1	cds	594141	594584	+	ENBDON_00576	-	-	-	-	-	-
contig_1	cds	594563	595126	+	ENBDON_00577	-	-	-	-	-	-
contig_1	cds	595181	595672	-	ENBDON_00578	-	0	1	1	1	UniRef:UniRef100_A0A2D2A1P1
contig_1	cds	595846	597249	+	ENBDON_00579	783	6.6e-284	1	0.998	0.925	UniRef:UniRef90_A0A059MTQ7
contig_1	cds	597240	598280	+	ENBDON_00580	646	9.5e-234	0.997	0.997	0.942	UniRef:UniRef90_A0A842H6K4
contig_1	cds	598283	599281	+	ENBDON_00581	-	0	1	1	1	UniRef:UniRef100_UPI0009BD9068
contig_1	cds	599293	599856	+	ENBDON_00582	-	0	1	1	1	UniRef:UniRef100_A0A098BQP5
contig_1	cds	599844	602012	-	ENBDON_00583	1212	0	0.884	0.837	0.973	UniRef:UniRef90_A0A098BS58
contig_1	cds	602240	604588	+	ENBDON_00584	1406	0	1.006	1	0.959	UniRef:UniRef90_A0A385HHI0
contig_1	cds	604621	605274	+	ENBDON_00585	-	0	1	1	1	UniRef:UniRef100_A0A0N0S196
contig_1	cds	605271	606128	+	ENBDON_00586	-	0	1	1	1	UniRef:UniRef100_A0A0M8PR66
contig_1	cds	606125	606493	+	ENBDON_00587	-	0	1	1	1	UniRef:UniRef100_A0A0M9WQ71
contig_1	cds	606490	607014	+	ENBDON_00588	333	1.5e-115	1	1	0.931	UniRef:UniRef90_A0A098BS63
contig_1	cds	607014	607478	+	ENBDON_00589	-	0	1	1	1	UniRef:UniRef100_A0A0M9WQ51
contig_1	cds	607609	608472	+	ENBDON_00590	452	6.8e-159	1.031	0.99	0.932	UniRef:UniRef90_M2ZY69
contig_1	cds	608601	609536	+	ENBDON_00591	-	0	1	1	1	UniRef:UniRef100_A0A0M9WQ62
contig_1	cds	609529	610470	+	ENBDON_00592	580	9.4e-209	1	0.991	0.946	UniRef:UniRef90_A0A098BQQ5
contig_1	cds	610502	610939	+	ENBDON_00593	-	0	1	1	1	UniRef:UniRef100_A0A098BS69
contig_1	cds	610942	611784	+	ENBDON_00594	-	0	1	1	1	UniRef:UniRef100_A0A0M8PJA2
contig_1	cds	611872	612315	+	ENBDON_00595	-	0	1	1	1	UniRef:UniRef100_A0A0M9WQ60
contig_1	cds	612392	613900	+	ENBDON_00596	982	0	1	0.964	0.986	UniRef:UniRef90_A0A098BP88
contig_1	cds	614003	614359	+	ENBDON_00597	-	0	1	1	1	UniRef:UniRef100_A0A0M8PR71
contig_1	cds	614580	616010	+	ENBDON_00598	942	0	1	0.87	0.985	UniRef:UniRef90_M2YUM0
contig_1	cds	616267	618792	+	ENBDON_00599	-	0	1	1	1	UniRef:UniRef100_A0A098BQR2
contig_1	cds	618863	619456	-	ENBDON_00600	375	1.4e-131	1	1	0.924	UniRef:UniRef90_A0A0M8PQG8
contig_1	cds	619551	620498	+	ENBDON_00601	544	4.3e-194	0.997	0.966	0.92	UniRef:UniRef90_A0A098BP94
contig_1	cds	620508	621311	-	ENBDON_00602	493	2e-175	0.97	0.935	0.946	UniRef:UniRef90_A0A098BQR4
contig_1	cds	621388	622587	+	ENBDON_00603	-	0	1	1	1	UniRef:UniRef100_UPI0025A14079
contig_1	cds	622606	625452	-	ENBDON_00604	1783	0	1	1	0.992	UniRef:UniRef90_A0A385HHG5
contig_1	cds	625500	626117	-	ENBDON_00605	-	0	1	1	1	UniRef:UniRef100_A0A0M9WQ77
contig_1	cds	626297	626737	+	ENBDON_00606	-	0	1	1	1	UniRef:UniRef100_A0A0M8PS50
contig_1	cds	626801	627304	-	ENBDON_00607	334	3e-116	1	1	0.916	UniRef:UniRef90_A0A098BQR9
contig_1	cds	627315	627641	-	ENBDON_00608	-	0	1	1	1	UniRef:UniRef100_A0A0M9WQ66
contig_1	cds	627674	628417	+	ENBDON_00609	517	5.7e-186	1	0.988	0.972	UniRef:UniRef90_A0A098BQS0
contig_1	cds	628425	629300	-	ENBDON_00610	-	0	1	1	1	UniRef:UniRef100_A0A0M8PQH3
contig_1	cds	629396	630022	+	ENBDON_00611	-	0	1	1	1	UniRef:UniRef100_M2ZEB6
contig_1	cds	630081	630854	+	ENBDON_00612	-	0	1	1	1	UniRef:UniRef100_A0A0M8PIV8
contig_1	cds	630894	631979	-	ENBDON_00613	-	0	1	1	1	UniRef:UniRef100_A0A0M9WQA4
contig_1	cds	632215	632637	+	ENBDON_00614	-	-	-	-	-	-
contig_1	cds	632646	633893	-	ENBDON_00615	757	2.6e-275	1	1	0.947	UniRef:UniRef90_A0A2D2A1R8
contig_1	cds	633919	635331	-	ENBDON_00616	-	0	1	1	1	UniRef:UniRef100_A0A0M9WQ59
contig_1	cds	635439	636077	-	ENBDON_00617	-	0	1	1	1	UniRef:UniRef100_A0A0M8PS54
contig_1	cds	636364	636852	+	ENBDON_00618	-	0	1	1	1	UniRef:UniRef100_A0A059MU61
contig_1	cds	636880	637572	+	ENBDON_00619	-	0	1	1	1	UniRef:UniRef100_M2ZZ87
contig_1	cds	637573	638049	+	ENBDON_00620	-	0	1	1	1	UniRef:UniRef100_A0A0M9WQ68
contig_1	cds	638061	639455	+	ENBDON_00621	946	0	1	0.994	0.991	UniRef:UniRef90_A0A098BPB5
contig_1	cds	639455	640417	+	ENBDON_00622	584	5.8e-210	0.997	0.973	0.966	UniRef:UniRef90_A0A385HHI2
contig_1	cds	640536	641006	+	ENBDON_00623	301	2.4e-103	0.994	0.994	0.923	UniRef:UniRef90_A0A098BSA1
contig_1	cds	641019	641888	-	ENBDON_00624	567	1e-203	1	0.895	0.99	UniRef:UniRef90_M2ZZ84
contig_1	cds	642062	642742	+	ENBDON_00625	-	0	1	1	1	UniRef:UniRef100_A0A0M8PIW3
contig_1	cds	642802	643452	+	ENBDON_00626	408	1.4e-143	1	0.952	0.981	UniRef:UniRef90_A0A098BPC3
contig_1	cds	644069	646108	+	ENBDON_00627	1226	0	1	0.908	0.957	UniRef:UniRef90_A0A8D4K0H0
contig_1	cds	646096	646599	+	ENBDON_00628	-	0	1	1	1	UniRef:UniRef100_A0A0M8PJC0
contig_1	cds	646580	647710	+	ENBDON_00629	-	0	1	1	1	UniRef:UniRef100_M2ZZ80
contig_1	cds	647721	648761	+	ENBDON_00630	665	3.2e-241	1	1	0.988	UniRef:UniRef90_A0A098BPK8
contig_1	cds	648758	649999	+	ENBDON_00631	787	5.5e-287	1	0.96	0.981	UniRef:UniRef90_A0A098BPC7
contig_1	cds	650023	650481	+	ENBDON_00632	-	0	1	1	1	UniRef:UniRef100_A0A0M8PR89
contig_1	cds	650478	651503	+	ENBDON_00633	-	0	1	1	1	UniRef:UniRef100_M2YUJ2
contig_1	cds	651515	652915	+	ENBDON_00634	917	0	1	1	0.981	UniRef:UniRef90_A0A098BQU5
contig_1	cds	652912	654327	+	ENBDON_00635	901	0	1	1	0.975	UniRef:UniRef90_A0A0M9WQ90
contig_1	cds	654329	655234	+	ENBDON_00636	-	0	1	1	1	UniRef:UniRef100_A0A0M8PQI4
contig_1	cds	655224	656144	+	ENBDON_00637	598	3.4e-216	1	1	0.984	UniRef:UniRef90_A0A098BQU6
contig_1	cds	656149	657939	+	ENBDON_00638	-	0	1	1	1	UniRef:UniRef100_UPI0003475D4D
contig_1	cds	657949	659292	+	ENBDON_00639	766	9.7e-278	1	1	0.962	UniRef:UniRef90_A0A098BQV0
contig_1	cds	659289	660641	+	ENBDON_00640	881	0	1	1	0.998	UniRef:UniRef90_A0A098BPL0
contig_1	cds	660638	661483	+	ENBDON_00641	529	1.3e-189	1	1	0.982	UniRef:UniRef90_A0A098BPE0
contig_1	cds	661480	663006	+	ENBDON_00642	1016	0	1	1	0.984	UniRef:UniRef90_A0A098BQV1
contig_1	cds	663035	664468	+	ENBDON_00643	-	0	1	1	1	UniRef:UniRef100_A0A0M8PS66
contig_1	cds	664634	665899	+	ENBDON_00644	-	0	1	1	1	UniRef:UniRef100_UPI0025A1F8AD
contig_1	cds	665887	669462	-	ENBDON_00645	2214	0	1.006	0.984	0.938	UniRef:UniRef90_A0A098BPL1
contig_1	cds	669570	670484	-	ENBDON_00646	478	2e-168	0.997	0.997	0.957	UniRef:UniRef90_A0A098BQV6
contig_1	cds	670481	671398	-	ENBDON_00647	-	0	1	1	1	UniRef:UniRef100_A0A0M8PQJ0
contig_1	cds	671429	672481	-	ENBDON_00648	538	1.9e-190	1.066	1	0.845	UniRef:UniRef90_A0A385HHQ0
contig_1	cds	672579	673745	+	ENBDON_00649	743	9.7e-271	1	1	0.997	UniRef:UniRef90_A0A098BPE9
contig_1	cds	673733	676327	-	ENBDON_00650	-	0	1	1	1	UniRef:UniRef100_A0A0M8PIX4
contig_1	cds	676421	677083	-	ENBDON_00651	-	0	1	1	1	UniRef:UniRef100_A0A098BSD2
contig_1	cds	677176	679320	+	ENBDON_00652	1264	0	1.001	1	0.922	UniRef:UniRef90_N1MAY4
contig_1	cds	679386	680444	+	ENBDON_00653	597	3.4e-214	1	1	0.906	UniRef:UniRef90_A0A5M3Y7T7
contig_1	cds	680429	681580	+	ENBDON_00654	-	0	1	1	1	UniRef:UniRef100_M2ZZ39
contig_1	cds	681595	682632	+	ENBDON_00655	687	5.4e-250	0.997	0.98	0.968	UniRef:UniRef90_A0A098BQW6
contig_1	cds	682629	683030	+	ENBDON_00656	246	1.9e-82	1	1	0.925	UniRef:UniRef90_A0A098BSD7
contig_1	cds	683027	684199	+	ENBDON_00657	726	5.8e-264	0.997	0.997	0.956	UniRef:UniRef90_A0A098BQW7
contig_1	cds	684281	684997	+	ENBDON_00658	-	0	1	1	1	UniRef:UniRef100_A0A098BPL4
contig_1	cds	685056	685874	+	ENBDON_00659	-	0	1	1	1	UniRef:UniRef100_M2ZZ33
contig_1	cds	685952	686935	+	ENBDON_00660	-	0	1	1	1	UniRef:UniRef100_UPI0025A0AEF3
contig_1	cds	686932	687735	+	ENBDON_00661	502	3e-179	1	1	0.993	UniRef:UniRef90_A0A098BSE3
contig_1	cds	687881	691837	+	ENBDON_00662	2491	0	1.001	0.998	0.933	UniRef:UniRef90_A0A098BQX2
contig_1	cds	691853	692323	-	ENBDON_00663	307	6.2e-106	1	1	0.968	UniRef:UniRef90_A0A098BPL5
contig_1	cds	692460	692807	-	ENBDON_00664	199	3e-64	1	1	0.939	UniRef:UniRef90_M2ZE31
contig_1	cds	692913	693986	-	ENBDON_00665	657	8.4e-238	1	1	0.908	UniRef:UniRef90_A0A098BQX6
contig_1	cds	694087	695124	-	ENBDON_00666	692	9e-252	1	1	0.957	UniRef:UniRef90_A0A098BSE7
contig_1	cds	695121	696686	-	ENBDON_00667	954	0	1	1	0.919	UniRef:UniRef90_A0A059MTS5
contig_1	cds	696788	697024	-	ENBDON_00668	-	0	1	1	1	UniRef:UniRef100_A0A0M9WQ82
contig_1	cds	697319	698752	+	ENBDON_00669	938	0	1	1	0.935	UniRef:UniRef90_A0A098BPG9
contig_1	cds	698987	699889	+	ENBDON_00670	340	4.1e-114	1	1	0.883	UniRef:UniRef90_A0A098BQY1
contig_1	cds	699886	700305	+	ENBDON_00671	252	1.6e-84	1	1	0.971	UniRef:UniRef90_M2XX50
contig_1	cds	700302	700898	+	ENBDON_00672	-	-	-	-	-	-
contig_1	cds	701035	701250	-	ENBDON_00673	75.1	1.7e-16	1.014	1	0.806	UniRef:UniRef90_N1MF78
contig_1	cds	701444	701725	+	ENBDON_00674	-	0	1	1	1	UniRef:UniRef100_UPI0025A17643
contig_1	cds	701934	702875	-	ENBDON_00675	536	4e-191	1	1	0.917	UniRef:UniRef90_A0A098BQY5
contig_1	cds	703013	703759	+	ENBDON_00676	-	0	1	1	1	UniRef:UniRef100_UPI0025A141BD
contig_1	cds	703756	704259	+	ENBDON_00677	329	4.1e-114	1	1	0.982	UniRef:UniRef90_M2XX45
contig_1	cds	704321	705334	-	ENBDON_00678	660	1.4e-239	0.964	1	0.991	UniRef:UniRef90_M2YUC9
contig_1	cds	705544	706905	+	ENBDON_00679	807	8e-294	0.982	0.98	0.946	UniRef:UniRef90_N1MAR9
contig_1	cds	707150	707929	-	ENBDON_00680	447	5e-158	1	1	0.903	UniRef:UniRef90_A0A5M3Y9J4
contig_1	cds	708087	710660	+	ENBDON_00681	1605	0	0.999	0.999	0.944	UniRef:UniRef90_N1MEB9
contig_1	cds	710694	712439	-	ENBDON_00682	1126	0	1.005	1	0.932	UniRef:UniRef90_A0A098BPI3
contig_1	cds	712495	713355	-	ENBDON_00683	531	9.3e-190	1	0.941	0.923	UniRef:UniRef90_A0A098BQZ4
contig_1	cds	713406	715118	-	ENBDON_00684	1106	0	1	0.945	0.967	UniRef:UniRef90_A0A098BSG1
contig_1	cds	715249	716034	+	ENBDON_00685	499	2.6e-178	1	0.949	0.958	UniRef:UniRef90_A0A098BQZ8
contig_1	cds	716064	716993	+	ENBDON_00686	585	6.5e-211	1	1	0.984	UniRef:UniRef90_Q0S816
contig_1	cds	716999	718057	+	ENBDON_00687	-	0	1	1	1	UniRef:UniRef100_A0A0M9WQ83
contig_1	cds	718159	718470	-	ENBDON_00688	-	0	1	1	1	UniRef:UniRef100_UPI0025A215CB
contig_1	cds	718609	720042	-	ENBDON_00689	940	0	1	1	0.948	UniRef:UniRef90_M2ZYZ2
contig_1	cds	720506	721198	-	ENBDON_00690	-	0	1	1	1	UniRef:UniRef100_A0A0M9WQ55
contig_1	cds	721195	722436	-	ENBDON_00691	-	0	1	1	1	UniRef:UniRef100_M2ZE01
contig_1	cds	722666	723061	+	ENBDON_00692	138	1.1e-39	1	1	0.969	UniRef:UniRef90_A0A0M8PR54
contig_1	cds	723148	724656	+	ENBDON_00693	987	0	1	0.998	0.994	UniRef:UniRef90_A0A098BPM1
contig_1	cds	724822	725466	-	ENBDON_00694	424	3.2e-150	1	1	0.949	UniRef:UniRef90_A0A5M3Y614
contig_1	cds	726141	726797	+	ENBDON_00695	417	2.4e-147	1	1	0.991	UniRef:UniRef90_A0A0M8PJ88
contig_1	cds	726827	728086	+	ENBDON_00696	793	3.4e-289	1	1	0.95	UniRef:UniRef90_A0A098BVN0
contig_1	cds	728545	729876	+	ENBDON_00697	887	0	1	1	0.998	UniRef:UniRef90_M2XX23
contig_1	cds	730084	730461	+	ENBDON_00698	-	0	1	1	1	UniRef:UniRef100_UPI0025A0EF65
contig_1	cds	730727	731092	-	ENBDON_00699	-	0	1	1	1	UniRef:UniRef100_UPI0025A01563
contig_1	cds	731220	732020	-	ENBDON_00700	-	-	-	-	-	-
contig_1	cds	732058	732339	-	ENBDON_00701	-	0	1	1	1	UniRef:UniRef100_M2ZYX4
contig_1	cds	732723	733568	-	ENBDON_00702	-	0	1	1	1	UniRef:UniRef100_UPI0025A0A7A7
contig_1	cds	733760	733990	-	ENBDON_00703	152	3.6e-47	1	1	0.987	UniRef:UniRef90_UPI0009BE8C29
contig_1	cds	733987	734280	-	ENBDON_00704	-	0	1	1	1	UniRef:UniRef100_UPI0025A27512
contig_1	cds	734638	734730	+	ENBDON_00705	44.7	1.4e-05	1	1	0.733	UniRef:UniRef90_A0A1B1K7B2
contig_1	cds	734927	735733	-	ENBDON_00706	473	1.2e-167	1	1	0.985	UniRef:UniRef90_M2YU94
contig_1	cds	735730	736656	-	ENBDON_00707	-	0	1	1	1	UniRef:UniRef100_UPI0025A1962A
contig_1	cds	737898	738182	+	ENBDON_00708	-	0	1	1	1	UniRef:UniRef100_M2ZDY4
contig_1	cds	738256	738594	-	ENBDON_00709	-	0	1	1	1	UniRef:UniRef100_M2XX07
contig_1	cds	738597	739739	-	ENBDON_00710	-	0	1	1	1	UniRef:UniRef100_A0A0M9WQ40
contig_1	cds	739930	741105	+	ENBDON_00711	780	8.7e-285	1	0.951	0.982	UniRef:UniRef90_A0A098BPM2
contig_1	cds	741117	742001	+	ENBDON_00712	574	7.4e-207	0.997	0.967	0.956	UniRef:UniRef90_A0A098BPJ6
contig_1	cds	742003	742905	+	ENBDON_00713	-	0	1	1	1	UniRef:UniRef100_A0A0M9WQ45
contig_1	cds	742902	743477	+	ENBDON_00714	-	0	1	1	1	UniRef:UniRef100_M2XX00
contig_1	cds	743505	744041	-	ENBDON_00715	-	0	1	1	1	UniRef:UniRef100_UPI0025A22CBB
contig_1	cds	744038	744724	-	ENBDON_00716	412	9.4e-145	1	0.927	1	UniRef:UniRef90_A0A098BPM3
contig_1	cds	744801	745529	-	ENBDON_00717	-	0	1	1	1	UniRef:UniRef100_UPI0025A01C6C
contig_1	cds	745690	746565	-	ENBDON_00718	-	0	1	1	1	UniRef:UniRef100_UPI0025A13206
contig_1	cds	746760	748190	-	ENBDON_00719	-	0	1	1	1	UniRef:UniRef100_UPI0025A15FAB
contig_1	cds	748491	749540	-	ENBDON_00720	-	0	1	1	1	UniRef:UniRef100_UPI0025A0C06D
contig_1	cds	749537	750505	-	ENBDON_00721	555	2.7e-198	1	1	0.925	UniRef:UniRef90_A0A098BPN0
contig_1	cds	750502	751662	-	ENBDON_00722	-	0	1	1	1	UniRef:UniRef100_M2ZXN8
contig_1	cds	751662	752549	-	ENBDON_00723	-	0	1	1	1	UniRef:UniRef100_A0A098BR25
contig_1	cds	752546	754093	-	ENBDON_00724	957	0	1	1	0.942	UniRef:UniRef90_N1MA21
contig_1	cds	754138	755361	+	ENBDON_00725	-	0	1	1	1	UniRef:UniRef100_A0A0N0S184
contig_1	cds	755358	756158	+	ENBDON_00726	-	0	1	1	1	UniRef:UniRef100_UPI0025A1B6BA
contig_1	cds	756225	756827	+	ENBDON_00727	-	0	1	1	1	UniRef:UniRef100_A0A0M8PLI7
contig_1	cds	756861	758009	+	ENBDON_00728	-	0	1	1	1	UniRef:UniRef100_UPI0025A21159
contig_1	cds	758076	758480	-	ENBDON_00729	-	0	1	1	1	UniRef:UniRef100_UPI0025A05572
contig_1	cds	758543	759940	-	ENBDON_00730	909	0	1	0.996	0.966	UniRef:UniRef90_A0A098BPQ7
contig_1	cds	760029	760613	+	ENBDON_00731	-	0	1	1	1	UniRef:UniRef100_A0A0M8PQC9
contig_1	cds	760613	760906	+	ENBDON_00732	-	0	1	1	1	UniRef:UniRef100_A0A098BR35
contig_1	cds	760998	762077	-	ENBDON_00733	653	8.6e-236	0.989	0.97	0.975	UniRef:UniRef90_N1M5J9
contig_1	cds	762074	762850	-	ENBDON_00734	-	0	1	1	1	UniRef:UniRef100_A0A0M8PS05
contig_1	cds	762847	763728	-	ENBDON_00735	557	3.6e-200	1	1	0.935	UniRef:UniRef90_A0A0M9WQ33
contig_1	cds	763748	764509	-	ENBDON_00736	491	2.7e-175	1	1	0.984	UniRef:UniRef90_A0A098BSJ1
contig_1	cds	764660	765574	+	ENBDON_00737	552	1.4e-197	1	0.95	0.977	UniRef:UniRef90_A0A379M4W0
contig_1	cds	765633	766292	-	ENBDON_00738	402	5.2e-141	1	0.944	0.945	UniRef:UniRef90_A0A0M8PIQ4
contig_1	cds	766372	766845	-	ENBDON_00739	312	6.9e-108	1	1	0.943	UniRef:UniRef90_A0A098BPP4
contig_1	cds	766847	768010	-	ENBDON_00740	736	8.4e-268	1	0.965	0.972	UniRef:UniRef90_UPI0019D0CAE1
contig_1	cds	768193	769446	+	ENBDON_00741	831	3.8e-304	1	0.95	0.964	UniRef:UniRef90_A0A059MU59
contig_1	cds	769835	771370	+	ENBDON_00742	1036	0	1	0.959	1	UniRef:UniRef90_A0A8D4K306
contig_1	cds	771468	772904	+	ENBDON_00743	-	0	1	1	1	UniRef:UniRef100_UPI0009BECAA8
contig_1	cds	772885	773484	-	ENBDON_00744	363	1.2e-126	1	1	0.915	UniRef:UniRef90_A0A098BR47
contig_1	cds	773494	773922	-	ENBDON_00745	-	0	1	1	1	UniRef:UniRef100_UPI0011242B5A
contig_1	cds	773919	774800	-	ENBDON_00746	557	2.5e-200	0.98	0.98	0.937	UniRef:UniRef90_M2YQF8
contig_1	cds	774810	775985	-	ENBDON_00747	-	0	1	1	1	UniRef:UniRef100_UPI00265B5AB7
contig_1	cds	775985	777046	-	ENBDON_00748	650	3.4e-235	1	1	0.941	UniRef:UniRef90_A0A098BPQ6
contig_1	cds	777063	778040	-	ENBDON_00749	627	1.1e-226	1	1	0.938	UniRef:UniRef90_M2Y6I7
contig_1	cds	778131	779168	+	ENBDON_00750	-	0	1	1	1	UniRef:UniRef100_UPI0025A10015
contig_1	cds	779279	780118	-	ENBDON_00751	-	0	1	1	1	UniRef:UniRef100_UPI0025A29A15
contig_1	cds	780196	781851	+	ENBDON_00752	1072	0	1	1	0.971	UniRef:UniRef90_A0A098BPT7
contig_1	cds	781863	782975	+	ENBDON_00753	701	9.8e-255	1	1	0.968	UniRef:UniRef90_A0A5M3Y694
contig_1	cds	782986	784179	+	ENBDON_00754	784	2.7e-286	0.997	0.975	0.982	UniRef:UniRef90_M2Y6J3
contig_1	cds	784191	786758	-	ENBDON_00755	1541	0	1	1	0.949	UniRef:UniRef90_A0A098BR60
contig_1	cds	786755	787846	-	ENBDON_00756	623	9.8e-224	1	0.95	0.926	UniRef:UniRef90_A0A385HI14
contig_1	cds	787843	788445	-	ENBDON_00757	370	1.4e-128	1.01	0.845	0.921	UniRef:UniRef90_A0A098BPR6
contig_1	cds	788638	789189	+	ENBDON_00758	326	2.3e-112	1	1	0.989	UniRef:UniRef90_UPI0025A14CA3
contig_1	cds	789220	790842	-	ENBDON_00759	1023	0	1	0.963	0.954	UniRef:UniRef90_A0A098BR61
contig_1	cds	790902	792017	-	ENBDON_00760	688	2.2e-249	1	0.976	0.954	UniRef:UniRef90_A0A059MUW6
contig_1	cds	792042	793220	-	ENBDON_00761	760	3.7e-277	1	0.978	0.967	UniRef:UniRef90_A0A059MUI1
contig_1	cds	793400	793585	+	ENBDON_00762	-	0	1	1	1	UniRef:UniRef100_A0A0N0S152
contig_1	cds	793704	794648	+	ENBDON_00763	529	3.2e-188	1.057	1	0.907	UniRef:UniRef90_A0A059MU26
contig_1	cds	795114	795878	+	ENBDON_00764	-	0	1	1	1	UniRef:UniRef100_A0A0M9WQ25
contig_1	cds	795899	796747	+	ENBDON_00765	-	0	1	1	1	UniRef:UniRef100_A0A0M9WQ24
contig_1	cds	796752	797930	+	ENBDON_00766	-	0	1	1	1	UniRef:UniRef100_A0A0M8PR10
contig_1	cds	797988	799007	+	ENBDON_00767	629	5.6e-227	1	1	0.968	UniRef:UniRef90_A0A098BPV2
contig_1	cds	799004	800062	+	ENBDON_00768	465	6.4e-162	1	0.986	0.886	UniRef:UniRef90_A0A098BPS6
contig_1	cds	800059	801384	+	ENBDON_00769	777	2.5e-282	1.005	1	0.941	UniRef:UniRef90_A0A098BR72
contig_1	cds	801381	802616	+	ENBDON_00770	659	1.9e-236	1	1	0.908	UniRef:UniRef90_A0A059MUX9
contig_1	cds	802616	804028	+	ENBDON_00771	883	0	1	0.998	0.949	UniRef:UniRef90_A0A098BR71
contig_1	cds	804028	804558	+	ENBDON_00772	-	0	1	1	1	UniRef:UniRef100_A0A0M8PIN0
contig_1	cds	804555	805133	+	ENBDON_00773	296	3.7e-100	1.01	1	0.861	UniRef:UniRef90_A0A059MU37
contig_1	cds	805140	805664	-	ENBDON_00774	-	0	1	1	1	UniRef:UniRef100_UPI000A7FEBE3
contig_1	cds	805661	807151	-	ENBDON_00775	955	0	1	1	0.968	UniRef:UniRef90_A0A098BSM6
contig_1	cds	807200	807373	-	ENBDON_00776	-	0	1	1	1	UniRef:UniRef100_A0A098BR76
contig_1	cds	807519	809258	+	ENBDON_00777	993	0	1	1	0.953	UniRef:UniRef90_A0A098BPW2
contig_1	cds	809255	811021	+	ENBDON_00778	952	0	0.998	0.998	0.918	UniRef:UniRef90_A0A098BPT6
contig_1	cds	811131	811931	+	ENBDON_00779	526	9.5e-189	1	0.937	0.996	UniRef:UniRef90_A0A098BR83
contig_1	cds	812117	812713	-	ENBDON_00780	-	0	1	1	1	UniRef:UniRef100_A0A0M9WQ39
contig_1	cds	812786	813973	+	ENBDON_00781	804	2e-294	1	1	0.99	UniRef:UniRef90_A0A0M8PR04
contig_1	cds	813970	814737	+	ENBDON_00782	476	1.4e-169	1	1	0.976	UniRef:UniRef90_M2WPG1
contig_1	cds	814747	815409	+	ENBDON_00783	431	6.4e-153	1	1	0.955	UniRef:UniRef90_M2Y6N8
contig_1	cds	815406	816635	+	ENBDON_00784	799	4e-292	1	1	0.954	UniRef:UniRef90_M2YP95
contig_1	cds	816912	818477	+	ENBDON_00785	969	0	1	1	0.944	UniRef:UniRef90_N1M7R6
contig_1	cds	818509	819888	+	ENBDON_00786	763	1.2e-275	1	0.96	0.915	UniRef:UniRef90_A0A059MUY7
contig_1	cds	820024	822147	+	ENBDON_00787	1299	0	1	1	0.915	UniRef:UniRef90_N1M2M6
contig_1	cds	822137	824374	+	ENBDON_00788	1404	0	1	1	0.932	UniRef:UniRef90_N1M474
contig_1	cds	824371	825603	+	ENBDON_00789	742	1.5e-269	0.998	0.998	0.971	UniRef:UniRef90_A0A0M8PQ97
contig_1	cds	825600	827234	+	ENBDON_00790	1030	0	1	1	0.991	UniRef:UniRef90_N1M7Q9
contig_1	cds	827321	828844	+	ENBDON_00791	987	0	1	0.992	0.957	UniRef:UniRef90_A0A6P1I2A5
contig_1	cds	828852	829592	+	ENBDON_00792	455	3.8e-161	1	0.95	0.967	UniRef:UniRef90_N1M2M0
contig_1	cds	829712	831073	-	ENBDON_00793	777	8.4e-282	1	1	0.907	UniRef:UniRef90_A0A2S8JFN4
contig_1	cds	831160	833301	-	ENBDON_00794	1424	0	1	1	0.973	UniRef:UniRef90_M2YPA9
contig_1	cds	833306	834148	-	ENBDON_00795	500	5.1e-178	1	0.959	0.921	UniRef:UniRef90_A0A842H7E8
contig_1	cds	834245	835060	+	ENBDON_00796	508	1.5e-181	1	1	0.978	UniRef:UniRef90_A0A0M8PMN3
contig_1	cds	835106	836143	+	ENBDON_00797	683	2.9e-248	1	1	0.957	UniRef:UniRef90_A0A5M3YF81
contig_1	cds	836140	837627	+	ENBDON_00798	937	0	1	1	0.966	UniRef:UniRef90_N1M464
contig_1	cds	837705	838022	+	ENBDON_00799	-	0	1	1	1	UniRef:UniRef100_UPI0025A0BB13
contig_1	cds	838019	838474	+	ENBDON_00800	315	5.3e-109	1	1	0.934	UniRef:UniRef90_M2YQM8
contig_1	cds	838471	839664	+	ENBDON_00801	749	1.4e-272	1	1	0.947	UniRef:UniRef90_A0A059MVB2
contig_1	cds	839688	841133	+	ENBDON_00802	848	0	0.998	0.98	0.904	UniRef:UniRef90_Q0SJQ5
contig_1	cds	841175	843601	+	ENBDON_00803	1513	0	1	0.995	0.942	UniRef:UniRef90_M2Y6Q9
contig_1	cds	843678	844916	-	ENBDON_00804	779	6e-284	1	1	0.934	UniRef:UniRef90_A0A1H4S4M4
contig_1	cds	845344	845820	+	ENBDON_00805	317	1.1e-109	1	1	0.981	UniRef:UniRef90_A0A0M9WNN5
contig_1	cds	845822	847045	+	ENBDON_00806	822	3.4e-301	1	1	0.978	UniRef:UniRef90_Q0SJQ8
contig_1	cds	847098	847910	+	ENBDON_00807	497	4.1e-177	1	0.989	0.93	UniRef:UniRef90_A0A2S2C178
contig_1	cds	847986	848468	+	ENBDON_00808	340	9e-119	1	1	0.963	UniRef:UniRef90_A0A0M9WNN1
contig_1	cds	848465	849640	+	ENBDON_00809	697	3.4e-252	1	1	0.923	UniRef:UniRef90_UPI001A0B608F
contig_1	cds	849659	850141	+	ENBDON_00810	316	3.7e-109	1	1	0.963	UniRef:UniRef90_M2YQN5
contig_1	cds	850246	850446	+	ENBDON_00811	129	2.6e-38	1	1	0.939	UniRef:UniRef90_M2XNA1
contig_1	cds	850458	850994	+	ENBDON_00812	347	6.4e-121	1	1	0.972	UniRef:UniRef90_M2WPI3
contig_1	cds	850994	851647	+	ENBDON_00813	414	3.7e-146	1	1	0.972	UniRef:UniRef90_M2Y6R6
contig_1	cds	851742	853157	+	ENBDON_00814	835	5.8e-304	1	0.952	0.907	UniRef:UniRef90_A0A5M3YBT4
contig_1	cds	853204	854394	+	ENBDON_00815	787	1.1e-287	1	1	0.947	UniRef:UniRef90_Q0SJR8
contig_1	cds	854627	855976	+	ENBDON_00816	832	1e-303	1	1	0.984	UniRef:UniRef90_A0A0M8PMM2
contig_1	cds	856287	856439	+	ENBDON_00817	103	1.5e-28	1	1	0.96	UniRef:UniRef90_A0A842H4X8
contig_1	cds	856741	857622	+	ENBDON_00818	-	0	1	1	1	UniRef:UniRef100_M2Y6S1
contig_1	cds	857628	857885	+	ENBDON_00819	-	0	1	1	1	UniRef:UniRef100_A0A0M9WNM7
contig_1	cds	857899	859122	+	ENBDON_00820	781	7e-285	1	1	0.973	UniRef:UniRef90_A0A0V9URT5
contig_1	cds	859249	860454	+	ENBDON_00821	768	1.3e-279	1	0.957	0.948	UniRef:UniRef90_Q0SJS3
contig_1	cds	860507	861658	-	ENBDON_00822	-	0	1	1	1	UniRef:UniRef100_A0A0M9WNN0
contig_1	cds	861710	862879	-	ENBDON_00823	802	5e-294	1	1	0.995	UniRef:UniRef90_A0A059MVC9
contig_1	cds	863044	864030	+	ENBDON_00824	596	1.5e-214	1	1	0.939	UniRef:UniRef90_M2YPE8
contig_1	cds	864204	865028	+	ENBDON_00825	530	3.9e-190	1	1	0.978	UniRef:UniRef90_Q0SJS6
contig_1	cds	865048	866544	+	ENBDON_00826	830	2.7e-301	1.002	1	0.854	UniRef:UniRef90_N1M3S4
contig_1	cds	866624	867286	-	ENBDON_00827	-	0	1	1	1	UniRef:UniRef100_A0A0M8PPC1
contig_1	cds	867373	868236	-	ENBDON_00828	561	3.3e-202	1	1	0.993	UniRef:UniRef90_A0A0M8PML7
contig_1	cds	868260	869051	-	ENBDON_00829	477	1.7e-169	1	0.967	0.951	UniRef:UniRef90_N1M8E4
contig_1	cds	869139	870125	+	ENBDON_00830	-	0	1	1	1	UniRef:UniRef100_A0A0M9WNM8
contig_1	cds	870135	871553	+	ENBDON_00831	861	0	0.998	1	0.972	UniRef:UniRef90_A0A0M9WNQ4
contig_1	cds	871696	873213	+	ENBDON_00832	928	0	1	1	0.937	UniRef:UniRef90_A0A059MVR0
contig_1	cds	873242	874084	+	ENBDON_00833	532	7.4e-191	1	1	0.982	UniRef:UniRef90_A0A0M8PP98
contig_1	cds	874200	874856	+	ENBDON_00834	420	1.4e-148	1	1	0.995	UniRef:UniRef90_A0A0N0S0S0
contig_1	cds	875298	876071	-	ENBDON_00835	471	1.5e-167	1	1	0.973	UniRef:UniRef90_A0A059MUZ4
contig_1	cds	876093	876917	-	ENBDON_00836	539	8.4e-194	1	1	0.982	UniRef:UniRef90_M2YQQ5
contig_1	cds	877107	878507	+	ENBDON_00837	-	0	1	1	1	UniRef:UniRef100_M2XNB9
contig_1	cds	878504	879388	+	ENBDON_00838	-	0	1	1	1	UniRef:UniRef100_M2WPJ9
contig_1	cds	879385	880374	+	ENBDON_00839	-	0	1	1	1	UniRef:UniRef100_M2Y6U1
contig_1	cds	880481	881137	+	ENBDON_00840	-	0	1	1	1	UniRef:UniRef100_M2YPG0
contig_1	cds	881219	882409	-	ENBDON_00841	699	1.3e-252	1	0.975	0.944	UniRef:UniRef90_A0A098BJS5
contig_1	cds	882461	883123	-	ENBDON_00842	-	0	1	1	1	UniRef:UniRef100_A0A098BR89
contig_1	cds	883120	883887	-	ENBDON_00843	-	0	1	1	1	UniRef:UniRef100_A0A0M8PL31
contig_1	cds	884049	884870	+	ENBDON_00844	495	1.2e-176	0.952	1	0.973	UniRef:UniRef90_A0A098BR86
contig_1	cds	884949	885986	-	ENBDON_00845	688	2.1e-250	1	1	0.968	UniRef:UniRef90_A0A098BPX2
contig_1	cds	886132	886950	+	ENBDON_00846	525	3.2e-188	1	1	0.974	UniRef:UniRef90_A0A098BPU6
contig_1	cds	886950	888212	+	ENBDON_00847	795	4.6e-290	1	0.998	0.974	UniRef:UniRef90_A0A098BR94
contig_1	cds	888345	889184	+	ENBDON_00848	-	0	1	1	1	UniRef:UniRef100_UPI0022A83373
contig_1	cds	889171	890205	+	ENBDON_00849	-	0	1	1	1	UniRef:UniRef100_UPI0022A8AA7C
contig_1	cds	890238	891431	+	ENBDON_00850	768	3.4e-280	1	1	0.945	UniRef:UniRef90_A0A059MUC3
contig_1	cds	891428	892525	+	ENBDON_00851	634	2.2e-228	1	1	0.932	UniRef:UniRef90_A0A059MU69
contig_1	cds	892572	894230	+	ENBDON_00852	1071	0	1	1	0.969	UniRef:UniRef90_N1MA95
contig_1	cds	894247	895098	+	ENBDON_00853	-	0	1	1	1	UniRef:UniRef100_UPI000347D8EA
contig_1	cds	895095	895748	+	ENBDON_00854	-	0	1	1	1	UniRef:UniRef100_A0A0M9WMV0
contig_1	cds	895777	896409	+	ENBDON_00855	-	0	1	1	1	UniRef:UniRef100_UPI0002D2B190
contig_1	cds	896406	896672	+	ENBDON_00856	-	0	1	1	1	UniRef:UniRef100_A0A0M9WMU2
contig_1	cds	896669	897382	+	ENBDON_00857	-	0	1	1	1	UniRef:UniRef100_UPI00066151D2
contig_1	cds	897429	898445	-	ENBDON_00858	-	0	1	1	1	UniRef:UniRef100_A0A098BRA0
contig_1	cds	898645	899376	-	ENBDON_00859	447	1.1e-157	1	0.813	0.951	UniRef:UniRef90_UPI00265E921B
contig_1	cds	899923	901647	+	ENBDON_00860	1082	0	0.995	0.961	0.932	UniRef:UniRef90_N1MEP4
contig_1	cds	901791	903182	+	ENBDON_00861	905	0	0.998	0.967	0.981	UniRef:UniRef90_A0A385HI34
contig_1	cds	903179	903418	+	ENBDON_00862	-	0	1	1	1	UniRef:UniRef100_A0A059MU80
contig_1	cds	903446	904918	-	ENBDON_00863	882	0	1	1	0.98	UniRef:UniRef90_A0A059MUA9
contig_1	tRNA	905039	905113	+	ENBDON_00864	77.2	-	-	-	-	-
contig_1	cds	905200	905451	-	ENBDON_00865	-	0	1	1	1	UniRef:UniRef100_A0A0M9WMU7
contig_1	cds	905507	906028	-	ENBDON_00866	327	3.7e-113	1	1	0.954	UniRef:UniRef90_A0A098BPW6
contig_1	cds	906147	906353	+	ENBDON_00867	112	1.2e-31	0.882	1	0.983	UniRef:UniRef90_A0A0M8PH74
contig_1	cds	906464	907756	-	ENBDON_00868	610	8e-216	0.912	0.829	0.839	UniRef:UniRef90_A0A0M8PEG3
contig_1	cds	907844	909433	-	ENBDON_00869	948	0	0.998	0.989	0.919	UniRef:UniRef90_A0A059MU90
contig_1	cds	909476	909928	-	ENBDON_00870	293	2.4e-100	1	1	0.98	UniRef:UniRef90_A0A0M8PL11
contig_1	cds	910078	910860	+	ENBDON_00871	533	1.1e-191	1	1	0.985	UniRef:UniRef90_UPI0025A2E9C7
contig_1	cds	910866	911720	-	ENBDON_00872	-	0	1	1	1	UniRef:UniRef100_M2XT85
contig_1	cds	911779	911985	-	ENBDON_00873	-	0	1	1	1	UniRef:UniRef100_A0A0M8PLV8
contig_1	cds	912077	913261	-	ENBDON_00874	703	2.2e-254	1	0.975	0.919	UniRef:UniRef90_A0A098BRB4
contig_1	cds	913403	914110	+	ENBDON_00875	442	1.1e-156	1	0.959	0.957	UniRef:UniRef90_A0A098BQ01
contig_1	cds	914107	915516	+	ENBDON_00876	828	2.3e-301	1	1	0.945	UniRef:UniRef90_A0A098BPX4
contig_1	cds	915570	916673	+	ENBDON_00877	684	7.9e-248	0.997	0.997	0.926	UniRef:UniRef90_A0A385HIB9
contig_1	cds	916635	917060	-	ENBDON_00878	-	0	1	1	1	UniRef:UniRef100_M2YQD4
contig_1	cds	917114	917809	+	ENBDON_00879	410	6.2e-144	1	0.939	0.909	UniRef:UniRef90_N1MEV7
contig_1	cds	917851	919152	+	ENBDON_00880	810	9.9e-296	1	1	0.979	UniRef:UniRef90_A0A059MUD6
contig_1	cds	919242	920474	+	ENBDON_00881	781	8.9e-285	1	1	0.951	UniRef:UniRef90_A0A098BPY1
contig_1	cds	920550	921176	+	ENBDON_00882	371	2.2e-129	1	1	0.933	UniRef:UniRef90_A0A059MUU7
contig_1	cds	921201	922622	+	ENBDON_00883	-	0	1	1	1	UniRef:UniRef100_A0A0M8PI94
contig_1	cds	922689	923312	+	ENBDON_00884	382	7.8e-134	1	1	0.995	UniRef:UniRef90_A0A2D2A2A0
contig_1	cds	923309	923746	+	ENBDON_00885	-	0	1	1	1	UniRef:UniRef100_M2ZTT7
contig_1	cds	923764	924024	-	ENBDON_00886	103	1e-27	0.802	1.03	0.826	UniRef:UniRef90_A0A2D2A2C4
contig_1	cds	924169	925368	+	ENBDON_00887	768	1.2e-279	0.997	0.932	0.942	UniRef:UniRef90_A0A8D4G110
contig_1	cds	925430	926716	-	ENBDON_00888	781	5.1e-284	1	0.939	0.932	UniRef:UniRef90_A0A098BRD8
contig_1	cds	926963	927604	-	ENBDON_00889	377	1.2e-131	1	1	0.991	UniRef:UniRef90_N1M3B0
contig_1	cds	927789	928049	-	ENBDON_00890	-	0	1	1	1	UniRef:UniRef100_A0A8D4K0B7
contig_1	cds	928046	928768	-	ENBDON_00891	-	0	1	1	1	UniRef:UniRef100_A0A8D4FUE0
contig_1	cds	928918	929355	-	ENBDON_00892	-	0	1	1	1	UniRef:UniRef100_A0A8D4FT49
contig_1	cds	929432	931267	+	ENBDON_00893	1073	0	1	0.995	0.946	UniRef:UniRef90_M2ZTS4
contig_1	cds	931275	931928	-	ENBDON_00894	-	0	1	1	1	UniRef:UniRef100_UPI0025A19D8B
contig_1	cds	931959	933608	-	ENBDON_00895	991	0	1	1	0.909	UniRef:UniRef90_N1M414
contig_1	cds	933624	934394	-	ENBDON_00896	457	8.8e-162	1	1	0.938	UniRef:UniRef90_A0A098BRE9
contig_1	cds	934391	935557	-	ENBDON_00897	673	1.4e-242	1.041	1	0.903	UniRef:UniRef90_A0A385HID0
contig_1	cds	935733	943454	+	ENBDON_00898	4635	0	1.003	1	0.928	UniRef:UniRef90_N1LZE9
contig_1	cds	943815	944279	-	ENBDON_00899	285	2.6e-97	1	1	0.903	UniRef:UniRef90_A0A098BQ04
contig_1	cds	944441	945325	-	ENBDON_00900	573	1.8e-206	1	0.987	0.997	UniRef:UniRef90_A0A385HI84
contig_1	cds	945366	946154	-	ENBDON_00901	488	1.4e-173	0.992	0.945	0.931	UniRef:UniRef90_A0A9Q8W2F9
contig_1	cds	946312	946920	+	ENBDON_00902	370	4.5e-129	0.99	0.976	0.985	UniRef:UniRef90_M2ZUW4
contig_1	cds	947582	948124	-	ENBDON_00903	259	2.9e-86	0.989	0.989	0.742	UniRef:UniRef90_UPI0012EEBB2F
contig_1	cds	948595	949605	+	ENBDON_00904	-	0	1	1	1	UniRef:UniRef100_UPI0025A12CFA
contig_1	cds	949683	958958	+	ENBDON_00905	5481	0	1.014	1.001	0.912	UniRef:UniRef90_A0A098BRE7
contig_1	cds	958963	959202	+	ENBDON_00906	-	0	1	1	1	UniRef:UniRef100_A0A0N0S180
contig_1	cds	959210	960460	+	ENBDON_00907	712	2.6e-257	0.998	0.998	0.94	UniRef:UniRef90_A0A5M3YEG8
contig_1	cds	960566	961129	+	ENBDON_00908	-	0	1	1	1	UniRef:UniRef100_A0A2I6L1A1
contig_1	cds	961199	961408	+	ENBDON_00909	-	0	1	1	1	UniRef:UniRef100_A0A2I6L188
contig_1	cds	961405	962058	+	ENBDON_00910	-	0	1	1	1	UniRef:UniRef100_M2XT49
contig_1	cds	962171	962602	+	ENBDON_00911	-	0	1	1	1	UniRef:UniRef100_A0A385HI66
contig_1	cds	962599	962925	+	ENBDON_00912	-	0	1	1	1	UniRef:UniRef100_A0A0M9WQJ2
contig_1	cds	963076	964641	+	ENBDON_00913	1033	0	1	1	0.994	UniRef:UniRef90_A0A0M8PJH7
contig_1	cds	964826	965530	+	ENBDON_00914	-	0	1	1	1	UniRef:UniRef100_M2ZA08
contig_1	cds	965540	966370	-	ENBDON_00915	530	5e-190	1	0.989	0.953	UniRef:UniRef90_A0A098BRF5
contig_1	cds	966400	967836	-	ENBDON_00916	833	3.5e-303	0.994	0.992	0.945	UniRef:UniRef90_A0A098BQ43
contig_1	cds	967946	968839	+	ENBDON_00917	-	0	1	1	1	UniRef:UniRef100_M2ZUV0
contig_1	cds	968836	970977	+	ENBDON_00918	1434	0	0.999	0.992	0.968	UniRef:UniRef90_A0A2I6L134
contig_1	cds	971069	971758	-	ENBDON_00919	395	2.7e-138	1	1	0.917	UniRef:UniRef90_A0A098BSX7
contig_1	cds	971755	973338	-	ENBDON_00920	938	0	1.006	0.998	0.953	UniRef:UniRef90_A0A0M9WQN0
contig_1	cds	973503	974906	+	ENBDON_00921	808	1.2e-293	1.004	1.002	0.957	UniRef:UniRef90_A0A098BQ48
contig_1	cds	974999	976042	-	ENBDON_00922	643	3e-232	0.994	0.977	0.93	UniRef:UniRef90_A0A385HJ10
contig_1	cds	976101	977018	-	ENBDON_00923	-	0	1	1	1	UniRef:UniRef100_M2ZTP6
contig_1	cds	977029	978621	-	ENBDON_00924	1013	0	1	1	0.998	UniRef:UniRef90_A0A098BSY2
contig_1	cds	978755	979318	-	ENBDON_00925	-	0	1	1	1	UniRef:UniRef100_A0A098BRG6
contig_1	cds	979514	980830	-	ENBDON_00926	834	7.4e-305	1	1	0.97	UniRef:UniRef90_M2YQ91
contig_1	cds	981129	981875	+	ENBDON_00927	484	1.4e-172	1	0.965	0.964	UniRef:UniRef90_A0A098BRI6
contig_1	cds	981881	982585	-	ENBDON_00928	419	1.1e-147	1	0.992	0.923	UniRef:UniRef90_A0A2D2A2D4
contig_1	cds	982777	984930	+	ENBDON_00929	1420	0	1	1	0.992	UniRef:UniRef90_N1LY37
contig_1	cds	984901	986133	-	ENBDON_00930	775	2.1e-282	1	0.965	0.929	UniRef:UniRef90_A0A0M8PST3
contig_1	cds	986334	986927	-	ENBDON_00931	362	4.4e-126	0.995	0.995	0.934	UniRef:UniRef90_A0A098BRJ1
contig_1	cds	987033	989753	-	ENBDON_00932	1686	0	1	1	0.992	UniRef:UniRef90_M2ZUT6
contig_1	cds	990008	991213	+	ENBDON_00933	743	4.1e-270	1	0.995	0.928	UniRef:UniRef90_A0A059MJY6
contig_1	cds	991435	991974	-	ENBDON_00934	291	3.6e-98	0.939	0.8	0.935	UniRef:UniRef90_A0A0N0S183
contig_1	cds	992480	992704	+	ENBDON_00935	126	1.1e-36	1	0.987	1	UniRef:UniRef90_A0A842H5T0
contig_1	cds	992895	993872	+	ENBDON_00936	-	0	1	1	1	UniRef:UniRef100_M2YQ83
contig_1	cds	993996	994331	+	ENBDON_00937	-	0	1	1	1	UniRef:UniRef100_M2ZUT4
contig_1	cds	994350	994598	-	ENBDON_00938	-	0	1	1	1	UniRef:UniRef100_UPI0025A27088
contig_1	cds	995271	996299	+	ENBDON_00939	621	5.2e-224	0.994	1	0.938	UniRef:UniRef90_A0A098BQ44
contig_1	cds	996296	997405	+	ENBDON_00940	606	4.2e-217	1.003	0.997	0.911	UniRef:UniRef90_A0A385HIG8
contig_1	cds	997402	998184	+	ENBDON_00941	471	2.6e-167	0.988	0.959	0.949	UniRef:UniRef90_A0A0M8PJS3
contig_1	cds	998177	998941	+	ENBDON_00942	489	1.9e-174	0.996	0.917	0.976	UniRef:UniRef90_A0A098BRI0
contig_1	cds	998948	999352	-	ENBDON_00943	-	0	1	1	1	UniRef:UniRef100_A0A0M8PRV7
contig_1	cds	999349	999810	-	ENBDON_00944	-	0	1	1	1	UniRef:UniRef100_M2Z9Y1
contig_1	cds	999899	1000966	+	ENBDON_00945	670	9.6e-243	1	1	0.972	UniRef:UniRef90_A0A098BRK4
contig_1	cds	1001001	1002266	+	ENBDON_00946	806	2.7e-294	1.002	1	0.969	UniRef:UniRef90_A0A5M3YC48
contig_1	cds	1002336	1003085	-	ENBDON_00947	455	2.4e-161	1	0.984	0.932	UniRef:UniRef90_A0A098BRI3
contig_1	cds	1003094	1004557	-	ENBDON_00948	830	5.5e-301	1.01	0.928	0.921	UniRef:UniRef90_A0A5M3YFH9
contig_1	cds	1004994	1005584	+	ENBDON_00949	324	1.5e-110	1	0.824	0.913	UniRef:UniRef90_A0A8D4K4H6
contig_1	cds	1005626	1006240	+	ENBDON_00950	-	-	-	-	-	-
contig_1	cds	1006278	1006940	+	ENBDON_00951	430	3.2e-152	1.018	0.953	0.893	UniRef:UniRef90_N1M469
contig_1	cds	1006937	1008250	+	ENBDON_00952	852	0	1	1	0.975	UniRef:UniRef90_A0A098BRI8
contig_1	cds	1008247	1009857	+	ENBDON_00953	936	0	1.002	1	0.905	UniRef:UniRef90_A0A098BQ76
contig_1	cds	1009869	1010213	+	ENBDON_00954	227	2.4e-75	1	0.958	0.974	UniRef:UniRef90_A0A098BQ58
contig_1	cds	1010210	1010536	+	ENBDON_00955	200	4.6e-65	0.981	0.964	0.906	UniRef:UniRef90_N1M6N7
contig_1	cds	1010582	1011418	+	ENBDON_00956	477	4.6e-169	1	0.986	0.939	UniRef:UniRef90_M2ZXE2
contig_1	cds	1011488	1011982	+	ENBDON_00957	-	0	1	1	1	UniRef:UniRef100_A0A0M9WQJ6
contig_1	cds	1011988	1012641	+	ENBDON_00958	-	0	1	1	1	UniRef:UniRef100_A0A0M8PJJ5
contig_1	cds	1012671	1013375	+	ENBDON_00959	452	7.7e-161	1	1	0.974	UniRef:UniRef90_M2XVN1
contig_1	cds	1013424	1015067	+	ENBDON_00960	-	0	1	1	1	UniRef:UniRef100_A0A0M8PK08
contig_1	cds	1015122	1015766	-	ENBDON_00961	-	0	1	1	1	UniRef:UniRef100_A0A0M9WQJ0
contig_1	cds	1015870	1016412	-	ENBDON_00962	331	1.3e-114	1	1	0.933	UniRef:UniRef90_N1MCE3
contig_1	cds	1016569	1018047	+	ENBDON_00963	944	0	1	1	0.967	UniRef:UniRef90_A0A2D2A2G8
contig_1	cds	1018199	1018915	-	ENBDON_00964	440	1.1e-155	1	1	0.954	UniRef:UniRef90_A0A098BQ67
contig_1	cds	1018994	1021234	-	ENBDON_00965	1353	0	1	1	0.981	UniRef:UniRef90_A0A5M3YC27
contig_1	cds	1021262	1021570	-	ENBDON_00966	189	8.2e-61	1.029	1	0.914	UniRef:UniRef90_N1MCD9
contig_1	cds	1021765	1024146	+	ENBDON_00967	1380	0	1.003	1	0.921	UniRef:UniRef90_A0A098BQ90
contig_1	cds	1024261	1024506	+	ENBDON_00968	-	0	1	1	1	UniRef:UniRef100_A0A098BQ72
contig_1	cds	1024503	1025180	+	ENBDON_00969	432	4.7e-153	1	1	0.924	UniRef:UniRef90_A0A6I6Y8K8
contig_1	cds	1025147	1026268	-	ENBDON_00970	-	0	1	1	1	UniRef:UniRef100_UPI0025A08A90
contig_1	cds	1026265	1027077	-	ENBDON_00971	489	4.1e-174	1	1	0.937	UniRef:UniRef90_A0A098BRK7
contig_1	cds	1027074	1027313	-	ENBDON_00972	-	0	1	1	1	UniRef:UniRef100_M2ZW69
contig_1	cds	1027449	1028069	+	ENBDON_00973	365	1.2e-126	1	0.862	0.947	UniRef:UniRef90_A0A098BQ79
contig_1	cds	1028177	1030267	+	ENBDON_00974	1269	0	1	1	0.991	UniRef:UniRef90_A0A059MV42
contig_1	cds	1030586	1030951	+	ENBDON_00975	-	0	1	1	1	UniRef:UniRef100_UPI0025A18F6B
contig_1	cds	1031012	1031362	+	ENBDON_00976	-	0	1	1	1	UniRef:UniRef100_M2ZXC2
contig_1	cds	1031388	1032515	-	ENBDON_00977	736	3.9e-268	1	1	0.989	UniRef:UniRef90_A0A098BQ98
contig_1	cds	1032606	1033904	+	ENBDON_00978	837	2e-306	1	1	0.958	UniRef:UniRef90_A0A098BQ85
contig_1	cds	1033974	1034585	+	ENBDON_00979	379	9.5e-133	1	1	0.936	UniRef:UniRef90_A0A098BRP3
contig_1	cds	1034651	1036969	+	ENBDON_00980	1501	0	1	0.983	0.984	UniRef:UniRef90_M2YSS4
contig_1	cds	1036973	1038745	+	ENBDON_00981	1118	0	1.002	1	0.936	UniRef:UniRef90_M2ZXB6
contig_1	cds	1038742	1039425	+	ENBDON_00982	-	0	1	1	1	UniRef:UniRef100_UPI0025A08ED4
contig_1	cds	1039437	1039823	+	ENBDON_00983	243	2.3e-81	1.008	1	0.984	UniRef:UniRef90_A0A2D2A2J3
contig_1	cds	1039940	1041526	+	ENBDON_00984	1033	0	1	1	0.985	UniRef:UniRef90_A0A098BRP8
contig_1	cds	1041702	1042775	+	ENBDON_00985	-	0	1	1	1	UniRef:UniRef100_M2YSR9
contig_1	cds	1043020	1043229	-	ENBDON_00986	-	0	1	1	1	UniRef:UniRef100_A0A098BRM1
contig_1	cds	1043414	1044388	-	ENBDON_00987	-	0	1	1	1	UniRef:UniRef100_M2ZW52
contig_1	cds	1044385	1045014	-	ENBDON_00988	406	3.8e-143	0.995	0.929	0.957	UniRef:UniRef90_M2ZCF3
contig_1	cds	1045056	1046186	-	ENBDON_00989	761	2.6e-278	1	1	0.997	UniRef:UniRef90_M2XVJ8
contig_1	cds	1046242	1047087	+	ENBDON_00990	527	1.2e-188	1	0.993	0.961	UniRef:UniRef90_A0A0M8PJL2
contig_1	cds	1047290	1048786	+	ENBDON_00991	-	0	1	1	1	UniRef:UniRef100_A0A0M8PMD0
contig_1	cds	1048797	1049834	+	ENBDON_00992	-	0	1	1	1	UniRef:UniRef100_UPI0025A2CB79
contig_1	cds	1049831	1051618	+	ENBDON_00993	958	0	0.953	0.882	0.926	UniRef:UniRef90_A0A385HIV4
contig_1	cds	1051618	1053279	+	ENBDON_00994	938	0	1	1	0.935	UniRef:UniRef90_A0A098BRQ9
contig_1	ncRNA	1053301	1053502	+	ENBDON_00995	133.7	5.7e-21	-	-	-	RFAM:RF02471
contig_1	cds	1053596	1055308	+	ENBDON_00996	1093	0	1	1	0.986	UniRef:UniRef90_A0A098BRM8
contig_1	cds	1055296	1055967	-	ENBDON_00997	-	0	1	1	1	UniRef:UniRef100_A0A0M9WQK8
contig_1	cds	1055964	1056062	-	ENBDON_00998	-	0	1	1	1	UniRef:UniRef100_A0A0M9WQQ1
contig_1	cds	1056197	1057432	+	ENBDON_00999	792	2.6e-289	1	1	0.959	UniRef:UniRef90_A0A098BQA4
contig_1	cds	1057487	1057792	-	ENBDON_01000	-	0	1	1	1	UniRef:UniRef100_M2XVI7
contig_1	cds	1057795	1058631	-	ENBDON_01001	570	7.3e-206	1	1	0.989	UniRef:UniRef90_A0A098BQC1
contig_1	cds	1058693	1059160	-	ENBDON_01002	249	1e-82	0.968	0.932	0.947	UniRef:UniRef90_M2ZX96
contig_1	cds	1059379	1059858	-	ENBDON_01003	-	0	1	1	1	UniRef:UniRef100_UPI0006612685
contig_1	cds	1059855	1060661	-	ENBDON_01004	499	5.4e-178	1	1	0.989	UniRef:UniRef90_A0A385HIW4
contig_1	cds	1060762	1061490	+	ENBDON_01005	-	0	1	1	1	UniRef:UniRef100_A0A0M9WQL1
contig_1	cds	1061501	1062397	+	ENBDON_01006	572	8.5e-206	1	1	0.966	UniRef:UniRef90_A0A098BQC6
contig_1	cds	1062626	1063744	+	ENBDON_01007	-	0	1	1	1	UniRef:UniRef100_A0A0M8PRY6
contig_1	cds	1063803	1064858	+	ENBDON_01008	-	0	1	1	1	UniRef:UniRef100_A0A0M9WQL7
contig_1	cds	1064863	1065771	+	ENBDON_01009	-	0	1	1	1	UniRef:UniRef100_A0A0M9WQK9
contig_1	cds	1065824	1066600	+	ENBDON_01010	-	0	1	1	1	UniRef:UniRef100_A0A098BRP2
contig_1	cds	1066677	1067384	-	ENBDON_01011	-	0	1	1	1	UniRef:UniRef100_M2YSP8
contig_1	cds	1067459	1069456	-	ENBDON_01012	1035	0	1.003	1.002	0.861	UniRef:UniRef90_A0A098BQB7
contig_1	cds	1069614	1070756	-	ENBDON_01013	754	4.9e-275	1	0.941	0.987	UniRef:UniRef90_A0A4P8PM88
contig_1	cds	1070877	1071833	-	ENBDON_01014	-	0	1	1	1	UniRef:UniRef100_UPI0025A0C5B4
contig_1	ncRNA	1071448	1071515	+	ENBDON_01015	78	8.7e-12	-	-	-	RFAM:RF01781
contig_1	cds	1072051	1072632	-	ENBDON_01016	203	1.5e-63	0.855	0.825	0.642	UniRef:UniRef90_A0A7X9R2E3
contig_1	cds	1072691	1073134	-	ENBDON_01017	262	2.2e-88	1	1	0.966	UniRef:UniRef90_A0A098BQD7
contig_1	cds	1073296	1073874	+	ENBDON_01018	347	6.1e-120	1	0.814	0.943	UniRef:UniRef90_M2ZX80
contig_1	tRNA	1073955	1074027	-	ENBDON_01019	70.5	-	-	-	-	-
contig_1	cds	1074258	1074911	+	ENBDON_01020	383	5.8e-134	1	1	0.912	UniRef:UniRef90_A0A098BT81
contig_1	tRNA	1075010	1075082	+	ENBDON_01021	69.4	-	-	-	-	-
contig_1	tRNA	1075140	1075213	+	ENBDON_01022	81.8	-	-	-	-	-
contig_1	tRNA	1075251	1075327	+	ENBDON_01023	87.7	-	-	-	-	-
contig_1	tRNA	1075400	1075473	+	ENBDON_01024	81.8	-	-	-	-	-
contig_1	cds	1075756	1076994	+	ENBDON_01025	-	0	1	1	1	UniRef:UniRef100_A0A0M8PRZ2
contig_1	cds	1076994	1077725	+	ENBDON_01026	-	0	1	1	1	UniRef:UniRef100_A0A0N0S1E1
contig_1	cds	1077763	1078812	+	ENBDON_01027	728	1.5e-265	1	0.954	0.966	UniRef:UniRef90_M2YSP0
contig_1	cds	1078817	1079476	-	ENBDON_01028	-	0	1	1	1	UniRef:UniRef100_UPI0025A0440F
contig_1	cds	1079590	1080360	-	ENBDON_01029	445	3.3e-157	1	1	0.926	UniRef:UniRef90_A0A098BQD2
contig_1	cds	1080393	1080758	-	ENBDON_01030	-	0	1	1	1	UniRef:UniRef100_A0A0M9WQM9
contig_1	cds	1080755	1081621	-	ENBDON_01031	545	1.3e-195	1	1	0.997	UniRef:UniRef90_A0A0M8PR96
contig_1	cds	1081618	1082379	-	ENBDON_01032	475	3.4e-169	1	1	0.972	UniRef:UniRef90_A0A0M9WQL6
contig_1	cds	1082393	1083865	-	ENBDON_01033	932	0	1	0.944	0.957	UniRef:UniRef90_N1M2N8
contig_1	cds	1084091	1084684	-	ENBDON_01034	363	1.5e-126	1	1	0.975	UniRef:UniRef90_A0A098BRV3
contig_1	cds	1084771	1085994	+	ENBDON_01035	768	1.1e-279	0.998	0.998	0.924	UniRef:UniRef90_A0A098BT96
contig_1	cds	1086037	1086621	+	ENBDON_01036	358	5.8e-125	1	1	0.99	UniRef:UniRef90_A0A098BRR5
contig_1	cds	1086625	1087836	+	ENBDON_01037	-	0	1	1	1	UniRef:UniRef100_UPI0025A30DD9
contig_1	cds	1087829	1088629	+	ENBDON_01038	493	1.3e-175	0.996	0.996	0.94	UniRef:UniRef90_A0A098BQE2
contig_1	cds	1088626	1089978	+	ENBDON_01039	863	0	0.998	0.993	0.947	UniRef:UniRef90_A0A098BRV8
contig_1	cds	1089990	1090238	+	ENBDON_01040	162	5.9e-51	1	1	0.963	UniRef:UniRef90_M2ZC99
contig_1	cds	1090202	1090753	+	ENBDON_01041	373	5.7e-131	1	1	0.934	UniRef:UniRef90_A0A098BRR9
contig_1	cds	1090750	1092006	+	ENBDON_01042	806	1.5e-294	1	0.998	0.945	UniRef:UniRef90_UPI0019329135
contig_1	cds	1092141	1093607	-	ENBDON_01043	917	0	0.996	0.966	0.94	UniRef:UniRef90_M2ZX59
contig_1	cds	1093636	1094487	-	ENBDON_01044	572	3.8e-206	1	0.966	0.975	UniRef:UniRef90_A0A0M8PJN6
contig_1	cds	1094649	1095296	+	ENBDON_01045	-	0	1	1	1	UniRef:UniRef100_M2ZC94
contig_1	cds	1095346	1096170	-	ENBDON_01046	472	2.8e-167	1	1	0.927	UniRef:UniRef90_A0A098BRS4
contig_1	cds	1096383	1096520	-	ENBDON_01047	82	5.3e-20	1	1	0.889	UniRef:UniRef90_A0A8D4FVA0
contig_1	cds	1096517	1098040	-	ENBDON_01048	957	0	1	0.973	0.968	UniRef:UniRef90_A0A098BQG8
contig_1	cds	1098157	1099296	-	ENBDON_01049	597	4.4e-213	1.037	1	0.855	UniRef:UniRef90_A0A098BQF1
contig_1	cds	1099293	1100720	-	ENBDON_01050	921	0	0.998	0.994	0.973	UniRef:UniRef90_A0A2D2A2P7
contig_1	cds	1100717	1103068	-	ENBDON_01051	-	0	1	1	1	UniRef:UniRef100_UPI00177CF364
contig_1	cds	1103255	1104736	+	ENBDON_01052	949	0	1	0.963	0.998	UniRef:UniRef90_N1ME03
contig_1	cds	1104789	1105514	+	ENBDON_01053	-	0	1	1	1	UniRef:UniRef100_UPI00177E8431
contig_1	cds	1105553	1106446	-	ENBDON_01054	-	0	1	1	1	UniRef:UniRef100_UPI0025A2C3EC
contig_1	cds	1106498	1107505	-	ENBDON_01055	-	0	1	1	1	UniRef:UniRef100_A0A0M8PJT0
contig_1	cds	1107590	1109116	-	ENBDON_01056	916	0	1	1	0.937	UniRef:UniRef90_A0A098BTB6
contig_1	cds	1109343	1109876	+	ENBDON_01057	-	0	1	1	1	UniRef:UniRef100_UPI001CD827C0
contig_1	cds	1109866	1110873	+	ENBDON_01058	-	0	1	1	1	UniRef:UniRef100_UPI00177CBBA8
contig_1	cds	1110893	1111399	-	ENBDON_01059	-	0	1	1	1	UniRef:UniRef100_A0A098BQG3
contig_1	cds	1111429	1112349	-	ENBDON_01060	577	1.6e-207	1	1	0.954	UniRef:UniRef90_A0A098BRX8
contig_1	cds	1112450	1113310	+	ENBDON_01061	497	1.2e-176	0.997	0.997	0.916	UniRef:UniRef90_A0A098BTC2
contig_1	cds	1113314	1114486	-	ENBDON_01062	-	0	1	1	1	UniRef:UniRef100_A0A0M8PMJ8
contig_1	cds	1114489	1115388	-	ENBDON_01063	546	1e-195	1	1	0.946	UniRef:UniRef90_UPI0007CD5A15
contig_1	cds	1115530	1116519	+	ENBDON_01064	-	0	1	1	1	UniRef:UniRef100_UPI00034997F2
contig_1	cds	1116512	1117390	+	ENBDON_01065	527	1.8e-188	1	1	0.925	UniRef:UniRef90_A0A098BTC8
contig_1	cds	1117469	1118338	+	ENBDON_01066	545	2.2e-195	1	0.99	0.969	UniRef:UniRef90_A0A098BRU2
contig_1	cds	1118349	1119419	-	ENBDON_01067	-	0	1	1	1	UniRef:UniRef100_UPI0025A10509
contig_1	cds	1119516	1120157	-	ENBDON_01068	390	1e-136	0.995	0.959	0.943	UniRef:UniRef90_A0A2I6L0I1
contig_1	cds	1120174	1121553	-	ENBDON_01069	838	5.6e-306	1	1	0.998	UniRef:UniRef90_A0A098BRZ2
contig_1	cds	1121656	1122066	-	ENBDON_01070	222	7.4e-73	1.007	0.993	0.956	UniRef:UniRef90_A0A385HJ15
contig_1	cds	1122432	1123808	+	ENBDON_01071	868	0	1	0.993	0.959	UniRef:UniRef90_A0A098BRU6
contig_1	cds	1123768	1126092	-	ENBDON_01072	1469	0	1	1	0.979	UniRef:UniRef90_A0A385HIT7
contig_1	cds	1126126	1126548	-	ENBDON_01073	-	0	1	1	1	UniRef:UniRef100_M2YSJ4
contig_1	cds	1126575	1127033	-	ENBDON_01074	282	5.3e-96	0.987	0.987	0.96	UniRef:UniRef90_A0A098BRZ7
contig_1	cds	1127183	1129609	+	ENBDON_01075	1487	0	0.999	0.984	0.97	UniRef:UniRef90_M2ZVX9
contig_1	cds	1129676	1131073	-	ENBDON_01076	-	0	1	1	1	UniRef:UniRef100_A0A0M8PT02
contig_1	cds	1131070	1132956	-	ENBDON_01077	1307	0	1	1	0.99	UniRef:UniRef90_A0A059MV06
contig_1	cds	1133451	1134533	+	ENBDON_01078	652	1.5e-235	1.003	1	0.909	UniRef:UniRef90_A0A059MV37
contig_1	cds	1134684	1135565	+	ENBDON_01079	560	1.5e-201	1	1	0.956	UniRef:UniRef90_A0A098BS02
contig_1	cds	1135623	1136510	-	ENBDON_01080	577	3.5e-208	0.997	0.997	0.959	UniRef:UniRef90_A0A098BTE4
contig_1	cds	1136680	1137723	+	ENBDON_01081	635	1.9e-229	1	1	0.922	UniRef:UniRef90_A0A098BRW0
contig_1	cds	1137754	1138179	+	ENBDON_01082	-	0	1	1	1	UniRef:UniRef100_A0A0M8PJQ6
contig_1	cds	1138189	1139184	-	ENBDON_01083	610	4.6e-220	1.003	1	0.961	UniRef:UniRef90_A0A098BQI5
contig_1	cds	1139187	1140380	-	ENBDON_01084	-	0	1	1	1	UniRef:UniRef100_UPI0025A26804
contig_1	cds	1140500	1141111	+	ENBDON_01085	-	0	1	1	1	UniRef:UniRef100_UPI0025A2F158
contig_1	cds	1141093	1141506	-	ENBDON_01086	274	2.7e-93	1	1	0.949	UniRef:UniRef90_A0A059MV83
contig_1	cds	1141517	1142428	-	ENBDON_01087	530	6.4e-189	0.997	0.977	0.907	UniRef:UniRef90_A0A098BQK7
contig_1	cds	1142776	1143864	+	ENBDON_01088	685	1.3e-248	1	1	0.961	UniRef:UniRef90_A0A5M3YCK1
contig_1	cds	1143861	1144679	+	ENBDON_01089	515	2.2e-184	1.007	1	0.956	UniRef:UniRef90_A0A098BS11
contig_1	cds	1144672	1145544	+	ENBDON_01090	499	2.9e-177	0.997	0.997	0.941	UniRef:UniRef90_A0A098BTF5
contig_1	cds	1145578	1146927	+	ENBDON_01091	848	0	1.002	1	0.956	UniRef:UniRef90_A0A098BRW7
contig_1	cds	1147062	1148048	+	ENBDON_01092	653	6e-237	0.997	0.997	0.951	UniRef:UniRef90_A0A098BQL1
contig_1	cds	1148062	1148625	-	ENBDON_01093	368	5.2e-129	1	1	0.968	UniRef:UniRef90_A0A098BQJ5
contig_1	cds	1148628	1149296	-	ENBDON_01094	388	1.3e-135	1	1	0.932	UniRef:UniRef90_M2ZX06
contig_1	cds	1149402	1149686	-	ENBDON_01095	-	0	1	1	1	UniRef:UniRef100_M2ZVW1
contig_1	cds	1150045	1150455	+	ENBDON_01096	134	9.4e-38	0.919	0.856	0.888	UniRef:UniRef90_UPI000B137E15
contig_1	cds	1150553	1151959	+	ENBDON_01097	-	0	1	1	1	UniRef:UniRef100_M2ZC33
contig_1	cds	1152028	1153701	+	ENBDON_01098	992	0	1	1	0.95	UniRef:UniRef90_A0A098BQK1
contig_1	cds	1153683	1154351	+	ENBDON_01099	-	0	1	1	1	UniRef:UniRef100_A0A0M8PS27
contig_1	cds	1154357	1156015	-	ENBDON_01100	-	0	1	1	1	UniRef:UniRef100_M2ZX01
contig_1	cds	1156092	1158374	-	ENBDON_01101	1320	0	1	0.996	0.966	UniRef:UniRef90_A0A098BRX6
contig_1	cds	1158435	1158623	+	ENBDON_01102	-	0	1	1	1	UniRef:UniRef100_A0A098BQM2
contig_1	cds	1158688	1159272	-	ENBDON_01103	-	0	1	1	1	UniRef:UniRef100_M2XV89
contig_1	ncRNA-region	1159282	1159507	-	-	53.6	5.4e-09	-	-	-	RFAM:RF00379
contig_1	cds	1159719	1160111	-	ENBDON_01104	-	0	1	1	1	UniRef:UniRef100_M2YSG4
contig_1	cds	1160108	1160425	-	ENBDON_01105	-	-	-	-	-	-
contig_1	cds	1160509	1160928	+	ENBDON_01106	-	0	1	1	1	UniRef:UniRef100_A0A0M8PK74
contig_1	cds	1161037	1161504	-	ENBDON_01107	288	1.7e-98	1	1	0.948	UniRef:UniRef90_M2ZVV2
contig_1	cds	1161501	1163183	-	ENBDON_01108	-	0	1	1	1	UniRef:UniRef100_A0A0M8PT20
contig_1	cds	1163245	1164051	-	ENBDON_01109	504	5.7e-180	1.03	0.993	0.942	UniRef:UniRef90_A0A098BS32
contig_1	cds	1164101	1165072	+	ENBDON_01110	569	1.1e-203	1.037	1	0.943	UniRef:UniRef90_M2YSF9
contig_1	cds	1165075	1167834	+	ENBDON_01111	1773	0	1	1	0.992	UniRef:UniRef90_A0A098BRY6
contig_1	cds	1167831	1168382	+	ENBDON_01112	-	0	1	1	1	UniRef:UniRef100_M2ZVU7
contig_1	cds	1168405	1168653	-	ENBDON_01113	-	0	1	1	1	UniRef:UniRef100_M2ZC16
contig_1	cds	1168728	1170212	+	ENBDON_01114	-	0	1	1	1	UniRef:UniRef100_M2XV81
contig_1	cds	1170214	1170687	+	ENBDON_01115	287	5.6e-98	1	1	0.975	UniRef:UniRef90_A0A098BRZ0
contig_1	cds	1170769	1171575	+	ENBDON_01116	-	0	1	1	1	UniRef:UniRef100_M2ZWY4
contig_1	cds	1171572	1171853	+	ENBDON_01117	-	0	1	1	1	UniRef:UniRef100_M2ZVU2
contig_1	cds	1171894	1172643	-	ENBDON_01118	-	0	1	1	1	UniRef:UniRef100_UPI00259FFBAF
contig_1	cds	1172659	1173546	-	ENBDON_01119	-	0	1	1	1	UniRef:UniRef100_UPI00034BE44D
contig_1	cds	1173791	1174912	-	ENBDON_01120	-	0	1	1	1	UniRef:UniRef100_M2YSF0
contig_1	cds	1175028	1176155	-	ENBDON_01121	-	0	1	1	1	UniRef:UniRef100_M2ZWX9
contig_1	cds	1176308	1177054	+	ENBDON_01122	480	4.2e-171	0.996	0.972	0.927	UniRef:UniRef90_A0A098BQV2
contig_1	cds	1177051	1178319	+	ENBDON_01123	757	4.5e-275	1	1	0.953	UniRef:UniRef90_A0A098BSC8
contig_1	cds	1178407	1178694	+	ENBDON_01124	-	0	1	1	1	UniRef:UniRef100_UPI0025A017D8
contig_1	cds	1178794	1179834	-	ENBDON_01125	644	1.2e-232	1	0.991	0.948	UniRef:UniRef90_A0A098BS72
contig_1	cds	1179842	1180780	+	ENBDON_01126	-	0	1	1	1	UniRef:UniRef100_UPI0025A28678
contig_1	cds	1181042	1182340	+	ENBDON_01127	-	0	1	1	1	UniRef:UniRef100_UPI0025A032B6
contig_1	cds	1182367	1183092	+	ENBDON_01128	482	3.4e-172	1	1	0.983	UniRef:UniRef90_A0A098BSD3
contig_1	cds	1183167	1183445	-	ENBDON_01129	164	4.6e-51	1.033	1	0.863	UniRef:UniRef90_A0A059MV88
contig_1	cds	1183534	1184856	-	ENBDON_01130	739	2.8e-267	0.995	0.991	0.945	UniRef:UniRef90_A0A098BQY0
contig_1	cds	1184853	1185548	-	ENBDON_01131	415	5.3e-146	1	1	0.922	UniRef:UniRef90_A0A098BQW4
contig_1	cds	1185545	1186174	-	ENBDON_01132	382	1.2e-133	1.01	0.934	0.943	UniRef:UniRef90_A0A385HJ64
contig_1	cds	1186279	1188078	+	ENBDON_01133	1147	0	0.998	0.998	0.958	UniRef:UniRef90_A0A098BTS6
contig_1	cds	1188075	1188644	-	ENBDON_01134	-	0	1	1	1	UniRef:UniRef100_A0A0M8PPN7
contig_1	cds	1188727	1189341	+	ENBDON_01135	-	0	1	1	1	UniRef:UniRef100_A0A0M9WNW6
contig_1	cds	1189310	1189798	-	ENBDON_01136	-	0	1	1	1	UniRef:UniRef100_A0A0M8PGR6
contig_1	cds	1189879	1190931	+	ENBDON_01137	684	2.1e-248	1	1	0.989	UniRef:UniRef90_A0A385HJC3
contig_1	cds	1190906	1191658	-	ENBDON_01138	461	1.2e-163	0.996	0.996	0.952	UniRef:UniRef90_A0A098BTT1
contig_1	cds	1191775	1193337	+	ENBDON_01139	947	0	1	0.939	0.987	UniRef:UniRef90_A0A098BS84
contig_1	cds	1193334	1193573	+	ENBDON_01140	-	0	1	1	1	UniRef:UniRef100_UPI0025A118C7
contig_1	cds	1193620	1194642	+	ENBDON_01141	589	1.7e-211	0.979	0.997	0.91	UniRef:UniRef90_A0A385HJ11
contig_1	cds	1194734	1196626	-	ENBDON_01142	1251	0	1	1	0.99	UniRef:UniRef90_A0A8D4FTI7
contig_1	cds	1196747	1198249	-	ENBDON_01143	932	0	1	1	0.974	UniRef:UniRef90_A0A098BS90
contig_1	cds	1198259	1199455	-	ENBDON_01144	711	9.4e-258	1	1	0.995	UniRef:UniRef90_A0A098BQZ6
contig_1	cds	1199452	1200342	-	ENBDON_01145	-	0	1	1	1	UniRef:UniRef100_M2XV58
contig_1	cds	1200376	1200912	-	ENBDON_01146	-	0	1	1	1	UniRef:UniRef100_M2YSC3
contig_1	cds	1200918	1201208	-	ENBDON_01147	-	0	1	1	1	UniRef:UniRef100_A0A0M8PGR0
contig_1	cds	1201312	1201686	-	ENBDON_01148	-	0	1	1	1	UniRef:UniRef100_A0A0M8PJ56
contig_1	cds	1201683	1203323	-	ENBDON_01149	1008	0	0.998	1	0.961	UniRef:UniRef90_A0A098BR02
contig_1	cds	1203407	1204231	+	ENBDON_01150	540	2e-193	1	0.893	0.967	UniRef:UniRef90_A0A098BQY4
contig_1	cds	1204436	1204942	+	ENBDON_01151	-	0	1	1	1	UniRef:UniRef100_A0A0M8PN01
contig_1	cds	1205018	1206082	-	ENBDON_01152	626	2.1e-225	1	1	0.955	UniRef:UniRef90_A0A098BTU5
contig_1	cds	1206079	1207179	-	ENBDON_01153	726	5.1e-264	1	0.908	0.97	UniRef:UniRef90_A0A385HJN1
contig_1	cds	1207330	1208217	+	ENBDON_01154	517	2.9e-184	1	1	0.939	UniRef:UniRef90_M2ZBY1
contig_1	cds	1208233	1208433	+	ENBDON_01155	-	0	1	1	1	UniRef:UniRef100_A0A098BQY7
contig_1	cds	1208503	1209234	+	ENBDON_01156	-	0	1	1	1	UniRef:UniRef100_A0A0M9WNW2
contig_1	cds	1209295	1210410	+	ENBDON_01157	733	2.4e-267	1	1	0.962	UniRef:UniRef90_A0A098BTU9
contig_1	cds	1210554	1211285	+	ENBDON_01158	378	6.7e-131	0.996	0.938	0.996	UniRef:UniRef90_A0A098BSA5
contig_1	cds	1211292	1211636	-	ENBDON_01159	-	0	1	1	1	UniRef:UniRef100_A0A0M8PGC3
contig_1	cds	1211688	1212611	-	ENBDON_01160	530	4.9e-189	1	1	0.928	UniRef:UniRef90_A0A098BQZ2
contig_1	cds	1212711	1213076	+	ENBDON_01161	231	5.9e-77	0.992	0.952	0.933	UniRef:UniRef90_M2YSA9
contig_1	cds	1213141	1215618	+	ENBDON_01162	1535	0	1	1	0.979	UniRef:UniRef90_A0A098BTV2
contig_1	cds	1215715	1215999	+	ENBDON_01163	-	0	1	1	1	UniRef:UniRef100_A0A0M9WNU4
contig_1	cds	1216125	1216352	+	ENBDON_01164	-	0	1	1	1	UniRef:UniRef100_A0A0M8PNT5
contig_1	cds	1216577	1217239	-	ENBDON_01165	408	9e-144	0.995	0.995	0.954	UniRef:UniRef90_A0A059MVH5
contig_1	cds	1217350	1218102	-	ENBDON_01166	441	2.9e-155	1	0.862	0.944	UniRef:UniRef90_A0A5M3YBA2
contig_1	cds	1218105	1218767	-	ENBDON_01167	410	1.1e-144	1	1	0.973	UniRef:UniRef90_A0A059MVD4
contig_1	cds	1218799	1219947	-	ENBDON_01168	-	0	1	1	1	UniRef:UniRef100_M2ZBV1
contig_1	cds	1219961	1221151	-	ENBDON_01169	-	0	1	1	1	UniRef:UniRef100_A0A0M8PGB7
contig_1	cds	1221148	1222818	-	ENBDON_01170	1080	0	1	1	0.962	UniRef:UniRef90_A0A5M3YBB9
contig_1	cds	1222847	1223578	-	ENBDON_01171	-	0	1	1	1	UniRef:UniRef100_M2ZWT0
contig_1	cds	1223617	1224411	-	ENBDON_01172	523	9.9e-188	1	1	0.996	UniRef:UniRef90_A0A059MVD9
contig_1	cds	1224500	1225228	-	ENBDON_01173	-	-	-	-	-	-
contig_1	cds	1225253	1226617	-	ENBDON_01174	832	1.5e-303	1	1	0.969	UniRef:UniRef90_A0A059MVI4
contig_1	cds	1226976	1228127	-	ENBDON_01175	753	1.4e-274	1	0.98	0.979	UniRef:UniRef90_C1B2K7
contig_1	cds	1228376	1230013	+	ENBDON_01176	974	0	1	0.958	0.972	UniRef:UniRef90_A0A098BTV5
contig_1	cds	1230040	1230549	-	ENBDON_01177	-	0	1	1	1	UniRef:UniRef100_UPI0025A02CBF
contig_1	cds	1230729	1231940	+	ENBDON_01178	-	0	1	1	1	UniRef:UniRef100_A0A0M8PGP2
contig_1	cds	1232029	1232814	+	ENBDON_01179	-	0	1	1	1	UniRef:UniRef100_UPI0025A23387
contig_1	cds	1232811	1233242	+	ENBDON_01180	204	7.9e-66	1	1.092	0.853	UniRef:UniRef90_A0A0M8PJJ0
contig_1	cds	1233250	1235061	+	ENBDON_01181	-	0	1	1	1	UniRef:UniRef100_M2ZBT6
contig_1	cds	1235222	1235584	+	ENBDON_01182	-	0	1	1	1	UniRef:UniRef100_M2XV12
contig_1	cds	1235581	1237239	+	ENBDON_01183	986	0	1	1	0.984	UniRef:UniRef90_C1ATU2
contig_1	cds	1237311	1237742	+	ENBDON_01184	287	2e-98	0.993	0.993	0.993	UniRef:UniRef90_A0A098BR05
contig_1	cds	1237844	1240105	+	ENBDON_01185	1509	0	1	0.967	0.96	UniRef:UniRef90_A0A098BSG8
contig_1	cds	1240137	1240841	-	ENBDON_01186	-	0	1	1	1	UniRef:UniRef100_A0A098BTW2
contig_1	cds	1240955	1242172	+	ENBDON_01187	793	1.1e-289	1	1	0.988	UniRef:UniRef90_M2XV10
contig_1	cds	1242475	1243242	+	ENBDON_01188	-	0	1	1	1	UniRef:UniRef100_A0A098BR21
contig_1	cds	1243312	1243641	+	ENBDON_01189	-	0	1	1	1	UniRef:UniRef100_A0A0M9WLJ3
contig_1	cds	1243654	1244112	-	ENBDON_01190	-	0	1	1	1	UniRef:UniRef100_M2ZVM4
contig_1	cds	1244262	1245026	-	ENBDON_01191	-	0	1	1	1	UniRef:UniRef100_M2ZBS6
contig_1	cds	1245023	1246318	-	ENBDON_01192	801	5.4e-292	1	1	0.954	UniRef:UniRef90_A0A098BSC9
contig_1	cds	1246520	1246834	+	ENBDON_01193	-	0	1	1	1	UniRef:UniRef100_M2YS74
contig_1	cds	1246831	1246962	+	ENBDON_01194	-	-	-	-	-	-
contig_1	cds	1247078	1247362	+	ENBDON_01195	-	0	1	1	1	UniRef:UniRef100_A0A5M3YD47
contig_1	cds	1247388	1247786	+	ENBDON_01196	-	0	1	1	1	UniRef:UniRef100_M2ZBS1
contig_1	cds	1247833	1248558	-	ENBDON_01197	422	3.1e-148	0.988	0.944	0.908	UniRef:UniRef90_A0A385HJ61
contig_1	cds	1248657	1249391	+	ENBDON_01198	-	0	1	1	1	UniRef:UniRef100_A0A0M9WNQ7
contig_1	cds	1249483	1249782	+	ENBDON_01199	196	1.5e-63	1	1	0.99	UniRef:UniRef90_M2ZWQ2
contig_1	cds	1249779	1250306	+	ENBDON_01200	351	1.5e-122	1	1	0.989	UniRef:UniRef90_A0A0M8PMP1
contig_1	tRNA	1250345	1250417	-	ENBDON_01201	72.2	-	-	-	-	-
contig_1	cds	1250779	1251552	+	ENBDON_01202	473	4.1e-168	1	0.992	0.942	UniRef:UniRef90_A0A8D4FV16
contig_1	cds	1251869	1252693	+	ENBDON_01203	-	0	1	1	1	UniRef:UniRef100_M2XUZ6
contig_1	cds	1252770	1254293	+	ENBDON_01204	1009	0	1	1	0.992	UniRef:UniRef90_A0A098BSH9
contig_1	cds	1254294	1256579	-	ENBDON_01205	1378	0	1	1	0.986	UniRef:UniRef90_A0A385HJF0
contig_1	cds	1256654	1257877	-	ENBDON_01206	-	0	1	1	1	UniRef:UniRef100_UPI0025A1D658
contig_1	cds	1257932	1258372	-	ENBDON_01207	-	0	1	1	1	UniRef:UniRef100_A0A0M8PPC7
contig_1	cds	1258439	1258891	-	ENBDON_01208	-	0	1	1	1	UniRef:UniRef100_A0A0M8PNI9
contig_1	cds	1259048	1259989	+	ENBDON_01209	588	6e-212	1	0.991	0.955	UniRef:UniRef90_A0A098BTX9
contig_1	cds	1260075	1261121	+	ENBDON_01210	683	3.7e-248	1	1	0.989	UniRef:UniRef90_A0A098BSI4
contig_1	cds	1261168	1262070	+	ENBDON_01211	-	0	1	1	1	UniRef:UniRef100_A0A0M9WNQ3
contig_1	cds	1262244	1262522	-	ENBDON_01212	-	0	1	1	1	UniRef:UniRef100_A0A0M8PMP6
contig_1	cds	1262519	1263472	-	ENBDON_01213	609	4.3e-220	1	1	0.956	UniRef:UniRef90_A0A098BTY5
contig_1	ncRNA	1263087	1263154	+	ENBDON_01214	53.3	3.1e-07	-	-	-	RFAM:RF01781
contig_1	cds	1263534	1264454	-	ENBDON_01215	573	9.2e-206	1	0.956	0.967	UniRef:UniRef90_A0A8D4G051
contig_1	cds	1264636	1265274	+	ENBDON_01216	-	0	1	1	1	UniRef:UniRef100_A0A098BR37
contig_1	cds	1265283	1267010	-	ENBDON_01217	993	0	1.016	0.945	0.928	UniRef:UniRef90_A0A098BR65
contig_1	cds	1267136	1268488	+	ENBDON_01218	856	0	1	1	0.998	UniRef:UniRef90_A0A098BSI9
contig_1	cds	1268676	1269425	+	ENBDON_01219	507	9.4e-182	1	0.98	0.992	UniRef:UniRef90_A0A1B1KCF7
contig_1	cds	1269388	1270929	-	ENBDON_01220	852	0	1.004	1	0.932	UniRef:UniRef90_A0A385HJ86
contig_1	cds	1271117	1271770	-	ENBDON_01221	414	6.1e-146	1	0.939	0.977	UniRef:UniRef90_M2XL64
contig_1	cds	1271767	1272822	-	ENBDON_01222	-	0	1	1	1	UniRef:UniRef100_UPI0025A134CA
contig_1	cds	1272881	1273747	-	ENBDON_01223	548	5.5e-197	1	1	0.958	UniRef:UniRef90_A0A8D4FSC6
contig_1	cds	1273873	1274679	+	ENBDON_01224	-	0	1	1	1	UniRef:UniRef100_M2ZN11
contig_1	cds	1274676	1275173	+	ENBDON_01225	323	4.8e-112	1	1	0.939	UniRef:UniRef90_A0A098BR45
contig_1	cds	1275233	1275559	+	ENBDON_01226	199	1.8e-64	1	1	0.963	UniRef:UniRef90_M2XL67
contig_1	cds	1275564	1277090	-	ENBDON_01227	972	0	0.998	0.99	0.933	UniRef:UniRef90_A0A385HJF3
contig_1	cds	1277130	1278386	-	ENBDON_01228	789	1.5e-287	0.998	0.974	0.952	UniRef:UniRef90_A0A098BU01
contig_1	cds	1278424	1279029	+	ENBDON_01229	-	0	1	1	1	UniRef:UniRef100_UPI000F53A176
contig_1	cds	1279026	1280660	+	ENBDON_01230	1037	0	0.989	0.982	0.961	UniRef:UniRef90_A0A098BR49
contig_1	cds	1280755	1281573	+	ENBDON_01231	472	3.7e-167	1.007	1	0.92	UniRef:UniRef90_A0A098BR80
contig_1	cds	1281636	1283270	-	ENBDON_01232	1065	0	1	0.953	0.993	UniRef:UniRef90_M2Z3H0
contig_1	cds	1283341	1284801	+	ENBDON_01233	899	0	1	0.992	0.951	UniRef:UniRef90_A0A098BU06
contig_1	cds	1284916	1285224	-	ENBDON_01234	-	0	1	1	1	UniRef:UniRef100_A0A098BSK2
contig_1	cds	1285514	1287946	+	ENBDON_01235	1499	0	1.005	1	0.959	UniRef:UniRef90_A0A0M8PNK1
contig_1	cds	1288011	1289054	-	ENBDON_01236	630	1.8e-227	1	1	0.983	UniRef:UniRef90_M2XL76
contig_1	cds	1289344	1290984	+	ENBDON_01237	817	2.3e-294	1	0.963	0.969	UniRef:UniRef90_A0A0N0S0S9
contig_1	cds	1291129	1292298	+	ENBDON_01238	-	0	1	1	1	UniRef:UniRef100_A0A0M8PMQ9
contig_1	cds	1292314	1293216	+	ENBDON_01239	-	0	1	1	1	UniRef:UniRef100_A0A059MW10
contig_1	cds	1293292	1293915	-	ENBDON_01240	387	6.1e-136	1	0.99	0.952	UniRef:UniRef90_A0A098BSL3
contig_1	cds	1294023	1295276	+	ENBDON_01241	486	3.9e-168	1.024	1	0.89	UniRef:UniRef90_A0A098BU15
contig_1	cds	1295343	1296968	+	ENBDON_01242	793	6e-285	1.063	1.007	0.809	UniRef:UniRef90_A0A098BSL1
contig_1	cds	1297056	1297670	+	ENBDON_01243	390	4e-137	0.995	0.944	0.97	UniRef:UniRef90_A0A098BR64
contig_1	cds	1297657	1299222	+	ENBDON_01244	917	0	1.017	1	0.896	UniRef:UniRef90_A0A098BR96
contig_1	cds	1299280	1299516	-	ENBDON_01245	-	0	1	1	1	UniRef:UniRef100_A0A0M8PK25
contig_1	cds	1299619	1299729	-	ENBDON_01246	-	-	-	-	-	-
contig_1	cds	1299832	1300791	-	ENBDON_01247	-	0	1	1	1	UniRef:UniRef100_M2XL85
contig_1	cds	1300853	1301425	-	ENBDON_01248	-	0	1	1	1	UniRef:UniRef100_UPI0025A110D6
contig_1	cds	1301569	1302954	+	ENBDON_01249	823	4.5e-299	1	0.928	0.918	UniRef:UniRef90_M2ZLN1
contig_1	cds	1302954	1304891	+	ENBDON_01250	1146	0	1	1	0.944	UniRef:UniRef90_A0A098BRA1
contig_1	cds	1304947	1306113	-	ENBDON_01251	-	0	1	1	1	UniRef:UniRef100_M2YJ43
contig_1	cds	1306117	1306509	-	ENBDON_01252	-	0	1	1	1	UniRef:UniRef100_M2XL89
contig_1	cds	1306533	1307459	-	ENBDON_01253	539	2.5e-192	1	0.966	0.977	UniRef:UniRef90_A0A098BSL9
contig_1	cds	1307821	1308537	-	ENBDON_01254	-	0	1	1	1	UniRef:UniRef100_M2ZLN8
contig_1	cds	1308634	1309764	+	ENBDON_01255	714	1.5e-259	1	1	0.947	UniRef:UniRef90_A0A098BRA6
contig_1	cds	1309797	1310474	+	ENBDON_01256	-	0	1	1	1	UniRef:UniRef100_UPI0025A3078B
contig_1	cds	1310496	1311464	+	ENBDON_01257	615	2.3e-222	1	1	0.991	UniRef:UniRef90_M2XL95
contig_1	cds	1311466	1312275	+	ENBDON_01258	-	0	1	1	1	UniRef:UniRef100_A0A0M8PCL8
contig_1	cds	1312272	1313867	+	ENBDON_01259	959	0	1	1	0.983	UniRef:UniRef90_M2ZLP4
contig_1	cds	1313843	1314856	+	ENBDON_01260	539	1.5e-191	1	1	0.896	UniRef:UniRef90_A0A098BRB1
contig_1	cds	1314915	1315781	-	ENBDON_01261	514	1.3e-182	1	0.875	0.903	UniRef:UniRef90_A0A385HJM1
contig_1	cds	1315976	1316236	-	ENBDON_01262	-	0	1	1	1	UniRef:UniRef100_A0A098BU35
contig_1	cds	1316247	1316552	-	ENBDON_01263	-	0	1	1	1	UniRef:UniRef100_A0A0M8PK42
contig_1	cds	1316556	1316720	-	ENBDON_01264	-	0	1	1	1	UniRef:UniRef100_A0A059MWG8
contig_1	cds	1316720	1316956	-	ENBDON_01265	-	0	1	1	1	UniRef:UniRef100_A0A0M9WLU9
contig_1	cds	1317074	1318288	+	ENBDON_01266	785	8.2e-287	1	1	0.958	UniRef:UniRef90_A0A098BU40
contig_1	cds	1318285	1318539	+	ENBDON_01267	-	0	1	1	1	UniRef:UniRef100_A0A0M8PFD5
contig_1	cds	1318563	1318736	+	ENBDON_01268	103	2.3e-28	1	1	0.912	UniRef:UniRef90_A0A098BR88
contig_1	cds	1318834	1319520	+	ENBDON_01269	-	0	1	1	1	UniRef:UniRef100_A0A0M9WLU5
contig_1	cds	1319517	1320947	+	ENBDON_01270	-	0	1	1	1	UniRef:UniRef100_M2ZN62
contig_1	cds	1321042	1322289	+	ENBDON_01271	677	2.8e-243	1.029	1	0.892	UniRef:UniRef90_A0A098BSP0
contig_1	cds	1322286	1322861	+	ENBDON_01272	-	0	1	1	1	UniRef:UniRef100_A0A098BR93
contig_1	cds	1323648	1324505	+	ENBDON_01273	-	0	1	1	1	UniRef:UniRef100_UPI0025A13E84
contig_1	cds	1324558	1325199	+	ENBDON_01274	380	6.6e-133	1.042	1.005	0.91	UniRef:UniRef90_A0A098BU53
contig_1	cds	1325292	1325723	-	ENBDON_01275	-	0	1	1	1	UniRef:UniRef100_A0A2D2A397
contig_1	cds	1325822	1326511	-	ENBDON_01276	406	1.5e-142	1	1	0.987	UniRef:UniRef90_A0A0M8PKY3
contig_1	cds	1326580	1326762	+	ENBDON_01277	83.2	4.5e-20	1	1.071	0.767	UniRef:UniRef90_A0A098BRC9
contig_1	cds	1326987	1327592	-	ENBDON_01278	355	2.3e-123	1	1	0.925	UniRef:UniRef90_A0A098BU58
contig_1	cds	1327654	1328565	+	ENBDON_01279	-	0	1	1	1	UniRef:UniRef100_A0A385HJK6
contig_1	cds	1328598	1329857	+	ENBDON_01280	-	0	1	1	1	UniRef:UniRef100_A0A0M8PFC8
contig_1	cds	1329857	1330492	+	ENBDON_01281	-	0	1	1	1	UniRef:UniRef100_M2XLB6
contig_1	cds	1330718	1331566	+	ENBDON_01282	-	0	1	1	1	UniRef:UniRef100_A0A0N0S0D4
contig_1	cds	1331597	1332388	-	ENBDON_01283	497	3.3e-177	1	0.956	0.951	UniRef:UniRef90_A0A098BU63
contig_1	cds	1332385	1334034	-	ENBDON_01284	894	0	0.998	0.934	0.894	UniRef:UniRef90_N1MGH9
contig_1	tRNA	1334134	1334209	+	ENBDON_01285	84.2	-	-	-	-	-
contig_1	cds	1334319	1334462	+	ENBDON_01286	85.9	1.8e-21	1	1	0.979	UniRef:UniRef90_N1MFQ5
contig_1	cds	1334573	1335433	+	ENBDON_01287	540	1.1e-193	1	1	0.965	UniRef:UniRef90_A0A098BRD9
contig_1	cds	1335437	1336099	-	ENBDON_01288	392	3.2e-137	1	1	0.941	UniRef:UniRef90_A0A098BSR3
contig_1	cds	1336172	1337242	-	ENBDON_01289	580	3.6e-207	0.997	0.989	0.915	UniRef:UniRef90_A0A098BU69
contig_1	cds	1337328	1338536	+	ENBDON_01290	722	2.9e-261	1	0.933	0.995	UniRef:UniRef90_A0A098BSQ6
contig_1	cds	1338533	1339150	+	ENBDON_01291	-	0	1	1	1	UniRef:UniRef100_M2ZN88
contig_1	cds	1339154	1339621	-	ENBDON_01292	305	6.7e-105	1	1	0.923	UniRef:UniRef90_M2YJ77
contig_1	cds	1339736	1340941	+	ENBDON_01293	770	3.5e-280	0.998	0.891	0.988	UniRef:UniRef90_A0A098BSR8
contig_1	cds	1340965	1341312	-	ENBDON_01294	-	0	1	1	1	UniRef:UniRef100_A0A0M8PQN0
contig_1	cds	1341428	1341790	+	ENBDON_01295	226	4.5e-75	1	1	0.967	UniRef:UniRef90_A0A098BSR1
contig_1	cds	1341787	1343499	+	ENBDON_01296	998	0	0.951	0.985	0.978	UniRef:UniRef90_A0A059MWM0
contig_1	cds	1343496	1344056	+	ENBDON_01297	338	5.3e-117	1	1	0.957	UniRef:UniRef90_N1MAX1
contig_1	cds	1344007	1345515	-	ENBDON_01298	1017	0	1	0.969	0.976	UniRef:UniRef90_A0A385HJN9
contig_1	cds	1345587	1346447	+	ENBDON_01299	497	8.7e-177	1	1	0.93	UniRef:UniRef90_A0A098BSS4
contig_1	cds	1346481	1347875	+	ENBDON_01300	-	0	1	1	1	UniRef:UniRef100_A0A0M8PI79
contig_1	cds	1347889	1348002	-	ENBDON_01301	58.2	9.5e-11	1	1	0.919	UniRef:UniRef90_A0A385HJM7
contig_1	cds	1348248	1352231	+	ENBDON_01302	1620	0	1	0.998	0.938	UniRef:UniRef90_A0A385HJG2
contig_1	cds	1352170	1353483	-	ENBDON_01303	846	0	1.023	1	0.953	UniRef:UniRef90_M2ZN99
contig_1	cds	1353534	1354454	-	ENBDON_01304	-	0	1	1	1	UniRef:UniRef100_A0A0M9WPV4
contig_1	cds	1354451	1355596	-	ENBDON_01305	726	2.9e-264	1	1	0.984	UniRef:UniRef90_M2XLE3
contig_1	cds	1355684	1356877	-	ENBDON_01306	721	1.9e-261	0.997	0.997	0.975	UniRef:UniRef90_A0A0M8PPV2
contig_1	cds	1356905	1358452	-	ENBDON_01307	1008	0	1	1	0.975	UniRef:UniRef90_A0A098BSS0
contig_1	cds	1358489	1359319	+	ENBDON_01308	519	1.2e-185	1	1	0.953	UniRef:UniRef90_A0A098BRC7
contig_1	cds	1359363	1360430	+	ENBDON_01309	632	1.2e-227	1	1	0.941	UniRef:UniRef90_A0A098BRF8
contig_1	cds	1360614	1361591	-	ENBDON_01310	627	1.1e-226	0.997	0.994	0.948	UniRef:UniRef90_A0A098BST6
contig_1	cds	1361592	1362101	-	ENBDON_01311	318	1e-109	0.982	0.902	0.958	UniRef:UniRef90_A0A098BU89
contig_1	cds	1362298	1362723	+	ENBDON_01312	256	3.8e-86	1	1	0.95	UniRef:UniRef90_M2ZLW1
contig_1	cds	1362766	1363536	-	ENBDON_01313	490	4.8e-175	1	1	0.992	UniRef:UniRef90_A0A059MWC0
contig_1	cds	1363533	1364933	-	ENBDON_01314	865	0	1	0.957	0.998	UniRef:UniRef90_M2YJA1
contig_1	cds	1365219	1366346	+	ENBDON_01315	644	1e-231	1	0.954	0.904	UniRef:UniRef90_A0A098BSU1
contig_1	cds	1366359	1366547	+	ENBDON_01316	98.2	6.9e-26	1	0.954	0.887	UniRef:UniRef90_M2Z3P9
contig_1	cds	1366616	1367530	+	ENBDON_01317	-	0	1	1	1	UniRef:UniRef100_UPI0006C8C6AA
contig_1	cds	1367770	1367976	+	ENBDON_01318	-	0	1	1	1	UniRef:UniRef100_N1MB11
contig_1	cds	1368388	1368594	+	ENBDON_01319	-	0	1	1	1	UniRef:UniRef100_N1MA82
contig_1	cds	1368677	1369666	-	ENBDON_01320	587	1.8e-210	1	0.959	0.909	UniRef:UniRef90_A0A098BUA0
contig_1	cds	1369742	1370668	+	ENBDON_01321	-	0	1	1	1	UniRef:UniRef100_A0A0M8PPU5
contig_1	cds	1370690	1372486	+	ENBDON_01322	1118	0	0.995	0.988	0.983	UniRef:UniRef90_A0A931HHB7
contig_1	cds	1372772	1373566	-	ENBDON_01323	-	0	1	1	1	UniRef:UniRef100_A0A0N0S1D8
contig_1	cds	1373563	1375077	-	ENBDON_01324	898	0	1.004	1	0.917	UniRef:UniRef90_M2XLG1
contig_1	cds	1375190	1375798	+	ENBDON_01325	358	3.5e-124	1.01	0.944	0.936	UniRef:UniRef90_N1M541
contig_1	cds	1375896	1376375	+	ENBDON_01326	-	0	1	1	1	UniRef:UniRef100_A0A0M9WPU3
contig_1	cds	1376421	1376867	+	ENBDON_01327	-	0	1	1	1	UniRef:UniRef100_A0A0M8PIL9
contig_1	cds	1376952	1377989	+	ENBDON_01328	632	5.4e-228	1	1	0.939	UniRef:UniRef90_A0A098BRH8
contig_1	cds	1378081	1378593	-	ENBDON_01329	313	9.1e-108	1	1	0.976	UniRef:UniRef90_M2Z3R5
contig_1	cds	1378700	1380370	-	ENBDON_01330	976	0	1.014	1	0.897	UniRef:UniRef90_A0A098BUB0
contig_1	cds	1380588	1382222	+	ENBDON_01331	1053	0	1	1	0.976	UniRef:UniRef90_A0A098BRF2
contig_1	cds	1382270	1382842	-	ENBDON_01332	-	0	1	1	1	UniRef:UniRef100_A0A0M9WPU2
contig_1	cds	1382946	1383551	-	ENBDON_01333	328	7.5e-113	1	1	0.881	UniRef:UniRef90_A0A098BSW3
contig_1	cds	1383756	1385225	-	ENBDON_01334	900	0	0.996	0.966	0.928	UniRef:UniRef90_M2Z3S1
contig_1	cds	1385314	1386492	-	ENBDON_01335	721	6.4e-262	1	1	0.962	UniRef:UniRef90_A0A059MWE0
contig_1	cds	1386538	1387779	+	ENBDON_01336	607	1e-215	0.998	0.979	0.91	UniRef:UniRef90_A0A098BRF6
contig_1	cds	1387859	1389091	+	ENBDON_01337	764	6.3e-278	1	0.958	0.954	UniRef:UniRef90_A0A098BRJ0
contig_1	cds	1389088	1390383	+	ENBDON_01338	-	0	1	1	1	UniRef:UniRef100_M2XLH6
contig_1	cds	1390376	1391122	+	ENBDON_01339	-	0	1	1	1	UniRef:UniRef100_A0A0M8PI61
contig_1	cds	1391119	1392075	+	ENBDON_01340	-	0	1	1	1	UniRef:UniRef100_UPI0025A27A85
contig_1	cds	1392147	1393343	+	ENBDON_01341	-	0	1	1	1	UniRef:UniRef100_A0A0M8PPT3
contig_1	cds	1393348	1394577	-	ENBDON_01342	662	3.1e-237	1.044	0.97	0.897	UniRef:UniRef90_M2YJE7
contig_1	cds	1394632	1395273	+	ENBDON_01343	-	0	1	1	1	UniRef:UniRef100_A0A0M9WPT3
contig_1	cds	1395368	1397929	-	ENBDON_01344	1639	0	1	1	0.989	UniRef:UniRef90_A0A385HJK5
contig_1	cds	1398167	1398820	-	ENBDON_01345	-	0	1	1	1	UniRef:UniRef100_A0A0M8PRG1
contig_1	cds	1399015	1399644	-	ENBDON_01346	-	0	1	1	1	UniRef:UniRef100_A0A0M9WPU8
contig_1	cds	1399699	1400679	-	ENBDON_01347	-	0	1	1	1	UniRef:UniRef100_A0A098BRK0
contig_1	cds	1400676	1402154	-	ENBDON_01348	-	0	1	1	1	UniRef:UniRef100_UPI0025A0AAB6
contig_1	tRNA	1402226	1402297	-	ENBDON_01349	52.3	-	-	-	-	-
contig_1	cds	1402486	1403127	+	ENBDON_01350	411	5e-145	1	0.986	0.995	UniRef:UniRef90_A0A098BUD1
contig_1	cds	1403287	1403922	+	ENBDON_01351	401	3.6e-141	1	1	0.986	UniRef:UniRef90_A0A098BSW1
contig_1	cds	1403974	1404306	+	ENBDON_01352	193	5.8e-62	1	0.902	0.945	UniRef:UniRef90_A0A098BRG9
contig_1	cds	1404319	1404888	+	ENBDON_01353	351	3.1e-122	0.995	0.995	0.963	UniRef:UniRef90_A0A0M8PPS7
contig_1	cds	1405032	1408664	+	ENBDON_01354	2270	0	1	0.98	0.978	UniRef:UniRef90_A0A098BSY4
contig_1	cds	1408794	1409681	+	ENBDON_01355	531	1.7e-189	1	0.952	0.908	UniRef:UniRef90_A0A098BUD6
contig_1	cds	1409666	1411036	-	ENBDON_01356	-	0	1	1	1	UniRef:UniRef100_A0A098BSW7
contig_1	cds	1411329	1412723	+	ENBDON_01357	-	0	1	1	1	UniRef:UniRef100_A0A098BRH4
contig_1	cds	1413012	1413794	-	ENBDON_01358	485	9.3e-173	1.004	1	0.939	UniRef:UniRef90_A0A098BRL0
contig_1	cds	1413959	1415347	+	ENBDON_01359	862	0	1	0.939	0.996	UniRef:UniRef90_M2ZGT4
contig_1	cds	1415344	1416840	+	ENBDON_01360	924	0	1	1	0.996	UniRef:UniRef90_A0A098BUE1
contig_1	cds	1416837	1417904	+	ENBDON_01361	701	4.3e-255	1	1	0.992	UniRef:UniRef90_A0A098BSX2
contig_1	cds	1417901	1420174	+	ENBDON_01362	1470	0	1	1	0.997	UniRef:UniRef90_A0A098BRH9
contig_1	cds	1420171	1421388	+	ENBDON_01363	-	0	1	1	1	UniRef:UniRef100_A0A098BRL5
contig_1	cds	1421390	1422826	-	ENBDON_01364	983	0	1	0.925	0.992	UniRef:UniRef90_A0A385HJU1
contig_1	cds	1423023	1424981	+	ENBDON_01365	1305	0	1	0.909	0.992	UniRef:UniRef90_A0A385HJM8
contig_1	cds	1425223	1426410	+	ENBDON_01366	-	0	1	1	1	UniRef:UniRef100_M2YX23
contig_1	cds	1426413	1427444	+	ENBDON_01367	671	1.5e-243	1	0.991	0.991	UniRef:UniRef90_A0A098BRI4
contig_1	cds	1427531	1428985	+	ENBDON_01368	871	0	1	0.945	0.99	UniRef:UniRef90_M3A0L8
contig_1	cds	1428970	1429539	+	ENBDON_01369	382	1.4e-134	1	1	0.989	UniRef:UniRef90_A0A098BSZ8
contig_1	cds	1429506	1430636	-	ENBDON_01370	712	8.4e-259	1	1	0.989	UniRef:UniRef90_A0A098BUF0
contig_1	cds	1430690	1431262	+	ENBDON_01371	381	4.3e-134	1	1	0.995	UniRef:UniRef90_A0A385HJY9
contig_1	cds	1431283	1432323	-	ENBDON_01372	670	4.8e-243	1	1	0.977	UniRef:UniRef90_A0A098BRI9
contig_1	cds	1432334	1432978	-	ENBDON_01373	-	0	1	1	1	UniRef:UniRef100_A0A098BRM4
contig_1	cds	1432975	1433769	-	ENBDON_01374	556	7.6e-201	1	1	0.996	UniRef:UniRef90_A0A098BT02
contig_1	cds	1433766	1435022	-	ENBDON_01375	804	8.4e-294	1	1	0.957	UniRef:UniRef90_A0A098BUF5
contig_1	cds	1435269	1435730	+	ENBDON_01376	-	0	1	1	1	UniRef:UniRef100_A0A098BRJ3
contig_1	cds	1435727	1436152	+	ENBDON_01377	286	3.4e-98	1	1	0.979	UniRef:UniRef90_M3A1W0
contig_1	cds	1436354	1437049	+	ENBDON_01378	466	4e-166	1	1	0.996	UniRef:UniRef90_A0A0M9WPS0
contig_1	cds	1437046	1439178	+	ENBDON_01379	1315	0	1	1	0.961	UniRef:UniRef90_A0A098BUG0
contig_1	cds	1439223	1441079	+	ENBDON_01380	1153	0	1	1	0.95	UniRef:UniRef90_A0A385HJP8
contig_1	cds	1441169	1442713	+	ENBDON_01381	983	0	1	1	0.986	UniRef:UniRef90_A0A098BRJ6
contig_1	cds	1442748	1444013	-	ENBDON_01382	777	5.5e-283	1.007	1	0.925	UniRef:UniRef90_A0A098BRN5
contig_1	cds	1444010	1445149	-	ENBDON_01383	681	3.3e-246	1	1	0.929	UniRef:UniRef90_A0A098BT13
contig_1	cds	1445179	1446057	-	ENBDON_01384	488	8.9e-173	1	1	0.938	UniRef:UniRef90_UPI0007440788
contig_1	cds	1446197	1446958	+	ENBDON_01385	485	4.1e-173	1	0.988	0.945	UniRef:UniRef90_A0A098BSZ5
contig_1	cds	1447112	1448398	+	ENBDON_01386	-	0	1	1	1	UniRef:UniRef100_A0A0M9WPS8
contig_1	cds	1448409	1449071	+	ENBDON_01387	-	0	1	1	1	UniRef:UniRef100_UPI000660DA8F
contig_1	cds	1449068	1449595	+	ENBDON_01388	-	0	1	1	1	UniRef:UniRef100_A0A098BUG9
contig_1	cds	1449592	1450548	+	ENBDON_01389	571	9.1e-205	0.991	0.952	0.937	UniRef:UniRef90_N1M7C5
contig_1	tRNA	1450667	1450743	+	ENBDON_01390	78.2	-	-	-	-	-
contig_1	cds	1450927	1451718	+	ENBDON_01391	520	2.8e-186	1	0.939	0.981	UniRef:UniRef90_M2Y031
contig_1	cds	1451900	1452070	+	ENBDON_01392	-	0	1	1	1	UniRef:UniRef100_A0A385HK11
contig_1	cds	1452102	1452281	-	ENBDON_01393	-	0	1	1	1	UniRef:UniRef100_UPI00034D3A2E
contig_1	cds	1452395	1452547	-	ENBDON_01394	-	0	1	1	1	UniRef:UniRef100_UPI0025A1563E
contig_1	cds	1452602	1453177	-	ENBDON_01395	371	4.3e-130	0.99	0.99	0.937	UniRef:UniRef90_A0A8D4K425
contig_1	cds	1453194	1454342	-	ENBDON_01396	731	3.2e-266	0.992	0.992	0.918	UniRef:UniRef90_A0A1Y5LGF3
contig_1	cds	1454454	1455155	-	ENBDON_01397	468	4e-167	1	1	0.991	UniRef:UniRef90_A0A385HJR1
contig_1	cds	1455453	1455596	-	ENBDON_01398	-	0	1	1	1	UniRef:UniRef100_A0A098BT27
contig_1	cds	1455954	1457450	+	ENBDON_01399	-	0	1	1	1	UniRef:UniRef100_UPI001AEA05BA
contig_1	cds	1457523	1457720	-	ENBDON_01400	-	0	1	1	1	UniRef:UniRef100_A0A098BT10
contig_1	cds	1457831	1458022	+	ENBDON_01401	-	0	1	1	1	UniRef:UniRef100_A0A098BRL6
contig_1	cds	1458054	1459109	-	ENBDON_01402	634	1.7e-228	1.009	1	0.915	UniRef:UniRef90_A0A098BRQ5
contig_1	cds	1459106	1462600	-	ENBDON_01403	2221	0	1.006	1	0.975	UniRef:UniRef90_A0A385HKH2
contig_1	cds	1462762	1463121	+	ENBDON_01404	-	0	1	1	1	UniRef:UniRef100_A0A0M8PJM7
contig_1	cds	1463115	1464260	+	ENBDON_01405	663	2.8e-239	1	1	0.932	UniRef:UniRef90_A0A059MVZ3
contig_1	cds	1464356	1465207	+	ENBDON_01406	-	0	1	1	1	UniRef:UniRef100_M2Y018
contig_1	cds	1465204	1466166	-	ENBDON_01407	608	1.1e-219	1	1	0.988	UniRef:UniRef90_A0A098BRR2
contig_1	cds	1466300	1467685	+	ENBDON_01408	-	0	1	1	1	UniRef:UniRef100_A0A0M8PLC3
contig_1	cds	1467757	1468911	+	ENBDON_01409	-	0	1	1	1	UniRef:UniRef100_M3A0I1
contig_1	cds	1469110	1470507	+	ENBDON_01410	-	0	1	1	1	UniRef:UniRef100_UPI0005950855
contig_1	cds	1470595	1471089	-	ENBDON_01411	-	0	1	1	1	UniRef:UniRef100_A0A059MVZ8
contig_1	cds	1471313	1471744	-	ENBDON_01412	262	2.4e-88	1	0.993	0.916	UniRef:UniRef90_N1M833
contig_1	cds	1471899	1472777	+	ENBDON_01413	-	0	1	1	1	UniRef:UniRef100_M3A1R2
contig_1	cds	1472774	1473091	+	ENBDON_01414	-	0	1	1	1	UniRef:UniRef100_UPI0025A15471
contig_1	cds	1473102	1475129	+	ENBDON_01415	1284	0	1	1	0.956	UniRef:UniRef90_A0A5M3YDH3
contig_1	cds	1475142	1476056	-	ENBDON_01416	-	0	1	1	1	UniRef:UniRef100_UPI0019319E8D
contig_1	cds	1476119	1476787	-	ENBDON_01417	451	1.2e-160	1	1	0.977	UniRef:UniRef90_A0A098BT48
contig_1	cds	1476951	1477718	+	ENBDON_01418	-	0	1	1	1	UniRef:UniRef100_M3A1Q6
contig_1	cds	1477780	1478712	-	ENBDON_01419	-	0	1	1	1	UniRef:UniRef100_A0A098BT30
contig_1	cds	1478885	1480075	+	ENBDON_01420	776	1.7e-283	1	0.99	0.972	UniRef:UniRef90_A0A385HK04
contig_1	cds	1480187	1481482	+	ENBDON_01421	821	4.6e-300	1	1	0.97	UniRef:UniRef90_V9XM78
contig_1	cds	1481749	1483104	+	ENBDON_01422	868	0	1	1	0.984	UniRef:UniRef90_A0A098BUK3
contig_1	cds	1483226	1483636	-	ENBDON_01423	257	9.2e-87	1	1	0.963	UniRef:UniRef90_A0A098BT35
contig_1	cds	1483689	1484114	-	ENBDON_01424	-	0	1	1	1	UniRef:UniRef100_UPI0025A2704A
contig_1	cds	1484111	1485724	-	ENBDON_01425	988	0	1	1	0.94	UniRef:UniRef90_A0A098BRT3
contig_1	cds	1485981	1486568	+	ENBDON_01426	272	8.3e-91	1	1	0.964	UniRef:UniRef90_M2XZZ5
contig_1	cds	1486588	1487571	-	ENBDON_01427	-	0	1	1	1	UniRef:UniRef100_A0A0M9WN86
contig_1	cds	1487611	1488408	-	ENBDON_01428	-	0	1	1	1	UniRef:UniRef100_A0A0M8PFK1
contig_1	cds	1488411	1489661	-	ENBDON_01429	-	0	1	1	1	UniRef:UniRef100_UPI0025A0893D
contig_1	cds	1489831	1490307	+	ENBDON_01430	304	1.2e-104	1	1	0.968	UniRef:UniRef90_A0A098BT63
contig_1	cds	1490374	1491756	-	ENBDON_01431	833	1.2e-303	1	1	0.933	UniRef:UniRef90_A0A098BUL3
contig_1	cds	1491908	1493425	+	ENBDON_01432	955	0	1.004	1	0.976	UniRef:UniRef90_A0A5M3Y9Z4
contig_1	cds	1493479	1494453	-	ENBDON_01433	-	0	1	1	1	UniRef:UniRef100_A0A0M9WN93
contig_1	cds	1494539	1495948	-	ENBDON_01434	-	0	1	1	1	UniRef:UniRef100_UPI0025A07758
contig_1	cds	1496033	1497070	-	ENBDON_01435	-	0	1	1	1	UniRef:UniRef100_A0A098BT69
contig_1	cds	1497249	1497818	+	ENBDON_01436	-	0	1	1	1	UniRef:UniRef100_UPI0009BF6E90
contig_1	cds	1497832	1498107	-	ENBDON_01437	-	0	1	1	1	UniRef:UniRef100_M2YWV4
contig_1	cds	1498118	1499365	-	ENBDON_01438	757	3.7e-275	1	1	0.954	UniRef:UniRef90_A0A098BTW0
contig_1	cds	1499362	1500111	-	ENBDON_01439	290	4.5e-96	1	0.992	0.928	UniRef:UniRef90_A0A098BTQ4
contig_1	cds	1500209	1501210	+	ENBDON_01440	-	0	1	1	1	UniRef:UniRef100_A0A0M8PF85
contig_1	cds	1501227	1502144	-	ENBDON_01441	485	5.9e-171	1.023	0.957	0.926	UniRef:UniRef90_A0A098BWN1
contig_1	cds	1502210	1503409	-	ENBDON_01442	-	0	1	1	1	UniRef:UniRef100_M2YWU9
contig_1	cds	1503458	1504633	+	ENBDON_01443	712	3.8e-258	1	1	0.944	UniRef:UniRef90_A0A098BTW3
contig_1	cds	1504630	1507605	+	ENBDON_01444	1492	0	1	1	0.947	UniRef:UniRef90_A0A098BTQ9
contig_1	cds	1507616	1508794	-	ENBDON_01445	672	1.6e-242	1.008	1	0.959	UniRef:UniRef90_M2ZGJ5
contig_1	cds	1508810	1509331	+	ENBDON_01446	247	1.8e-81	1	1	0.988	UniRef:UniRef90_M2XZX4
contig_1	cds	1509318	1509962	+	ENBDON_01447	412	1.7e-145	1	1	0.977	UniRef:UniRef90_A0A2I6KZJ5
contig_1	cds	1509975	1511054	+	ENBDON_01448	-	0	1	1	1	UniRef:UniRef100_A0A0M8PNH2
contig_1	cds	1511333	1512232	-	ENBDON_01449	-	-	-	-	-	-
contig_1	tRNA	1512497	1512582	-	ENBDON_01450	35.7	-	-	-	-	-
contig_1	cds	1512918	1514144	+	ENBDON_01451	817	2.5e-299	1	1	0.978	UniRef:UniRef90_A0A098BTR4
contig_1	cds	1514144	1514362	+	ENBDON_01452	135	1.7e-40	0.986	0.899	0.873	UniRef:UniRef90_UPI0011D0196B
contig_1	cds	1514364	1514777	+	ENBDON_01453	238	5.9e-79	1	1	0.934	UniRef:UniRef90_A0A098BWP1
contig_1	cds	1515604	1515915	+	ENBDON_01454	207	7.7e-68	1	1	0.981	UniRef:UniRef90_A0A098BTW7
contig_1	cds	1515912	1516508	+	ENBDON_01455	407	4.8e-144	1	1	0.97	UniRef:UniRef90_A0A098BTR8
contig_1	cds	1517194	1519410	+	ENBDON_01456	1350	0	1.003	1	0.908	UniRef:UniRef90_A0A098BVB6
contig_1	cds	1519675	1520100	+	ENBDON_01457	168	1.6e-51	0.844	0.902	0.689	UniRef:UniRef90_UPI001E418B1A
contig_1	cds	1520060	1520458	+	ENBDON_01458	-	-	-	-	-	-
contig_1	cds	1520722	1521999	+	ENBDON_01459	808	3e-295	1	1	0.946	UniRef:UniRef90_A0A098BVB0
contig_1	cds	1522003	1523415	-	ENBDON_01460	666	2.7e-237	1	0.965	0.698	UniRef:UniRef90_UPI0011DE13B6
contig_1	cds	1523641	1524618	-	ENBDON_01461	-	0	1	1	1	UniRef:UniRef100_A0A0M9WN89
contig_1	cds	1524740	1525702	-	ENBDON_01462	552	3.2e-197	1	0.958	0.959	UniRef:UniRef90_M2ZGJ1
contig_1	cds	1525869	1526483	-	ENBDON_01463	380	6.3e-133	0.99	0.918	0.926	UniRef:UniRef90_A0A098BVB4
contig_1	cds	1526752	1527219	+	ENBDON_01464	294	9.1e-101	0.994	0.987	0.968	UniRef:UniRef90_A0A0M8PF77
contig_1	cds	1527454	1527660	+	ENBDON_01465	-	0	1	1	1	UniRef:UniRef100_A0A0M9WN79
contig_1	cds	1527741	1528964	+	ENBDON_01466	775	1.4e-282	1	1	0.998	UniRef:UniRef90_A0A098BTX1
contig_1	cds	1528951	1530573	-	ENBDON_01467	-	0	1	1	1	UniRef:UniRef100_A0A0M9WN78
contig_1	cds	1530599	1532254	-	ENBDON_01468	-	0	1	1	1	UniRef:UniRef100_M2XZW3
contig_1	cds	1532387	1532674	+	ENBDON_01469	169	4.8e-53	0.958	1	0.989	UniRef:UniRef90_M2YWT2
contig_1	cds	1532701	1533183	-	ENBDON_01470	-	0	1	1	1	UniRef:UniRef100_M3A1K3
contig_1	cds	1533180	1533512	-	ENBDON_01471	-	0	1	1	1	UniRef:UniRef100_M3A0C8
contig_1	cds	1533579	1534076	+	ENBDON_01472	325	1.3e-112	1	0.982	0.994	UniRef:UniRef90_M2ZGI1
contig_1	cds	1534191	1537487	+	ENBDON_01473	2062	0	1	0.988	0.934	UniRef:UniRef90_A0A059MSW6
contig_1	cds	1537484	1540780	+	ENBDON_01474	2111	0	1	0.988	0.995	UniRef:UniRef90_A0A0M9WPD5
contig_1	cds	1540777	1542645	+	ENBDON_01475	1144	0	1.005	0.997	0.95	UniRef:UniRef90_A0A098BVC3
contig_1	cds	1542669	1543802	-	ENBDON_01476	716	7.8e-260	0.966	0.899	0.951	UniRef:UniRef90_A0A059MTA2
contig_1	cds	1543918	1545546	-	ENBDON_01477	993	0	1	1	0.928	UniRef:UniRef90_A0A098BTU2
contig_1	cds	1545635	1546384	-	ENBDON_01478	-	0	1	1	1	UniRef:UniRef100_A0A0M9WPC2
contig_1	cds	1546482	1547297	-	ENBDON_01479	513	1.6e-183	1	1	0.967	UniRef:UniRef90_A0A098BWS1
contig_1	cds	1547396	1548124	+	ENBDON_01480	425	9.5e-150	1	1	0.938	UniRef:UniRef90_A0A098BVC8
contig_1	cds	1548121	1548780	+	ENBDON_01481	407	2.4e-143	0.995	0.995	0.94	UniRef:UniRef90_A0A098BTX6
contig_1	cds	1548785	1550344	-	ENBDON_01482	966	0	1	1	0.952	UniRef:UniRef90_A0A098BTX7
contig_1	cds	1550438	1551520	-	ENBDON_01483	-	0	1	1	1	UniRef:UniRef100_M2XW79
contig_1	cds	1551551	1552432	-	ENBDON_01484	500	1e-177	0.932	0.922	0.945	UniRef:UniRef90_A0A385HKG2
contig_1	cds	1552432	1553397	-	ENBDON_01485	-	0	1	1	1	UniRef:UniRef100_A0A0N0S0X6
contig_1	cds	1553394	1554749	-	ENBDON_01486	-	0	1	1	1	UniRef:UniRef100_M2ZY08
contig_1	cds	1554785	1555780	-	ENBDON_01487	591	5.1e-212	1.012	0.96	0.934	UniRef:UniRef90_A0A098BTY3
contig_1	cds	1555923	1556939	+	ENBDON_01488	630	1.4e-227	1	0.966	0.962	UniRef:UniRef90_A0A098BWT0
contig_1	cds	1556951	1558423	+	ENBDON_01489	956	0	1.002	1	0.963	UniRef:UniRef90_A0A098BVF8
contig_1	cds	1558420	1559346	+	ENBDON_01490	530	3.7e-189	1	1	0.929	UniRef:UniRef90_M2ZWY3
contig_1	cds	1559343	1560752	+	ENBDON_01491	866	0	0.991	0.983	0.963	UniRef:UniRef90_A0A098BTY8
contig_1	cds	1560766	1560939	-	ENBDON_01492	-	0	1	1	1	UniRef:UniRef100_A0A842H521
contig_1	cds	1561149	1561619	+	ENBDON_01493	-	0	1	1	1	UniRef:UniRef100_A0A0M8PNW0
contig_1	cds	1561668	1562981	+	ENBDON_01494	764	3.8e-277	1.002	1	0.929	UniRef:UniRef90_M2XW89
contig_1	cds	1563374	1564201	+	ENBDON_01495	-	0	1	1	1	UniRef:UniRef100_M2ZD79
contig_1	cds	1564247	1565041	+	ENBDON_01496	476	5.9e-169	0.996	0.989	0.909	UniRef:UniRef90_A0A098BTZ3
contig_1	cds	1565038	1565826	+	ENBDON_01497	492	1.3e-175	1	1	0.981	UniRef:UniRef90_A0A098BVE0
contig_1	cds	1565829	1566026	+	ENBDON_01498	-	0	1	1	1	UniRef:UniRef100_A0A0M9WPC0
contig_1	cds	1566313	1567332	-	ENBDON_01499	627	2.3e-226	1	1	0.944	UniRef:UniRef90_A0A098BTZ7
contig_1	cds	1567453	1568667	+	ENBDON_01500	819	1.2e-299	1	0.918	0.973	UniRef:UniRef90_A0A0H5NG11
contig_1	cds	1568670	1569698	+	ENBDON_01501	651	1.9e-235	0.997	0.95	0.938	UniRef:UniRef90_A0A0M8PK15
contig_1	cds	1569747	1570769	-	ENBDON_01502	667	3.1e-242	1	0.983	0.997	UniRef:UniRef90_A0A098BVH6
contig_1	cds	1570979	1572541	+	ENBDON_01503	1035	0	0.998	0.992	0.958	UniRef:UniRef90_A0A098BU02
contig_1	cds	1572570	1573082	+	ENBDON_01504	-	0	1	1	1	UniRef:UniRef100_M2XW97
contig_1	cds	1573214	1574563	+	ENBDON_01505	863	0	1	1	0.987	UniRef:UniRef90_M2ZD87
contig_1	cds	1574617	1575045	-	ENBDON_01506	256	5.9e-86	1	1	0.944	UniRef:UniRef90_M2ZWZ5
contig_1	cds	1575080	1575832	-	ENBDON_01507	-	0	1	1	1	UniRef:UniRef100_A0A0M8PNV4
contig_1	cds	1575898	1577376	-	ENBDON_01508	950	0	1	1	0.963	UniRef:UniRef90_A0A098BU08
contig_1	cds	1577392	1578483	-	ENBDON_01509	655	1.6e-236	1	1	0.983	UniRef:UniRef90_Q0S9W9
contig_1	cds	1578480	1579358	-	ENBDON_01510	504	3.5e-179	1	1	0.904	UniRef:UniRef90_Q0S9X0
contig_1	cds	1579578	1580672	+	ENBDON_01511	-	0	1	1	1	UniRef:UniRef100_UPI0025A1C1D7
contig_1	cds	1581149	1581538	+	ENBDON_01512	-	0	1	1	1	UniRef:UniRef100_M2ZY29
contig_1	cds	1581634	1582053	+	ENBDON_01513	-	0	1	1	1	UniRef:UniRef100_M2YTH6
contig_1	cds	1582063	1582602	-	ENBDON_01514	305	1e-104	0.838	1	0.98	UniRef:UniRef90_A0A098BVJ1
contig_1	cds	1582627	1583796	+	ENBDON_01515	-	0	1	1	1	UniRef:UniRef100_A0A0M8PHX7
contig_1	cds	1583845	1585542	-	ENBDON_01516	-	0	1	1	1	UniRef:UniRef100_A0A0M8PK10
contig_1	cds	1585816	1586571	+	ENBDON_01517	447	1.2e-157	1	0.887	0.94	UniRef:UniRef90_A0A098BU18
contig_1	cds	1586620	1587144	+	ENBDON_01518	-	0	1	1	1	UniRef:UniRef100_A0A0M9WPB6
contig_1	cds	1587155	1587370	-	ENBDON_01519	-	0	1	1	1	UniRef:UniRef100_M2YTI1
contig_1	cds	1587460	1588251	-	ENBDON_01520	-	0	1	1	1	UniRef:UniRef100_M2XWB2
contig_1	cds	1588379	1588714	+	ENBDON_01521	223	7.7e-74	0.982	0.982	0.945	UniRef:UniRef90_A0A059MSQ0
contig_1	cds	1588734	1589300	-	ENBDON_01522	353	1.9e-122	0.995	0.866	0.957	UniRef:UniRef90_A0A098BU22
contig_1	cds	1589459	1590403	+	ENBDON_01523	-	0	1	1	1	UniRef:UniRef100_A0A0M8PPN0
contig_1	cds	1590520	1591242	+	ENBDON_01524	-	0	1	1	1	UniRef:UniRef100_A0A0M8PQI2
contig_1	cds	1591229	1592656	-	ENBDON_01525	-	0	1	1	1	UniRef:UniRef100_A0A0M9WPC1
contig_1	cds	1592773	1593120	-	ENBDON_01526	-	0	1	1	1	UniRef:UniRef100_M2XWB6
contig_1	cds	1593215	1594042	-	ENBDON_01527	487	6.8e-173	1	0.968	0.942	UniRef:UniRef90_A0A098BU27
contig_1	cds	1594400	1595662	+	ENBDON_01528	840	9.3e-308	1	1	0.993	UniRef:UniRef90_M2ZX12
contig_1	cds	1595607	1595894	-	ENBDON_01529	188	9e-61	1	1	0.989	UniRef:UniRef90_A0A098BWX0
contig_1	cds	1595920	1596324	+	ENBDON_01530	-	0	1	1	1	UniRef:UniRef100_UPI000371872D
contig_1	cds	1596340	1596516	-	ENBDON_01531	-	0	1	1	1	UniRef:UniRef100_A0A098BU33
contig_1	cds	1596874	1598760	+	ENBDON_01532	1104	0	0.998	0.956	0.903	UniRef:UniRef90_H6RDL1
contig_1	cds	1598845	1600701	+	ENBDON_01533	1019	0	1.105	1	0.817	UniRef:UniRef90_M2ZX17
contig_1	cds	1600698	1601585	+	ENBDON_01534	584	6.3e-211	1	1	0.983	UniRef:UniRef90_A0A0M8PPM4
contig_1	cds	1601636	1601794	+	ENBDON_01535	-	0	1	1	1	UniRef:UniRef100_M2YTJ5
contig_1	cds	1601847	1602284	+	ENBDON_01536	-	0	1	1	1	UniRef:UniRef100_M2XWC5
contig_1	cds	1602247	1602984	-	ENBDON_01537	-	0	1	1	1	UniRef:UniRef100_M2ZDB4
contig_1	cds	1602981	1604534	-	ENBDON_01538	923	0	1	1	0.961	UniRef:UniRef90_A0A098BVH8
contig_1	cds	1604531	1605073	-	ENBDON_01539	325	5.2e-112	1	1	0.95	UniRef:UniRef90_A0A098BWY0
contig_1	cds	1605184	1605372	+	ENBDON_01540	-	0	1	1	1	UniRef:UniRef100_A0A0M9WPG0
contig_1	cds	1605433	1608060	+	ENBDON_01541	1667	0	1	0.984	0.959	UniRef:UniRef90_A0A385HK57
contig_1	cds	1608057	1608758	+	ENBDON_01542	-	0	1	1	1	UniRef:UniRef100_UPI0025A23939
contig_1	cds	1608888	1609211	+	ENBDON_01543	-	0	1	1	1	UniRef:UniRef100_A0A098BVI3
contig_1	cds	1609226	1610332	+	ENBDON_01544	713	2.7e-259	1	0.987	0.984	UniRef:UniRef90_A0A098BWY5
contig_1	cds	1610445	1612085	+	ENBDON_01545	1077	0	1	1	0.974	UniRef:UniRef90_A0A098BVL9
contig_1	cds	1612091	1613101	+	ENBDON_01546	611	5.1e-220	0.997	0.988	0.952	UniRef:UniRef90_A0A098BU49
contig_1	cds	1613178	1613849	+	ENBDON_01547	337	1.8e-115	1.04	0.991	0.858	UniRef:UniRef90_A0A098BU44
contig_1	cds	1613855	1615273	+	ENBDON_01548	918	0	1	0.994	0.979	UniRef:UniRef90_N1M035
contig_1	cds	1615403	1616668	+	ENBDON_01549	-	0	1	1	1	UniRef:UniRef100_UPI0025A24564
contig_1	cds	1616747	1618372	+	ENBDON_01550	899	0	1.002	1.002	0.878	UniRef:UniRef90_A0A098BVM5
contig_1	cds	1618394	1619776	-	ENBDON_01551	832	6.1e-303	0.996	0.962	0.972	UniRef:UniRef90_A0A098BU54
contig_1	cds	1619793	1620746	-	ENBDON_01552	-	0	1	1	1	UniRef:UniRef100_A0A0M9WPG3
contig_1	cds	1620820	1621896	+	ENBDON_01553	-	0	1	1	1	UniRef:UniRef100_A0A0M8PP40
contig_1	cds	1621952	1622758	+	ENBDON_01554	-	0	1	1	1	UniRef:UniRef100_A0A0M9WPF7
contig_1	cds	1622752	1623339	+	ENBDON_01555	-	0	1	1	1	UniRef:UniRef100_M2YTL5
contig_1	cds	1623409	1625181	+	ENBDON_01556	1146	0	1	0.972	0.978	UniRef:UniRef90_A0A059MTT5
contig_1	cds	1625304	1626185	+	ENBDON_01557	-	0	1	1	1	UniRef:UniRef100_M2ZDD2
contig_1	cds	1626182	1627129	+	ENBDON_01558	592	3.8e-213	0.997	0.997	1	UniRef:UniRef90_A0A098BX68
contig_1	cds	1627168	1627581	+	ENBDON_01559	205	3.8e-66	1	1	0.985	UniRef:UniRef90_A0A0M8PHW5
contig_1	cds	1627584	1628207	+	ENBDON_01560	389	2e-136	1	1	0.942	UniRef:UniRef90_A0A098BUD4
contig_1	cds	1628304	1628471	+	ENBDON_01561	-	0	1	1	1	UniRef:UniRef100_C1AZK8
contig_1	cds	1628584	1629432	+	ENBDON_01562	508	5.5e-181	0.996	0.986	0.922	UniRef:UniRef90_A0A098BVR4
contig_1	cds	1629452	1630612	-	ENBDON_01563	742	2.9e-270	1	0.987	0.966	UniRef:UniRef90_A0A059MTU0
contig_1	cds	1630733	1631929	+	ENBDON_01564	-	0	1	1	1	UniRef:UniRef100_A0A098BVV2
contig_1	cds	1631991	1632668	-	ENBDON_01565	432	3.3e-153	1	1	0.982	UniRef:UniRef90_A0A098BUD8
contig_1	cds	1632866	1633492	+	ENBDON_01566	-	0	1	1	1	UniRef:UniRef100_M2XWF2
contig_1	cds	1633509	1633862	+	ENBDON_01567	-	0	1	1	1	UniRef:UniRef100_A0A0M8PPW0
contig_1	cds	1634026	1635549	+	ENBDON_01568	868	0	1.014	1	0.93	UniRef:UniRef90_A0A098BX78
contig_1	cds	1635634	1636014	+	ENBDON_01569	-	0	1	1	1	UniRef:UniRef100_UPI0025A2E5F3
contig_1	cds	1636090	1637223	-	ENBDON_01570	-	0	1	1	1	UniRef:UniRef100_A0A098BUE2
contig_1	cds	1637249	1638127	-	ENBDON_01571	516	6.9e-184	1.003	1	0.952	UniRef:UniRef90_M2XWF7
contig_1	cds	1638287	1639285	-	ENBDON_01572	498	3.7e-175	1.036	0.986	0.884	UniRef:UniRef90_A0A0M8PHG4
contig_1	cds	1639374	1639901	-	ENBDON_01573	-	0	1	1	1	UniRef:UniRef100_M2ZX50
contig_1	cds	1639894	1641168	-	ENBDON_01574	-	0	1	1	1	UniRef:UniRef100_A0A0M8PP29
contig_1	cds	1641227	1642183	+	ENBDON_01575	-	0	1	1	1	UniRef:UniRef100_M2YTN4
contig_1	cds	1642307	1642795	+	ENBDON_01576	-	0	1	1	1	UniRef:UniRef100_A0A385HK83
contig_1	cds	1642917	1644266	+	ENBDON_01577	864	0	1	0.991	0.976	UniRef:UniRef90_A0A098BVX9
contig_1	cds	1644263	1645228	+	ENBDON_01578	585	3.3e-210	1	1	0.956	UniRef:UniRef90_A0A059MT19
contig_1	cds	1645228	1646064	+	ENBDON_01579	-	0	1	1	1	UniRef:UniRef100_A0A0M8PQR2
contig_1	cds	1646070	1647239	+	ENBDON_01580	752	5.2e-274	1	0.992	0.979	UniRef:UniRef90_A0A2D2A5X5
contig_1	cds	1647247	1648083	+	ENBDON_01581	-	-	-	-	-	-
contig_1	cds	1648142	1649650	-	ENBDON_01582	874	0	1	1	0.964	UniRef:UniRef90_A0A385HKG0
contig_1	cds	1649774	1650880	+	ENBDON_01583	701	8.4e-255	1	1	0.973	UniRef:UniRef90_A0A098BUH2
contig_1	cds	1650965	1651501	+	ENBDON_01584	337	1.2e-116	1	0.894	0.972	UniRef:UniRef90_A0A098BUF4
contig_1	cds	1651620	1653317	-	ENBDON_01585	1010	0	1.004	1	0.931	UniRef:UniRef90_A0A385HKU1
contig_1	cds	1653501	1654346	-	ENBDON_01586	-	0	1	1	1	UniRef:UniRef100_A0A0M8PHF8
contig_1	cds	1654390	1655028	+	ENBDON_01587	412	3.5e-145	1	0.934	0.986	UniRef:UniRef90_M2ZDG1
contig_1	cds	1655038	1656849	-	ENBDON_01588	1110	0	1	1	0.94	UniRef:UniRef90_M2ZX64
contig_1	cds	1656840	1657907	-	ENBDON_01589	671	2.4e-243	1	1	0.952	UniRef:UniRef90_A0A098BUF9
contig_1	cds	1658020	1658874	+	ENBDON_01590	512	1.2e-182	1	1	0.94	UniRef:UniRef90_A0A098BVV9
contig_1	cds	1658871	1659293	+	ENBDON_01591	-	0	1	1	1	UniRef:UniRef100_M2XWH4
contig_1	cds	1659738	1660931	+	ENBDON_01592	-	0	1	1	1	UniRef:UniRef100_UPI0025A20EB8
contig_1	cds	1661011	1661970	+	ENBDON_01593	593	1.8e-213	1	1	0.987	UniRef:UniRef90_A0A2D2A3Z5
contig_1	cds	1661929	1662846	-	ENBDON_01594	549	1.4e-196	0.993	0.993	0.924	UniRef:UniRef90_A0A098BUG5
contig_1	cds	1662857	1663684	-	ENBDON_01595	-	0	1	1	1	UniRef:UniRef100_UPI0025A275AF
contig_1	cds	1663681	1665264	-	ENBDON_01596	1042	0	1	1	0.975	UniRef:UniRef90_N1M4X5
contig_1	cds	1665335	1666003	+	ENBDON_01597	-	0	1	1	1	UniRef:UniRef100_UPI0005931D52
contig_1	cds	1666086	1669883	-	ENBDON_01598	-	0	1	1	1	UniRef:UniRef100_A0A0M8PHF2
contig_1	cds	1669991	1673803	-	ENBDON_01599	2246	0	1	1	0.987	UniRef:UniRef90_A0A098BUG8
contig_1	cds	1673958	1674743	-	ENBDON_01600	421	6.9e-147	1	0.85	0.904	UniRef:UniRef90_A0A098BXC9
contig_1	cds	1674740	1675807	-	ENBDON_01601	630	5e-227	1.037	1.005	0.916	UniRef:UniRef90_A0A0M9WPF9
contig_1	cds	1675848	1676687	-	ENBDON_01602	-	0	1	1	1	UniRef:UniRef100_A0A0N0S0Y7
contig_1	cds	1676689	1677438	-	ENBDON_01603	-	0	1	1	1	UniRef:UniRef100_A0A0M8PPU6
contig_1	cds	1677483	1678409	+	ENBDON_01604	559	5.9e-201	0.925	1	0.982	UniRef:UniRef90_M2ZYD0
contig_1	cds	1678406	1678807	+	ENBDON_01605	256	3e-86	1	1	0.917	UniRef:UniRef90_A0A098BXD4
contig_1	cds	1678809	1679831	-	ENBDON_01606	-	0	1	1	1	UniRef:UniRef100_M2XWI8
contig_1	cds	1679849	1680550	-	ENBDON_01607	412	3e-144	1.137	0.936	0.834	UniRef:UniRef90_A0A098BUJ7
contig_1	cds	1680589	1682067	+	ENBDON_01608	920	0	1	1	0.959	UniRef:UniRef90_A0A098BUI0
contig_1	cds	1682078	1682875	+	ENBDON_01609	489	3.1e-174	1	0.989	0.947	UniRef:UniRef90_A0A5M3YFR7
contig_1	cds	1682942	1683997	+	ENBDON_01610	682	9.5e-248	1	0.972	0.972	UniRef:UniRef90_N1M674
contig_1	cds	1684095	1684856	+	ENBDON_01611	463	1.8e-164	1	1	0.968	UniRef:UniRef90_A0A098BW17
contig_1	cds	1684886	1685809	+	ENBDON_01612	545	7.9e-195	0.997	0.997	0.915	UniRef:UniRef90_A0A098BUK1
contig_1	cds	1685831	1687156	-	ENBDON_01613	815	2.7e-297	1	1	0.923	UniRef:UniRef90_A0A098BVY6
contig_1	cds	1687234	1687878	+	ENBDON_01614	387	2e-135	1	1	0.935	UniRef:UniRef90_A0A2D2A414
contig_1	cds	1687949	1689124	+	ENBDON_01615	708	2.2e-256	1	0.965	0.939	UniRef:UniRef90_A0A098BW22
contig_1	cds	1689126	1690490	-	ENBDON_01616	832	1.1e-303	0.996	0.991	0.923	UniRef:UniRef90_M2XWJ7
contig_1	cds	1690508	1691152	+	ENBDON_01617	399	2.6e-140	0.995	0.995	0.92	UniRef:UniRef90_A0A098BXF1
contig_1	cds	1691210	1693012	-	ENBDON_01618	1160	0	1	0.979	0.987	UniRef:UniRef90_A0A098BW27
contig_1	cds	1693169	1693798	-	ENBDON_01619	-	0	1	1	1	UniRef:UniRef100_A0A0M8PDQ6
contig_1	cds	1693861	1694292	-	ENBDON_01620	-	0	1	1	1	UniRef:UniRef100_M2YTS6
contig_1	cds	1694419	1695693	-	ENBDON_01621	806	1.6e-294	1	1	0.967	UniRef:UniRef90_A0A098BXF5
contig_1	cds	1695847	1696386	+	ENBDON_01622	299	8.1e-102	1	0.942	0.894	UniRef:UniRef90_A0A098BW32
contig_1	cds	1696383	1697423	+	ENBDON_01623	621	7.6e-224	1	1	0.942	UniRef:UniRef90_A0A385HL38
contig_1	cds	1697494	1699407	+	ENBDON_01624	-	0	1	1	1	UniRef:UniRef100_UPI0025A22E94
contig_1	cds	1699454	1700257	-	ENBDON_01625	-	0	1	1	1	UniRef:UniRef100_M2ZDL3
contig_1	cds	1700367	1700882	-	ENBDON_01626	-	0	1	1	1	UniRef:UniRef100_UPI0025A01568
contig_1	cds	1700879	1702780	-	ENBDON_01627	-	0	1	1	1	UniRef:UniRef100_UPI0025A13AF7
contig_1	cds	1702980	1703441	+	ENBDON_01628	-	0	1	1	1	UniRef:UniRef100_UPI0025A2E5D5
contig_1	cds	1703451	1704059	-	ENBDON_01629	-	0	1	1	1	UniRef:UniRef100_M2XWM1
contig_1	cds	1704107	1704877	-	ENBDON_01630	506	9.2e-181	0.996	0.853	0.969	UniRef:UniRef90_A0A098BW07
contig_1	cds	1704999	1705763	+	ENBDON_01631	493	5.2e-176	1	0.996	0.992	UniRef:UniRef90_A0A098BXG8
contig_1	cds	1705776	1708298	+	ENBDON_01632	1394	0	1	1	0.945	UniRef:UniRef90_A0A8D4FTV0
contig_1	cds	1708481	1710064	+	ENBDON_01633	984	0	1	1	0.979	UniRef:UniRef90_A0A098BUM7
contig_1	cds	1710061	1710540	+	ENBDON_01634	289	1.7e-98	0.987	0.975	0.924	UniRef:UniRef90_A0A098BUL0
contig_1	cds	1710663	1711649	+	ENBDON_01635	512	2.4e-181	1	1	0.875	UniRef:UniRef90_M2ZDM1
contig_1	cds	1711674	1712651	-	ENBDON_01636	603	3.1e-217	1	1	0.991	UniRef:UniRef90_A0A385HKC8
contig_1	cds	1712633	1713586	-	ENBDON_01637	568	1.5e-203	0.956	0.941	0.97	UniRef:UniRef90_A0A098BW48
contig_1	cds	1713583	1714809	-	ENBDON_01638	-	0	1	1	1	UniRef:UniRef100_M2YTW4
contig_1	cds	1715126	1715317	+	ENBDON_01639	-	0	1	1	1	UniRef:UniRef100_M2XWM9
contig_1	cds	1715479	1715721	+	ENBDON_01640	145	7.2e-44	1	0.889	0.938	UniRef:UniRef90_A0A385HKG6
contig_1	cds	1715718	1716962	+	ENBDON_01641	788	1.8e-287	1	0.97	0.952	UniRef:UniRef90_N1MDJ5
contig_1	cds	1717068	1719152	+	ENBDON_01642	1258	0	1	1	0.935	UniRef:UniRef90_A0A098BW53
contig_1	cds	1719157	1720812	+	ENBDON_01643	1087	0	1	1	0.962	UniRef:UniRef90_A0A098BUN8
contig_1	cds	1720809	1721432	+	ENBDON_01644	384	9.4e-135	1	1	0.937	UniRef:UniRef90_A0A098BUL9
contig_1	cds	1721445	1722440	+	ENBDON_01645	497	2.7e-175	1	1	0.927	UniRef:UniRef90_M2ZDN0
contig_1	cds	1722475	1723398	+	ENBDON_01646	-	0	1	1	1	UniRef:UniRef100_UPI0025A0A56E
contig_1	cds	1723720	1724907	+	ENBDON_01647	742	5e-270	0.995	0.992	0.941	UniRef:UniRef90_N1MAF6
contig_1	cds	1724904	1726157	+	ENBDON_01648	799	7.4e-292	1	1	0.95	UniRef:UniRef90_A0A098BUP1
contig_1	cds	1726154	1727335	+	ENBDON_01649	776	1.6e-283	1	1	0.98	UniRef:UniRef90_N1M599
contig_1	cds	1727407	1728546	+	ENBDON_01650	746	5.9e-272	0.995	0.995	0.973	UniRef:UniRef90_A0A098BW28
contig_1	cds	1728841	1730301	+	ENBDON_01651	906	0	1	1	0.967	UniRef:UniRef90_N1MB65
contig_1	cds	1730353	1731678	+	ENBDON_01652	782	2.4e-284	1	1	0.939	UniRef:UniRef90_A0A098BW64
contig_1	cds	1731903	1732838	+	ENBDON_01653	-	0	1	1	1	UniRef:UniRef100_A0A0M9WLM7
contig_1	cds	1732973	1734313	+	ENBDON_01654	800	3.5e-291	1	1	0.955	UniRef:UniRef90_A0A098BW34
contig_1	cds	1734317	1736233	+	ENBDON_01655	1155	0	1.067	1	0.888	UniRef:UniRef90_A0A098BXJ0
contig_1	cds	1736320	1737339	-	ENBDON_01656	664	7.6e-241	1	1	0.971	UniRef:UniRef90_M2ZXE3
contig_1	sorf	1737452	1737535	-	ENBDON_01657	46.2	8.9e-11	1	1	0.963	UniRef:UniRef90_A0A098BUQ1
contig_1	cds	1737777	1738307	-	ENBDON_01658	346	1.1e-120	0.989	0.989	0.989	UniRef:UniRef90_A0A0M8PC22
contig_1	cds	1738365	1739213	-	ENBDON_01659	555	2.6e-199	0.986	0.921	0.968	UniRef:UniRef90_M2YTY6
contig_1	cds	1739210	1739731	-	ENBDON_01660	343	1e-119	1	1	0.983	UniRef:UniRef90_UPI0007CD7B37
contig_1	cds	1739810	1740463	-	ENBDON_01661	418	2.6e-147	1	0.865	0.982	UniRef:UniRef90_N1M6T6
contig_1	cds	1740624	1741331	+	ENBDON_01662	432	7.1e-153	1	1	0.932	UniRef:UniRef90_A0A059MU27
contig_1	cds	1741420	1742067	+	ENBDON_01663	446	4.9e-159	1	1	0.972	UniRef:UniRef90_A0A098BUN7
contig_1	cds	1742078	1743283	-	ENBDON_01664	735	4.2e-267	1	1	0.945	UniRef:UniRef90_A0A842H4Z3
contig_1	cds	1743392	1744588	-	ENBDON_01665	810	9.1e-297	1	1	0.982	UniRef:UniRef90_A0A098BXK2
contig_1	cds	1744626	1745876	-	ENBDON_01666	748	1.3e-271	1.002	1	0.945	UniRef:UniRef90_A0A098BW78
contig_1	cds	1745925	1746767	+	ENBDON_01667	-	0	1	1	1	UniRef:UniRef100_M2ZXF1
contig_1	cds	1746892	1747962	+	ENBDON_01668	696	3.8e-253	1.014	1	0.914	UniRef:UniRef90_A0A2X4X0N6
contig_1	cds	1747969	1748790	+	ENBDON_01669	527	4.2e-189	1	1	0.963	UniRef:UniRef90_A0A098BUP2
contig_1	cds	1748801	1749517	+	ENBDON_01670	-	0	1	1	1	UniRef:UniRef100_UPI00111CE99B
contig_1	cds	1749573	1750325	-	ENBDON_01671	464	7.1e-165	1	1	0.996	UniRef:UniRef90_A0A0M9WLB7
contig_1	cds	1750322	1751251	-	ENBDON_01672	602	1.8e-217	1	1	0.99	UniRef:UniRef90_A0A0M8PIB3
contig_1	cds	1751384	1751761	+	ENBDON_01673	229	5.5e-76	1	1	0.928	UniRef:UniRef90_A0A0M9WLB4
contig_1	cds	1751930	1752706	+	ENBDON_01674	518	5.9e-186	1	1	0.988	UniRef:UniRef90_A0A0M9WLC1
contig_1	cds	1752792	1754657	-	ENBDON_01675	-	0	1	1	1	UniRef:UniRef100_M2ZXG0
contig_1	cds	1754708	1755541	-	ENBDON_01676	-	0	1	1	1	UniRef:UniRef100_A0A0M8PCD4
contig_1	cds	1756428	1761911	-	ENBDON_01677	3440	0	1.005	0.998	0.968	UniRef:UniRef90_A0A098BW62
contig_1	cds	1762715	1763167	+	ENBDON_01678	295	4.2e-101	1	1	0.92	UniRef:UniRef90_A0A098BW91
contig_1	cds	1763221	1765068	+	ENBDON_01679	1119	0	1.003	1	0.911	UniRef:UniRef90_A0A5M3Y4A0
contig_1	cds	1765139	1766317	+	ENBDON_01680	686	4.7e-248	1	1	0.957	UniRef:UniRef90_A0A098BUQ9
contig_1	cds	1766475	1766933	+	ENBDON_01681	258	9.5e-87	0.888	0.906	0.97	UniRef:UniRef90_M2ZYM7
contig_1	cds	1767766	1768818	+	ENBDON_01682	688	3.1e-250	1	1	0.991	UniRef:UniRef90_A0A098BXM2
contig_1	cds	1768818	1769450	+	ENBDON_01683	-	0	1	1	1	UniRef:UniRef100_M2ZDR6
contig_1	cds	1769460	1770620	-	ENBDON_01684	730	4.1e-265	1	0.946	0.959	UniRef:UniRef90_N1MCQ9
contig_1	cds	1770768	1771436	+	ENBDON_01685	394	4.6e-138	1	1	0.923	UniRef:UniRef90_A0A098BUS0
contig_1	cds	1771458	1772432	-	ENBDON_01686	570	2.8e-204	1.006	1	0.896	UniRef:UniRef90_A0A842H568
contig_1	cds	1772509	1774044	-	ENBDON_01687	975	0	1	1	0.977	UniRef:UniRef90_A0A098BXN3
contig_1	cds	1774159	1775016	+	ENBDON_01688	-	0	1	1	1	UniRef:UniRef100_M2ZXH5
contig_1	cds	1775013	1775498	+	ENBDON_01689	296	1.7e-101	1	1	0.981	UniRef:UniRef90_M2ZYN8
contig_1	cds	1775526	1775684	-	ENBDON_01690	-	0	1	1	1	UniRef:UniRef100_A0A098BWA5
contig_1	cds	1775880	1776629	+	ENBDON_01691	467	1e-165	1	0.936	0.98	UniRef:UniRef90_A0A098BUT7
contig_1	cds	1776685	1777602	+	ENBDON_01692	539	1.3e-192	0.987	0.987	0.957	UniRef:UniRef90_A0A098BUS6
contig_1	cds	1777694	1778863	+	ENBDON_01693	-	0	1	1	1	UniRef:UniRef100_A0A0M8PHX7
contig_1	cds	1778906	1779322	-	ENBDON_01694	263	3.9e-89	1	1	0.928	UniRef:UniRef90_A0A098BW82
contig_1	cds	1779524	1780315	+	ENBDON_01695	524	4.5e-188	1	1	0.989	UniRef:UniRef90_A0A0M8PGL5
contig_1	cds	1780448	1781368	+	ENBDON_01696	582	1.7e-209	1	1	0.941	UniRef:UniRef90_A0A098BUU1
contig_1	cds	1781421	1782362	+	ENBDON_01697	617	2e-223	1	1	0.968	UniRef:UniRef90_M2XWT9
contig_1	cds	1782434	1783924	-	ENBDON_01698	990	0	1	1	0.988	UniRef:UniRef90_A0A098BXR2
contig_1	cds	1784296	1785447	-	ENBDON_01699	731	4.8e-266	1	1.003	0.961	UniRef:UniRef90_M2ZXI5
contig_1	cds	1785444	1788743	-	ENBDON_01700	1989	0	1.003	1	0.967	UniRef:UniRef90_A0A098BWD3
contig_1	cds	1788740	1789333	-	ENBDON_01701	-	0	1	1	1	UniRef:UniRef100_M2YU31
contig_1	cds	1789330	1790811	-	ENBDON_01702	901	0	1	0.978	0.98	UniRef:UniRef90_A0A098BUW2
contig_1	cds	1790956	1791588	-	ENBDON_01703	360	7.5e-125	1	0.942	0.881	UniRef:UniRef90_A0A098BWB9
contig_1	cds	1791585	1791917	-	ENBDON_01704	201	2.5e-65	1	1	0.927	UniRef:UniRef90_A0A098BXS3
contig_1	cds	1792110	1792901	-	ENBDON_01705	499	3.7e-178	1	1	0.962	UniRef:UniRef90_A0A059MTD5
contig_1	cds	1792901	1794166	-	ENBDON_01706	841	2.5e-308	1	1	0.993	UniRef:UniRef90_A0A0M8PN88
contig_1	cds	1794405	1795307	+	ENBDON_01707	543	6e-194	1	0.932	0.943	UniRef:UniRef90_A0A6N7C5S0
contig_1	cds	1795327	1796184	-	ENBDON_01708	546	5.1e-196	1	1	0.982	UniRef:UniRef90_A0A5M3Y4L5
contig_1	cds	1796181	1797317	-	ENBDON_01709	716	3e-260	1	1	0.997	UniRef:UniRef90_A0A5M3Y4H8
contig_1	cds	1797500	1798894	-	ENBDON_01710	721	1.7e-258	1	0.88	0.881	UniRef:UniRef90_A0A6N7C3V8
contig_1	cds	1800065	1800940	+	ENBDON_01711	534	3e-191	1	1	0.966	UniRef:UniRef90_A0A0M9WP06
contig_1	cds	1801176	1801475	+	ENBDON_01712	191	1.5e-61	1	1	0.97	UniRef:UniRef90_A0A0M8PPX4
contig_1	cds	1801612	1802223	+	ENBDON_01713	366	1e-127	1	1	0.961	UniRef:UniRef90_A0A0M8PP33
contig_1	cds	1802617	1804398	-	ENBDON_01714	1085	0	1	1	0.931	UniRef:UniRef90_A0A0N0S0V3
contig_1	cds	1804466	1805296	-	ENBDON_01715	471	9.3e-167	1	1	0.884	UniRef:UniRef90_A0A385HKL7
contig_1	cds	1805491	1806402	-	ENBDON_01716	582	1.9e-209	0.993	0.938	0.967	UniRef:UniRef90_UPI001E28681A
contig_1	cds	1806537	1808378	+	ENBDON_01717	1114	0	1.003	0.976	0.938	UniRef:UniRef90_A0A5M3Y6S8
contig_1	cds	1808799	1810334	-	ENBDON_01718	776	1.6e-279	1	1.012	0.869	UniRef:UniRef90_UPI001386DE63
contig_1	cds	1811168	1811434	+	ENBDON_01719	158	1.1e-48	0.989	0.821	0.931	UniRef:UniRef90_A0A6H1BYR9
contig_1	cds	1811431	1811775	+	ENBDON_01720	-	-	-	-	-	-
contig_1	cds	1812058	1814175	+	ENBDON_01721	-	-	-	-	-	-
contig_1	cds	1814221	1817790	+	ENBDON_01722	2306	0	1	1	0.995	UniRef:UniRef90_A0A5M3Y4J4
contig_1	cds	1817792	1820527	+	ENBDON_01723	1684	0	1	1	0.964	UniRef:UniRef90_A0A5M3Y8H1
contig_1	cds	1820542	1822554	+	ENBDON_01724	1295	0	1.001	1	0.979	UniRef:UniRef90_A0A5M3Y6J4
contig_1	cds	1822551	1825316	+	ENBDON_01725	1750	0	1	1	0.951	UniRef:UniRef90_A0A5M3Y4K8
contig_1	cds	1825363	1826382	+	ENBDON_01726	606	5.5e-218	1	1	0.965	UniRef:UniRef90_A0A5M3Y7F5
contig_1	cds	1826379	1827542	+	ENBDON_01727	759	5.1e-277	0.997	0.997	0.964	UniRef:UniRef90_A0A5M3Y4J6
contig_1	cds	1827689	1828228	+	ENBDON_01728	204	3.1e-64	1	1	0.95	UniRef:UniRef90_A0A6H1BZ93
contig_1	cds	1828421	1830220	-	ENBDON_01729	1125	0	0.995	0.954	0.93	UniRef:UniRef90_A0A059MIG2
contig_1	cds	1830519	1832174	-	ENBDON_01730	1030	0	0.985	0.982	0.941	UniRef:UniRef90_UPI001980AA5E
contig_1	cds	1832569	1833021	+	ENBDON_01731	-	-	-	-	-	-
contig_1	cds	1833378	1833674	+	ENBDON_01732	144	5.5e-43	1	1	0.643	UniRef:UniRef90_UPI0008320F38
contig_1	cds	1833706	1834326	-	ENBDON_01733	328	1.1e-112	1	1	0.898	UniRef:UniRef90_A0A6H1BY45
contig_1	cds	1834857	1835909	+	ENBDON_01734	668	2.7e-242	1	1	0.971	UniRef:UniRef90_A0A385HKU4
contig_1	cds	1836037	1837122	+	ENBDON_01735	704	2.9e-256	1	1	0.994	UniRef:UniRef90_K6WBV0
contig_1	cds	1837196	1838164	+	ENBDON_01736	622	1.3e-224	1	0.939	0.966	UniRef:UniRef90_N1MDR3
contig_1	cds	1838161	1839813	+	ENBDON_01737	939	0	1.009	1	0.897	UniRef:UniRef90_N1MEG2
contig_1	cds	1839806	1841293	+	ENBDON_01738	848	0	1.004	1	0.964	UniRef:UniRef90_N1MA27
contig_1	cds	1841290	1841928	+	ENBDON_01739	395	2.1e-138	0.991	0.909	0.943	UniRef:UniRef90_N1M8V0
contig_1	cds	1842120	1843298	+	ENBDON_01740	744	9.3e-271	1	1	0.967	UniRef:UniRef90_N1MA10
contig_1	cds	1843285	1844823	+	ENBDON_01741	967	0	1	1	0.973	UniRef:UniRef90_A0A385HKU0
contig_1	cds	1844823	1845854	+	ENBDON_01742	585	8.9e-210	1	1	0.98	UniRef:UniRef90_A0A098BUZ0
contig_1	cds	1845879	1846382	+	ENBDON_01743	-	0	1	1	1	UniRef:UniRef100_UPI00111F3A1F
contig_1	cds	1846379	1846858	+	ENBDON_01744	288	5e-98	0.975	0.963	0.923	UniRef:UniRef90_A0A5M3Y6L2
contig_1	cds	1846855	1848141	+	ENBDON_01745	764	5.6e-278	0.949	1	0.968	UniRef:UniRef90_A0A385HKX3
contig_1	cds	1848333	1849211	+	ENBDON_01746	573	9.2e-207	1	1	0.945	UniRef:UniRef90_A0A098BXX2
contig_1	cds	1849359	1849988	-	ENBDON_01747	367	6e-128	1.01	1	0.891	UniRef:UniRef90_A0A0M8PL47
contig_1	cds	1849985	1850317	-	ENBDON_01748	184	1.3e-58	0.982	0.982	0.889	UniRef:UniRef90_A0A0M8PD05
contig_1	cds	1850560	1851840	+	ENBDON_01749	821	4.4e-300	0.998	0.998	0.993	UniRef:UniRef90_M3A188
contig_1	cds	1851911	1853125	+	ENBDON_01750	749	1.2e-272	1	1	0.923	UniRef:UniRef90_M2YWF8
contig_1	cds	1853214	1853894	-	ENBDON_01751	430	4.1e-152	1	1	0.96	UniRef:UniRef90_M2XZJ9
contig_1	cds	1853952	1855100	-	ENBDON_01752	721	6e-262	1	1	0.932	UniRef:UniRef90_A0A059MSK5
contig_1	cds	1855206	1855340	-	ENBDON_01753	-	-	-	-	-	-
contig_1	cds	1855381	1855833	-	ENBDON_01754	285	4.6e-97	1	0.909	0.907	UniRef:UniRef90_A0A098BV32
contig_1	cds	1856033	1856971	+	ENBDON_01755	616	5.8e-223	1	0.99	0.946	UniRef:UniRef90_A0A098BWI5
contig_1	cds	1857068	1857277	+	ENBDON_01756	115	9.9e-33	1	1	0.899	UniRef:UniRef90_A0A098BXY7
contig_1	cds	1857308	1857997	+	ENBDON_01757	442	9.8e-157	1	1	0.952	UniRef:UniRef90_M2YWG4
contig_1	cds	1858009	1860096	-	ENBDON_01758	1301	0	1	1	0.965	UniRef:UniRef90_A0A385HLD2
contig_1	cds	1860246	1861319	+	ENBDON_01759	682	2.7e-247	1	0.981	0.972	UniRef:UniRef90_A0A098BV37
contig_1	cds	1861416	1862840	+	ENBDON_01760	-	0	1	1	1	UniRef:UniRef100_M3A027
contig_1	cds	1862930	1863397	+	ENBDON_01761	-	0	1	1	1	UniRef:UniRef100_A0A0M8PD11
contig_1	cds	1863481	1863777	-	ENBDON_01762	-	0	1	1	1	UniRef:UniRef100_A0A0M8PJE7
contig_1	cds	1864150	1865001	+	ENBDON_01763	-	0	1	1	1	UniRef:UniRef100_M2XZK9
contig_1	cds	1865086	1866300	+	ENBDON_01764	743	7.4e-270	1	0.951	0.968	UniRef:UniRef90_N1M748
contig_1	cds	1866364	1867920	-	ENBDON_01765	1006	0	0.996	0.952	0.969	UniRef:UniRef90_N1MBG0
contig_1	cds	1868036	1869310	-	ENBDON_01766	824	2.3e-301	1	1	0.974	UniRef:UniRef90_A0A385HLL7
contig_1	cds	1869522	1870016	+	ENBDON_01767	313	5.8e-108	1	1	0.951	UniRef:UniRef90_A0A098BV41
contig_1	cds	1870009	1871799	+	ENBDON_01768	-	0	1	1	1	UniRef:UniRef100_UPI0025A26D96
contig_1	cds	1871843	1873957	-	ENBDON_01769	1316	0	0.993	0.983	0.93	UniRef:UniRef90_A0A098BWK2
contig_1	cds	1874018	1874683	-	ENBDON_01770	415	2.5e-146	1	1	0.959	UniRef:UniRef90_A0A098BY02
contig_1	cds	1874680	1876446	-	ENBDON_01771	1024	0	0.998	0.982	0.911	UniRef:UniRef90_A0A059MS46
contig_1	cds	1876603	1878261	+	ENBDON_01772	1016	0	1	0.979	0.951	UniRef:UniRef90_A0A098BV46
contig_1	cds	1878617	1879090	+	ENBDON_01773	225	1.4e-73	0.93	0.986	0.76	UniRef:UniRef90_UPI001F0CFC80
contig_1	cds	1879541	1879849	+	ENBDON_01774	150	2.4e-45	0.99	0.835	0.743	UniRef:UniRef90_UPI001C4DDCCB
contig_1	cds	1879940	1880464	+	ENBDON_01775	346	8e-121	0.914	1	0.994	UniRef:UniRef90_UPI0025A1732C
contig_1	cds	1880783	1882165	-	ENBDON_01776	851	0	1	1	0.943	UniRef:UniRef90_A0A098BV53
contig_1	cds	1882317	1883312	-	ENBDON_01777	611	3.1e-220	0.997	0.997	0.942	UniRef:UniRef90_A0A098BWK7
contig_1	cds	1883597	1884979	+	ENBDON_01778	883	0	1	1	0.974	UniRef:UniRef90_A0A098BY06
contig_1	cds	1884985	1885797	-	ENBDON_01779	491	9.2e-175	0.944	0.889	0.98	UniRef:UniRef90_A0A0M8PJU5
contig_1	cds	1885794	1886588	-	ENBDON_01780	464	2.1e-164	1	1	0.928	UniRef:UniRef90_A0A098BV51
contig_1	cds	1886569	1887597	-	ENBDON_01781	-	0	1	1	1	UniRef:UniRef100_UPI0025A011B0
contig_1	cds	1887594	1888313	-	ENBDON_01782	-	0	1	1	1	UniRef:UniRef100_UPI0025A01404
contig_1	ncRNA-region	1888306	1888404	-	-	62.5	1.1e-09	-	-	-	RFAM:RF00059
contig_1	cds	1888517	1890058	+	ENBDON_01783	1046	0	1	0.975	0.988	UniRef:UniRef90_A0A098BY12
contig_1	cds	1890162	1890917	+	ENBDON_01784	445	2.3e-157	1	0.996	0.956	UniRef:UniRef90_A0A098BV56
contig_1	cds	1890914	1891585	+	ENBDON_01785	437	5.9e-155	1	1	0.955	UniRef:UniRef90_M2XZN7
contig_1	cds	1891709	1891918	+	ENBDON_01786	144	5e-44	1	1	0.986	UniRef:UniRef90_A0A0M9WM65
contig_1	cds	1892045	1893142	-	ENBDON_01787	648	9e-234	0.986	0.994	0.917	UniRef:UniRef90_A0A6H1BZB5
contig_1	ncRNA-region	1893127	1893184	-	-	44.5	1.2e-08	-	-	-	RFAM:RF01747
contig_1	cds	1893197	1894123	-	ENBDON_01788	635	9.4e-231	1	0.997	0.968	UniRef:UniRef90_A0A059MQ71
contig_1	cds	1894123	1895226	-	ENBDON_01789	694	7.9e-252	1	0.981	0.981	UniRef:UniRef90_N1MCX9
contig_1	cds	1895350	1895718	+	ENBDON_01790	-	-	-	-	-	-
contig_1	cds	1895658	1896698	+	ENBDON_01791	-	-	-	-	-	-
contig_1	cds	1896695	1897642	+	ENBDON_01792	-	0	1	1	1	UniRef:UniRef100_A0A0M8PDG8
contig_1	cds	1897645	1898469	+	ENBDON_01793	-	0	1	1	1	UniRef:UniRef100_A0A0M9WM55
contig_1	cds	1898518	1900167	+	ENBDON_01794	1081	0	1	1	0.938	UniRef:UniRef90_A0A059MQ76
contig_1	cds	1900245	1900892	-	ENBDON_01795	369	6.5e-128	0.944	0.86	0.966	UniRef:UniRef90_M2YWK7
contig_1	cds	1901244	1902473	+	ENBDON_01796	696	1.1e-251	0.919	1	0.963	UniRef:UniRef90_A0A0M9WM51
contig_1	cds	1902491	1905325	+	ENBDON_01797	1702	0	1	1	0.954	UniRef:UniRef90_M2ZGB8
contig_1	cds	1905326	1906315	-	ENBDON_01798	-	0	1	1	1	UniRef:UniRef100_M3A066
contig_1	cds	1906483	1906761	-	ENBDON_01799	-	0	1	1	1	UniRef:UniRef100_A0A0M9WM60
contig_1	cds	1906924	1907445	-	ENBDON_01800	304	5.2e-104	1	1	0.919	UniRef:UniRef90_A0A059MSC7
contig_1	cds	1907574	1907891	+	ENBDON_01801	-	0	1	1	1	UniRef:UniRef100_A0A0M8PG01
contig_1	cds	1907908	1908531	-	ENBDON_01802	-	0	1	1	1	UniRef:UniRef100_A0A0M8PDH4
contig_1	cds	1908543	1909415	-	ENBDON_01803	567	2.2e-204	1	1	0.993	UniRef:UniRef90_A0A098BV73
contig_1	cds	1909412	1909840	-	ENBDON_01804	268	8.8e-91	1	0.973	0.958	UniRef:UniRef90_M3A1E9
contig_1	cds	1909857	1910570	-	ENBDON_01805	489	4.5e-175	1	0.926	0.992	UniRef:UniRef90_A0A385HL39
contig_1	cds	1910632	1910802	-	ENBDON_01806	-	0	1	1	1	UniRef:UniRef100_M2XZQ7
contig_1	cds	1910799	1911164	-	ENBDON_01807	-	0	1	1	1	UniRef:UniRef100_M2ZGC6
contig_1	cds	1911409	1912536	+	ENBDON_01808	650	4.9e-234	0.957	0.94	0.972	UniRef:UniRef90_A0A098BV70
contig_1	cds	1912537	1912881	+	ENBDON_01809	-	0	1	1	1	UniRef:UniRef100_UPI0025A2E8B9
contig_1	cds	1912878	1914308	+	ENBDON_01810	815	2.9e-296	1	1	0.964	UniRef:UniRef90_A0A098BWN2
contig_1	cds	1914468	1915091	+	ENBDON_01811	361	1.6e-125	0.903	0.878	0.963	UniRef:UniRef90_A0A098BY34
contig_1	cds	1915088	1916233	-	ENBDON_01812	674	2.4e-243	1	0.969	0.966	UniRef:UniRef90_N1M6C3
contig_1	cds	1916291	1917568	-	ENBDON_01813	790	8.9e-288	1	1	0.993	UniRef:UniRef90_A0A098BV75
contig_1	cds	1917579	1918562	-	ENBDON_01814	-	0	1	1	1	UniRef:UniRef100_A0A0M8PC45
contig_1	cds	1918559	1919662	-	ENBDON_01815	731	2e-266	1	0.953	0.97	UniRef:UniRef90_A0A098BWN9
contig_1	cds	1919830	1920300	+	ENBDON_01816	-	0	1	1	1	UniRef:UniRef100_A0A0M8PK96
contig_1	cds	1920392	1921564	-	ENBDON_01817	-	0	1	1	1	UniRef:UniRef100_UPI0025A042A0
contig_1	cds	1921658	1922134	-	ENBDON_01818	311	2.1e-107	1	1	0.975	UniRef:UniRef90_A0A098BV80
contig_1	cds	1922131	1923318	-	ENBDON_01819	645	1.5e-231	0.99	0.949	0.923	UniRef:UniRef90_A0A385HL67
contig_1	cds	1923398	1924234	+	ENBDON_01820	548	3.6e-197	1	1	0.96	UniRef:UniRef90_A0A098BWP3
contig_1	cds	1924245	1925108	-	ENBDON_01821	521	3.3e-186	0.965	1	0.968	UniRef:UniRef90_A0A098BY44
contig_1	cds	1925116	1925607	-	ENBDON_01822	232	8.4e-76	1	0.926	0.626	UniRef:UniRef90_A0A6G9CWI9
contig_1	cds	1925867	1926193	-	ENBDON_01823	-	0	1	1	1	UniRef:UniRef100_M3A089
contig_1	cds	1926321	1929137	+	ENBDON_01824	1754	0	1	0.945	0.954	UniRef:UniRef90_M3A1G9
contig_1	cds	1929134	1929892	+	ENBDON_01825	469	1.2e-166	1	1	0.925	UniRef:UniRef90_A0A098BWP9
contig_1	cds	1930082	1931593	+	ENBDON_01826	-	0	1	1	1	UniRef:UniRef100_A0A0M8PMB4
contig_1	cds	1931607	1932761	+	ENBDON_01827	-	0	1	1	1	UniRef:UniRef100_A0A0N0S0R3
contig_1	cds	1932758	1933819	+	ENBDON_01828	652	1.2e-235	1	1	0.958	UniRef:UniRef90_A0A098BV90
contig_1	cds	1933821	1934729	+	ENBDON_01829	572	1.2e-205	1	1	0.983	UniRef:UniRef90_A0A098BV99
contig_1	cds	1934726	1935502	+	ENBDON_01830	-	0	1	1	1	UniRef:UniRef100_M2YWP3
contig_1	cds	1935559	1936086	-	ENBDON_01831	-	0	1	1	1	UniRef:UniRef100_A0A0M9WNH8
contig_1	cds	1936221	1936808	+	ENBDON_01832	-	0	1	1	1	UniRef:UniRef100_M2ZGF1
contig_1	cds	1936793	1937941	-	ENBDON_01833	717	9.9e-261	1	1	0.911	UniRef:UniRef90_N1M6F0
contig_1	cds	1938003	1938803	-	ENBDON_01834	474	1.9e-168	1.004	1	0.929	UniRef:UniRef90_N1M7S9
contig_1	cds	1938800	1939966	-	ENBDON_01835	747	4.1e-272	1	1	0.912	UniRef:UniRef90_A0A098BWR0
contig_1	cds	1940050	1940964	+	ENBDON_01836	563	3.2e-202	0.993	0.99	0.974	UniRef:UniRef90_A0A098BY58
contig_1	cds	1941098	1942015	+	ENBDON_01837	580	9.2e-209	1	1	0.941	UniRef:UniRef90_A0A098BWQ8
contig_1	cds	1942015	1943850	+	ENBDON_01838	-	0	1	1	1	UniRef:UniRef100_UPI0025A04130
contig_1	cds	1943847	1944962	+	ENBDON_01839	670	3.3e-242	1	1	0.933	UniRef:UniRef90_A0A098BVA8
contig_1	cds	1945014	1946009	+	ENBDON_01840	671	7.3e-244	1	1	0.976	UniRef:UniRef90_N1MC90
contig_1	cds	1946023	1946403	+	ENBDON_01841	-	0	1	1	1	UniRef:UniRef100_M2XZT9
contig_1	cds	1946550	1947719	+	ENBDON_01842	616	2.4e-220	1.013	0.997	0.906	UniRef:UniRef90_A0A098BVA3
contig_1	tRNA	1947868	1947943	-	ENBDON_01843	84.8	-	-	-	-	-
contig_1	cds	1948184	1950574	+	ENBDON_01844	1608	0	1	0.913	0.948	UniRef:UniRef90_A0A098BY69
contig_1	cds	1950630	1951334	-	ENBDON_01845	424	2.1e-149	1	1	0.923	UniRef:UniRef90_A0A0M9WNG6
contig_1	cds	1951336	1952169	-	ENBDON_01846	519	9e-186	1	1	0.949	UniRef:UniRef90_A0A059MSE0
contig_1	cds	1952350	1954002	+	ENBDON_01847	-	0	1	1	1	UniRef:UniRef100_A0A0M8PIG0
contig_1	cds	1953999	1955420	+	ENBDON_01848	903	0	1	1	0.973	UniRef:UniRef90_A0A059MST4
contig_1	cds	1955417	1956742	+	ENBDON_01849	811	1.3e-295	1	1	0.989	UniRef:UniRef90_A0A098BY78
contig_1	cds	1956739	1957833	+	ENBDON_01850	-	0	1	1	1	UniRef:UniRef100_A0A0M9WNG7
contig_1	cds	1957869	1958798	+	ENBDON_01851	-	0	1	1	1	UniRef:UniRef100_A0A0M8PMA1
contig_1	cds	1959152	1961179	+	ENBDON_01852	1018	0	1	1	0.984	UniRef:UniRef90_A0A0M9WNH1
contig_1	ncRNA-region	1961261	1961306	+	-	58.8	1.1e-09	-	-	-	RFAM:RF03158
contig_1	cds	1961321	1961554	+	ENBDON_01853	-	0	1	1	1	UniRef:UniRef100_A0A0M9WNG8
contig_1	cds	1961664	1962743	+	ENBDON_01854	-	0	1	1	1	UniRef:UniRef100_A0A0M8PN46
contig_1	cds	1962767	1963237	-	ENBDON_01855	291	4.7e-99	1	0.876	0.936	UniRef:UniRef90_M2ZYL8
contig_1	cds	1963330	1964298	+	ENBDON_01856	-	0	1	1	1	UniRef:UniRef100_M2ZER1
contig_1	cds	1964335	1964997	+	ENBDON_01857	418	9.8e-148	1	1	0.973	UniRef:UniRef90_A0A0N0S0Q8
contig_1	cds	1965016	1966221	+	ENBDON_01858	-	0	1	1	1	UniRef:UniRef100_A0A0M8PG00
contig_1	cds	1966233	1966700	+	ENBDON_01859	253	1.3e-84	1	1	0.903	UniRef:UniRef90_A0A098BYB1
contig_1	cds	1966960	1967808	+	ENBDON_01860	-	0	1	1	1	UniRef:UniRef100_A0A385HLQ1
contig_1	cds	1967898	1968149	+	ENBDON_01861	-	0	1	1	1	UniRef:UniRef100_A0A059MSF6
contig_1	cds	1968160	1968720	+	ENBDON_01862	-	0	1	1	1	UniRef:UniRef100_A0A0M8PM95
contig_1	cds	1968726	1969565	+	ENBDON_01863	-	0	1	1	1	UniRef:UniRef100_M2YV02
contig_1	cds	1969630	1971273	+	ENBDON_01864	-	0	1	1	1	UniRef:UniRef100_A0A0M9WNH0
contig_1	cds	1971322	1972305	+	ENBDON_01865	-	0	1	1	1	UniRef:UniRef100_A0A0N0S121
contig_1	cds	1972310	1973761	+	ENBDON_01866	-	0	1	1	1	UniRef:UniRef100_A0A0M8PN40
contig_1	cds	1973768	1974133	+	ENBDON_01867	-	0	1	1	1	UniRef:UniRef100_A0A0M8PNW8
contig_1	cds	1974168	1974602	+	ENBDON_01868	246	4.4e-82	1	1	0.896	UniRef:UniRef90_A0A098BYC3
contig_1	cds	1974621	1975202	-	ENBDON_01869	368	1.2e-128	1	1	0.948	UniRef:UniRef90_A0A2D2A609
contig_1	cds	1975250	1976512	+	ENBDON_01870	799	9.4e-292	1	1	0.974	UniRef:UniRef90_A0A059MSD3
contig_1	rRNA	1977153	1978675	+	ENBDON_01871	1583.1	6.7e-48	-	-	-	RFAM:RF00177
contig_1	rRNA	1978975	1982108	+	ENBDON_01872	2797.5	5.3e-05	-	-	-	RFAM:RF02541
contig_1	rRNA	1982194	1982310	+	ENBDON_01873	89.9	3.6e-14	-	-	-	RFAM:RF00001
contig_1	cds	1982419	1983963	-	ENBDON_01874	944	0	1	1	0.992	UniRef:UniRef90_A0A385HL50
contig_1	cds	1984007	1984681	+	ENBDON_01875	-	0	1	1	1	UniRef:UniRef100_A0A0M8PBC8
contig_1	cds	1985056	1986150	-	ENBDON_01876	468	1.6e-162	1	1	0.992	UniRef:UniRef90_A0A6H1BY38
contig_1	cds	1986258	1986686	-	ENBDON_01877	266	6e-90	1	0.882	0.93	UniRef:UniRef90_A0A2X4U5I6
contig_1	cds	1986846	1988036	+	ENBDON_01878	699	6.2e-253	1	0.975	0.949	UniRef:UniRef90_A0A098BJS5
contig_1	cds	1988133	1988504	+	ENBDON_01879	238	1e-79	1	1	0.959	UniRef:UniRef90_A0A8D4FU41
contig_1	cds	1988601	1989494	+	ENBDON_01880	475	1.9e-167	1	0.943	0.933	UniRef:UniRef90_A0A098BIC1
contig_1	cds	1989600	1991039	-	ENBDON_01881	919	0	1	1	0.965	UniRef:UniRef90_A0A098BJP0
contig_1	cds	1991071	1993269	-	ENBDON_01882	1528	0	1	1	0.974	UniRef:UniRef90_A0A098BL72
contig_1	cds	1993266	1995224	-	ENBDON_01883	1322	0	1	0.959	0.988	UniRef:UniRef90_A0A098BJT1
contig_1	cds	1995632	1998211	+	ENBDON_01884	1665	0	1	1	0.97	UniRef:UniRef90_A0A059MR97
contig_1	cds	1998336	1998800	+	ENBDON_01885	291	9.5e-100	1	1	0.929	UniRef:UniRef90_M2WZS5
contig_1	cds	1999135	1999329	-	ENBDON_01886	-	0	1	1	1	UniRef:UniRef100_M2Z006
contig_1	cds	1999601	2000302	+	ENBDON_01887	-	0	1	1	1	UniRef:UniRef100_M2Z0Y9
contig_1	cds	2000334	2000537	-	ENBDON_01888	139	6e-42	1	1	0.985	UniRef:UniRef90_M2XYL9
contig_1	cds	2000659	2002689	-	ENBDON_01889	1256	0	1	0.97	0.956	UniRef:UniRef90_A0A098BJU3
contig_1	cds	2002715	2003293	-	ENBDON_01890	365	1.4e-127	0.995	0.979	0.953	UniRef:UniRef90_A0A098BID7
contig_1	cds	2003299	2004645	-	ENBDON_01891	858	0	1	1	0.998	UniRef:UniRef90_A0A098BID6
contig_1	cds	2004700	2005077	+	ENBDON_01892	228	1.7e-75	0.992	0.976	0.944	UniRef:UniRef90_A0A098BJQ3
contig_1	cds	2005133	2005711	+	ENBDON_01893	-	0	1	1	1	UniRef:UniRef100_A0A0M8PD90
contig_1	cds	2005708	2006814	+	ENBDON_01894	617	2.1e-221	1	0.968	0.943	UniRef:UniRef90_A0A098BJU9
contig_1	cds	2006820	2006972	-	ENBDON_01895	-	0	1	1	1	UniRef:UniRef100_UPI00034531DA
contig_1	cds	2007128	2007754	+	ENBDON_01896	391	2.6e-137	1	1	0.942	UniRef:UniRef90_M2YWL2
contig_1	cds	2007884	2008639	+	ENBDON_01897	490	4.1e-175	1.004	0.981	0.968	UniRef:UniRef90_A0A098BJQ8
contig_1	cds	2008653	2009441	+	ENBDON_01898	-	0	1	1	1	UniRef:UniRef100_A0A2D1ZS60
contig_1	cds	2009443	2010060	+	ENBDON_01899	378	3.5e-132	0.995	0.981	0.941	UniRef:UniRef90_A0A385HLG0
contig_1	cds	2010160	2010546	-	ENBDON_01900	252	6.9e-85	1	1	0.992	UniRef:UniRef90_A0A098BIE7
contig_1	cds	2010543	2010917	-	ENBDON_01901	235	3.1e-78	1	0.892	0.944	UniRef:UniRef90_M2YWK8
contig_1	tRNA	2011031	2011116	-	ENBDON_01902	72.8	-	-	-	-	-
contig_1	cds	2011131	2011634	-	ENBDON_01903	322	3.2e-111	1	1	0.904	UniRef:UniRef90_UPI0013868E6B
contig_1	cds	2012045	2021299	+	ENBDON_01904	5655	0	1	1	0.97	UniRef:UniRef90_A0A5M3Y2S2
contig_1	cds	2021340	2021741	+	ENBDON_01905	261	3.1e-88	0.992	0.992	0.985	UniRef:UniRef90_A0A098BIF3
contig_1	cds	2021758	2022480	-	ENBDON_01906	-	0	1	1	1	UniRef:UniRef100_M2XU38
contig_1	cds	2022650	2023525	-	ENBDON_01907	585	2.3e-211	1	1	0.973	UniRef:UniRef90_A0A098BLA2
contig_1	cds	2023698	2025047	+	ENBDON_01908	838	3.7e-306	1	1	0.955	UniRef:UniRef90_M2YVJ7
contig_1	cds	2025056	2025532	-	ENBDON_01909	-	0	1	1	1	UniRef:UniRef100_A0A0N0S0L7
contig_1	cds	2025607	2025828	+	ENBDON_01910	-	0	1	1	1	UniRef:UniRef100_A0A098BIF8
contig_1	cds	2026016	2026783	+	ENBDON_01911	480	5.8e-171	1	1	0.941	UniRef:UniRef90_M2XU33
contig_1	cds	2026824	2027660	-	ENBDON_01912	-	0	1	1	1	UniRef:UniRef100_M2YWK1
contig_1	cds	2027922	2029085	+	ENBDON_01913	689	3.1e-249	1	0.992	0.91	UniRef:UniRef90_M2YVJ4
contig_1	cds	2029121	2030074	-	ENBDON_01914	615	1.7e-222	1.006	1	0.953	UniRef:UniRef90_A0A098BIG1
contig_1	tRNA	2030306	2030378	-	ENBDON_01915	78	-	-	-	-	-
contig_1	cds	2030644	2031870	+	ENBDON_01916	804	5.4e-294	0.998	0.998	0.985	UniRef:UniRef90_M2WVA9
contig_1	cds	2032121	2033554	+	ENBDON_01917	-	0	1	1	1	UniRef:UniRef100_UPI00259FF62F
contig_1	tRNA	2033619	2033696	-	ENBDON_01918	71.2	-	-	-	-	-
contig_1	cds	2033780	2034442	-	ENBDON_01919	417	6.3e-147	1	0.944	0.959	UniRef:UniRef90_A0A059MRD4
contig_1	cds	2034463	2036181	+	ENBDON_01920	-	0	1	1	1	UniRef:UniRef100_UPI0025A1AB55
contig_1	cds	2036235	2037038	-	ENBDON_01921	-	0	1	1	1	UniRef:UniRef100_UPI0025A16B76
contig_1	cds	2037065	2039092	-	ENBDON_01922	-	0	1	1	1	UniRef:UniRef100_UPI0025A0A5FE
contig_1	cds	2039089	2039634	-	ENBDON_01923	347	1.1e-120	1	1	0.945	UniRef:UniRef90_A0A098BJT2
contig_1	cds	2039799	2041133	+	ENBDON_01924	815	2.4e-297	1	1	0.966	UniRef:UniRef90_A0A098BLB8
contig_1	cds	2041118	2041939	-	ENBDON_01925	520	2.3e-186	1	1	0.916	UniRef:UniRef90_A0A098BJY1
contig_1	cds	2042035	2042619	+	ENBDON_01926	-	0	1	1	1	UniRef:UniRef100_M2ZTB5
contig_1	cds	2043362	2044807	-	ENBDON_01927	863	0	1	1	0.921	UniRef:UniRef90_V9XJI0
contig_1	cds	2044939	2045808	-	ENBDON_01928	568	8.1e-205	0.976	0.962	0.926	UniRef:UniRef90_M2YPY8
contig_1	cds	2045843	2046250	-	ENBDON_01929	271	3.9e-92	1	1	0.956	UniRef:UniRef90_V9XHH8
contig_1	cds	2046358	2047437	+	ENBDON_01930	664	1.4e-239	1	0.909	0.936	UniRef:UniRef90_V9XHJ6
contig_1	cds	2047757	2048209	-	ENBDON_01931	-	0	1	1	1	UniRef:UniRef100_A0A385HRA8
contig_1	cds	2048206	2048565	-	ENBDON_01932	-	0	1	1	1	UniRef:UniRef100_A0A1J0TQ62
contig_1	cds	2048614	2049531	-	ENBDON_01933	540	8.7e-193	1.007	0.981	0.909	UniRef:UniRef90_M2ZUJ5
contig_1	cds	2049554	2050393	-	ENBDON_01934	-	0	1	1	1	UniRef:UniRef100_A0A0M8PEU7
contig_1	cds	2050417	2051118	-	ENBDON_01935	-	0	1	1	1	UniRef:UniRef100_M2XST5
contig_1	cds	2051214	2052326	+	ENBDON_01936	737	6.5e-269	1	1	0.992	UniRef:UniRef90_A0A0M9WMV4
contig_1	cds	2052353	2053546	+	ENBDON_01937	-	0	1	1	1	UniRef:UniRef100_UPI0025A18349
contig_1	cds	2053560	2053796	+	ENBDON_01938	-	0	1	1	1	UniRef:UniRef100_A0A0M8PHA5
contig_1	cds	2053887	2055230	-	ENBDON_01939	-	0	1	1	1	UniRef:UniRef100_A0A0M8PEU1
contig_1	cds	2055368	2056051	-	ENBDON_01940	-	0	1	1	1	UniRef:UniRef100_M2XSU0
contig_1	cds	2056205	2057863	+	ENBDON_01941	973	0	1	1	0.949	UniRef:UniRef90_A0A2D1ZS94
contig_1	cds	2057860	2059251	+	ENBDON_01942	819	3.7e-298	1	0.991	0.942	UniRef:UniRef90_N1MHB4
contig_1	cds	2059284	2059538	-	ENBDON_01943	142	8.4e-43	1	1	0.976	UniRef:UniRef90_A0A098BJZ5
contig_1	cds	2059723	2062071	+	ENBDON_01944	1337	0	0.991	0.975	0.941	UniRef:UniRef90_A0A5M3Y5M1
contig_1	cds	2062099	2062728	-	ENBDON_01945	402	1.1e-141	1	1	0.947	UniRef:UniRef90_A0A098BIJ0
contig_1	cds	2062715	2063068	-	ENBDON_01946	-	0	1	1	1	UniRef:UniRef100_UPI0025A2A453
contig_1	cds	2063228	2063557	+	ENBDON_01947	-	0	1	1	1	UniRef:UniRef100_M2ZTD9
contig_1	cds	2063554	2066805	-	ENBDON_01948	2087	0	1	1	0.95	UniRef:UniRef90_A0A098BK00
contig_1	cds	2067004	2067171	-	ENBDON_01949	-	0	1	1	1	UniRef:UniRef100_A0A098BIJ5
contig_1	cds	2067276	2067797	+	ENBDON_01950	-	0	1	1	1	UniRef:UniRef100_M2YQ11
contig_1	cds	2067794	2068663	+	ENBDON_01951	542	3.4e-194	1	0.935	0.972	UniRef:UniRef90_A0A098BLE4
contig_1	tRNA	2068760	2068833	-	ENBDON_01952	70	-	-	-	-	-
contig_1	cds	2068993	2069874	+	ENBDON_01953	545	2.7e-195	1	1	0.973	UniRef:UniRef90_A0A059MR94
contig_1	cds	2069879	2070358	+	ENBDON_01954	-	0	1	1	1	UniRef:UniRef100_UPI000743BBFE
contig_1	cds	2070355	2072751	+	ENBDON_01955	1602	0	1	1	0.997	UniRef:UniRef90_A0A098BIK0
contig_1	cds	2072781	2073668	+	ENBDON_01956	538	1.7e-192	1	1	0.953	UniRef:UniRef90_A0A385HLR9
contig_1	cds	2073694	2074563	+	ENBDON_01957	538	7.7e-193	1	1	0.955	UniRef:UniRef90_A0A098BLE9
contig_1	cds	2074560	2075774	+	ENBDON_01958	687	4.5e-248	1.005	1	0.884	UniRef:UniRef90_M2Z9T0
contig_1	cds	2075806	2077839	+	ENBDON_01959	1255	0	0.999	0.999	0.969	UniRef:UniRef90_M2ZTF2
contig_1	cds	2077836	2078618	-	ENBDON_01960	381	1.5e-131	0.958	0.899	0.896	UniRef:UniRef90_UPI00081A37DB
contig_1	cds	2078807	2079934	+	ENBDON_01961	740	5.8e-270	1	1	0.981	UniRef:UniRef90_N1LWJ1
contig_1	cds	2080289	2080582	+	ENBDON_01962	187	5.8e-60	0.99	0.897	0.896	UniRef:UniRef90_UPI0003AAFDC4
contig_1	cds	2080702	2081568	-	ENBDON_01963	-	-	-	-	-	-
contig_1	cds	2082751	2084547	-	ENBDON_01964	1075	0	1	1	0.998	UniRef:UniRef90_A0A5M3YK47
contig_1	cds	2084544	2085032	-	ENBDON_01965	-	0	1	1	1	UniRef:UniRef100_A0A5M3YLH1
contig_1	cds	2085019	2085279	-	ENBDON_01966	150	4.8e-46	0.907	1	0.974	UniRef:UniRef90_UPI00092C77A8
contig_1	cds	2085276	2087147	-	ENBDON_01967	1212	0	0.992	0.877	0.981	UniRef:UniRef90_A0A5M3YIA3
contig_1	cds	2087164	2087274	-	ENBDON_01968	-	-	-	-	-	-
contig_1	cds	2087395	2087604	-	ENBDON_01969	99	4.3e-26	0.855	0.952	0.847	UniRef:UniRef90_A0A5M3YIA7
contig_1	cds	2088417	2089304	+	ENBDON_01970	-	-	-	-	-	-
contig_1	cds	2089749	2091557	-	ENBDON_01971	1082	0	1	1	0.973	UniRef:UniRef90_M2XSX4
contig_1	cds	2092216	2092854	+	ENBDON_01972	383	4.1e-134	1	0.995	0.925	UniRef:UniRef90_M2XCE3
contig_1	cds	2093057	2093947	+	ENBDON_01973	596	1.3e-215	1	1	0.993	UniRef:UniRef90_A0A098BIK4
contig_1	cds	2094117	2095199	+	ENBDON_01974	691	2.7e-250	1	0.878	0.947	UniRef:UniRef90_M2ZQP2
contig_1	cds	2095278	2096414	+	ENBDON_01975	744	3.4e-271	1.005	1	0.979	UniRef:UniRef90_A0A098BJW8
contig_1	cds	2096495	2098168	+	ENBDON_01976	-	0	1	1	1	UniRef:UniRef100_A0A0M8PCF8
contig_1	cds	2098161	2098571	+	ENBDON_01977	-	0	1	1	1	UniRef:UniRef100_A0A0M9WLR0
contig_1	cds	2098680	2103497	+	ENBDON_01978	2934	0	1.001	0.998	0.942	UniRef:UniRef90_A0A385HM40
contig_1	cds	2103549	2103983	+	ENBDON_01979	-	0	1	1	1	UniRef:UniRef100_A0A0M9WLR1
contig_1	cds	2103976	2104680	+	ENBDON_01980	424	1e-149	1	1	0.897	UniRef:UniRef90_A0A098BJX3
contig_1	cds	2104667	2105587	-	ENBDON_01981	422	1.9e-146	1.029	1	0.841	UniRef:UniRef90_M2YMQ3
contig_1	cds	2105575	2107164	-	ENBDON_01982	1057	0	1	0.989	0.934	UniRef:UniRef90_A0A6H1BYW1
contig_1	cds	2107229	2107621	-	ENBDON_01983	-	0	1	1	1	UniRef:UniRef100_M2Z791
contig_1	cds	2107796	2108419	+	ENBDON_01984	-	0	1	1	1	UniRef:UniRef100_M2ZQQ1
contig_1	cds	2108484	2108747	+	ENBDON_01985	-	0	1	1	1	UniRef:UniRef100_A0A098BIM0
contig_1	cds	2108734	2109210	+	ENBDON_01986	279	1.4e-94	1	1	0.911	UniRef:UniRef90_A0A098BJY0
contig_1	cds	2109293	2111875	-	ENBDON_01987	1640	0	1	1	0.95	UniRef:UniRef90_A0A098BLH0
contig_1	cds	2111938	2113182	-	ENBDON_01988	-	0	1	1	1	UniRef:UniRef100_A0A0M8PC10
contig_1	cds	2113322	2113942	+	ENBDON_01989	-	0	1	1	1	UniRef:UniRef100_UPI0025A27B75
contig_1	cds	2113970	2114449	+	ENBDON_01990	-	0	1	1	1	UniRef:UniRef100_A0A0M8PBS5
contig_1	cds	2114470	2115267	+	ENBDON_01991	520	1.8e-186	1	1	0.943	UniRef:UniRef90_A0A098BJY6
contig_1	cds	2115264	2116055	-	ENBDON_01992	-	0	1	1	1	UniRef:UniRef100_A0A0M8PIF4
[truncated: 3,265 more rows]
