# Supplementary material for: Whole Genome of Petroleum Hydrocarbon Degrading Rhodococcus indonesiensis isolated from Nacharam, Hyderabad, India
Source: Research Square preprint supplement (doi:10.21203/rs.3.rs-6309542/v1), 2025-09-26
Supplement: Supplementary file 9 [file 81c38d3ff8a6f2e92fde3d1d.docx]

| **Statistics without reference** | **Assembly** |
| --- | --- |
| # contigs | **2** |
| # contigs (>= 0 bp) | **2** |
| # contigs (>= 1000 bp) | **2** |
| # contigs (>= 5000 bp) | **2** |
| # contigs (>= 10000 bp) | **2** |
| # contigs (>= 25000 bp) | **2** |
| # contigs (>= 50000 bp) | **2** |
| Largest contig | **5,536,171** |
| Total length | **5,695,289** |
| Total length (>= 0 bp) | **5,695,289** |
| Total length (>= 1000 bp) | **5,695,289** |
| Total length (>= 5000 bp) | **5,695,289** |
| Total length (>= 10000 bp) | **5,695,289** |
| Total length (>= 25000 bp) | **5,695,289** |
| Total length (>= 50000 bp) | **5,695,289** |
| N50 | **5,536,171** |
| N90 | **5,536,171** |
| auN | **5,385,944** |
| L50 | **1** |
| L90 | **1** |
| GC (%) | **70.08** |
| Per base quality | **-** |
| # N's per 100 kbp | **0** |
| # N's | **0** |

**Table: 1 QUAST Statistics of SARSHI1**

Bottom of Form


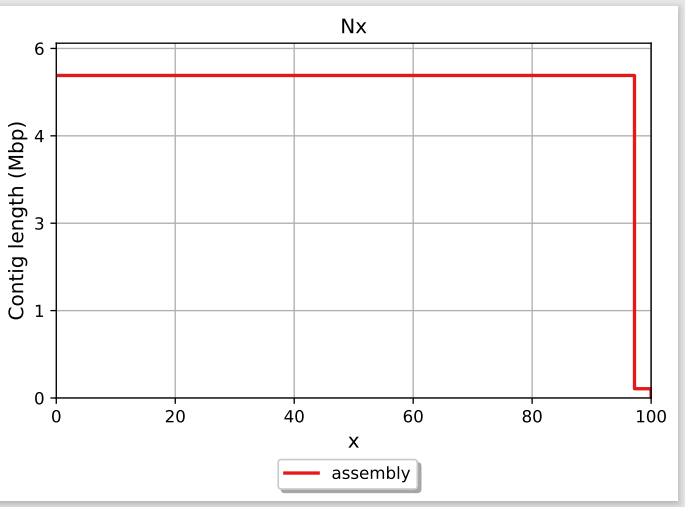


**Fig. 1 Genome Assembly Nx Plot**


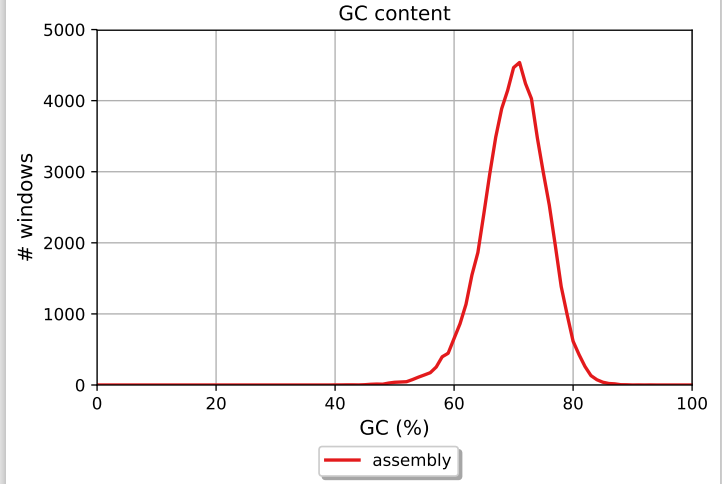


**Fig. 2 Genome Assembly GC Content**


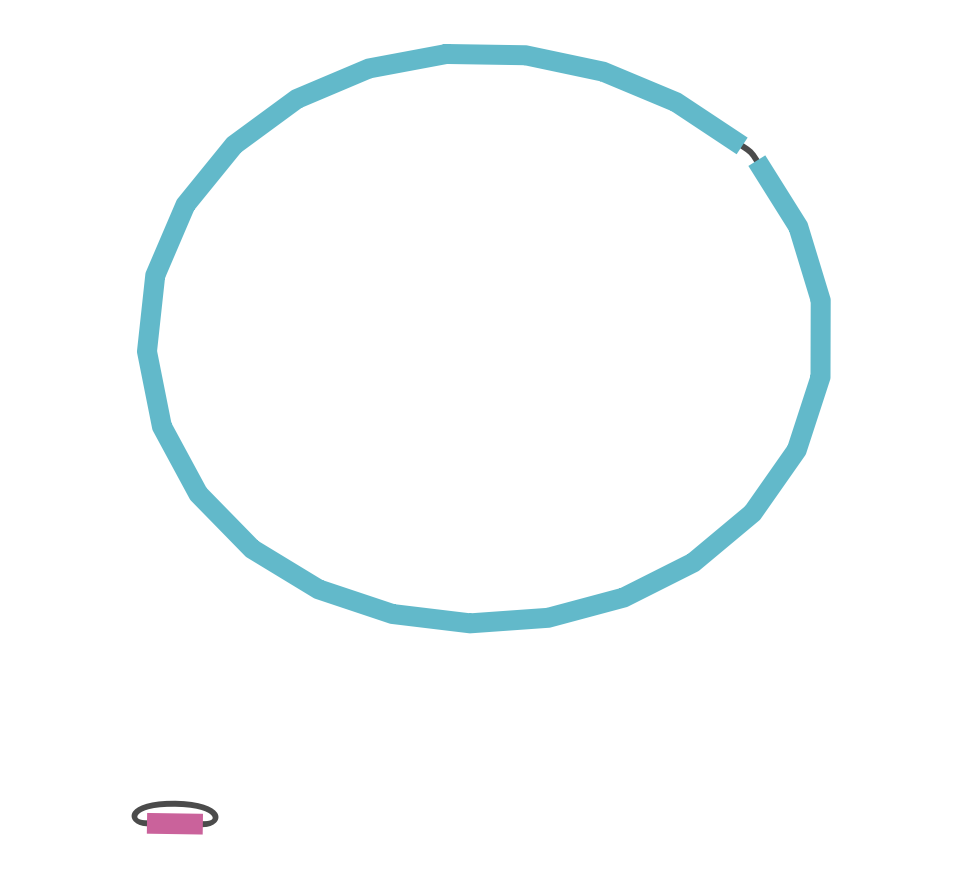


**Fig. 3 Genome Assembly visualization using Bandage**
