# Supplementary material for: Whole Genome of Petroleum Hydrocarbon Degrading Rhodococcus indonesiensis isolated from Nacharam, Hyderabad, India
Source: Research Square preprint supplement (doi:10.21203/rs.3.rs-6309542/v1), 2025-09-26
Supplement: Supplementary file 10 [file a0cb53bb7ae18dc5c6e50cf6.xlsx]

## Sheet: Sheet1
Sequence Name	Sequence Description	Sequence Data	Sequence Length	Blast Hits Count	Blast Min E-Value	Blast Similarity Mean	Blast Database	Blast Hit Description (HSP)	Blast Hit Taxonomy Name	Blast Hit E-Value	Blast Hit Length	Blast Hit Alignment Length	Blast Hit HSP Start	Blast Hit HSP End	Blast Hit Query Start	Blast Hit Query End	Blast Hit Positives	Blast Hit Similarity	Blast Hit HSP/Hit	Blast Hit HSP/Query	Blast Hit HSPs Number	Blast Hit Frame	Blast Hit Gene Identifier	Blast Hit Accession	Blast Hit Score	Blast Top Hit Description (HSP)	Blast Top Hit Taxonomy Name	Blast Top Hit E-Value	Blast Top Hit Length	Blast Top Hit Alignment Length	Blast Top Hit HSP Start	Blast Top Hit HSP End	Blast Top Hit Query Start	Blast Top Hit Query End	Blast Top Hit Positives	Blast Top Hit Similarity	Blast Top Hit HSP/Hit	Blast Top Hit HSP/Query	Blast Top Hit HSPs Number	Blast Top Hit Frame	Blast Top Hit Gene Identifier	Blast Top Hit Accession	Blast Top Hit Score	Mapping Gene Name	Mapping Taxa ID	Mapping XRef	Mapping XRef Database	Mapping GO ID	Mapping GO Term
ENBDON_00001	MULTISPECIES: chromosomal replication initiator protein DnaA	VTDEPNALADVWPDVVAELTADGEGLSKGQKAWLALVKPITLAQGFALLSVPSSFAQEAIERDLREPILRALHRTLGHRVEGLGVRIEPSATVDDPAEDPYAVPRDTLPLEGLPPDPRSPEPHSFDTRPIVAGPPESRPRESERHDMAHPFRRRRPSSLDHGMLEVDTGELEEVDDDREAMTAVRESWPSYFTQPPPPATASPTGSSSLNAKYTFDTFVIGASNRFAHAAAVAIAEAPARAYNPLFIWGASGLGKTHLLHAAGHYAQRLFPGMRVKYVSTEEFTNDFINSLRDDRKVAFKRRYRETDILLVDDIQFIEGKEGIQEEFFHTFNTLHNANKQIVVSSDRPPKQLATLEERLRTRFEWGLITDVQPPELETRIAILSKKARMDRLDVPHDVL…	548	20	0	0.9189	/data/input/nr_20241120.dmnd	MULTISPECIES: chromosomal replication initiator protein DnaA [Rhodococcus]/EME64455.1 chromosomal replication initiation protein [Rhodococcus ruber BKS 20-38]/KOS58081.1 chromosomal replication initiator protein DnaA [Rhodococcus rhodochrous KG-21]	Rhodococcus/Rhodococcus ruber BKS 20-38/Rhodococcus rhodochrous KG-21	0	548	548	1	548	1	548	548	1	1	1	1	0		WP_003936646/WP_003936646/WP_003936646	1059	EME64455.1 chromosomal replication initiation protein [Rhodococcus ruber BKS 20-38]/MULTISPECIES: chromosomal replication initiator protein DnaA [Rhodococcus]/KOS58081.1 chromosomal replication initiator protein DnaA [Rhodococcus rhodochrous KG-21]	Rhodococcus rhodochrous KG-21/Rhodococcus/Rhodococcus ruber BKS 20-38	0	548	548	1	548	1	548	548	1	1	1	1	0		WP_003936646;WP_003936646;WP_003936646	1059	dnaA	1830	WP_017681018		GO:0006270-IEA	DNA replication initiation-IEA
ENBDON_00001	MULTISPECIES: chromosomal replication initiator protein DnaA	VTDEPNALADVWPDVVAELTADGEGLSKGQKAWLALVKPITLAQGFALLSVPSSFAQEAIERDLREPILRALHRTLGHRVEGLGVRIEPSATVDDPAEDPYAVPRDTLPLEGLPPDPRSPEPHSFDTRPIVAGPPESRPRESERHDMAHPFRRRRPSSLDHGMLEVDTGELEEVDDDREAMTAVRESWPSYFTQPPPPATASPTGSSSLNAKYTFDTFVIGASNRFAHAAAVAIAEAPARAYNPLFIWGASGLGKTHLLHAAGHYAQRLFPGMRVKYVSTEEFTNDFINSLRDDRKVAFKRRYRETDILLVDDIQFIEGKEGIQEEFFHTFNTLHNANKQIVVSSDRPPKQLATLEERLRTRFEWGLITDVQPPELETRIAILSKKARMDRLDVPHDVL…	548	20	0	0.9189	/data/input/nr_20241120.dmnd	MULTISPECIES: chromosomal replication initiator protein DnaA [Rhodococcus]/MDO2379392.1 chromosomal replication initiator protein DnaA [Rhodococcus ruber]/ATQ30109.1 chromosomal replication initiation protein DnaA [Rhodococcus ruber]/MCF8784772.1 chromosomal replication initiator protein DnaA [Rhodococcus ruber]/MCZ1073802.1 chromosomal replication initiator protein DnaA [Rhodococcus sp. A5(2022)…	Rhodococcus/Rhodococcus ruber/Rhodococcus ruber/Rhodococcus ruber/Rhodococcus sp. A5(2022)/Rhodococcus ruber	0	548	548	1	548	1	548	517	0.9434	1	1	1	0		WP_010595440/WP_010595440/WP_010595440	981	EME64455.1 chromosomal replication initiation protein [Rhodococcus ruber BKS 20-38]/MULTISPECIES: chromosomal replication initiator protein DnaA [Rhodococcus]/KOS58081.1 chromosomal replication initiator protein DnaA [Rhodococcus rhodochrous KG-21]	Rhodococcus rhodochrous KG-21/Rhodococcus/Rhodococcus ruber BKS 20-38	0	548	548	1	548	1	548	548	1	1	1	1	0		WP_003936646;WP_003936646;WP_003936646	1059	dnaA	1441923	WP_003936646		GO:0003677-IEA	DNA binding-IEA
ENBDON_00001	MULTISPECIES: chromosomal replication initiator protein DnaA	VTDEPNALADVWPDVVAELTADGEGLSKGQKAWLALVKPITLAQGFALLSVPSSFAQEAIERDLREPILRALHRTLGHRVEGLGVRIEPSATVDDPAEDPYAVPRDTLPLEGLPPDPRSPEPHSFDTRPIVAGPPESRPRESERHDMAHPFRRRRPSSLDHGMLEVDTGELEEVDDDREAMTAVRESWPSYFTQPPPPATASPTGSSSLNAKYTFDTFVIGASNRFAHAAAVAIAEAPARAYNPLFIWGASGLGKTHLLHAAGHYAQRLFPGMRVKYVSTEEFTNDFINSLRDDRKVAFKRRYRETDILLVDDIQFIEGKEGIQEEFFHTFNTLHNANKQIVVSSDRPPKQLATLEERLRTRFEWGLITDVQPPELETRIAILSKKARMDRLDVPHDVL…	548	20	0	0.9189	/data/input/nr_20241120.dmnd	chromosomal replication initiator protein DnaA [Rhodococcus ruber]/MBP2214165.1 chromosomal replication initiator protein [Rhodococcus ruber]	Rhodococcus ruber/Rhodococcus ruber	0	548	548	1	548	1	548	517	0.9434	1	1	1	0		WP_210063149	980	EME64455.1 chromosomal replication initiation protein [Rhodococcus ruber BKS 20-38]/MULTISPECIES: chromosomal replication initiator protein DnaA [Rhodococcus]/KOS58081.1 chromosomal replication initiator protein DnaA [Rhodococcus rhodochrous KG-21]	Rhodococcus rhodochrous KG-21/Rhodococcus/Rhodococcus ruber BKS 20-38	0	548	548	1	548	1	548	548	1	1	1	1	0		WP_003936646;WP_003936646;WP_003936646	1059	dnaA	191292	WP_044475805		GO:0003688-IEA	DNA replication origin binding-IEA
ENBDON_00001	MULTISPECIES: chromosomal replication initiator protein DnaA	VTDEPNALADVWPDVVAELTADGEGLSKGQKAWLALVKPITLAQGFALLSVPSSFAQEAIERDLREPILRALHRTLGHRVEGLGVRIEPSATVDDPAEDPYAVPRDTLPLEGLPPDPRSPEPHSFDTRPIVAGPPESRPRESERHDMAHPFRRRRPSSLDHGMLEVDTGELEEVDDDREAMTAVRESWPSYFTQPPPPATASPTGSSSLNAKYTFDTFVIGASNRFAHAAAVAIAEAPARAYNPLFIWGASGLGKTHLLHAAGHYAQRLFPGMRVKYVSTEEFTNDFINSLRDDRKVAFKRRYRETDILLVDDIQFIEGKEGIQEEFFHTFNTLHNANKQIVVSSDRPPKQLATLEERLRTRFEWGLITDVQPPELETRIAILSKKARMDRLDVPHDVL…	548	20	0	0.9189	/data/input/nr_20241120.dmnd	chromosomal replication initiator protein DnaA [Rhodococcus ruber]	Rhodococcus ruber	0	566	553	14	566	1	548	515	0.9313	0.977	1.0091	1	0		AXY49461	971	EME64455.1 chromosomal replication initiation protein [Rhodococcus ruber BKS 20-38]/MULTISPECIES: chromosomal replication initiator protein DnaA [Rhodococcus]/KOS58081.1 chromosomal replication initiator protein DnaA [Rhodococcus rhodochrous KG-21]	Rhodococcus rhodochrous KG-21/Rhodococcus/Rhodococcus ruber BKS 20-38	0	548	548	1	548	1	548	548	1	1	1	1	0		WP_003936646;WP_003936646;WP_003936646	1059	dnaA	1278076	WP_003936646		GO:0006260-IEA	DNA replication-IEA
ENBDON_00001	MULTISPECIES: chromosomal replication initiator protein DnaA	VTDEPNALADVWPDVVAELTADGEGLSKGQKAWLALVKPITLAQGFALLSVPSSFAQEAIERDLREPILRALHRTLGHRVEGLGVRIEPSATVDDPAEDPYAVPRDTLPLEGLPPDPRSPEPHSFDTRPIVAGPPESRPRESERHDMAHPFRRRRPSSLDHGMLEVDTGELEEVDDDREAMTAVRESWPSYFTQPPPPATASPTGSSSLNAKYTFDTFVIGASNRFAHAAAVAIAEAPARAYNPLFIWGASGLGKTHLLHAAGHYAQRLFPGMRVKYVSTEEFTNDFINSLRDDRKVAFKRRYRETDILLVDDIQFIEGKEGIQEEFFHTFNTLHNANKQIVVSSDRPPKQLATLEERLRTRFEWGLITDVQPPELETRIAILSKKARMDRLDVPHDVL…	548	20	0	0.9189	/data/input/nr_20241120.dmnd	MULTISPECIES: chromosomal replication initiator protein DnaA [Rhodococcus]/RIK10859.1 MAG: chromosomal replication initiator protein DnaA [Acidobacteriota bacterium]/AUM19130.1 chromosomal replication initiation protein DnaA [Rhodococcus ruber]/AWG97085.1 chromosomal replication initiator protein DnaA [Rhodococcus ruber]/KXF85730.1 chromosomal replication initiator protein DnaA [Rhodococcus ruber…	Rhodococcus/Acidobacteriota bacterium/Rhodococcus ruber/Rhodococcus ruber/Rhodococcus ruber Chol-4/Rhodococcus ruber	0	553	553	1	553	1	548	515	0.9313	1	1.0091	1	0		WP_017681018/WP_017681018/WP_017681018/WP_017681018	970	EME64455.1 chromosomal replication initiation protein [Rhodococcus ruber BKS 20-38]/MULTISPECIES: chromosomal replication initiator protein DnaA [Rhodococcus]/KOS58081.1 chromosomal replication initiator protein DnaA [Rhodococcus rhodochrous KG-21]	Rhodococcus rhodochrous KG-21/Rhodococcus/Rhodococcus ruber BKS 20-38	0	548	548	1	548	1	548	548	1	1	1	1	0		WP_003936646;WP_003936646;WP_003936646	1059	dnaA	1830	WP_017681018		GO:0005737-IEA	cytoplasm-IEA
ENBDON_00001	MULTISPECIES: chromosomal replication initiator protein DnaA	VTDEPNALADVWPDVVAELTADGEGLSKGQKAWLALVKPITLAQGFALLSVPSSFAQEAIERDLREPILRALHRTLGHRVEGLGVRIEPSATVDDPAEDPYAVPRDTLPLEGLPPDPRSPEPHSFDTRPIVAGPPESRPRESERHDMAHPFRRRRPSSLDHGMLEVDTGELEEVDDDREAMTAVRESWPSYFTQPPPPATASPTGSSSLNAKYTFDTFVIGASNRFAHAAAVAIAEAPARAYNPLFIWGASGLGKTHLLHAAGHYAQRLFPGMRVKYVSTEEFTNDFINSLRDDRKVAFKRRYRETDILLVDDIQFIEGKEGIQEEFFHTFNTLHNANKQIVVSSDRPPKQLATLEERLRTRFEWGLITDVQPPELETRIAILSKKARMDRLDVPHDVL…	548	20	0	0.9189	/data/input/nr_20241120.dmnd	chromosomal replication initiator protein DnaA [Rhodococcus aetherivorans]/ETT26609.1 Chromosomal replication initiator protein dnaA [Rhodococcus rhodochrous ATCC 21198]/KDE11416.1 chromosomal replication initiator protein DnaA [Rhodococcus aetherivorans]/NGP25236.1 chromosomal replication initiator protein DnaA [Rhodococcus aetherivorans]/GES40139.1 chromosomal replication initiator protein DnaA…	Rhodococcus aetherivorans/Rhodococcus rhodochrous ATCC 21198/Rhodococcus aetherivorans/Rhodococcus aetherivorans/Rhodococcus aetherivorans	0	543	548	1	543	1	548	508	0.927	1.0092	1	1	0		WP_029546802/WP_029546802	955	EME64455.1 chromosomal replication initiation protein [Rhodococcus ruber BKS 20-38]/MULTISPECIES: chromosomal replication initiator protein DnaA [Rhodococcus]/KOS58081.1 chromosomal replication initiator protein DnaA [Rhodococcus rhodochrous KG-21]	Rhodococcus rhodochrous KG-21/Rhodococcus/Rhodococcus ruber BKS 20-38	0	548	548	1	548	1	548	548	1	1	1	1	0		WP_003936646;WP_003936646;WP_003936646	1059	dnaA	1278076	WP_003936646		GO:0006275-IEA	regulation of DNA replication-IEA
ENBDON_00001	MULTISPECIES: chromosomal replication initiator protein DnaA	VTDEPNALADVWPDVVAELTADGEGLSKGQKAWLALVKPITLAQGFALLSVPSSFAQEAIERDLREPILRALHRTLGHRVEGLGVRIEPSATVDDPAEDPYAVPRDTLPLEGLPPDPRSPEPHSFDTRPIVAGPPESRPRESERHDMAHPFRRRRPSSLDHGMLEVDTGELEEVDDDREAMTAVRESWPSYFTQPPPPATASPTGSSSLNAKYTFDTFVIGASNRFAHAAAVAIAEAPARAYNPLFIWGASGLGKTHLLHAAGHYAQRLFPGMRVKYVSTEEFTNDFINSLRDDRKVAFKRRYRETDILLVDDIQFIEGKEGIQEEFFHTFNTLHNANKQIVVSSDRPPKQLATLEERLRTRFEWGLITDVQPPELETRIAILSKKARMDRLDVPHDVL…	548	20	0	0.9189	/data/input/nr_20241120.dmnd	chromosomal replication initiator protein DnaA [Rhodococcus sp. 14C212]	Rhodococcus sp. 14C212	0	565	548	18	565	1	548	505	0.9215	0.9699	1	1	0		WP_206024506	954	EME64455.1 chromosomal replication initiation protein [Rhodococcus ruber BKS 20-38]/MULTISPECIES: chromosomal replication initiator protein DnaA [Rhodococcus]/KOS58081.1 chromosomal replication initiator protein DnaA [Rhodococcus rhodochrous KG-21]	Rhodococcus rhodochrous KG-21/Rhodococcus/Rhodococcus ruber BKS 20-38	0	548	548	1	548	1	548	548	1	1	1	1	0		WP_003936646;WP_003936646;WP_003936646	1059	dnaA	191292	WP_044475805		GO:0005524-IEA	ATP binding-IEA
ENBDON_00001	MULTISPECIES: chromosomal replication initiator protein DnaA	VTDEPNALADVWPDVVAELTADGEGLSKGQKAWLALVKPITLAQGFALLSVPSSFAQEAIERDLREPILRALHRTLGHRVEGLGVRIEPSATVDDPAEDPYAVPRDTLPLEGLPPDPRSPEPHSFDTRPIVAGPPESRPRESERHDMAHPFRRRRPSSLDHGMLEVDTGELEEVDDDREAMTAVRESWPSYFTQPPPPATASPTGSSSLNAKYTFDTFVIGASNRFAHAAAVAIAEAPARAYNPLFIWGASGLGKTHLLHAAGHYAQRLFPGMRVKYVSTEEFTNDFINSLRDDRKVAFKRRYRETDILLVDDIQFIEGKEGIQEEFFHTFNTLHNANKQIVVSSDRPPKQLATLEERLRTRFEWGLITDVQPPELETRIAILSKKARMDRLDVPHDVL…	548	20	0	0.9189	/data/input/nr_20241120.dmnd	chromosomal replication initiator protein DnaA [Rhodococcus sp. 14C212]	Rhodococcus sp. 14C212	0	548	548	1	548	1	548	505	0.9215	1	1	1	0		NGP05613	953	EME64455.1 chromosomal replication initiation protein [Rhodococcus ruber BKS 20-38]/MULTISPECIES: chromosomal replication initiator protein DnaA [Rhodococcus]/KOS58081.1 chromosomal replication initiator protein DnaA [Rhodococcus rhodochrous KG-21]	Rhodococcus rhodochrous KG-21/Rhodococcus/Rhodococcus ruber BKS 20-38	0	548	548	1	548	1	548	548	1	1	1	1	0		WP_003936646;WP_003936646;WP_003936646	1059	dnaA	1278076	WP_003936646		GO:0016887-IEA	ATP hydrolysis activity-IEA
ENBDON_00001	MULTISPECIES: chromosomal replication initiator protein DnaA	VTDEPNALADVWPDVVAELTADGEGLSKGQKAWLALVKPITLAQGFALLSVPSSFAQEAIERDLREPILRALHRTLGHRVEGLGVRIEPSATVDDPAEDPYAVPRDTLPLEGLPPDPRSPEPHSFDTRPIVAGPPESRPRESERHDMAHPFRRRRPSSLDHGMLEVDTGELEEVDDDREAMTAVRESWPSYFTQPPPPATASPTGSSSLNAKYTFDTFVIGASNRFAHAAAVAIAEAPARAYNPLFIWGASGLGKTHLLHAAGHYAQRLFPGMRVKYVSTEEFTNDFINSLRDDRKVAFKRRYRETDILLVDDIQFIEGKEGIQEEFFHTFNTLHNANKQIVVSSDRPPKQLATLEERLRTRFEWGLITDVQPPELETRIAILSKKARMDRLDVPHDVL…	548	20	0	0.9189	/data/input/nr_20241120.dmnd	Chromosomal replication initiator protein DnaA [Rhodococcus aetherivorans]	Rhodococcus aetherivorans	0	556	548	14	556	1	548	502	0.9161	0.9856	1	1	0		CCW10974	944	EME64455.1 chromosomal replication initiation protein [Rhodococcus ruber BKS 20-38]/MULTISPECIES: chromosomal replication initiator protein DnaA [Rhodococcus]/KOS58081.1 chromosomal replication initiator protein DnaA [Rhodococcus rhodochrous KG-21]	Rhodococcus rhodochrous KG-21/Rhodococcus/Rhodococcus ruber BKS 20-38	0	548	548	1	548	1	548	548	1	1	1	1	0		WP_003936646;WP_003936646;WP_003936646	1059	dnaA	1278076	WP_003936646		GO:0005886-IEA	plasma membrane-IEA
ENBDON_00001	MULTISPECIES: chromosomal replication initiator protein DnaA	VTDEPNALADVWPDVVAELTADGEGLSKGQKAWLALVKPITLAQGFALLSVPSSFAQEAIERDLREPILRALHRTLGHRVEGLGVRIEPSATVDDPAEDPYAVPRDTLPLEGLPPDPRSPEPHSFDTRPIVAGPPESRPRESERHDMAHPFRRRRPSSLDHGMLEVDTGELEEVDDDREAMTAVRESWPSYFTQPPPPATASPTGSSSLNAKYTFDTFVIGASNRFAHAAAVAIAEAPARAYNPLFIWGASGLGKTHLLHAAGHYAQRLFPGMRVKYVSTEEFTNDFINSLRDDRKVAFKRRYRETDILLVDDIQFIEGKEGIQEEFFHTFNTLHNANKQIVVSSDRPPKQLATLEERLRTRFEWGLITDVQPPELETRIAILSKKARMDRLDVPHDVL…	548	20	0	0.9189	/data/input/nr_20241120.dmnd	chromosomal replication initiator protein DnaA [Rhodococcus aetherivorans]	Rhodococcus aetherivorans	0	536	541	1	536	8	548	502	0.9279	1.0093	0.9872	1	0		WP_241258710	943	EME64455.1 chromosomal replication initiation protein [Rhodococcus ruber BKS 20-38]/MULTISPECIES: chromosomal replication initiator protein DnaA [Rhodococcus]/KOS58081.1 chromosomal replication initiator protein DnaA [Rhodococcus rhodochrous KG-21]	Rhodococcus rhodochrous KG-21/Rhodococcus/Rhodococcus ruber BKS 20-38	0	548	548	1	548	1	548	548	1	1	1	1	0		WP_003936646;WP_003936646;WP_003936646	1059	dnaA	1278076	WP_003936646
ENBDON_00001	MULTISPECIES: chromosomal replication initiator protein DnaA	VTDEPNALADVWPDVVAELTADGEGLSKGQKAWLALVKPITLAQGFALLSVPSSFAQEAIERDLREPILRALHRTLGHRVEGLGVRIEPSATVDDPAEDPYAVPRDTLPLEGLPPDPRSPEPHSFDTRPIVAGPPESRPRESERHDMAHPFRRRRPSSLDHGMLEVDTGELEEVDDDREAMTAVRESWPSYFTQPPPPATASPTGSSSLNAKYTFDTFVIGASNRFAHAAAVAIAEAPARAYNPLFIWGASGLGKTHLLHAAGHYAQRLFPGMRVKYVSTEEFTNDFINSLRDDRKVAFKRRYRETDILLVDDIQFIEGKEGIQEEFFHTFNTLHNANKQIVVSSDRPPKQLATLEERLRTRFEWGLITDVQPPELETRIAILSKKARMDRLDVPHDVL…	548	20	0	0.9189	/data/input/nr_20241120.dmnd	MULTISPECIES: chromosomal replication initiator protein DnaA [Rhodococcus]/NCL77110.1 Chromosomal replication initiator protein DnaA [Rhodococcus sp. YH1]/AKE87879.1 chromosomal replication initiator protein DnaA [Rhodococcus aetherivorans]/ANZ27483.1 chromosomal replication initiation protein DnaA [Rhodococcus sp. WB1]/MBC2590266.1 chromosomal replication initiator protein DnaA [Rhodococcus aeth…	Rhodococcus/Rhodococcus sp. YH1/Rhodococcus aetherivorans/Rhodococcus sp. WB1/Rhodococcus aetherivorans/Rhodococcus aetherivorans	0	543	548	1	543	1	548	502	0.9161	1.0092	1	1	0		WP_044475805/WP_044475805/WP_044475805/WP_044475805	943	EME64455.1 chromosomal replication initiation protein [Rhodococcus ruber BKS 20-38]/MULTISPECIES: chromosomal replication initiator protein DnaA [Rhodococcus]/KOS58081.1 chromosomal replication initiator protein DnaA [Rhodococcus rhodochrous KG-21]	Rhodococcus rhodochrous KG-21/Rhodococcus/Rhodococcus ruber BKS 20-38	0	548	548	1	548	1	548	548	1	1	1	1	0		WP_003936646;WP_003936646;WP_003936646	1059	dnaA	191292	WP_044475805
ENBDON_00001	MULTISPECIES: chromosomal replication initiator protein DnaA	VTDEPNALADVWPDVVAELTADGEGLSKGQKAWLALVKPITLAQGFALLSVPSSFAQEAIERDLREPILRALHRTLGHRVEGLGVRIEPSATVDDPAEDPYAVPRDTLPLEGLPPDPRSPEPHSFDTRPIVAGPPESRPRESERHDMAHPFRRRRPSSLDHGMLEVDTGELEEVDDDREAMTAVRESWPSYFTQPPPPATASPTGSSSLNAKYTFDTFVIGASNRFAHAAAVAIAEAPARAYNPLFIWGASGLGKTHLLHAAGHYAQRLFPGMRVKYVSTEEFTNDFINSLRDDRKVAFKRRYRETDILLVDDIQFIEGKEGIQEEFFHTFNTLHNANKQIVVSSDRPPKQLATLEERLRTRFEWGLITDVQPPELETRIAILSKKARMDRLDVPHDVL…	548	20	0	0.9189	/data/input/nr_20241120.dmnd	chromosomal replication initiator protein DnaA [Rhodococcus rhodochrous]	Rhodococcus rhodochrous	0	543	548	1	543	1	548	501	0.9142	1.0092	1	1	0		OOL28948	941	EME64455.1 chromosomal replication initiation protein [Rhodococcus ruber BKS 20-38]/MULTISPECIES: chromosomal replication initiator protein DnaA [Rhodococcus]/KOS58081.1 chromosomal replication initiator protein DnaA [Rhodococcus rhodochrous KG-21]	Rhodococcus rhodochrous KG-21/Rhodococcus/Rhodococcus ruber BKS 20-38	0	548	548	1	548	1	548	548	1	1	1	1	0		WP_003936646;WP_003936646;WP_003936646	1059	dnaA	1441923	WP_003936646
ENBDON_00001	MULTISPECIES: chromosomal replication initiator protein DnaA	VTDEPNALADVWPDVVAELTADGEGLSKGQKAWLALVKPITLAQGFALLSVPSSFAQEAIERDLREPILRALHRTLGHRVEGLGVRIEPSATVDDPAEDPYAVPRDTLPLEGLPPDPRSPEPHSFDTRPIVAGPPESRPRESERHDMAHPFRRRRPSSLDHGMLEVDTGELEEVDDDREAMTAVRESWPSYFTQPPPPATASPTGSSSLNAKYTFDTFVIGASNRFAHAAAVAIAEAPARAYNPLFIWGASGLGKTHLLHAAGHYAQRLFPGMRVKYVSTEEFTNDFINSLRDDRKVAFKRRYRETDILLVDDIQFIEGKEGIQEEFFHTFNTLHNANKQIVVSSDRPPKQLATLEERLRTRFEWGLITDVQPPELETRIAILSKKARMDRLDVPHDVL…	548	20	0	0.9189	/data/input/nr_20241120.dmnd	chromosomal replication initiator protein DnaA [Rhodococcus sp. CX]/MBH0123300.1 chromosomal replication initiator protein DnaA [Rhodococcus sp. CX]	Rhodococcus sp. CX/Rhodococcus sp. CX	0	534	549	1	534	1	548	497	0.9053	1.0281	1.0018	1	0		WP_197257102	909	EME64455.1 chromosomal replication initiation protein [Rhodococcus ruber BKS 20-38]/MULTISPECIES: chromosomal replication initiator protein DnaA [Rhodococcus]/KOS58081.1 chromosomal replication initiator protein DnaA [Rhodococcus rhodochrous KG-21]	Rhodococcus rhodochrous KG-21/Rhodococcus/Rhodococcus ruber BKS 20-38	0	548	548	1	548	1	548	548	1	1	1	1	0		WP_003936646;WP_003936646;WP_003936646	1059	dnaA	1441923	WP_003936646
ENBDON_00001	MULTISPECIES: chromosomal replication initiator protein DnaA	VTDEPNALADVWPDVVAELTADGEGLSKGQKAWLALVKPITLAQGFALLSVPSSFAQEAIERDLREPILRALHRTLGHRVEGLGVRIEPSATVDDPAEDPYAVPRDTLPLEGLPPDPRSPEPHSFDTRPIVAGPPESRPRESERHDMAHPFRRRRPSSLDHGMLEVDTGELEEVDDDREAMTAVRESWPSYFTQPPPPATASPTGSSSLNAKYTFDTFVIGASNRFAHAAAVAIAEAPARAYNPLFIWGASGLGKTHLLHAAGHYAQRLFPGMRVKYVSTEEFTNDFINSLRDDRKVAFKRRYRETDILLVDDIQFIEGKEGIQEEFFHTFNTLHNANKQIVVSSDRPPKQLATLEERLRTRFEWGLITDVQPPELETRIAILSKKARMDRLDVPHDVL…	548	20	0	0.9189	/data/input/nr_20241120.dmnd	chromosomal replication initiator protein DnaA [Rhodococcus sp. HM1]/MCK8672156.1 chromosomal replication initiator protein DnaA [Rhodococcus sp. HM1]	Rhodococcus sp. HM1/Rhodococcus sp. HM1	0	534	549	1	534	1	548	496	0.9035	1.0281	1.0018	1	0		WP_248674551	907	EME64455.1 chromosomal replication initiation protein [Rhodococcus ruber BKS 20-38]/MULTISPECIES: chromosomal replication initiator protein DnaA [Rhodococcus]/KOS58081.1 chromosomal replication initiator protein DnaA [Rhodococcus rhodochrous KG-21]	Rhodococcus rhodochrous KG-21/Rhodococcus/Rhodococcus ruber BKS 20-38	0	548	548	1	548	1	548	548	1	1	1	1	0		WP_003936646;WP_003936646;WP_003936646	1059	dnaA	1278076	WP_003936646
ENBDON_00001	MULTISPECIES: chromosomal replication initiator protein DnaA	VTDEPNALADVWPDVVAELTADGEGLSKGQKAWLALVKPITLAQGFALLSVPSSFAQEAIERDLREPILRALHRTLGHRVEGLGVRIEPSATVDDPAEDPYAVPRDTLPLEGLPPDPRSPEPHSFDTRPIVAGPPESRPRESERHDMAHPFRRRRPSSLDHGMLEVDTGELEEVDDDREAMTAVRESWPSYFTQPPPPATASPTGSSSLNAKYTFDTFVIGASNRFAHAAAVAIAEAPARAYNPLFIWGASGLGKTHLLHAAGHYAQRLFPGMRVKYVSTEEFTNDFINSLRDDRKVAFKRRYRETDILLVDDIQFIEGKEGIQEEFFHTFNTLHNANKQIVVSSDRPPKQLATLEERLRTRFEWGLITDVQPPELETRIAILSKKARMDRLDVPHDVL…	548	20	0	0.9189	/data/input/nr_20241120.dmnd	chromosomal replication initiator protein DnaA [Rhodococcus sp. CH91]	Rhodococcus sp. CH91	0	554	555	1	554	1	548	506	0.9117	1.0018	1.0128	1	0		WP_241383551	906	EME64455.1 chromosomal replication initiation protein [Rhodococcus ruber BKS 20-38]/MULTISPECIES: chromosomal replication initiator protein DnaA [Rhodococcus]/KOS58081.1 chromosomal replication initiator protein DnaA [Rhodococcus rhodochrous KG-21]	Rhodococcus rhodochrous KG-21/Rhodococcus/Rhodococcus ruber BKS 20-38	0	548	548	1	548	1	548	548	1	1	1	1	0		WP_003936646;WP_003936646;WP_003936646	1059	dnaA	1830	WP_017681018
ENBDON_00001	MULTISPECIES: chromosomal replication initiator protein DnaA	VTDEPNALADVWPDVVAELTADGEGLSKGQKAWLALVKPITLAQGFALLSVPSSFAQEAIERDLREPILRALHRTLGHRVEGLGVRIEPSATVDDPAEDPYAVPRDTLPLEGLPPDPRSPEPHSFDTRPIVAGPPESRPRESERHDMAHPFRRRRPSSLDHGMLEVDTGELEEVDDDREAMTAVRESWPSYFTQPPPPATASPTGSSSLNAKYTFDTFVIGASNRFAHAAAVAIAEAPARAYNPLFIWGASGLGKTHLLHAAGHYAQRLFPGMRVKYVSTEEFTNDFINSLRDDRKVAFKRRYRETDILLVDDIQFIEGKEGIQEEFFHTFNTLHNANKQIVVSSDRPPKQLATLEERLRTRFEWGLITDVQPPELETRIAILSKKARMDRLDVPHDVL…	548	20	0	0.9189	/data/input/nr_20241120.dmnd	chromosomal replication initiator protein DnaA [Rhodococcus zopfii]	Rhodococcus zopfii	0	534	549	1	534	1	548	496	0.9035	1.0281	1.0018	1	0		WP_072809133	904	EME64455.1 chromosomal replication initiation protein [Rhodococcus ruber BKS 20-38]/MULTISPECIES: chromosomal replication initiator protein DnaA [Rhodococcus]/KOS58081.1 chromosomal replication initiator protein DnaA [Rhodococcus rhodochrous KG-21]	Rhodococcus rhodochrous KG-21/Rhodococcus/Rhodococcus ruber BKS 20-38	0	548	548	1	548	1	548	548	1	1	1	1	0		WP_003936646;WP_003936646;WP_003936646	1059	dnaA	1830	WP_017681018
ENBDON_00001	MULTISPECIES: chromosomal replication initiator protein DnaA	VTDEPNALADVWPDVVAELTADGEGLSKGQKAWLALVKPITLAQGFALLSVPSSFAQEAIERDLREPILRALHRTLGHRVEGLGVRIEPSATVDDPAEDPYAVPRDTLPLEGLPPDPRSPEPHSFDTRPIVAGPPESRPRESERHDMAHPFRRRRPSSLDHGMLEVDTGELEEVDDDREAMTAVRESWPSYFTQPPPPATASPTGSSSLNAKYTFDTFVIGASNRFAHAAAVAIAEAPARAYNPLFIWGASGLGKTHLLHAAGHYAQRLFPGMRVKYVSTEEFTNDFINSLRDDRKVAFKRRYRETDILLVDDIQFIEGKEGIQEEFFHTFNTLHNANKQIVVSSDRPPKQLATLEERLRTRFEWGLITDVQPPELETRIAILSKKARMDRLDVPHDVL…	548	20	0	0.9189	/data/input/nr_20241120.dmnd	chromosomal replication initiator protein DnaA [Rhodococcus zopfii]	Rhodococcus zopfii	0	534	549	1	534	1	548	496	0.9035	1.0281	1.0018	1	0		MDV2477858	902	EME64455.1 chromosomal replication initiation protein [Rhodococcus ruber BKS 20-38]/MULTISPECIES: chromosomal replication initiator protein DnaA [Rhodococcus]/KOS58081.1 chromosomal replication initiator protein DnaA [Rhodococcus rhodochrous KG-21]	Rhodococcus rhodochrous KG-21/Rhodococcus/Rhodococcus ruber BKS 20-38	0	548	548	1	548	1	548	548	1	1	1	1	0		WP_003936646;WP_003936646;WP_003936646	1059	dnaA	191292	WP_044475805
ENBDON_00001	MULTISPECIES: chromosomal replication initiator protein DnaA	VTDEPNALADVWPDVVAELTADGEGLSKGQKAWLALVKPITLAQGFALLSVPSSFAQEAIERDLREPILRALHRTLGHRVEGLGVRIEPSATVDDPAEDPYAVPRDTLPLEGLPPDPRSPEPHSFDTRPIVAGPPESRPRESERHDMAHPFRRRRPSSLDHGMLEVDTGELEEVDDDREAMTAVRESWPSYFTQPPPPATASPTGSSSLNAKYTFDTFVIGASNRFAHAAAVAIAEAPARAYNPLFIWGASGLGKTHLLHAAGHYAQRLFPGMRVKYVSTEEFTNDFINSLRDDRKVAFKRRYRETDILLVDDIQFIEGKEGIQEEFFHTFNTLHNANKQIVVSSDRPPKQLATLEERLRTRFEWGLITDVQPPELETRIAILSKKARMDRLDVPHDVL…	548	20	0	0.9189	/data/input/nr_20241120.dmnd	chromosomal replication initiator protein DnaA [Rhodococcus phenolicus]	Rhodococcus phenolicus	0	534	549	1	534	1	548	495	0.9016	1.0281	1.0018	1	0		WP_068159284	900	EME64455.1 chromosomal replication initiation protein [Rhodococcus ruber BKS 20-38]/MULTISPECIES: chromosomal replication initiator protein DnaA [Rhodococcus]/KOS58081.1 chromosomal replication initiator protein DnaA [Rhodococcus rhodochrous KG-21]	Rhodococcus rhodochrous KG-21/Rhodococcus/Rhodococcus ruber BKS 20-38	0	548	548	1	548	1	548	548	1	1	1	1	0		WP_003936646;WP_003936646;WP_003936646	1059	dnaA	191292	WP_044475805
ENBDON_00001	MULTISPECIES: chromosomal replication initiator protein DnaA	VTDEPNALADVWPDVVAELTADGEGLSKGQKAWLALVKPITLAQGFALLSVPSSFAQEAIERDLREPILRALHRTLGHRVEGLGVRIEPSATVDDPAEDPYAVPRDTLPLEGLPPDPRSPEPHSFDTRPIVAGPPESRPRESERHDMAHPFRRRRPSSLDHGMLEVDTGELEEVDDDREAMTAVRESWPSYFTQPPPPATASPTGSSSLNAKYTFDTFVIGASNRFAHAAAVAIAEAPARAYNPLFIWGASGLGKTHLLHAAGHYAQRLFPGMRVKYVSTEEFTNDFINSLRDDRKVAFKRRYRETDILLVDDIQFIEGKEGIQEEFFHTFNTLHNANKQIVVSSDRPPKQLATLEERLRTRFEWGLITDVQPPELETRIAILSKKARMDRLDVPHDVL…	548	20	0	0.9189	/data/input/nr_20241120.dmnd	chromosomal replication initiator protein DnaA [Rhodococcus sp. Z13]/UYP19024.1 chromosomal replication initiator protein DnaA [Rhodococcus sp. Z13]	Rhodococcus sp. Z13/Rhodococcus sp. Z13	0	547	559	1	547	1	548	498	0.8909	1.0219	1.0201	1	0		WP_264152693	895	EME64455.1 chromosomal replication initiation protein [Rhodococcus ruber BKS 20-38]/MULTISPECIES: chromosomal replication initiator protein DnaA [Rhodococcus]/KOS58081.1 chromosomal replication initiator protein DnaA [Rhodococcus rhodochrous KG-21]	Rhodococcus rhodochrous KG-21/Rhodococcus/Rhodococcus ruber BKS 20-38	0	548	548	1	548	1	548	548	1	1	1	1	0		WP_003936646;WP_003936646;WP_003936646	1059	dnaA	191292	WP_044475805
ENBDON_00001	MULTISPECIES: chromosomal replication initiator protein DnaA	VTDEPNALADVWPDVVAELTADGEGLSKGQKAWLALVKPITLAQGFALLSVPSSFAQEAIERDLREPILRALHRTLGHRVEGLGVRIEPSATVDDPAEDPYAVPRDTLPLEGLPPDPRSPEPHSFDTRPIVAGPPESRPRESERHDMAHPFRRRRPSSLDHGMLEVDTGELEEVDDDREAMTAVRESWPSYFTQPPPPATASPTGSSSLNAKYTFDTFVIGASNRFAHAAAVAIAEAPARAYNPLFIWGASGLGKTHLLHAAGHYAQRLFPGMRVKYVSTEEFTNDFINSLRDDRKVAFKRRYRETDILLVDDIQFIEGKEGIQEEFFHTFNTLHNANKQIVVSSDRPPKQLATLEERLRTRFEWGLITDVQPPELETRIAILSKKARMDRLDVPHDVL…	548	20	0	0.9189	/data/input/nr_20241120.dmnd	chromosomal replication initiator protein DnaA [Rhodococcus pyridinivorans]	Rhodococcus pyridinivorans	0	571	582	1	571	1	548	503	0.8643	1.0193	1.062	1	0		MCR8693155	894	EME64455.1 chromosomal replication initiation protein [Rhodococcus ruber BKS 20-38]/MULTISPECIES: chromosomal replication initiator protein DnaA [Rhodococcus]/KOS58081.1 chromosomal replication initiator protein DnaA [Rhodococcus rhodochrous KG-21]	Rhodococcus rhodochrous KG-21/Rhodococcus/Rhodococcus ruber BKS 20-38	0	548	548	1	548	1	548	548	1	1	1	1	0		WP_003936646;WP_003936646;WP_003936646	1059	dnaA	1441923	WP_003936646
ENBDON_00001	MULTISPECIES: chromosomal replication initiator protein DnaA	VTDEPNALADVWPDVVAELTADGEGLSKGQKAWLALVKPITLAQGFALLSVPSSFAQEAIERDLREPILRALHRTLGHRVEGLGVRIEPSATVDDPAEDPYAVPRDTLPLEGLPPDPRSPEPHSFDTRPIVAGPPESRPRESERHDMAHPFRRRRPSSLDHGMLEVDTGELEEVDDDREAMTAVRESWPSYFTQPPPPATASPTGSSSLNAKYTFDTFVIGASNRFAHAAAVAIAEAPARAYNPLFIWGASGLGKTHLLHAAGHYAQRLFPGMRVKYVSTEEFTNDFINSLRDDRKVAFKRRYRETDILLVDDIQFIEGKEGIQEEFFHTFNTLHNANKQIVVSSDRPPKQLATLEERLRTRFEWGLITDVQPPELETRIAILSKKARMDRLDVPHDVL…	548	20	0	0.9189	/data/input/nr_20241120.dmnd																			EME64455.1 chromosomal replication initiation protein [Rhodococcus ruber BKS 20-38]/MULTISPECIES: chromosomal replication initiator protein DnaA [Rhodococcus]/KOS58081.1 chromosomal replication initiator protein DnaA [Rhodococcus rhodochrous KG-21]	Rhodococcus rhodochrous KG-21/Rhodococcus/Rhodococcus ruber BKS 20-38	0	548	548	1	548	1	548	548	1	1	1	1	0		WP_003936646;WP_003936646;WP_003936646	1059	dnaA	1441923	WP_003936646
ENBDON_00001	MULTISPECIES: chromosomal replication initiator protein DnaA	VTDEPNALADVWPDVVAELTADGEGLSKGQKAWLALVKPITLAQGFALLSVPSSFAQEAIERDLREPILRALHRTLGHRVEGLGVRIEPSATVDDPAEDPYAVPRDTLPLEGLPPDPRSPEPHSFDTRPIVAGPPESRPRESERHDMAHPFRRRRPSSLDHGMLEVDTGELEEVDDDREAMTAVRESWPSYFTQPPPPATASPTGSSSLNAKYTFDTFVIGASNRFAHAAAVAIAEAPARAYNPLFIWGASGLGKTHLLHAAGHYAQRLFPGMRVKYVSTEEFTNDFINSLRDDRKVAFKRRYRETDILLVDDIQFIEGKEGIQEEFFHTFNTLHNANKQIVVSSDRPPKQLATLEERLRTRFEWGLITDVQPPELETRIAILSKKARMDRLDVPHDVL…	548	20	0	0.9189	/data/input/nr_20241120.dmnd																			EME64455.1 chromosomal replication initiation protein [Rhodococcus ruber BKS 20-38]/MULTISPECIES: chromosomal replication initiator protein DnaA [Rhodococcus]/KOS58081.1 chromosomal replication initiator protein DnaA [Rhodococcus rhodochrous KG-21]	Rhodococcus rhodochrous KG-21/Rhodococcus/Rhodococcus ruber BKS 20-38	0	548	548	1	548	1	548	548	1	1	1	1	0		WP_003936646;WP_003936646;WP_003936646	1059	dnaA	1830	WP_017681018
ENBDON_00001	MULTISPECIES: chromosomal replication initiator protein DnaA	VTDEPNALADVWPDVVAELTADGEGLSKGQKAWLALVKPITLAQGFALLSVPSSFAQEAIERDLREPILRALHRTLGHRVEGLGVRIEPSATVDDPAEDPYAVPRDTLPLEGLPPDPRSPEPHSFDTRPIVAGPPESRPRESERHDMAHPFRRRRPSSLDHGMLEVDTGELEEVDDDREAMTAVRESWPSYFTQPPPPATASPTGSSSLNAKYTFDTFVIGASNRFAHAAAVAIAEAPARAYNPLFIWGASGLGKTHLLHAAGHYAQRLFPGMRVKYVSTEEFTNDFINSLRDDRKVAFKRRYRETDILLVDDIQFIEGKEGIQEEFFHTFNTLHNANKQIVVSSDRPPKQLATLEERLRTRFEWGLITDVQPPELETRIAILSKKARMDRLDVPHDVL…	548	20	0	0.9189	/data/input/nr_20241120.dmnd																			EME64455.1 chromosomal replication initiation protein [Rhodococcus ruber BKS 20-38]/MULTISPECIES: chromosomal replication initiator protein DnaA [Rhodococcus]/KOS58081.1 chromosomal replication initiator protein DnaA [Rhodococcus rhodochrous KG-21]	Rhodococcus rhodochrous KG-21/Rhodococcus/Rhodococcus ruber BKS 20-38	0	548	548	1	548	1	548	548	1	1	1	1	0		WP_003936646;WP_003936646;WP_003936646	1059	dnaA	1830	WP_017681018
ENBDON_00001	MULTISPECIES: chromosomal replication initiator protein DnaA	VTDEPNALADVWPDVVAELTADGEGLSKGQKAWLALVKPITLAQGFALLSVPSSFAQEAIERDLREPILRALHRTLGHRVEGLGVRIEPSATVDDPAEDPYAVPRDTLPLEGLPPDPRSPEPHSFDTRPIVAGPPESRPRESERHDMAHPFRRRRPSSLDHGMLEVDTGELEEVDDDREAMTAVRESWPSYFTQPPPPATASPTGSSSLNAKYTFDTFVIGASNRFAHAAAVAIAEAPARAYNPLFIWGASGLGKTHLLHAAGHYAQRLFPGMRVKYVSTEEFTNDFINSLRDDRKVAFKRRYRETDILLVDDIQFIEGKEGIQEEFFHTFNTLHNANKQIVVSSDRPPKQLATLEERLRTRFEWGLITDVQPPELETRIAILSKKARMDRLDVPHDVL…	548	20	0	0.9189	/data/input/nr_20241120.dmnd																			EME64455.1 chromosomal replication initiation protein [Rhodococcus ruber BKS 20-38]/MULTISPECIES: chromosomal replication initiator protein DnaA [Rhodococcus]/KOS58081.1 chromosomal replication initiator protein DnaA [Rhodococcus rhodochrous KG-21]	Rhodococcus rhodochrous KG-21/Rhodococcus/Rhodococcus ruber BKS 20-38	0	548	548	1	548	1	548	548	1	1	1	1	0		WP_003936646;WP_003936646;WP_003936646	1059	dnaA	1830	WP_017681018
ENBDON_00001	MULTISPECIES: chromosomal replication initiator protein DnaA	VTDEPNALADVWPDVVAELTADGEGLSKGQKAWLALVKPITLAQGFALLSVPSSFAQEAIERDLREPILRALHRTLGHRVEGLGVRIEPSATVDDPAEDPYAVPRDTLPLEGLPPDPRSPEPHSFDTRPIVAGPPESRPRESERHDMAHPFRRRRPSSLDHGMLEVDTGELEEVDDDREAMTAVRESWPSYFTQPPPPATASPTGSSSLNAKYTFDTFVIGASNRFAHAAAVAIAEAPARAYNPLFIWGASGLGKTHLLHAAGHYAQRLFPGMRVKYVSTEEFTNDFINSLRDDRKVAFKRRYRETDILLVDDIQFIEGKEGIQEEFFHTFNTLHNANKQIVVSSDRPPKQLATLEERLRTRFEWGLITDVQPPELETRIAILSKKARMDRLDVPHDVL…	548	20	0	0.9189	/data/input/nr_20241120.dmnd																			EME64455.1 chromosomal replication initiation protein [Rhodococcus ruber BKS 20-38]/MULTISPECIES: chromosomal replication initiator protein DnaA [Rhodococcus]/KOS58081.1 chromosomal replication initiator protein DnaA [Rhodococcus rhodochrous KG-21]	Rhodococcus rhodochrous KG-21/Rhodococcus/Rhodococcus ruber BKS 20-38	0	548	548	1	548	1	548	548	1	1	1	1	0		WP_003936646;WP_003936646;WP_003936646	1059	dnaA	1278076	WP_003936646
ENBDON_00001	MULTISPECIES: chromosomal replication initiator protein DnaA	VTDEPNALADVWPDVVAELTADGEGLSKGQKAWLALVKPITLAQGFALLSVPSSFAQEAIERDLREPILRALHRTLGHRVEGLGVRIEPSATVDDPAEDPYAVPRDTLPLEGLPPDPRSPEPHSFDTRPIVAGPPESRPRESERHDMAHPFRRRRPSSLDHGMLEVDTGELEEVDDDREAMTAVRESWPSYFTQPPPPATASPTGSSSLNAKYTFDTFVIGASNRFAHAAAVAIAEAPARAYNPLFIWGASGLGKTHLLHAAGHYAQRLFPGMRVKYVSTEEFTNDFINSLRDDRKVAFKRRYRETDILLVDDIQFIEGKEGIQEEFFHTFNTLHNANKQIVVSSDRPPKQLATLEERLRTRFEWGLITDVQPPELETRIAILSKKARMDRLDVPHDVL…	548	20	0	0.9189	/data/input/nr_20241120.dmnd																			EME64455.1 chromosomal replication initiation protein [Rhodococcus ruber BKS 20-38]/MULTISPECIES: chromosomal replication initiator protein DnaA [Rhodococcus]/KOS58081.1 chromosomal replication initiator protein DnaA [Rhodococcus rhodochrous KG-21]	Rhodococcus rhodochrous KG-21/Rhodococcus/Rhodococcus ruber BKS 20-38	0	548	548	1	548	1	548	548	1	1	1	1	0		WP_003936646;WP_003936646;WP_003936646	1059	dnaA	191292	WP_044475805
ENBDON_00001	MULTISPECIES: chromosomal replication initiator protein DnaA	VTDEPNALADVWPDVVAELTADGEGLSKGQKAWLALVKPITLAQGFALLSVPSSFAQEAIERDLREPILRALHRTLGHRVEGLGVRIEPSATVDDPAEDPYAVPRDTLPLEGLPPDPRSPEPHSFDTRPIVAGPPESRPRESERHDMAHPFRRRRPSSLDHGMLEVDTGELEEVDDDREAMTAVRESWPSYFTQPPPPATASPTGSSSLNAKYTFDTFVIGASNRFAHAAAVAIAEAPARAYNPLFIWGASGLGKTHLLHAAGHYAQRLFPGMRVKYVSTEEFTNDFINSLRDDRKVAFKRRYRETDILLVDDIQFIEGKEGIQEEFFHTFNTLHNANKQIVVSSDRPPKQLATLEERLRTRFEWGLITDVQPPELETRIAILSKKARMDRLDVPHDVL…	548	20	0	0.9189	/data/input/nr_20241120.dmnd																			EME64455.1 chromosomal replication initiation protein [Rhodococcus ruber BKS 20-38]/MULTISPECIES: chromosomal replication initiator protein DnaA [Rhodococcus]/KOS58081.1 chromosomal replication initiator protein DnaA [Rhodococcus rhodochrous KG-21]	Rhodococcus rhodochrous KG-21/Rhodococcus/Rhodococcus ruber BKS 20-38	0	548	548	1	548	1	548	548	1	1	1	1	0		WP_003936646;WP_003936646;WP_003936646	1059	dnaA	191292	WP_044475805
ENBDON_00001	MULTISPECIES: chromosomal replication initiator protein DnaA	VTDEPNALADVWPDVVAELTADGEGLSKGQKAWLALVKPITLAQGFALLSVPSSFAQEAIERDLREPILRALHRTLGHRVEGLGVRIEPSATVDDPAEDPYAVPRDTLPLEGLPPDPRSPEPHSFDTRPIVAGPPESRPRESERHDMAHPFRRRRPSSLDHGMLEVDTGELEEVDDDREAMTAVRESWPSYFTQPPPPATASPTGSSSLNAKYTFDTFVIGASNRFAHAAAVAIAEAPARAYNPLFIWGASGLGKTHLLHAAGHYAQRLFPGMRVKYVSTEEFTNDFINSLRDDRKVAFKRRYRETDILLVDDIQFIEGKEGIQEEFFHTFNTLHNANKQIVVSSDRPPKQLATLEERLRTRFEWGLITDVQPPELETRIAILSKKARMDRLDVPHDVL…	548	20	0	0.9189	/data/input/nr_20241120.dmnd																			EME64455.1 chromosomal replication initiation protein [Rhodococcus ruber BKS 20-38]/MULTISPECIES: chromosomal replication initiator protein DnaA [Rhodococcus]/KOS58081.1 chromosomal replication initiator protein DnaA [Rhodococcus rhodochrous KG-21]	Rhodococcus rhodochrous KG-21/Rhodococcus/Rhodococcus ruber BKS 20-38	0	548	548	1	548	1	548	548	1	1	1	1	0		WP_003936646;WP_003936646;WP_003936646	1059	dnaA	191292	WP_044475805
ENBDON_00001	MULTISPECIES: chromosomal replication initiator protein DnaA	VTDEPNALADVWPDVVAELTADGEGLSKGQKAWLALVKPITLAQGFALLSVPSSFAQEAIERDLREPILRALHRTLGHRVEGLGVRIEPSATVDDPAEDPYAVPRDTLPLEGLPPDPRSPEPHSFDTRPIVAGPPESRPRESERHDMAHPFRRRRPSSLDHGMLEVDTGELEEVDDDREAMTAVRESWPSYFTQPPPPATASPTGSSSLNAKYTFDTFVIGASNRFAHAAAVAIAEAPARAYNPLFIWGASGLGKTHLLHAAGHYAQRLFPGMRVKYVSTEEFTNDFINSLRDDRKVAFKRRYRETDILLVDDIQFIEGKEGIQEEFFHTFNTLHNANKQIVVSSDRPPKQLATLEERLRTRFEWGLITDVQPPELETRIAILSKKARMDRLDVPHDVL…	548	20	0	0.9189	/data/input/nr_20241120.dmnd																			EME64455.1 chromosomal replication initiation protein [Rhodococcus ruber BKS 20-38]/MULTISPECIES: chromosomal replication initiator protein DnaA [Rhodococcus]/KOS58081.1 chromosomal replication initiator protein DnaA [Rhodococcus rhodochrous KG-21]	Rhodococcus rhodochrous KG-21/Rhodococcus/Rhodococcus ruber BKS 20-38	0	548	548	1	548	1	548	548	1	1	1	1	0		WP_003936646;WP_003936646;WP_003936646	1059	dnaA	1278076	WP_003936646
ENBDON_00001	MULTISPECIES: chromosomal replication initiator protein DnaA	VTDEPNALADVWPDVVAELTADGEGLSKGQKAWLALVKPITLAQGFALLSVPSSFAQEAIERDLREPILRALHRTLGHRVEGLGVRIEPSATVDDPAEDPYAVPRDTLPLEGLPPDPRSPEPHSFDTRPIVAGPPESRPRESERHDMAHPFRRRRPSSLDHGMLEVDTGELEEVDDDREAMTAVRESWPSYFTQPPPPATASPTGSSSLNAKYTFDTFVIGASNRFAHAAAVAIAEAPARAYNPLFIWGASGLGKTHLLHAAGHYAQRLFPGMRVKYVSTEEFTNDFINSLRDDRKVAFKRRYRETDILLVDDIQFIEGKEGIQEEFFHTFNTLHNANKQIVVSSDRPPKQLATLEERLRTRFEWGLITDVQPPELETRIAILSKKARMDRLDVPHDVL…	548	20	0	0.9189	/data/input/nr_20241120.dmnd																			EME64455.1 chromosomal replication initiation protein [Rhodococcus ruber BKS 20-38]/MULTISPECIES: chromosomal replication initiator protein DnaA [Rhodococcus]/KOS58081.1 chromosomal replication initiator protein DnaA [Rhodococcus rhodochrous KG-21]	Rhodococcus rhodochrous KG-21/Rhodococcus/Rhodococcus ruber BKS 20-38	0	548	548	1	548	1	548	548	1	1	1	1	0		WP_003936646;WP_003936646;WP_003936646	1059	dnaA	1830	WP_017681018
ENBDON_00001	MULTISPECIES: chromosomal replication initiator protein DnaA	VTDEPNALADVWPDVVAELTADGEGLSKGQKAWLALVKPITLAQGFALLSVPSSFAQEAIERDLREPILRALHRTLGHRVEGLGVRIEPSATVDDPAEDPYAVPRDTLPLEGLPPDPRSPEPHSFDTRPIVAGPPESRPRESERHDMAHPFRRRRPSSLDHGMLEVDTGELEEVDDDREAMTAVRESWPSYFTQPPPPATASPTGSSSLNAKYTFDTFVIGASNRFAHAAAVAIAEAPARAYNPLFIWGASGLGKTHLLHAAGHYAQRLFPGMRVKYVSTEEFTNDFINSLRDDRKVAFKRRYRETDILLVDDIQFIEGKEGIQEEFFHTFNTLHNANKQIVVSSDRPPKQLATLEERLRTRFEWGLITDVQPPELETRIAILSKKARMDRLDVPHDVL…	548	20	0	0.9189	/data/input/nr_20241120.dmnd																			EME64455.1 chromosomal replication initiation protein [Rhodococcus ruber BKS 20-38]/MULTISPECIES: chromosomal replication initiator protein DnaA [Rhodococcus]/KOS58081.1 chromosomal replication initiator protein DnaA [Rhodococcus rhodochrous KG-21]	Rhodococcus rhodochrous KG-21/Rhodococcus/Rhodococcus ruber BKS 20-38	0	548	548	1	548	1	548	548	1	1	1	1	0		WP_003936646;WP_003936646;WP_003936646	1059	dnaA	1441923	WP_003936646
ENBDON_00001	MULTISPECIES: chromosomal replication initiator protein DnaA	VTDEPNALADVWPDVVAELTADGEGLSKGQKAWLALVKPITLAQGFALLSVPSSFAQEAIERDLREPILRALHRTLGHRVEGLGVRIEPSATVDDPAEDPYAVPRDTLPLEGLPPDPRSPEPHSFDTRPIVAGPPESRPRESERHDMAHPFRRRRPSSLDHGMLEVDTGELEEVDDDREAMTAVRESWPSYFTQPPPPATASPTGSSSLNAKYTFDTFVIGASNRFAHAAAVAIAEAPARAYNPLFIWGASGLGKTHLLHAAGHYAQRLFPGMRVKYVSTEEFTNDFINSLRDDRKVAFKRRYRETDILLVDDIQFIEGKEGIQEEFFHTFNTLHNANKQIVVSSDRPPKQLATLEERLRTRFEWGLITDVQPPELETRIAILSKKARMDRLDVPHDVL…	548	20	0	0.9189	/data/input/nr_20241120.dmnd																			EME64455.1 chromosomal replication initiation protein [Rhodococcus ruber BKS 20-38]/MULTISPECIES: chromosomal replication initiator protein DnaA [Rhodococcus]/KOS58081.1 chromosomal replication initiator protein DnaA [Rhodococcus rhodochrous KG-21]	Rhodococcus rhodochrous KG-21/Rhodococcus/Rhodococcus ruber BKS 20-38	0	548	548	1	548	1	548	548	1	1	1	1	0		WP_003936646;WP_003936646;WP_003936646	1059	dnaA	1830	WP_017681018
ENBDON_00001	MULTISPECIES: chromosomal replication initiator protein DnaA	VTDEPNALADVWPDVVAELTADGEGLSKGQKAWLALVKPITLAQGFALLSVPSSFAQEAIERDLREPILRALHRTLGHRVEGLGVRIEPSATVDDPAEDPYAVPRDTLPLEGLPPDPRSPEPHSFDTRPIVAGPPESRPRESERHDMAHPFRRRRPSSLDHGMLEVDTGELEEVDDDREAMTAVRESWPSYFTQPPPPATASPTGSSSLNAKYTFDTFVIGASNRFAHAAAVAIAEAPARAYNPLFIWGASGLGKTHLLHAAGHYAQRLFPGMRVKYVSTEEFTNDFINSLRDDRKVAFKRRYRETDILLVDDIQFIEGKEGIQEEFFHTFNTLHNANKQIVVSSDRPPKQLATLEERLRTRFEWGLITDVQPPELETRIAILSKKARMDRLDVPHDVL…	548	20	0	0.9189	/data/input/nr_20241120.dmnd																			EME64455.1 chromosomal replication initiation protein [Rhodococcus ruber BKS 20-38]/MULTISPECIES: chromosomal replication initiator protein DnaA [Rhodococcus]/KOS58081.1 chromosomal replication initiator protein DnaA [Rhodococcus rhodochrous KG-21]	Rhodococcus rhodochrous KG-21/Rhodococcus/Rhodococcus ruber BKS 20-38	0	548	548	1	548	1	548	548	1	1	1	1	0		WP_003936646;WP_003936646;WP_003936646	1059	dnaA	1441923	WP_003936646
ENBDON_00001	MULTISPECIES: chromosomal replication initiator protein DnaA	VTDEPNALADVWPDVVAELTADGEGLSKGQKAWLALVKPITLAQGFALLSVPSSFAQEAIERDLREPILRALHRTLGHRVEGLGVRIEPSATVDDPAEDPYAVPRDTLPLEGLPPDPRSPEPHSFDTRPIVAGPPESRPRESERHDMAHPFRRRRPSSLDHGMLEVDTGELEEVDDDREAMTAVRESWPSYFTQPPPPATASPTGSSSLNAKYTFDTFVIGASNRFAHAAAVAIAEAPARAYNPLFIWGASGLGKTHLLHAAGHYAQRLFPGMRVKYVSTEEFTNDFINSLRDDRKVAFKRRYRETDILLVDDIQFIEGKEGIQEEFFHTFNTLHNANKQIVVSSDRPPKQLATLEERLRTRFEWGLITDVQPPELETRIAILSKKARMDRLDVPHDVL…	548	20	0	0.9189	/data/input/nr_20241120.dmnd																			EME64455.1 chromosomal replication initiation protein [Rhodococcus ruber BKS 20-38]/MULTISPECIES: chromosomal replication initiator protein DnaA [Rhodococcus]/KOS58081.1 chromosomal replication initiator protein DnaA [Rhodococcus rhodochrous KG-21]	Rhodococcus rhodochrous KG-21/Rhodococcus/Rhodococcus ruber BKS 20-38	0	548	548	1	548	1	548	548	1	1	1	1	0		WP_003936646;WP_003936646;WP_003936646	1059	dnaA	1441923	WP_003936646
ENBDON_00001	MULTISPECIES: chromosomal replication initiator protein DnaA	VTDEPNALADVWPDVVAELTADGEGLSKGQKAWLALVKPITLAQGFALLSVPSSFAQEAIERDLREPILRALHRTLGHRVEGLGVRIEPSATVDDPAEDPYAVPRDTLPLEGLPPDPRSPEPHSFDTRPIVAGPPESRPRESERHDMAHPFRRRRPSSLDHGMLEVDTGELEEVDDDREAMTAVRESWPSYFTQPPPPATASPTGSSSLNAKYTFDTFVIGASNRFAHAAAVAIAEAPARAYNPLFIWGASGLGKTHLLHAAGHYAQRLFPGMRVKYVSTEEFTNDFINSLRDDRKVAFKRRYRETDILLVDDIQFIEGKEGIQEEFFHTFNTLHNANKQIVVSSDRPPKQLATLEERLRTRFEWGLITDVQPPELETRIAILSKKARMDRLDVPHDVL…	548	20	0	0.9189	/data/input/nr_20241120.dmnd																			EME64455.1 chromosomal replication initiation protein [Rhodococcus ruber BKS 20-38]/MULTISPECIES: chromosomal replication initiator protein DnaA [Rhodococcus]/KOS58081.1 chromosomal replication initiator protein DnaA [Rhodococcus rhodochrous KG-21]	Rhodococcus rhodochrous KG-21/Rhodococcus/Rhodococcus ruber BKS 20-38	0	548	548	1	548	1	548	548	1	1	1	1	0		WP_003936646;WP_003936646;WP_003936646	1059	dnaA	1278076	WP_003936646
ENBDON_00001	MULTISPECIES: chromosomal replication initiator protein DnaA	VTDEPNALADVWPDVVAELTADGEGLSKGQKAWLALVKPITLAQGFALLSVPSSFAQEAIERDLREPILRALHRTLGHRVEGLGVRIEPSATVDDPAEDPYAVPRDTLPLEGLPPDPRSPEPHSFDTRPIVAGPPESRPRESERHDMAHPFRRRRPSSLDHGMLEVDTGELEEVDDDREAMTAVRESWPSYFTQPPPPATASPTGSSSLNAKYTFDTFVIGASNRFAHAAAVAIAEAPARAYNPLFIWGASGLGKTHLLHAAGHYAQRLFPGMRVKYVSTEEFTNDFINSLRDDRKVAFKRRYRETDILLVDDIQFIEGKEGIQEEFFHTFNTLHNANKQIVVSSDRPPKQLATLEERLRTRFEWGLITDVQPPELETRIAILSKKARMDRLDVPHDVL…	548	20	0	0.9189	/data/input/nr_20241120.dmnd																			EME64455.1 chromosomal replication initiation protein [Rhodococcus ruber BKS 20-38]/MULTISPECIES: chromosomal replication initiator protein DnaA [Rhodococcus]/KOS58081.1 chromosomal replication initiator protein DnaA [Rhodococcus rhodochrous KG-21]	Rhodococcus rhodochrous KG-21/Rhodococcus/Rhodococcus ruber BKS 20-38	0	548	548	1	548	1	548	548	1	1	1	1	0		WP_003936646;WP_003936646;WP_003936646	1059	dnaA	1441923	WP_003936646
ENBDON_00002	MULTISPECIES: DNA polymerase III subunit beta	MKFRVAREDFADSVAWVARSLPSRPPVPVLGGVLLGADDQGLTVSGFDYEVSAQVHVSAEVITSGQVLVSGRLLADITRALPNKPVDVVLDGTRVLINCGSAKFSLPTMPVEDYPQLPELPQQTGSLPVEMFAEAISQVAVAAGKDDTLPMLTGIRVEIDGTHMVLAATDRFRLAVRKIEWMPTVESASAAVLVPAKTLSESAKTVGGSSNSPVQLALGAGSSVGAEGLLGIVADGRRTTTRLLDAEFPKFRQLLPTEHTAMATVEIAPLVDAIKRVALVAERGAQVRLEFTEGGLLLSAGGDDAGRAEESLAAEFQGEPLIIAFNPGYLLDGLGSLHSEKVSFGFTTPSRPAVLRPALEEAPEPDASGTFAAPDSDYTYLLMPVRLPG	389	20	3.4e-256	0.9649	/data/input/nr_20241120.dmnd	MULTISPECIES: DNA polymerase III subunit beta [Rhodococcus]/EME64454.1 DNA polymerase III subunit beta [Rhodococcus ruber BKS 20-38]/KOS58082.1 DNA polymerase III subunit beta [Rhodococcus rhodochrous KG-21]/MDM7489159.1 DNA polymerase III subunit beta [Rhodococcus indonesiensis]	Rhodococcus/Rhodococcus ruber BKS 20-38/Rhodococcus rhodochrous KG-21/Rhodococcus indonesiensis	3.4e-256	394	389	6	394	1	389	389	1	0.9873	1	1	0		WP_003936645/WP_003936645/WP_003936645/WP_003936645	709	KOS58082.1 DNA polymerase III subunit beta [Rhodococcus rhodochrous KG-21]/MULTISPECIES: DNA polymerase III subunit beta [Rhodococcus]/MDM7489159.1 DNA polymerase III subunit beta [Rhodococcus indonesiensis]/EME64454.1 DNA polymerase III subunit beta [Rhodococcus ruber BKS 20-38]	Rhodococcus rhodochrous KG-21/Rhodococcus/Rhodococcus indonesiensis/Rhodococcus ruber BKS 20-38	3.4e-256	394	389	6	394	1	389	389	1	0.9873	1	1	0		WP_003936645;WP_003936645;WP_003936645;WP_003936645	709	dnaN	1830	CDZ89948		GO:0003677-IEA	DNA binding-IEA
ENBDON_00002	MULTISPECIES: DNA polymerase III subunit beta	MKFRVAREDFADSVAWVARSLPSRPPVPVLGGVLLGADDQGLTVSGFDYEVSAQVHVSAEVITSGQVLVSGRLLADITRALPNKPVDVVLDGTRVLINCGSAKFSLPTMPVEDYPQLPELPQQTGSLPVEMFAEAISQVAVAAGKDDTLPMLTGIRVEIDGTHMVLAATDRFRLAVRKIEWMPTVESASAAVLVPAKTLSESAKTVGGSSNSPVQLALGAGSSVGAEGLLGIVADGRRTTTRLLDAEFPKFRQLLPTEHTAMATVEIAPLVDAIKRVALVAERGAQVRLEFTEGGLLLSAGGDDAGRAEESLAAEFQGEPLIIAFNPGYLLDGLGSLHSEKVSFGFTTPSRPAVLRPALEEAPEPDASGTFAAPDSDYTYLLMPVRLPG	389	20	3.4e-256	0.9649	/data/input/nr_20241120.dmnd	DNA polymerase-3 subunit beta [Rhodococcus ruber]	Rhodococcus ruber	9.4e-255	389	389	1	389	1	389	389	1	1	1	1	0		MBP2214166	705	KOS58082.1 DNA polymerase III subunit beta [Rhodococcus rhodochrous KG-21]/MULTISPECIES: DNA polymerase III subunit beta [Rhodococcus]/MDM7489159.1 DNA polymerase III subunit beta [Rhodococcus indonesiensis]/EME64454.1 DNA polymerase III subunit beta [Rhodococcus ruber BKS 20-38]	Rhodococcus rhodochrous KG-21/Rhodococcus/Rhodococcus indonesiensis/Rhodococcus ruber BKS 20-38	3.4e-256	394	389	6	394	1	389	389	1	0.9873	1	1	0		WP_003936645;WP_003936645;WP_003936645;WP_003936645	709	G352_12764	1278076	WP_003936645		GO:0006260-IEA	DNA replication-IEA
ENBDON_00002	MULTISPECIES: DNA polymerase III subunit beta	MKFRVAREDFADSVAWVARSLPSRPPVPVLGGVLLGADDQGLTVSGFDYEVSAQVHVSAEVITSGQVLVSGRLLADITRALPNKPVDVVLDGTRVLINCGSAKFSLPTMPVEDYPQLPELPQQTGSLPVEMFAEAISQVAVAAGKDDTLPMLTGIRVEIDGTHMVLAATDRFRLAVRKIEWMPTVESASAAVLVPAKTLSESAKTVGGSSNSPVQLALGAGSSVGAEGLLGIVADGRRTTTRLLDAEFPKFRQLLPTEHTAMATVEIAPLVDAIKRVALVAERGAQVRLEFTEGGLLLSAGGDDAGRAEESLAAEFQGEPLIIAFNPGYLLDGLGSLHSEKVSFGFTTPSRPAVLRPALEEAPEPDASGTFAAPDSDYTYLLMPVRLPG	389	20	3.4e-256	0.9649	/data/input/nr_20241120.dmnd	MULTISPECIES: DNA polymerase III subunit beta [Rhodococcus]/MDX5452942.1 DNA polymerase III subunit beta [Rhodococcus sp. (in: high G+C Gram-positive bacteria)]/RIK10858.1 MAG: DNA polymerase III subunit beta [Acidobacteriota bacterium]/ATQ30110.1 DNA polymerase III subunit beta [Rhodococcus ruber]/AWG97086.1 DNA polymerase III subunit beta [Rhodococcus ruber]/AXY49462.1 DNA polymerase III subuni…	Rhodococcus/Rhodococcus sp. (in: high G+C Gram-positive bacteria)/Acidobacteriota bacterium/Rhodococcus ruber/Rhodococcus ruber/Rhodococcus ruber	1.1e-254	394	389	6	394	1	389	389	1	0.9873	1	1	0		WP_010595441/WP_010595441/WP_010595441/WP_010595441	705	KOS58082.1 DNA polymerase III subunit beta [Rhodococcus rhodochrous KG-21]/MULTISPECIES: DNA polymerase III subunit beta [Rhodococcus]/MDM7489159.1 DNA polymerase III subunit beta [Rhodococcus indonesiensis]/EME64454.1 DNA polymerase III subunit beta [Rhodococcus ruber BKS 20-38]	Rhodococcus rhodochrous KG-21/Rhodococcus/Rhodococcus indonesiensis/Rhodococcus ruber BKS 20-38	3.4e-256	394	389	6	394	1	389	389	1	0.9873	1	1	0		WP_003936645;WP_003936645;WP_003936645;WP_003936645	709	Z051_00415	1441923	WP_003936645		GO:0003887-IEA	DNA-directed DNA polymerase activity-IEA
ENBDON_00002	MULTISPECIES: DNA polymerase III subunit beta	MKFRVAREDFADSVAWVARSLPSRPPVPVLGGVLLGADDQGLTVSGFDYEVSAQVHVSAEVITSGQVLVSGRLLADITRALPNKPVDVVLDGTRVLINCGSAKFSLPTMPVEDYPQLPELPQQTGSLPVEMFAEAISQVAVAAGKDDTLPMLTGIRVEIDGTHMVLAATDRFRLAVRKIEWMPTVESASAAVLVPAKTLSESAKTVGGSSNSPVQLALGAGSSVGAEGLLGIVADGRRTTTRLLDAEFPKFRQLLPTEHTAMATVEIAPLVDAIKRVALVAERGAQVRLEFTEGGLLLSAGGDDAGRAEESLAAEFQGEPLIIAFNPGYLLDGLGSLHSEKVSFGFTTPSRPAVLRPALEEAPEPDASGTFAAPDSDYTYLLMPVRLPG	389	20	3.4e-256	0.9649	/data/input/nr_20241120.dmnd	MULTISPECIES: DNA polymerase III subunit beta [Rhodococcus]/AUM19131.1 DNA polymerase III subunit beta [Rhodococcus ruber]/MBD8055136.1 DNA polymerase III subunit beta [Rhodococcus ruber]	Rhodococcus/Rhodococcus ruber/Rhodococcus ruber	4.6e-254	394	389	6	394	1	389	388	0.9974	0.9873	1	1	0		WP_102031791/WP_102031791	704	KOS58082.1 DNA polymerase III subunit beta [Rhodococcus rhodochrous KG-21]/MULTISPECIES: DNA polymerase III subunit beta [Rhodococcus]/MDM7489159.1 DNA polymerase III subunit beta [Rhodococcus indonesiensis]/EME64454.1 DNA polymerase III subunit beta [Rhodococcus ruber BKS 20-38]	Rhodococcus rhodochrous KG-21/Rhodococcus/Rhodococcus indonesiensis/Rhodococcus ruber BKS 20-38	3.4e-256	394	389	6	394	1	389	389	1	0.9873	1	1	0		WP_003936645;WP_003936645;WP_003936645;WP_003936645	709	dnaN	191292	WP_044475806		GO:0006271-IEA	DNA strand elongation involved in DNA replication-IEA
ENBDON_00002	MULTISPECIES: DNA polymerase III subunit beta	MKFRVAREDFADSVAWVARSLPSRPPVPVLGGVLLGADDQGLTVSGFDYEVSAQVHVSAEVITSGQVLVSGRLLADITRALPNKPVDVVLDGTRVLINCGSAKFSLPTMPVEDYPQLPELPQQTGSLPVEMFAEAISQVAVAAGKDDTLPMLTGIRVEIDGTHMVLAATDRFRLAVRKIEWMPTVESASAAVLVPAKTLSESAKTVGGSSNSPVQLALGAGSSVGAEGLLGIVADGRRTTTRLLDAEFPKFRQLLPTEHTAMATVEIAPLVDAIKRVALVAERGAQVRLEFTEGGLLLSAGGDDAGRAEESLAAEFQGEPLIIAFNPGYLLDGLGSLHSEKVSFGFTTPSRPAVLRPALEEAPEPDASGTFAAPDSDYTYLLMPVRLPG	389	20	3.4e-256	0.9649	/data/input/nr_20241120.dmnd	DNA polymerase III subunit beta [Rhodococcus ruber]	Rhodococcus ruber	1.1e-253	455	389	67	455	1	389	389	1	0.8549	1	1	0		CDZ89948	705	KOS58082.1 DNA polymerase III subunit beta [Rhodococcus rhodochrous KG-21]/MULTISPECIES: DNA polymerase III subunit beta [Rhodococcus]/MDM7489159.1 DNA polymerase III subunit beta [Rhodococcus indonesiensis]/EME64454.1 DNA polymerase III subunit beta [Rhodococcus ruber BKS 20-38]	Rhodococcus rhodochrous KG-21/Rhodococcus/Rhodococcus indonesiensis/Rhodococcus ruber BKS 20-38	3.4e-256	394	389	6	394	1	389	389	1	0.9873	1	1	0		WP_003936645;WP_003936645;WP_003936645;WP_003936645	709	Z051_00415	1441923	WP_003936645		GO:0005737-IEA	cytoplasm-IEA
ENBDON_00002	MULTISPECIES: DNA polymerase III subunit beta	MKFRVAREDFADSVAWVARSLPSRPPVPVLGGVLLGADDQGLTVSGFDYEVSAQVHVSAEVITSGQVLVSGRLLADITRALPNKPVDVVLDGTRVLINCGSAKFSLPTMPVEDYPQLPELPQQTGSLPVEMFAEAISQVAVAAGKDDTLPMLTGIRVEIDGTHMVLAATDRFRLAVRKIEWMPTVESASAAVLVPAKTLSESAKTVGGSSNSPVQLALGAGSSVGAEGLLGIVADGRRTTTRLLDAEFPKFRQLLPTEHTAMATVEIAPLVDAIKRVALVAERGAQVRLEFTEGGLLLSAGGDDAGRAEESLAAEFQGEPLIIAFNPGYLLDGLGSLHSEKVSFGFTTPSRPAVLRPALEEAPEPDASGTFAAPDSDYTYLLMPVRLPG	389	20	3.4e-256	0.9649	/data/input/nr_20241120.dmnd	DNA polymerase III subunit beta [Rhodococcus ruber]/MDO2379393.1 DNA polymerase III subunit beta [Rhodococcus ruber]	Rhodococcus ruber/Rhodococcus ruber	1.3e-253	394	389	6	394	1	389	388	0.9974	0.9873	1	1	0		WP_304433993	702	KOS58082.1 DNA polymerase III subunit beta [Rhodococcus rhodochrous KG-21]/MULTISPECIES: DNA polymerase III subunit beta [Rhodococcus]/MDM7489159.1 DNA polymerase III subunit beta [Rhodococcus indonesiensis]/EME64454.1 DNA polymerase III subunit beta [Rhodococcus ruber BKS 20-38]	Rhodococcus rhodochrous KG-21/Rhodococcus/Rhodococcus indonesiensis/Rhodococcus ruber BKS 20-38	3.4e-256	394	389	6	394	1	389	389	1	0.9873	1	1	0		WP_003936645;WP_003936645;WP_003936645;WP_003936645	709	dnaN	2722825	WP_044475806		GO:0009360-IEA	DNA polymerase III complex-IEA
ENBDON_00002	MULTISPECIES: DNA polymerase III subunit beta	MKFRVAREDFADSVAWVARSLPSRPPVPVLGGVLLGADDQGLTVSGFDYEVSAQVHVSAEVITSGQVLVSGRLLADITRALPNKPVDVVLDGTRVLINCGSAKFSLPTMPVEDYPQLPELPQQTGSLPVEMFAEAISQVAVAAGKDDTLPMLTGIRVEIDGTHMVLAATDRFRLAVRKIEWMPTVESASAAVLVPAKTLSESAKTVGGSSNSPVQLALGAGSSVGAEGLLGIVADGRRTTTRLLDAEFPKFRQLLPTEHTAMATVEIAPLVDAIKRVALVAERGAQVRLEFTEGGLLLSAGGDDAGRAEESLAAEFQGEPLIIAFNPGYLLDGLGSLHSEKVSFGFTTPSRPAVLRPALEEAPEPDASGTFAAPDSDYTYLLMPVRLPG	389	20	3.4e-256	0.9649	/data/input/nr_20241120.dmnd	Beta sliding clamp [Rhodococcus sp. YH1]/CCW10976.1 DNA polymerase III beta subunit [Rhodococcus aetherivorans]	Rhodococcus sp. YH1/Rhodococcus aetherivorans	1.3e-252	389	389	1	389	1	389	373	0.9589	1	1	1	0		NCL77109/NCL77109	700	KOS58082.1 DNA polymerase III subunit beta [Rhodococcus rhodochrous KG-21]/MULTISPECIES: DNA polymerase III subunit beta [Rhodococcus]/MDM7489159.1 DNA polymerase III subunit beta [Rhodococcus indonesiensis]/EME64454.1 DNA polymerase III subunit beta [Rhodococcus ruber BKS 20-38]	Rhodococcus rhodochrous KG-21/Rhodococcus/Rhodococcus indonesiensis/Rhodococcus ruber BKS 20-38	3.4e-256	394	389	6	394	1	389	389	1	0.9873	1	1	0		WP_003936645;WP_003936645;WP_003936645;WP_003936645	709	Z051_00415	1441923	WP_003936645		GO:0008408-IEA	3'-5' exonuclease activity-IEA
ENBDON_00002	MULTISPECIES: DNA polymerase III subunit beta	MKFRVAREDFADSVAWVARSLPSRPPVPVLGGVLLGADDQGLTVSGFDYEVSAQVHVSAEVITSGQVLVSGRLLADITRALPNKPVDVVLDGTRVLINCGSAKFSLPTMPVEDYPQLPELPQQTGSLPVEMFAEAISQVAVAAGKDDTLPMLTGIRVEIDGTHMVLAATDRFRLAVRKIEWMPTVESASAAVLVPAKTLSESAKTVGGSSNSPVQLALGAGSSVGAEGLLGIVADGRRTTTRLLDAEFPKFRQLLPTEHTAMATVEIAPLVDAIKRVALVAERGAQVRLEFTEGGLLLSAGGDDAGRAEESLAAEFQGEPLIIAFNPGYLLDGLGSLHSEKVSFGFTTPSRPAVLRPALEEAPEPDASGTFAAPDSDYTYLLMPVRLPG	389	20	3.4e-256	0.9649	/data/input/nr_20241120.dmnd	MULTISPECIES: DNA polymerase III subunit beta [Rhodococcus]/QIX48121.1 DNA polymerase III subunit beta [Rhodococcus sp. DMU1]/UYF94428.1 DNA polymerase III subunit beta [Rhodococcus aetherivorans]	Rhodococcus/Rhodococcus sp. DMU1/Rhodococcus aetherivorans	1.5e-252	394	389	6	394	1	389	373	0.9589	0.9873	1	1	0		WP_044475806/WP_044475806/WP_044475806	700	KOS58082.1 DNA polymerase III subunit beta [Rhodococcus rhodochrous KG-21]/MULTISPECIES: DNA polymerase III subunit beta [Rhodococcus]/MDM7489159.1 DNA polymerase III subunit beta [Rhodococcus indonesiensis]/EME64454.1 DNA polymerase III subunit beta [Rhodococcus ruber BKS 20-38]	Rhodococcus rhodochrous KG-21/Rhodococcus/Rhodococcus indonesiensis/Rhodococcus ruber BKS 20-38	3.4e-256	394	389	6	394	1	389	389	1	0.9873	1	1	0		WP_003936645;WP_003936645;WP_003936645;WP_003936645	709	dnaN	1830	CDZ89948		GO:0071897-IEA	DNA biosynthetic process-IEA
ENBDON_00002	MULTISPECIES: DNA polymerase III subunit beta	MKFRVAREDFADSVAWVARSLPSRPPVPVLGGVLLGADDQGLTVSGFDYEVSAQVHVSAEVITSGQVLVSGRLLADITRALPNKPVDVVLDGTRVLINCGSAKFSLPTMPVEDYPQLPELPQQTGSLPVEMFAEAISQVAVAAGKDDTLPMLTGIRVEIDGTHMVLAATDRFRLAVRKIEWMPTVESASAAVLVPAKTLSESAKTVGGSSNSPVQLALGAGSSVGAEGLLGIVADGRRTTTRLLDAEFPKFRQLLPTEHTAMATVEIAPLVDAIKRVALVAERGAQVRLEFTEGGLLLSAGGDDAGRAEESLAAEFQGEPLIIAFNPGYLLDGLGSLHSEKVSFGFTTPSRPAVLRPALEEAPEPDASGTFAAPDSDYTYLLMPVRLPG	389	20	3.4e-256	0.9649	/data/input/nr_20241120.dmnd	DNA polymerase III subunit beta [Rhodococcus sp. M8]/OLL19879.1 DNA polymerase III subunit beta [Rhodococcus sp. M8]/QPG43721.1 DNA polymerase III subunit beta [Rhodococcus sp. M8]	Rhodococcus sp. M8/Rhodococcus sp. M8/Rhodococcus sp. M8	1.5e-252	394	389	6	394	1	389	373	0.9589	0.9873	1	1	0		WP_072633807	700	KOS58082.1 DNA polymerase III subunit beta [Rhodococcus rhodochrous KG-21]/MULTISPECIES: DNA polymerase III subunit beta [Rhodococcus]/MDM7489159.1 DNA polymerase III subunit beta [Rhodococcus indonesiensis]/EME64454.1 DNA polymerase III subunit beta [Rhodococcus ruber BKS 20-38]	Rhodococcus rhodochrous KG-21/Rhodococcus/Rhodococcus indonesiensis/Rhodococcus ruber BKS 20-38	3.4e-256	394	389	6	394	1	389	389	1	0.9873	1	1	0		WP_003936645;WP_003936645;WP_003936645;WP_003936645	709	Z051_00415	1441923	WP_003936645
ENBDON_00002	MULTISPECIES: DNA polymerase III subunit beta	MKFRVAREDFADSVAWVARSLPSRPPVPVLGGVLLGADDQGLTVSGFDYEVSAQVHVSAEVITSGQVLVSGRLLADITRALPNKPVDVVLDGTRVLINCGSAKFSLPTMPVEDYPQLPELPQQTGSLPVEMFAEAISQVAVAAGKDDTLPMLTGIRVEIDGTHMVLAATDRFRLAVRKIEWMPTVESASAAVLVPAKTLSESAKTVGGSSNSPVQLALGAGSSVGAEGLLGIVADGRRTTTRLLDAEFPKFRQLLPTEHTAMATVEIAPLVDAIKRVALVAERGAQVRLEFTEGGLLLSAGGDDAGRAEESLAAEFQGEPLIIAFNPGYLLDGLGSLHSEKVSFGFTTPSRPAVLRPALEEAPEPDASGTFAAPDSDYTYLLMPVRLPG	389	20	3.4e-256	0.9649	/data/input/nr_20241120.dmnd	DNA polymerase III, beta subunit [Rhodococcus rhodochrous ATCC 21198]/GES40137.1 DNA polymerase III beta subunit [Rhodococcus aetherivorans]	Rhodococcus rhodochrous ATCC 21198/Rhodococcus aetherivorans	3.6e-252	389	389	1	389	1	389	373	0.9589	1	1	1	0		ETT26608/ETT26608	699	KOS58082.1 DNA polymerase III subunit beta [Rhodococcus rhodochrous KG-21]/MULTISPECIES: DNA polymerase III subunit beta [Rhodococcus]/MDM7489159.1 DNA polymerase III subunit beta [Rhodococcus indonesiensis]/EME64454.1 DNA polymerase III subunit beta [Rhodococcus ruber BKS 20-38]	Rhodococcus rhodochrous KG-21/Rhodococcus/Rhodococcus indonesiensis/Rhodococcus ruber BKS 20-38	3.4e-256	394	389	6	394	1	389	389	1	0.9873	1	1	0		WP_003936645;WP_003936645;WP_003936645;WP_003936645	709	Z051_00415	1441923	WP_003936645
ENBDON_00002	MULTISPECIES: DNA polymerase III subunit beta	MKFRVAREDFADSVAWVARSLPSRPPVPVLGGVLLGADDQGLTVSGFDYEVSAQVHVSAEVITSGQVLVSGRLLADITRALPNKPVDVVLDGTRVLINCGSAKFSLPTMPVEDYPQLPELPQQTGSLPVEMFAEAISQVAVAAGKDDTLPMLTGIRVEIDGTHMVLAATDRFRLAVRKIEWMPTVESASAAVLVPAKTLSESAKTVGGSSNSPVQLALGAGSSVGAEGLLGIVADGRRTTTRLLDAEFPKFRQLLPTEHTAMATVEIAPLVDAIKRVALVAERGAQVRLEFTEGGLLLSAGGDDAGRAEESLAAEFQGEPLIIAFNPGYLLDGLGSLHSEKVSFGFTTPSRPAVLRPALEEAPEPDASGTFAAPDSDYTYLLMPVRLPG	389	20	3.4e-256	0.9649	/data/input/nr_20241120.dmnd	DNA polymerase III subunit beta [Rhodococcus rhodochrous]	Rhodococcus rhodochrous	4.4e-252	394	389	6	394	1	389	373	0.9589	0.9873	1	1	0		OOL28947	699	KOS58082.1 DNA polymerase III subunit beta [Rhodococcus rhodochrous KG-21]/MULTISPECIES: DNA polymerase III subunit beta [Rhodococcus]/MDM7489159.1 DNA polymerase III subunit beta [Rhodococcus indonesiensis]/EME64454.1 DNA polymerase III subunit beta [Rhodococcus ruber BKS 20-38]	Rhodococcus rhodochrous KG-21/Rhodococcus/Rhodococcus indonesiensis/Rhodococcus ruber BKS 20-38	3.4e-256	394	389	6	394	1	389	389	1	0.9873	1	1	0		WP_003936645;WP_003936645;WP_003936645;WP_003936645	709	dnaN	2722825	WP_044475806
ENBDON_00002	MULTISPECIES: DNA polymerase III subunit beta	MKFRVAREDFADSVAWVARSLPSRPPVPVLGGVLLGADDQGLTVSGFDYEVSAQVHVSAEVITSGQVLVSGRLLADITRALPNKPVDVVLDGTRVLINCGSAKFSLPTMPVEDYPQLPELPQQTGSLPVEMFAEAISQVAVAAGKDDTLPMLTGIRVEIDGTHMVLAATDRFRLAVRKIEWMPTVESASAAVLVPAKTLSESAKTVGGSSNSPVQLALGAGSSVGAEGLLGIVADGRRTTTRLLDAEFPKFRQLLPTEHTAMATVEIAPLVDAIKRVALVAERGAQVRLEFTEGGLLLSAGGDDAGRAEESLAAEFQGEPLIIAFNPGYLLDGLGSLHSEKVSFGFTTPSRPAVLRPALEEAPEPDASGTFAAPDSDYTYLLMPVRLPG	389	20	3.4e-256	0.9649	/data/input/nr_20241120.dmnd	MULTISPECIES: DNA polymerase III subunit beta [Rhodococcus]/ANZ27482.1 DNA polymerase III subunit beta [Rhodococcus sp. WB1]/KDE11417.1 DNA polymerase III subunit beta [Rhodococcus aetherivorans]/MBC2590267.1 DNA polymerase III subunit beta [Rhodococcus aetherivorans]/NGP25235.1 DNA polymerase III subunit beta [Rhodococcus aetherivorans]/PND49911.1 DNA polymerase III subunit beta [Rhodococcus sp.…	Rhodococcus/Rhodococcus sp. WB1/Rhodococcus aetherivorans/Rhodococcus aetherivorans/Rhodococcus aetherivorans/Rhodococcus sp. ENV425	4.4e-252	394	389	6	394	1	389	373	0.9589	0.9873	1	1	0		WP_029546803/WP_029546803/WP_029546803/WP_029546803	699	KOS58082.1 DNA polymerase III subunit beta [Rhodococcus rhodochrous KG-21]/MULTISPECIES: DNA polymerase III subunit beta [Rhodococcus]/MDM7489159.1 DNA polymerase III subunit beta [Rhodococcus indonesiensis]/EME64454.1 DNA polymerase III subunit beta [Rhodococcus ruber BKS 20-38]	Rhodococcus rhodochrous KG-21/Rhodococcus/Rhodococcus indonesiensis/Rhodococcus ruber BKS 20-38	3.4e-256	394	389	6	394	1	389	389	1	0.9873	1	1	0		WP_003936645;WP_003936645;WP_003936645;WP_003936645	709	dnaN	191292	WP_044475806
ENBDON_00002	MULTISPECIES: DNA polymerase III subunit beta	MKFRVAREDFADSVAWVARSLPSRPPVPVLGGVLLGADDQGLTVSGFDYEVSAQVHVSAEVITSGQVLVSGRLLADITRALPNKPVDVVLDGTRVLINCGSAKFSLPTMPVEDYPQLPELPQQTGSLPVEMFAEAISQVAVAAGKDDTLPMLTGIRVEIDGTHMVLAATDRFRLAVRKIEWMPTVESASAAVLVPAKTLSESAKTVGGSSNSPVQLALGAGSSVGAEGLLGIVADGRRTTTRLLDAEFPKFRQLLPTEHTAMATVEIAPLVDAIKRVALVAERGAQVRLEFTEGGLLLSAGGDDAGRAEESLAAEFQGEPLIIAFNPGYLLDGLGSLHSEKVSFGFTTPSRPAVLRPALEEAPEPDASGTFAAPDSDYTYLLMPVRLPG	389	20	3.4e-256	0.9649	/data/input/nr_20241120.dmnd	MULTISPECIES: DNA polymerase III subunit beta [Rhodococcus]/AKE87880.1 DNA polymerase III subunit beta [Rhodococcus aetherivorans]/MDV6293282.1 DNA polymerase III subunit beta [Rhodococcus aetherivorans]/USC15402.1 DNA polymerase III subunit beta [Rhodococcus sp. 11-3]	Rhodococcus/Rhodococcus aetherivorans/Rhodococcus aetherivorans/Rhodococcus sp. 11-3	2.6e-251	394	389	6	394	1	389	372	0.9563	0.9873	1	1	0		WP_050034253/WP_050034253/WP_050034253	697	KOS58082.1 DNA polymerase III subunit beta [Rhodococcus rhodochrous KG-21]/MULTISPECIES: DNA polymerase III subunit beta [Rhodococcus]/MDM7489159.1 DNA polymerase III subunit beta [Rhodococcus indonesiensis]/EME64454.1 DNA polymerase III subunit beta [Rhodococcus ruber BKS 20-38]	Rhodococcus rhodochrous KG-21/Rhodococcus/Rhodococcus indonesiensis/Rhodococcus ruber BKS 20-38	3.4e-256	394	389	6	394	1	389	389	1	0.9873	1	1	0		WP_003936645;WP_003936645;WP_003936645;WP_003936645	709	dnaN	2722825	WP_044475806
ENBDON_00002	MULTISPECIES: DNA polymerase III subunit beta	MKFRVAREDFADSVAWVARSLPSRPPVPVLGGVLLGADDQGLTVSGFDYEVSAQVHVSAEVITSGQVLVSGRLLADITRALPNKPVDVVLDGTRVLINCGSAKFSLPTMPVEDYPQLPELPQQTGSLPVEMFAEAISQVAVAAGKDDTLPMLTGIRVEIDGTHMVLAATDRFRLAVRKIEWMPTVESASAAVLVPAKTLSESAKTVGGSSNSPVQLALGAGSSVGAEGLLGIVADGRRTTTRLLDAEFPKFRQLLPTEHTAMATVEIAPLVDAIKRVALVAERGAQVRLEFTEGGLLLSAGGDDAGRAEESLAAEFQGEPLIIAFNPGYLLDGLGSLHSEKVSFGFTTPSRPAVLRPALEEAPEPDASGTFAAPDSDYTYLLMPVRLPG	389	20	3.4e-256	0.9649	/data/input/nr_20241120.dmnd	DNA polymerase III subunit beta [Rhodococcus sp. 14C212]/NGP05614.1 DNA polymerase III subunit beta [Rhodococcus sp. 14C212]	Rhodococcus sp. 14C212/Rhodococcus sp. 14C212	3.6e-251	394	389	6	394	1	389	371	0.9537	0.9873	1	1	0		WP_165037340	696	KOS58082.1 DNA polymerase III subunit beta [Rhodococcus rhodochrous KG-21]/MULTISPECIES: DNA polymerase III subunit beta [Rhodococcus]/MDM7489159.1 DNA polymerase III subunit beta [Rhodococcus indonesiensis]/EME64454.1 DNA polymerase III subunit beta [Rhodococcus ruber BKS 20-38]	Rhodococcus rhodochrous KG-21/Rhodococcus/Rhodococcus indonesiensis/Rhodococcus ruber BKS 20-38	3.4e-256	394	389	6	394	1	389	389	1	0.9873	1	1	0		WP_003936645;WP_003936645;WP_003936645;WP_003936645	709	dnaN	2722825	WP_044475806
ENBDON_00002	MULTISPECIES: DNA polymerase III subunit beta	MKFRVAREDFADSVAWVARSLPSRPPVPVLGGVLLGADDQGLTVSGFDYEVSAQVHVSAEVITSGQVLVSGRLLADITRALPNKPVDVVLDGTRVLINCGSAKFSLPTMPVEDYPQLPELPQQTGSLPVEMFAEAISQVAVAAGKDDTLPMLTGIRVEIDGTHMVLAATDRFRLAVRKIEWMPTVESASAAVLVPAKTLSESAKTVGGSSNSPVQLALGAGSSVGAEGLLGIVADGRRTTTRLLDAEFPKFRQLLPTEHTAMATVEIAPLVDAIKRVALVAERGAQVRLEFTEGGLLLSAGGDDAGRAEESLAAEFQGEPLIIAFNPGYLLDGLGSLHSEKVSFGFTTPSRPAVLRPALEEAPEPDASGTFAAPDSDYTYLLMPVRLPG	389	20	3.4e-256	0.9649	/data/input/nr_20241120.dmnd	DNA polymerase III subunit beta [Rhodococcus ruber]	Rhodococcus ruber	1.2e-249	394	389	6	394	1	389	384	0.9871	0.9873	1	1	0		MDV3205890	692	KOS58082.1 DNA polymerase III subunit beta [Rhodococcus rhodochrous KG-21]/MULTISPECIES: DNA polymerase III subunit beta [Rhodococcus]/MDM7489159.1 DNA polymerase III subunit beta [Rhodococcus indonesiensis]/EME64454.1 DNA polymerase III subunit beta [Rhodococcus ruber BKS 20-38]	Rhodococcus rhodochrous KG-21/Rhodococcus/Rhodococcus indonesiensis/Rhodococcus ruber BKS 20-38	3.4e-256	394	389	6	394	1	389	389	1	0.9873	1	1	0		WP_003936645;WP_003936645;WP_003936645;WP_003936645	709	dnaN	1830	CDZ89948
ENBDON_00002	MULTISPECIES: DNA polymerase III subunit beta	MKFRVAREDFADSVAWVARSLPSRPPVPVLGGVLLGADDQGLTVSGFDYEVSAQVHVSAEVITSGQVLVSGRLLADITRALPNKPVDVVLDGTRVLINCGSAKFSLPTMPVEDYPQLPELPQQTGSLPVEMFAEAISQVAVAAGKDDTLPMLTGIRVEIDGTHMVLAATDRFRLAVRKIEWMPTVESASAAVLVPAKTLSESAKTVGGSSNSPVQLALGAGSSVGAEGLLGIVADGRRTTTRLLDAEFPKFRQLLPTEHTAMATVEIAPLVDAIKRVALVAERGAQVRLEFTEGGLLLSAGGDDAGRAEESLAAEFQGEPLIIAFNPGYLLDGLGSLHSEKVSFGFTTPSRPAVLRPALEEAPEPDASGTFAAPDSDYTYLLMPVRLPG	389	20	3.4e-256	0.9649	/data/input/nr_20241120.dmnd	MULTISPECIES: DNA polymerase III subunit beta [unclassified Rhodococcus (in: high G+C Gram-positive bacteria)]/MBH0123301.1 DNA polymerase III subunit beta [Rhodococcus sp. CX]/MCK8672157.1 DNA polymerase III subunit beta [Rhodococcus sp. HM1]	unclassified Rhodococcus (in: high G+C Gram-positive bacteria)/Rhodococcus sp. CX/Rhodococcus sp. HM1	5.8e-241	394	389	6	394	1	389	364	0.9357	0.9873	1	1	0		WP_197257103/WP_197257103/WP_197257103	671	KOS58082.1 DNA polymerase III subunit beta [Rhodococcus rhodochrous KG-21]/MULTISPECIES: DNA polymerase III subunit beta [Rhodococcus]/MDM7489159.1 DNA polymerase III subunit beta [Rhodococcus indonesiensis]/EME64454.1 DNA polymerase III subunit beta [Rhodococcus ruber BKS 20-38]	Rhodococcus rhodochrous KG-21/Rhodococcus/Rhodococcus indonesiensis/Rhodococcus ruber BKS 20-38	3.4e-256	394	389	6	394	1	389	389	1	0.9873	1	1	0		WP_003936645;WP_003936645;WP_003936645;WP_003936645	709	Z051_00415	1441923	WP_003936645
ENBDON_00002	MULTISPECIES: DNA polymerase III subunit beta	MKFRVAREDFADSVAWVARSLPSRPPVPVLGGVLLGADDQGLTVSGFDYEVSAQVHVSAEVITSGQVLVSGRLLADITRALPNKPVDVVLDGTRVLINCGSAKFSLPTMPVEDYPQLPELPQQTGSLPVEMFAEAISQVAVAAGKDDTLPMLTGIRVEIDGTHMVLAATDRFRLAVRKIEWMPTVESASAAVLVPAKTLSESAKTVGGSSNSPVQLALGAGSSVGAEGLLGIVADGRRTTTRLLDAEFPKFRQLLPTEHTAMATVEIAPLVDAIKRVALVAERGAQVRLEFTEGGLLLSAGGDDAGRAEESLAAEFQGEPLIIAFNPGYLLDGLGSLHSEKVSFGFTTPSRPAVLRPALEEAPEPDASGTFAAPDSDYTYLLMPVRLPG	389	20	3.4e-256	0.9649	/data/input/nr_20241120.dmnd	DNA polymerase III subunit beta [Rhodococcus zopfii]/MDV2477857.1 DNA polymerase III subunit beta [Rhodococcus zopfii]	Rhodococcus zopfii/Rhodococcus zopfii	1.9e-239	394	389	6	394	1	389	363	0.9332	0.9873	1	1	0		WP_072808913	667	KOS58082.1 DNA polymerase III subunit beta [Rhodococcus rhodochrous KG-21]/MULTISPECIES: DNA polymerase III subunit beta [Rhodococcus]/MDM7489159.1 DNA polymerase III subunit beta [Rhodococcus indonesiensis]/EME64454.1 DNA polymerase III subunit beta [Rhodococcus ruber BKS 20-38]	Rhodococcus rhodochrous KG-21/Rhodococcus/Rhodococcus indonesiensis/Rhodococcus ruber BKS 20-38	3.4e-256	394	389	6	394	1	389	389	1	0.9873	1	1	0		WP_003936645;WP_003936645;WP_003936645;WP_003936645	709	G352_12764	1278076	WP_003936645
ENBDON_00002	MULTISPECIES: DNA polymerase III subunit beta	MKFRVAREDFADSVAWVARSLPSRPPVPVLGGVLLGADDQGLTVSGFDYEVSAQVHVSAEVITSGQVLVSGRLLADITRALPNKPVDVVLDGTRVLINCGSAKFSLPTMPVEDYPQLPELPQQTGSLPVEMFAEAISQVAVAAGKDDTLPMLTGIRVEIDGTHMVLAATDRFRLAVRKIEWMPTVESASAAVLVPAKTLSESAKTVGGSSNSPVQLALGAGSSVGAEGLLGIVADGRRTTTRLLDAEFPKFRQLLPTEHTAMATVEIAPLVDAIKRVALVAERGAQVRLEFTEGGLLLSAGGDDAGRAEESLAAEFQGEPLIIAFNPGYLLDGLGSLHSEKVSFGFTTPSRPAVLRPALEEAPEPDASGTFAAPDSDYTYLLMPVRLPG	389	20	3.4e-256	0.9649	/data/input/nr_20241120.dmnd	DNA polymerase III subunit beta [Rhodococcus phenolicus]	Rhodococcus phenolicus	3.9e-239	394	389	6	394	1	389	363	0.9332	0.9873	1	1	0		WP_068159199	666	KOS58082.1 DNA polymerase III subunit beta [Rhodococcus rhodochrous KG-21]/MULTISPECIES: DNA polymerase III subunit beta [Rhodococcus]/MDM7489159.1 DNA polymerase III subunit beta [Rhodococcus indonesiensis]/EME64454.1 DNA polymerase III subunit beta [Rhodococcus ruber BKS 20-38]	Rhodococcus rhodochrous KG-21/Rhodococcus/Rhodococcus indonesiensis/Rhodococcus ruber BKS 20-38	3.4e-256	394	389	6	394	1	389	389	1	0.9873	1	1	0		WP_003936645;WP_003936645;WP_003936645;WP_003936645	709	dnaN	1830	CDZ89948
ENBDON_00002	MULTISPECIES: DNA polymerase III subunit beta	MKFRVAREDFADSVAWVARSLPSRPPVPVLGGVLLGADDQGLTVSGFDYEVSAQVHVSAEVITSGQVLVSGRLLADITRALPNKPVDVVLDGTRVLINCGSAKFSLPTMPVEDYPQLPELPQQTGSLPVEMFAEAISQVAVAAGKDDTLPMLTGIRVEIDGTHMVLAATDRFRLAVRKIEWMPTVESASAAVLVPAKTLSESAKTVGGSSNSPVQLALGAGSSVGAEGLLGIVADGRRTTTRLLDAEFPKFRQLLPTEHTAMATVEIAPLVDAIKRVALVAERGAQVRLEFTEGGLLLSAGGDDAGRAEESLAAEFQGEPLIIAFNPGYLLDGLGSLHSEKVSFGFTTPSRPAVLRPALEEAPEPDASGTFAAPDSDYTYLLMPVRLPG	389	20	3.4e-256	0.9649	/data/input/nr_20241120.dmnd	MULTISPECIES: DNA polymerase III subunit beta [unclassified Rhodococcus (in: high G+C Gram-positive bacteria)]/MBF0663416.1 DNA polymerase III subunit beta [Rhodococcus sp. (in: high G+C Gram-positive bacteria)]/NME79616.1 DNA polymerase III subunit beta [Rhodococcus sp. 105337]	unclassified Rhodococcus (in: high G+C Gram-positive bacteria)/Rhodococcus sp. (in: high G+C Gram-positive bacteria)/Rhodococcus sp. 105337	1.7e-233	394	389	6	394	1	389	360	0.9254	0.9873	1	1	0		WP_169652309/WP_169652309/WP_169652309	652	KOS58082.1 DNA polymerase III subunit beta [Rhodococcus rhodochrous KG-21]/MULTISPECIES: DNA polymerase III subunit beta [Rhodococcus]/MDM7489159.1 DNA polymerase III subunit beta [Rhodococcus indonesiensis]/EME64454.1 DNA polymerase III subunit beta [Rhodococcus ruber BKS 20-38]	Rhodococcus rhodochrous KG-21/Rhodococcus/Rhodococcus indonesiensis/Rhodococcus ruber BKS 20-38	3.4e-256	394	389	6	394	1	389	389	1	0.9873	1	1	0		WP_003936645;WP_003936645;WP_003936645;WP_003936645	709	G352_12764	1278076	WP_003936645
ENBDON_00002	MULTISPECIES: DNA polymerase III subunit beta	MKFRVAREDFADSVAWVARSLPSRPPVPVLGGVLLGADDQGLTVSGFDYEVSAQVHVSAEVITSGQVLVSGRLLADITRALPNKPVDVVLDGTRVLINCGSAKFSLPTMPVEDYPQLPELPQQTGSLPVEMFAEAISQVAVAAGKDDTLPMLTGIRVEIDGTHMVLAATDRFRLAVRKIEWMPTVESASAAVLVPAKTLSESAKTVGGSSNSPVQLALGAGSSVGAEGLLGIVADGRRTTTRLLDAEFPKFRQLLPTEHTAMATVEIAPLVDAIKRVALVAERGAQVRLEFTEGGLLLSAGGDDAGRAEESLAAEFQGEPLIIAFNPGYLLDGLGSLHSEKVSFGFTTPSRPAVLRPALEEAPEPDASGTFAAPDSDYTYLLMPVRLPG	389	20	3.4e-256	0.9649	/data/input/nr_20241120.dmnd	DNA polymerase III subunit beta [Rhodococcus sp. CH91]	Rhodococcus sp. CH91	4.8e-233	394	389	6	394	1	389	360	0.9254	0.9873	1	1	0		WP_241383550	650	KOS58082.1 DNA polymerase III subunit beta [Rhodococcus rhodochrous KG-21]/MULTISPECIES: DNA polymerase III subunit beta [Rhodococcus]/MDM7489159.1 DNA polymerase III subunit beta [Rhodococcus indonesiensis]/EME64454.1 DNA polymerase III subunit beta [Rhodococcus ruber BKS 20-38]	Rhodococcus rhodochrous KG-21/Rhodococcus/Rhodococcus indonesiensis/Rhodococcus ruber BKS 20-38	3.4e-256	394	389	6	394	1	389	389	1	0.9873	1	1	0		WP_003936645;WP_003936645;WP_003936645;WP_003936645	709	dnaN	1830	CDZ89948
ENBDON_00002	MULTISPECIES: DNA polymerase III subunit beta	MKFRVAREDFADSVAWVARSLPSRPPVPVLGGVLLGADDQGLTVSGFDYEVSAQVHVSAEVITSGQVLVSGRLLADITRALPNKPVDVVLDGTRVLINCGSAKFSLPTMPVEDYPQLPELPQQTGSLPVEMFAEAISQVAVAAGKDDTLPMLTGIRVEIDGTHMVLAATDRFRLAVRKIEWMPTVESASAAVLVPAKTLSESAKTVGGSSNSPVQLALGAGSSVGAEGLLGIVADGRRTTTRLLDAEFPKFRQLLPTEHTAMATVEIAPLVDAIKRVALVAERGAQVRLEFTEGGLLLSAGGDDAGRAEESLAAEFQGEPLIIAFNPGYLLDGLGSLHSEKVSFGFTTPSRPAVLRPALEEAPEPDASGTFAAPDSDYTYLLMPVRLPG	389	20	3.4e-256	0.9649	/data/input/nr_20241120.dmnd																			KOS58082.1 DNA polymerase III subunit beta [Rhodococcus rhodochrous KG-21]/MULTISPECIES: DNA polymerase III subunit beta [Rhodococcus]/MDM7489159.1 DNA polymerase III subunit beta [Rhodococcus indonesiensis]/EME64454.1 DNA polymerase III subunit beta [Rhodococcus ruber BKS 20-38]	Rhodococcus rhodochrous KG-21/Rhodococcus/Rhodococcus indonesiensis/Rhodococcus ruber BKS 20-38	3.4e-256	394	389	6	394	1	389	389	1	0.9873	1	1	0		WP_003936645;WP_003936645;WP_003936645;WP_003936645	709	dnaN	191292	WP_044475806
ENBDON_00002	MULTISPECIES: DNA polymerase III subunit beta	MKFRVAREDFADSVAWVARSLPSRPPVPVLGGVLLGADDQGLTVSGFDYEVSAQVHVSAEVITSGQVLVSGRLLADITRALPNKPVDVVLDGTRVLINCGSAKFSLPTMPVEDYPQLPELPQQTGSLPVEMFAEAISQVAVAAGKDDTLPMLTGIRVEIDGTHMVLAATDRFRLAVRKIEWMPTVESASAAVLVPAKTLSESAKTVGGSSNSPVQLALGAGSSVGAEGLLGIVADGRRTTTRLLDAEFPKFRQLLPTEHTAMATVEIAPLVDAIKRVALVAERGAQVRLEFTEGGLLLSAGGDDAGRAEESLAAEFQGEPLIIAFNPGYLLDGLGSLHSEKVSFGFTTPSRPAVLRPALEEAPEPDASGTFAAPDSDYTYLLMPVRLPG	389	20	3.4e-256	0.9649	/data/input/nr_20241120.dmnd																			KOS58082.1 DNA polymerase III subunit beta [Rhodococcus rhodochrous KG-21]/MULTISPECIES: DNA polymerase III subunit beta [Rhodococcus]/MDM7489159.1 DNA polymerase III subunit beta [Rhodococcus indonesiensis]/EME64454.1 DNA polymerase III subunit beta [Rhodococcus ruber BKS 20-38]	Rhodococcus rhodochrous KG-21/Rhodococcus/Rhodococcus indonesiensis/Rhodococcus ruber BKS 20-38	3.4e-256	394	389	6	394	1	389	389	1	0.9873	1	1	0		WP_003936645;WP_003936645;WP_003936645;WP_003936645	709	dnaN	2722825	WP_044475806
ENBDON_00002	MULTISPECIES: DNA polymerase III subunit beta	MKFRVAREDFADSVAWVARSLPSRPPVPVLGGVLLGADDQGLTVSGFDYEVSAQVHVSAEVITSGQVLVSGRLLADITRALPNKPVDVVLDGTRVLINCGSAKFSLPTMPVEDYPQLPELPQQTGSLPVEMFAEAISQVAVAAGKDDTLPMLTGIRVEIDGTHMVLAATDRFRLAVRKIEWMPTVESASAAVLVPAKTLSESAKTVGGSSNSPVQLALGAGSSVGAEGLLGIVADGRRTTTRLLDAEFPKFRQLLPTEHTAMATVEIAPLVDAIKRVALVAERGAQVRLEFTEGGLLLSAGGDDAGRAEESLAAEFQGEPLIIAFNPGYLLDGLGSLHSEKVSFGFTTPSRPAVLRPALEEAPEPDASGTFAAPDSDYTYLLMPVRLPG	389	20	3.4e-256	0.9649	/data/input/nr_20241120.dmnd																			KOS58082.1 DNA polymerase III subunit beta [Rhodococcus rhodochrous KG-21]/MULTISPECIES: DNA polymerase III subunit beta [Rhodococcus]/MDM7489159.1 DNA polymerase III subunit beta [Rhodococcus indonesiensis]/EME64454.1 DNA polymerase III subunit beta [Rhodococcus ruber BKS 20-38]	Rhodococcus rhodochrous KG-21/Rhodococcus/Rhodococcus indonesiensis/Rhodococcus ruber BKS 20-38	3.4e-256	394	389	6	394	1	389	389	1	0.9873	1	1	0		WP_003936645;WP_003936645;WP_003936645;WP_003936645	709	dnaN	2722825	WP_044475806
ENBDON_00002	MULTISPECIES: DNA polymerase III subunit beta	MKFRVAREDFADSVAWVARSLPSRPPVPVLGGVLLGADDQGLTVSGFDYEVSAQVHVSAEVITSGQVLVSGRLLADITRALPNKPVDVVLDGTRVLINCGSAKFSLPTMPVEDYPQLPELPQQTGSLPVEMFAEAISQVAVAAGKDDTLPMLTGIRVEIDGTHMVLAATDRFRLAVRKIEWMPTVESASAAVLVPAKTLSESAKTVGGSSNSPVQLALGAGSSVGAEGLLGIVADGRRTTTRLLDAEFPKFRQLLPTEHTAMATVEIAPLVDAIKRVALVAERGAQVRLEFTEGGLLLSAGGDDAGRAEESLAAEFQGEPLIIAFNPGYLLDGLGSLHSEKVSFGFTTPSRPAVLRPALEEAPEPDASGTFAAPDSDYTYLLMPVRLPG	389	20	3.4e-256	0.9649	/data/input/nr_20241120.dmnd																			KOS58082.1 DNA polymerase III subunit beta [Rhodococcus rhodochrous KG-21]/MULTISPECIES: DNA polymerase III subunit beta [Rhodococcus]/MDM7489159.1 DNA polymerase III subunit beta [Rhodococcus indonesiensis]/EME64454.1 DNA polymerase III subunit beta [Rhodococcus ruber BKS 20-38]	Rhodococcus rhodochrous KG-21/Rhodococcus/Rhodococcus indonesiensis/Rhodococcus ruber BKS 20-38	3.4e-256	394	389	6	394	1	389	389	1	0.9873	1	1	0		WP_003936645;WP_003936645;WP_003936645;WP_003936645	709	dnaN	191292	WP_044475806
ENBDON_00002	MULTISPECIES: DNA polymerase III subunit beta	MKFRVAREDFADSVAWVARSLPSRPPVPVLGGVLLGADDQGLTVSGFDYEVSAQVHVSAEVITSGQVLVSGRLLADITRALPNKPVDVVLDGTRVLINCGSAKFSLPTMPVEDYPQLPELPQQTGSLPVEMFAEAISQVAVAAGKDDTLPMLTGIRVEIDGTHMVLAATDRFRLAVRKIEWMPTVESASAAVLVPAKTLSESAKTVGGSSNSPVQLALGAGSSVGAEGLLGIVADGRRTTTRLLDAEFPKFRQLLPTEHTAMATVEIAPLVDAIKRVALVAERGAQVRLEFTEGGLLLSAGGDDAGRAEESLAAEFQGEPLIIAFNPGYLLDGLGSLHSEKVSFGFTTPSRPAVLRPALEEAPEPDASGTFAAPDSDYTYLLMPVRLPG	389	20	3.4e-256	0.9649	/data/input/nr_20241120.dmnd																			KOS58082.1 DNA polymerase III subunit beta [Rhodococcus rhodochrous KG-21]/MULTISPECIES: DNA polymerase III subunit beta [Rhodococcus]/MDM7489159.1 DNA polymerase III subunit beta [Rhodococcus indonesiensis]/EME64454.1 DNA polymerase III subunit beta [Rhodococcus ruber BKS 20-38]	Rhodococcus rhodochrous KG-21/Rhodococcus/Rhodococcus indonesiensis/Rhodococcus ruber BKS 20-38	3.4e-256	394	389	6	394	1	389	389	1	0.9873	1	1	0		WP_003936645;WP_003936645;WP_003936645;WP_003936645	709	Z051_00415	1441923	WP_003936645
ENBDON_00002	MULTISPECIES: DNA polymerase III subunit beta	MKFRVAREDFADSVAWVARSLPSRPPVPVLGGVLLGADDQGLTVSGFDYEVSAQVHVSAEVITSGQVLVSGRLLADITRALPNKPVDVVLDGTRVLINCGSAKFSLPTMPVEDYPQLPELPQQTGSLPVEMFAEAISQVAVAAGKDDTLPMLTGIRVEIDGTHMVLAATDRFRLAVRKIEWMPTVESASAAVLVPAKTLSESAKTVGGSSNSPVQLALGAGSSVGAEGLLGIVADGRRTTTRLLDAEFPKFRQLLPTEHTAMATVEIAPLVDAIKRVALVAERGAQVRLEFTEGGLLLSAGGDDAGRAEESLAAEFQGEPLIIAFNPGYLLDGLGSLHSEKVSFGFTTPSRPAVLRPALEEAPEPDASGTFAAPDSDYTYLLMPVRLPG	389	20	3.4e-256	0.9649	/data/input/nr_20241120.dmnd																			KOS58082.1 DNA polymerase III subunit beta [Rhodococcus rhodochrous KG-21]/MULTISPECIES: DNA polymerase III subunit beta [Rhodococcus]/MDM7489159.1 DNA polymerase III subunit beta [Rhodococcus indonesiensis]/EME64454.1 DNA polymerase III subunit beta [Rhodococcus ruber BKS 20-38]	Rhodococcus rhodochrous KG-21/Rhodococcus/Rhodococcus indonesiensis/Rhodococcus ruber BKS 20-38	3.4e-256	394	389	6	394	1	389	389	1	0.9873	1	1	0		WP_003936645;WP_003936645;WP_003936645;WP_003936645	709	dnaN	191292	WP_044475806
ENBDON_00002	MULTISPECIES: DNA polymerase III subunit beta	MKFRVAREDFADSVAWVARSLPSRPPVPVLGGVLLGADDQGLTVSGFDYEVSAQVHVSAEVITSGQVLVSGRLLADITRALPNKPVDVVLDGTRVLINCGSAKFSLPTMPVEDYPQLPELPQQTGSLPVEMFAEAISQVAVAAGKDDTLPMLTGIRVEIDGTHMVLAATDRFRLAVRKIEWMPTVESASAAVLVPAKTLSESAKTVGGSSNSPVQLALGAGSSVGAEGLLGIVADGRRTTTRLLDAEFPKFRQLLPTEHTAMATVEIAPLVDAIKRVALVAERGAQVRLEFTEGGLLLSAGGDDAGRAEESLAAEFQGEPLIIAFNPGYLLDGLGSLHSEKVSFGFTTPSRPAVLRPALEEAPEPDASGTFAAPDSDYTYLLMPVRLPG	389	20	3.4e-256	0.9649	/data/input/nr_20241120.dmnd																			KOS58082.1 DNA polymerase III subunit beta [Rhodococcus rhodochrous KG-21]/MULTISPECIES: DNA polymerase III subunit beta [Rhodococcus]/MDM7489159.1 DNA polymerase III subunit beta [Rhodococcus indonesiensis]/EME64454.1 DNA polymerase III subunit beta [Rhodococcus ruber BKS 20-38]	Rhodococcus rhodochrous KG-21/Rhodococcus/Rhodococcus indonesiensis/Rhodococcus ruber BKS 20-38	3.4e-256	394	389	6	394	1	389	389	1	0.9873	1	1	0		WP_003936645;WP_003936645;WP_003936645;WP_003936645	709	G352_12764	1278076	WP_003936645
ENBDON_00002	MULTISPECIES: DNA polymerase III subunit beta	MKFRVAREDFADSVAWVARSLPSRPPVPVLGGVLLGADDQGLTVSGFDYEVSAQVHVSAEVITSGQVLVSGRLLADITRALPNKPVDVVLDGTRVLINCGSAKFSLPTMPVEDYPQLPELPQQTGSLPVEMFAEAISQVAVAAGKDDTLPMLTGIRVEIDGTHMVLAATDRFRLAVRKIEWMPTVESASAAVLVPAKTLSESAKTVGGSSNSPVQLALGAGSSVGAEGLLGIVADGRRTTTRLLDAEFPKFRQLLPTEHTAMATVEIAPLVDAIKRVALVAERGAQVRLEFTEGGLLLSAGGDDAGRAEESLAAEFQGEPLIIAFNPGYLLDGLGSLHSEKVSFGFTTPSRPAVLRPALEEAPEPDASGTFAAPDSDYTYLLMPVRLPG	389	20	3.4e-256	0.9649	/data/input/nr_20241120.dmnd																			KOS58082.1 DNA polymerase III subunit beta [Rhodococcus rhodochrous KG-21]/MULTISPECIES: DNA polymerase III subunit beta [Rhodococcus]/MDM7489159.1 DNA polymerase III subunit beta [Rhodococcus indonesiensis]/EME64454.1 DNA polymerase III subunit beta [Rhodococcus ruber BKS 20-38]	Rhodococcus rhodochrous KG-21/Rhodococcus/Rhodococcus indonesiensis/Rhodococcus ruber BKS 20-38	3.4e-256	394	389	6	394	1	389	389	1	0.9873	1	1	0		WP_003936645;WP_003936645;WP_003936645;WP_003936645	709	Z051_00415	1441923	WP_003936645
ENBDON_00002	MULTISPECIES: DNA polymerase III subunit beta	MKFRVAREDFADSVAWVARSLPSRPPVPVLGGVLLGADDQGLTVSGFDYEVSAQVHVSAEVITSGQVLVSGRLLADITRALPNKPVDVVLDGTRVLINCGSAKFSLPTMPVEDYPQLPELPQQTGSLPVEMFAEAISQVAVAAGKDDTLPMLTGIRVEIDGTHMVLAATDRFRLAVRKIEWMPTVESASAAVLVPAKTLSESAKTVGGSSNSPVQLALGAGSSVGAEGLLGIVADGRRTTTRLLDAEFPKFRQLLPTEHTAMATVEIAPLVDAIKRVALVAERGAQVRLEFTEGGLLLSAGGDDAGRAEESLAAEFQGEPLIIAFNPGYLLDGLGSLHSEKVSFGFTTPSRPAVLRPALEEAPEPDASGTFAAPDSDYTYLLMPVRLPG	389	20	3.4e-256	0.9649	/data/input/nr_20241120.dmnd																			KOS58082.1 DNA polymerase III subunit beta [Rhodococcus rhodochrous KG-21]/MULTISPECIES: DNA polymerase III subunit beta [Rhodococcus]/MDM7489159.1 DNA polymerase III subunit beta [Rhodococcus indonesiensis]/EME64454.1 DNA polymerase III subunit beta [Rhodococcus ruber BKS 20-38]	Rhodococcus rhodochrous KG-21/Rhodococcus/Rhodococcus indonesiensis/Rhodococcus ruber BKS 20-38	3.4e-256	394	389	6	394	1	389	389	1	0.9873	1	1	0		WP_003936645;WP_003936645;WP_003936645;WP_003936645	709	dnaN	191292	WP_044475806
ENBDON_00002	MULTISPECIES: DNA polymerase III subunit beta	MKFRVAREDFADSVAWVARSLPSRPPVPVLGGVLLGADDQGLTVSGFDYEVSAQVHVSAEVITSGQVLVSGRLLADITRALPNKPVDVVLDGTRVLINCGSAKFSLPTMPVEDYPQLPELPQQTGSLPVEMFAEAISQVAVAAGKDDTLPMLTGIRVEIDGTHMVLAATDRFRLAVRKIEWMPTVESASAAVLVPAKTLSESAKTVGGSSNSPVQLALGAGSSVGAEGLLGIVADGRRTTTRLLDAEFPKFRQLLPTEHTAMATVEIAPLVDAIKRVALVAERGAQVRLEFTEGGLLLSAGGDDAGRAEESLAAEFQGEPLIIAFNPGYLLDGLGSLHSEKVSFGFTTPSRPAVLRPALEEAPEPDASGTFAAPDSDYTYLLMPVRLPG	389	20	3.4e-256	0.9649	/data/input/nr_20241120.dmnd																			KOS58082.1 DNA polymerase III subunit beta [Rhodococcus rhodochrous KG-21]/MULTISPECIES: DNA polymerase III subunit beta [Rhodococcus]/MDM7489159.1 DNA polymerase III subunit beta [Rhodococcus indonesiensis]/EME64454.1 DNA polymerase III subunit beta [Rhodococcus ruber BKS 20-38]	Rhodococcus rhodochrous KG-21/Rhodococcus/Rhodococcus indonesiensis/Rhodococcus ruber BKS 20-38	3.4e-256	394	389	6	394	1	389	389	1	0.9873	1	1	0		WP_003936645;WP_003936645;WP_003936645;WP_003936645	709	dnaN	191292	WP_044475806
ENBDON_00002	MULTISPECIES: DNA polymerase III subunit beta	MKFRVAREDFADSVAWVARSLPSRPPVPVLGGVLLGADDQGLTVSGFDYEVSAQVHVSAEVITSGQVLVSGRLLADITRALPNKPVDVVLDGTRVLINCGSAKFSLPTMPVEDYPQLPELPQQTGSLPVEMFAEAISQVAVAAGKDDTLPMLTGIRVEIDGTHMVLAATDRFRLAVRKIEWMPTVESASAAVLVPAKTLSESAKTVGGSSNSPVQLALGAGSSVGAEGLLGIVADGRRTTTRLLDAEFPKFRQLLPTEHTAMATVEIAPLVDAIKRVALVAERGAQVRLEFTEGGLLLSAGGDDAGRAEESLAAEFQGEPLIIAFNPGYLLDGLGSLHSEKVSFGFTTPSRPAVLRPALEEAPEPDASGTFAAPDSDYTYLLMPVRLPG	389	20	3.4e-256	0.9649	/data/input/nr_20241120.dmnd																			KOS58082.1 DNA polymerase III subunit beta [Rhodococcus rhodochrous KG-21]/MULTISPECIES: DNA polymerase III subunit beta [Rhodococcus]/MDM7489159.1 DNA polymerase III subunit beta [Rhodococcus indonesiensis]/EME64454.1 DNA polymerase III subunit beta [Rhodococcus ruber BKS 20-38]	Rhodococcus rhodochrous KG-21/Rhodococcus/Rhodococcus indonesiensis/Rhodococcus ruber BKS 20-38	3.4e-256	394	389	6	394	1	389	389	1	0.9873	1	1	0		WP_003936645;WP_003936645;WP_003936645;WP_003936645	709	G352_12764	1278076	WP_003936645
ENBDON_00002	MULTISPECIES: DNA polymerase III subunit beta	MKFRVAREDFADSVAWVARSLPSRPPVPVLGGVLLGADDQGLTVSGFDYEVSAQVHVSAEVITSGQVLVSGRLLADITRALPNKPVDVVLDGTRVLINCGSAKFSLPTMPVEDYPQLPELPQQTGSLPVEMFAEAISQVAVAAGKDDTLPMLTGIRVEIDGTHMVLAATDRFRLAVRKIEWMPTVESASAAVLVPAKTLSESAKTVGGSSNSPVQLALGAGSSVGAEGLLGIVADGRRTTTRLLDAEFPKFRQLLPTEHTAMATVEIAPLVDAIKRVALVAERGAQVRLEFTEGGLLLSAGGDDAGRAEESLAAEFQGEPLIIAFNPGYLLDGLGSLHSEKVSFGFTTPSRPAVLRPALEEAPEPDASGTFAAPDSDYTYLLMPVRLPG	389	20	3.4e-256	0.9649	/data/input/nr_20241120.dmnd																			KOS58082.1 DNA polymerase III subunit beta [Rhodococcus rhodochrous KG-21]/MULTISPECIES: DNA polymerase III subunit beta [Rhodococcus]/MDM7489159.1 DNA polymerase III subunit beta [Rhodococcus indonesiensis]/EME64454.1 DNA polymerase III subunit beta [Rhodococcus ruber BKS 20-38]	Rhodococcus rhodochrous KG-21/Rhodococcus/Rhodococcus indonesiensis/Rhodococcus ruber BKS 20-38	3.4e-256	394	389	6	394	1	389	389	1	0.9873	1	1	0		WP_003936645;WP_003936645;WP_003936645;WP_003936645	709	G352_12764	1278076	WP_003936645
ENBDON_00002	MULTISPECIES: DNA polymerase III subunit beta	MKFRVAREDFADSVAWVARSLPSRPPVPVLGGVLLGADDQGLTVSGFDYEVSAQVHVSAEVITSGQVLVSGRLLADITRALPNKPVDVVLDGTRVLINCGSAKFSLPTMPVEDYPQLPELPQQTGSLPVEMFAEAISQVAVAAGKDDTLPMLTGIRVEIDGTHMVLAATDRFRLAVRKIEWMPTVESASAAVLVPAKTLSESAKTVGGSSNSPVQLALGAGSSVGAEGLLGIVADGRRTTTRLLDAEFPKFRQLLPTEHTAMATVEIAPLVDAIKRVALVAERGAQVRLEFTEGGLLLSAGGDDAGRAEESLAAEFQGEPLIIAFNPGYLLDGLGSLHSEKVSFGFTTPSRPAVLRPALEEAPEPDASGTFAAPDSDYTYLLMPVRLPG	389	20	3.4e-256	0.9649	/data/input/nr_20241120.dmnd																			KOS58082.1 DNA polymerase III subunit beta [Rhodococcus rhodochrous KG-21]/MULTISPECIES: DNA polymerase III subunit beta [Rhodococcus]/MDM7489159.1 DNA polymerase III subunit beta [Rhodococcus indonesiensis]/EME64454.1 DNA polymerase III subunit beta [Rhodococcus ruber BKS 20-38]	Rhodococcus rhodochrous KG-21/Rhodococcus/Rhodococcus indonesiensis/Rhodococcus ruber BKS 20-38	3.4e-256	394	389	6	394	1	389	389	1	0.9873	1	1	0		WP_003936645;WP_003936645;WP_003936645;WP_003936645	709	dnaN	1830	CDZ89948
ENBDON_00002	MULTISPECIES: DNA polymerase III subunit beta	MKFRVAREDFADSVAWVARSLPSRPPVPVLGGVLLGADDQGLTVSGFDYEVSAQVHVSAEVITSGQVLVSGRLLADITRALPNKPVDVVLDGTRVLINCGSAKFSLPTMPVEDYPQLPELPQQTGSLPVEMFAEAISQVAVAAGKDDTLPMLTGIRVEIDGTHMVLAATDRFRLAVRKIEWMPTVESASAAVLVPAKTLSESAKTVGGSSNSPVQLALGAGSSVGAEGLLGIVADGRRTTTRLLDAEFPKFRQLLPTEHTAMATVEIAPLVDAIKRVALVAERGAQVRLEFTEGGLLLSAGGDDAGRAEESLAAEFQGEPLIIAFNPGYLLDGLGSLHSEKVSFGFTTPSRPAVLRPALEEAPEPDASGTFAAPDSDYTYLLMPVRLPG	389	20	3.4e-256	0.9649	/data/input/nr_20241120.dmnd																			KOS58082.1 DNA polymerase III subunit beta [Rhodococcus rhodochrous KG-21]/MULTISPECIES: DNA polymerase III subunit beta [Rhodococcus]/MDM7489159.1 DNA polymerase III subunit beta [Rhodococcus indonesiensis]/EME64454.1 DNA polymerase III subunit beta [Rhodococcus ruber BKS 20-38]	Rhodococcus rhodochrous KG-21/Rhodococcus/Rhodococcus indonesiensis/Rhodococcus ruber BKS 20-38	3.4e-256	394	389	6	394	1	389	389	1	0.9873	1	1	0		WP_003936645;WP_003936645;WP_003936645;WP_003936645	709	dnaN	191292	WP_044475806
ENBDON_00002	MULTISPECIES: DNA polymerase III subunit beta	MKFRVAREDFADSVAWVARSLPSRPPVPVLGGVLLGADDQGLTVSGFDYEVSAQVHVSAEVITSGQVLVSGRLLADITRALPNKPVDVVLDGTRVLINCGSAKFSLPTMPVEDYPQLPELPQQTGSLPVEMFAEAISQVAVAAGKDDTLPMLTGIRVEIDGTHMVLAATDRFRLAVRKIEWMPTVESASAAVLVPAKTLSESAKTVGGSSNSPVQLALGAGSSVGAEGLLGIVADGRRTTTRLLDAEFPKFRQLLPTEHTAMATVEIAPLVDAIKRVALVAERGAQVRLEFTEGGLLLSAGGDDAGRAEESLAAEFQGEPLIIAFNPGYLLDGLGSLHSEKVSFGFTTPSRPAVLRPALEEAPEPDASGTFAAPDSDYTYLLMPVRLPG	389	20	3.4e-256	0.9649	/data/input/nr_20241120.dmnd																			KOS58082.1 DNA polymerase III subunit beta [Rhodococcus rhodochrous KG-21]/MULTISPECIES: DNA polymerase III subunit beta [Rhodococcus]/MDM7489159.1 DNA polymerase III subunit beta [Rhodococcus indonesiensis]/EME64454.1 DNA polymerase III subunit beta [Rhodococcus ruber BKS 20-38]	Rhodococcus rhodochrous KG-21/Rhodococcus/Rhodococcus indonesiensis/Rhodococcus ruber BKS 20-38	3.4e-256	394	389	6	394	1	389	389	1	0.9873	1	1	0		WP_003936645;WP_003936645;WP_003936645;WP_003936645	709	dnaN	2722825	WP_044475806
ENBDON_00002	MULTISPECIES: DNA polymerase III subunit beta	MKFRVAREDFADSVAWVARSLPSRPPVPVLGGVLLGADDQGLTVSGFDYEVSAQVHVSAEVITSGQVLVSGRLLADITRALPNKPVDVVLDGTRVLINCGSAKFSLPTMPVEDYPQLPELPQQTGSLPVEMFAEAISQVAVAAGKDDTLPMLTGIRVEIDGTHMVLAATDRFRLAVRKIEWMPTVESASAAVLVPAKTLSESAKTVGGSSNSPVQLALGAGSSVGAEGLLGIVADGRRTTTRLLDAEFPKFRQLLPTEHTAMATVEIAPLVDAIKRVALVAERGAQVRLEFTEGGLLLSAGGDDAGRAEESLAAEFQGEPLIIAFNPGYLLDGLGSLHSEKVSFGFTTPSRPAVLRPALEEAPEPDASGTFAAPDSDYTYLLMPVRLPG	389	20	3.4e-256	0.9649	/data/input/nr_20241120.dmnd																			KOS58082.1 DNA polymerase III subunit beta [Rhodococcus rhodochrous KG-21]/MULTISPECIES: DNA polymerase III subunit beta [Rhodococcus]/MDM7489159.1 DNA polymerase III subunit beta [Rhodococcus indonesiensis]/EME64454.1 DNA polymerase III subunit beta [Rhodococcus ruber BKS 20-38]	Rhodococcus rhodochrous KG-21/Rhodococcus/Rhodococcus indonesiensis/Rhodococcus ruber BKS 20-38	3.4e-256	394	389	6	394	1	389	389	1	0.9873	1	1	0		WP_003936645;WP_003936645;WP_003936645;WP_003936645	709	dnaN	1830	CDZ89948
ENBDON_00002	MULTISPECIES: DNA polymerase III subunit beta	MKFRVAREDFADSVAWVARSLPSRPPVPVLGGVLLGADDQGLTVSGFDYEVSAQVHVSAEVITSGQVLVSGRLLADITRALPNKPVDVVLDGTRVLINCGSAKFSLPTMPVEDYPQLPELPQQTGSLPVEMFAEAISQVAVAAGKDDTLPMLTGIRVEIDGTHMVLAATDRFRLAVRKIEWMPTVESASAAVLVPAKTLSESAKTVGGSSNSPVQLALGAGSSVGAEGLLGIVADGRRTTTRLLDAEFPKFRQLLPTEHTAMATVEIAPLVDAIKRVALVAERGAQVRLEFTEGGLLLSAGGDDAGRAEESLAAEFQGEPLIIAFNPGYLLDGLGSLHSEKVSFGFTTPSRPAVLRPALEEAPEPDASGTFAAPDSDYTYLLMPVRLPG	389	20	3.4e-256	0.9649	/data/input/nr_20241120.dmnd																			KOS58082.1 DNA polymerase III subunit beta [Rhodococcus rhodochrous KG-21]/MULTISPECIES: DNA polymerase III subunit beta [Rhodococcus]/MDM7489159.1 DNA polymerase III subunit beta [Rhodococcus indonesiensis]/EME64454.1 DNA polymerase III subunit beta [Rhodococcus ruber BKS 20-38]	Rhodococcus rhodochrous KG-21/Rhodococcus/Rhodococcus indonesiensis/Rhodococcus ruber BKS 20-38	3.4e-256	394	389	6	394	1	389	389	1	0.9873	1	1	0		WP_003936645;WP_003936645;WP_003936645;WP_003936645	709	G352_12764	1278076	WP_003936645
ENBDON_00002	MULTISPECIES: DNA polymerase III subunit beta	MKFRVAREDFADSVAWVARSLPSRPPVPVLGGVLLGADDQGLTVSGFDYEVSAQVHVSAEVITSGQVLVSGRLLADITRALPNKPVDVVLDGTRVLINCGSAKFSLPTMPVEDYPQLPELPQQTGSLPVEMFAEAISQVAVAAGKDDTLPMLTGIRVEIDGTHMVLAATDRFRLAVRKIEWMPTVESASAAVLVPAKTLSESAKTVGGSSNSPVQLALGAGSSVGAEGLLGIVADGRRTTTRLLDAEFPKFRQLLPTEHTAMATVEIAPLVDAIKRVALVAERGAQVRLEFTEGGLLLSAGGDDAGRAEESLAAEFQGEPLIIAFNPGYLLDGLGSLHSEKVSFGFTTPSRPAVLRPALEEAPEPDASGTFAAPDSDYTYLLMPVRLPG	389	20	3.4e-256	0.9649	/data/input/nr_20241120.dmnd																			KOS58082.1 DNA polymerase III subunit beta [Rhodococcus rhodochrous KG-21]/MULTISPECIES: DNA polymerase III subunit beta [Rhodococcus]/MDM7489159.1 DNA polymerase III subunit beta [Rhodococcus indonesiensis]/EME64454.1 DNA polymerase III subunit beta [Rhodococcus ruber BKS 20-38]	Rhodococcus rhodochrous KG-21/Rhodococcus/Rhodococcus indonesiensis/Rhodococcus ruber BKS 20-38	3.4e-256	394	389	6	394	1	389	389	1	0.9873	1	1	0		WP_003936645;WP_003936645;WP_003936645;WP_003936645	709	dnaN	1830	CDZ89948
ENBDON_00002	MULTISPECIES: DNA polymerase III subunit beta	MKFRVAREDFADSVAWVARSLPSRPPVPVLGGVLLGADDQGLTVSGFDYEVSAQVHVSAEVITSGQVLVSGRLLADITRALPNKPVDVVLDGTRVLINCGSAKFSLPTMPVEDYPQLPELPQQTGSLPVEMFAEAISQVAVAAGKDDTLPMLTGIRVEIDGTHMVLAATDRFRLAVRKIEWMPTVESASAAVLVPAKTLSESAKTVGGSSNSPVQLALGAGSSVGAEGLLGIVADGRRTTTRLLDAEFPKFRQLLPTEHTAMATVEIAPLVDAIKRVALVAERGAQVRLEFTEGGLLLSAGGDDAGRAEESLAAEFQGEPLIIAFNPGYLLDGLGSLHSEKVSFGFTTPSRPAVLRPALEEAPEPDASGTFAAPDSDYTYLLMPVRLPG	389	20	3.4e-256	0.9649	/data/input/nr_20241120.dmnd																			KOS58082.1 DNA polymerase III subunit beta [Rhodococcus rhodochrous KG-21]/MULTISPECIES: DNA polymerase III subunit beta [Rhodococcus]/MDM7489159.1 DNA polymerase III subunit beta [Rhodococcus indonesiensis]/EME64454.1 DNA polymerase III subunit beta [Rhodococcus ruber BKS 20-38]	Rhodococcus rhodochrous KG-21/Rhodococcus/Rhodococcus indonesiensis/Rhodococcus ruber BKS 20-38	3.4e-256	394	389	6	394	1	389	389	1	0.9873	1	1	0		WP_003936645;WP_003936645;WP_003936645;WP_003936645	709	G352_12764	1278076	WP_003936645
ENBDON_00002	MULTISPECIES: DNA polymerase III subunit beta	MKFRVAREDFADSVAWVARSLPSRPPVPVLGGVLLGADDQGLTVSGFDYEVSAQVHVSAEVITSGQVLVSGRLLADITRALPNKPVDVVLDGTRVLINCGSAKFSLPTMPVEDYPQLPELPQQTGSLPVEMFAEAISQVAVAAGKDDTLPMLTGIRVEIDGTHMVLAATDRFRLAVRKIEWMPTVESASAAVLVPAKTLSESAKTVGGSSNSPVQLALGAGSSVGAEGLLGIVADGRRTTTRLLDAEFPKFRQLLPTEHTAMATVEIAPLVDAIKRVALVAERGAQVRLEFTEGGLLLSAGGDDAGRAEESLAAEFQGEPLIIAFNPGYLLDGLGSLHSEKVSFGFTTPSRPAVLRPALEEAPEPDASGTFAAPDSDYTYLLMPVRLPG	389	20	3.4e-256	0.9649	/data/input/nr_20241120.dmnd																			KOS58082.1 DNA polymerase III subunit beta [Rhodococcus rhodochrous KG-21]/MULTISPECIES: DNA polymerase III subunit beta [Rhodococcus]/MDM7489159.1 DNA polymerase III subunit beta [Rhodococcus indonesiensis]/EME64454.1 DNA polymerase III subunit beta [Rhodococcus ruber BKS 20-38]	Rhodococcus rhodochrous KG-21/Rhodococcus/Rhodococcus indonesiensis/Rhodococcus ruber BKS 20-38	3.4e-256	394	389	6	394	1	389	389	1	0.9873	1	1	0		WP_003936645;WP_003936645;WP_003936645;WP_003936645	709	dnaN	2722825	WP_044475806
ENBDON_00003	DNA replication/repair protein RecF	MYVRTFSLRDFRSWEAVSLNLAPGPTVFLGRNGHGKTNLLEALGYLSTLTSHRVSGDAPLLRTGTSRALVGAVVVNGGRELGIDVEINEGRPNRGRINQSPTRRPREILGILRTVLFAPEDLSLVRGDPGDRRRFLDELLATRIPRMSGVRADYDKVLRQRSALLKTAGGALRRGSRSGDGANALATLDVWDGHLAAHGSELLAARVALLHELAPHVAEAYRSIAPESRPALLRYRSTVGEALPPEFADPDRAPLSDDREVIEAAFLTRLAQARPKEIERGVCLVGPHRDELDLILGDQPAKGFASHGESWSFALALRLGAFSLLRADGTDPVLMLDDVFAELDRRRRTALAAVAASAEQVLITAAVPEDVPAELAAVRFGVRAEDTDRGRLSALTALD…	417	20	1.1e-290	0.97	/data/input/nr_20241120.dmnd	DNA replication/repair protein RecF [Rhodococcus rhodochrous]/KOS58083.1 recombinase RecF [Rhodococcus rhodochrous KG-21]	Rhodococcus rhodochrous/Rhodococcus rhodochrous KG-21	1.1e-290	417	417	1	417	1	417	417	1	1	1	1	0		WP_054370840/WP_054370840	798	KOS58083.1 recombinase RecF [Rhodococcus rhodochrous KG-21]/DNA replication/repair protein RecF [Rhodococcus rhodochrous]	Rhodococcus rhodochrous KG-21/Rhodococcus rhodochrous	1.1e-290	417	417	1	417	1	417	417	1	1	1	1	0		WP_054370840;WP_054370840	798	recF	1278076	WP_003936644		GO:0003677-IEA	DNA binding-IEA
ENBDON_00003	DNA replication/repair protein RecF	MYVRTFSLRDFRSWEAVSLNLAPGPTVFLGRNGHGKTNLLEALGYLSTLTSHRVSGDAPLLRTGTSRALVGAVVVNGGRELGIDVEINEGRPNRGRINQSPTRRPREILGILRTVLFAPEDLSLVRGDPGDRRRFLDELLATRIPRMSGVRADYDKVLRQRSALLKTAGGALRRGSRSGDGANALATLDVWDGHLAAHGSELLAARVALLHELAPHVAEAYRSIAPESRPALLRYRSTVGEALPPEFADPDRAPLSDDREVIEAAFLTRLAQARPKEIERGVCLVGPHRDELDLILGDQPAKGFASHGESWSFALALRLGAFSLLRADGTDPVLMLDDVFAELDRRRRTALAAVAASAEQVLITAAVPEDVPAELAAVRFGVRAEDTDRGRLSALTALD…	417	20	1.1e-290	0.97	/data/input/nr_20241120.dmnd	DNA replication/repair protein RecF [Rhodococcus indonesiensis]/MDM7489160.1 DNA replication/repair protein RecF [Rhodococcus indonesiensis]	Rhodococcus indonesiensis/Rhodococcus indonesiensis	6.4e-290	417	417	1	417	1	417	416	0.9976	1	1	1	0		WP_289379245	796	KOS58083.1 recombinase RecF [Rhodococcus rhodochrous KG-21]/DNA replication/repair protein RecF [Rhodococcus rhodochrous]	Rhodococcus rhodochrous KG-21/Rhodococcus rhodochrous	1.1e-290	417	417	1	417	1	417	417	1	1	1	1	0		WP_054370840;WP_054370840	798	recF	1830	WP_040273103		GO:0006281-IEA	DNA repair-IEA
ENBDON_00003	DNA replication/repair protein RecF	MYVRTFSLRDFRSWEAVSLNLAPGPTVFLGRNGHGKTNLLEALGYLSTLTSHRVSGDAPLLRTGTSRALVGAVVVNGGRELGIDVEINEGRPNRGRINQSPTRRPREILGILRTVLFAPEDLSLVRGDPGDRRRFLDELLATRIPRMSGVRADYDKVLRQRSALLKTAGGALRRGSRSGDGANALATLDVWDGHLAAHGSELLAARVALLHELAPHVAEAYRSIAPESRPALLRYRSTVGEALPPEFADPDRAPLSDDREVIEAAFLTRLAQARPKEIERGVCLVGPHRDELDLILGDQPAKGFASHGESWSFALALRLGAFSLLRADGTDPVLMLDDVFAELDRRRRTALAAVAASAEQVLITAAVPEDVPAELAAVRFGVRAEDTDRGRLSALTALD…	417	20	1.1e-290	0.97	/data/input/nr_20241120.dmnd	DNA replication/repair protein RecF [Rhodococcus ruber]/EME64453.1 recombination protein F [Rhodococcus ruber BKS 20-38]	Rhodococcus ruber/Rhodococcus ruber BKS 20-38	2.1e-288	417	417	1	417	1	417	414	0.9928	1	1	1	0		WP_003936644/WP_003936644	793	KOS58083.1 recombinase RecF [Rhodococcus rhodochrous KG-21]/DNA replication/repair protein RecF [Rhodococcus rhodochrous]	Rhodococcus rhodochrous KG-21/Rhodococcus rhodochrous	1.1e-290	417	417	1	417	1	417	417	1	1	1	1	0		WP_054370840;WP_054370840	798	recF	1441923	WP_054370840		GO:0006260-IEA	DNA replication-IEA
ENBDON_00003	DNA replication/repair protein RecF	MYVRTFSLRDFRSWEAVSLNLAPGPTVFLGRNGHGKTNLLEALGYLSTLTSHRVSGDAPLLRTGTSRALVGAVVVNGGRELGIDVEINEGRPNRGRINQSPTRRPREILGILRTVLFAPEDLSLVRGDPGDRRRFLDELLATRIPRMSGVRADYDKVLRQRSALLKTAGGALRRGSRSGDGANALATLDVWDGHLAAHGSELLAARVALLHELAPHVAEAYRSIAPESRPALLRYRSTVGEALPPEFADPDRAPLSDDREVIEAAFLTRLAQARPKEIERGVCLVGPHRDELDLILGDQPAKGFASHGESWSFALALRLGAFSLLRADGTDPVLMLDDVFAELDRRRRTALAAVAASAEQVLITAAVPEDVPAELAAVRFGVRAEDTDRGRLSALTALD…	417	20	1.1e-290	0.97	/data/input/nr_20241120.dmnd	MULTISPECIES: DNA replication/repair protein RecF [Rhodococcus]/ETT26607.1 DNA replication and repair protein recF [Rhodococcus rhodochrous ATCC 21198]/ANZ27481.1 DNA replication/repair protein RecF [Rhodococcus sp. WB1]/KDE11418.1 recombinase RecF [Rhodococcus aetherivorans]/MBC2590268.1 DNA replication/repair protein RecF [Rhodococcus aetherivorans]/NGP25234.1 DNA replication/repair protein Rec…	Rhodococcus/Rhodococcus rhodochrous ATCC 21198/Rhodococcus sp. WB1/Rhodococcus aetherivorans/Rhodococcus aetherivorans/Rhodococcus aetherivorans	6.2e-281	417	417	1	417	1	417	409	0.9808	1	1	1	0		WP_029546804/WP_029546804/WP_029546804/WP_029546804	774	KOS58083.1 recombinase RecF [Rhodococcus rhodochrous KG-21]/DNA replication/repair protein RecF [Rhodococcus rhodochrous]	Rhodococcus rhodochrous KG-21/Rhodococcus rhodochrous	1.1e-290	417	417	1	417	1	417	417	1	1	1	1	0		WP_054370840;WP_054370840	798	recF	1830	WP_040273103		GO:0005737-IEA	cytoplasm-IEA
ENBDON_00003	DNA replication/repair protein RecF	MYVRTFSLRDFRSWEAVSLNLAPGPTVFLGRNGHGKTNLLEALGYLSTLTSHRVSGDAPLLRTGTSRALVGAVVVNGGRELGIDVEINEGRPNRGRINQSPTRRPREILGILRTVLFAPEDLSLVRGDPGDRRRFLDELLATRIPRMSGVRADYDKVLRQRSALLKTAGGALRRGSRSGDGANALATLDVWDGHLAAHGSELLAARVALLHELAPHVAEAYRSIAPESRPALLRYRSTVGEALPPEFADPDRAPLSDDREVIEAAFLTRLAQARPKEIERGVCLVGPHRDELDLILGDQPAKGFASHGESWSFALALRLGAFSLLRADGTDPVLMLDDVFAELDRRRRTALAAVAASAEQVLITAAVPEDVPAELAAVRFGVRAEDTDRGRLSALTALD…	417	20	1.1e-290	0.97	/data/input/nr_20241120.dmnd	DNA replication/repair protein RecF [Rhodococcus aetherivorans]/AKE87881.1 recombinase RecF [Rhodococcus aetherivorans]	Rhodococcus aetherivorans/Rhodococcus aetherivorans	8.8e-281	417	417	1	417	1	417	409	0.9808	1	1	1	0		WP_050034254	773	KOS58083.1 recombinase RecF [Rhodococcus rhodochrous KG-21]/DNA replication/repair protein RecF [Rhodococcus rhodochrous]	Rhodococcus rhodochrous KG-21/Rhodococcus rhodochrous	1.1e-290	417	417	1	417	1	417	417	1	1	1	1	0		WP_054370840;WP_054370840	798	recF	191292	WP_006934464		GO:0009432-IEA	SOS response-IEA
ENBDON_00003	DNA replication/repair protein RecF	MYVRTFSLRDFRSWEAVSLNLAPGPTVFLGRNGHGKTNLLEALGYLSTLTSHRVSGDAPLLRTGTSRALVGAVVVNGGRELGIDVEINEGRPNRGRINQSPTRRPREILGILRTVLFAPEDLSLVRGDPGDRRRFLDELLATRIPRMSGVRADYDKVLRQRSALLKTAGGALRRGSRSGDGANALATLDVWDGHLAAHGSELLAARVALLHELAPHVAEAYRSIAPESRPALLRYRSTVGEALPPEFADPDRAPLSDDREVIEAAFLTRLAQARPKEIERGVCLVGPHRDELDLILGDQPAKGFASHGESWSFALALRLGAFSLLRADGTDPVLMLDDVFAELDRRRRTALAAVAASAEQVLITAAVPEDVPAELAAVRFGVRAEDTDRGRLSALTALD…	417	20	1.1e-290	0.97	/data/input/nr_20241120.dmnd	recombinase RecF [Rhodococcus rhodochrous]	Rhodococcus rhodochrous	1.8e-280	417	417	1	417	1	417	408	0.9784	1	1	1	0		OOL28946	773	KOS58083.1 recombinase RecF [Rhodococcus rhodochrous KG-21]/DNA replication/repair protein RecF [Rhodococcus rhodochrous]	Rhodococcus rhodochrous KG-21/Rhodococcus rhodochrous	1.1e-290	417	417	1	417	1	417	417	1	1	1	1	0		WP_054370840;WP_054370840	798	recF	1278076	WP_003936644		GO:0000731-IEA	DNA synthesis involved in DNA repair-IEA
ENBDON_00003	DNA replication/repair protein RecF	MYVRTFSLRDFRSWEAVSLNLAPGPTVFLGRNGHGKTNLLEALGYLSTLTSHRVSGDAPLLRTGTSRALVGAVVVNGGRELGIDVEINEGRPNRGRINQSPTRRPREILGILRTVLFAPEDLSLVRGDPGDRRRFLDELLATRIPRMSGVRADYDKVLRQRSALLKTAGGALRRGSRSGDGANALATLDVWDGHLAAHGSELLAARVALLHELAPHVAEAYRSIAPESRPALLRYRSTVGEALPPEFADPDRAPLSDDREVIEAAFLTRLAQARPKEIERGVCLVGPHRDELDLILGDQPAKGFASHGESWSFALALRLGAFSLLRADGTDPVLMLDDVFAELDRRRRTALAAVAASAEQVLITAAVPEDVPAELAAVRFGVRAEDTDRGRLSALTALD…	417	20	1.1e-290	0.97	/data/input/nr_20241120.dmnd	DNA replication/repair protein RecF [Rhodococcus sp. DMU1]/QIX48122.1 DNA replication/repair protein RecF [Rhodococcus sp. DMU1]	Rhodococcus sp. DMU1/Rhodococcus sp. DMU1	3.6e-280	417	417	1	417	1	417	408	0.9784	1	1	1	0		WP_168578826	772	KOS58083.1 recombinase RecF [Rhodococcus rhodochrous KG-21]/DNA replication/repair protein RecF [Rhodococcus rhodochrous]	Rhodococcus rhodochrous KG-21/Rhodococcus rhodochrous	1.1e-290	417	417	1	417	1	417	417	1	1	1	1	0		WP_054370840;WP_054370840	798	recF	191292	WP_006934464		GO:0006302-IEA	double-strand break repair-IEA
ENBDON_00003	DNA replication/repair protein RecF	MYVRTFSLRDFRSWEAVSLNLAPGPTVFLGRNGHGKTNLLEALGYLSTLTSHRVSGDAPLLRTGTSRALVGAVVVNGGRELGIDVEINEGRPNRGRINQSPTRRPREILGILRTVLFAPEDLSLVRGDPGDRRRFLDELLATRIPRMSGVRADYDKVLRQRSALLKTAGGALRRGSRSGDGANALATLDVWDGHLAAHGSELLAARVALLHELAPHVAEAYRSIAPESRPALLRYRSTVGEALPPEFADPDRAPLSDDREVIEAAFLTRLAQARPKEIERGVCLVGPHRDELDLILGDQPAKGFASHGESWSFALALRLGAFSLLRADGTDPVLMLDDVFAELDRRRRTALAAVAASAEQVLITAAVPEDVPAELAAVRFGVRAEDTDRGRLSALTALD…	417	20	1.1e-290	0.97	/data/input/nr_20241120.dmnd	DNA replication/repair protein RecF [Rhodococcus sp. 11-3]/USC15403.1 DNA replication/repair protein RecF [Rhodococcus sp. 11-3]	Rhodococcus sp. 11-3/Rhodococcus sp. 11-3	3.6e-280	417	417	1	417	1	417	408	0.9784	1	1	1	0		WP_251549969	772	KOS58083.1 recombinase RecF [Rhodococcus rhodochrous KG-21]/DNA replication/repair protein RecF [Rhodococcus rhodochrous]	Rhodococcus rhodochrous KG-21/Rhodococcus rhodochrous	1.1e-290	417	417	1	417	1	417	417	1	1	1	1	0		WP_054370840;WP_054370840	798	recF	1441923	WP_054370840		GO:0005524-IEA	ATP binding-IEA
ENBDON_00003	DNA replication/repair protein RecF	MYVRTFSLRDFRSWEAVSLNLAPGPTVFLGRNGHGKTNLLEALGYLSTLTSHRVSGDAPLLRTGTSRALVGAVVVNGGRELGIDVEINEGRPNRGRINQSPTRRPREILGILRTVLFAPEDLSLVRGDPGDRRRFLDELLATRIPRMSGVRADYDKVLRQRSALLKTAGGALRRGSRSGDGANALATLDVWDGHLAAHGSELLAARVALLHELAPHVAEAYRSIAPESRPALLRYRSTVGEALPPEFADPDRAPLSDDREVIEAAFLTRLAQARPKEIERGVCLVGPHRDELDLILGDQPAKGFASHGESWSFALALRLGAFSLLRADGTDPVLMLDDVFAELDRRRRTALAAVAASAEQVLITAAVPEDVPAELAAVRFGVRAEDTDRGRLSALTALD…	417	20	1.1e-290	0.97	/data/input/nr_20241120.dmnd	DNA replication and repair protein RecF [Rhodococcus sp. YH1]	Rhodococcus sp. YH1	5.1e-280	417	417	1	417	1	417	409	0.9808	1	1	1	0		NCL77108	771	KOS58083.1 recombinase RecF [Rhodococcus rhodochrous KG-21]/DNA replication/repair protein RecF [Rhodococcus rhodochrous]	Rhodococcus rhodochrous KG-21/Rhodococcus rhodochrous	1.1e-290	417	417	1	417	1	417	417	1	1	1	1	0		WP_054370840;WP_054370840	798	recF	1830	WP_040273103		GO:0003697-IEA	single-stranded DNA binding-IEA
ENBDON_00003	DNA replication/repair protein RecF	MYVRTFSLRDFRSWEAVSLNLAPGPTVFLGRNGHGKTNLLEALGYLSTLTSHRVSGDAPLLRTGTSRALVGAVVVNGGRELGIDVEINEGRPNRGRINQSPTRRPREILGILRTVLFAPEDLSLVRGDPGDRRRFLDELLATRIPRMSGVRADYDKVLRQRSALLKTAGGALRRGSRSGDGANALATLDVWDGHLAAHGSELLAARVALLHELAPHVAEAYRSIAPESRPALLRYRSTVGEALPPEFADPDRAPLSDDREVIEAAFLTRLAQARPKEIERGVCLVGPHRDELDLILGDQPAKGFASHGESWSFALALRLGAFSLLRADGTDPVLMLDDVFAELDRRRRTALAAVAASAEQVLITAAVPEDVPAELAAVRFGVRAEDTDRGRLSALTALD…	417	20	1.1e-290	0.97	/data/input/nr_20241120.dmnd	DNA replication/repair protein RecF [Rhodococcus sp. 14C212]	Rhodococcus sp. 14C212	7.3e-280	417	417	1	417	1	417	407	0.976	1	1	1	0		NGP05615	771	KOS58083.1 recombinase RecF [Rhodococcus rhodochrous KG-21]/DNA replication/repair protein RecF [Rhodococcus rhodochrous]	Rhodococcus rhodochrous KG-21/Rhodococcus rhodochrous	1.1e-290	417	417	1	417	1	417	417	1	1	1	1	0		WP_054370840;WP_054370840	798	recF	1830	WP_040273103
ENBDON_00003	DNA replication/repair protein RecF	MYVRTFSLRDFRSWEAVSLNLAPGPTVFLGRNGHGKTNLLEALGYLSTLTSHRVSGDAPLLRTGTSRALVGAVVVNGGRELGIDVEINEGRPNRGRINQSPTRRPREILGILRTVLFAPEDLSLVRGDPGDRRRFLDELLATRIPRMSGVRADYDKVLRQRSALLKTAGGALRRGSRSGDGANALATLDVWDGHLAAHGSELLAARVALLHELAPHVAEAYRSIAPESRPALLRYRSTVGEALPPEFADPDRAPLSDDREVIEAAFLTRLAQARPKEIERGVCLVGPHRDELDLILGDQPAKGFASHGESWSFALALRLGAFSLLRADGTDPVLMLDDVFAELDRRRRTALAAVAASAEQVLITAAVPEDVPAELAAVRFGVRAEDTDRGRLSALTALD…	417	20	1.1e-290	0.97	/data/input/nr_20241120.dmnd	DNA replication/repair protein RecF [Rhodococcus aetherivorans]/MDV6293283.1 DNA replication/repair protein RecF [Rhodococcus aetherivorans]	Rhodococcus aetherivorans/Rhodococcus aetherivorans	7.3e-280	417	417	1	417	1	417	408	0.9784	1	1	1	0		WP_317550333	771	KOS58083.1 recombinase RecF [Rhodococcus rhodochrous KG-21]/DNA replication/repair protein RecF [Rhodococcus rhodochrous]	Rhodococcus rhodochrous KG-21/Rhodococcus rhodochrous	1.1e-290	417	417	1	417	1	417	417	1	1	1	1	0		WP_054370840;WP_054370840	798	recF	1830	WP_040273103
ENBDON_00003	DNA replication/repair protein RecF	MYVRTFSLRDFRSWEAVSLNLAPGPTVFLGRNGHGKTNLLEALGYLSTLTSHRVSGDAPLLRTGTSRALVGAVVVNGGRELGIDVEINEGRPNRGRINQSPTRRPREILGILRTVLFAPEDLSLVRGDPGDRRRFLDELLATRIPRMSGVRADYDKVLRQRSALLKTAGGALRRGSRSGDGANALATLDVWDGHLAAHGSELLAARVALLHELAPHVAEAYRSIAPESRPALLRYRSTVGEALPPEFADPDRAPLSDDREVIEAAFLTRLAQARPKEIERGVCLVGPHRDELDLILGDQPAKGFASHGESWSFALALRLGAFSLLRADGTDPVLMLDDVFAELDRRRRTALAAVAASAEQVLITAAVPEDVPAELAAVRFGVRAEDTDRGRLSALTALD…	417	20	1.1e-290	0.97	/data/input/nr_20241120.dmnd	DNA replication/repair protein RecF [Rhodococcus aetherivorans]/UYF94427.1 DNA replication/repair protein RecF [Rhodococcus aetherivorans]/CCW10977.1 DNA recombination and repair protein RecF [Rhodococcus aetherivorans]	Rhodococcus aetherivorans/Rhodococcus aetherivorans/Rhodococcus aetherivorans	1.5e-279	417	417	1	417	1	417	407	0.976	1	1	1	0		WP_006934464	770	KOS58083.1 recombinase RecF [Rhodococcus rhodochrous KG-21]/DNA replication/repair protein RecF [Rhodococcus rhodochrous]	Rhodococcus rhodochrous KG-21/Rhodococcus rhodochrous	1.1e-290	417	417	1	417	1	417	417	1	1	1	1	0		WP_054370840;WP_054370840	798	recF	1278076	WP_003936644
ENBDON_00003	DNA replication/repair protein RecF	MYVRTFSLRDFRSWEAVSLNLAPGPTVFLGRNGHGKTNLLEALGYLSTLTSHRVSGDAPLLRTGTSRALVGAVVVNGGRELGIDVEINEGRPNRGRINQSPTRRPREILGILRTVLFAPEDLSLVRGDPGDRRRFLDELLATRIPRMSGVRADYDKVLRQRSALLKTAGGALRRGSRSGDGANALATLDVWDGHLAAHGSELLAARVALLHELAPHVAEAYRSIAPESRPALLRYRSTVGEALPPEFADPDRAPLSDDREVIEAAFLTRLAQARPKEIERGVCLVGPHRDELDLILGDQPAKGFASHGESWSFALALRLGAFSLLRADGTDPVLMLDDVFAELDRRRRTALAAVAASAEQVLITAAVPEDVPAELAAVRFGVRAEDTDRGRLSALTALD…	417	20	1.1e-290	0.97	/data/input/nr_20241120.dmnd	DNA replication/repair protein RecF [Rhodococcus ruber]/KXF85732.1 recombinase RecF [Rhodococcus ruber Chol-4]	Rhodococcus ruber/Rhodococcus ruber Chol-4	1.4e-277	417	417	1	417	1	417	405	0.9712	1	1	1	0		WP_017681016/WP_017681016	765	KOS58083.1 recombinase RecF [Rhodococcus rhodochrous KG-21]/DNA replication/repair protein RecF [Rhodococcus rhodochrous]	Rhodococcus rhodochrous KG-21/Rhodococcus rhodochrous	1.1e-290	417	417	1	417	1	417	417	1	1	1	1	0		WP_054370840;WP_054370840	798	recF	1441923	WP_054370840
ENBDON_00003	DNA replication/repair protein RecF	MYVRTFSLRDFRSWEAVSLNLAPGPTVFLGRNGHGKTNLLEALGYLSTLTSHRVSGDAPLLRTGTSRALVGAVVVNGGRELGIDVEINEGRPNRGRINQSPTRRPREILGILRTVLFAPEDLSLVRGDPGDRRRFLDELLATRIPRMSGVRADYDKVLRQRSALLKTAGGALRRGSRSGDGANALATLDVWDGHLAAHGSELLAARVALLHELAPHVAEAYRSIAPESRPALLRYRSTVGEALPPEFADPDRAPLSDDREVIEAAFLTRLAQARPKEIERGVCLVGPHRDELDLILGDQPAKGFASHGESWSFALALRLGAFSLLRADGTDPVLMLDDVFAELDRRRRTALAAVAASAEQVLITAAVPEDVPAELAAVRFGVRAEDTDRGRLSALTALD…	417	20	1.1e-290	0.97	/data/input/nr_20241120.dmnd	MULTISPECIES: DNA replication/repair protein RecF [Rhodococcus]/RIK10857.1 MAG: DNA replication/repair protein RecF [Acidobacteriota bacterium]/AWG97087.1 DNA replication and repair protein RecF [Rhodococcus ruber]/AXY49463.1 recombinase RecF [Rhodococcus ruber]/MBP2214167.1 DNA replication and repair protein RecF [Rhodococcus ruber]/MCD2125291.1 DNA replication/repair protein RecF [Rhodococcus r…	Rhodococcus/Acidobacteriota bacterium/Rhodococcus ruber/Rhodococcus ruber/Rhodococcus ruber/Rhodococcus ruber	2e-277	417	417	1	417	1	417	405	0.9712	1	1	1	0		WP_040273103/WP_040273103/WP_040273103	765	KOS58083.1 recombinase RecF [Rhodococcus rhodochrous KG-21]/DNA replication/repair protein RecF [Rhodococcus rhodochrous]	Rhodococcus rhodochrous KG-21/Rhodococcus rhodochrous	1.1e-290	417	417	1	417	1	417	417	1	1	1	1	0		WP_054370840;WP_054370840	798	recF	191292	WP_006934464
ENBDON_00003	DNA replication/repair protein RecF	MYVRTFSLRDFRSWEAVSLNLAPGPTVFLGRNGHGKTNLLEALGYLSTLTSHRVSGDAPLLRTGTSRALVGAVVVNGGRELGIDVEINEGRPNRGRINQSPTRRPREILGILRTVLFAPEDLSLVRGDPGDRRRFLDELLATRIPRMSGVRADYDKVLRQRSALLKTAGGALRRGSRSGDGANALATLDVWDGHLAAHGSELLAARVALLHELAPHVAEAYRSIAPESRPALLRYRSTVGEALPPEFADPDRAPLSDDREVIEAAFLTRLAQARPKEIERGVCLVGPHRDELDLILGDQPAKGFASHGESWSFALALRLGAFSLLRADGTDPVLMLDDVFAELDRRRRTALAAVAASAEQVLITAAVPEDVPAELAAVRFGVRAEDTDRGRLSALTALD…	417	20	1.1e-290	0.97	/data/input/nr_20241120.dmnd	DNA replication/repair protein RecF [Rhodococcus ruber]/RQM34664.1 DNA replication/repair protein RecF [Rhodococcus ruber]	Rhodococcus ruber/Rhodococcus ruber	2e-277	417	417	1	417	1	417	405	0.9712	1	1	1	0		WP_124258684	765	KOS58083.1 recombinase RecF [Rhodococcus rhodochrous KG-21]/DNA replication/repair protein RecF [Rhodococcus rhodochrous]	Rhodococcus rhodochrous KG-21/Rhodococcus rhodochrous	1.1e-290	417	417	1	417	1	417	417	1	1	1	1	0		WP_054370840;WP_054370840	798	recF	191292	WP_006934464
ENBDON_00003	DNA replication/repair protein RecF	MYVRTFSLRDFRSWEAVSLNLAPGPTVFLGRNGHGKTNLLEALGYLSTLTSHRVSGDAPLLRTGTSRALVGAVVVNGGRELGIDVEINEGRPNRGRINQSPTRRPREILGILRTVLFAPEDLSLVRGDPGDRRRFLDELLATRIPRMSGVRADYDKVLRQRSALLKTAGGALRRGSRSGDGANALATLDVWDGHLAAHGSELLAARVALLHELAPHVAEAYRSIAPESRPALLRYRSTVGEALPPEFADPDRAPLSDDREVIEAAFLTRLAQARPKEIERGVCLVGPHRDELDLILGDQPAKGFASHGESWSFALALRLGAFSLLRADGTDPVLMLDDVFAELDRRRRTALAAVAASAEQVLITAAVPEDVPAELAAVRFGVRAEDTDRGRLSALTALD…	417	20	1.1e-290	0.97	/data/input/nr_20241120.dmnd	DNA replication/repair protein RecF [Rhodococcus ruber]/MDX5452943.1 DNA replication/repair protein RecF [Rhodococcus sp. (in: high G+C Gram-positive bacteria)]	Rhodococcus ruber/Rhodococcus sp. (in: high G+C Gram-positive bacteria)	2.3e-276	417	417	1	417	1	417	404	0.9688	1	1	1	0		MDV3205889/MDV3205889	762	KOS58083.1 recombinase RecF [Rhodococcus rhodochrous KG-21]/DNA replication/repair protein RecF [Rhodococcus rhodochrous]	Rhodococcus rhodochrous KG-21/Rhodococcus rhodochrous	1.1e-290	417	417	1	417	1	417	417	1	1	1	1	0		WP_054370840;WP_054370840	798	recF	191292	WP_006934464
ENBDON_00003	DNA replication/repair protein RecF	MYVRTFSLRDFRSWEAVSLNLAPGPTVFLGRNGHGKTNLLEALGYLSTLTSHRVSGDAPLLRTGTSRALVGAVVVNGGRELGIDVEINEGRPNRGRINQSPTRRPREILGILRTVLFAPEDLSLVRGDPGDRRRFLDELLATRIPRMSGVRADYDKVLRQRSALLKTAGGALRRGSRSGDGANALATLDVWDGHLAAHGSELLAARVALLHELAPHVAEAYRSIAPESRPALLRYRSTVGEALPPEFADPDRAPLSDDREVIEAAFLTRLAQARPKEIERGVCLVGPHRDELDLILGDQPAKGFASHGESWSFALALRLGAFSLLRADGTDPVLMLDDVFAELDRRRRTALAAVAASAEQVLITAAVPEDVPAELAAVRFGVRAEDTDRGRLSALTALD…	417	20	1.1e-290	0.97	/data/input/nr_20241120.dmnd	MULTISPECIES: DNA replication/repair protein RecF [Rhodococcus]/MDO2379394.1 DNA replication/repair protein RecF [Rhodococcus ruber]/ATQ30111.1 DNA replication and repair protein RecF [Rhodococcus ruber]/AUM19132.1 DNA replication and repair protein RecF [Rhodococcus ruber]/MBD8055137.1 DNA replication/repair protein RecF [Rhodococcus ruber]/MCF8784770.1 DNA replication/repair protein RecF [Rhodo…	Rhodococcus/Rhodococcus ruber/Rhodococcus ruber/Rhodococcus ruber/Rhodococcus ruber/Rhodococcus ruber	1.3e-275	417	417	1	417	1	417	403	0.9664	1	1	1	0		WP_010595442/WP_010595442	760	KOS58083.1 recombinase RecF [Rhodococcus rhodochrous KG-21]/DNA replication/repair protein RecF [Rhodococcus rhodochrous]	Rhodococcus rhodochrous KG-21/Rhodococcus rhodochrous	1.1e-290	417	417	1	417	1	417	417	1	1	1	1	0		WP_054370840;WP_054370840	798	recF	1278076	WP_003936644
ENBDON_00003	DNA replication/repair protein RecF	MYVRTFSLRDFRSWEAVSLNLAPGPTVFLGRNGHGKTNLLEALGYLSTLTSHRVSGDAPLLRTGTSRALVGAVVVNGGRELGIDVEINEGRPNRGRINQSPTRRPREILGILRTVLFAPEDLSLVRGDPGDRRRFLDELLATRIPRMSGVRADYDKVLRQRSALLKTAGGALRRGSRSGDGANALATLDVWDGHLAAHGSELLAARVALLHELAPHVAEAYRSIAPESRPALLRYRSTVGEALPPEFADPDRAPLSDDREVIEAAFLTRLAQARPKEIERGVCLVGPHRDELDLILGDQPAKGFASHGESWSFALALRLGAFSLLRADGTDPVLMLDDVFAELDRRRRTALAAVAASAEQVLITAAVPEDVPAELAAVRFGVRAEDTDRGRLSALTALD…	417	20	1.1e-290	0.97	/data/input/nr_20241120.dmnd	DNA replication/repair protein RecF [Rhodococcus sp. CH91]	Rhodococcus sp. CH91	1.2e-235	410	398	1	398	1	398	366	0.9196	0.9707	0.9544	1	0		WP_241383549	659	KOS58083.1 recombinase RecF [Rhodococcus rhodochrous KG-21]/DNA replication/repair protein RecF [Rhodococcus rhodochrous]	Rhodococcus rhodochrous KG-21/Rhodococcus rhodochrous	1.1e-290	417	417	1	417	1	417	417	1	1	1	1	0		WP_054370840;WP_054370840	798	recF	191292	WP_006934464
ENBDON_00003	DNA replication/repair protein RecF	MYVRTFSLRDFRSWEAVSLNLAPGPTVFLGRNGHGKTNLLEALGYLSTLTSHRVSGDAPLLRTGTSRALVGAVVVNGGRELGIDVEINEGRPNRGRINQSPTRRPREILGILRTVLFAPEDLSLVRGDPGDRRRFLDELLATRIPRMSGVRADYDKVLRQRSALLKTAGGALRRGSRSGDGANALATLDVWDGHLAAHGSELLAARVALLHELAPHVAEAYRSIAPESRPALLRYRSTVGEALPPEFADPDRAPLSDDREVIEAAFLTRLAQARPKEIERGVCLVGPHRDELDLILGDQPAKGFASHGESWSFALALRLGAFSLLRADGTDPVLMLDDVFAELDRRRRTALAAVAASAEQVLITAAVPEDVPAELAAVRFGVRAEDTDRGRLSALTALD…	417	20	1.1e-290	0.97	/data/input/nr_20241120.dmnd	DNA replication/repair protein RecF [Rhodococcus zopfii]	Rhodococcus zopfii	1.4e-235	405	396	1	396	1	396	363	0.9167	0.9778	0.9496	1	0		WP_072808914	659	KOS58083.1 recombinase RecF [Rhodococcus rhodochrous KG-21]/DNA replication/repair protein RecF [Rhodococcus rhodochrous]	Rhodococcus rhodochrous KG-21/Rhodococcus rhodochrous	1.1e-290	417	417	1	417	1	417	417	1	1	1	1	0		WP_054370840;WP_054370840	798	recF	1830	WP_040273103
ENBDON_00003	DNA replication/repair protein RecF	MYVRTFSLRDFRSWEAVSLNLAPGPTVFLGRNGHGKTNLLEALGYLSTLTSHRVSGDAPLLRTGTSRALVGAVVVNGGRELGIDVEINEGRPNRGRINQSPTRRPREILGILRTVLFAPEDLSLVRGDPGDRRRFLDELLATRIPRMSGVRADYDKVLRQRSALLKTAGGALRRGSRSGDGANALATLDVWDGHLAAHGSELLAARVALLHELAPHVAEAYRSIAPESRPALLRYRSTVGEALPPEFADPDRAPLSDDREVIEAAFLTRLAQARPKEIERGVCLVGPHRDELDLILGDQPAKGFASHGESWSFALALRLGAFSLLRADGTDPVLMLDDVFAELDRRRRTALAAVAASAEQVLITAAVPEDVPAELAAVRFGVRAEDTDRGRLSALTALD…	417	20	1.1e-290	0.97	/data/input/nr_20241120.dmnd	DNA replication/repair protein RecF [Rhodococcus sp. HM1]/MCK8672158.1 DNA replication/repair protein RecF [Rhodococcus sp. HM1]	Rhodococcus sp. HM1/Rhodococcus sp. HM1	2e-235	405	396	1	396	1	396	363	0.9167	0.9778	0.9496	1	0		WP_248674553	658	KOS58083.1 recombinase RecF [Rhodococcus rhodochrous KG-21]/DNA replication/repair protein RecF [Rhodococcus rhodochrous]	Rhodococcus rhodochrous KG-21/Rhodococcus rhodochrous	1.1e-290	417	417	1	417	1	417	417	1	1	1	1	0		WP_054370840;WP_054370840	798	recF	1278076	WP_003936644
ENBDON_00003	DNA replication/repair protein RecF	MYVRTFSLRDFRSWEAVSLNLAPGPTVFLGRNGHGKTNLLEALGYLSTLTSHRVSGDAPLLRTGTSRALVGAVVVNGGRELGIDVEINEGRPNRGRINQSPTRRPREILGILRTVLFAPEDLSLVRGDPGDRRRFLDELLATRIPRMSGVRADYDKVLRQRSALLKTAGGALRRGSRSGDGANALATLDVWDGHLAAHGSELLAARVALLHELAPHVAEAYRSIAPESRPALLRYRSTVGEALPPEFADPDRAPLSDDREVIEAAFLTRLAQARPKEIERGVCLVGPHRDELDLILGDQPAKGFASHGESWSFALALRLGAFSLLRADGTDPVLMLDDVFAELDRRRRTALAAVAASAEQVLITAAVPEDVPAELAAVRFGVRAEDTDRGRLSALTALD…	417	20	1.1e-290	0.97	/data/input/nr_20241120.dmnd																			KOS58083.1 recombinase RecF [Rhodococcus rhodochrous KG-21]/DNA replication/repair protein RecF [Rhodococcus rhodochrous]	Rhodococcus rhodochrous KG-21/Rhodococcus rhodochrous	1.1e-290	417	417	1	417	1	417	417	1	1	1	1	0		WP_054370840;WP_054370840	798	recF	1830	WP_040273103
ENBDON_00003	DNA replication/repair protein RecF	MYVRTFSLRDFRSWEAVSLNLAPGPTVFLGRNGHGKTNLLEALGYLSTLTSHRVSGDAPLLRTGTSRALVGAVVVNGGRELGIDVEINEGRPNRGRINQSPTRRPREILGILRTVLFAPEDLSLVRGDPGDRRRFLDELLATRIPRMSGVRADYDKVLRQRSALLKTAGGALRRGSRSGDGANALATLDVWDGHLAAHGSELLAARVALLHELAPHVAEAYRSIAPESRPALLRYRSTVGEALPPEFADPDRAPLSDDREVIEAAFLTRLAQARPKEIERGVCLVGPHRDELDLILGDQPAKGFASHGESWSFALALRLGAFSLLRADGTDPVLMLDDVFAELDRRRRTALAAVAASAEQVLITAAVPEDVPAELAAVRFGVRAEDTDRGRLSALTALD…	417	20	1.1e-290	0.97	/data/input/nr_20241120.dmnd																			KOS58083.1 recombinase RecF [Rhodococcus rhodochrous KG-21]/DNA replication/repair protein RecF [Rhodococcus rhodochrous]	Rhodococcus rhodochrous KG-21/Rhodococcus rhodochrous	1.1e-290	417	417	1	417	1	417	417	1	1	1	1	0		WP_054370840;WP_054370840	798	recF	1441923	WP_054370840
ENBDON_00003	DNA replication/repair protein RecF	MYVRTFSLRDFRSWEAVSLNLAPGPTVFLGRNGHGKTNLLEALGYLSTLTSHRVSGDAPLLRTGTSRALVGAVVVNGGRELGIDVEINEGRPNRGRINQSPTRRPREILGILRTVLFAPEDLSLVRGDPGDRRRFLDELLATRIPRMSGVRADYDKVLRQRSALLKTAGGALRRGSRSGDGANALATLDVWDGHLAAHGSELLAARVALLHELAPHVAEAYRSIAPESRPALLRYRSTVGEALPPEFADPDRAPLSDDREVIEAAFLTRLAQARPKEIERGVCLVGPHRDELDLILGDQPAKGFASHGESWSFALALRLGAFSLLRADGTDPVLMLDDVFAELDRRRRTALAAVAASAEQVLITAAVPEDVPAELAAVRFGVRAEDTDRGRLSALTALD…	417	20	1.1e-290	0.97	/data/input/nr_20241120.dmnd																			KOS58083.1 recombinase RecF [Rhodococcus rhodochrous KG-21]/DNA replication/repair protein RecF [Rhodococcus rhodochrous]	Rhodococcus rhodochrous KG-21/Rhodococcus rhodochrous	1.1e-290	417	417	1	417	1	417	417	1	1	1	1	0		WP_054370840;WP_054370840	798	recF	1441923	WP_054370840
ENBDON_00003	DNA replication/repair protein RecF	MYVRTFSLRDFRSWEAVSLNLAPGPTVFLGRNGHGKTNLLEALGYLSTLTSHRVSGDAPLLRTGTSRALVGAVVVNGGRELGIDVEINEGRPNRGRINQSPTRRPREILGILRTVLFAPEDLSLVRGDPGDRRRFLDELLATRIPRMSGVRADYDKVLRQRSALLKTAGGALRRGSRSGDGANALATLDVWDGHLAAHGSELLAARVALLHELAPHVAEAYRSIAPESRPALLRYRSTVGEALPPEFADPDRAPLSDDREVIEAAFLTRLAQARPKEIERGVCLVGPHRDELDLILGDQPAKGFASHGESWSFALALRLGAFSLLRADGTDPVLMLDDVFAELDRRRRTALAAVAASAEQVLITAAVPEDVPAELAAVRFGVRAEDTDRGRLSALTALD…	417	20	1.1e-290	0.97	/data/input/nr_20241120.dmnd																			KOS58083.1 recombinase RecF [Rhodococcus rhodochrous KG-21]/DNA replication/repair protein RecF [Rhodococcus rhodochrous]	Rhodococcus rhodochrous KG-21/Rhodococcus rhodochrous	1.1e-290	417	417	1	417	1	417	417	1	1	1	1	0		WP_054370840;WP_054370840	798	recF	1441923	WP_054370840
ENBDON_00003	DNA replication/repair protein RecF	MYVRTFSLRDFRSWEAVSLNLAPGPTVFLGRNGHGKTNLLEALGYLSTLTSHRVSGDAPLLRTGTSRALVGAVVVNGGRELGIDVEINEGRPNRGRINQSPTRRPREILGILRTVLFAPEDLSLVRGDPGDRRRFLDELLATRIPRMSGVRADYDKVLRQRSALLKTAGGALRRGSRSGDGANALATLDVWDGHLAAHGSELLAARVALLHELAPHVAEAYRSIAPESRPALLRYRSTVGEALPPEFADPDRAPLSDDREVIEAAFLTRLAQARPKEIERGVCLVGPHRDELDLILGDQPAKGFASHGESWSFALALRLGAFSLLRADGTDPVLMLDDVFAELDRRRRTALAAVAASAEQVLITAAVPEDVPAELAAVRFGVRAEDTDRGRLSALTALD…	417	20	1.1e-290	0.97	/data/input/nr_20241120.dmnd																			KOS58083.1 recombinase RecF [Rhodococcus rhodochrous KG-21]/DNA replication/repair protein RecF [Rhodococcus rhodochrous]	Rhodococcus rhodochrous KG-21/Rhodococcus rhodochrous	1.1e-290	417	417	1	417	1	417	417	1	1	1	1	0		WP_054370840;WP_054370840	798	recF	1441923	WP_054370840
ENBDON_00003	DNA replication/repair protein RecF	MYVRTFSLRDFRSWEAVSLNLAPGPTVFLGRNGHGKTNLLEALGYLSTLTSHRVSGDAPLLRTGTSRALVGAVVVNGGRELGIDVEINEGRPNRGRINQSPTRRPREILGILRTVLFAPEDLSLVRGDPGDRRRFLDELLATRIPRMSGVRADYDKVLRQRSALLKTAGGALRRGSRSGDGANALATLDVWDGHLAAHGSELLAARVALLHELAPHVAEAYRSIAPESRPALLRYRSTVGEALPPEFADPDRAPLSDDREVIEAAFLTRLAQARPKEIERGVCLVGPHRDELDLILGDQPAKGFASHGESWSFALALRLGAFSLLRADGTDPVLMLDDVFAELDRRRRTALAAVAASAEQVLITAAVPEDVPAELAAVRFGVRAEDTDRGRLSALTALD…	417	20	1.1e-290	0.97	/data/input/nr_20241120.dmnd																			KOS58083.1 recombinase RecF [Rhodococcus rhodochrous KG-21]/DNA replication/repair protein RecF [Rhodococcus rhodochrous]	Rhodococcus rhodochrous KG-21/Rhodococcus rhodochrous	1.1e-290	417	417	1	417	1	417	417	1	1	1	1	0		WP_054370840;WP_054370840	798	recF	1830	WP_040273103
ENBDON_00003	DNA replication/repair protein RecF	MYVRTFSLRDFRSWEAVSLNLAPGPTVFLGRNGHGKTNLLEALGYLSTLTSHRVSGDAPLLRTGTSRALVGAVVVNGGRELGIDVEINEGRPNRGRINQSPTRRPREILGILRTVLFAPEDLSLVRGDPGDRRRFLDELLATRIPRMSGVRADYDKVLRQRSALLKTAGGALRRGSRSGDGANALATLDVWDGHLAAHGSELLAARVALLHELAPHVAEAYRSIAPESRPALLRYRSTVGEALPPEFADPDRAPLSDDREVIEAAFLTRLAQARPKEIERGVCLVGPHRDELDLILGDQPAKGFASHGESWSFALALRLGAFSLLRADGTDPVLMLDDVFAELDRRRRTALAAVAASAEQVLITAAVPEDVPAELAAVRFGVRAEDTDRGRLSALTALD…	417	20	1.1e-290	0.97	/data/input/nr_20241120.dmnd																			KOS58083.1 recombinase RecF [Rhodococcus rhodochrous KG-21]/DNA replication/repair protein RecF [Rhodococcus rhodochrous]	Rhodococcus rhodochrous KG-21/Rhodococcus rhodochrous	1.1e-290	417	417	1	417	1	417	417	1	1	1	1	0		WP_054370840;WP_054370840	798	recF	191292	WP_006934464
ENBDON_00003	DNA replication/repair protein RecF	MYVRTFSLRDFRSWEAVSLNLAPGPTVFLGRNGHGKTNLLEALGYLSTLTSHRVSGDAPLLRTGTSRALVGAVVVNGGRELGIDVEINEGRPNRGRINQSPTRRPREILGILRTVLFAPEDLSLVRGDPGDRRRFLDELLATRIPRMSGVRADYDKVLRQRSALLKTAGGALRRGSRSGDGANALATLDVWDGHLAAHGSELLAARVALLHELAPHVAEAYRSIAPESRPALLRYRSTVGEALPPEFADPDRAPLSDDREVIEAAFLTRLAQARPKEIERGVCLVGPHRDELDLILGDQPAKGFASHGESWSFALALRLGAFSLLRADGTDPVLMLDDVFAELDRRRRTALAAVAASAEQVLITAAVPEDVPAELAAVRFGVRAEDTDRGRLSALTALD…	417	20	1.1e-290	0.97	/data/input/nr_20241120.dmnd																			KOS58083.1 recombinase RecF [Rhodococcus rhodochrous KG-21]/DNA replication/repair protein RecF [Rhodococcus rhodochrous]	Rhodococcus rhodochrous KG-21/Rhodococcus rhodochrous	1.1e-290	417	417	1	417	1	417	417	1	1	1	1	0		WP_054370840;WP_054370840	798	recF	1278076	WP_003936644
ENBDON_00003	DNA replication/repair protein RecF	MYVRTFSLRDFRSWEAVSLNLAPGPTVFLGRNGHGKTNLLEALGYLSTLTSHRVSGDAPLLRTGTSRALVGAVVVNGGRELGIDVEINEGRPNRGRINQSPTRRPREILGILRTVLFAPEDLSLVRGDPGDRRRFLDELLATRIPRMSGVRADYDKVLRQRSALLKTAGGALRRGSRSGDGANALATLDVWDGHLAAHGSELLAARVALLHELAPHVAEAYRSIAPESRPALLRYRSTVGEALPPEFADPDRAPLSDDREVIEAAFLTRLAQARPKEIERGVCLVGPHRDELDLILGDQPAKGFASHGESWSFALALRLGAFSLLRADGTDPVLMLDDVFAELDRRRRTALAAVAASAEQVLITAAVPEDVPAELAAVRFGVRAEDTDRGRLSALTALD…	417	20	1.1e-290	0.97	/data/input/nr_20241120.dmnd																			KOS58083.1 recombinase RecF [Rhodococcus rhodochrous KG-21]/DNA replication/repair protein RecF [Rhodococcus rhodochrous]	Rhodococcus rhodochrous KG-21/Rhodococcus rhodochrous	1.1e-290	417	417	1	417	1	417	417	1	1	1	1	0		WP_054370840;WP_054370840	798	recF	1278076	WP_003936644
ENBDON_00003	DNA replication/repair protein RecF	MYVRTFSLRDFRSWEAVSLNLAPGPTVFLGRNGHGKTNLLEALGYLSTLTSHRVSGDAPLLRTGTSRALVGAVVVNGGRELGIDVEINEGRPNRGRINQSPTRRPREILGILRTVLFAPEDLSLVRGDPGDRRRFLDELLATRIPRMSGVRADYDKVLRQRSALLKTAGGALRRGSRSGDGANALATLDVWDGHLAAHGSELLAARVALLHELAPHVAEAYRSIAPESRPALLRYRSTVGEALPPEFADPDRAPLSDDREVIEAAFLTRLAQARPKEIERGVCLVGPHRDELDLILGDQPAKGFASHGESWSFALALRLGAFSLLRADGTDPVLMLDDVFAELDRRRRTALAAVAASAEQVLITAAVPEDVPAELAAVRFGVRAEDTDRGRLSALTALD…	417	20	1.1e-290	0.97	/data/input/nr_20241120.dmnd																			KOS58083.1 recombinase RecF [Rhodococcus rhodochrous KG-21]/DNA replication/repair protein RecF [Rhodococcus rhodochrous]	Rhodococcus rhodochrous KG-21/Rhodococcus rhodochrous	1.1e-290	417	417	1	417	1	417	417	1	1	1	1	0		WP_054370840;WP_054370840	798	recF	1441923	WP_054370840
ENBDON_00003	DNA replication/repair protein RecF	MYVRTFSLRDFRSWEAVSLNLAPGPTVFLGRNGHGKTNLLEALGYLSTLTSHRVSGDAPLLRTGTSRALVGAVVVNGGRELGIDVEINEGRPNRGRINQSPTRRPREILGILRTVLFAPEDLSLVRGDPGDRRRFLDELLATRIPRMSGVRADYDKVLRQRSALLKTAGGALRRGSRSGDGANALATLDVWDGHLAAHGSELLAARVALLHELAPHVAEAYRSIAPESRPALLRYRSTVGEALPPEFADPDRAPLSDDREVIEAAFLTRLAQARPKEIERGVCLVGPHRDELDLILGDQPAKGFASHGESWSFALALRLGAFSLLRADGTDPVLMLDDVFAELDRRRRTALAAVAASAEQVLITAAVPEDVPAELAAVRFGVRAEDTDRGRLSALTALD…	417	20	1.1e-290	0.97	/data/input/nr_20241120.dmnd																			KOS58083.1 recombinase RecF [Rhodococcus rhodochrous KG-21]/DNA replication/repair protein RecF [Rhodococcus rhodochrous]	Rhodococcus rhodochrous KG-21/Rhodococcus rhodochrous	1.1e-290	417	417	1	417	1	417	417	1	1	1	1	0		WP_054370840;WP_054370840	798	recF	191292	WP_006934464
ENBDON_00003	DNA replication/repair protein RecF	MYVRTFSLRDFRSWEAVSLNLAPGPTVFLGRNGHGKTNLLEALGYLSTLTSHRVSGDAPLLRTGTSRALVGAVVVNGGRELGIDVEINEGRPNRGRINQSPTRRPREILGILRTVLFAPEDLSLVRGDPGDRRRFLDELLATRIPRMSGVRADYDKVLRQRSALLKTAGGALRRGSRSGDGANALATLDVWDGHLAAHGSELLAARVALLHELAPHVAEAYRSIAPESRPALLRYRSTVGEALPPEFADPDRAPLSDDREVIEAAFLTRLAQARPKEIERGVCLVGPHRDELDLILGDQPAKGFASHGESWSFALALRLGAFSLLRADGTDPVLMLDDVFAELDRRRRTALAAVAASAEQVLITAAVPEDVPAELAAVRFGVRAEDTDRGRLSALTALD…	417	20	1.1e-290	0.97	/data/input/nr_20241120.dmnd																			KOS58083.1 recombinase RecF [Rhodococcus rhodochrous KG-21]/DNA replication/repair protein RecF [Rhodococcus rhodochrous]	Rhodococcus rhodochrous KG-21/Rhodococcus rhodochrous	1.1e-290	417	417	1	417	1	417	417	1	1	1	1	0		WP_054370840;WP_054370840	798	recF	1441923	WP_054370840
ENBDON_00003	DNA replication/repair protein RecF	MYVRTFSLRDFRSWEAVSLNLAPGPTVFLGRNGHGKTNLLEALGYLSTLTSHRVSGDAPLLRTGTSRALVGAVVVNGGRELGIDVEINEGRPNRGRINQSPTRRPREILGILRTVLFAPEDLSLVRGDPGDRRRFLDELLATRIPRMSGVRADYDKVLRQRSALLKTAGGALRRGSRSGDGANALATLDVWDGHLAAHGSELLAARVALLHELAPHVAEAYRSIAPESRPALLRYRSTVGEALPPEFADPDRAPLSDDREVIEAAFLTRLAQARPKEIERGVCLVGPHRDELDLILGDQPAKGFASHGESWSFALALRLGAFSLLRADGTDPVLMLDDVFAELDRRRRTALAAVAASAEQVLITAAVPEDVPAELAAVRFGVRAEDTDRGRLSALTALD…	417	20	1.1e-290	0.97	/data/input/nr_20241120.dmnd																			KOS58083.1 recombinase RecF [Rhodococcus rhodochrous KG-21]/DNA replication/repair protein RecF [Rhodococcus rhodochrous]	Rhodococcus rhodochrous KG-21/Rhodococcus rhodochrous	1.1e-290	417	417	1	417	1	417	417	1	1	1	1	0		WP_054370840;WP_054370840	798	recF	1278076	WP_003936644
ENBDON_00003	DNA replication/repair protein RecF	MYVRTFSLRDFRSWEAVSLNLAPGPTVFLGRNGHGKTNLLEALGYLSTLTSHRVSGDAPLLRTGTSRALVGAVVVNGGRELGIDVEINEGRPNRGRINQSPTRRPREILGILRTVLFAPEDLSLVRGDPGDRRRFLDELLATRIPRMSGVRADYDKVLRQRSALLKTAGGALRRGSRSGDGANALATLDVWDGHLAAHGSELLAARVALLHELAPHVAEAYRSIAPESRPALLRYRSTVGEALPPEFADPDRAPLSDDREVIEAAFLTRLAQARPKEIERGVCLVGPHRDELDLILGDQPAKGFASHGESWSFALALRLGAFSLLRADGTDPVLMLDDVFAELDRRRRTALAAVAASAEQVLITAAVPEDVPAELAAVRFGVRAEDTDRGRLSALTALD…	417	20	1.1e-290	0.97	/data/input/nr_20241120.dmnd																			KOS58083.1 recombinase RecF [Rhodococcus rhodochrous KG-21]/DNA replication/repair protein RecF [Rhodococcus rhodochrous]	Rhodococcus rhodochrous KG-21/Rhodococcus rhodochrous	1.1e-290	417	417	1	417	1	417	417	1	1	1	1	0		WP_054370840;WP_054370840	798	recF	1278076	WP_003936644
ENBDON_00003	DNA replication/repair protein RecF	MYVRTFSLRDFRSWEAVSLNLAPGPTVFLGRNGHGKTNLLEALGYLSTLTSHRVSGDAPLLRTGTSRALVGAVVVNGGRELGIDVEINEGRPNRGRINQSPTRRPREILGILRTVLFAPEDLSLVRGDPGDRRRFLDELLATRIPRMSGVRADYDKVLRQRSALLKTAGGALRRGSRSGDGANALATLDVWDGHLAAHGSELLAARVALLHELAPHVAEAYRSIAPESRPALLRYRSTVGEALPPEFADPDRAPLSDDREVIEAAFLTRLAQARPKEIERGVCLVGPHRDELDLILGDQPAKGFASHGESWSFALALRLGAFSLLRADGTDPVLMLDDVFAELDRRRRTALAAVAASAEQVLITAAVPEDVPAELAAVRFGVRAEDTDRGRLSALTALD…	417	20	1.1e-290	0.97	/data/input/nr_20241120.dmnd																			KOS58083.1 recombinase RecF [Rhodococcus rhodochrous KG-21]/DNA replication/repair protein RecF [Rhodococcus rhodochrous]	Rhodococcus rhodochrous KG-21/Rhodococcus rhodochrous	1.1e-290	417	417	1	417	1	417	417	1	1	1	1	0		WP_054370840;WP_054370840	798	recF	1830	WP_040273103
ENBDON_00003	DNA replication/repair protein RecF	MYVRTFSLRDFRSWEAVSLNLAPGPTVFLGRNGHGKTNLLEALGYLSTLTSHRVSGDAPLLRTGTSRALVGAVVVNGGRELGIDVEINEGRPNRGRINQSPTRRPREILGILRTVLFAPEDLSLVRGDPGDRRRFLDELLATRIPRMSGVRADYDKVLRQRSALLKTAGGALRRGSRSGDGANALATLDVWDGHLAAHGSELLAARVALLHELAPHVAEAYRSIAPESRPALLRYRSTVGEALPPEFADPDRAPLSDDREVIEAAFLTRLAQARPKEIERGVCLVGPHRDELDLILGDQPAKGFASHGESWSFALALRLGAFSLLRADGTDPVLMLDDVFAELDRRRRTALAAVAASAEQVLITAAVPEDVPAELAAVRFGVRAEDTDRGRLSALTALD…	417	20	1.1e-290	0.97	/data/input/nr_20241120.dmnd																			KOS58083.1 recombinase RecF [Rhodococcus rhodochrous KG-21]/DNA replication/repair protein RecF [Rhodococcus rhodochrous]	Rhodococcus rhodochrous KG-21/Rhodococcus rhodochrous	1.1e-290	417	417	1	417	1	417	417	1	1	1	1	0		WP_054370840;WP_054370840	798	recF	191292	WP_006934464
ENBDON_00004	DUF721 family protein	MSIENPDEQPSQPPLRGIDLARRALEEARAAAQASGKSVGQGRASRGALRPRRRRRGWSGPGPDDRDPQPLGALTNAIAKQRGWVGRVSEGTVLGSWARVVGDDIASHATPTTLRDKVLHVSAESTAWATQLRMMQAQILAKIAAAVGHGVVEELRITGPTAPSWRKGERHVRGRGPRDTYG	182	20	2.2e-120	0.9512	/data/input/nr_20241120.dmnd	DUF721 family protein [Rhodococcus rhodochrous]/KOS58084.1 hypothetical protein Z051_00425 [Rhodococcus rhodochrous KG-21]	Rhodococcus rhodochrous/Rhodococcus rhodochrous KG-21	2.2e-120	182	182	1	182	1	182	182	1	1	1	1	0		WP_054370842/WP_054370842	348	DUF721 family protein [Rhodococcus rhodochrous]/KOS58084.1 hypothetical protein Z051_00425 [Rhodococcus rhodochrous KG-21]	Rhodococcus rhodochrous KG-21/Rhodococcus rhodochrous	2.2e-120	182	182	1	182	1	182	182	1	1	1	1	0		WP_054370842;WP_054370842	348
ENBDON_00004	DUF721 family protein	MSIENPDEQPSQPPLRGIDLARRALEEARAAAQASGKSVGQGRASRGALRPRRRRRGWSGPGPDDRDPQPLGALTNAIAKQRGWVGRVSEGTVLGSWARVVGDDIASHATPTTLRDKVLHVSAESTAWATQLRMMQAQILAKIAAAVGHGVVEELRITGPTAPSWRKGERHVRGRGPRDTYG	182	20	2.2e-120	0.9512	/data/input/nr_20241120.dmnd	MULTISPECIES: DUF721 family protein [Rhodococcus]/EME64452.1 hypothetical protein G352_12754 [Rhodococcus ruber BKS 20-38]/MDM7489161.1 DUF721 family protein [Rhodococcus indonesiensis]	Rhodococcus/Rhodococcus ruber BKS 20-38/Rhodococcus indonesiensis	9e-120	182	182	1	182	1	182	181	0.9945	1	1	1	0		WP_003936643/WP_003936643/WP_003936643	347	DUF721 family protein [Rhodococcus rhodochrous]/KOS58084.1 hypothetical protein Z051_00425 [Rhodococcus rhodochrous KG-21]	Rhodococcus rhodochrous KG-21/Rhodococcus rhodochrous	2.2e-120	182	182	1	182	1	182	182	1	1	1	1	0		WP_054370842;WP_054370842	348
ENBDON_00004	DUF721 family protein	MSIENPDEQPSQPPLRGIDLARRALEEARAAAQASGKSVGQGRASRGALRPRRRRRGWSGPGPDDRDPQPLGALTNAIAKQRGWVGRVSEGTVLGSWARVVGDDIASHATPTTLRDKVLHVSAESTAWATQLRMMQAQILAKIAAAVGHGVVEELRITGPTAPSWRKGERHVRGRGPRDTYG	182	20	2.2e-120	0.9512	/data/input/nr_20241120.dmnd	MULTISPECIES: DUF721 family protein [Rhodococcus]/MDO2379395.1 DUF721 family protein [Rhodococcus ruber]/RIK10856.1 MAG: DUF721 domain-containing protein [Acidobacteriota bacterium]/ATQ30112.1 hypothetical protein CS378_16085 [Rhodococcus ruber]/AUM19133.1 DUF721 domain-containing protein [Rhodococcus ruber]/AWG97088.1 DUF721 domain-containing protein [Rhodococcus ruber]	Rhodococcus/Rhodococcus ruber/Acidobacteriota bacterium/Rhodococcus ruber/Rhodococcus ruber/Rhodococcus ruber	3.7e-119	182	182	1	182	1	182	181	0.9945	1	1	1	0		WP_010595443/WP_010595443/WP_010595443	345	DUF721 family protein [Rhodococcus rhodochrous]/KOS58084.1 hypothetical protein Z051_00425 [Rhodococcus rhodochrous KG-21]	Rhodococcus rhodochrous KG-21/Rhodococcus rhodochrous	2.2e-120	182	182	1	182	1	182	182	1	1	1	1	0		WP_054370842;WP_054370842	348
ENBDON_00004	DUF721 family protein	MSIENPDEQPSQPPLRGIDLARRALEEARAAAQASGKSVGQGRASRGALRPRRRRRGWSGPGPDDRDPQPLGALTNAIAKQRGWVGRVSEGTVLGSWARVVGDDIASHATPTTLRDKVLHVSAESTAWATQLRMMQAQILAKIAAAVGHGVVEELRITGPTAPSWRKGERHVRGRGPRDTYG	182	20	2.2e-120	0.9512	/data/input/nr_20241120.dmnd	MULTISPECIES: DUF721 family protein [Rhodococcus]/ETT26606.1 UPF0232 protein [Rhodococcus rhodochrous ATCC 21198]/AKE87882.1 hypothetical protein AAT18_00020 [Rhodococcus aetherivorans]/ANZ27480.1 hypothetical protein A4U64_24500 [Rhodococcus sp. WB1]/MBC2590269.1 DUF721 family protein [Rhodococcus aetherivorans]/MDV6293284.1 DUF721 family protein [Rhodococcus aetherivorans]	Rhodococcus/Rhodococcus rhodochrous ATCC 21198/Rhodococcus aetherivorans/Rhodococcus sp. WB1/Rhodococcus aetherivorans/Rhodococcus aetherivorans	2.2e-111	182	182	1	182	1	182	176	0.967	1	1	1	0		WP_043799108/WP_043799108/WP_043799108/WP_043799108	325	DUF721 family protein [Rhodococcus rhodochrous]/KOS58084.1 hypothetical protein Z051_00425 [Rhodococcus rhodochrous KG-21]	Rhodococcus rhodochrous KG-21/Rhodococcus rhodochrous	2.2e-120	182	182	1	182	1	182	182	1	1	1	1	0		WP_054370842;WP_054370842	348
ENBDON_00004	DUF721 family protein	MSIENPDEQPSQPPLRGIDLARRALEEARAAAQASGKSVGQGRASRGALRPRRRRRGWSGPGPDDRDPQPLGALTNAIAKQRGWVGRVSEGTVLGSWARVVGDDIASHATPTTLRDKVLHVSAESTAWATQLRMMQAQILAKIAAAVGHGVVEELRITGPTAPSWRKGERHVRGRGPRDTYG	182	20	2.2e-120	0.9512	/data/input/nr_20241120.dmnd	MULTISPECIES: DUF721 family protein [Rhodococcus]/NCL77107.1 hypothetical protein [Rhodococcus sp. YH1]/KDE11419.1 hypothetical protein N505_0124605 [Rhodococcus aetherivorans]/OLL19881.1 hypothetical protein BKE56_007720 [Rhodococcus sp. M8]/QPG43723.1 DUF721 family protein [Rhodococcus sp. M8]/UGQ41317.1 DUF721 family protein [Rhodococcus aetherivorans]	Rhodococcus/Rhodococcus sp. YH1/Rhodococcus aetherivorans/Rhodococcus sp. M8/Rhodococcus sp. M8/Rhodococcus aetherivorans	7.3e-110	182	182	1	182	1	182	175	0.9615	1	1	1	0		WP_006934465/WP_006934465/WP_006934465/WP_006934465	322	DUF721 family protein [Rhodococcus rhodochrous]/KOS58084.1 hypothetical protein Z051_00425 [Rhodococcus rhodochrous KG-21]	Rhodococcus rhodochrous KG-21/Rhodococcus rhodochrous	2.2e-120	182	182	1	182	1	182	182	1	1	1	1	0		WP_054370842;WP_054370842	348
ENBDON_00004	DUF721 family protein	MSIENPDEQPSQPPLRGIDLARRALEEARAAAQASGKSVGQGRASRGALRPRRRRRGWSGPGPDDRDPQPLGALTNAIAKQRGWVGRVSEGTVLGSWARVVGDDIASHATPTTLRDKVLHVSAESTAWATQLRMMQAQILAKIAAAVGHGVVEELRITGPTAPSWRKGERHVRGRGPRDTYG	182	20	2.2e-120	0.9512	/data/input/nr_20241120.dmnd	DUF721 family protein [Rhodococcus sp. 14C212]/NGP05616.1 DUF721 family protein [Rhodococcus sp. 14C212]	Rhodococcus sp. 14C212/Rhodococcus sp. 14C212	8.3e-109	181	182	1	181	1	182	175	0.9615	1.0055	1	1	0		WP_165037342	319	DUF721 family protein [Rhodococcus rhodochrous]/KOS58084.1 hypothetical protein Z051_00425 [Rhodococcus rhodochrous KG-21]	Rhodococcus rhodochrous KG-21/Rhodococcus rhodochrous	2.2e-120	182	182	1	182	1	182	182	1	1	1	1	0		WP_054370842;WP_054370842	348
ENBDON_00004	DUF721 family protein	MSIENPDEQPSQPPLRGIDLARRALEEARAAAQASGKSVGQGRASRGALRPRRRRRGWSGPGPDDRDPQPLGALTNAIAKQRGWVGRVSEGTVLGSWARVVGDDIASHATPTTLRDKVLHVSAESTAWATQLRMMQAQILAKIAAAVGHGVVEELRITGPTAPSWRKGERHVRGRGPRDTYG	182	20	2.2e-120	0.9512	/data/input/nr_20241120.dmnd	MULTISPECIES: DUF721 family protein [unclassified Rhodococcus (in: high G+C Gram-positive bacteria)]/MBH0123303.1 DUF721 family protein [Rhodococcus sp. CX]	unclassified Rhodococcus (in: high G+C Gram-positive bacteria)/Rhodococcus sp. CX	5.3e-102	188	182	8	188	1	182	170	0.9341	0.9681	1	1	0		WP_197257105/WP_197257105	302	DUF721 family protein [Rhodococcus rhodochrous]/KOS58084.1 hypothetical protein Z051_00425 [Rhodococcus rhodochrous KG-21]	Rhodococcus rhodochrous KG-21/Rhodococcus rhodochrous	2.2e-120	182	182	1	182	1	182	182	1	1	1	1	0		WP_054370842;WP_054370842	348
ENBDON_00004	DUF721 family protein	MSIENPDEQPSQPPLRGIDLARRALEEARAAAQASGKSVGQGRASRGALRPRRRRRGWSGPGPDDRDPQPLGALTNAIAKQRGWVGRVSEGTVLGSWARVVGDDIASHATPTTLRDKVLHVSAESTAWATQLRMMQAQILAKIAAAVGHGVVEELRITGPTAPSWRKGERHVRGRGPRDTYG	182	20	2.2e-120	0.9512	/data/input/nr_20241120.dmnd	DUF721 family protein [Rhodococcus zopfii]	Rhodococcus zopfii	1.9e-101	184	181	5	184	2	182	171	0.9448	0.9837	0.9945	1	0		MDV2477856	300	DUF721 family protein [Rhodococcus rhodochrous]/KOS58084.1 hypothetical protein Z051_00425 [Rhodococcus rhodochrous KG-21]	Rhodococcus rhodochrous KG-21/Rhodococcus rhodochrous	2.2e-120	182	182	1	182	1	182	182	1	1	1	1	0		WP_054370842;WP_054370842	348
ENBDON_00004	DUF721 family protein	MSIENPDEQPSQPPLRGIDLARRALEEARAAAQASGKSVGQGRASRGALRPRRRRRGWSGPGPDDRDPQPLGALTNAIAKQRGWVGRVSEGTVLGSWARVVGDDIASHATPTTLRDKVLHVSAESTAWATQLRMMQAQILAKIAAAVGHGVVEELRITGPTAPSWRKGERHVRGRGPRDTYG	182	20	2.2e-120	0.9512	/data/input/nr_20241120.dmnd	DUF721 family protein [Rhodococcus zopfii]	Rhodococcus zopfii	2.2e-101	188	181	9	188	2	182	171	0.9448	0.9628	0.9945	1	0		WP_072808916	300	DUF721 family protein [Rhodococcus rhodochrous]/KOS58084.1 hypothetical protein Z051_00425 [Rhodococcus rhodochrous KG-21]	Rhodococcus rhodochrous KG-21/Rhodococcus rhodochrous	2.2e-120	182	182	1	182	1	182	182	1	1	1	1	0		WP_054370842;WP_054370842	348
ENBDON_00004	DUF721 family protein	MSIENPDEQPSQPPLRGIDLARRALEEARAAAQASGKSVGQGRASRGALRPRRRRRGWSGPGPDDRDPQPLGALTNAIAKQRGWVGRVSEGTVLGSWARVVGDDIASHATPTTLRDKVLHVSAESTAWATQLRMMQAQILAKIAAAVGHGVVEELRITGPTAPSWRKGERHVRGRGPRDTYG	182	20	2.2e-120	0.9512	/data/input/nr_20241120.dmnd	DUF721 family protein [Rhodococcus phenolicus]	Rhodococcus phenolicus	1.3e-100	188	188	1	188	1	182	168	0.8936	1	1.033	1	0		WP_068159202	298	DUF721 family protein [Rhodococcus rhodochrous]/KOS58084.1 hypothetical protein Z051_00425 [Rhodococcus rhodochrous KG-21]	Rhodococcus rhodochrous KG-21/Rhodococcus rhodochrous	2.2e-120	182	182	1	182	1	182	182	1	1	1	1	0		WP_054370842;WP_054370842	348
ENBDON_00004	DUF721 family protein	MSIENPDEQPSQPPLRGIDLARRALEEARAAAQASGKSVGQGRASRGALRPRRRRRGWSGPGPDDRDPQPLGALTNAIAKQRGWVGRVSEGTVLGSWARVVGDDIASHATPTTLRDKVLHVSAESTAWATQLRMMQAQILAKIAAAVGHGVVEELRITGPTAPSWRKGERHVRGRGPRDTYG	182	20	2.2e-120	0.9512	/data/input/nr_20241120.dmnd	DUF721 family protein [Rhodococcus sp. HM1]	Rhodococcus sp. HM1	3.6e-100	168	168	1	168	15	182	162	0.9643	1	0.9231	1	0		MCK8672159	296	DUF721 family protein [Rhodococcus rhodochrous]/KOS58084.1 hypothetical protein Z051_00425 [Rhodococcus rhodochrous KG-21]	Rhodococcus rhodochrous KG-21/Rhodococcus rhodochrous	2.2e-120	182	182	1	182	1	182	182	1	1	1	1	0		WP_054370842;WP_054370842	348
ENBDON_00004	DUF721 family protein	MSIENPDEQPSQPPLRGIDLARRALEEARAAAQASGKSVGQGRASRGALRPRRRRRGWSGPGPDDRDPQPLGALTNAIAKQRGWVGRVSEGTVLGSWARVVGDDIASHATPTTLRDKVLHVSAESTAWATQLRMMQAQILAKIAAAVGHGVVEELRITGPTAPSWRKGERHVRGRGPRDTYG	182	20	2.2e-120	0.9512	/data/input/nr_20241120.dmnd	DUF721 family protein [Rhodococcus coprophilus]/MBM7458817.1 putative nucleic acid-binding Zn ribbon protein [Rhodococcus coprophilus]/SQI33586.1 Zn-ribbon-containing, possibly RNA-binding protein and truncated derivatives [Rhodococcus coprophilus]	Rhodococcus coprophilus/Rhodococcus coprophilus/Rhodococcus coprophilus	6.5e-100	185	174	12	185	9	182	164	0.9425	0.9405	0.956	1	0		WP_072701126	296	DUF721 family protein [Rhodococcus rhodochrous]/KOS58084.1 hypothetical protein Z051_00425 [Rhodococcus rhodochrous KG-21]	Rhodococcus rhodochrous KG-21/Rhodococcus rhodochrous	2.2e-120	182	182	1	182	1	182	182	1	1	1	1	0		WP_054370842;WP_054370842	348
ENBDON_00004	DUF721 family protein	MSIENPDEQPSQPPLRGIDLARRALEEARAAAQASGKSVGQGRASRGALRPRRRRRGWSGPGPDDRDPQPLGALTNAIAKQRGWVGRVSEGTVLGSWARVVGDDIASHATPTTLRDKVLHVSAESTAWATQLRMMQAQILAKIAAAVGHGVVEELRITGPTAPSWRKGERHVRGRGPRDTYG	182	20	2.2e-120	0.9512	/data/input/nr_20241120.dmnd	MULTISPECIES: DUF721 family protein [unclassified Rhodococcus (in: high G+C Gram-positive bacteria)]/MBF0663418.1 DUF721 family protein [Rhodococcus sp. (in: high G+C Gram-positive bacteria)]/NMD95618.1 DUF721 family protein [Rhodococcus sp. BL-253-APC-6A1W]/NME79614.1 DUF721 family protein [Rhodococcus sp. 105337]	unclassified Rhodococcus (in: high G+C Gram-positive bacteria)/Rhodococcus sp. (in: high G+C Gram-positive bacteria)/Rhodococcus sp. BL-253-APC-6A1W/Rhodococcus sp. 105337	1.5e-98	185	171	15	185	12	182	162	0.9474	0.9243	0.9396	1	0		WP_169620896/WP_169620896/WP_169620896/WP_169620896	293	DUF721 family protein [Rhodococcus rhodochrous]/KOS58084.1 hypothetical protein Z051_00425 [Rhodococcus rhodochrous KG-21]	Rhodococcus rhodochrous KG-21/Rhodococcus rhodochrous	2.2e-120	182	182	1	182	1	182	182	1	1	1	1	0		WP_054370842;WP_054370842	348
ENBDON_00004	DUF721 family protein	MSIENPDEQPSQPPLRGIDLARRALEEARAAAQASGKSVGQGRASRGALRPRRRRRGWSGPGPDDRDPQPLGALTNAIAKQRGWVGRVSEGTVLGSWARVVGDDIASHATPTTLRDKVLHVSAESTAWATQLRMMQAQILAKIAAAVGHGVVEELRITGPTAPSWRKGERHVRGRGPRDTYG	182	20	2.2e-120	0.9512	/data/input/nr_20241120.dmnd	DUF721 family protein [Rhodococcus sp. CC-R104]/MEE2031749.1 DUF721 family protein [Rhodococcus sp. CC-R104]	Rhodococcus sp. CC-R104/Rhodococcus sp. CC-R104	1.5e-98	185	179	7	185	4	182	168	0.9385	0.9676	0.9835	1	0		WP_330151199	293	DUF721 family protein [Rhodococcus rhodochrous]/KOS58084.1 hypothetical protein Z051_00425 [Rhodococcus rhodochrous KG-21]	Rhodococcus rhodochrous KG-21/Rhodococcus rhodochrous	2.2e-120	182	182	1	182	1	182	182	1	1	1	1	0		WP_054370842;WP_054370842	348
ENBDON_00004	DUF721 family protein	MSIENPDEQPSQPPLRGIDLARRALEEARAAAQASGKSVGQGRASRGALRPRRRRRGWSGPGPDDRDPQPLGALTNAIAKQRGWVGRVSEGTVLGSWARVVGDDIASHATPTTLRDKVLHVSAESTAWATQLRMMQAQILAKIAAAVGHGVVEELRITGPTAPSWRKGERHVRGRGPRDTYG	182	20	2.2e-120	0.9512	/data/input/nr_20241120.dmnd	DUF721 family protein [Rhodococcus sp. CH91]	Rhodococcus sp. CH91	1.6e-98	186	184	3	186	7	182	166	0.9022	0.9892	1.011	1	0		WP_241383548	293	DUF721 family protein [Rhodococcus rhodochrous]/KOS58084.1 hypothetical protein Z051_00425 [Rhodococcus rhodochrous KG-21]	Rhodococcus rhodochrous KG-21/Rhodococcus rhodochrous	2.2e-120	182	182	1	182	1	182	182	1	1	1	1	0		WP_054370842;WP_054370842	348
ENBDON_00004	DUF721 family protein	MSIENPDEQPSQPPLRGIDLARRALEEARAAAQASGKSVGQGRASRGALRPRRRRRGWSGPGPDDRDPQPLGALTNAIAKQRGWVGRVSEGTVLGSWARVVGDDIASHATPTTLRDKVLHVSAESTAWATQLRMMQAQILAKIAAAVGHGVVEELRITGPTAPSWRKGERHVRGRGPRDTYG	182	20	2.2e-120	0.9512	/data/input/nr_20241120.dmnd	DUF721 family protein [Rhodococcus gordoniae]/UTT48659.1 DUF721 family protein [Rhodococcus gordoniae]/SUE16054.1 Zn-ribbon-containing, possibly RNA-binding protein and truncated derivatives [Rhodococcus gordoniae]	Rhodococcus gordoniae/Rhodococcus gordoniae/Rhodococcus gordoniae	3e-98	184	172	13	184	11	182	163	0.9477	0.9348	0.9451	1	0		WP_064064249	292	DUF721 family protein [Rhodococcus rhodochrous]/KOS58084.1 hypothetical protein Z051_00425 [Rhodococcus rhodochrous KG-21]	Rhodococcus rhodochrous KG-21/Rhodococcus rhodochrous	2.2e-120	182	182	1	182	1	182	182	1	1	1	1	0		WP_054370842;WP_054370842	348
ENBDON_00004	DUF721 family protein	MSIENPDEQPSQPPLRGIDLARRALEEARAAAQASGKSVGQGRASRGALRPRRRRRGWSGPGPDDRDPQPLGALTNAIAKQRGWVGRVSEGTVLGSWARVVGDDIASHATPTTLRDKVLHVSAESTAWATQLRMMQAQILAKIAAAVGHGVVEELRITGPTAPSWRKGERHVRGRGPRDTYG	182	20	2.2e-120	0.9512	/data/input/nr_20241120.dmnd	DUF721 family protein [Rhodococcus rhodochrous]/MCD2097700.1 DUF721 family protein [Rhodococcus rhodochrous]/MCD2121999.1 DUF721 family protein [Rhodococcus rhodochrous]/MCQ4135012.1 DUF721 family protein [Rhodococcus rhodochrous]/MDJ0018863.1 DUF721 family protein [Rhodococcus rhodochrous]/MXQ78201.1 DUF721 family protein [Rhodococcus rhodochrous]	Rhodococcus rhodochrous/Rhodococcus rhodochrous/Rhodococcus rhodochrous/Rhodococcus rhodochrous/Rhodococcus rhodochrous/Rhodococcus rhodochrous	7.4e-98	190	171	20	190	12	182	162	0.9474	0.9	0.9396	1	0		WP_160877075	291	DUF721 family protein [Rhodococcus rhodochrous]/KOS58084.1 hypothetical protein Z051_00425 [Rhodococcus rhodochrous KG-21]	Rhodococcus rhodochrous KG-21/Rhodococcus rhodochrous	2.2e-120	182	182	1	182	1	182	182	1	1	1	1	0		WP_054370842;WP_054370842	348
ENBDON_00004	DUF721 family protein	MSIENPDEQPSQPPLRGIDLARRALEEARAAAQASGKSVGQGRASRGALRPRRRRRGWSGPGPDDRDPQPLGALTNAIAKQRGWVGRVSEGTVLGSWARVVGDDIASHATPTTLRDKVLHVSAESTAWATQLRMMQAQILAKIAAAVGHGVVEELRITGPTAPSWRKGERHVRGRGPRDTYG	182	20	2.2e-120	0.9512	/data/input/nr_20241120.dmnd	DUF721 family protein [Rhodococcus sp. R1101]	Rhodococcus sp. R1101	8.6e-98	184	172	13	184	11	182	163	0.9477	0.9348	0.9451	1	0		WP_016931522	291	DUF721 family protein [Rhodococcus rhodochrous]/KOS58084.1 hypothetical protein Z051_00425 [Rhodococcus rhodochrous KG-21]	Rhodococcus rhodochrous KG-21/Rhodococcus rhodochrous	2.2e-120	182	182	1	182	1	182	182	1	1	1	1	0		WP_054370842;WP_054370842	348
ENBDON_00004	DUF721 family protein	MSIENPDEQPSQPPLRGIDLARRALEEARAAAQASGKSVGQGRASRGALRPRRRRRGWSGPGPDDRDPQPLGALTNAIAKQRGWVGRVSEGTVLGSWARVVGDDIASHATPTTLRDKVLHVSAESTAWATQLRMMQAQILAKIAAAVGHGVVEELRITGPTAPSWRKGERHVRGRGPRDTYG	182	20	2.2e-120	0.9512	/data/input/nr_20241120.dmnd	DUF721 family protein [Rhodococcus sp. Q1]	Rhodococcus sp. Q1	8.6e-98	184	172	13	184	11	182	163	0.9477	0.9348	0.9451	1	0		WP_129975063	291	DUF721 family protein [Rhodococcus rhodochrous]/KOS58084.1 hypothetical protein Z051_00425 [Rhodococcus rhodochrous KG-21]	Rhodococcus rhodochrous KG-21/Rhodococcus rhodochrous	2.2e-120	182	182	1	182	1	182	182	1	1	1	1	0		WP_054370842;WP_054370842	348
ENBDON_00004	DUF721 family protein	MSIENPDEQPSQPPLRGIDLARRALEEARAAAQASGKSVGQGRASRGALRPRRRRRGWSGPGPDDRDPQPLGALTNAIAKQRGWVGRVSEGTVLGSWARVVGDDIASHATPTTLRDKVLHVSAESTAWATQLRMMQAQILAKIAAAVGHGVVEELRITGPTAPSWRKGERHVRGRGPRDTYG	182	20	2.2e-120	0.9512	/data/input/nr_20241120.dmnd	DUF721 family protein [Rhodococcus artemisiae]/MEE2057909.1 DUF721 family protein [Rhodococcus artemisiae]	Rhodococcus artemisiae/Rhodococcus artemisiae	1.8e-97	185	172	14	185	11	182	162	0.9419	0.9297	0.9451	1	0		WP_330133157	290	DUF721 family protein [Rhodococcus rhodochrous]/KOS58084.1 hypothetical protein Z051_00425 [Rhodococcus rhodochrous KG-21]	Rhodococcus rhodochrous KG-21/Rhodococcus rhodochrous	2.2e-120	182	182	1	182	1	182	182	1	1	1	1	0		WP_054370842;WP_054370842	348
ENBDON_00005	MULTISPECIES: metal-dependent hydrolase	MSTSLTEPDRVLLQARDVEFDWSALPLHWVPGDPFSTHVLNVLHLLLPAGEEWFVETFKEALPLIRDEQLREDVVGFIGQESVHADAHRRVLEQLEAKGLDPTPFTDQMRWLFGRLLGRRPLTGLRAENYLVERLAIIAAVEHVTAFLGDWVLNAKGLDAAGTDPTMLDLLRWHGAEEVEHRSVAYDVMRYFDPGEARRIRTQLIVAPVLLWLWIRGARFLMAHDPVLAAAPGHARAPHLSDWSAASRRGTMPGPVDLGRRMSRYFRRSYHPSQEGSTAQAVRYLASSPAARAAAR	296	20	1.1e-215	0.9337	/data/input/nr_20241120.dmnd	MULTISPECIES: metal-dependent hydrolase [Rhodococcus]/KOS58085.1 metal-dependent hydrolase [Rhodococcus rhodochrous KG-21]/MDM7489162.1 metal-dependent hydrolase [Rhodococcus indonesiensis]	Rhodococcus/Rhodococcus rhodochrous KG-21/Rhodococcus indonesiensis	1.1e-215	296	296	1	296	1	296	296	1	1	1	1	0		WP_054370845/WP_054370845/WP_054370845	598	MULTISPECIES: metal-dependent hydrolase [Rhodococcus]/KOS58085.1 metal-dependent hydrolase [Rhodococcus rhodochrous KG-21]/MDM7489162.1 metal-dependent hydrolase [Rhodococcus indonesiensis]	Rhodococcus rhodochrous KG-21/Rhodococcus/Rhodococcus indonesiensis	1.1e-215	296	296	1	296	1	296	296	1	1	1	1	0		WP_054370845;WP_054370845;WP_054370845	598	G352_12749	1278076	WP_003936642		GO:0016787-IEA	hydrolase activity-IEA
ENBDON_00005	MULTISPECIES: metal-dependent hydrolase	MSTSLTEPDRVLLQARDVEFDWSALPLHWVPGDPFSTHVLNVLHLLLPAGEEWFVETFKEALPLIRDEQLREDVVGFIGQESVHADAHRRVLEQLEAKGLDPTPFTDQMRWLFGRLLGRRPLTGLRAENYLVERLAIIAAVEHVTAFLGDWVLNAKGLDAAGTDPTMLDLLRWHGAEEVEHRSVAYDVMRYFDPGEARRIRTQLIVAPVLLWLWIRGARFLMAHDPVLAAAPGHARAPHLSDWSAASRRGTMPGPVDLGRRMSRYFRRSYHPSQEGSTAQAVRYLASSPAARAAAR	296	20	1.1e-215	0.9337	/data/input/nr_20241120.dmnd	metal-dependent hydrolase [Rhodococcus ruber]/EME64451.1 metal-dependent hydrolase [Rhodococcus ruber BKS 20-38]	Rhodococcus ruber/Rhodococcus ruber BKS 20-38	3.8e-214	296	296	1	296	1	296	295	0.9966	1	1	1	0		WP_003936642/WP_003936642	595	MULTISPECIES: metal-dependent hydrolase [Rhodococcus]/KOS58085.1 metal-dependent hydrolase [Rhodococcus rhodochrous KG-21]/MDM7489162.1 metal-dependent hydrolase [Rhodococcus indonesiensis]	Rhodococcus rhodochrous KG-21/Rhodococcus/Rhodococcus indonesiensis	1.1e-215	296	296	1	296	1	296	296	1	1	1	1	0		WP_054370845;WP_054370845;WP_054370845	598	Z051_00430	1441923	WP_054370845
ENBDON_00005	MULTISPECIES: metal-dependent hydrolase	MSTSLTEPDRVLLQARDVEFDWSALPLHWVPGDPFSTHVLNVLHLLLPAGEEWFVETFKEALPLIRDEQLREDVVGFIGQESVHADAHRRVLEQLEAKGLDPTPFTDQMRWLFGRLLGRRPLTGLRAENYLVERLAIIAAVEHVTAFLGDWVLNAKGLDAAGTDPTMLDLLRWHGAEEVEHRSVAYDVMRYFDPGEARRIRTQLIVAPVLLWLWIRGARFLMAHDPVLAAAPGHARAPHLSDWSAASRRGTMPGPVDLGRRMSRYFRRSYHPSQEGSTAQAVRYLASSPAARAAAR	296	20	1.1e-215	0.9337	/data/input/nr_20241120.dmnd	MULTISPECIES: metal-dependent hydrolase [Rhodococcus]/MDO2379396.1 metal-dependent hydrolase [Rhodococcus ruber]/MDX5452945.1 metal-dependent hydrolase [Rhodococcus sp. (in: high G+C Gram-positive bacteria)]/RIK10855.1 MAG: metal-dependent hydrolase [Acidobacteriota bacterium]/ATQ30113.1 metal-dependent hydrolase [Rhodococcus ruber]/AWG97089.1 metal-dependent hydrolase [Rhodococcus ruber]	Rhodococcus/Rhodococcus ruber/Rhodococcus sp. (in: high G+C Gram-positive bacteria)/Acidobacteriota bacterium/Rhodococcus ruber/Rhodococcus ruber	4.8e-208	296	296	1	296	1	296	291	0.9831	1	1	1	0		WP_010595444/WP_010595444/WP_010595444/WP_010595444	579	MULTISPECIES: metal-dependent hydrolase [Rhodococcus]/KOS58085.1 metal-dependent hydrolase [Rhodococcus rhodochrous KG-21]/MDM7489162.1 metal-dependent hydrolase [Rhodococcus indonesiensis]	Rhodococcus rhodochrous KG-21/Rhodococcus/Rhodococcus indonesiensis	1.1e-215	296	296	1	296	1	296	296	1	1	1	1	0		WP_054370845;WP_054370845;WP_054370845	598	OCS65_01210	191292	WP_006934466
ENBDON_00005	MULTISPECIES: metal-dependent hydrolase	MSTSLTEPDRVLLQARDVEFDWSALPLHWVPGDPFSTHVLNVLHLLLPAGEEWFVETFKEALPLIRDEQLREDVVGFIGQESVHADAHRRVLEQLEAKGLDPTPFTDQMRWLFGRLLGRRPLTGLRAENYLVERLAIIAAVEHVTAFLGDWVLNAKGLDAAGTDPTMLDLLRWHGAEEVEHRSVAYDVMRYFDPGEARRIRTQLIVAPVLLWLWIRGARFLMAHDPVLAAAPGHARAPHLSDWSAASRRGTMPGPVDLGRRMSRYFRRSYHPSQEGSTAQAVRYLASSPAARAAAR	296	20	1.1e-215	0.9337	/data/input/nr_20241120.dmnd	MULTISPECIES: metal-dependent hydrolase [Rhodococcus]/AUM19134.1 metal-dependent hydrolase [Rhodococcus ruber]/MBD8055139.1 metal-dependent hydrolase [Rhodococcus ruber]	Rhodococcus/Rhodococcus ruber/Rhodococcus ruber	1.9e-207	296	296	1	296	1	296	290	0.9797	1	1	1	0		WP_102031792/WP_102031792	578	MULTISPECIES: metal-dependent hydrolase [Rhodococcus]/KOS58085.1 metal-dependent hydrolase [Rhodococcus rhodochrous KG-21]/MDM7489162.1 metal-dependent hydrolase [Rhodococcus indonesiensis]	Rhodococcus rhodochrous KG-21/Rhodococcus/Rhodococcus indonesiensis	1.1e-215	296	296	1	296	1	296	296	1	1	1	1	0		WP_054370845;WP_054370845;WP_054370845	598
ENBDON_00005	MULTISPECIES: metal-dependent hydrolase	MSTSLTEPDRVLLQARDVEFDWSALPLHWVPGDPFSTHVLNVLHLLLPAGEEWFVETFKEALPLIRDEQLREDVVGFIGQESVHADAHRRVLEQLEAKGLDPTPFTDQMRWLFGRLLGRRPLTGLRAENYLVERLAIIAAVEHVTAFLGDWVLNAKGLDAAGTDPTMLDLLRWHGAEEVEHRSVAYDVMRYFDPGEARRIRTQLIVAPVLLWLWIRGARFLMAHDPVLAAAPGHARAPHLSDWSAASRRGTMPGPVDLGRRMSRYFRRSYHPSQEGSTAQAVRYLASSPAARAAAR	296	20	1.1e-215	0.9337	/data/input/nr_20241120.dmnd	metal-dependent hydrolase [Rhodococcus sp. 14C212]/NGP05617.1 metal-dependent hydrolase [Rhodococcus sp. 14C212]	Rhodococcus sp. 14C212/Rhodococcus sp. 14C212	1.7e-201	296	296	1	296	1	296	285	0.9628	1	1	1	0		WP_165037343	563	MULTISPECIES: metal-dependent hydrolase [Rhodococcus]/KOS58085.1 metal-dependent hydrolase [Rhodococcus rhodochrous KG-21]/MDM7489162.1 metal-dependent hydrolase [Rhodococcus indonesiensis]	Rhodococcus rhodochrous KG-21/Rhodococcus/Rhodococcus indonesiensis	1.1e-215	296	296	1	296	1	296	296	1	1	1	1	0		WP_054370845;WP_054370845;WP_054370845	598
ENBDON_00005	MULTISPECIES: metal-dependent hydrolase	MSTSLTEPDRVLLQARDVEFDWSALPLHWVPGDPFSTHVLNVLHLLLPAGEEWFVETFKEALPLIRDEQLREDVVGFIGQESVHADAHRRVLEQLEAKGLDPTPFTDQMRWLFGRLLGRRPLTGLRAENYLVERLAIIAAVEHVTAFLGDWVLNAKGLDAAGTDPTMLDLLRWHGAEEVEHRSVAYDVMRYFDPGEARRIRTQLIVAPVLLWLWIRGARFLMAHDPVLAAAPGHARAPHLSDWSAASRRGTMPGPVDLGRRMSRYFRRSYHPSQEGSTAQAVRYLASSPAARAAAR	296	20	1.1e-215	0.9337	/data/input/nr_20241120.dmnd	metal-dependent hydrolase [Rhodococcus rhodochrous]	Rhodococcus rhodochrous	8.1e-200	296	296	1	296	1	296	282	0.9527	1	1	1	0		OOL30040	558	MULTISPECIES: metal-dependent hydrolase [Rhodococcus]/KOS58085.1 metal-dependent hydrolase [Rhodococcus rhodochrous KG-21]/MDM7489162.1 metal-dependent hydrolase [Rhodococcus indonesiensis]	Rhodococcus rhodochrous KG-21/Rhodococcus/Rhodococcus indonesiensis	1.1e-215	296	296	1	296	1	296	296	1	1	1	1	0		WP_054370845;WP_054370845;WP_054370845	598
ENBDON_00005	MULTISPECIES: metal-dependent hydrolase	MSTSLTEPDRVLLQARDVEFDWSALPLHWVPGDPFSTHVLNVLHLLLPAGEEWFVETFKEALPLIRDEQLREDVVGFIGQESVHADAHRRVLEQLEAKGLDPTPFTDQMRWLFGRLLGRRPLTGLRAENYLVERLAIIAAVEHVTAFLGDWVLNAKGLDAAGTDPTMLDLLRWHGAEEVEHRSVAYDVMRYFDPGEARRIRTQLIVAPVLLWLWIRGARFLMAHDPVLAAAPGHARAPHLSDWSAASRRGTMPGPVDLGRRMSRYFRRSYHPSQEGSTAQAVRYLASSPAARAAAR	296	20	1.1e-215	0.9337	/data/input/nr_20241120.dmnd	metal-dependent hydrolase [Rhodococcus aetherivorans]/UGQ41316.1 metal-dependent hydrolase [Rhodococcus aetherivorans]	Rhodococcus aetherivorans/Rhodococcus aetherivorans	1.3e-198	296	296	1	296	1	296	280	0.9459	1	1	1	0		WP_231772228	555	MULTISPECIES: metal-dependent hydrolase [Rhodococcus]/KOS58085.1 metal-dependent hydrolase [Rhodococcus rhodochrous KG-21]/MDM7489162.1 metal-dependent hydrolase [Rhodococcus indonesiensis]	Rhodococcus rhodochrous KG-21/Rhodococcus/Rhodococcus indonesiensis	1.1e-215	296	296	1	296	1	296	296	1	1	1	1	0		WP_054370845;WP_054370845;WP_054370845	598
ENBDON_00005	MULTISPECIES: metal-dependent hydrolase	MSTSLTEPDRVLLQARDVEFDWSALPLHWVPGDPFSTHVLNVLHLLLPAGEEWFVETFKEALPLIRDEQLREDVVGFIGQESVHADAHRRVLEQLEAKGLDPTPFTDQMRWLFGRLLGRRPLTGLRAENYLVERLAIIAAVEHVTAFLGDWVLNAKGLDAAGTDPTMLDLLRWHGAEEVEHRSVAYDVMRYFDPGEARRIRTQLIVAPVLLWLWIRGARFLMAHDPVLAAAPGHARAPHLSDWSAASRRGTMPGPVDLGRRMSRYFRRSYHPSQEGSTAQAVRYLASSPAARAAAR	296	20	1.1e-215	0.9337	/data/input/nr_20241120.dmnd	MULTISPECIES: metal-dependent hydrolase [Rhodococcus]/ETT26605.1 putative conserved protein UCP07580 [Rhodococcus rhodochrous ATCC 21198]/NCL77106.1 hypothetical protein [Rhodococcus sp. YH1]/AKE87883.1 metal-dependent hydrolase [Rhodococcus aetherivorans]/ANZ27479.1 metal-dependent hydrolase [Rhodococcus sp. WB1]/KDE11420.1 metal-dependent hydrolase [Rhodococcus aetherivorans]	Rhodococcus/Rhodococcus rhodochrous ATCC 21198/Rhodococcus sp. YH1/Rhodococcus aetherivorans/Rhodococcus sp. WB1/Rhodococcus aetherivorans	1.9e-198	296	296	1	296	1	296	280	0.9459	1	1	1	0		WP_029546805/WP_029546805/WP_029546805/WP_029546805/WP_029546805	555	MULTISPECIES: metal-dependent hydrolase [Rhodococcus]/KOS58085.1 metal-dependent hydrolase [Rhodococcus rhodochrous KG-21]/MDM7489162.1 metal-dependent hydrolase [Rhodococcus indonesiensis]	Rhodococcus rhodochrous KG-21/Rhodococcus/Rhodococcus indonesiensis	1.1e-215	296	296	1	296	1	296	296	1	1	1	1	0		WP_054370845;WP_054370845;WP_054370845	598
ENBDON_00005	MULTISPECIES: metal-dependent hydrolase	MSTSLTEPDRVLLQARDVEFDWSALPLHWVPGDPFSTHVLNVLHLLLPAGEEWFVETFKEALPLIRDEQLREDVVGFIGQESVHADAHRRVLEQLEAKGLDPTPFTDQMRWLFGRLLGRRPLTGLRAENYLVERLAIIAAVEHVTAFLGDWVLNAKGLDAAGTDPTMLDLLRWHGAEEVEHRSVAYDVMRYFDPGEARRIRTQLIVAPVLLWLWIRGARFLMAHDPVLAAAPGHARAPHLSDWSAASRRGTMPGPVDLGRRMSRYFRRSYHPSQEGSTAQAVRYLASSPAARAAAR	296	20	1.1e-215	0.9337	/data/input/nr_20241120.dmnd	MULTISPECIES: metal-dependent hydrolase [Rhodococcus]/PND49914.1 metal-dependent hydrolase [Rhodococcus sp. ENV425]/UYF94425.1 metal-dependent hydrolase [Rhodococcus aetherivorans]/WKW98773.1 metal-dependent hydrolase [Rhodococcus aetherivorans]/CCW10979.1 FIG00998484: hypothetical protein [Rhodococcus aetherivorans]	Rhodococcus/Rhodococcus sp. ENV425/Rhodococcus aetherivorans/Rhodococcus aetherivorans/Rhodococcus aetherivorans	2.7e-198	296	296	1	296	1	296	280	0.9459	1	1	1	0		WP_006934466/WP_006934466/WP_006934466	555	MULTISPECIES: metal-dependent hydrolase [Rhodococcus]/KOS58085.1 metal-dependent hydrolase [Rhodococcus rhodochrous KG-21]/MDM7489162.1 metal-dependent hydrolase [Rhodococcus indonesiensis]	Rhodococcus rhodochrous KG-21/Rhodococcus/Rhodococcus indonesiensis	1.1e-215	296	296	1	296	1	296	296	1	1	1	1	0		WP_054370845;WP_054370845;WP_054370845	598
ENBDON_00005	MULTISPECIES: metal-dependent hydrolase	MSTSLTEPDRVLLQARDVEFDWSALPLHWVPGDPFSTHVLNVLHLLLPAGEEWFVETFKEALPLIRDEQLREDVVGFIGQESVHADAHRRVLEQLEAKGLDPTPFTDQMRWLFGRLLGRRPLTGLRAENYLVERLAIIAAVEHVTAFLGDWVLNAKGLDAAGTDPTMLDLLRWHGAEEVEHRSVAYDVMRYFDPGEARRIRTQLIVAPVLLWLWIRGARFLMAHDPVLAAAPGHARAPHLSDWSAASRRGTMPGPVDLGRRMSRYFRRSYHPSQEGSTAQAVRYLASSPAARAAAR	296	20	1.1e-215	0.9337	/data/input/nr_20241120.dmnd	metal-dependent hydrolase [Rhodococcus sp. 11-3]/USC15405.1 metal-dependent hydrolase [Rhodococcus sp. 11-3]	Rhodococcus sp. 11-3/Rhodococcus sp. 11-3	1.1e-197	296	296	1	296	1	296	280	0.9459	1	1	1	0		WP_251549970	553	MULTISPECIES: metal-dependent hydrolase [Rhodococcus]/KOS58085.1 metal-dependent hydrolase [Rhodococcus rhodochrous KG-21]/MDM7489162.1 metal-dependent hydrolase [Rhodococcus indonesiensis]	Rhodococcus rhodochrous KG-21/Rhodococcus/Rhodococcus indonesiensis	1.1e-215	296	296	1	296	1	296	296	1	1	1	1	0		WP_054370845;WP_054370845;WP_054370845	598
ENBDON_00005	MULTISPECIES: metal-dependent hydrolase	MSTSLTEPDRVLLQARDVEFDWSALPLHWVPGDPFSTHVLNVLHLLLPAGEEWFVETFKEALPLIRDEQLREDVVGFIGQESVHADAHRRVLEQLEAKGLDPTPFTDQMRWLFGRLLGRRPLTGLRAENYLVERLAIIAAVEHVTAFLGDWVLNAKGLDAAGTDPTMLDLLRWHGAEEVEHRSVAYDVMRYFDPGEARRIRTQLIVAPVLLWLWIRGARFLMAHDPVLAAAPGHARAPHLSDWSAASRRGTMPGPVDLGRRMSRYFRRSYHPSQEGSTAQAVRYLASSPAARAAAR	296	20	1.1e-215	0.9337	/data/input/nr_20241120.dmnd	MULTISPECIES: metal-dependent hydrolase [Rhodococcus]/MBC2590270.1 metal-dependent hydrolase [Rhodococcus aetherivorans]/QRI76811.1 metal-dependent hydrolase [Rhodococcus aetherivorans]/QSE60229.1 metal-dependent hydrolase [Rhodococcus sp. PSBB066]/QSE68466.1 metal-dependent hydrolase [Rhodococcus sp. PSBB049]/WFS11835.1 metal-dependent hydrolase [Rhodococcus aetherivorans]	Rhodococcus/Rhodococcus aetherivorans/Rhodococcus aetherivorans/Rhodococcus sp. PSBB066/Rhodococcus sp. PSBB049/Rhodococcus aetherivorans	1.1e-197	296	296	1	296	1	296	279	0.9426	1	1	1	0		WP_185713363/WP_185713363/WP_185713363/WP_185713363	553	MULTISPECIES: metal-dependent hydrolase [Rhodococcus]/KOS58085.1 metal-dependent hydrolase [Rhodococcus rhodochrous KG-21]/MDM7489162.1 metal-dependent hydrolase [Rhodococcus indonesiensis]	Rhodococcus rhodochrous KG-21/Rhodococcus/Rhodococcus indonesiensis	1.1e-215	296	296	1	296	1	296	296	1	1	1	1	0		WP_054370845;WP_054370845;WP_054370845	598
ENBDON_00005	MULTISPECIES: metal-dependent hydrolase	MSTSLTEPDRVLLQARDVEFDWSALPLHWVPGDPFSTHVLNVLHLLLPAGEEWFVETFKEALPLIRDEQLREDVVGFIGQESVHADAHRRVLEQLEAKGLDPTPFTDQMRWLFGRLLGRRPLTGLRAENYLVERLAIIAAVEHVTAFLGDWVLNAKGLDAAGTDPTMLDLLRWHGAEEVEHRSVAYDVMRYFDPGEARRIRTQLIVAPVLLWLWIRGARFLMAHDPVLAAAPGHARAPHLSDWSAASRRGTMPGPVDLGRRMSRYFRRSYHPSQEGSTAQAVRYLASSPAARAAAR	296	20	1.1e-215	0.9337	/data/input/nr_20241120.dmnd	metal-dependent hydrolase [Rhodococcus sp. HNM0563]/NLU64100.1 metal-dependent hydrolase [Rhodococcus sp. HNM0563]	Rhodococcus sp. HNM0563/Rhodococcus sp. HNM0563	8.1e-181	293	289	5	293	8	296	265	0.917	0.9863	0.9764	1	0		WP_169689652	510	MULTISPECIES: metal-dependent hydrolase [Rhodococcus]/KOS58085.1 metal-dependent hydrolase [Rhodococcus rhodochrous KG-21]/MDM7489162.1 metal-dependent hydrolase [Rhodococcus indonesiensis]	Rhodococcus rhodochrous KG-21/Rhodococcus/Rhodococcus indonesiensis	1.1e-215	296	296	1	296	1	296	296	1	1	1	1	0		WP_054370845;WP_054370845;WP_054370845	598
ENBDON_00005	MULTISPECIES: metal-dependent hydrolase	MSTSLTEPDRVLLQARDVEFDWSALPLHWVPGDPFSTHVLNVLHLLLPAGEEWFVETFKEALPLIRDEQLREDVVGFIGQESVHADAHRRVLEQLEAKGLDPTPFTDQMRWLFGRLLGRRPLTGLRAENYLVERLAIIAAVEHVTAFLGDWVLNAKGLDAAGTDPTMLDLLRWHGAEEVEHRSVAYDVMRYFDPGEARRIRTQLIVAPVLLWLWIRGARFLMAHDPVLAAAPGHARAPHLSDWSAASRRGTMPGPVDLGRRMSRYFRRSYHPSQEGSTAQAVRYLASSPAARAAAR	296	20	1.1e-215	0.9337	/data/input/nr_20241120.dmnd	metal-dependent hydrolase [Rhodococcus sp. F64268]/MCK0091762.1 metal-dependent hydrolase [Rhodococcus sp. F64268]	Rhodococcus sp. F64268/Rhodococcus sp. F64268	3.9e-179	293	289	5	293	8	296	263	0.91	0.9863	0.9764	1	0		WP_247274124	506	MULTISPECIES: metal-dependent hydrolase [Rhodococcus]/KOS58085.1 metal-dependent hydrolase [Rhodococcus rhodochrous KG-21]/MDM7489162.1 metal-dependent hydrolase [Rhodococcus indonesiensis]	Rhodococcus rhodochrous KG-21/Rhodococcus/Rhodococcus indonesiensis	1.1e-215	296	296	1	296	1	296	296	1	1	1	1	0		WP_054370845;WP_054370845;WP_054370845	598
ENBDON_00005	MULTISPECIES: metal-dependent hydrolase	MSTSLTEPDRVLLQARDVEFDWSALPLHWVPGDPFSTHVLNVLHLLLPAGEEWFVETFKEALPLIRDEQLREDVVGFIGQESVHADAHRRVLEQLEAKGLDPTPFTDQMRWLFGRLLGRRPLTGLRAENYLVERLAIIAAVEHVTAFLGDWVLNAKGLDAAGTDPTMLDLLRWHGAEEVEHRSVAYDVMRYFDPGEARRIRTQLIVAPVLLWLWIRGARFLMAHDPVLAAAPGHARAPHLSDWSAASRRGTMPGPVDLGRRMSRYFRRSYHPSQEGSTAQAVRYLASSPAARAAAR	296	20	1.1e-215	0.9337	/data/input/nr_20241120.dmnd	metal-dependent hydrolase [Rhodococcus artemisiae]/MEE2058597.1 metal-dependent hydrolase [Rhodococcus artemisiae]	Rhodococcus artemisiae/Rhodococcus artemisiae	6.3e-179	297	297	1	297	1	296	268	0.9024	1	1.0034	1	0		WP_330133835	506	MULTISPECIES: metal-dependent hydrolase [Rhodococcus]/KOS58085.1 metal-dependent hydrolase [Rhodococcus rhodochrous KG-21]/MDM7489162.1 metal-dependent hydrolase [Rhodococcus indonesiensis]	Rhodococcus rhodochrous KG-21/Rhodococcus/Rhodococcus indonesiensis	1.1e-215	296	296	1	296	1	296	296	1	1	1	1	0		WP_054370845;WP_054370845;WP_054370845	598
ENBDON_00005	MULTISPECIES: metal-dependent hydrolase	MSTSLTEPDRVLLQARDVEFDWSALPLHWVPGDPFSTHVLNVLHLLLPAGEEWFVETFKEALPLIRDEQLREDVVGFIGQESVHADAHRRVLEQLEAKGLDPTPFTDQMRWLFGRLLGRRPLTGLRAENYLVERLAIIAAVEHVTAFLGDWVLNAKGLDAAGTDPTMLDLLRWHGAEEVEHRSVAYDVMRYFDPGEARRIRTQLIVAPVLLWLWIRGARFLMAHDPVLAAAPGHARAPHLSDWSAASRRGTMPGPVDLGRRMSRYFRRSYHPSQEGSTAQAVRYLASSPAARAAAR	296	20	1.1e-215	0.9337	/data/input/nr_20241120.dmnd	metal-dependent hydrolase [Rhodococcus sp. (in: high G+C Gram-positive bacteria)]	Rhodococcus sp. (in: high G+C Gram-positive bacteria)	6.3e-179	297	297	1	297	1	296	266	0.8956	1	1.0034	1	0		HET8994823	506	MULTISPECIES: metal-dependent hydrolase [Rhodococcus]/KOS58085.1 metal-dependent hydrolase [Rhodococcus rhodochrous KG-21]/MDM7489162.1 metal-dependent hydrolase [Rhodococcus indonesiensis]	Rhodococcus rhodochrous KG-21/Rhodococcus/Rhodococcus indonesiensis	1.1e-215	296	296	1	296	1	296	296	1	1	1	1	0		WP_054370845;WP_054370845;WP_054370845	598
ENBDON_00005	MULTISPECIES: metal-dependent hydrolase	MSTSLTEPDRVLLQARDVEFDWSALPLHWVPGDPFSTHVLNVLHLLLPAGEEWFVETFKEALPLIRDEQLREDVVGFIGQESVHADAHRRVLEQLEAKGLDPTPFTDQMRWLFGRLLGRRPLTGLRAENYLVERLAIIAAVEHVTAFLGDWVLNAKGLDAAGTDPTMLDLLRWHGAEEVEHRSVAYDVMRYFDPGEARRIRTQLIVAPVLLWLWIRGARFLMAHDPVLAAAPGHARAPHLSDWSAASRRGTMPGPVDLGRRMSRYFRRSYHPSQEGSTAQAVRYLASSPAARAAAR	296	20	1.1e-215	0.9337	/data/input/nr_20241120.dmnd	metal-dependent hydrolase [Rhodococcus sp. SMB37]/TCN41231.1 hypothetical protein EV641_13314 [Rhodococcus sp. SMB37]	Rhodococcus sp. SMB37/Rhodococcus sp. SMB37	9.7e-178	295	293	3	295	6	296	266	0.9078	0.9932	0.9899	1	0		WP_132476899	503	MULTISPECIES: metal-dependent hydrolase [Rhodococcus]/KOS58085.1 metal-dependent hydrolase [Rhodococcus rhodochrous KG-21]/MDM7489162.1 metal-dependent hydrolase [Rhodococcus indonesiensis]	Rhodococcus rhodochrous KG-21/Rhodococcus/Rhodococcus indonesiensis	1.1e-215	296	296	1	296	1	296	296	1	1	1	1	0		WP_054370845;WP_054370845;WP_054370845	598
ENBDON_00005	MULTISPECIES: metal-dependent hydrolase	MSTSLTEPDRVLLQARDVEFDWSALPLHWVPGDPFSTHVLNVLHLLLPAGEEWFVETFKEALPLIRDEQLREDVVGFIGQESVHADAHRRVLEQLEAKGLDPTPFTDQMRWLFGRLLGRRPLTGLRAENYLVERLAIIAAVEHVTAFLGDWVLNAKGLDAAGTDPTMLDLLRWHGAEEVEHRSVAYDVMRYFDPGEARRIRTQLIVAPVLLWLWIRGARFLMAHDPVLAAAPGHARAPHLSDWSAASRRGTMPGPVDLGRRMSRYFRRSYHPSQEGSTAQAVRYLASSPAARAAAR	296	20	1.1e-215	0.9337	/data/input/nr_20241120.dmnd	metal-dependent hydrolase [Rhodococcus sp. (in: high G+C Gram-positive bacteria)]	Rhodococcus sp. (in: high G+C Gram-positive bacteria)	3.8e-176	309	291	19	309	6	296	258	0.8866	0.9417	0.9831	1	0		NLV80261	499	MULTISPECIES: metal-dependent hydrolase [Rhodococcus]/KOS58085.1 metal-dependent hydrolase [Rhodococcus rhodochrous KG-21]/MDM7489162.1 metal-dependent hydrolase [Rhodococcus indonesiensis]	Rhodococcus rhodochrous KG-21/Rhodococcus/Rhodococcus indonesiensis	1.1e-215	296	296	1	296	1	296	296	1	1	1	1	0		WP_054370845;WP_054370845;WP_054370845	598
ENBDON_00005	MULTISPECIES: metal-dependent hydrolase	MSTSLTEPDRVLLQARDVEFDWSALPLHWVPGDPFSTHVLNVLHLLLPAGEEWFVETFKEALPLIRDEQLREDVVGFIGQESVHADAHRRVLEQLEAKGLDPTPFTDQMRWLFGRLLGRRPLTGLRAENYLVERLAIIAAVEHVTAFLGDWVLNAKGLDAAGTDPTMLDLLRWHGAEEVEHRSVAYDVMRYFDPGEARRIRTQLIVAPVLLWLWIRGARFLMAHDPVLAAAPGHARAPHLSDWSAASRRGTMPGPVDLGRRMSRYFRRSYHPSQEGSTAQAVRYLASSPAARAAAR	296	20	1.1e-215	0.9337	/data/input/nr_20241120.dmnd	metal-dependent hydrolase [Rhodococcus yananensis]	Rhodococcus yananensis	8.8e-174	285	285	1	285	12	296	254	0.8912	1	0.9628	1	0		WP_226437033	492	MULTISPECIES: metal-dependent hydrolase [Rhodococcus]/KOS58085.1 metal-dependent hydrolase [Rhodococcus rhodochrous KG-21]/MDM7489162.1 metal-dependent hydrolase [Rhodococcus indonesiensis]	Rhodococcus rhodochrous KG-21/Rhodococcus/Rhodococcus indonesiensis	1.1e-215	296	296	1	296	1	296	296	1	1	1	1	0		WP_054370845;WP_054370845;WP_054370845	598
ENBDON_00005	MULTISPECIES: metal-dependent hydrolase	MSTSLTEPDRVLLQARDVEFDWSALPLHWVPGDPFSTHVLNVLHLLLPAGEEWFVETFKEALPLIRDEQLREDVVGFIGQESVHADAHRRVLEQLEAKGLDPTPFTDQMRWLFGRLLGRRPLTGLRAENYLVERLAIIAAVEHVTAFLGDWVLNAKGLDAAGTDPTMLDLLRWHGAEEVEHRSVAYDVMRYFDPGEARRIRTQLIVAPVLLWLWIRGARFLMAHDPVLAAAPGHARAPHLSDWSAASRRGTMPGPVDLGRRMSRYFRRSYHPSQEGSTAQAVRYLASSPAARAAAR	296	20	1.1e-215	0.9337	/data/input/nr_20241120.dmnd	metal-dependent hydrolase [Rhodococcus sp. (in: high G+C Gram-positive bacteria)]	Rhodococcus sp. (in: high G+C Gram-positive bacteria)	8.8e-174	285	285	1	285	12	296	254	0.8912	1	0.9628	1	0		WP_287220412	492	MULTISPECIES: metal-dependent hydrolase [Rhodococcus]/KOS58085.1 metal-dependent hydrolase [Rhodococcus rhodochrous KG-21]/MDM7489162.1 metal-dependent hydrolase [Rhodococcus indonesiensis]	Rhodococcus rhodochrous KG-21/Rhodococcus/Rhodococcus indonesiensis	1.1e-215	296	296	1	296	1	296	296	1	1	1	1	0		WP_054370845;WP_054370845;WP_054370845	598
ENBDON_00005	MULTISPECIES: metal-dependent hydrolase	MSTSLTEPDRVLLQARDVEFDWSALPLHWVPGDPFSTHVLNVLHLLLPAGEEWFVETFKEALPLIRDEQLREDVVGFIGQESVHADAHRRVLEQLEAKGLDPTPFTDQMRWLFGRLLGRRPLTGLRAENYLVERLAIIAAVEHVTAFLGDWVLNAKGLDAAGTDPTMLDLLRWHGAEEVEHRSVAYDVMRYFDPGEARRIRTQLIVAPVLLWLWIRGARFLMAHDPVLAAAPGHARAPHLSDWSAASRRGTMPGPVDLGRRMSRYFRRSYHPSQEGSTAQAVRYLASSPAARAAAR	296	20	1.1e-215	0.9337	/data/input/nr_20241120.dmnd	metal-dependent hydrolase [Rhodococcus sp. T2V]/MDF3309905.1 metal-dependent hydrolase [Rhodococcus sp. T2V]	Rhodococcus sp. T2V/Rhodococcus sp. T2V	6.4e-164	302	293	10	302	4	296	255	0.8703	0.9702	0.9899	1	0		WP_276141167	468	MULTISPECIES: metal-dependent hydrolase [Rhodococcus]/KOS58085.1 metal-dependent hydrolase [Rhodococcus rhodochrous KG-21]/MDM7489162.1 metal-dependent hydrolase [Rhodococcus indonesiensis]	Rhodococcus rhodochrous KG-21/Rhodococcus/Rhodococcus indonesiensis	1.1e-215	296	296	1	296	1	296	296	1	1	1	1	0		WP_054370845;WP_054370845;WP_054370845	598
ENBDON_00006	PDR/VanB family oxidoreductase	MTGLLPRHGRPSDLRGRNRPDRAMGVLGSVVDRYLSLVTTLDYAGAAGAADIDRQVDLLVAEKIPVTADGDVVRLTLRAPDGAELPAWHPGAHLDFHLPSGRRRQYSLCGDHEDRSRYTVAVRRIPGGGGGSLEMHALEPGDLVAVRGPRNGFPFVAEGTALFVAGGIGITPVLAMTRAAHRAGMDWRLVYTGRTRSAMPFLDEIGTWDSSRVFVRPDDEFGTPTGSDLLAGAPAGGAVYCCGPTPMLDAVRAGIDATPASALHFERFGAPPVVAGRAFEVQLASTGEVLAVPADESALEIIRRRLPGIGYSCRQGFCGTCRVRVLSGTPDHRENRLTPEERREEMLVCVSRADGGRLVLDL	362	20	4.8e-264	0.9563	/data/input/nr_20241120.dmnd	PDR/VanB family oxidoreductase [Rhodococcus rhodochrous]/KOS58086.1 ferredoxin [Rhodococcus rhodochrous KG-21]	Rhodococcus rhodochrous/Rhodococcus rhodochrous KG-21	4.8e-264	362	362	1	362	1	362	359	0.9917	1	1	1	0		WP_054370846/WP_054370846	726	PDR/VanB family oxidoreductase [Rhodococcus rhodochrous]/KOS58086.1 ferredoxin [Rhodococcus rhodochrous KG-21]	Rhodococcus rhodochrous KG-21/Rhodococcus rhodochrous	4.8e-264	362	362	1	362	1	362	359	0.9917	1	1	1	0		WP_054370846;WP_054370846	726	OCS65_01205	191292	WP_044475807		GO:0051213-IEA	dioxygenase activity-IEA
ENBDON_00006	PDR/VanB family oxidoreductase	MTGLLPRHGRPSDLRGRNRPDRAMGVLGSVVDRYLSLVTTLDYAGAAGAADIDRQVDLLVAEKIPVTADGDVVRLTLRAPDGAELPAWHPGAHLDFHLPSGRRRQYSLCGDHEDRSRYTVAVRRIPGGGGGSLEMHALEPGDLVAVRGPRNGFPFVAEGTALFVAGGIGITPVLAMTRAAHRAGMDWRLVYTGRTRSAMPFLDEIGTWDSSRVFVRPDDEFGTPTGSDLLAGAPAGGAVYCCGPTPMLDAVRAGIDATPASALHFERFGAPPVVAGRAFEVQLASTGEVLAVPADESALEIIRRRLPGIGYSCRQGFCGTCRVRVLSGTPDHRENRLTPEERREEMLVCVSRADGGRLVLDL	362	20	4.8e-264	0.9563	/data/input/nr_20241120.dmnd	PDR/VanB family oxidoreductase [Rhodococcus ruber]/EME64450.1 phthalate 4,5-dioxygenase [Rhodococcus ruber BKS 20-38]	Rhodococcus ruber/Rhodococcus ruber BKS 20-38	3.9e-263	362	362	1	362	1	362	358	0.989	1	1	1	0		WP_003936641/WP_003936641	724	PDR/VanB family oxidoreductase [Rhodococcus rhodochrous]/KOS58086.1 ferredoxin [Rhodococcus rhodochrous KG-21]	Rhodococcus rhodochrous KG-21/Rhodococcus rhodochrous	4.8e-264	362	362	1	362	1	362	359	0.9917	1	1	1	0		WP_054370846;WP_054370846	726	G352_12744	1278076	WP_003936641		GO:0016491-IEA	oxidoreductase activity-IEA
ENBDON_00006	PDR/VanB family oxidoreductase	MTGLLPRHGRPSDLRGRNRPDRAMGVLGSVVDRYLSLVTTLDYAGAAGAADIDRQVDLLVAEKIPVTADGDVVRLTLRAPDGAELPAWHPGAHLDFHLPSGRRRQYSLCGDHEDRSRYTVAVRRIPGGGGGSLEMHALEPGDLVAVRGPRNGFPFVAEGTALFVAGGIGITPVLAMTRAAHRAGMDWRLVYTGRTRSAMPFLDEIGTWDSSRVFVRPDDEFGTPTGSDLLAGAPAGGAVYCCGPTPMLDAVRAGIDATPASALHFERFGAPPVVAGRAFEVQLASTGEVLAVPADESALEIIRRRLPGIGYSCRQGFCGTCRVRVLSGTPDHRENRLTPEERREEMLVCVSRADGGRLVLDL	362	20	4.8e-264	0.9563	/data/input/nr_20241120.dmnd	PDR/VanB family oxidoreductase [Rhodococcus indonesiensis]/MDM7489163.1 PDR/VanB family oxidoreductase [Rhodococcus indonesiensis]	Rhodococcus indonesiensis/Rhodococcus indonesiensis	3.2e-262	362	362	1	362	1	362	358	0.989	1	1	1	0		WP_289379246	722	PDR/VanB family oxidoreductase [Rhodococcus rhodochrous]/KOS58086.1 ferredoxin [Rhodococcus rhodochrous KG-21]	Rhodococcus rhodochrous KG-21/Rhodococcus rhodochrous	4.8e-264	362	362	1	362	1	362	359	0.9917	1	1	1	0		WP_054370846;WP_054370846	726	Z051_00435	1441923	WP_054370846		GO:0051537-IEA	2 iron, 2 sulfur cluster binding-IEA
ENBDON_00006	PDR/VanB family oxidoreductase	MTGLLPRHGRPSDLRGRNRPDRAMGVLGSVVDRYLSLVTTLDYAGAAGAADIDRQVDLLVAEKIPVTADGDVVRLTLRAPDGAELPAWHPGAHLDFHLPSGRRRQYSLCGDHEDRSRYTVAVRRIPGGGGGSLEMHALEPGDLVAVRGPRNGFPFVAEGTALFVAGGIGITPVLAMTRAAHRAGMDWRLVYTGRTRSAMPFLDEIGTWDSSRVFVRPDDEFGTPTGSDLLAGAPAGGAVYCCGPTPMLDAVRAGIDATPASALHFERFGAPPVVAGRAFEVQLASTGEVLAVPADESALEIIRRRLPGIGYSCRQGFCGTCRVRVLSGTPDHRENRLTPEERREEMLVCVSRADGGRLVLDL	362	20	4.8e-264	0.9563	/data/input/nr_20241120.dmnd	PDR/VanB family oxidoreductase [Rhodococcus ruber]/KXF85735.1 ferredoxin [Rhodococcus ruber Chol-4]/QRE79145.1 oxidoreductase [Rhodococcus ruber]	Rhodococcus ruber/Rhodococcus ruber Chol-4/Rhodococcus ruber	6.9e-257	362	362	1	362	1	362	351	0.9696	1	1	1	0		WP_017681015/WP_017681015	708	PDR/VanB family oxidoreductase [Rhodococcus rhodochrous]/KOS58086.1 ferredoxin [Rhodococcus rhodochrous KG-21]	Rhodococcus rhodochrous KG-21/Rhodococcus rhodochrous	4.8e-264	362	362	1	362	1	362	359	0.9917	1	1	1	0		WP_054370846;WP_054370846	726	G352_12744	1278076	WP_003936641
ENBDON_00006	PDR/VanB family oxidoreductase	MTGLLPRHGRPSDLRGRNRPDRAMGVLGSVVDRYLSLVTTLDYAGAAGAADIDRQVDLLVAEKIPVTADGDVVRLTLRAPDGAELPAWHPGAHLDFHLPSGRRRQYSLCGDHEDRSRYTVAVRRIPGGGGGSLEMHALEPGDLVAVRGPRNGFPFVAEGTALFVAGGIGITPVLAMTRAAHRAGMDWRLVYTGRTRSAMPFLDEIGTWDSSRVFVRPDDEFGTPTGSDLLAGAPAGGAVYCCGPTPMLDAVRAGIDATPASALHFERFGAPPVVAGRAFEVQLASTGEVLAVPADESALEIIRRRLPGIGYSCRQGFCGTCRVRVLSGTPDHRENRLTPEERREEMLVCVSRADGGRLVLDL	362	20	4.8e-264	0.9563	/data/input/nr_20241120.dmnd	PDR/VanB family oxidoreductase [Rhodococcus ruber]/RQM34662.1 ferredoxin [Rhodococcus ruber]	Rhodococcus ruber/Rhodococcus ruber	2.8e-256	362	362	1	362	1	362	350	0.9669	1	1	1	0		WP_124258683	707	PDR/VanB family oxidoreductase [Rhodococcus rhodochrous]/KOS58086.1 ferredoxin [Rhodococcus rhodochrous KG-21]	Rhodococcus rhodochrous KG-21/Rhodococcus rhodochrous	4.8e-264	362	362	1	362	1	362	359	0.9917	1	1	1	0		WP_054370846;WP_054370846	726	RHRU231_590011	1830	WP_040273105
ENBDON_00006	PDR/VanB family oxidoreductase	MTGLLPRHGRPSDLRGRNRPDRAMGVLGSVVDRYLSLVTTLDYAGAAGAADIDRQVDLLVAEKIPVTADGDVVRLTLRAPDGAELPAWHPGAHLDFHLPSGRRRQYSLCGDHEDRSRYTVAVRRIPGGGGGSLEMHALEPGDLVAVRGPRNGFPFVAEGTALFVAGGIGITPVLAMTRAAHRAGMDWRLVYTGRTRSAMPFLDEIGTWDSSRVFVRPDDEFGTPTGSDLLAGAPAGGAVYCCGPTPMLDAVRAGIDATPASALHFERFGAPPVVAGRAFEVQLASTGEVLAVPADESALEIIRRRLPGIGYSCRQGFCGTCRVRVLSGTPDHRENRLTPEERREEMLVCVSRADGGRLVLDL	362	20	4.8e-264	0.9563	/data/input/nr_20241120.dmnd	MULTISPECIES: PDR/VanB family oxidoreductase [Rhodococcus]/ATQ30114.1 oxidoreductase [Rhodococcus ruber]/AUM19135.1 oxidoreductase [Rhodococcus ruber]/AXY49466.1 hypothetical protein YT1_0006 [Rhodococcus ruber]/MBD8055140.1 oxidoreductase [Rhodococcus ruber]/MCD2125294.1 PDR/VanB family oxidoreductase [Rhodococcus ruber]	Rhodococcus/Rhodococcus ruber/Rhodococcus ruber/Rhodococcus ruber/Rhodococcus ruber/Rhodococcus ruber	2.8e-256	362	362	1	362	1	362	351	0.9696	1	1	1	0		WP_040273105/WP_040273105	707	PDR/VanB family oxidoreductase [Rhodococcus rhodochrous]/KOS58086.1 ferredoxin [Rhodococcus rhodochrous KG-21]	Rhodococcus rhodochrous KG-21/Rhodococcus rhodochrous	4.8e-264	362	362	1	362	1	362	359	0.9917	1	1	1	0		WP_054370846;WP_054370846	726	G352_12744	1278076	WP_003936641
ENBDON_00006	PDR/VanB family oxidoreductase	MTGLLPRHGRPSDLRGRNRPDRAMGVLGSVVDRYLSLVTTLDYAGAAGAADIDRQVDLLVAEKIPVTADGDVVRLTLRAPDGAELPAWHPGAHLDFHLPSGRRRQYSLCGDHEDRSRYTVAVRRIPGGGGGSLEMHALEPGDLVAVRGPRNGFPFVAEGTALFVAGGIGITPVLAMTRAAHRAGMDWRLVYTGRTRSAMPFLDEIGTWDSSRVFVRPDDEFGTPTGSDLLAGAPAGGAVYCCGPTPMLDAVRAGIDATPASALHFERFGAPPVVAGRAFEVQLASTGEVLAVPADESALEIIRRRLPGIGYSCRQGFCGTCRVRVLSGTPDHRENRLTPEERREEMLVCVSRADGGRLVLDL	362	20	4.8e-264	0.9563	/data/input/nr_20241120.dmnd	MAG: oxidoreductase [Acidobacteriota bacterium]	Acidobacteriota bacterium	1.1e-255	362	362	1	362	1	362	350	0.9669	1	1	1	0		RIK10854	705	PDR/VanB family oxidoreductase [Rhodococcus rhodochrous]/KOS58086.1 ferredoxin [Rhodococcus rhodochrous KG-21]	Rhodococcus rhodochrous KG-21/Rhodococcus rhodochrous	4.8e-264	362	362	1	362	1	362	359	0.9917	1	1	1	0		WP_054370846;WP_054370846	726	HFP48_00030	2722825	WP_050034255
ENBDON_00006	PDR/VanB family oxidoreductase	MTGLLPRHGRPSDLRGRNRPDRAMGVLGSVVDRYLSLVTTLDYAGAAGAADIDRQVDLLVAEKIPVTADGDVVRLTLRAPDGAELPAWHPGAHLDFHLPSGRRRQYSLCGDHEDRSRYTVAVRRIPGGGGGSLEMHALEPGDLVAVRGPRNGFPFVAEGTALFVAGGIGITPVLAMTRAAHRAGMDWRLVYTGRTRSAMPFLDEIGTWDSSRVFVRPDDEFGTPTGSDLLAGAPAGGAVYCCGPTPMLDAVRAGIDATPASALHFERFGAPPVVAGRAFEVQLASTGEVLAVPADESALEIIRRRLPGIGYSCRQGFCGTCRVRVLSGTPDHRENRLTPEERREEMLVCVSRADGGRLVLDL	362	20	4.8e-264	0.9563	/data/input/nr_20241120.dmnd	PDR/VanB family oxidoreductase [Rhodococcus ruber]/MDO2379397.1 PDR/VanB family oxidoreductase [Rhodococcus ruber]	Rhodococcus ruber/Rhodococcus ruber	1.1e-255	362	362	1	362	1	362	351	0.9696	1	1	1	0		WP_304433994	705	PDR/VanB family oxidoreductase [Rhodococcus rhodochrous]/KOS58086.1 ferredoxin [Rhodococcus rhodochrous KG-21]	Rhodococcus rhodochrous KG-21/Rhodococcus rhodochrous	4.8e-264	362	362	1	362	1	362	359	0.9917	1	1	1	0		WP_054370846;WP_054370846	726	HFP48_00030	2722825	WP_050034255
ENBDON_00006	PDR/VanB family oxidoreductase	MTGLLPRHGRPSDLRGRNRPDRAMGVLGSVVDRYLSLVTTLDYAGAAGAADIDRQVDLLVAEKIPVTADGDVVRLTLRAPDGAELPAWHPGAHLDFHLPSGRRRQYSLCGDHEDRSRYTVAVRRIPGGGGGSLEMHALEPGDLVAVRGPRNGFPFVAEGTALFVAGGIGITPVLAMTRAAHRAGMDWRLVYTGRTRSAMPFLDEIGTWDSSRVFVRPDDEFGTPTGSDLLAGAPAGGAVYCCGPTPMLDAVRAGIDATPASALHFERFGAPPVVAGRAFEVQLASTGEVLAVPADESALEIIRRRLPGIGYSCRQGFCGTCRVRVLSGTPDHRENRLTPEERREEMLVCVSRADGGRLVLDL	362	20	4.8e-264	0.9563	/data/input/nr_20241120.dmnd	PDR/VanB family oxidoreductase [Rhodococcus ruber]/MBP2214170.1 ferredoxin-NADP reductase [Rhodococcus ruber]	Rhodococcus ruber/Rhodococcus ruber	2.3e-255	362	362	1	362	1	362	350	0.9669	1	1	1	0		WP_210063150	704	PDR/VanB family oxidoreductase [Rhodococcus rhodochrous]/KOS58086.1 ferredoxin [Rhodococcus rhodochrous KG-21]	Rhodococcus rhodochrous KG-21/Rhodococcus rhodochrous	4.8e-264	362	362	1	362	1	362	359	0.9917	1	1	1	0		WP_054370846;WP_054370846	726	RHRU231_590011	1830	WP_040273105
ENBDON_00006	PDR/VanB family oxidoreductase	MTGLLPRHGRPSDLRGRNRPDRAMGVLGSVVDRYLSLVTTLDYAGAAGAADIDRQVDLLVAEKIPVTADGDVVRLTLRAPDGAELPAWHPGAHLDFHLPSGRRRQYSLCGDHEDRSRYTVAVRRIPGGGGGSLEMHALEPGDLVAVRGPRNGFPFVAEGTALFVAGGIGITPVLAMTRAAHRAGMDWRLVYTGRTRSAMPFLDEIGTWDSSRVFVRPDDEFGTPTGSDLLAGAPAGGAVYCCGPTPMLDAVRAGIDATPASALHFERFGAPPVVAGRAFEVQLASTGEVLAVPADESALEIIRRRLPGIGYSCRQGFCGTCRVRVLSGTPDHRENRLTPEERREEMLVCVSRADGGRLVLDL	362	20	4.8e-264	0.9563	/data/input/nr_20241120.dmnd	PDR/VanB family oxidoreductase [Rhodococcus ruber]/QDC12624.1 2Fe-2S iron-sulfur cluster binding domain-containing protein [Rhodococcus ruber]	Rhodococcus ruber/Rhodococcus ruber	3.3e-255	362	362	1	362	1	362	349	0.9641	1	1	1	0		WP_140188129	704	PDR/VanB family oxidoreductase [Rhodococcus rhodochrous]/KOS58086.1 ferredoxin [Rhodococcus rhodochrous KG-21]	Rhodococcus rhodochrous KG-21/Rhodococcus rhodochrous	4.8e-264	362	362	1	362	1	362	359	0.9917	1	1	1	0		WP_054370846;WP_054370846	726	OCS65_01205	191292	WP_044475807
ENBDON_00006	PDR/VanB family oxidoreductase	MTGLLPRHGRPSDLRGRNRPDRAMGVLGSVVDRYLSLVTTLDYAGAAGAADIDRQVDLLVAEKIPVTADGDVVRLTLRAPDGAELPAWHPGAHLDFHLPSGRRRQYSLCGDHEDRSRYTVAVRRIPGGGGGSLEMHALEPGDLVAVRGPRNGFPFVAEGTALFVAGGIGITPVLAMTRAAHRAGMDWRLVYTGRTRSAMPFLDEIGTWDSSRVFVRPDDEFGTPTGSDLLAGAPAGGAVYCCGPTPMLDAVRAGIDATPASALHFERFGAPPVVAGRAFEVQLASTGEVLAVPADESALEIIRRRLPGIGYSCRQGFCGTCRVRVLSGTPDHRENRLTPEERREEMLVCVSRADGGRLVLDL	362	20	4.8e-264	0.9563	/data/input/nr_20241120.dmnd	MULTISPECIES: PDR/VanB family oxidoreductase [Rhodococcus]/AKE87884.1 ferredoxin [Rhodococcus aetherivorans]/ANZ27478.1 ferredoxin [Rhodococcus sp. WB1]/MBC2590271.1 oxidoreductase [Rhodococcus aetherivorans]/MDV6293286.1 PDR/VanB family oxidoreductase [Rhodococcus aetherivorans]/QIX48125.1 oxidoreductase [Rhodococcus sp. DMU1]	Rhodococcus/Rhodococcus aetherivorans/Rhodococcus sp. WB1/Rhodococcus aetherivorans/Rhodococcus aetherivorans/Rhodococcus sp. DMU1	4.9e-241	362	362	1	362	1	362	341	0.942	1	1	1	0		WP_050034255/WP_050034255/WP_050034255/WP_050034255	668	PDR/VanB family oxidoreductase [Rhodococcus rhodochrous]/KOS58086.1 ferredoxin [Rhodococcus rhodochrous KG-21]	Rhodococcus rhodochrous KG-21/Rhodococcus rhodochrous	4.8e-264	362	362	1	362	1	362	359	0.9917	1	1	1	0		WP_054370846;WP_054370846	726	Z051_00435	1441923	WP_054370846
ENBDON_00006	PDR/VanB family oxidoreductase	MTGLLPRHGRPSDLRGRNRPDRAMGVLGSVVDRYLSLVTTLDYAGAAGAADIDRQVDLLVAEKIPVTADGDVVRLTLRAPDGAELPAWHPGAHLDFHLPSGRRRQYSLCGDHEDRSRYTVAVRRIPGGGGGSLEMHALEPGDLVAVRGPRNGFPFVAEGTALFVAGGIGITPVLAMTRAAHRAGMDWRLVYTGRTRSAMPFLDEIGTWDSSRVFVRPDDEFGTPTGSDLLAGAPAGGAVYCCGPTPMLDAVRAGIDATPASALHFERFGAPPVVAGRAFEVQLASTGEVLAVPADESALEIIRRRLPGIGYSCRQGFCGTCRVRVLSGTPDHRENRLTPEERREEMLVCVSRADGGRLVLDL	362	20	4.8e-264	0.9563	/data/input/nr_20241120.dmnd	PDR/VanB family oxidoreductase [Rhodococcus aetherivorans]/KDE11421.1 ferredoxin [Rhodococcus aetherivorans]	Rhodococcus aetherivorans/Rhodococcus aetherivorans	2e-240	362	362	1	362	1	362	340	0.9392	1	1	1	0		WP_029546806	667	PDR/VanB family oxidoreductase [Rhodococcus rhodochrous]/KOS58086.1 ferredoxin [Rhodococcus rhodochrous KG-21]	Rhodococcus rhodochrous KG-21/Rhodococcus rhodochrous	4.8e-264	362	362	1	362	1	362	359	0.9917	1	1	1	0		WP_054370846;WP_054370846	726
ENBDON_00006	PDR/VanB family oxidoreductase	MTGLLPRHGRPSDLRGRNRPDRAMGVLGSVVDRYLSLVTTLDYAGAAGAADIDRQVDLLVAEKIPVTADGDVVRLTLRAPDGAELPAWHPGAHLDFHLPSGRRRQYSLCGDHEDRSRYTVAVRRIPGGGGGSLEMHALEPGDLVAVRGPRNGFPFVAEGTALFVAGGIGITPVLAMTRAAHRAGMDWRLVYTGRTRSAMPFLDEIGTWDSSRVFVRPDDEFGTPTGSDLLAGAPAGGAVYCCGPTPMLDAVRAGIDATPASALHFERFGAPPVVAGRAFEVQLASTGEVLAVPADESALEIIRRRLPGIGYSCRQGFCGTCRVRVLSGTPDHRENRLTPEERREEMLVCVSRADGGRLVLDL	362	20	4.8e-264	0.9563	/data/input/nr_20241120.dmnd	PDR/VanB family oxidoreductase [Rhodococcus aetherivorans]/ETT26604.1 Phthalate 4,5-dioxygenase [Rhodococcus rhodochrous ATCC 21198]/NGP25231.1 oxidoreductase [Rhodococcus aetherivorans]	Rhodococcus aetherivorans/Rhodococcus rhodochrous ATCC 21198/Rhodococcus aetherivorans	2.9e-240	362	362	1	362	1	362	341	0.942	1	1	1	0		WP_043799106/WP_043799106	666	PDR/VanB family oxidoreductase [Rhodococcus rhodochrous]/KOS58086.1 ferredoxin [Rhodococcus rhodochrous KG-21]	Rhodococcus rhodochrous KG-21/Rhodococcus rhodochrous	4.8e-264	362	362	1	362	1	362	359	0.9917	1	1	1	0		WP_054370846;WP_054370846	726
ENBDON_00006	PDR/VanB family oxidoreductase	MTGLLPRHGRPSDLRGRNRPDRAMGVLGSVVDRYLSLVTTLDYAGAAGAADIDRQVDLLVAEKIPVTADGDVVRLTLRAPDGAELPAWHPGAHLDFHLPSGRRRQYSLCGDHEDRSRYTVAVRRIPGGGGGSLEMHALEPGDLVAVRGPRNGFPFVAEGTALFVAGGIGITPVLAMTRAAHRAGMDWRLVYTGRTRSAMPFLDEIGTWDSSRVFVRPDDEFGTPTGSDLLAGAPAGGAVYCCGPTPMLDAVRAGIDATPASALHFERFGAPPVVAGRAFEVQLASTGEVLAVPADESALEIIRRRLPGIGYSCRQGFCGTCRVRVLSGTPDHRENRLTPEERREEMLVCVSRADGGRLVLDL	362	20	4.8e-264	0.9563	/data/input/nr_20241120.dmnd	PDR/VanB family oxidoreductase [Rhodococcus sp. M8]/OLL19883.1 oxidoreductase [Rhodococcus sp. M8]/QPG43725.1 oxidoreductase [Rhodococcus sp. M8]	Rhodococcus sp. M8/Rhodococcus sp. M8/Rhodococcus sp. M8	8.1e-240	362	362	1	362	1	362	339	0.9365	1	1	1	0		WP_072633808	665	PDR/VanB family oxidoreductase [Rhodococcus rhodochrous]/KOS58086.1 ferredoxin [Rhodococcus rhodochrous KG-21]	Rhodococcus rhodochrous KG-21/Rhodococcus rhodochrous	4.8e-264	362	362	1	362	1	362	359	0.9917	1	1	1	0		WP_054370846;WP_054370846	726
ENBDON_00006	PDR/VanB family oxidoreductase	MTGLLPRHGRPSDLRGRNRPDRAMGVLGSVVDRYLSLVTTLDYAGAAGAADIDRQVDLLVAEKIPVTADGDVVRLTLRAPDGAELPAWHPGAHLDFHLPSGRRRQYSLCGDHEDRSRYTVAVRRIPGGGGGSLEMHALEPGDLVAVRGPRNGFPFVAEGTALFVAGGIGITPVLAMTRAAHRAGMDWRLVYTGRTRSAMPFLDEIGTWDSSRVFVRPDDEFGTPTGSDLLAGAPAGGAVYCCGPTPMLDAVRAGIDATPASALHFERFGAPPVVAGRAFEVQLASTGEVLAVPADESALEIIRRRLPGIGYSCRQGFCGTCRVRVLSGTPDHRENRLTPEERREEMLVCVSRADGGRLVLDL	362	20	4.8e-264	0.9563	/data/input/nr_20241120.dmnd	PDR/VanB family oxidoreductase [Rhodococcus aetherivorans]/UGQ41315.1 PDR/VanB family oxidoreductase [Rhodococcus aetherivorans]	Rhodococcus aetherivorans/Rhodococcus aetherivorans	1.2e-239	362	362	1	362	1	362	341	0.942	1	1	1	0		WP_231772227	665	PDR/VanB family oxidoreductase [Rhodococcus rhodochrous]/KOS58086.1 ferredoxin [Rhodococcus rhodochrous KG-21]	Rhodococcus rhodochrous KG-21/Rhodococcus rhodochrous	4.8e-264	362	362	1	362	1	362	359	0.9917	1	1	1	0		WP_054370846;WP_054370846	726
ENBDON_00006	PDR/VanB family oxidoreductase	MTGLLPRHGRPSDLRGRNRPDRAMGVLGSVVDRYLSLVTTLDYAGAAGAADIDRQVDLLVAEKIPVTADGDVVRLTLRAPDGAELPAWHPGAHLDFHLPSGRRRQYSLCGDHEDRSRYTVAVRRIPGGGGGSLEMHALEPGDLVAVRGPRNGFPFVAEGTALFVAGGIGITPVLAMTRAAHRAGMDWRLVYTGRTRSAMPFLDEIGTWDSSRVFVRPDDEFGTPTGSDLLAGAPAGGAVYCCGPTPMLDAVRAGIDATPASALHFERFGAPPVVAGRAFEVQLASTGEVLAVPADESALEIIRRRLPGIGYSCRQGFCGTCRVRVLSGTPDHRENRLTPEERREEMLVCVSRADGGRLVLDL	362	20	4.8e-264	0.9563	/data/input/nr_20241120.dmnd	PDR/VanB family oxidoreductase [Rhodococcus aetherivorans]/WFS11836.1 PDR/VanB family oxidoreductase [Rhodococcus aetherivorans]	Rhodococcus aetherivorans/Rhodococcus aetherivorans	3.3e-239	362	362	1	362	1	362	339	0.9365	1	1	1	0		WP_278334133	664	PDR/VanB family oxidoreductase [Rhodococcus rhodochrous]/KOS58086.1 ferredoxin [Rhodococcus rhodochrous KG-21]	Rhodococcus rhodochrous KG-21/Rhodococcus rhodochrous	4.8e-264	362	362	1	362	1	362	359	0.9917	1	1	1	0		WP_054370846;WP_054370846	726
ENBDON_00006	PDR/VanB family oxidoreductase	MTGLLPRHGRPSDLRGRNRPDRAMGVLGSVVDRYLSLVTTLDYAGAAGAADIDRQVDLLVAEKIPVTADGDVVRLTLRAPDGAELPAWHPGAHLDFHLPSGRRRQYSLCGDHEDRSRYTVAVRRIPGGGGGSLEMHALEPGDLVAVRGPRNGFPFVAEGTALFVAGGIGITPVLAMTRAAHRAGMDWRLVYTGRTRSAMPFLDEIGTWDSSRVFVRPDDEFGTPTGSDLLAGAPAGGAVYCCGPTPMLDAVRAGIDATPASALHFERFGAPPVVAGRAFEVQLASTGEVLAVPADESALEIIRRRLPGIGYSCRQGFCGTCRVRVLSGTPDHRENRLTPEERREEMLVCVSRADGGRLVLDL	362	20	4.8e-264	0.9563	/data/input/nr_20241120.dmnd	MULTISPECIES: PDR/VanB family oxidoreductase [Rhodococcus]/NCL77105.1 Phthalate dioxygenase reductase [Rhodococcus sp. YH1]/PND49915.1 oxidoreductase [Rhodococcus sp. ENV425]/USC15406.1 PDR/VanB family oxidoreductase [Rhodococcus sp. 11-3]/UYF94424.1 PDR/VanB family oxidoreductase [Rhodococcus aetherivorans]/WKW98774.1 PDR/VanB family oxidoreductase [Rhodococcus aetherivorans]	Rhodococcus/Rhodococcus sp. YH1/Rhodococcus sp. ENV425/Rhodococcus sp. 11-3/Rhodococcus aetherivorans/Rhodococcus aetherivorans	1.3e-238	362	362	1	362	1	362	338	0.9337	1	1	1	0		WP_044475807/WP_044475807/WP_044475807/WP_044475807/WP_044475807	662	PDR/VanB family oxidoreductase [Rhodococcus rhodochrous]/KOS58086.1 ferredoxin [Rhodococcus rhodochrous KG-21]	Rhodococcus rhodochrous KG-21/Rhodococcus rhodochrous	4.8e-264	362	362	1	362	1	362	359	0.9917	1	1	1	0		WP_054370846;WP_054370846	726
ENBDON_00006	PDR/VanB family oxidoreductase	MTGLLPRHGRPSDLRGRNRPDRAMGVLGSVVDRYLSLVTTLDYAGAAGAADIDRQVDLLVAEKIPVTADGDVVRLTLRAPDGAELPAWHPGAHLDFHLPSGRRRQYSLCGDHEDRSRYTVAVRRIPGGGGGSLEMHALEPGDLVAVRGPRNGFPFVAEGTALFVAGGIGITPVLAMTRAAHRAGMDWRLVYTGRTRSAMPFLDEIGTWDSSRVFVRPDDEFGTPTGSDLLAGAPAGGAVYCCGPTPMLDAVRAGIDATPASALHFERFGAPPVVAGRAFEVQLASTGEVLAVPADESALEIIRRRLPGIGYSCRQGFCGTCRVRVLSGTPDHRENRLTPEERREEMLVCVSRADGGRLVLDL	362	20	4.8e-264	0.9563	/data/input/nr_20241120.dmnd	PDR/VanB family oxidoreductase [Rhodococcus sp. 14C212]/NGP05618.1 oxidoreductase [Rhodococcus sp. 14C212]	Rhodococcus sp. 14C212/Rhodococcus sp. 14C212	1.3e-238	362	362	1	362	1	362	339	0.9365	1	1	1	0		WP_165037344	662	PDR/VanB family oxidoreductase [Rhodococcus rhodochrous]/KOS58086.1 ferredoxin [Rhodococcus rhodochrous KG-21]	Rhodococcus rhodochrous KG-21/Rhodococcus rhodochrous	4.8e-264	362	362	1	362	1	362	359	0.9917	1	1	1	0		WP_054370846;WP_054370846	726
ENBDON_00006	PDR/VanB family oxidoreductase	MTGLLPRHGRPSDLRGRNRPDRAMGVLGSVVDRYLSLVTTLDYAGAAGAADIDRQVDLLVAEKIPVTADGDVVRLTLRAPDGAELPAWHPGAHLDFHLPSGRRRQYSLCGDHEDRSRYTVAVRRIPGGGGGSLEMHALEPGDLVAVRGPRNGFPFVAEGTALFVAGGIGITPVLAMTRAAHRAGMDWRLVYTGRTRSAMPFLDEIGTWDSSRVFVRPDDEFGTPTGSDLLAGAPAGGAVYCCGPTPMLDAVRAGIDATPASALHFERFGAPPVVAGRAFEVQLASTGEVLAVPADESALEIIRRRLPGIGYSCRQGFCGTCRVRVLSGTPDHRENRLTPEERREEMLVCVSRADGGRLVLDL	362	20	4.8e-264	0.9563	/data/input/nr_20241120.dmnd	vanillate O-demethylase oxidoreductase [Rhodococcus aetherivorans]	Rhodococcus aetherivorans	7e-238	359	359	1	359	4	362	338	0.9415	1	0.9917	1	0		GES40133	660	PDR/VanB family oxidoreductase [Rhodococcus rhodochrous]/KOS58086.1 ferredoxin [Rhodococcus rhodochrous KG-21]	Rhodococcus rhodochrous KG-21/Rhodococcus rhodochrous	4.8e-264	362	362	1	362	1	362	359	0.9917	1	1	1	0		WP_054370846;WP_054370846	726
ENBDON_00006	PDR/VanB family oxidoreductase	MTGLLPRHGRPSDLRGRNRPDRAMGVLGSVVDRYLSLVTTLDYAGAAGAADIDRQVDLLVAEKIPVTADGDVVRLTLRAPDGAELPAWHPGAHLDFHLPSGRRRQYSLCGDHEDRSRYTVAVRRIPGGGGGSLEMHALEPGDLVAVRGPRNGFPFVAEGTALFVAGGIGITPVLAMTRAAHRAGMDWRLVYTGRTRSAMPFLDEIGTWDSSRVFVRPDDEFGTPTGSDLLAGAPAGGAVYCCGPTPMLDAVRAGIDATPASALHFERFGAPPVVAGRAFEVQLASTGEVLAVPADESALEIIRRRLPGIGYSCRQGFCGTCRVRVLSGTPDHRENRLTPEERREEMLVCVSRADGGRLVLDL	362	20	4.8e-264	0.9563	/data/input/nr_20241120.dmnd	Vanillate O-demethylase oxidoreductase [Rhodococcus aetherivorans]	Rhodococcus aetherivorans	3.3e-236	359	359	1	359	4	362	335	0.9331	1	0.9917	1	0		CCW10980	656	PDR/VanB family oxidoreductase [Rhodococcus rhodochrous]/KOS58086.1 ferredoxin [Rhodococcus rhodochrous KG-21]	Rhodococcus rhodochrous KG-21/Rhodococcus rhodochrous	4.8e-264	362	362	1	362	1	362	359	0.9917	1	1	1	0		WP_054370846;WP_054370846	726
ENBDON_00007	MULTISPECIES: alpha/beta fold hydrolase	MTTRTVTNGPVRLHVVEEGNPAGPALLLVHGWPDTHALWDRVVPELARDFRIVRFDNRGAGASTVPRDVADYRLELLAGDLFAVIDAVSPDVPVHLLGHDWGAVLCWEAVCEPGAAERIASYTSVSGPNLDHLASWMRRRLRDRRPLGPLEQAVASAYTVLFQTPGLPVPALRWWFSRHWPAFVGFFDRSDPALIGPVAPTLADDMVHGLKLYRANLRRRLRAPRERHTDVPVQLIQGLRDRAVRPVGYEDTEKWVTDLRREPLDAGHWSPRSHAGELAAAAARFVRDVEARHTARTPAL	300	20	4.3e-222	0.9544	/data/input/nr_20241120.dmnd	MULTISPECIES: alpha/beta fold hydrolase [Rhodococcus]/KOS58087.1 hydrolase [Rhodococcus rhodochrous KG-21]/MDM7489164.1 alpha/beta fold hydrolase [Rhodococcus indonesiensis]	Rhodococcus/Rhodococcus rhodochrous KG-21/Rhodococcus indonesiensis	4.3e-222	300	300	1	300	1	300	298	0.9933	1	1	1	0		WP_054370847/WP_054370847/WP_054370847	615	MULTISPECIES: alpha/beta fold hydrolase [Rhodococcus]/KOS58087.1 hydrolase [Rhodococcus rhodochrous KG-21]/MDM7489164.1 alpha/beta fold hydrolase [Rhodococcus indonesiensis]	Rhodococcus rhodochrous KG-21/Rhodococcus/Rhodococcus indonesiensis	4.3e-222	300	300	1	300	1	300	298	0.9933	1	1	1	0		WP_054370847;WP_054370847;WP_054370847	615	Z051_00440	1441923	WP_054370847		GO:0003824-IEA	catalytic activity-IEA
ENBDON_00007	MULTISPECIES: alpha/beta fold hydrolase	MTTRTVTNGPVRLHVVEEGNPAGPALLLVHGWPDTHALWDRVVPELARDFRIVRFDNRGAGASTVPRDVADYRLELLAGDLFAVIDAVSPDVPVHLLGHDWGAVLCWEAVCEPGAAERIASYTSVSGPNLDHLASWMRRRLRDRRPLGPLEQAVASAYTVLFQTPGLPVPALRWWFSRHWPAFVGFFDRSDPALIGPVAPTLADDMVHGLKLYRANLRRRLRAPRERHTDVPVQLIQGLRDRAVRPVGYEDTEKWVTDLRREPLDAGHWSPRSHAGELAAAAARFVRDVEARHTARTPAL	300	20	4.3e-222	0.9544	/data/input/nr_20241120.dmnd	alpha/beta fold hydrolase [Rhodococcus ruber]/EME64449.1 hydrolase [Rhodococcus ruber BKS 20-38]	Rhodococcus ruber/Rhodococcus ruber BKS 20-38	1.7e-221	300	300	1	300	1	300	298	0.9933	1	1	1	0		WP_003936640/WP_003936640	613	MULTISPECIES: alpha/beta fold hydrolase [Rhodococcus]/KOS58087.1 hydrolase [Rhodococcus rhodochrous KG-21]/MDM7489164.1 alpha/beta fold hydrolase [Rhodococcus indonesiensis]	Rhodococcus rhodochrous KG-21/Rhodococcus/Rhodococcus indonesiensis	4.3e-222	300	300	1	300	1	300	298	0.9933	1	1	1	0		WP_054370847;WP_054370847;WP_054370847	615	OCS65_01200	191292	WP_006934470		GO:0016787-IEA	hydrolase activity-IEA
ENBDON_00007	MULTISPECIES: alpha/beta fold hydrolase	MTTRTVTNGPVRLHVVEEGNPAGPALLLVHGWPDTHALWDRVVPELARDFRIVRFDNRGAGASTVPRDVADYRLELLAGDLFAVIDAVSPDVPVHLLGHDWGAVLCWEAVCEPGAAERIASYTSVSGPNLDHLASWMRRRLRDRRPLGPLEQAVASAYTVLFQTPGLPVPALRWWFSRHWPAFVGFFDRSDPALIGPVAPTLADDMVHGLKLYRANLRRRLRAPRERHTDVPVQLIQGLRDRAVRPVGYEDTEKWVTDLRREPLDAGHWSPRSHAGELAAAAARFVRDVEARHTARTPAL	300	20	4.3e-222	0.9544	/data/input/nr_20241120.dmnd	alpha/beta fold hydrolase [Rhodococcus sp. (in: high G+C Gram-positive bacteria)]	Rhodococcus sp. (in: high G+C Gram-positive bacteria)	2.7e-216	300	300	1	300	1	300	292	0.9733	1	1	1	0		MDX5452947	600	MULTISPECIES: alpha/beta fold hydrolase [Rhodococcus]/KOS58087.1 hydrolase [Rhodococcus rhodochrous KG-21]/MDM7489164.1 alpha/beta fold hydrolase [Rhodococcus indonesiensis]	Rhodococcus rhodochrous KG-21/Rhodococcus/Rhodococcus indonesiensis	4.3e-222	300	300	1	300	1	300	298	0.9933	1	1	1	0		WP_054370847;WP_054370847;WP_054370847	615	HFP48_00035	2722825	WP_043799104
ENBDON_00007	MULTISPECIES: alpha/beta fold hydrolase	MTTRTVTNGPVRLHVVEEGNPAGPALLLVHGWPDTHALWDRVVPELARDFRIVRFDNRGAGASTVPRDVADYRLELLAGDLFAVIDAVSPDVPVHLLGHDWGAVLCWEAVCEPGAAERIASYTSVSGPNLDHLASWMRRRLRDRRPLGPLEQAVASAYTVLFQTPGLPVPALRWWFSRHWPAFVGFFDRSDPALIGPVAPTLADDMVHGLKLYRANLRRRLRAPRERHTDVPVQLIQGLRDRAVRPVGYEDTEKWVTDLRREPLDAGHWSPRSHAGELAAAAARFVRDVEARHTARTPAL	300	20	4.3e-222	0.9544	/data/input/nr_20241120.dmnd	alpha/beta fold hydrolase [Rhodococcus ruber]/QDC12625.1 alpha/beta fold hydrolase [Rhodococcus ruber]	Rhodococcus ruber/Rhodococcus ruber	3.7e-214	300	300	1	300	1	300	290	0.9667	1	1	1	0		WP_140188130	595	MULTISPECIES: alpha/beta fold hydrolase [Rhodococcus]/KOS58087.1 hydrolase [Rhodococcus rhodochrous KG-21]/MDM7489164.1 alpha/beta fold hydrolase [Rhodococcus indonesiensis]	Rhodococcus rhodochrous KG-21/Rhodococcus/Rhodococcus indonesiensis	4.3e-222	300	300	1	300	1	300	298	0.9933	1	1	1	0		WP_054370847;WP_054370847;WP_054370847	615	HFP48_00035	2722825	WP_043799104
ENBDON_00007	MULTISPECIES: alpha/beta fold hydrolase	MTTRTVTNGPVRLHVVEEGNPAGPALLLVHGWPDTHALWDRVVPELARDFRIVRFDNRGAGASTVPRDVADYRLELLAGDLFAVIDAVSPDVPVHLLGHDWGAVLCWEAVCEPGAAERIASYTSVSGPNLDHLASWMRRRLRDRRPLGPLEQAVASAYTVLFQTPGLPVPALRWWFSRHWPAFVGFFDRSDPALIGPVAPTLADDMVHGLKLYRANLRRRLRAPRERHTDVPVQLIQGLRDRAVRPVGYEDTEKWVTDLRREPLDAGHWSPRSHAGELAAAAARFVRDVEARHTARTPAL	300	20	4.3e-222	0.9544	/data/input/nr_20241120.dmnd	MULTISPECIES: alpha/beta fold hydrolase [Rhodococcus]/RIK10853.1 MAG: alpha/beta hydrolase [Acidobacteriota bacterium]/AWG97090.1 alpha/beta hydrolase [Rhodococcus ruber]/AXY49467.1 hydrolase [Rhodococcus ruber]/MCD2125295.1 alpha/beta fold hydrolase [Rhodococcus ruber]/MCF8784766.1 alpha/beta fold hydrolase [Rhodococcus ruber]	Rhodococcus/Acidobacteriota bacterium/Rhodococcus ruber/Rhodococcus ruber/Rhodococcus ruber/Rhodococcus ruber	5.2e-214	300	300	1	300	1	300	290	0.9667	1	1	1	0		WP_040273107/WP_040273107/WP_040273107	595	MULTISPECIES: alpha/beta fold hydrolase [Rhodococcus]/KOS58087.1 hydrolase [Rhodococcus rhodochrous KG-21]/MDM7489164.1 alpha/beta fold hydrolase [Rhodococcus indonesiensis]	Rhodococcus rhodochrous KG-21/Rhodococcus/Rhodococcus indonesiensis	4.3e-222	300	300	1	300	1	300	298	0.9933	1	1	1	0		WP_054370847;WP_054370847;WP_054370847	615	G352_12739	1278076	WP_003936640
ENBDON_00007	MULTISPECIES: alpha/beta fold hydrolase	MTTRTVTNGPVRLHVVEEGNPAGPALLLVHGWPDTHALWDRVVPELARDFRIVRFDNRGAGASTVPRDVADYRLELLAGDLFAVIDAVSPDVPVHLLGHDWGAVLCWEAVCEPGAAERIASYTSVSGPNLDHLASWMRRRLRDRRPLGPLEQAVASAYTVLFQTPGLPVPALRWWFSRHWPAFVGFFDRSDPALIGPVAPTLADDMVHGLKLYRANLRRRLRAPRERHTDVPVQLIQGLRDRAVRPVGYEDTEKWVTDLRREPLDAGHWSPRSHAGELAAAAARFVRDVEARHTARTPAL	300	20	4.3e-222	0.9544	/data/input/nr_20241120.dmnd	MULTISPECIES: alpha/beta fold hydrolase [Rhodococcus]/MDO2379398.1 alpha/beta fold hydrolase [Rhodococcus ruber]/ATQ30115.1 alpha/beta hydrolase [Rhodococcus ruber]/MBP2214171.1 pimeloyl-ACP methyl ester carboxylesterase [Rhodococcus ruber]/MCZ1073796.1 alpha/beta fold hydrolase [Rhodococcus sp. A5(2022)]/MDO1480815.1 alpha/beta fold hydrolase [Rhodococcus ruber]	Rhodococcus/Rhodococcus ruber/Rhodococcus ruber/Rhodococcus ruber/Rhodococcus sp. A5(2022)/Rhodococcus ruber	2.1e-213	300	300	1	300	1	300	289	0.9633	1	1	1	0		WP_010595446/WP_010595446/WP_010595446	593	MULTISPECIES: alpha/beta fold hydrolase [Rhodococcus]/KOS58087.1 hydrolase [Rhodococcus rhodochrous KG-21]/MDM7489164.1 alpha/beta fold hydrolase [Rhodococcus indonesiensis]	Rhodococcus rhodochrous KG-21/Rhodococcus/Rhodococcus indonesiensis	4.3e-222	300	300	1	300	1	300	298	0.9933	1	1	1	0		WP_054370847;WP_054370847;WP_054370847	615	Z051_00440	1441923	WP_054370847
ENBDON_00007	MULTISPECIES: alpha/beta fold hydrolase	MTTRTVTNGPVRLHVVEEGNPAGPALLLVHGWPDTHALWDRVVPELARDFRIVRFDNRGAGASTVPRDVADYRLELLAGDLFAVIDAVSPDVPVHLLGHDWGAVLCWEAVCEPGAAERIASYTSVSGPNLDHLASWMRRRLRDRRPLGPLEQAVASAYTVLFQTPGLPVPALRWWFSRHWPAFVGFFDRSDPALIGPVAPTLADDMVHGLKLYRANLRRRLRAPRERHTDVPVQLIQGLRDRAVRPVGYEDTEKWVTDLRREPLDAGHWSPRSHAGELAAAAARFVRDVEARHTARTPAL	300	20	4.3e-222	0.9544	/data/input/nr_20241120.dmnd	MULTISPECIES: alpha/beta fold hydrolase [Rhodococcus]/AUM19136.1 alpha/beta hydrolase [Rhodococcus ruber]/MBD8055141.1 alpha/beta fold hydrolase [Rhodococcus ruber]	Rhodococcus/Rhodococcus ruber/Rhodococcus ruber	6e-213	300	300	1	300	1	300	289	0.9633	1	1	1	0		WP_102031793/WP_102031793	592	MULTISPECIES: alpha/beta fold hydrolase [Rhodococcus]/KOS58087.1 hydrolase [Rhodococcus rhodochrous KG-21]/MDM7489164.1 alpha/beta fold hydrolase [Rhodococcus indonesiensis]	Rhodococcus rhodochrous KG-21/Rhodococcus/Rhodococcus indonesiensis	4.3e-222	300	300	1	300	1	300	298	0.9933	1	1	1	0		WP_054370847;WP_054370847;WP_054370847	615	G352_12739	1278076	WP_003936640
ENBDON_00007	MULTISPECIES: alpha/beta fold hydrolase	MTTRTVTNGPVRLHVVEEGNPAGPALLLVHGWPDTHALWDRVVPELARDFRIVRFDNRGAGASTVPRDVADYRLELLAGDLFAVIDAVSPDVPVHLLGHDWGAVLCWEAVCEPGAAERIASYTSVSGPNLDHLASWMRRRLRDRRPLGPLEQAVASAYTVLFQTPGLPVPALRWWFSRHWPAFVGFFDRSDPALIGPVAPTLADDMVHGLKLYRANLRRRLRAPRERHTDVPVQLIQGLRDRAVRPVGYEDTEKWVTDLRREPLDAGHWSPRSHAGELAAAAARFVRDVEARHTARTPAL	300	20	4.3e-222	0.9544	/data/input/nr_20241120.dmnd	alpha/beta fold hydrolase [Rhodococcus ruber]/KXF85736.1 hydrolase [Rhodococcus ruber Chol-4]	Rhodococcus ruber/Rhodococcus ruber Chol-4	1.7e-212	300	300	1	300	1	300	288	0.96	1	1	1	0		WP_017681014/WP_017681014	591	MULTISPECIES: alpha/beta fold hydrolase [Rhodococcus]/KOS58087.1 hydrolase [Rhodococcus rhodochrous KG-21]/MDM7489164.1 alpha/beta fold hydrolase [Rhodococcus indonesiensis]	Rhodococcus rhodochrous KG-21/Rhodococcus/Rhodococcus indonesiensis	4.3e-222	300	300	1	300	1	300	298	0.9933	1	1	1	0		WP_054370847;WP_054370847;WP_054370847	615	OCS65_01200	191292	WP_006934470
ENBDON_00007	MULTISPECIES: alpha/beta fold hydrolase	MTTRTVTNGPVRLHVVEEGNPAGPALLLVHGWPDTHALWDRVVPELARDFRIVRFDNRGAGASTVPRDVADYRLELLAGDLFAVIDAVSPDVPVHLLGHDWGAVLCWEAVCEPGAAERIASYTSVSGPNLDHLASWMRRRLRDRRPLGPLEQAVASAYTVLFQTPGLPVPALRWWFSRHWPAFVGFFDRSDPALIGPVAPTLADDMVHGLKLYRANLRRRLRAPRERHTDVPVQLIQGLRDRAVRPVGYEDTEKWVTDLRREPLDAGHWSPRSHAGELAAAAARFVRDVEARHTARTPAL	300	20	4.3e-222	0.9544	/data/input/nr_20241120.dmnd	alpha/beta fold hydrolase [Rhodococcus sp. M8]/OLL19884.1 alpha/beta hydrolase [Rhodococcus sp. M8]/QPG43726.1 alpha/beta fold hydrolase [Rhodococcus sp. M8]	Rhodococcus sp. M8/Rhodococcus sp. M8/Rhodococcus sp. M8	3.6e-205	300	297	1	297	1	297	283	0.9529	0.99	0.99	1	0		WP_072633809	572	MULTISPECIES: alpha/beta fold hydrolase [Rhodococcus]/KOS58087.1 hydrolase [Rhodococcus rhodochrous KG-21]/MDM7489164.1 alpha/beta fold hydrolase [Rhodococcus indonesiensis]	Rhodococcus rhodochrous KG-21/Rhodococcus/Rhodococcus indonesiensis	4.3e-222	300	300	1	300	1	300	298	0.9933	1	1	1	0		WP_054370847;WP_054370847;WP_054370847	615	RHRU231_590012	1830	WP_040273107
ENBDON_00007	MULTISPECIES: alpha/beta fold hydrolase	MTTRTVTNGPVRLHVVEEGNPAGPALLLVHGWPDTHALWDRVVPELARDFRIVRFDNRGAGASTVPRDVADYRLELLAGDLFAVIDAVSPDVPVHLLGHDWGAVLCWEAVCEPGAAERIASYTSVSGPNLDHLASWMRRRLRDRRPLGPLEQAVASAYTVLFQTPGLPVPALRWWFSRHWPAFVGFFDRSDPALIGPVAPTLADDMVHGLKLYRANLRRRLRAPRERHTDVPVQLIQGLRDRAVRPVGYEDTEKWVTDLRREPLDAGHWSPRSHAGELAAAAARFVRDVEARHTARTPAL	300	20	4.3e-222	0.9544	/data/input/nr_20241120.dmnd	MULTISPECIES: alpha/beta fold hydrolase [Rhodococcus]/QRI76809.1 alpha/beta fold hydrolase [Rhodococcus aetherivorans]/QSE60227.1 alpha/beta fold hydrolase [Rhodococcus sp. PSBB066]/QSE68468.1 alpha/beta fold hydrolase [Rhodococcus sp. PSBB049]/USC15407.1 alpha/beta fold hydrolase [Rhodococcus sp. 11-3]	Rhodococcus/Rhodococcus aetherivorans/Rhodococcus sp. PSBB066/Rhodococcus sp. PSBB049/Rhodococcus sp. 11-3	5.1e-205	300	297	1	297	1	297	282	0.9495	0.99	0.99	1	0		WP_203329725/WP_203329725/WP_203329725/WP_203329725/WP_203329725	572	MULTISPECIES: alpha/beta fold hydrolase [Rhodococcus]/KOS58087.1 hydrolase [Rhodococcus rhodochrous KG-21]/MDM7489164.1 alpha/beta fold hydrolase [Rhodococcus indonesiensis]	Rhodococcus rhodochrous KG-21/Rhodococcus/Rhodococcus indonesiensis	4.3e-222	300	300	1	300	1	300	298	0.9933	1	1	1	0		WP_054370847;WP_054370847;WP_054370847	615	RHRU231_590012	1830	WP_040273107
ENBDON_00007	MULTISPECIES: alpha/beta fold hydrolase	MTTRTVTNGPVRLHVVEEGNPAGPALLLVHGWPDTHALWDRVVPELARDFRIVRFDNRGAGASTVPRDVADYRLELLAGDLFAVIDAVSPDVPVHLLGHDWGAVLCWEAVCEPGAAERIASYTSVSGPNLDHLASWMRRRLRDRRPLGPLEQAVASAYTVLFQTPGLPVPALRWWFSRHWPAFVGFFDRSDPALIGPVAPTLADDMVHGLKLYRANLRRRLRAPRERHTDVPVQLIQGLRDRAVRPVGYEDTEKWVTDLRREPLDAGHWSPRSHAGELAAAAARFVRDVEARHTARTPAL	300	20	4.3e-222	0.9544	/data/input/nr_20241120.dmnd	MULTISPECIES: alpha/beta fold hydrolase [Rhodococcus]/ETT26603.1 hydrolase or acyltransferase (alpha/beta hydrolase superfamily)-like protein [Rhodococcus rhodochrous ATCC 21198]/AKE87885.1 hydrolase [Rhodococcus aetherivorans]/ANZ27477.1 hydrolase [Rhodococcus sp. WB1]/NGP25230.1 alpha/beta fold hydrolase [Rhodococcus aetherivorans]/QIX48126.1 alpha/beta fold hydrolase [Rhodococcus sp. DMU1]	Rhodococcus/Rhodococcus rhodochrous ATCC 21198/Rhodococcus aetherivorans/Rhodococcus sp. WB1/Rhodococcus aetherivorans/Rhodococcus sp. DMU1	7.3e-205	300	297	1	297	1	297	282	0.9495	0.99	0.99	1	0		WP_043799104/WP_043799104/WP_043799104/WP_043799104/WP_043799104	572	MULTISPECIES: alpha/beta fold hydrolase [Rhodococcus]/KOS58087.1 hydrolase [Rhodococcus rhodochrous KG-21]/MDM7489164.1 alpha/beta fold hydrolase [Rhodococcus indonesiensis]	Rhodococcus rhodochrous KG-21/Rhodococcus/Rhodococcus indonesiensis	4.3e-222	300	300	1	300	1	300	298	0.9933	1	1	1	0		WP_054370847;WP_054370847;WP_054370847	615
ENBDON_00007	MULTISPECIES: alpha/beta fold hydrolase	MTTRTVTNGPVRLHVVEEGNPAGPALLLVHGWPDTHALWDRVVPELARDFRIVRFDNRGAGASTVPRDVADYRLELLAGDLFAVIDAVSPDVPVHLLGHDWGAVLCWEAVCEPGAAERIASYTSVSGPNLDHLASWMRRRLRDRRPLGPLEQAVASAYTVLFQTPGLPVPALRWWFSRHWPAFVGFFDRSDPALIGPVAPTLADDMVHGLKLYRANLRRRLRAPRERHTDVPVQLIQGLRDRAVRPVGYEDTEKWVTDLRREPLDAGHWSPRSHAGELAAAAARFVRDVEARHTARTPAL	300	20	4.3e-222	0.9544	/data/input/nr_20241120.dmnd	alpha/beta fold hydrolase [Rhodococcus aetherivorans]/UGQ41314.1 alpha/beta fold hydrolase [Rhodococcus aetherivorans]	Rhodococcus aetherivorans/Rhodococcus aetherivorans	1e-204	300	297	1	297	1	297	282	0.9495	0.99	0.99	1	0		WP_231772226	571	MULTISPECIES: alpha/beta fold hydrolase [Rhodococcus]/KOS58087.1 hydrolase [Rhodococcus rhodochrous KG-21]/MDM7489164.1 alpha/beta fold hydrolase [Rhodococcus indonesiensis]	Rhodococcus rhodochrous KG-21/Rhodococcus/Rhodococcus indonesiensis	4.3e-222	300	300	1	300	1	300	298	0.9933	1	1	1	0		WP_054370847;WP_054370847;WP_054370847	615
ENBDON_00007	MULTISPECIES: alpha/beta fold hydrolase	MTTRTVTNGPVRLHVVEEGNPAGPALLLVHGWPDTHALWDRVVPELARDFRIVRFDNRGAGASTVPRDVADYRLELLAGDLFAVIDAVSPDVPVHLLGHDWGAVLCWEAVCEPGAAERIASYTSVSGPNLDHLASWMRRRLRDRRPLGPLEQAVASAYTVLFQTPGLPVPALRWWFSRHWPAFVGFFDRSDPALIGPVAPTLADDMVHGLKLYRANLRRRLRAPRERHTDVPVQLIQGLRDRAVRPVGYEDTEKWVTDLRREPLDAGHWSPRSHAGELAAAAARFVRDVEARHTARTPAL	300	20	4.3e-222	0.9544	/data/input/nr_20241120.dmnd	alpha/beta fold hydrolase [Rhodococcus sp. 14C212]/NGP05619.1 alpha/beta fold hydrolase [Rhodococcus sp. 14C212]	Rhodococcus sp. 14C212/Rhodococcus sp. 14C212	1.5e-204	300	297	1	297	1	297	280	0.9428	0.99	0.99	1	0		WP_165037345	571	MULTISPECIES: alpha/beta fold hydrolase [Rhodococcus]/KOS58087.1 hydrolase [Rhodococcus rhodochrous KG-21]/MDM7489164.1 alpha/beta fold hydrolase [Rhodococcus indonesiensis]	Rhodococcus rhodochrous KG-21/Rhodococcus/Rhodococcus indonesiensis	4.3e-222	300	300	1	300	1	300	298	0.9933	1	1	1	0		WP_054370847;WP_054370847;WP_054370847	615
ENBDON_00007	MULTISPECIES: alpha/beta fold hydrolase	MTTRTVTNGPVRLHVVEEGNPAGPALLLVHGWPDTHALWDRVVPELARDFRIVRFDNRGAGASTVPRDVADYRLELLAGDLFAVIDAVSPDVPVHLLGHDWGAVLCWEAVCEPGAAERIASYTSVSGPNLDHLASWMRRRLRDRRPLGPLEQAVASAYTVLFQTPGLPVPALRWWFSRHWPAFVGFFDRSDPALIGPVAPTLADDMVHGLKLYRANLRRRLRAPRERHTDVPVQLIQGLRDRAVRPVGYEDTEKWVTDLRREPLDAGHWSPRSHAGELAAAAARFVRDVEARHTARTPAL	300	20	4.3e-222	0.9544	/data/input/nr_20241120.dmnd	putative oxidoreductase EphD [Rhodococcus sp. YH1]	Rhodococcus sp. YH1	1.5e-204	300	297	1	297	1	297	282	0.9495	0.99	0.99	1	0		NCL77104	571	MULTISPECIES: alpha/beta fold hydrolase [Rhodococcus]/KOS58087.1 hydrolase [Rhodococcus rhodochrous KG-21]/MDM7489164.1 alpha/beta fold hydrolase [Rhodococcus indonesiensis]	Rhodococcus rhodochrous KG-21/Rhodococcus/Rhodococcus indonesiensis	4.3e-222	300	300	1	300	1	300	298	0.9933	1	1	1	0		WP_054370847;WP_054370847;WP_054370847	615
ENBDON_00007	MULTISPECIES: alpha/beta fold hydrolase	MTTRTVTNGPVRLHVVEEGNPAGPALLLVHGWPDTHALWDRVVPELARDFRIVRFDNRGAGASTVPRDVADYRLELLAGDLFAVIDAVSPDVPVHLLGHDWGAVLCWEAVCEPGAAERIASYTSVSGPNLDHLASWMRRRLRDRRPLGPLEQAVASAYTVLFQTPGLPVPALRWWFSRHWPAFVGFFDRSDPALIGPVAPTLADDMVHGLKLYRANLRRRLRAPRERHTDVPVQLIQGLRDRAVRPVGYEDTEKWVTDLRREPLDAGHWSPRSHAGELAAAAARFVRDVEARHTARTPAL	300	20	4.3e-222	0.9544	/data/input/nr_20241120.dmnd	alpha/beta fold hydrolase [Rhodococcus aetherivorans]/MBC2590272.1 alpha/beta fold hydrolase [Rhodococcus aetherivorans]	Rhodococcus aetherivorans/Rhodococcus aetherivorans	2.1e-204	300	297	1	297	1	297	282	0.9495	0.99	0.99	1	0		WP_185713364	570	MULTISPECIES: alpha/beta fold hydrolase [Rhodococcus]/KOS58087.1 hydrolase [Rhodococcus rhodochrous KG-21]/MDM7489164.1 alpha/beta fold hydrolase [Rhodococcus indonesiensis]	Rhodococcus rhodochrous KG-21/Rhodococcus/Rhodococcus indonesiensis	4.3e-222	300	300	1	300	1	300	298	0.9933	1	1	1	0		WP_054370847;WP_054370847;WP_054370847	615
ENBDON_00007	MULTISPECIES: alpha/beta fold hydrolase	MTTRTVTNGPVRLHVVEEGNPAGPALLLVHGWPDTHALWDRVVPELARDFRIVRFDNRGAGASTVPRDVADYRLELLAGDLFAVIDAVSPDVPVHLLGHDWGAVLCWEAVCEPGAAERIASYTSVSGPNLDHLASWMRRRLRDRRPLGPLEQAVASAYTVLFQTPGLPVPALRWWFSRHWPAFVGFFDRSDPALIGPVAPTLADDMVHGLKLYRANLRRRLRAPRERHTDVPVQLIQGLRDRAVRPVGYEDTEKWVTDLRREPLDAGHWSPRSHAGELAAAAARFVRDVEARHTARTPAL	300	20	4.3e-222	0.9544	/data/input/nr_20241120.dmnd	alpha/beta fold hydrolase [Rhodococcus aetherivorans]/KDE11422.1 hydrolase [Rhodococcus aetherivorans]/WFS11837.1 alpha/beta fold hydrolase [Rhodococcus aetherivorans]	Rhodococcus aetherivorans/Rhodococcus aetherivorans/Rhodococcus aetherivorans	4.2e-204	300	297	1	297	1	297	281	0.9461	0.99	0.99	1	0		WP_029546807	570	MULTISPECIES: alpha/beta fold hydrolase [Rhodococcus]/KOS58087.1 hydrolase [Rhodococcus rhodochrous KG-21]/MDM7489164.1 alpha/beta fold hydrolase [Rhodococcus indonesiensis]	Rhodococcus rhodochrous KG-21/Rhodococcus/Rhodococcus indonesiensis	4.3e-222	300	300	1	300	1	300	298	0.9933	1	1	1	0		WP_054370847;WP_054370847;WP_054370847	615
ENBDON_00007	MULTISPECIES: alpha/beta fold hydrolase	MTTRTVTNGPVRLHVVEEGNPAGPALLLVHGWPDTHALWDRVVPELARDFRIVRFDNRGAGASTVPRDVADYRLELLAGDLFAVIDAVSPDVPVHLLGHDWGAVLCWEAVCEPGAAERIASYTSVSGPNLDHLASWMRRRLRDRRPLGPLEQAVASAYTVLFQTPGLPVPALRWWFSRHWPAFVGFFDRSDPALIGPVAPTLADDMVHGLKLYRANLRRRLRAPRERHTDVPVQLIQGLRDRAVRPVGYEDTEKWVTDLRREPLDAGHWSPRSHAGELAAAAARFVRDVEARHTARTPAL	300	20	4.3e-222	0.9544	/data/input/nr_20241120.dmnd	MULTISPECIES: alpha/beta fold hydrolase [Rhodococcus]/PND49916.1 alpha/beta hydrolase [Rhodococcus sp. ENV425]/UYF94423.1 alpha/beta fold hydrolase [Rhodococcus aetherivorans]/WKW98775.1 alpha/beta fold hydrolase [Rhodococcus aetherivorans]/CCW10981.1 putative oxidoreductase [Rhodococcus aetherivorans]	Rhodococcus/Rhodococcus sp. ENV425/Rhodococcus aetherivorans/Rhodococcus aetherivorans/Rhodococcus aetherivorans	1.2e-203	300	297	1	297	1	297	281	0.9461	0.99	0.99	1	0		WP_006934470/WP_006934470/WP_006934470	568	MULTISPECIES: alpha/beta fold hydrolase [Rhodococcus]/KOS58087.1 hydrolase [Rhodococcus rhodochrous KG-21]/MDM7489164.1 alpha/beta fold hydrolase [Rhodococcus indonesiensis]	Rhodococcus rhodochrous KG-21/Rhodococcus/Rhodococcus indonesiensis	4.3e-222	300	300	1	300	1	300	298	0.9933	1	1	1	0		WP_054370847;WP_054370847;WP_054370847	615
ENBDON_00007	MULTISPECIES: alpha/beta fold hydrolase	MTTRTVTNGPVRLHVVEEGNPAGPALLLVHGWPDTHALWDRVVPELARDFRIVRFDNRGAGASTVPRDVADYRLELLAGDLFAVIDAVSPDVPVHLLGHDWGAVLCWEAVCEPGAAERIASYTSVSGPNLDHLASWMRRRLRDRRPLGPLEQAVASAYTVLFQTPGLPVPALRWWFSRHWPAFVGFFDRSDPALIGPVAPTLADDMVHGLKLYRANLRRRLRAPRERHTDVPVQLIQGLRDRAVRPVGYEDTEKWVTDLRREPLDAGHWSPRSHAGELAAAAARFVRDVEARHTARTPAL	300	20	4.3e-222	0.9544	/data/input/nr_20241120.dmnd	alpha/beta fold hydrolase [Rhodococcus aetherivorans]/MDV6293287.1 alpha/beta fold hydrolase [Rhodococcus aetherivorans]	Rhodococcus aetherivorans/Rhodococcus aetherivorans	1.7e-203	300	297	1	297	1	297	280	0.9428	0.99	0.99	1	0		WP_317550334	568	MULTISPECIES: alpha/beta fold hydrolase [Rhodococcus]/KOS58087.1 hydrolase [Rhodococcus rhodochrous KG-21]/MDM7489164.1 alpha/beta fold hydrolase [Rhodococcus indonesiensis]	Rhodococcus rhodochrous KG-21/Rhodococcus/Rhodococcus indonesiensis	4.3e-222	300	300	1	300	1	300	298	0.9933	1	1	1	0		WP_054370847;WP_054370847;WP_054370847	615
ENBDON_00007	MULTISPECIES: alpha/beta fold hydrolase	MTTRTVTNGPVRLHVVEEGNPAGPALLLVHGWPDTHALWDRVVPELARDFRIVRFDNRGAGASTVPRDVADYRLELLAGDLFAVIDAVSPDVPVHLLGHDWGAVLCWEAVCEPGAAERIASYTSVSGPNLDHLASWMRRRLRDRRPLGPLEQAVASAYTVLFQTPGLPVPALRWWFSRHWPAFVGFFDRSDPALIGPVAPTLADDMVHGLKLYRANLRRRLRAPRERHTDVPVQLIQGLRDRAVRPVGYEDTEKWVTDLRREPLDAGHWSPRSHAGELAAAAARFVRDVEARHTARTPAL	300	20	4.3e-222	0.9544	/data/input/nr_20241120.dmnd	hydrolase [Rhodococcus rhodochrous]	Rhodococcus rhodochrous	2.4e-203	300	297	1	297	1	297	280	0.9428	0.99	0.99	1	0		OOL30041	568	MULTISPECIES: alpha/beta fold hydrolase [Rhodococcus]/KOS58087.1 hydrolase [Rhodococcus rhodochrous KG-21]/MDM7489164.1 alpha/beta fold hydrolase [Rhodococcus indonesiensis]	Rhodococcus rhodochrous KG-21/Rhodococcus/Rhodococcus indonesiensis	4.3e-222	300	300	1	300	1	300	298	0.9933	1	1	1	0		WP_054370847;WP_054370847;WP_054370847	615
ENBDON_00007	MULTISPECIES: alpha/beta fold hydrolase	MTTRTVTNGPVRLHVVEEGNPAGPALLLVHGWPDTHALWDRVVPELARDFRIVRFDNRGAGASTVPRDVADYRLELLAGDLFAVIDAVSPDVPVHLLGHDWGAVLCWEAVCEPGAAERIASYTSVSGPNLDHLASWMRRRLRDRRPLGPLEQAVASAYTVLFQTPGLPVPALRWWFSRHWPAFVGFFDRSDPALIGPVAPTLADDMVHGLKLYRANLRRRLRAPRERHTDVPVQLIQGLRDRAVRPVGYEDTEKWVTDLRREPLDAGHWSPRSHAGELAAAAARFVRDVEARHTARTPAL	300	20	4.3e-222	0.9544	/data/input/nr_20241120.dmnd	alpha/beta fold hydrolase [Rhodococcus sp. F64268]/MCK0091760.1 alpha/beta fold hydrolase [Rhodococcus sp. F64268]	Rhodococcus sp. F64268/Rhodococcus sp. F64268	1.3e-182	301	291	1	291	1	291	258	0.8866	0.9668	0.97	1	0		WP_247273915	515	MULTISPECIES: alpha/beta fold hydrolase [Rhodococcus]/KOS58087.1 hydrolase [Rhodococcus rhodochrous KG-21]/MDM7489164.1 alpha/beta fold hydrolase [Rhodococcus indonesiensis]	Rhodococcus rhodochrous KG-21/Rhodococcus/Rhodococcus indonesiensis	4.3e-222	300	300	1	300	1	300	298	0.9933	1	1	1	0		WP_054370847;WP_054370847;WP_054370847	615
ENBDON_00008	DNA topoisomerase (ATP-hydrolyzing) subunit B	MAAQKSNKSNSDYGASSITVLEGLEAVRKRPGMYIGSTGERGLHHLIWEVVDNSVDEAMAGHATKVEVTLLEDGGVQVVDDGRGIPVGMHASGVPTVEVVLTQLHAGGKFDSDAYAVSGGLHGVGISVVNALSTQLQVEIDRDGYHWEQTYQSSKPGKLVKGEPTRATGTTVRFWADPDIFETTTYNFETVARRLQEMAFLNKGLTITLTDERVAPEEVTDEVVSELAEAPKKAEEQEQAEIEQQHKVKVRVYHYPGGLEDYVRHINRTKQPIHNSVVGFTAKGTGHELEVAMQWNSGYSESVHTFANTINTHEGGTHEEGFRAALTSVVNKYAKDKKLLKDKDPNLTGDDIREGLAAIISVKVGEPQFEGQTKTKLGNTEVKSFVQKACNEHLSHWLE…	677	20	0	0.9677	/data/input/nr_20241120.dmnd	DNA topoisomerase (ATP-hydrolyzing) subunit B [Rhodococcus rhodochrous]/KOS58088.1 DNA gyrase subunit B [Rhodococcus rhodochrous KG-21]	Rhodococcus rhodochrous/Rhodococcus rhodochrous KG-21	0	677	677	1	677	1	677	677	1	1	1	1	0		WP_054370848/WP_054370848	1300	KOS58088.1 DNA gyrase subunit B [Rhodococcus rhodochrous KG-21]/DNA topoisomerase (ATP-hydrolyzing) subunit B [Rhodococcus rhodochrous]	Rhodococcus rhodochrous KG-21/Rhodococcus rhodochrous	0	677	677	1	677	1	677	677	1	1	1	1	0		WP_054370848;WP_054370848	1300	gyrB	423618	AHZ45480		GO:0003677-IEA	DNA binding-IEA
ENBDON_00008	DNA topoisomerase (ATP-hydrolyzing) subunit B	MAAQKSNKSNSDYGASSITVLEGLEAVRKRPGMYIGSTGERGLHHLIWEVVDNSVDEAMAGHATKVEVTLLEDGGVQVVDDGRGIPVGMHASGVPTVEVVLTQLHAGGKFDSDAYAVSGGLHGVGISVVNALSTQLQVEIDRDGYHWEQTYQSSKPGKLVKGEPTRATGTTVRFWADPDIFETTTYNFETVARRLQEMAFLNKGLTITLTDERVAPEEVTDEVVSELAEAPKKAEEQEQAEIEQQHKVKVRVYHYPGGLEDYVRHINRTKQPIHNSVVGFTAKGTGHELEVAMQWNSGYSESVHTFANTINTHEGGTHEEGFRAALTSVVNKYAKDKKLLKDKDPNLTGDDIREGLAAIISVKVGEPQFEGQTKTKLGNTEVKSFVQKACNEHLSHWLE…	677	20	0	0.9677	/data/input/nr_20241120.dmnd	DNA topoisomerase (ATP-hydrolyzing) subunit B [Rhodococcus indonesiensis]/MDM7489165.1 DNA topoisomerase (ATP-hydrolyzing) subunit B [Rhodococcus indonesiensis]	Rhodococcus indonesiensis/Rhodococcus indonesiensis	0	677	677	1	677	1	677	677	1	1	1	1	0		WP_289379248	1298	KOS58088.1 DNA gyrase subunit B [Rhodococcus rhodochrous KG-21]/DNA topoisomerase (ATP-hydrolyzing) subunit B [Rhodococcus rhodochrous]	Rhodococcus rhodochrous KG-21/Rhodococcus rhodochrous	0	677	677	1	677	1	677	677	1	1	1	1	0		WP_054370848;WP_054370848	1300	gyrB	1830	WP_010595447		GO:0005737-IEA	cytoplasm-IEA
ENBDON_00008	DNA topoisomerase (ATP-hydrolyzing) subunit B	MAAQKSNKSNSDYGASSITVLEGLEAVRKRPGMYIGSTGERGLHHLIWEVVDNSVDEAMAGHATKVEVTLLEDGGVQVVDDGRGIPVGMHASGVPTVEVVLTQLHAGGKFDSDAYAVSGGLHGVGISVVNALSTQLQVEIDRDGYHWEQTYQSSKPGKLVKGEPTRATGTTVRFWADPDIFETTTYNFETVARRLQEMAFLNKGLTITLTDERVAPEEVTDEVVSELAEAPKKAEEQEQAEIEQQHKVKVRVYHYPGGLEDYVRHINRTKQPIHNSVVGFTAKGTGHELEVAMQWNSGYSESVHTFANTINTHEGGTHEEGFRAALTSVVNKYAKDKKLLKDKDPNLTGDDIREGLAAIISVKVGEPQFEGQTKTKLGNTEVKSFVQKACNEHLSHWLE…	677	20	0	0.9677	/data/input/nr_20241120.dmnd	DNA topoisomerase (ATP-hydrolyzing) subunit B [Rhodococcus ruber]	Rhodococcus ruber	0	677	677	1	677	1	677	668	0.9867	1	1	1	0		MDV3205557	1295	KOS58088.1 DNA gyrase subunit B [Rhodococcus rhodochrous KG-21]/DNA topoisomerase (ATP-hydrolyzing) subunit B [Rhodococcus rhodochrous]	Rhodococcus rhodochrous KG-21/Rhodococcus rhodochrous	0	677	677	1	677	1	677	677	1	1	1	1	0		WP_054370848;WP_054370848	1300	gyrB	423618	AHZ45480		GO:0046872-IEA	metal ion binding-IEA
ENBDON_00008	DNA topoisomerase (ATP-hydrolyzing) subunit B	MAAQKSNKSNSDYGASSITVLEGLEAVRKRPGMYIGSTGERGLHHLIWEVVDNSVDEAMAGHATKVEVTLLEDGGVQVVDDGRGIPVGMHASGVPTVEVVLTQLHAGGKFDSDAYAVSGGLHGVGISVVNALSTQLQVEIDRDGYHWEQTYQSSKPGKLVKGEPTRATGTTVRFWADPDIFETTTYNFETVARRLQEMAFLNKGLTITLTDERVAPEEVTDEVVSELAEAPKKAEEQEQAEIEQQHKVKVRVYHYPGGLEDYVRHINRTKQPIHNSVVGFTAKGTGHELEVAMQWNSGYSESVHTFANTINTHEGGTHEEGFRAALTSVVNKYAKDKKLLKDKDPNLTGDDIREGLAAIISVKVGEPQFEGQTKTKLGNTEVKSFVQKACNEHLSHWLE…	677	20	0	0.9677	/data/input/nr_20241120.dmnd	MULTISPECIES: DNA topoisomerase (ATP-hydrolyzing) subunit B [Rhodococcus]/MDO2379399.1 DNA topoisomerase (ATP-hydrolyzing) subunit B [Rhodococcus ruber]/RIK10852.1 MAG: DNA topoisomerase (ATP-hydrolyzing) subunit B [Acidobacteriota bacterium]/ATQ30116.1 DNA topoisomerase (ATP-hydrolyzing) subunit B [Rhodococcus ruber]/AUM19137.1 DNA topoisomerase (ATP-hydrolyzing) subunit B [Rhodococcus ruber]/AW…	Rhodococcus/Rhodococcus ruber/Acidobacteriota bacterium/Rhodococcus ruber/Rhodococcus ruber/Rhodococcus ruber	0	677	677	1	677	1	677	668	0.9867	1	1	1	0		WP_010595447/WP_010595447/WP_010595447	1295	KOS58088.1 DNA gyrase subunit B [Rhodococcus rhodochrous KG-21]/DNA topoisomerase (ATP-hydrolyzing) subunit B [Rhodococcus rhodochrous]	Rhodococcus rhodochrous KG-21/Rhodococcus rhodochrous	0	677	677	1	677	1	677	677	1	1	1	1	0		WP_054370848;WP_054370848	1300	gyrB	1441923	WP_054370848		GO:0006261-IEA	DNA-templated DNA replication-IEA
ENBDON_00008	DNA topoisomerase (ATP-hydrolyzing) subunit B	MAAQKSNKSNSDYGASSITVLEGLEAVRKRPGMYIGSTGERGLHHLIWEVVDNSVDEAMAGHATKVEVTLLEDGGVQVVDDGRGIPVGMHASGVPTVEVVLTQLHAGGKFDSDAYAVSGGLHGVGISVVNALSTQLQVEIDRDGYHWEQTYQSSKPGKLVKGEPTRATGTTVRFWADPDIFETTTYNFETVARRLQEMAFLNKGLTITLTDERVAPEEVTDEVVSELAEAPKKAEEQEQAEIEQQHKVKVRVYHYPGGLEDYVRHINRTKQPIHNSVVGFTAKGTGHELEVAMQWNSGYSESVHTFANTINTHEGGTHEEGFRAALTSVVNKYAKDKKLLKDKDPNLTGDDIREGLAAIISVKVGEPQFEGQTKTKLGNTEVKSFVQKACNEHLSHWLE…	677	20	0	0.9677	/data/input/nr_20241120.dmnd	DNA gyrase subunit B, partial [Rhodococcus sp. YYL]	Rhodococcus sp. YYL	0	677	677	1	677	1	677	668	0.9867	1	1	1	0		AHZ45480	1293	KOS58088.1 DNA gyrase subunit B [Rhodococcus rhodochrous KG-21]/DNA topoisomerase (ATP-hydrolyzing) subunit B [Rhodococcus rhodochrous]	Rhodococcus rhodochrous KG-21/Rhodococcus rhodochrous	0	677	677	1	677	1	677	677	1	1	1	1	0		WP_054370848;WP_054370848	1300	gyrB	423618	AHZ45480		GO:0005694-IEA	chromosome-IEA
ENBDON_00008	DNA topoisomerase (ATP-hydrolyzing) subunit B	MAAQKSNKSNSDYGASSITVLEGLEAVRKRPGMYIGSTGERGLHHLIWEVVDNSVDEAMAGHATKVEVTLLEDGGVQVVDDGRGIPVGMHASGVPTVEVVLTQLHAGGKFDSDAYAVSGGLHGVGISVVNALSTQLQVEIDRDGYHWEQTYQSSKPGKLVKGEPTRATGTTVRFWADPDIFETTTYNFETVARRLQEMAFLNKGLTITLTDERVAPEEVTDEVVSELAEAPKKAEEQEQAEIEQQHKVKVRVYHYPGGLEDYVRHINRTKQPIHNSVVGFTAKGTGHELEVAMQWNSGYSESVHTFANTINTHEGGTHEEGFRAALTSVVNKYAKDKKLLKDKDPNLTGDDIREGLAAIISVKVGEPQFEGQTKTKLGNTEVKSFVQKACNEHLSHWLE…	677	20	0	0.9677	/data/input/nr_20241120.dmnd	DNA topoisomerase (ATP-hydrolyzing) subunit B [Rhodococcus ruber]/EME64448.1 DNA gyrase subunit B [Rhodococcus ruber BKS 20-38]	Rhodococcus ruber/Rhodococcus ruber BKS 20-38	0	677	677	1	677	1	677	675	0.997	1	1	1	0		WP_003936639/WP_003936639	1293	KOS58088.1 DNA gyrase subunit B [Rhodococcus rhodochrous KG-21]/DNA topoisomerase (ATP-hydrolyzing) subunit B [Rhodococcus rhodochrous]	Rhodococcus rhodochrous KG-21/Rhodococcus rhodochrous	0	677	677	1	677	1	677	677	1	1	1	1	0		WP_054370848;WP_054370848	1300	gyrB	191292	WP_006934474		GO:0003916-IEA	DNA topoisomerase activity-IEA
ENBDON_00008	DNA topoisomerase (ATP-hydrolyzing) subunit B	MAAQKSNKSNSDYGASSITVLEGLEAVRKRPGMYIGSTGERGLHHLIWEVVDNSVDEAMAGHATKVEVTLLEDGGVQVVDDGRGIPVGMHASGVPTVEVVLTQLHAGGKFDSDAYAVSGGLHGVGISVVNALSTQLQVEIDRDGYHWEQTYQSSKPGKLVKGEPTRATGTTVRFWADPDIFETTTYNFETVARRLQEMAFLNKGLTITLTDERVAPEEVTDEVVSELAEAPKKAEEQEQAEIEQQHKVKVRVYHYPGGLEDYVRHINRTKQPIHNSVVGFTAKGTGHELEVAMQWNSGYSESVHTFANTINTHEGGTHEEGFRAALTSVVNKYAKDKKLLKDKDPNLTGDDIREGLAAIISVKVGEPQFEGQTKTKLGNTEVKSFVQKACNEHLSHWLE…	677	20	0	0.9677	/data/input/nr_20241120.dmnd	MULTISPECIES: DNA topoisomerase (ATP-hydrolyzing) subunit B [Rhodococcus]/ETT26602.1 DNA gyrase B subunit [Rhodococcus rhodochrous ATCC 21198]/AKE87886.1 DNA gyrase subunit B [Rhodococcus aetherivorans]/ANZ27476.1 DNA gyrase subunit B [Rhodococcus sp. WB1]/KDE11423.1 DNA gyrase subunit B [Rhodococcus aetherivorans]/NGP25229.1 DNA topoisomerase (ATP-hydrolyzing) subunit B [Rhodococcus aetherivoran…	Rhodococcus/Rhodococcus rhodochrous ATCC 21198/Rhodococcus aetherivorans/Rhodococcus sp. WB1/Rhodococcus aetherivorans/Rhodococcus aetherivorans	0	677	677	1	677	1	677	664	0.9808	1	1	1	0		WP_006934474/WP_006934474/WP_006934474/WP_006934474	1278	KOS58088.1 DNA gyrase subunit B [Rhodococcus rhodochrous KG-21]/DNA topoisomerase (ATP-hydrolyzing) subunit B [Rhodococcus rhodochrous]	Rhodococcus rhodochrous KG-21/Rhodococcus rhodochrous	0	677	677	1	677	1	677	677	1	1	1	1	0		WP_054370848;WP_054370848	1300	gyrB	423618	AHZ45480		GO:0034335-IEA	DNA negative supercoiling activity-IEA
ENBDON_00008	DNA topoisomerase (ATP-hydrolyzing) subunit B	MAAQKSNKSNSDYGASSITVLEGLEAVRKRPGMYIGSTGERGLHHLIWEVVDNSVDEAMAGHATKVEVTLLEDGGVQVVDDGRGIPVGMHASGVPTVEVVLTQLHAGGKFDSDAYAVSGGLHGVGISVVNALSTQLQVEIDRDGYHWEQTYQSSKPGKLVKGEPTRATGTTVRFWADPDIFETTTYNFETVARRLQEMAFLNKGLTITLTDERVAPEEVTDEVVSELAEAPKKAEEQEQAEIEQQHKVKVRVYHYPGGLEDYVRHINRTKQPIHNSVVGFTAKGTGHELEVAMQWNSGYSESVHTFANTINTHEGGTHEEGFRAALTSVVNKYAKDKKLLKDKDPNLTGDDIREGLAAIISVKVGEPQFEGQTKTKLGNTEVKSFVQKACNEHLSHWLE…	677	20	0	0.9677	/data/input/nr_20241120.dmnd	MULTISPECIES: DNA topoisomerase (ATP-hydrolyzing) subunit B [Rhodococcus]/NCL77103.1 DNA gyrase subunit B [Rhodococcus sp. YH1]/MBC2590273.1 DNA topoisomerase (ATP-hydrolyzing) subunit B [Rhodococcus aetherivorans]/MDV6293288.1 DNA topoisomerase (ATP-hydrolyzing) subunit B [Rhodococcus aetherivorans]/OLL19885.1 DNA gyrase subunit B [Rhodococcus sp. M8]/QPG43727.1 DNA topoisomerase (ATP-hydrolyzin…	Rhodococcus/Rhodococcus sp. YH1/Rhodococcus aetherivorans/Rhodococcus aetherivorans/Rhodococcus sp. M8/Rhodococcus sp. M8	0	677	677	1	677	1	677	664	0.9808	1	1	1	0		WP_072633810/WP_072633810/WP_072633810/WP_072633810	1277	KOS58088.1 DNA gyrase subunit B [Rhodococcus rhodochrous KG-21]/DNA topoisomerase (ATP-hydrolyzing) subunit B [Rhodococcus rhodochrous]	Rhodococcus rhodochrous KG-21/Rhodococcus rhodochrous	0	677	677	1	677	1	677	677	1	1	1	1	0		WP_054370848;WP_054370848	1300	gyrB	1278076	WP_003936639		GO:0003918-IEA	DNA topoisomerase type II (double strand cut, ATP-hydrolyzing) activity-IEA
ENBDON_00008	DNA topoisomerase (ATP-hydrolyzing) subunit B	MAAQKSNKSNSDYGASSITVLEGLEAVRKRPGMYIGSTGERGLHHLIWEVVDNSVDEAMAGHATKVEVTLLEDGGVQVVDDGRGIPVGMHASGVPTVEVVLTQLHAGGKFDSDAYAVSGGLHGVGISVVNALSTQLQVEIDRDGYHWEQTYQSSKPGKLVKGEPTRATGTTVRFWADPDIFETTTYNFETVARRLQEMAFLNKGLTITLTDERVAPEEVTDEVVSELAEAPKKAEEQEQAEIEQQHKVKVRVYHYPGGLEDYVRHINRTKQPIHNSVVGFTAKGTGHELEVAMQWNSGYSESVHTFANTINTHEGGTHEEGFRAALTSVVNKYAKDKKLLKDKDPNLTGDDIREGLAAIISVKVGEPQFEGQTKTKLGNTEVKSFVQKACNEHLSHWLE…	677	20	0	0.9677	/data/input/nr_20241120.dmnd	DNA topoisomerase (ATP-hydrolyzing) subunit B [Rhodococcus sp. 14C212]	Rhodococcus sp. 14C212	0	677	677	1	677	1	677	663	0.9793	1	1	1	0		NGP05620	1275	KOS58088.1 DNA gyrase subunit B [Rhodococcus rhodochrous KG-21]/DNA topoisomerase (ATP-hydrolyzing) subunit B [Rhodococcus rhodochrous]	Rhodococcus rhodochrous KG-21/Rhodococcus rhodochrous	0	677	677	1	677	1	677	677	1	1	1	1	0		WP_054370848;WP_054370848	1300	gyrB	191292	WP_006934474		GO:0006265-IEA	DNA topological change-IEA
ENBDON_00008	DNA topoisomerase (ATP-hydrolyzing) subunit B	MAAQKSNKSNSDYGASSITVLEGLEAVRKRPGMYIGSTGERGLHHLIWEVVDNSVDEAMAGHATKVEVTLLEDGGVQVVDDGRGIPVGMHASGVPTVEVVLTQLHAGGKFDSDAYAVSGGLHGVGISVVNALSTQLQVEIDRDGYHWEQTYQSSKPGKLVKGEPTRATGTTVRFWADPDIFETTTYNFETVARRLQEMAFLNKGLTITLTDERVAPEEVTDEVVSELAEAPKKAEEQEQAEIEQQHKVKVRVYHYPGGLEDYVRHINRTKQPIHNSVVGFTAKGTGHELEVAMQWNSGYSESVHTFANTINTHEGGTHEEGFRAALTSVVNKYAKDKKLLKDKDPNLTGDDIREGLAAIISVKVGEPQFEGQTKTKLGNTEVKSFVQKACNEHLSHWLE…	677	20	0	0.9677	/data/input/nr_20241120.dmnd	DNA topoisomerase (ATP-hydrolyzing) subunit B [Rhodococcus zopfii]	Rhodococcus zopfii	0	678	678	1	678	1	677	649	0.9572	1	1.0015	1	0		WP_138999036	1224	KOS58088.1 DNA gyrase subunit B [Rhodococcus rhodochrous KG-21]/DNA topoisomerase (ATP-hydrolyzing) subunit B [Rhodococcus rhodochrous]	Rhodococcus rhodochrous KG-21/Rhodococcus rhodochrous	0	677	677	1	677	1	677	677	1	1	1	1	0		WP_054370848;WP_054370848	1300	gyrB	1278076	WP_003936639		GO:0005524-IEA	ATP binding-IEA
ENBDON_00008	DNA topoisomerase (ATP-hydrolyzing) subunit B	MAAQKSNKSNSDYGASSITVLEGLEAVRKRPGMYIGSTGERGLHHLIWEVVDNSVDEAMAGHATKVEVTLLEDGGVQVVDDGRGIPVGMHASGVPTVEVVLTQLHAGGKFDSDAYAVSGGLHGVGISVVNALSTQLQVEIDRDGYHWEQTYQSSKPGKLVKGEPTRATGTTVRFWADPDIFETTTYNFETVARRLQEMAFLNKGLTITLTDERVAPEEVTDEVVSELAEAPKKAEEQEQAEIEQQHKVKVRVYHYPGGLEDYVRHINRTKQPIHNSVVGFTAKGTGHELEVAMQWNSGYSESVHTFANTINTHEGGTHEEGFRAALTSVVNKYAKDKKLLKDKDPNLTGDDIREGLAAIISVKVGEPQFEGQTKTKLGNTEVKSFVQKACNEHLSHWLE…	677	20	0	0.9677	/data/input/nr_20241120.dmnd	DNA topoisomerase (ATP-hydrolyzing) subunit B [Rhodococcus phenolicus]	Rhodococcus phenolicus	0	678	678	1	678	1	677	651	0.9602	1	1.0015	1	0		WP_068159285	1223	KOS58088.1 DNA gyrase subunit B [Rhodococcus rhodochrous KG-21]/DNA topoisomerase (ATP-hydrolyzing) subunit B [Rhodococcus rhodochrous]	Rhodococcus rhodochrous KG-21/Rhodococcus rhodochrous	0	677	677	1	677	1	677	677	1	1	1	1	0		WP_054370848;WP_054370848	1300	gyrB	1278076	WP_003936639
ENBDON_00008	DNA topoisomerase (ATP-hydrolyzing) subunit B	MAAQKSNKSNSDYGASSITVLEGLEAVRKRPGMYIGSTGERGLHHLIWEVVDNSVDEAMAGHATKVEVTLLEDGGVQVVDDGRGIPVGMHASGVPTVEVVLTQLHAGGKFDSDAYAVSGGLHGVGISVVNALSTQLQVEIDRDGYHWEQTYQSSKPGKLVKGEPTRATGTTVRFWADPDIFETTTYNFETVARRLQEMAFLNKGLTITLTDERVAPEEVTDEVVSELAEAPKKAEEQEQAEIEQQHKVKVRVYHYPGGLEDYVRHINRTKQPIHNSVVGFTAKGTGHELEVAMQWNSGYSESVHTFANTINTHEGGTHEEGFRAALTSVVNKYAKDKKLLKDKDPNLTGDDIREGLAAIISVKVGEPQFEGQTKTKLGNTEVKSFVQKACNEHLSHWLE…	677	20	0	0.9677	/data/input/nr_20241120.dmnd	DNA topoisomerase (ATP-hydrolyzing) subunit B [Rhodococcus zopfii]	Rhodococcus zopfii	0	678	678	1	678	1	677	649	0.9572	1	1.0015	1	0		WP_072809135	1223	KOS58088.1 DNA gyrase subunit B [Rhodococcus rhodochrous KG-21]/DNA topoisomerase (ATP-hydrolyzing) subunit B [Rhodococcus rhodochrous]	Rhodococcus rhodochrous KG-21/Rhodococcus rhodochrous	0	677	677	1	677	1	677	677	1	1	1	1	0		WP_054370848;WP_054370848	1300	gyrB	191292	WP_006934474
ENBDON_00008	DNA topoisomerase (ATP-hydrolyzing) subunit B	MAAQKSNKSNSDYGASSITVLEGLEAVRKRPGMYIGSTGERGLHHLIWEVVDNSVDEAMAGHATKVEVTLLEDGGVQVVDDGRGIPVGMHASGVPTVEVVLTQLHAGGKFDSDAYAVSGGLHGVGISVVNALSTQLQVEIDRDGYHWEQTYQSSKPGKLVKGEPTRATGTTVRFWADPDIFETTTYNFETVARRLQEMAFLNKGLTITLTDERVAPEEVTDEVVSELAEAPKKAEEQEQAEIEQQHKVKVRVYHYPGGLEDYVRHINRTKQPIHNSVVGFTAKGTGHELEVAMQWNSGYSESVHTFANTINTHEGGTHEEGFRAALTSVVNKYAKDKKLLKDKDPNLTGDDIREGLAAIISVKVGEPQFEGQTKTKLGNTEVKSFVQKACNEHLSHWLE…	677	20	0	0.9677	/data/input/nr_20241120.dmnd	MULTISPECIES: DNA topoisomerase (ATP-hydrolyzing) subunit B [unclassified Rhodococcus (in: high G+C Gram-positive bacteria)]/MBH0123305.1 DNA topoisomerase (ATP-hydrolyzing) subunit B [Rhodococcus sp. CX]/MCK8672161.1 DNA topoisomerase (ATP-hydrolyzing) subunit B [Rhodococcus sp. HM1]	unclassified Rhodococcus (in: high G+C Gram-positive bacteria)/Rhodococcus sp. CX/Rhodococcus sp. HM1	0	678	678	1	678	1	677	649	0.9572	1	1.0015	1	0		WP_197257168/WP_197257168/WP_197257168	1222	KOS58088.1 DNA gyrase subunit B [Rhodococcus rhodochrous KG-21]/DNA topoisomerase (ATP-hydrolyzing) subunit B [Rhodococcus rhodochrous]	Rhodococcus rhodochrous KG-21/Rhodococcus rhodochrous	0	677	677	1	677	1	677	677	1	1	1	1	0		WP_054370848;WP_054370848	1300	gyrB	1830	WP_010595447
ENBDON_00008	DNA topoisomerase (ATP-hydrolyzing) subunit B	MAAQKSNKSNSDYGASSITVLEGLEAVRKRPGMYIGSTGERGLHHLIWEVVDNSVDEAMAGHATKVEVTLLEDGGVQVVDDGRGIPVGMHASGVPTVEVVLTQLHAGGKFDSDAYAVSGGLHGVGISVVNALSTQLQVEIDRDGYHWEQTYQSSKPGKLVKGEPTRATGTTVRFWADPDIFETTTYNFETVARRLQEMAFLNKGLTITLTDERVAPEEVTDEVVSELAEAPKKAEEQEQAEIEQQHKVKVRVYHYPGGLEDYVRHINRTKQPIHNSVVGFTAKGTGHELEVAMQWNSGYSESVHTFANTINTHEGGTHEEGFRAALTSVVNKYAKDKKLLKDKDPNLTGDDIREGLAAIISVKVGEPQFEGQTKTKLGNTEVKSFVQKACNEHLSHWLE…	677	20	0	0.9677	/data/input/nr_20241120.dmnd	DNA topoisomerase (ATP-hydrolyzing) subunit B [Rhodococcus sp. CC-R104]/MEE2031750.1 DNA topoisomerase (ATP-hydrolyzing) subunit B [Rhodococcus sp. CC-R104]	Rhodococcus sp. CC-R104/Rhodococcus sp. CC-R104	0	679	679	1	679	1	677	645	0.9499	1	1.003	1	0		WP_330151184	1208	KOS58088.1 DNA gyrase subunit B [Rhodococcus rhodochrous KG-21]/DNA topoisomerase (ATP-hydrolyzing) subunit B [Rhodococcus rhodochrous]	Rhodococcus rhodochrous KG-21/Rhodococcus rhodochrous	0	677	677	1	677	1	677	677	1	1	1	1	0		WP_054370848;WP_054370848	1300	gyrB	423618	AHZ45480
ENBDON_00008	DNA topoisomerase (ATP-hydrolyzing) subunit B	MAAQKSNKSNSDYGASSITVLEGLEAVRKRPGMYIGSTGERGLHHLIWEVVDNSVDEAMAGHATKVEVTLLEDGGVQVVDDGRGIPVGMHASGVPTVEVVLTQLHAGGKFDSDAYAVSGGLHGVGISVVNALSTQLQVEIDRDGYHWEQTYQSSKPGKLVKGEPTRATGTTVRFWADPDIFETTTYNFETVARRLQEMAFLNKGLTITLTDERVAPEEVTDEVVSELAEAPKKAEEQEQAEIEQQHKVKVRVYHYPGGLEDYVRHINRTKQPIHNSVVGFTAKGTGHELEVAMQWNSGYSESVHTFANTINTHEGGTHEEGFRAALTSVVNKYAKDKKLLKDKDPNLTGDDIREGLAAIISVKVGEPQFEGQTKTKLGNTEVKSFVQKACNEHLSHWLE…	677	20	0	0.9677	/data/input/nr_20241120.dmnd	DNA topoisomerase (ATP-hydrolyzing) subunit B [Rhodococcus sp. (in: high G+C Gram-positive bacteria)]/MBF0663419.1 DNA topoisomerase (ATP-hydrolyzing) subunit B [Rhodococcus sp. (in: high G+C Gram-positive bacteria)]/NMD95617.1 DNA topoisomerase (ATP-hydrolyzing) subunit B [Rhodococcus sp. BL-253-APC-6A1W]/NME79613.1 DNA topoisomerase (ATP-hydrolyzing) subunit B [Rhodococcus sp. 105337]	Rhodococcus sp. (in: high G+C Gram-positive bacteria)/Rhodococcus sp. (in: high G+C Gram-positive bacteria)/Rhodococcus sp. BL-253-APC-6A1W/Rhodococcus sp. 105337	0	678	678	1	678	1	677	642	0.9469	1	1.0015	1	0		WP_169621078/WP_169621078/WP_169621078	1201	KOS58088.1 DNA gyrase subunit B [Rhodococcus rhodochrous KG-21]/DNA topoisomerase (ATP-hydrolyzing) subunit B [Rhodococcus rhodochrous]	Rhodococcus rhodochrous KG-21/Rhodococcus rhodochrous	0	677	677	1	677	1	677	677	1	1	1	1	0		WP_054370848;WP_054370848	1300	gyrB	1441923	WP_054370848
ENBDON_00008	DNA topoisomerase (ATP-hydrolyzing) subunit B	MAAQKSNKSNSDYGASSITVLEGLEAVRKRPGMYIGSTGERGLHHLIWEVVDNSVDEAMAGHATKVEVTLLEDGGVQVVDDGRGIPVGMHASGVPTVEVVLTQLHAGGKFDSDAYAVSGGLHGVGISVVNALSTQLQVEIDRDGYHWEQTYQSSKPGKLVKGEPTRATGTTVRFWADPDIFETTTYNFETVARRLQEMAFLNKGLTITLTDERVAPEEVTDEVVSELAEAPKKAEEQEQAEIEQQHKVKVRVYHYPGGLEDYVRHINRTKQPIHNSVVGFTAKGTGHELEVAMQWNSGYSESVHTFANTINTHEGGTHEEGFRAALTSVVNKYAKDKKLLKDKDPNLTGDDIREGLAAIISVKVGEPQFEGQTKTKLGNTEVKSFVQKACNEHLSHWLE…	677	20	0	0.9677	/data/input/nr_20241120.dmnd	MULTISPECIES: DNA topoisomerase (ATP-hydrolyzing) subunit B [unclassified Rhodococcus (in: high G+C Gram-positive bacteria)]	unclassified Rhodococcus (in: high G+C Gram-positive bacteria)	0	695	678	18	695	1	677	642	0.9469	0.9755	1.0015	1	0		WP_206036877	1200	KOS58088.1 DNA gyrase subunit B [Rhodococcus rhodochrous KG-21]/DNA topoisomerase (ATP-hydrolyzing) subunit B [Rhodococcus rhodochrous]	Rhodococcus rhodochrous KG-21/Rhodococcus rhodochrous	0	677	677	1	677	1	677	677	1	1	1	1	0		WP_054370848;WP_054370848	1300	gyrB	423618	AHZ45480
ENBDON_00008	DNA topoisomerase (ATP-hydrolyzing) subunit B	MAAQKSNKSNSDYGASSITVLEGLEAVRKRPGMYIGSTGERGLHHLIWEVVDNSVDEAMAGHATKVEVTLLEDGGVQVVDDGRGIPVGMHASGVPTVEVVLTQLHAGGKFDSDAYAVSGGLHGVGISVVNALSTQLQVEIDRDGYHWEQTYQSSKPGKLVKGEPTRATGTTVRFWADPDIFETTTYNFETVARRLQEMAFLNKGLTITLTDERVAPEEVTDEVVSELAEAPKKAEEQEQAEIEQQHKVKVRVYHYPGGLEDYVRHINRTKQPIHNSVVGFTAKGTGHELEVAMQWNSGYSESVHTFANTINTHEGGTHEEGFRAALTSVVNKYAKDKKLLKDKDPNLTGDDIREGLAAIISVKVGEPQFEGQTKTKLGNTEVKSFVQKACNEHLSHWLE…	677	20	0	0.9677	/data/input/nr_20241120.dmnd	DNA topoisomerase (ATP-hydrolyzing) subunit B [Rhodococcus coprophilus]	Rhodococcus coprophilus	0	678	678	1	678	1	677	640	0.944	1	1.0015	1	0		WP_072701474	1199	KOS58088.1 DNA gyrase subunit B [Rhodococcus rhodochrous KG-21]/DNA topoisomerase (ATP-hydrolyzing) subunit B [Rhodococcus rhodochrous]	Rhodococcus rhodochrous KG-21/Rhodococcus rhodochrous	0	677	677	1	677	1	677	677	1	1	1	1	0		WP_054370848;WP_054370848	1300	gyrB	1830	WP_010595447
ENBDON_00008	DNA topoisomerase (ATP-hydrolyzing) subunit B	MAAQKSNKSNSDYGASSITVLEGLEAVRKRPGMYIGSTGERGLHHLIWEVVDNSVDEAMAGHATKVEVTLLEDGGVQVVDDGRGIPVGMHASGVPTVEVVLTQLHAGGKFDSDAYAVSGGLHGVGISVVNALSTQLQVEIDRDGYHWEQTYQSSKPGKLVKGEPTRATGTTVRFWADPDIFETTTYNFETVARRLQEMAFLNKGLTITLTDERVAPEEVTDEVVSELAEAPKKAEEQEQAEIEQQHKVKVRVYHYPGGLEDYVRHINRTKQPIHNSVVGFTAKGTGHELEVAMQWNSGYSESVHTFANTINTHEGGTHEEGFRAALTSVVNKYAKDKKLLKDKDPNLTGDDIREGLAAIISVKVGEPQFEGQTKTKLGNTEVKSFVQKACNEHLSHWLE…	677	20	0	0.9677	/data/input/nr_20241120.dmnd	DNA topoisomerase (ATP-hydrolyzing) subunit B [Rhodococcus artemisiae]/MEE2057910.1 DNA topoisomerase (ATP-hydrolyzing) subunit B [Rhodococcus artemisiae]	Rhodococcus artemisiae/Rhodococcus artemisiae	0	678	679	1	678	1	677	646	0.9514	1.0015	1.003	1	0		WP_330133545	1199	KOS58088.1 DNA gyrase subunit B [Rhodococcus rhodochrous KG-21]/DNA topoisomerase (ATP-hydrolyzing) subunit B [Rhodococcus rhodochrous]	Rhodococcus rhodochrous KG-21/Rhodococcus rhodochrous	0	677	677	1	677	1	677	677	1	1	1	1	0		WP_054370848;WP_054370848	1300	gyrB	1441923	WP_054370848
ENBDON_00008	DNA topoisomerase (ATP-hydrolyzing) subunit B	MAAQKSNKSNSDYGASSITVLEGLEAVRKRPGMYIGSTGERGLHHLIWEVVDNSVDEAMAGHATKVEVTLLEDGGVQVVDDGRGIPVGMHASGVPTVEVVLTQLHAGGKFDSDAYAVSGGLHGVGISVVNALSTQLQVEIDRDGYHWEQTYQSSKPGKLVKGEPTRATGTTVRFWADPDIFETTTYNFETVARRLQEMAFLNKGLTITLTDERVAPEEVTDEVVSELAEAPKKAEEQEQAEIEQQHKVKVRVYHYPGGLEDYVRHINRTKQPIHNSVVGFTAKGTGHELEVAMQWNSGYSESVHTFANTINTHEGGTHEEGFRAALTSVVNKYAKDKKLLKDKDPNLTGDDIREGLAAIISVKVGEPQFEGQTKTKLGNTEVKSFVQKACNEHLSHWLE…	677	20	0	0.9677	/data/input/nr_20241120.dmnd	MULTISPECIES: DNA topoisomerase (ATP-hydrolyzing) subunit B [Rhodococcus]/OWY83401.1 DNA gyrase subunit B [Rhodococcus sp. BUPNP1]	Rhodococcus/Rhodococcus sp. BUPNP1	0	678	678	1	678	1	677	638	0.941	1	1.0015	1	0		WP_016691073/WP_016691073	1199	KOS58088.1 DNA gyrase subunit B [Rhodococcus rhodochrous KG-21]/DNA topoisomerase (ATP-hydrolyzing) subunit B [Rhodococcus rhodochrous]	Rhodococcus rhodochrous KG-21/Rhodococcus rhodochrous	0	677	677	1	677	1	677	677	1	1	1	1	0		WP_054370848;WP_054370848	1300	gyrB	1441923	WP_054370848
ENBDON_00008	DNA topoisomerase (ATP-hydrolyzing) subunit B	MAAQKSNKSNSDYGASSITVLEGLEAVRKRPGMYIGSTGERGLHHLIWEVVDNSVDEAMAGHATKVEVTLLEDGGVQVVDDGRGIPVGMHASGVPTVEVVLTQLHAGGKFDSDAYAVSGGLHGVGISVVNALSTQLQVEIDRDGYHWEQTYQSSKPGKLVKGEPTRATGTTVRFWADPDIFETTTYNFETVARRLQEMAFLNKGLTITLTDERVAPEEVTDEVVSELAEAPKKAEEQEQAEIEQQHKVKVRVYHYPGGLEDYVRHINRTKQPIHNSVVGFTAKGTGHELEVAMQWNSGYSESVHTFANTINTHEGGTHEEGFRAALTSVVNKYAKDKKLLKDKDPNLTGDDIREGLAAIISVKVGEPQFEGQTKTKLGNTEVKSFVQKACNEHLSHWLE…	677	20	0	0.9677	/data/input/nr_20241120.dmnd	DNA gyrase subunit B [Rhodococcus coprophilus]/SQI33582.1 DNA gyrase subunit B [Rhodococcus coprophilus]	Rhodococcus coprophilus/Rhodococcus coprophilus	0	695	678	18	695	1	677	640	0.944	0.9755	1.0015	1	0		MBM7458816	1198	KOS58088.1 DNA gyrase subunit B [Rhodococcus rhodochrous KG-21]/DNA topoisomerase (ATP-hydrolyzing) subunit B [Rhodococcus rhodochrous]	Rhodococcus rhodochrous KG-21/Rhodococcus rhodochrous	0	677	677	1	677	1	677	677	1	1	1	1	0		WP_054370848;WP_054370848	1300	gyrB	191292	WP_006934474
ENBDON_00008	DNA topoisomerase (ATP-hydrolyzing) subunit B	MAAQKSNKSNSDYGASSITVLEGLEAVRKRPGMYIGSTGERGLHHLIWEVVDNSVDEAMAGHATKVEVTLLEDGGVQVVDDGRGIPVGMHASGVPTVEVVLTQLHAGGKFDSDAYAVSGGLHGVGISVVNALSTQLQVEIDRDGYHWEQTYQSSKPGKLVKGEPTRATGTTVRFWADPDIFETTTYNFETVARRLQEMAFLNKGLTITLTDERVAPEEVTDEVVSELAEAPKKAEEQEQAEIEQQHKVKVRVYHYPGGLEDYVRHINRTKQPIHNSVVGFTAKGTGHELEVAMQWNSGYSESVHTFANTINTHEGGTHEEGFRAALTSVVNKYAKDKKLLKDKDPNLTGDDIREGLAAIISVKVGEPQFEGQTKTKLGNTEVKSFVQKACNEHLSHWLE…	677	20	0	0.9677	/data/input/nr_20241120.dmnd																			KOS58088.1 DNA gyrase subunit B [Rhodococcus rhodochrous KG-21]/DNA topoisomerase (ATP-hydrolyzing) subunit B [Rhodococcus rhodochrous]	Rhodococcus rhodochrous KG-21/Rhodococcus rhodochrous	0	677	677	1	677	1	677	677	1	1	1	1	0		WP_054370848;WP_054370848	1300	gyrB	1830	WP_010595447
ENBDON_00008	DNA topoisomerase (ATP-hydrolyzing) subunit B	MAAQKSNKSNSDYGASSITVLEGLEAVRKRPGMYIGSTGERGLHHLIWEVVDNSVDEAMAGHATKVEVTLLEDGGVQVVDDGRGIPVGMHASGVPTVEVVLTQLHAGGKFDSDAYAVSGGLHGVGISVVNALSTQLQVEIDRDGYHWEQTYQSSKPGKLVKGEPTRATGTTVRFWADPDIFETTTYNFETVARRLQEMAFLNKGLTITLTDERVAPEEVTDEVVSELAEAPKKAEEQEQAEIEQQHKVKVRVYHYPGGLEDYVRHINRTKQPIHNSVVGFTAKGTGHELEVAMQWNSGYSESVHTFANTINTHEGGTHEEGFRAALTSVVNKYAKDKKLLKDKDPNLTGDDIREGLAAIISVKVGEPQFEGQTKTKLGNTEVKSFVQKACNEHLSHWLE…	677	20	0	0.9677	/data/input/nr_20241120.dmnd																			KOS58088.1 DNA gyrase subunit B [Rhodococcus rhodochrous KG-21]/DNA topoisomerase (ATP-hydrolyzing) subunit B [Rhodococcus rhodochrous]	Rhodococcus rhodochrous KG-21/Rhodococcus rhodochrous	0	677	677	1	677	1	677	677	1	1	1	1	0		WP_054370848;WP_054370848	1300	gyrB	1441923	WP_054370848
ENBDON_00008	DNA topoisomerase (ATP-hydrolyzing) subunit B	MAAQKSNKSNSDYGASSITVLEGLEAVRKRPGMYIGSTGERGLHHLIWEVVDNSVDEAMAGHATKVEVTLLEDGGVQVVDDGRGIPVGMHASGVPTVEVVLTQLHAGGKFDSDAYAVSGGLHGVGISVVNALSTQLQVEIDRDGYHWEQTYQSSKPGKLVKGEPTRATGTTVRFWADPDIFETTTYNFETVARRLQEMAFLNKGLTITLTDERVAPEEVTDEVVSELAEAPKKAEEQEQAEIEQQHKVKVRVYHYPGGLEDYVRHINRTKQPIHNSVVGFTAKGTGHELEVAMQWNSGYSESVHTFANTINTHEGGTHEEGFRAALTSVVNKYAKDKKLLKDKDPNLTGDDIREGLAAIISVKVGEPQFEGQTKTKLGNTEVKSFVQKACNEHLSHWLE…	677	20	0	0.9677	/data/input/nr_20241120.dmnd																			KOS58088.1 DNA gyrase subunit B [Rhodococcus rhodochrous KG-21]/DNA topoisomerase (ATP-hydrolyzing) subunit B [Rhodococcus rhodochrous]	Rhodococcus rhodochrous KG-21/Rhodococcus rhodochrous	0	677	677	1	677	1	677	677	1	1	1	1	0		WP_054370848;WP_054370848	1300	gyrB	1278076	WP_003936639
ENBDON_00008	DNA topoisomerase (ATP-hydrolyzing) subunit B	MAAQKSNKSNSDYGASSITVLEGLEAVRKRPGMYIGSTGERGLHHLIWEVVDNSVDEAMAGHATKVEVTLLEDGGVQVVDDGRGIPVGMHASGVPTVEVVLTQLHAGGKFDSDAYAVSGGLHGVGISVVNALSTQLQVEIDRDGYHWEQTYQSSKPGKLVKGEPTRATGTTVRFWADPDIFETTTYNFETVARRLQEMAFLNKGLTITLTDERVAPEEVTDEVVSELAEAPKKAEEQEQAEIEQQHKVKVRVYHYPGGLEDYVRHINRTKQPIHNSVVGFTAKGTGHELEVAMQWNSGYSESVHTFANTINTHEGGTHEEGFRAALTSVVNKYAKDKKLLKDKDPNLTGDDIREGLAAIISVKVGEPQFEGQTKTKLGNTEVKSFVQKACNEHLSHWLE…	677	20	0	0.9677	/data/input/nr_20241120.dmnd																			KOS58088.1 DNA gyrase subunit B [Rhodococcus rhodochrous KG-21]/DNA topoisomerase (ATP-hydrolyzing) subunit B [Rhodococcus rhodochrous]	Rhodococcus rhodochrous KG-21/Rhodococcus rhodochrous	0	677	677	1	677	1	677	677	1	1	1	1	0		WP_054370848;WP_054370848	1300	gyrB	1830	WP_010595447
ENBDON_00008	DNA topoisomerase (ATP-hydrolyzing) subunit B	MAAQKSNKSNSDYGASSITVLEGLEAVRKRPGMYIGSTGERGLHHLIWEVVDNSVDEAMAGHATKVEVTLLEDGGVQVVDDGRGIPVGMHASGVPTVEVVLTQLHAGGKFDSDAYAVSGGLHGVGISVVNALSTQLQVEIDRDGYHWEQTYQSSKPGKLVKGEPTRATGTTVRFWADPDIFETTTYNFETVARRLQEMAFLNKGLTITLTDERVAPEEVTDEVVSELAEAPKKAEEQEQAEIEQQHKVKVRVYHYPGGLEDYVRHINRTKQPIHNSVVGFTAKGTGHELEVAMQWNSGYSESVHTFANTINTHEGGTHEEGFRAALTSVVNKYAKDKKLLKDKDPNLTGDDIREGLAAIISVKVGEPQFEGQTKTKLGNTEVKSFVQKACNEHLSHWLE…	677	20	0	0.9677	/data/input/nr_20241120.dmnd																			KOS58088.1 DNA gyrase subunit B [Rhodococcus rhodochrous KG-21]/DNA topoisomerase (ATP-hydrolyzing) subunit B [Rhodococcus rhodochrous]	Rhodococcus rhodochrous KG-21/Rhodococcus rhodochrous	0	677	677	1	677	1	677	677	1	1	1	1	0		WP_054370848;WP_054370848	1300	gyrB	1441923	WP_054370848
ENBDON_00008	DNA topoisomerase (ATP-hydrolyzing) subunit B	MAAQKSNKSNSDYGASSITVLEGLEAVRKRPGMYIGSTGERGLHHLIWEVVDNSVDEAMAGHATKVEVTLLEDGGVQVVDDGRGIPVGMHASGVPTVEVVLTQLHAGGKFDSDAYAVSGGLHGVGISVVNALSTQLQVEIDRDGYHWEQTYQSSKPGKLVKGEPTRATGTTVRFWADPDIFETTTYNFETVARRLQEMAFLNKGLTITLTDERVAPEEVTDEVVSELAEAPKKAEEQEQAEIEQQHKVKVRVYHYPGGLEDYVRHINRTKQPIHNSVVGFTAKGTGHELEVAMQWNSGYSESVHTFANTINTHEGGTHEEGFRAALTSVVNKYAKDKKLLKDKDPNLTGDDIREGLAAIISVKVGEPQFEGQTKTKLGNTEVKSFVQKACNEHLSHWLE…	677	20	0	0.9677	/data/input/nr_20241120.dmnd																			KOS58088.1 DNA gyrase subunit B [Rhodococcus rhodochrous KG-21]/DNA topoisomerase (ATP-hydrolyzing) subunit B [Rhodococcus rhodochrous]	Rhodococcus rhodochrous KG-21/Rhodococcus rhodochrous	0	677	677	1	677	1	677	677	1	1	1	1	0		WP_054370848;WP_054370848	1300	gyrB	191292	WP_006934474
ENBDON_00008	DNA topoisomerase (ATP-hydrolyzing) subunit B	MAAQKSNKSNSDYGASSITVLEGLEAVRKRPGMYIGSTGERGLHHLIWEVVDNSVDEAMAGHATKVEVTLLEDGGVQVVDDGRGIPVGMHASGVPTVEVVLTQLHAGGKFDSDAYAVSGGLHGVGISVVNALSTQLQVEIDRDGYHWEQTYQSSKPGKLVKGEPTRATGTTVRFWADPDIFETTTYNFETVARRLQEMAFLNKGLTITLTDERVAPEEVTDEVVSELAEAPKKAEEQEQAEIEQQHKVKVRVYHYPGGLEDYVRHINRTKQPIHNSVVGFTAKGTGHELEVAMQWNSGYSESVHTFANTINTHEGGTHEEGFRAALTSVVNKYAKDKKLLKDKDPNLTGDDIREGLAAIISVKVGEPQFEGQTKTKLGNTEVKSFVQKACNEHLSHWLE…	677	20	0	0.9677	/data/input/nr_20241120.dmnd																			KOS58088.1 DNA gyrase subunit B [Rhodococcus rhodochrous KG-21]/DNA topoisomerase (ATP-hydrolyzing) subunit B [Rhodococcus rhodochrous]	Rhodococcus rhodochrous KG-21/Rhodococcus rhodochrous	0	677	677	1	677	1	677	677	1	1	1	1	0		WP_054370848;WP_054370848	1300	gyrB	1830	WP_010595447
ENBDON_00008	DNA topoisomerase (ATP-hydrolyzing) subunit B	MAAQKSNKSNSDYGASSITVLEGLEAVRKRPGMYIGSTGERGLHHLIWEVVDNSVDEAMAGHATKVEVTLLEDGGVQVVDDGRGIPVGMHASGVPTVEVVLTQLHAGGKFDSDAYAVSGGLHGVGISVVNALSTQLQVEIDRDGYHWEQTYQSSKPGKLVKGEPTRATGTTVRFWADPDIFETTTYNFETVARRLQEMAFLNKGLTITLTDERVAPEEVTDEVVSELAEAPKKAEEQEQAEIEQQHKVKVRVYHYPGGLEDYVRHINRTKQPIHNSVVGFTAKGTGHELEVAMQWNSGYSESVHTFANTINTHEGGTHEEGFRAALTSVVNKYAKDKKLLKDKDPNLTGDDIREGLAAIISVKVGEPQFEGQTKTKLGNTEVKSFVQKACNEHLSHWLE…	677	20	0	0.9677	/data/input/nr_20241120.dmnd																			KOS58088.1 DNA gyrase subunit B [Rhodococcus rhodochrous KG-21]/DNA topoisomerase (ATP-hydrolyzing) subunit B [Rhodococcus rhodochrous]	Rhodococcus rhodochrous KG-21/Rhodococcus rhodochrous	0	677	677	1	677	1	677	677	1	1	1	1	0		WP_054370848;WP_054370848	1300	gyrB	1278076	WP_003936639
ENBDON_00008	DNA topoisomerase (ATP-hydrolyzing) subunit B	MAAQKSNKSNSDYGASSITVLEGLEAVRKRPGMYIGSTGERGLHHLIWEVVDNSVDEAMAGHATKVEVTLLEDGGVQVVDDGRGIPVGMHASGVPTVEVVLTQLHAGGKFDSDAYAVSGGLHGVGISVVNALSTQLQVEIDRDGYHWEQTYQSSKPGKLVKGEPTRATGTTVRFWADPDIFETTTYNFETVARRLQEMAFLNKGLTITLTDERVAPEEVTDEVVSELAEAPKKAEEQEQAEIEQQHKVKVRVYHYPGGLEDYVRHINRTKQPIHNSVVGFTAKGTGHELEVAMQWNSGYSESVHTFANTINTHEGGTHEEGFRAALTSVVNKYAKDKKLLKDKDPNLTGDDIREGLAAIISVKVGEPQFEGQTKTKLGNTEVKSFVQKACNEHLSHWLE…	677	20	0	0.9677	/data/input/nr_20241120.dmnd																			KOS58088.1 DNA gyrase subunit B [Rhodococcus rhodochrous KG-21]/DNA topoisomerase (ATP-hydrolyzing) subunit B [Rhodococcus rhodochrous]	Rhodococcus rhodochrous KG-21/Rhodococcus rhodochrous	0	677	677	1	677	1	677	677	1	1	1	1	0		WP_054370848;WP_054370848	1300	gyrB	191292	WP_006934474
ENBDON_00008	DNA topoisomerase (ATP-hydrolyzing) subunit B	MAAQKSNKSNSDYGASSITVLEGLEAVRKRPGMYIGSTGERGLHHLIWEVVDNSVDEAMAGHATKVEVTLLEDGGVQVVDDGRGIPVGMHASGVPTVEVVLTQLHAGGKFDSDAYAVSGGLHGVGISVVNALSTQLQVEIDRDGYHWEQTYQSSKPGKLVKGEPTRATGTTVRFWADPDIFETTTYNFETVARRLQEMAFLNKGLTITLTDERVAPEEVTDEVVSELAEAPKKAEEQEQAEIEQQHKVKVRVYHYPGGLEDYVRHINRTKQPIHNSVVGFTAKGTGHELEVAMQWNSGYSESVHTFANTINTHEGGTHEEGFRAALTSVVNKYAKDKKLLKDKDPNLTGDDIREGLAAIISVKVGEPQFEGQTKTKLGNTEVKSFVQKACNEHLSHWLE…	677	20	0	0.9677	/data/input/nr_20241120.dmnd																			KOS58088.1 DNA gyrase subunit B [Rhodococcus rhodochrous KG-21]/DNA topoisomerase (ATP-hydrolyzing) subunit B [Rhodococcus rhodochrous]	Rhodococcus rhodochrous KG-21/Rhodococcus rhodochrous	0	677	677	1	677	1	677	677	1	1	1	1	0		WP_054370848;WP_054370848	1300	gyrB	423618	AHZ45480
ENBDON_00008	DNA topoisomerase (ATP-hydrolyzing) subunit B	MAAQKSNKSNSDYGASSITVLEGLEAVRKRPGMYIGSTGERGLHHLIWEVVDNSVDEAMAGHATKVEVTLLEDGGVQVVDDGRGIPVGMHASGVPTVEVVLTQLHAGGKFDSDAYAVSGGLHGVGISVVNALSTQLQVEIDRDGYHWEQTYQSSKPGKLVKGEPTRATGTTVRFWADPDIFETTTYNFETVARRLQEMAFLNKGLTITLTDERVAPEEVTDEVVSELAEAPKKAEEQEQAEIEQQHKVKVRVYHYPGGLEDYVRHINRTKQPIHNSVVGFTAKGTGHELEVAMQWNSGYSESVHTFANTINTHEGGTHEEGFRAALTSVVNKYAKDKKLLKDKDPNLTGDDIREGLAAIISVKVGEPQFEGQTKTKLGNTEVKSFVQKACNEHLSHWLE…	677	20	0	0.9677	/data/input/nr_20241120.dmnd																			KOS58088.1 DNA gyrase subunit B [Rhodococcus rhodochrous KG-21]/DNA topoisomerase (ATP-hydrolyzing) subunit B [Rhodococcus rhodochrous]	Rhodococcus rhodochrous KG-21/Rhodococcus rhodochrous	0	677	677	1	677	1	677	677	1	1	1	1	0		WP_054370848;WP_054370848	1300	gyrB	1278076	WP_003936639
ENBDON_00008	DNA topoisomerase (ATP-hydrolyzing) subunit B	MAAQKSNKSNSDYGASSITVLEGLEAVRKRPGMYIGSTGERGLHHLIWEVVDNSVDEAMAGHATKVEVTLLEDGGVQVVDDGRGIPVGMHASGVPTVEVVLTQLHAGGKFDSDAYAVSGGLHGVGISVVNALSTQLQVEIDRDGYHWEQTYQSSKPGKLVKGEPTRATGTTVRFWADPDIFETTTYNFETVARRLQEMAFLNKGLTITLTDERVAPEEVTDEVVSELAEAPKKAEEQEQAEIEQQHKVKVRVYHYPGGLEDYVRHINRTKQPIHNSVVGFTAKGTGHELEVAMQWNSGYSESVHTFANTINTHEGGTHEEGFRAALTSVVNKYAKDKKLLKDKDPNLTGDDIREGLAAIISVKVGEPQFEGQTKTKLGNTEVKSFVQKACNEHLSHWLE…	677	20	0	0.9677	/data/input/nr_20241120.dmnd																			KOS58088.1 DNA gyrase subunit B [Rhodococcus rhodochrous KG-21]/DNA topoisomerase (ATP-hydrolyzing) subunit B [Rhodococcus rhodochrous]	Rhodococcus rhodochrous KG-21/Rhodococcus rhodochrous	0	677	677	1	677	1	677	677	1	1	1	1	0		WP_054370848;WP_054370848	1300	gyrB	1830	WP_010595447
ENBDON_00008	DNA topoisomerase (ATP-hydrolyzing) subunit B	MAAQKSNKSNSDYGASSITVLEGLEAVRKRPGMYIGSTGERGLHHLIWEVVDNSVDEAMAGHATKVEVTLLEDGGVQVVDDGRGIPVGMHASGVPTVEVVLTQLHAGGKFDSDAYAVSGGLHGVGISVVNALSTQLQVEIDRDGYHWEQTYQSSKPGKLVKGEPTRATGTTVRFWADPDIFETTTYNFETVARRLQEMAFLNKGLTITLTDERVAPEEVTDEVVSELAEAPKKAEEQEQAEIEQQHKVKVRVYHYPGGLEDYVRHINRTKQPIHNSVVGFTAKGTGHELEVAMQWNSGYSESVHTFANTINTHEGGTHEEGFRAALTSVVNKYAKDKKLLKDKDPNLTGDDIREGLAAIISVKVGEPQFEGQTKTKLGNTEVKSFVQKACNEHLSHWLE…	677	20	0	0.9677	/data/input/nr_20241120.dmnd																			KOS58088.1 DNA gyrase subunit B [Rhodococcus rhodochrous KG-21]/DNA topoisomerase (ATP-hydrolyzing) subunit B [Rhodococcus rhodochrous]	Rhodococcus rhodochrous KG-21/Rhodococcus rhodochrous	0	677	677	1	677	1	677	677	1	1	1	1	0		WP_054370848;WP_054370848	1300	gyrB	191292	WP_006934474
ENBDON_00008	DNA topoisomerase (ATP-hydrolyzing) subunit B	MAAQKSNKSNSDYGASSITVLEGLEAVRKRPGMYIGSTGERGLHHLIWEVVDNSVDEAMAGHATKVEVTLLEDGGVQVVDDGRGIPVGMHASGVPTVEVVLTQLHAGGKFDSDAYAVSGGLHGVGISVVNALSTQLQVEIDRDGYHWEQTYQSSKPGKLVKGEPTRATGTTVRFWADPDIFETTTYNFETVARRLQEMAFLNKGLTITLTDERVAPEEVTDEVVSELAEAPKKAEEQEQAEIEQQHKVKVRVYHYPGGLEDYVRHINRTKQPIHNSVVGFTAKGTGHELEVAMQWNSGYSESVHTFANTINTHEGGTHEEGFRAALTSVVNKYAKDKKLLKDKDPNLTGDDIREGLAAIISVKVGEPQFEGQTKTKLGNTEVKSFVQKACNEHLSHWLE…	677	20	0	0.9677	/data/input/nr_20241120.dmnd																			KOS58088.1 DNA gyrase subunit B [Rhodococcus rhodochrous KG-21]/DNA topoisomerase (ATP-hydrolyzing) subunit B [Rhodococcus rhodochrous]	Rhodococcus rhodochrous KG-21/Rhodococcus rhodochrous	0	677	677	1	677	1	677	677	1	1	1	1	0		WP_054370848;WP_054370848	1300	gyrB	1830	WP_010595447
ENBDON_00008	DNA topoisomerase (ATP-hydrolyzing) subunit B	MAAQKSNKSNSDYGASSITVLEGLEAVRKRPGMYIGSTGERGLHHLIWEVVDNSVDEAMAGHATKVEVTLLEDGGVQVVDDGRGIPVGMHASGVPTVEVVLTQLHAGGKFDSDAYAVSGGLHGVGISVVNALSTQLQVEIDRDGYHWEQTYQSSKPGKLVKGEPTRATGTTVRFWADPDIFETTTYNFETVARRLQEMAFLNKGLTITLTDERVAPEEVTDEVVSELAEAPKKAEEQEQAEIEQQHKVKVRVYHYPGGLEDYVRHINRTKQPIHNSVVGFTAKGTGHELEVAMQWNSGYSESVHTFANTINTHEGGTHEEGFRAALTSVVNKYAKDKKLLKDKDPNLTGDDIREGLAAIISVKVGEPQFEGQTKTKLGNTEVKSFVQKACNEHLSHWLE…	677	20	0	0.9677	/data/input/nr_20241120.dmnd																			KOS58088.1 DNA gyrase subunit B [Rhodococcus rhodochrous KG-21]/DNA topoisomerase (ATP-hydrolyzing) subunit B [Rhodococcus rhodochrous]	Rhodococcus rhodochrous KG-21/Rhodococcus rhodochrous	0	677	677	1	677	1	677	677	1	1	1	1	0		WP_054370848;WP_054370848	1300	gyrB	1278076	WP_003936639
ENBDON_00008	DNA topoisomerase (ATP-hydrolyzing) subunit B	MAAQKSNKSNSDYGASSITVLEGLEAVRKRPGMYIGSTGERGLHHLIWEVVDNSVDEAMAGHATKVEVTLLEDGGVQVVDDGRGIPVGMHASGVPTVEVVLTQLHAGGKFDSDAYAVSGGLHGVGISVVNALSTQLQVEIDRDGYHWEQTYQSSKPGKLVKGEPTRATGTTVRFWADPDIFETTTYNFETVARRLQEMAFLNKGLTITLTDERVAPEEVTDEVVSELAEAPKKAEEQEQAEIEQQHKVKVRVYHYPGGLEDYVRHINRTKQPIHNSVVGFTAKGTGHELEVAMQWNSGYSESVHTFANTINTHEGGTHEEGFRAALTSVVNKYAKDKKLLKDKDPNLTGDDIREGLAAIISVKVGEPQFEGQTKTKLGNTEVKSFVQKACNEHLSHWLE…	677	20	0	0.9677	/data/input/nr_20241120.dmnd																			KOS58088.1 DNA gyrase subunit B [Rhodococcus rhodochrous KG-21]/DNA topoisomerase (ATP-hydrolyzing) subunit B [Rhodococcus rhodochrous]	Rhodococcus rhodochrous KG-21/Rhodococcus rhodochrous	0	677	677	1	677	1	677	677	1	1	1	1	0		WP_054370848;WP_054370848	1300	gyrB	1830	WP_010595447
ENBDON_00008	DNA topoisomerase (ATP-hydrolyzing) subunit B	MAAQKSNKSNSDYGASSITVLEGLEAVRKRPGMYIGSTGERGLHHLIWEVVDNSVDEAMAGHATKVEVTLLEDGGVQVVDDGRGIPVGMHASGVPTVEVVLTQLHAGGKFDSDAYAVSGGLHGVGISVVNALSTQLQVEIDRDGYHWEQTYQSSKPGKLVKGEPTRATGTTVRFWADPDIFETTTYNFETVARRLQEMAFLNKGLTITLTDERVAPEEVTDEVVSELAEAPKKAEEQEQAEIEQQHKVKVRVYHYPGGLEDYVRHINRTKQPIHNSVVGFTAKGTGHELEVAMQWNSGYSESVHTFANTINTHEGGTHEEGFRAALTSVVNKYAKDKKLLKDKDPNLTGDDIREGLAAIISVKVGEPQFEGQTKTKLGNTEVKSFVQKACNEHLSHWLE…	677	20	0	0.9677	/data/input/nr_20241120.dmnd																			KOS58088.1 DNA gyrase subunit B [Rhodococcus rhodochrous KG-21]/DNA topoisomerase (ATP-hydrolyzing) subunit B [Rhodococcus rhodochrous]	Rhodococcus rhodochrous KG-21/Rhodococcus rhodochrous	0	677	677	1	677	1	677	677	1	1	1	1	0		WP_054370848;WP_054370848	1300	gyrB	1830	WP_010595447
ENBDON_00008	DNA topoisomerase (ATP-hydrolyzing) subunit B	MAAQKSNKSNSDYGASSITVLEGLEAVRKRPGMYIGSTGERGLHHLIWEVVDNSVDEAMAGHATKVEVTLLEDGGVQVVDDGRGIPVGMHASGVPTVEVVLTQLHAGGKFDSDAYAVSGGLHGVGISVVNALSTQLQVEIDRDGYHWEQTYQSSKPGKLVKGEPTRATGTTVRFWADPDIFETTTYNFETVARRLQEMAFLNKGLTITLTDERVAPEEVTDEVVSELAEAPKKAEEQEQAEIEQQHKVKVRVYHYPGGLEDYVRHINRTKQPIHNSVVGFTAKGTGHELEVAMQWNSGYSESVHTFANTINTHEGGTHEEGFRAALTSVVNKYAKDKKLLKDKDPNLTGDDIREGLAAIISVKVGEPQFEGQTKTKLGNTEVKSFVQKACNEHLSHWLE…	677	20	0	0.9677	/data/input/nr_20241120.dmnd																			KOS58088.1 DNA gyrase subunit B [Rhodococcus rhodochrous KG-21]/DNA topoisomerase (ATP-hydrolyzing) subunit B [Rhodococcus rhodochrous]	Rhodococcus rhodochrous KG-21/Rhodococcus rhodochrous	0	677	677	1	677	1	677	677	1	1	1	1	0		WP_054370848;WP_054370848	1300	gyrB	1441923	WP_054370848
ENBDON_00008	DNA topoisomerase (ATP-hydrolyzing) subunit B	MAAQKSNKSNSDYGASSITVLEGLEAVRKRPGMYIGSTGERGLHHLIWEVVDNSVDEAMAGHATKVEVTLLEDGGVQVVDDGRGIPVGMHASGVPTVEVVLTQLHAGGKFDSDAYAVSGGLHGVGISVVNALSTQLQVEIDRDGYHWEQTYQSSKPGKLVKGEPTRATGTTVRFWADPDIFETTTYNFETVARRLQEMAFLNKGLTITLTDERVAPEEVTDEVVSELAEAPKKAEEQEQAEIEQQHKVKVRVYHYPGGLEDYVRHINRTKQPIHNSVVGFTAKGTGHELEVAMQWNSGYSESVHTFANTINTHEGGTHEEGFRAALTSVVNKYAKDKKLLKDKDPNLTGDDIREGLAAIISVKVGEPQFEGQTKTKLGNTEVKSFVQKACNEHLSHWLE…	677	20	0	0.9677	/data/input/nr_20241120.dmnd																			KOS58088.1 DNA gyrase subunit B [Rhodococcus rhodochrous KG-21]/DNA topoisomerase (ATP-hydrolyzing) subunit B [Rhodococcus rhodochrous]	Rhodococcus rhodochrous KG-21/Rhodococcus rhodochrous	0	677	677	1	677	1	677	677	1	1	1	1	0		WP_054370848;WP_054370848	1300	gyrB	191292	WP_006934474
ENBDON_00008	DNA topoisomerase (ATP-hydrolyzing) subunit B	MAAQKSNKSNSDYGASSITVLEGLEAVRKRPGMYIGSTGERGLHHLIWEVVDNSVDEAMAGHATKVEVTLLEDGGVQVVDDGRGIPVGMHASGVPTVEVVLTQLHAGGKFDSDAYAVSGGLHGVGISVVNALSTQLQVEIDRDGYHWEQTYQSSKPGKLVKGEPTRATGTTVRFWADPDIFETTTYNFETVARRLQEMAFLNKGLTITLTDERVAPEEVTDEVVSELAEAPKKAEEQEQAEIEQQHKVKVRVYHYPGGLEDYVRHINRTKQPIHNSVVGFTAKGTGHELEVAMQWNSGYSESVHTFANTINTHEGGTHEEGFRAALTSVVNKYAKDKKLLKDKDPNLTGDDIREGLAAIISVKVGEPQFEGQTKTKLGNTEVKSFVQKACNEHLSHWLE…	677	20	0	0.9677	/data/input/nr_20241120.dmnd																			KOS58088.1 DNA gyrase subunit B [Rhodococcus rhodochrous KG-21]/DNA topoisomerase (ATP-hydrolyzing) subunit B [Rhodococcus rhodochrous]	Rhodococcus rhodochrous KG-21/Rhodococcus rhodochrous	0	677	677	1	677	1	677	677	1	1	1	1	0		WP_054370848;WP_054370848	1300	gyrB	1441923	WP_054370848
ENBDON_00008	DNA topoisomerase (ATP-hydrolyzing) subunit B	MAAQKSNKSNSDYGASSITVLEGLEAVRKRPGMYIGSTGERGLHHLIWEVVDNSVDEAMAGHATKVEVTLLEDGGVQVVDDGRGIPVGMHASGVPTVEVVLTQLHAGGKFDSDAYAVSGGLHGVGISVVNALSTQLQVEIDRDGYHWEQTYQSSKPGKLVKGEPTRATGTTVRFWADPDIFETTTYNFETVARRLQEMAFLNKGLTITLTDERVAPEEVTDEVVSELAEAPKKAEEQEQAEIEQQHKVKVRVYHYPGGLEDYVRHINRTKQPIHNSVVGFTAKGTGHELEVAMQWNSGYSESVHTFANTINTHEGGTHEEGFRAALTSVVNKYAKDKKLLKDKDPNLTGDDIREGLAAIISVKVGEPQFEGQTKTKLGNTEVKSFVQKACNEHLSHWLE…	677	20	0	0.9677	/data/input/nr_20241120.dmnd																			KOS58088.1 DNA gyrase subunit B [Rhodococcus rhodochrous KG-21]/DNA topoisomerase (ATP-hydrolyzing) subunit B [Rhodococcus rhodochrous]	Rhodococcus rhodochrous KG-21/Rhodococcus rhodochrous	0	677	677	1	677	1	677	677	1	1	1	1	0		WP_054370848;WP_054370848	1300	gyrB	1441923	WP_054370848
ENBDON_00008	DNA topoisomerase (ATP-hydrolyzing) subunit B	MAAQKSNKSNSDYGASSITVLEGLEAVRKRPGMYIGSTGERGLHHLIWEVVDNSVDEAMAGHATKVEVTLLEDGGVQVVDDGRGIPVGMHASGVPTVEVVLTQLHAGGKFDSDAYAVSGGLHGVGISVVNALSTQLQVEIDRDGYHWEQTYQSSKPGKLVKGEPTRATGTTVRFWADPDIFETTTYNFETVARRLQEMAFLNKGLTITLTDERVAPEEVTDEVVSELAEAPKKAEEQEQAEIEQQHKVKVRVYHYPGGLEDYVRHINRTKQPIHNSVVGFTAKGTGHELEVAMQWNSGYSESVHTFANTINTHEGGTHEEGFRAALTSVVNKYAKDKKLLKDKDPNLTGDDIREGLAAIISVKVGEPQFEGQTKTKLGNTEVKSFVQKACNEHLSHWLE…	677	20	0	0.9677	/data/input/nr_20241120.dmnd																			KOS58088.1 DNA gyrase subunit B [Rhodococcus rhodochrous KG-21]/DNA topoisomerase (ATP-hydrolyzing) subunit B [Rhodococcus rhodochrous]	Rhodococcus rhodochrous KG-21/Rhodococcus rhodochrous	0	677	677	1	677	1	677	677	1	1	1	1	0		WP_054370848;WP_054370848	1300	gyrB	191292	WP_006934474
ENBDON_00008	DNA topoisomerase (ATP-hydrolyzing) subunit B	MAAQKSNKSNSDYGASSITVLEGLEAVRKRPGMYIGSTGERGLHHLIWEVVDNSVDEAMAGHATKVEVTLLEDGGVQVVDDGRGIPVGMHASGVPTVEVVLTQLHAGGKFDSDAYAVSGGLHGVGISVVNALSTQLQVEIDRDGYHWEQTYQSSKPGKLVKGEPTRATGTTVRFWADPDIFETTTYNFETVARRLQEMAFLNKGLTITLTDERVAPEEVTDEVVSELAEAPKKAEEQEQAEIEQQHKVKVRVYHYPGGLEDYVRHINRTKQPIHNSVVGFTAKGTGHELEVAMQWNSGYSESVHTFANTINTHEGGTHEEGFRAALTSVVNKYAKDKKLLKDKDPNLTGDDIREGLAAIISVKVGEPQFEGQTKTKLGNTEVKSFVQKACNEHLSHWLE…	677	20	0	0.9677	/data/input/nr_20241120.dmnd																			KOS58088.1 DNA gyrase subunit B [Rhodococcus rhodochrous KG-21]/DNA topoisomerase (ATP-hydrolyzing) subunit B [Rhodococcus rhodochrous]	Rhodococcus rhodochrous KG-21/Rhodococcus rhodochrous	0	677	677	1	677	1	677	677	1	1	1	1	0		WP_054370848;WP_054370848	1300	gyrB	1278076	WP_003936639
ENBDON_00008	DNA topoisomerase (ATP-hydrolyzing) subunit B	MAAQKSNKSNSDYGASSITVLEGLEAVRKRPGMYIGSTGERGLHHLIWEVVDNSVDEAMAGHATKVEVTLLEDGGVQVVDDGRGIPVGMHASGVPTVEVVLTQLHAGGKFDSDAYAVSGGLHGVGISVVNALSTQLQVEIDRDGYHWEQTYQSSKPGKLVKGEPTRATGTTVRFWADPDIFETTTYNFETVARRLQEMAFLNKGLTITLTDERVAPEEVTDEVVSELAEAPKKAEEQEQAEIEQQHKVKVRVYHYPGGLEDYVRHINRTKQPIHNSVVGFTAKGTGHELEVAMQWNSGYSESVHTFANTINTHEGGTHEEGFRAALTSVVNKYAKDKKLLKDKDPNLTGDDIREGLAAIISVKVGEPQFEGQTKTKLGNTEVKSFVQKACNEHLSHWLE…	677	20	0	0.9677	/data/input/nr_20241120.dmnd																			KOS58088.1 DNA gyrase subunit B [Rhodococcus rhodochrous KG-21]/DNA topoisomerase (ATP-hydrolyzing) subunit B [Rhodococcus rhodochrous]	Rhodococcus rhodochrous KG-21/Rhodococcus rhodochrous	0	677	677	1	677	1	677	677	1	1	1	1	0		WP_054370848;WP_054370848	1300	gyrB	1278076	WP_003936639
ENBDON_00008	DNA topoisomerase (ATP-hydrolyzing) subunit B	MAAQKSNKSNSDYGASSITVLEGLEAVRKRPGMYIGSTGERGLHHLIWEVVDNSVDEAMAGHATKVEVTLLEDGGVQVVDDGRGIPVGMHASGVPTVEVVLTQLHAGGKFDSDAYAVSGGLHGVGISVVNALSTQLQVEIDRDGYHWEQTYQSSKPGKLVKGEPTRATGTTVRFWADPDIFETTTYNFETVARRLQEMAFLNKGLTITLTDERVAPEEVTDEVVSELAEAPKKAEEQEQAEIEQQHKVKVRVYHYPGGLEDYVRHINRTKQPIHNSVVGFTAKGTGHELEVAMQWNSGYSESVHTFANTINTHEGGTHEEGFRAALTSVVNKYAKDKKLLKDKDPNLTGDDIREGLAAIISVKVGEPQFEGQTKTKLGNTEVKSFVQKACNEHLSHWLE…	677	20	0	0.9677	/data/input/nr_20241120.dmnd																			KOS58088.1 DNA gyrase subunit B [Rhodococcus rhodochrous KG-21]/DNA topoisomerase (ATP-hydrolyzing) subunit B [Rhodococcus rhodochrous]	Rhodococcus rhodochrous KG-21/Rhodococcus rhodochrous	0	677	677	1	677	1	677	677	1	1	1	1	0		WP_054370848;WP_054370848	1300	gyrB	1441923	WP_054370848
ENBDON_00008	DNA topoisomerase (ATP-hydrolyzing) subunit B	MAAQKSNKSNSDYGASSITVLEGLEAVRKRPGMYIGSTGERGLHHLIWEVVDNSVDEAMAGHATKVEVTLLEDGGVQVVDDGRGIPVGMHASGVPTVEVVLTQLHAGGKFDSDAYAVSGGLHGVGISVVNALSTQLQVEIDRDGYHWEQTYQSSKPGKLVKGEPTRATGTTVRFWADPDIFETTTYNFETVARRLQEMAFLNKGLTITLTDERVAPEEVTDEVVSELAEAPKKAEEQEQAEIEQQHKVKVRVYHYPGGLEDYVRHINRTKQPIHNSVVGFTAKGTGHELEVAMQWNSGYSESVHTFANTINTHEGGTHEEGFRAALTSVVNKYAKDKKLLKDKDPNLTGDDIREGLAAIISVKVGEPQFEGQTKTKLGNTEVKSFVQKACNEHLSHWLE…	677	20	0	0.9677	/data/input/nr_20241120.dmnd																			KOS58088.1 DNA gyrase subunit B [Rhodococcus rhodochrous KG-21]/DNA topoisomerase (ATP-hydrolyzing) subunit B [Rhodococcus rhodochrous]	Rhodococcus rhodochrous KG-21/Rhodococcus rhodochrous	0	677	677	1	677	1	677	677	1	1	1	1	0		WP_054370848;WP_054370848	1300	gyrB	423618	AHZ45480
ENBDON_00008	DNA topoisomerase (ATP-hydrolyzing) subunit B	MAAQKSNKSNSDYGASSITVLEGLEAVRKRPGMYIGSTGERGLHHLIWEVVDNSVDEAMAGHATKVEVTLLEDGGVQVVDDGRGIPVGMHASGVPTVEVVLTQLHAGGKFDSDAYAVSGGLHGVGISVVNALSTQLQVEIDRDGYHWEQTYQSSKPGKLVKGEPTRATGTTVRFWADPDIFETTTYNFETVARRLQEMAFLNKGLTITLTDERVAPEEVTDEVVSELAEAPKKAEEQEQAEIEQQHKVKVRVYHYPGGLEDYVRHINRTKQPIHNSVVGFTAKGTGHELEVAMQWNSGYSESVHTFANTINTHEGGTHEEGFRAALTSVVNKYAKDKKLLKDKDPNLTGDDIREGLAAIISVKVGEPQFEGQTKTKLGNTEVKSFVQKACNEHLSHWLE…	677	20	0	0.9677	/data/input/nr_20241120.dmnd																			KOS58088.1 DNA gyrase subunit B [Rhodococcus rhodochrous KG-21]/DNA topoisomerase (ATP-hydrolyzing) subunit B [Rhodococcus rhodochrous]	Rhodococcus rhodochrous KG-21/Rhodococcus rhodochrous	0	677	677	1	677	1	677	677	1	1	1	1	0		WP_054370848;WP_054370848	1300	gyrB	1278076	WP_003936639
ENBDON_00008	DNA topoisomerase (ATP-hydrolyzing) subunit B	MAAQKSNKSNSDYGASSITVLEGLEAVRKRPGMYIGSTGERGLHHLIWEVVDNSVDEAMAGHATKVEVTLLEDGGVQVVDDGRGIPVGMHASGVPTVEVVLTQLHAGGKFDSDAYAVSGGLHGVGISVVNALSTQLQVEIDRDGYHWEQTYQSSKPGKLVKGEPTRATGTTVRFWADPDIFETTTYNFETVARRLQEMAFLNKGLTITLTDERVAPEEVTDEVVSELAEAPKKAEEQEQAEIEQQHKVKVRVYHYPGGLEDYVRHINRTKQPIHNSVVGFTAKGTGHELEVAMQWNSGYSESVHTFANTINTHEGGTHEEGFRAALTSVVNKYAKDKKLLKDKDPNLTGDDIREGLAAIISVKVGEPQFEGQTKTKLGNTEVKSFVQKACNEHLSHWLE…	677	20	0	0.9677	/data/input/nr_20241120.dmnd																			KOS58088.1 DNA gyrase subunit B [Rhodococcus rhodochrous KG-21]/DNA topoisomerase (ATP-hydrolyzing) subunit B [Rhodococcus rhodochrous]	Rhodococcus rhodochrous KG-21/Rhodococcus rhodochrous	0	677	677	1	677	1	677	677	1	1	1	1	0		WP_054370848;WP_054370848	1300	gyrB	191292	WP_006934474
ENBDON_00009	MULTISPECIES: roadblock/LC7 domain-containing protein	MNIDHGSDVTRPLDWLVSNFAREVPGVSHAVLVSADGLLMAASAHLPVDRAEQLAAVTSGLASLSNGVSQLFEGGGVLQSVVEMQHGYLLLMSVGDGSHLAALTASECDIGQVGYEMALLVDRVGASVEATPRIGLGS	138	20	2.8e-88	0.9712	/data/input/nr_20241120.dmnd	MULTISPECIES: roadblock/LC7 domain-containing protein [Rhodococcus]/MDO2379401.1 roadblock/LC7 domain-containing protein [Rhodococcus ruber]/RIK10850.1 MAG: dynein regulation protein LC7 [Acidobacteriota bacterium]/ATQ30118.1 dynein regulation protein LC7 [Rhodococcus ruber]/AUM19139.1 dynein regulation protein LC7 [Rhodococcus ruber]/AWG97093.1 dynein regulation protein LC7 [Rhodococcus ruber]	Rhodococcus/Rhodococcus ruber/Acidobacteriota bacterium/Rhodococcus ruber/Rhodococcus ruber/Rhodococcus ruber	2.8e-88	138	138	1	138	1	138	138	1	1	1	1	0		WP_003936637/WP_003936637/WP_003936637	263	ATQ30118.1 dynein regulation protein LC7 [Rhodococcus ruber]/RIK10850.1 MAG: dynein regulation protein LC7 [Acidobacteriota bacterium]/AWG97093.1 dynein regulation protein LC7 [Rhodococcus ruber]/MULTISPECIES: roadblock/LC7 domain-containing protein [Rhodococcus]/MDO2379401.1 roadblock/LC7 domain-containing protein [Rhodococcus ruber]/AUM19139.1 dynein regulation protein LC7 [Rhodococcus ruber]	Rhodococcus ruber/Rhodococcus/Acidobacteriota bacterium	2.8e-88	138	138	1	138	1	138	138	1	1	1	1	0		WP_003936637;WP_003936637;WP_003936637	263
ENBDON_00009	MULTISPECIES: roadblock/LC7 domain-containing protein	MNIDHGSDVTRPLDWLVSNFAREVPGVSHAVLVSADGLLMAASAHLPVDRAEQLAAVTSGLASLSNGVSQLFEGGGVLQSVVEMQHGYLLLMSVGDGSHLAALTASECDIGQVGYEMALLVDRVGASVEATPRIGLGS	138	20	2.8e-88	0.9712	/data/input/nr_20241120.dmnd	MULTISPECIES: roadblock/LC7 domain-containing protein [Rhodococcus]/ETT26600.1 Roadblock/LC7 family protein [Rhodococcus rhodochrous ATCC 21198]/NCL77101.1 Serine protease inhibitor [Rhodococcus sp. YH1]/OOL29691.1 dynein regulation protein LC7 [Rhodococcus rhodochrous]/AKE87888.1 dynein regulation protein LC7 [Rhodococcus aetherivorans]/ANZ27474.1 dynein regulation protein LC7 [Rhodococcus sp. W…	Rhodococcus/Rhodococcus rhodochrous ATCC 21198/Rhodococcus sp. YH1/Rhodococcus rhodochrous/Rhodococcus aetherivorans/Rhodococcus sp. WB1	1.2e-87	138	138	1	138	1	138	137	0.9928	1	1	1	0		WP_006934478/WP_006934478/WP_006934478/WP_006934478/WP_006934478/WP_006934478	262	ATQ30118.1 dynein regulation protein LC7 [Rhodococcus ruber]/RIK10850.1 MAG: dynein regulation protein LC7 [Acidobacteriota bacterium]/AWG97093.1 dynein regulation protein LC7 [Rhodococcus ruber]/MULTISPECIES: roadblock/LC7 domain-containing protein [Rhodococcus]/MDO2379401.1 roadblock/LC7 domain-containing protein [Rhodococcus ruber]/AUM19139.1 dynein regulation protein LC7 [Rhodococcus ruber]	Rhodococcus ruber/Rhodococcus/Acidobacteriota bacterium	2.8e-88	138	138	1	138	1	138	138	1	1	1	1	0		WP_003936637;WP_003936637;WP_003936637	263
ENBDON_00009	MULTISPECIES: roadblock/LC7 domain-containing protein	MNIDHGSDVTRPLDWLVSNFAREVPGVSHAVLVSADGLLMAASAHLPVDRAEQLAAVTSGLASLSNGVSQLFEGGGVLQSVVEMQHGYLLLMSVGDGSHLAALTASECDIGQVGYEMALLVDRVGASVEATPRIGLGS	138	20	2.8e-88	0.9712	/data/input/nr_20241120.dmnd	MULTISPECIES: roadblock/LC7 domain-containing protein [unclassified Rhodococcus (in: high G+C Gram-positive bacteria)]/MCK0091459.1 roadblock/LC7 domain-containing protein [Rhodococcus sp. F64268]/NLU63670.1 dynein regulation protein LC7 [Rhodococcus sp. HNM0563]	unclassified Rhodococcus (in: high G+C Gram-positive bacteria)/Rhodococcus sp. F64268/Rhodococcus sp. HNM0563	6.7e-87	138	138	1	138	1	138	137	0.9928	1	1	1	0		WP_054805599/WP_054805599/WP_054805599	260	ATQ30118.1 dynein regulation protein LC7 [Rhodococcus ruber]/RIK10850.1 MAG: dynein regulation protein LC7 [Acidobacteriota bacterium]/AWG97093.1 dynein regulation protein LC7 [Rhodococcus ruber]/MULTISPECIES: roadblock/LC7 domain-containing protein [Rhodococcus]/MDO2379401.1 roadblock/LC7 domain-containing protein [Rhodococcus ruber]/AUM19139.1 dynein regulation protein LC7 [Rhodococcus ruber]	Rhodococcus ruber/Rhodococcus/Acidobacteriota bacterium	2.8e-88	138	138	1	138	1	138	138	1	1	1	1	0		WP_003936637;WP_003936637;WP_003936637	263
ENBDON_00009	MULTISPECIES: roadblock/LC7 domain-containing protein	MNIDHGSDVTRPLDWLVSNFAREVPGVSHAVLVSADGLLMAASAHLPVDRAEQLAAVTSGLASLSNGVSQLFEGGGVLQSVVEMQHGYLLLMSVGDGSHLAALTASECDIGQVGYEMALLVDRVGASVEATPRIGLGS	138	20	2.8e-88	0.9712	/data/input/nr_20241120.dmnd	MULTISPECIES: roadblock/LC7 domain-containing protein [Rhodococcus]/MBH0123306.1 roadblock/LC7 domain-containing protein [Rhodococcus sp. CX]/MCK8672163.1 roadblock/LC7 domain-containing protein [Rhodococcus sp. HM1]	Rhodococcus/Rhodococcus sp. CX/Rhodococcus sp. HM1	9.5e-87	138	138	1	138	1	138	137	0.9928	1	1	1	0		WP_068159208/WP_068159208/WP_068159208	259	ATQ30118.1 dynein regulation protein LC7 [Rhodococcus ruber]/RIK10850.1 MAG: dynein regulation protein LC7 [Acidobacteriota bacterium]/AWG97093.1 dynein regulation protein LC7 [Rhodococcus ruber]/MULTISPECIES: roadblock/LC7 domain-containing protein [Rhodococcus]/MDO2379401.1 roadblock/LC7 domain-containing protein [Rhodococcus ruber]/AUM19139.1 dynein regulation protein LC7 [Rhodococcus ruber]	Rhodococcus ruber/Rhodococcus/Acidobacteriota bacterium	2.8e-88	138	138	1	138	1	138	138	1	1	1	1	0		WP_003936637;WP_003936637;WP_003936637	263
ENBDON_00009	MULTISPECIES: roadblock/LC7 domain-containing protein	MNIDHGSDVTRPLDWLVSNFAREVPGVSHAVLVSADGLLMAASAHLPVDRAEQLAAVTSGLASLSNGVSQLFEGGGVLQSVVEMQHGYLLLMSVGDGSHLAALTASECDIGQVGYEMALLVDRVGASVEATPRIGLGS	138	20	2.8e-88	0.9712	/data/input/nr_20241120.dmnd	roadblock/LC7 domain-containing protein [Rhodococcus sp. 11-3]/USC15410.1 roadblock/LC7 domain-containing protein [Rhodococcus sp. 11-3]	Rhodococcus sp. 11-3/Rhodococcus sp. 11-3	9.5e-87	138	138	1	138	1	138	137	0.9928	1	1	1	0		WP_251549974	259	ATQ30118.1 dynein regulation protein LC7 [Rhodococcus ruber]/RIK10850.1 MAG: dynein regulation protein LC7 [Acidobacteriota bacterium]/AWG97093.1 dynein regulation protein LC7 [Rhodococcus ruber]/MULTISPECIES: roadblock/LC7 domain-containing protein [Rhodococcus]/MDO2379401.1 roadblock/LC7 domain-containing protein [Rhodococcus ruber]/AUM19139.1 dynein regulation protein LC7 [Rhodococcus ruber]	Rhodococcus ruber/Rhodococcus/Acidobacteriota bacterium	2.8e-88	138	138	1	138	1	138	138	1	1	1	1	0		WP_003936637;WP_003936637;WP_003936637	263
ENBDON_00009	MULTISPECIES: roadblock/LC7 domain-containing protein	MNIDHGSDVTRPLDWLVSNFAREVPGVSHAVLVSADGLLMAASAHLPVDRAEQLAAVTSGLASLSNGVSQLFEGGGVLQSVVEMQHGYLLLMSVGDGSHLAALTASECDIGQVGYEMALLVDRVGASVEATPRIGLGS	138	20	2.8e-88	0.9712	/data/input/nr_20241120.dmnd	roadblock/LC7 domain-containing protein [Rhodococcus sp. CC-R104]/MEE2031752.1 roadblock/LC7 domain-containing protein [Rhodococcus sp. CC-R104]	Rhodococcus sp. CC-R104/Rhodococcus sp. CC-R104	1.3e-86	138	138	1	138	1	138	137	0.9928	1	1	1	0		WP_330151186	259	ATQ30118.1 dynein regulation protein LC7 [Rhodococcus ruber]/RIK10850.1 MAG: dynein regulation protein LC7 [Acidobacteriota bacterium]/AWG97093.1 dynein regulation protein LC7 [Rhodococcus ruber]/MULTISPECIES: roadblock/LC7 domain-containing protein [Rhodococcus]/MDO2379401.1 roadblock/LC7 domain-containing protein [Rhodococcus ruber]/AUM19139.1 dynein regulation protein LC7 [Rhodococcus ruber]	Rhodococcus ruber/Rhodococcus/Acidobacteriota bacterium	2.8e-88	138	138	1	138	1	138	138	1	1	1	1	0		WP_003936637;WP_003936637;WP_003936637	263
ENBDON_00009	MULTISPECIES: roadblock/LC7 domain-containing protein	MNIDHGSDVTRPLDWLVSNFAREVPGVSHAVLVSADGLLMAASAHLPVDRAEQLAAVTSGLASLSNGVSQLFEGGGVLQSVVEMQHGYLLLMSVGDGSHLAALTASECDIGQVGYEMALLVDRVGASVEATPRIGLGS	138	20	2.8e-88	0.9712	/data/input/nr_20241120.dmnd	roadblock/LC7 domain-containing protein [Rhodococcus zopfii]/MDV2477854.1 dynein regulation protein LC7 [Rhodococcus zopfii]	Rhodococcus zopfii/Rhodococcus zopfii	2.7e-86	138	138	1	138	1	138	137	0.9928	1	1	1	0		WP_072808920	258	ATQ30118.1 dynein regulation protein LC7 [Rhodococcus ruber]/RIK10850.1 MAG: dynein regulation protein LC7 [Acidobacteriota bacterium]/AWG97093.1 dynein regulation protein LC7 [Rhodococcus ruber]/MULTISPECIES: roadblock/LC7 domain-containing protein [Rhodococcus]/MDO2379401.1 roadblock/LC7 domain-containing protein [Rhodococcus ruber]/AUM19139.1 dynein regulation protein LC7 [Rhodococcus ruber]	Rhodococcus ruber/Rhodococcus/Acidobacteriota bacterium	2.8e-88	138	138	1	138	1	138	138	1	1	1	1	0		WP_003936637;WP_003936637;WP_003936637	263
ENBDON_00009	MULTISPECIES: roadblock/LC7 domain-containing protein	MNIDHGSDVTRPLDWLVSNFAREVPGVSHAVLVSADGLLMAASAHLPVDRAEQLAAVTSGLASLSNGVSQLFEGGGVLQSVVEMQHGYLLLMSVGDGSHLAALTASECDIGQVGYEMALLVDRVGASVEATPRIGLGS	138	20	2.8e-88	0.9712	/data/input/nr_20241120.dmnd	MULTISPECIES: roadblock/LC7 domain-containing protein [Rhodococcus]/HLT11717.1 roadblock/LC7 domain-containing protein [Micromonosporaceae bacterium]/AHD22138.1 dynein regulation protein LC7 [Rhodococcus pyridinivorans SB3094]/AOD21302.1 dynein regulation protein LC7 [Rhodococcus sp. p52]/APE11225.1 dynein regulation protein LC7 [Rhodococcus sp. 2G]/AWZ23276.1 dynein regulation protein LC7 [Rhodo…	Rhodococcus/Micromonosporaceae bacterium/Rhodococcus pyridinivorans SB3094/Rhodococcus sp. p52/Rhodococcus sp. 2G/Rhodococcus pyridinivorans	2.7e-86	138	138	1	138	1	138	136	0.9855	1	1	1	0		WP_006550917/WP_006550917/WP_006550917/WP_006550917/WP_006550917/WP_006550917	258	ATQ30118.1 dynein regulation protein LC7 [Rhodococcus ruber]/RIK10850.1 MAG: dynein regulation protein LC7 [Acidobacteriota bacterium]/AWG97093.1 dynein regulation protein LC7 [Rhodococcus ruber]/MULTISPECIES: roadblock/LC7 domain-containing protein [Rhodococcus]/MDO2379401.1 roadblock/LC7 domain-containing protein [Rhodococcus ruber]/AUM19139.1 dynein regulation protein LC7 [Rhodococcus ruber]	Rhodococcus ruber/Rhodococcus/Acidobacteriota bacterium	2.8e-88	138	138	1	138	1	138	138	1	1	1	1	0		WP_003936637;WP_003936637;WP_003936637	263
ENBDON_00009	MULTISPECIES: roadblock/LC7 domain-containing protein	MNIDHGSDVTRPLDWLVSNFAREVPGVSHAVLVSADGLLMAASAHLPVDRAEQLAAVTSGLASLSNGVSQLFEGGGVLQSVVEMQHGYLLLMSVGDGSHLAALTASECDIGQVGYEMALLVDRVGASVEATPRIGLGS	138	20	2.8e-88	0.9712	/data/input/nr_20241120.dmnd	MULTISPECIES: roadblock/LC7 domain-containing protein [Rhodococcus]/MBF0663421.1 roadblock/LC7 domain-containing protein [Rhodococcus sp. (in: high G+C Gram-positive bacteria)]/MBM7458814.1 putative regulator of Ras-like GTPase activity (Roadblock/LC7/MglB family) [Rhodococcus coprophilus]/NMD95615.1 dynein regulation protein LC7 [Rhodococcus sp. BL-253-APC-6A1W]/NME79611.1 dynein regulation prot…	Rhodococcus/Rhodococcus sp. (in: high G+C Gram-positive bacteria)/Rhodococcus coprophilus/Rhodococcus sp. BL-253-APC-6A1W/Rhodococcus sp. 105337/Rhodococcus coprophilus	5.5e-86	138	138	1	138	1	138	136	0.9855	1	1	1	0		WP_072701130/WP_072701130/WP_072701130/WP_072701130/WP_072701130	258	ATQ30118.1 dynein regulation protein LC7 [Rhodococcus ruber]/RIK10850.1 MAG: dynein regulation protein LC7 [Acidobacteriota bacterium]/AWG97093.1 dynein regulation protein LC7 [Rhodococcus ruber]/MULTISPECIES: roadblock/LC7 domain-containing protein [Rhodococcus]/MDO2379401.1 roadblock/LC7 domain-containing protein [Rhodococcus ruber]/AUM19139.1 dynein regulation protein LC7 [Rhodococcus ruber]	Rhodococcus ruber/Rhodococcus/Acidobacteriota bacterium	2.8e-88	138	138	1	138	1	138	138	1	1	1	1	0		WP_003936637;WP_003936637;WP_003936637	263
ENBDON_00009	MULTISPECIES: roadblock/LC7 domain-containing protein	MNIDHGSDVTRPLDWLVSNFAREVPGVSHAVLVSADGLLMAASAHLPVDRAEQLAAVTSGLASLSNGVSQLFEGGGVLQSVVEMQHGYLLLMSVGDGSHLAALTASECDIGQVGYEMALLVDRVGASVEATPRIGLGS	138	20	2.8e-88	0.9712	/data/input/nr_20241120.dmnd	MULTISPECIES: roadblock/LC7 domain-containing protein [Rhodococcus]/MEE2057912.1 roadblock/LC7 domain-containing protein [Rhodococcus artemisiae]/TCN48108.1 hypothetical protein EV641_11829 [Rhodococcus sp. SMB37]	Rhodococcus/Rhodococcus artemisiae/Rhodococcus sp. SMB37	9.1e-85	138	135	1	135	1	135	134	0.9926	0.9783	0.9783	1	0		WP_132475123/WP_132475123/WP_132475123	254	ATQ30118.1 dynein regulation protein LC7 [Rhodococcus ruber]/RIK10850.1 MAG: dynein regulation protein LC7 [Acidobacteriota bacterium]/AWG97093.1 dynein regulation protein LC7 [Rhodococcus ruber]/MULTISPECIES: roadblock/LC7 domain-containing protein [Rhodococcus]/MDO2379401.1 roadblock/LC7 domain-containing protein [Rhodococcus ruber]/AUM19139.1 dynein regulation protein LC7 [Rhodococcus ruber]	Rhodococcus ruber/Rhodococcus/Acidobacteriota bacterium	2.8e-88	138	138	1	138	1	138	138	1	1	1	1	0		WP_003936637;WP_003936637;WP_003936637	263
ENBDON_00009	MULTISPECIES: roadblock/LC7 domain-containing protein	MNIDHGSDVTRPLDWLVSNFAREVPGVSHAVLVSADGLLMAASAHLPVDRAEQLAAVTSGLASLSNGVSQLFEGGGVLQSVVEMQHGYLLLMSVGDGSHLAALTASECDIGQVGYEMALLVDRVGASVEATPRIGLGS	138	20	2.8e-88	0.9712	/data/input/nr_20241120.dmnd	roadblock/LC7 domain-containing protein [Rhodococcus sp. Z13]/UYP19030.1 roadblock/LC7 domain-containing protein [Rhodococcus sp. Z13]	Rhodococcus sp. Z13/Rhodococcus sp. Z13	1.8e-84	138	138	1	138	1	138	136	0.9855	1	1	1	0		WP_264152699	254	ATQ30118.1 dynein regulation protein LC7 [Rhodococcus ruber]/RIK10850.1 MAG: dynein regulation protein LC7 [Acidobacteriota bacterium]/AWG97093.1 dynein regulation protein LC7 [Rhodococcus ruber]/MULTISPECIES: roadblock/LC7 domain-containing protein [Rhodococcus]/MDO2379401.1 roadblock/LC7 domain-containing protein [Rhodococcus ruber]/AUM19139.1 dynein regulation protein LC7 [Rhodococcus ruber]	Rhodococcus ruber/Rhodococcus/Acidobacteriota bacterium	2.8e-88	138	138	1	138	1	138	138	1	1	1	1	0		WP_003936637;WP_003936637;WP_003936637	263
ENBDON_00009	MULTISPECIES: roadblock/LC7 domain-containing protein	MNIDHGSDVTRPLDWLVSNFAREVPGVSHAVLVSADGLLMAASAHLPVDRAEQLAAVTSGLASLSNGVSQLFEGGGVLQSVVEMQHGYLLLMSVGDGSHLAALTASECDIGQVGYEMALLVDRVGASVEATPRIGLGS	138	20	2.8e-88	0.9712	/data/input/nr_20241120.dmnd	putative regulator of Ras-like GTPase activity (Roadblock/LC7/MglB family) [Rhodococcus ruber]	Rhodococcus ruber	4.5e-81	130	130	1	130	9	138	130	1	1	0.942	1	0		MBP2214174	245	ATQ30118.1 dynein regulation protein LC7 [Rhodococcus ruber]/RIK10850.1 MAG: dynein regulation protein LC7 [Acidobacteriota bacterium]/AWG97093.1 dynein regulation protein LC7 [Rhodococcus ruber]/MULTISPECIES: roadblock/LC7 domain-containing protein [Rhodococcus]/MDO2379401.1 roadblock/LC7 domain-containing protein [Rhodococcus ruber]/AUM19139.1 dynein regulation protein LC7 [Rhodococcus ruber]	Rhodococcus ruber/Rhodococcus/Acidobacteriota bacterium	2.8e-88	138	138	1	138	1	138	138	1	1	1	1	0		WP_003936637;WP_003936637;WP_003936637	263
ENBDON_00009	MULTISPECIES: roadblock/LC7 domain-containing protein	MNIDHGSDVTRPLDWLVSNFAREVPGVSHAVLVSADGLLMAASAHLPVDRAEQLAAVTSGLASLSNGVSQLFEGGGVLQSVVEMQHGYLLLMSVGDGSHLAALTASECDIGQVGYEMALLVDRVGASVEATPRIGLGS	138	20	2.8e-88	0.9712	/data/input/nr_20241120.dmnd	roadblock/LC7 domain-containing protein [Rhodococcus sp. FXJ9.536]/MCQ4119523.1 roadblock/LC7 domain-containing protein [Rhodococcus sp. FXJ9.536]	Rhodococcus sp. FXJ9.536/Rhodococcus sp. FXJ9.536	9.4e-78	138	137	1	137	1	137	129	0.9416	0.9928	0.9928	1	0		WP_255967848	237	ATQ30118.1 dynein regulation protein LC7 [Rhodococcus ruber]/RIK10850.1 MAG: dynein regulation protein LC7 [Acidobacteriota bacterium]/AWG97093.1 dynein regulation protein LC7 [Rhodococcus ruber]/MULTISPECIES: roadblock/LC7 domain-containing protein [Rhodococcus]/MDO2379401.1 roadblock/LC7 domain-containing protein [Rhodococcus ruber]/AUM19139.1 dynein regulation protein LC7 [Rhodococcus ruber]	Rhodococcus ruber/Rhodococcus/Acidobacteriota bacterium	2.8e-88	138	138	1	138	1	138	138	1	1	1	1	0		WP_003936637;WP_003936637;WP_003936637	263
ENBDON_00009	MULTISPECIES: roadblock/LC7 domain-containing protein	MNIDHGSDVTRPLDWLVSNFAREVPGVSHAVLVSADGLLMAASAHLPVDRAEQLAAVTSGLASLSNGVSQLFEGGGVLQSVVEMQHGYLLLMSVGDGSHLAALTASECDIGQVGYEMALLVDRVGASVEATPRIGLGS	138	20	2.8e-88	0.9712	/data/input/nr_20241120.dmnd	MULTISPECIES: roadblock/LC7 domain-containing protein [Rhodococcus]/MDV7356353.1 roadblock/LC7 domain-containing protein [Rhodococcus oxybenzonivorans]/QHE66548.1 Roadblock/LC7 domain protein [Rhodococcus sp. WAY2]	Rhodococcus/Rhodococcus oxybenzonivorans/Rhodococcus sp. WAY2	2.7e-77	138	137	1	137	1	137	128	0.9343	0.9928	0.9928	1	0		WP_159918451/WP_159918451/WP_159918451	236	ATQ30118.1 dynein regulation protein LC7 [Rhodococcus ruber]/RIK10850.1 MAG: dynein regulation protein LC7 [Acidobacteriota bacterium]/AWG97093.1 dynein regulation protein LC7 [Rhodococcus ruber]/MULTISPECIES: roadblock/LC7 domain-containing protein [Rhodococcus]/MDO2379401.1 roadblock/LC7 domain-containing protein [Rhodococcus ruber]/AUM19139.1 dynein regulation protein LC7 [Rhodococcus ruber]	Rhodococcus ruber/Rhodococcus/Acidobacteriota bacterium	2.8e-88	138	138	1	138	1	138	138	1	1	1	1	0		WP_003936637;WP_003936637;WP_003936637	263
ENBDON_00009	MULTISPECIES: roadblock/LC7 domain-containing protein	MNIDHGSDVTRPLDWLVSNFAREVPGVSHAVLVSADGLLMAASAHLPVDRAEQLAAVTSGLASLSNGVSQLFEGGGVLQSVVEMQHGYLLLMSVGDGSHLAALTASECDIGQVGYEMALLVDRVGASVEATPRIGLGS	138	20	2.8e-88	0.9712	/data/input/nr_20241120.dmnd	MULTISPECIES: roadblock/LC7 domain-containing protein [Rhodococcus]/AWK70207.1 dynein regulation protein LC7 [Rhodococcus oxybenzonivorans]/MDV7246061.1 roadblock/LC7 domain-containing protein [Rhodococcus oxybenzonivorans]/MDV7268252.1 roadblock/LC7 domain-containing protein [Rhodococcus oxybenzonivorans]/MDV7277656.1 roadblock/LC7 domain-containing protein [Rhodococcus oxybenzonivorans]/MDV7337…	Rhodococcus/Rhodococcus oxybenzonivorans/Rhodococcus oxybenzonivorans/Rhodococcus oxybenzonivorans/Rhodococcus oxybenzonivorans/Rhodococcus oxybenzonivorans	3.8e-77	138	137	1	137	1	137	128	0.9343	0.9928	0.9928	1	0		WP_109325319/WP_109325319	235	ATQ30118.1 dynein regulation protein LC7 [Rhodococcus ruber]/RIK10850.1 MAG: dynein regulation protein LC7 [Acidobacteriota bacterium]/AWG97093.1 dynein regulation protein LC7 [Rhodococcus ruber]/MULTISPECIES: roadblock/LC7 domain-containing protein [Rhodococcus]/MDO2379401.1 roadblock/LC7 domain-containing protein [Rhodococcus ruber]/AUM19139.1 dynein regulation protein LC7 [Rhodococcus ruber]	Rhodococcus ruber/Rhodococcus/Acidobacteriota bacterium	2.8e-88	138	138	1	138	1	138	138	1	1	1	1	0		WP_003936637;WP_003936637;WP_003936637	263
ENBDON_00009	MULTISPECIES: roadblock/LC7 domain-containing protein	MNIDHGSDVTRPLDWLVSNFAREVPGVSHAVLVSADGLLMAASAHLPVDRAEQLAAVTSGLASLSNGVSQLFEGGGVLQSVVEMQHGYLLLMSVGDGSHLAALTASECDIGQVGYEMALLVDRVGASVEATPRIGLGS	138	20	2.8e-88	0.9712	/data/input/nr_20241120.dmnd	roadblock/LC7 domain-containing protein [Rhodococcus sp. USK13]	Rhodococcus sp. USK13	5.5e-77	138	137	1	137	1	137	128	0.9343	0.9928	0.9928	1	0		WP_213575423	235	ATQ30118.1 dynein regulation protein LC7 [Rhodococcus ruber]/RIK10850.1 MAG: dynein regulation protein LC7 [Acidobacteriota bacterium]/AWG97093.1 dynein regulation protein LC7 [Rhodococcus ruber]/MULTISPECIES: roadblock/LC7 domain-containing protein [Rhodococcus]/MDO2379401.1 roadblock/LC7 domain-containing protein [Rhodococcus ruber]/AUM19139.1 dynein regulation protein LC7 [Rhodococcus ruber]	Rhodococcus ruber/Rhodococcus/Acidobacteriota bacterium	2.8e-88	138	138	1	138	1	138	138	1	1	1	1	0		WP_003936637;WP_003936637;WP_003936637	263
ENBDON_00009	MULTISPECIES: roadblock/LC7 domain-containing protein	MNIDHGSDVTRPLDWLVSNFAREVPGVSHAVLVSADGLLMAASAHLPVDRAEQLAAVTSGLASLSNGVSQLFEGGGVLQSVVEMQHGYLLLMSVGDGSHLAALTASECDIGQVGYEMALLVDRVGASVEATPRIGLGS	138	20	2.8e-88	0.9712	/data/input/nr_20241120.dmnd	MULTISPECIES: roadblock/LC7 domain-containing protein [Rhodococcus]/ELB94678.1 hypothetical protein Rwratislav_02754 [Rhodococcus wratislaviensis IFP 2016]/KXF50548.1 dynein regulation protein LC7 [Rhodococcus sp. SC4]/NDV06998.1 dynein regulation protein LC7 [Rhodococcus sp. IEGM 248]/NHU43808.1 dynein regulation protein LC7 [Rhodococcus sp. A14]/TQC50336.1 dynein regulation protein LC7 [Rhodoco…	Rhodococcus/Rhodococcus wratislaviensis IFP 2016/Rhodococcus sp. SC4/Rhodococcus sp. IEGM 248/Rhodococcus sp. A14/Rhodococcus sp. WS4	1.8e-75	138	137	1	137	1	137	127	0.927	0.9928	0.9928	1	0		WP_005249096/WP_005249096/WP_005249096/WP_005249096/WP_005249096/WP_005249096	231	ATQ30118.1 dynein regulation protein LC7 [Rhodococcus ruber]/RIK10850.1 MAG: dynein regulation protein LC7 [Acidobacteriota bacterium]/AWG97093.1 dynein regulation protein LC7 [Rhodococcus ruber]/MULTISPECIES: roadblock/LC7 domain-containing protein [Rhodococcus]/MDO2379401.1 roadblock/LC7 domain-containing protein [Rhodococcus ruber]/AUM19139.1 dynein regulation protein LC7 [Rhodococcus ruber]	Rhodococcus ruber/Rhodococcus/Acidobacteriota bacterium	2.8e-88	138	138	1	138	1	138	138	1	1	1	1	0		WP_003936637;WP_003936637;WP_003936637	263
ENBDON_00009	MULTISPECIES: roadblock/LC7 domain-containing protein	MNIDHGSDVTRPLDWLVSNFAREVPGVSHAVLVSADGLLMAASAHLPVDRAEQLAAVTSGLASLSNGVSQLFEGGGVLQSVVEMQHGYLLLMSVGDGSHLAALTASECDIGQVGYEMALLVDRVGASVEATPRIGLGS	138	20	2.8e-88	0.9712	/data/input/nr_20241120.dmnd	dynein regulation protein LC7 [Rhodococcus opacus]	Rhodococcus opacus	7.4e-75	138	137	1	137	1	137	126	0.9197	0.9928	0.9928	1	0		MDT2004912	229	ATQ30118.1 dynein regulation protein LC7 [Rhodococcus ruber]/RIK10850.1 MAG: dynein regulation protein LC7 [Acidobacteriota bacterium]/AWG97093.1 dynein regulation protein LC7 [Rhodococcus ruber]/MULTISPECIES: roadblock/LC7 domain-containing protein [Rhodococcus]/MDO2379401.1 roadblock/LC7 domain-containing protein [Rhodococcus ruber]/AUM19139.1 dynein regulation protein LC7 [Rhodococcus ruber]	Rhodococcus ruber/Rhodococcus/Acidobacteriota bacterium	2.8e-88	138	138	1	138	1	138	138	1	1	1	1	0		WP_003936637;WP_003936637;WP_003936637	263
ENBDON_00009	MULTISPECIES: roadblock/LC7 domain-containing protein	MNIDHGSDVTRPLDWLVSNFAREVPGVSHAVLVSADGLLMAASAHLPVDRAEQLAAVTSGLASLSNGVSQLFEGGGVLQSVVEMQHGYLLLMSVGDGSHLAALTASECDIGQVGYEMALLVDRVGASVEATPRIGLGS	138	20	2.8e-88	0.9712	/data/input/nr_20241120.dmnd	roadblock/LC7 domain-containing protein [Corynebacteriales bacterium D3-21]	Corynebacteriales bacterium D3-21	1.5e-74	138	138	1	138	1	138	128	0.9275	1	1	1	0		MDG3016073	229	ATQ30118.1 dynein regulation protein LC7 [Rhodococcus ruber]/RIK10850.1 MAG: dynein regulation protein LC7 [Acidobacteriota bacterium]/AWG97093.1 dynein regulation protein LC7 [Rhodococcus ruber]/MULTISPECIES: roadblock/LC7 domain-containing protein [Rhodococcus]/MDO2379401.1 roadblock/LC7 domain-containing protein [Rhodococcus ruber]/AUM19139.1 dynein regulation protein LC7 [Rhodococcus ruber]	Rhodococcus ruber/Rhodococcus/Acidobacteriota bacterium	2.8e-88	138	138	1	138	1	138	138	1	1	1	1	0		WP_003936637;WP_003936637;WP_003936637	263
ENBDON_00009	MULTISPECIES: roadblock/LC7 domain-containing protein	MNIDHGSDVTRPLDWLVSNFAREVPGVSHAVLVSADGLLMAASAHLPVDRAEQLAAVTSGLASLSNGVSQLFEGGGVLQSVVEMQHGYLLLMSVGDGSHLAALTASECDIGQVGYEMALLVDRVGASVEATPRIGLGS	138	20	2.8e-88	0.9712	/data/input/nr_20241120.dmnd	hypothetical protein RDE2_00070 [Rhodococcus sp. RDE2]	Rhodococcus sp. RDE2	3.7e-74	123	123	1	123	16	138	123	1	1	0.8913	1	0		BDB58213	227	ATQ30118.1 dynein regulation protein LC7 [Rhodococcus ruber]/RIK10850.1 MAG: dynein regulation protein LC7 [Acidobacteriota bacterium]/AWG97093.1 dynein regulation protein LC7 [Rhodococcus ruber]/MULTISPECIES: roadblock/LC7 domain-containing protein [Rhodococcus]/MDO2379401.1 roadblock/LC7 domain-containing protein [Rhodococcus ruber]/AUM19139.1 dynein regulation protein LC7 [Rhodococcus ruber]	Rhodococcus ruber/Rhodococcus/Acidobacteriota bacterium	2.8e-88	138	138	1	138	1	138	138	1	1	1	1	0		WP_003936637;WP_003936637;WP_003936637	263
ENBDON_00010	MULTISPECIES: DUF742 domain-containing protein	MEERKAESPPAQPSLVRPYSLTSGRTSPAVELALEALIQVLPGTDDRARDLDNINATIVALCRESPSVAEIAARVGVPIGVARVLVADLVEAGHVRILATLKDDSSDAERRELIERVLSGLREL	124	20	6.2e-74	0.954	/data/input/nr_20241120.dmnd	MULTISPECIES: DUF742 domain-containing protein [Rhodococcus]/MDO2379402.1 DUF742 domain-containing protein [Rhodococcus ruber]/RIK10849.1 MAG: DUF742 domain-containing protein [Acidobacteriota bacterium]/ATQ30119.1 DUF742 domain-containing protein [Rhodococcus ruber]/AUM19140.1 DUF742 domain-containing protein [Rhodococcus ruber]/AWG97094.1 DUF742 domain-containing protein [Rhodococcus ruber]	Rhodococcus/Rhodococcus ruber/Acidobacteriota bacterium/Rhodococcus ruber/Rhodococcus ruber/Rhodococcus ruber	6.2e-74	124	124	1	124	1	124	124	1	1	1	1	0		WP_003936636/WP_003936636/WP_003936636	226	MULTISPECIES: DUF742 domain-containing protein [Rhodococcus]/MDO2379402.1 DUF742 domain-containing protein [Rhodococcus ruber]/RIK10849.1 MAG: DUF742 domain-containing protein [Acidobacteriota bacterium]/ATQ30119.1 DUF742 domain-containing protein [Rhodococcus ruber]/AUM19140.1 DUF742 domain-containing protein [Rhodococcus ruber]/AWG97094.1 DUF742 domain-containing protein [Rhodococcus ruber]	Rhodococcus ruber/Rhodococcus/Acidobacteriota bacterium	6.2e-74	124	124	1	124	1	124	124	1	1	1	1	0		WP_003936636;WP_003936636;WP_003936636	226
ENBDON_00010	MULTISPECIES: DUF742 domain-containing protein	MEERKAESPPAQPSLVRPYSLTSGRTSPAVELALEALIQVLPGTDDRARDLDNINATIVALCRESPSVAEIAARVGVPIGVARVLVADLVEAGHVRILATLKDDSSDAERRELIERVLSGLREL	124	20	6.2e-74	0.954	/data/input/nr_20241120.dmnd	DUF742 domain-containing protein [Rhodococcus indonesiensis]/MDM7489168.1 DUF742 domain-containing protein [Rhodococcus indonesiensis]	Rhodococcus indonesiensis/Rhodococcus indonesiensis	1.8e-73	124	124	1	124	1	124	124	1	1	1	1	0		WP_289379251	225	MULTISPECIES: DUF742 domain-containing protein [Rhodococcus]/MDO2379402.1 DUF742 domain-containing protein [Rhodococcus ruber]/RIK10849.1 MAG: DUF742 domain-containing protein [Acidobacteriota bacterium]/ATQ30119.1 DUF742 domain-containing protein [Rhodococcus ruber]/AUM19140.1 DUF742 domain-containing protein [Rhodococcus ruber]/AWG97094.1 DUF742 domain-containing protein [Rhodococcus ruber]	Rhodococcus ruber/Rhodococcus/Acidobacteriota bacterium	6.2e-74	124	124	1	124	1	124	124	1	1	1	1	0		WP_003936636;WP_003936636;WP_003936636	226
ENBDON_00010	MULTISPECIES: DUF742 domain-containing protein	MEERKAESPPAQPSLVRPYSLTSGRTSPAVELALEALIQVLPGTDDRARDLDNINATIVALCRESPSVAEIAARVGVPIGVARVLVADLVEAGHVRILATLKDDSSDAERRELIERVLSGLREL	124	20	6.2e-74	0.954	/data/input/nr_20241120.dmnd	MULTISPECIES: DUF742 domain-containing protein [Rhodococcus]/ETT26599.1 protein of unknown function DUF742 [Rhodococcus rhodochrous ATCC 21198]/NCL77100.1 hypothetical protein [Rhodococcus sp. YH1]/OOL29692.1 hypothetical protein GQ85_24405 [Rhodococcus rhodochrous]/AKE87889.1 hypothetical protein AAT18_00055 [Rhodococcus aetherivorans]/ANZ27473.1 hypothetical protein A4U64_24465 [Rhodococcus sp.…	Rhodococcus/Rhodococcus rhodochrous ATCC 21198/Rhodococcus sp. YH1/Rhodococcus rhodochrous/Rhodococcus aetherivorans/Rhodococcus sp. WB1	3.6e-73	124	124	1	124	1	124	123	0.9919	1	1	1	0		WP_006934479/WP_006934479/WP_006934479/WP_006934479/WP_006934479/WP_006934479	224	MULTISPECIES: DUF742 domain-containing protein [Rhodococcus]/MDO2379402.1 DUF742 domain-containing protein [Rhodococcus ruber]/RIK10849.1 MAG: DUF742 domain-containing protein [Acidobacteriota bacterium]/ATQ30119.1 DUF742 domain-containing protein [Rhodococcus ruber]/AUM19140.1 DUF742 domain-containing protein [Rhodococcus ruber]/AWG97094.1 DUF742 domain-containing protein [Rhodococcus ruber]	Rhodococcus ruber/Rhodococcus/Acidobacteriota bacterium	6.2e-74	124	124	1	124	1	124	124	1	1	1	1	0		WP_003936636;WP_003936636;WP_003936636	226
ENBDON_00010	MULTISPECIES: DUF742 domain-containing protein	MEERKAESPPAQPSLVRPYSLTSGRTSPAVELALEALIQVLPGTDDRARDLDNINATIVALCRESPSVAEIAARVGVPIGVARVLVADLVEAGHVRILATLKDDSSDAERRELIERVLSGLREL	124	20	6.2e-74	0.954	/data/input/nr_20241120.dmnd	DUF742 domain-containing protein, partial [Rhodococcus ruber]/MDI9967710.1 DUF742 domain-containing protein [Rhodococcus ruber]	Rhodococcus ruber/Rhodococcus ruber	6.7e-70	118	118	1	118	1	118	118	1	1	0.9516	1	0		WP_283338210	216	MULTISPECIES: DUF742 domain-containing protein [Rhodococcus]/MDO2379402.1 DUF742 domain-containing protein [Rhodococcus ruber]/RIK10849.1 MAG: DUF742 domain-containing protein [Acidobacteriota bacterium]/ATQ30119.1 DUF742 domain-containing protein [Rhodococcus ruber]/AUM19140.1 DUF742 domain-containing protein [Rhodococcus ruber]/AWG97094.1 DUF742 domain-containing protein [Rhodococcus ruber]	Rhodococcus ruber/Rhodococcus/Acidobacteriota bacterium	6.2e-74	124	124	1	124	1	124	124	1	1	1	1	0		WP_003936636;WP_003936636;WP_003936636	226
ENBDON_00010	MULTISPECIES: DUF742 domain-containing protein	MEERKAESPPAQPSLVRPYSLTSGRTSPAVELALEALIQVLPGTDDRARDLDNINATIVALCRESPSVAEIAARVGVPIGVARVLVADLVEAGHVRILATLKDDSSDAERRELIERVLSGLREL	124	20	6.2e-74	0.954	/data/input/nr_20241120.dmnd	DUF742 domain-containing protein [Rhodococcus sp. Z13]/UYP19031.1 DUF742 domain-containing protein [Rhodococcus sp. Z13]	Rhodococcus sp. Z13/Rhodococcus sp. Z13	4.5e-67	124	124	1	124	1	124	118	0.9516	1	1	1	0		WP_264152700	209	MULTISPECIES: DUF742 domain-containing protein [Rhodococcus]/MDO2379402.1 DUF742 domain-containing protein [Rhodococcus ruber]/RIK10849.1 MAG: DUF742 domain-containing protein [Acidobacteriota bacterium]/ATQ30119.1 DUF742 domain-containing protein [Rhodococcus ruber]/AUM19140.1 DUF742 domain-containing protein [Rhodococcus ruber]/AWG97094.1 DUF742 domain-containing protein [Rhodococcus ruber]	Rhodococcus ruber/Rhodococcus/Acidobacteriota bacterium	6.2e-74	124	124	1	124	1	124	124	1	1	1	1	0		WP_003936636;WP_003936636;WP_003936636	226
ENBDON_00010	MULTISPECIES: DUF742 domain-containing protein	MEERKAESPPAQPSLVRPYSLTSGRTSPAVELALEALIQVLPGTDDRARDLDNINATIVALCRESPSVAEIAARVGVPIGVARVLVADLVEAGHVRILATLKDDSSDAERRELIERVLSGLREL	124	20	6.2e-74	0.954	/data/input/nr_20241120.dmnd	MULTISPECIES: DUF742 domain-containing protein [Rhodococcus]/NLV79420.1 DUF742 domain-containing protein [Rhodococcus sp. (in: high G+C Gram-positive bacteria)]	Rhodococcus/Rhodococcus sp. (in: high G+C Gram-positive bacteria)	6.4e-67	124	124	1	124	1	124	118	0.9516	1	1	1	0		WP_068159286/WP_068159286	208	MULTISPECIES: DUF742 domain-containing protein [Rhodococcus]/MDO2379402.1 DUF742 domain-containing protein [Rhodococcus ruber]/RIK10849.1 MAG: DUF742 domain-containing protein [Acidobacteriota bacterium]/ATQ30119.1 DUF742 domain-containing protein [Rhodococcus ruber]/AUM19140.1 DUF742 domain-containing protein [Rhodococcus ruber]/AWG97094.1 DUF742 domain-containing protein [Rhodococcus ruber]	Rhodococcus ruber/Rhodococcus/Acidobacteriota bacterium	6.2e-74	124	124	1	124	1	124	124	1	1	1	1	0		WP_003936636;WP_003936636;WP_003936636	226
ENBDON_00010	MULTISPECIES: DUF742 domain-containing protein	MEERKAESPPAQPSLVRPYSLTSGRTSPAVELALEALIQVLPGTDDRARDLDNINATIVALCRESPSVAEIAARVGVPIGVARVLVADLVEAGHVRILATLKDDSSDAERRELIERVLSGLREL	124	20	6.2e-74	0.954	/data/input/nr_20241120.dmnd	MULTISPECIES: DUF742 domain-containing protein [Rhodococcus]/NLE78628.1 DUF742 domain-containing protein [Rhodococcus sp. (in: high G+C Gram-positive bacteria)]/HLT11716.1 DUF742 domain-containing protein [Micromonosporaceae bacterium]/AYA24542.1 DUF742 domain-containing protein [Rhodococcus rhodochrous]/MBF4480528.1 DUF742 domain-containing protein [Rhodococcus rhodochrous]/MCB8911469.1 DUF742 d…	Rhodococcus/Rhodococcus sp. (in: high G+C Gram-positive bacteria)/Micromonosporaceae bacterium/Rhodococcus rhodochrous/Rhodococcus rhodochrous/Rhodococcus rhodochrous	1.3e-66	124	124	1	124	1	124	118	0.9516	1	1	1	0		WP_085468661/WP_085468661/WP_085468661/WP_085468661	207	MULTISPECIES: DUF742 domain-containing protein [Rhodococcus]/MDO2379402.1 DUF742 domain-containing protein [Rhodococcus ruber]/RIK10849.1 MAG: DUF742 domain-containing protein [Acidobacteriota bacterium]/ATQ30119.1 DUF742 domain-containing protein [Rhodococcus ruber]/AUM19140.1 DUF742 domain-containing protein [Rhodococcus ruber]/AWG97094.1 DUF742 domain-containing protein [Rhodococcus ruber]	Rhodococcus ruber/Rhodococcus/Acidobacteriota bacterium	6.2e-74	124	124	1	124	1	124	124	1	1	1	1	0		WP_003936636;WP_003936636;WP_003936636	226
ENBDON_00010	MULTISPECIES: DUF742 domain-containing protein	MEERKAESPPAQPSLVRPYSLTSGRTSPAVELALEALIQVLPGTDDRARDLDNINATIVALCRESPSVAEIAARVGVPIGVARVLVADLVEAGHVRILATLKDDSSDAERRELIERVLSGLREL	124	20	6.2e-74	0.954	/data/input/nr_20241120.dmnd	MULTISPECIES: DUF742 domain-containing protein [Rhodococcus]/KLL96824.1 hypothetical protein NJ76_05950 [Rhodococcus sp. IITR03]/AHD22139.1 hypothetical protein Y013_16530 [Rhodococcus pyridinivorans SB3094]/AOD21303.1 hypothetical protein IM25_06420 [Rhodococcus sp. p52]/APE11226.1 hypothetical protein BO226_20160 [Rhodococcus sp. 2G]/AWZ23277.1 hypothetical protein CEJ39_02980 [Rhodococcus pyri…	Rhodococcus/Rhodococcus sp. IITR03/Rhodococcus pyridinivorans SB3094/Rhodococcus sp. p52/Rhodococcus sp. 2G/Rhodococcus pyridinivorans	1.9e-66	124	124	1	124	1	124	118	0.9516	1	1	1	0		WP_006550918/WP_006550918/WP_006550918/WP_006550918/WP_006550918/WP_006550918	207	MULTISPECIES: DUF742 domain-containing protein [Rhodococcus]/MDO2379402.1 DUF742 domain-containing protein [Rhodococcus ruber]/RIK10849.1 MAG: DUF742 domain-containing protein [Acidobacteriota bacterium]/ATQ30119.1 DUF742 domain-containing protein [Rhodococcus ruber]/AUM19140.1 DUF742 domain-containing protein [Rhodococcus ruber]/AWG97094.1 DUF742 domain-containing protein [Rhodococcus ruber]	Rhodococcus ruber/Rhodococcus/Acidobacteriota bacterium	6.2e-74	124	124	1	124	1	124	124	1	1	1	1	0		WP_003936636;WP_003936636;WP_003936636	226
ENBDON_00010	MULTISPECIES: DUF742 domain-containing protein	MEERKAESPPAQPSLVRPYSLTSGRTSPAVELALEALIQVLPGTDDRARDLDNINATIVALCRESPSVAEIAARVGVPIGVARVLVADLVEAGHVRILATLKDDSSDAERRELIERVLSGLREL	124	20	6.2e-74	0.954	/data/input/nr_20241120.dmnd	MULTISPECIES: DUF742 domain-containing protein [Rhodococcus]/MBH0123307.1 DUF742 domain-containing protein [Rhodococcus sp. CX]/MCK8672164.1 DUF742 domain-containing protein [Rhodococcus sp. HM1]/MDV2477853.1 DUF742 domain-containing protein [Rhodococcus zopfii]	Rhodococcus/Rhodococcus sp. CX/Rhodococcus sp. HM1/Rhodococcus zopfii	1.9e-66	124	124	1	124	1	124	118	0.9516	1	1	1	0		WP_072808921/WP_072808921/WP_072808921/WP_072808921	207	MULTISPECIES: DUF742 domain-containing protein [Rhodococcus]/MDO2379402.1 DUF742 domain-containing protein [Rhodococcus ruber]/RIK10849.1 MAG: DUF742 domain-containing protein [Acidobacteriota bacterium]/ATQ30119.1 DUF742 domain-containing protein [Rhodococcus ruber]/AUM19140.1 DUF742 domain-containing protein [Rhodococcus ruber]/AWG97094.1 DUF742 domain-containing protein [Rhodococcus ruber]	Rhodococcus ruber/Rhodococcus/Acidobacteriota bacterium	6.2e-74	124	124	1	124	1	124	124	1	1	1	1	0		WP_003936636;WP_003936636;WP_003936636	226
ENBDON_00010	MULTISPECIES: DUF742 domain-containing protein	MEERKAESPPAQPSLVRPYSLTSGRTSPAVELALEALIQVLPGTDDRARDLDNINATIVALCRESPSVAEIAARVGVPIGVARVLVADLVEAGHVRILATLKDDSSDAERRELIERVLSGLREL	124	20	6.2e-74	0.954	/data/input/nr_20241120.dmnd	MULTISPECIES: DUF742 domain-containing protein [Rhodococcus]/UTT48663.1 DUF742 domain-containing protein [Rhodococcus gordoniae]/SUE16058.1 Protein of uncharacterised function (DUF742) [Rhodococcus gordoniae]	Rhodococcus/Rhodococcus gordoniae/Rhodococcus gordoniae	5.3e-66	124	124	1	124	1	124	118	0.9516	1	1	1	0		WP_016931519/WP_016931519	206	MULTISPECIES: DUF742 domain-containing protein [Rhodococcus]/MDO2379402.1 DUF742 domain-containing protein [Rhodococcus ruber]/RIK10849.1 MAG: DUF742 domain-containing protein [Acidobacteriota bacterium]/ATQ30119.1 DUF742 domain-containing protein [Rhodococcus ruber]/AUM19140.1 DUF742 domain-containing protein [Rhodococcus ruber]/AWG97094.1 DUF742 domain-containing protein [Rhodococcus ruber]	Rhodococcus ruber/Rhodococcus/Acidobacteriota bacterium	6.2e-74	124	124	1	124	1	124	124	1	1	1	1	0		WP_003936636;WP_003936636;WP_003936636	226
ENBDON_00010	MULTISPECIES: DUF742 domain-containing protein	MEERKAESPPAQPSLVRPYSLTSGRTSPAVELALEALIQVLPGTDDRARDLDNINATIVALCRESPSVAEIAARVGVPIGVARVLVADLVEAGHVRILATLKDDSSDAERRELIERVLSGLREL	124	20	6.2e-74	0.954	/data/input/nr_20241120.dmnd	DUF742 domain-containing protein [Rhodococcus sp. F64268]/MCK0091458.1 DUF742 domain-containing protein [Rhodococcus sp. F64268]	Rhodococcus sp. F64268/Rhodococcus sp. F64268	1.1e-65	124	124	1	124	1	124	117	0.9435	1	1	1	0		WP_247273763	205	MULTISPECIES: DUF742 domain-containing protein [Rhodococcus]/MDO2379402.1 DUF742 domain-containing protein [Rhodococcus ruber]/RIK10849.1 MAG: DUF742 domain-containing protein [Acidobacteriota bacterium]/ATQ30119.1 DUF742 domain-containing protein [Rhodococcus ruber]/AUM19140.1 DUF742 domain-containing protein [Rhodococcus ruber]/AWG97094.1 DUF742 domain-containing protein [Rhodococcus ruber]	Rhodococcus ruber/Rhodococcus/Acidobacteriota bacterium	6.2e-74	124	124	1	124	1	124	124	1	1	1	1	0		WP_003936636;WP_003936636;WP_003936636	226
ENBDON_00010	MULTISPECIES: DUF742 domain-containing protein	MEERKAESPPAQPSLVRPYSLTSGRTSPAVELALEALIQVLPGTDDRARDLDNINATIVALCRESPSVAEIAARVGVPIGVARVLVADLVEAGHVRILATLKDDSSDAERRELIERVLSGLREL	124	20	6.2e-74	0.954	/data/input/nr_20241120.dmnd	MULTISPECIES: DUF742 domain-containing protein [Rhodococcus]/MBF0663422.1 DUF742 domain-containing protein [Rhodococcus sp. (in: high G+C Gram-positive bacteria)]/MBM7458813.1 hypothetical protein [Rhodococcus coprophilus]/NMD95614.1 DUF742 domain-containing protein [Rhodococcus sp. BL-253-APC-6A1W]/NME79610.1 DUF742 domain-containing protein [Rhodococcus sp. 105337]/SQI33573.1 Protein of unchara…	Rhodococcus/Rhodococcus sp. (in: high G+C Gram-positive bacteria)/Rhodococcus coprophilus/Rhodococcus sp. BL-253-APC-6A1W/Rhodococcus sp. 105337/Rhodococcus coprophilus	1.5e-65	124	124	1	124	1	124	117	0.9435	1	1	1	0		WP_072701132/WP_072701132/WP_072701132/WP_072701132/WP_072701132	205	MULTISPECIES: DUF742 domain-containing protein [Rhodococcus]/MDO2379402.1 DUF742 domain-containing protein [Rhodococcus ruber]/RIK10849.1 MAG: DUF742 domain-containing protein [Acidobacteriota bacterium]/ATQ30119.1 DUF742 domain-containing protein [Rhodococcus ruber]/AUM19140.1 DUF742 domain-containing protein [Rhodococcus ruber]/AWG97094.1 DUF742 domain-containing protein [Rhodococcus ruber]	Rhodococcus ruber/Rhodococcus/Acidobacteriota bacterium	6.2e-74	124	124	1	124	1	124	124	1	1	1	1	0		WP_003936636;WP_003936636;WP_003936636	226
ENBDON_00010	MULTISPECIES: DUF742 domain-containing protein	MEERKAESPPAQPSLVRPYSLTSGRTSPAVELALEALIQVLPGTDDRARDLDNINATIVALCRESPSVAEIAARVGVPIGVARVLVADLVEAGHVRILATLKDDSSDAERRELIERVLSGLREL	124	20	6.2e-74	0.954	/data/input/nr_20241120.dmnd	MULTISPECIES: DUF742 domain-containing protein [unclassified Rhodococcus (in: high G+C Gram-positive bacteria)]/NLU63671.1 DUF742 domain-containing protein [Rhodococcus sp. HNM0563]/TCN48109.1 uncharacterized protein DUF742 [Rhodococcus sp. SMB37]	unclassified Rhodococcus (in: high G+C Gram-positive bacteria)/Rhodococcus sp. HNM0563/Rhodococcus sp. SMB37	1.5e-65	124	124	1	124	1	124	117	0.9435	1	1	1	0		WP_054805600/WP_054805600/WP_054805600	205	MULTISPECIES: DUF742 domain-containing protein [Rhodococcus]/MDO2379402.1 DUF742 domain-containing protein [Rhodococcus ruber]/RIK10849.1 MAG: DUF742 domain-containing protein [Acidobacteriota bacterium]/ATQ30119.1 DUF742 domain-containing protein [Rhodococcus ruber]/AUM19140.1 DUF742 domain-containing protein [Rhodococcus ruber]/AWG97094.1 DUF742 domain-containing protein [Rhodococcus ruber]	Rhodococcus ruber/Rhodococcus/Acidobacteriota bacterium	6.2e-74	124	124	1	124	1	124	124	1	1	1	1	0		WP_003936636;WP_003936636;WP_003936636	226
ENBDON_00010	MULTISPECIES: DUF742 domain-containing protein	MEERKAESPPAQPSLVRPYSLTSGRTSPAVELALEALIQVLPGTDDRARDLDNINATIVALCRESPSVAEIAARVGVPIGVARVLVADLVEAGHVRILATLKDDSSDAERRELIERVLSGLREL	124	20	6.2e-74	0.954	/data/input/nr_20241120.dmnd	DUF742 domain-containing protein [Rhodococcus sp. CC-R104]/MEE2031753.1 DUF742 domain-containing protein [Rhodococcus sp. CC-R104]	Rhodococcus sp. CC-R104/Rhodococcus sp. CC-R104	3.1e-65	124	124	1	124	1	124	117	0.9435	1	1	1	0		WP_330151187	204	MULTISPECIES: DUF742 domain-containing protein [Rhodococcus]/MDO2379402.1 DUF742 domain-containing protein [Rhodococcus ruber]/RIK10849.1 MAG: DUF742 domain-containing protein [Acidobacteriota bacterium]/ATQ30119.1 DUF742 domain-containing protein [Rhodococcus ruber]/AUM19140.1 DUF742 domain-containing protein [Rhodococcus ruber]/AWG97094.1 DUF742 domain-containing protein [Rhodococcus ruber]	Rhodococcus ruber/Rhodococcus/Acidobacteriota bacterium	6.2e-74	124	124	1	124	1	124	124	1	1	1	1	0		WP_003936636;WP_003936636;WP_003936636	226
ENBDON_00010	MULTISPECIES: DUF742 domain-containing protein	MEERKAESPPAQPSLVRPYSLTSGRTSPAVELALEALIQVLPGTDDRARDLDNINATIVALCRESPSVAEIAARVGVPIGVARVLVADLVEAGHVRILATLKDDSSDAERRELIERVLSGLREL	124	20	6.2e-74	0.954	/data/input/nr_20241120.dmnd	DUF742 domain-containing protein [Rhodococcus artemisiae]/MEE2057913.1 DUF742 domain-containing protein [Rhodococcus artemisiae]	Rhodococcus artemisiae/Rhodococcus artemisiae	6.2e-65	124	124	1	124	1	124	117	0.9435	1	1	1	0		WP_330133159	203	MULTISPECIES: DUF742 domain-containing protein [Rhodococcus]/MDO2379402.1 DUF742 domain-containing protein [Rhodococcus ruber]/RIK10849.1 MAG: DUF742 domain-containing protein [Acidobacteriota bacterium]/ATQ30119.1 DUF742 domain-containing protein [Rhodococcus ruber]/AUM19140.1 DUF742 domain-containing protein [Rhodococcus ruber]/AWG97094.1 DUF742 domain-containing protein [Rhodococcus ruber]	Rhodococcus ruber/Rhodococcus/Acidobacteriota bacterium	6.2e-74	124	124	1	124	1	124	124	1	1	1	1	0		WP_003936636;WP_003936636;WP_003936636	226
ENBDON_00010	MULTISPECIES: DUF742 domain-containing protein	MEERKAESPPAQPSLVRPYSLTSGRTSPAVELALEALIQVLPGTDDRARDLDNINATIVALCRESPSVAEIAARVGVPIGVARVLVADLVEAGHVRILATLKDDSSDAERRELIERVLSGLREL	124	20	6.2e-74	0.954	/data/input/nr_20241120.dmnd	DUF742 domain-containing protein [Rhodococcus spelaei]/TQF74707.1 DUF742 domain-containing protein [Rhodococcus spelaei]	Rhodococcus spelaei/Rhodococcus spelaei	1.9e-52	124	112	13	124	13	124	102	0.9107	0.9032	0.9032	1	0		WP_142094791	172	MULTISPECIES: DUF742 domain-containing protein [Rhodococcus]/MDO2379402.1 DUF742 domain-containing protein [Rhodococcus ruber]/RIK10849.1 MAG: DUF742 domain-containing protein [Acidobacteriota bacterium]/ATQ30119.1 DUF742 domain-containing protein [Rhodococcus ruber]/AUM19140.1 DUF742 domain-containing protein [Rhodococcus ruber]/AWG97094.1 DUF742 domain-containing protein [Rhodococcus ruber]	Rhodococcus ruber/Rhodococcus/Acidobacteriota bacterium	6.2e-74	124	124	1	124	1	124	124	1	1	1	1	0		WP_003936636;WP_003936636;WP_003936636	226
ENBDON_00010	MULTISPECIES: DUF742 domain-containing protein	MEERKAESPPAQPSLVRPYSLTSGRTSPAVELALEALIQVLPGTDDRARDLDNINATIVALCRESPSVAEIAARVGVPIGVARVLVADLVEAGHVRILATLKDDSSDAERRELIERVLSGLREL	124	20	6.2e-74	0.954	/data/input/nr_20241120.dmnd	hypothetical protein GFS60_00013 [Rhodococcus sp. WAY2]	Rhodococcus sp. WAY2	7.4e-52	122	112	11	122	13	124	105	0.9375	0.918	0.9032	1	0		QHE66549	170	MULTISPECIES: DUF742 domain-containing protein [Rhodococcus]/MDO2379402.1 DUF742 domain-containing protein [Rhodococcus ruber]/RIK10849.1 MAG: DUF742 domain-containing protein [Acidobacteriota bacterium]/ATQ30119.1 DUF742 domain-containing protein [Rhodococcus ruber]/AUM19140.1 DUF742 domain-containing protein [Rhodococcus ruber]/AWG97094.1 DUF742 domain-containing protein [Rhodococcus ruber]	Rhodococcus ruber/Rhodococcus/Acidobacteriota bacterium	6.2e-74	124	124	1	124	1	124	124	1	1	1	1	0		WP_003936636;WP_003936636;WP_003936636	226
ENBDON_00010	MULTISPECIES: DUF742 domain-containing protein	MEERKAESPPAQPSLVRPYSLTSGRTSPAVELALEALIQVLPGTDDRARDLDNINATIVALCRESPSVAEIAARVGVPIGVARVLVADLVEAGHVRILATLKDDSSDAERRELIERVLSGLREL	124	20	6.2e-74	0.954	/data/input/nr_20241120.dmnd	MULTISPECIES: DUF742 domain-containing protein [Rhodococcus]/MDV7356352.1 DUF742 domain-containing protein [Rhodococcus oxybenzonivorans]	Rhodococcus/Rhodococcus oxybenzonivorans	7.9e-52	124	112	13	124	13	124	105	0.9375	0.9032	0.9032	1	0		WP_159918452/WP_159918452	170	MULTISPECIES: DUF742 domain-containing protein [Rhodococcus]/MDO2379402.1 DUF742 domain-containing protein [Rhodococcus ruber]/RIK10849.1 MAG: DUF742 domain-containing protein [Acidobacteriota bacterium]/ATQ30119.1 DUF742 domain-containing protein [Rhodococcus ruber]/AUM19140.1 DUF742 domain-containing protein [Rhodococcus ruber]/AWG97094.1 DUF742 domain-containing protein [Rhodococcus ruber]	Rhodococcus ruber/Rhodococcus/Acidobacteriota bacterium	6.2e-74	124	124	1	124	1	124	124	1	1	1	1	0		WP_003936636;WP_003936636;WP_003936636	226
ENBDON_00010	MULTISPECIES: DUF742 domain-containing protein	MEERKAESPPAQPSLVRPYSLTSGRTSPAVELALEALIQVLPGTDDRARDLDNINATIVALCRESPSVAEIAARVGVPIGVARVLVADLVEAGHVRILATLKDDSSDAERRELIERVLSGLREL	124	20	6.2e-74	0.954	/data/input/nr_20241120.dmnd	hypothetical protein W59_37458 [Rhodococcus opacus RKJ300 = JCM 13270]/EKT77871.1 hypothetical protein WSS_A35482 [Rhodococcus opacus M213]/ELB94677.1 hypothetical protein Rwratislav_02749 [Rhodococcus wratislaviensis IFP 2016]/MBA8961025.1 hypothetical protein [Rhodococcus opacus]/GAF46807.1 hypothetical protein RW1_033_01030 [Rhodococcus wratislaviensis NBRC 100605]	Rhodococcus opacus RKJ300 = JCM 13270/Rhodococcus opacus M213/Rhodococcus wratislaviensis IFP 2016/Rhodococcus opacus/Rhodococcus wratislaviensis NBRC 100605	1.1e-51	122	112	11	122	13	124	105	0.9375	0.918	0.9032	1	0		EID72510/EID72510/EID72510/EID72510/EID72510	170	MULTISPECIES: DUF742 domain-containing protein [Rhodococcus]/MDO2379402.1 DUF742 domain-containing protein [Rhodococcus ruber]/RIK10849.1 MAG: DUF742 domain-containing protein [Acidobacteriota bacterium]/ATQ30119.1 DUF742 domain-containing protein [Rhodococcus ruber]/AUM19140.1 DUF742 domain-containing protein [Rhodococcus ruber]/AWG97094.1 DUF742 domain-containing protein [Rhodococcus ruber]	Rhodococcus ruber/Rhodococcus/Acidobacteriota bacterium	6.2e-74	124	124	1	124	1	124	124	1	1	1	1	0		WP_003936636;WP_003936636;WP_003936636	226
ENBDON_00010	MULTISPECIES: DUF742 domain-containing protein	MEERKAESPPAQPSLVRPYSLTSGRTSPAVELALEALIQVLPGTDDRARDLDNINATIVALCRESPSVAEIAARVGVPIGVARVLVADLVEAGHVRILATLKDDSSDAERRELIERVLSGLREL	124	20	6.2e-74	0.954	/data/input/nr_20241120.dmnd	DUF742 domain-containing protein [Rhodococcus sp. WB9]/QDQ89443.1 DUF742 domain-containing protein [Rhodococcus sp. WB9]	Rhodococcus sp. WB9/Rhodococcus sp. WB9	1.1e-51	124	112	13	124	13	124	105	0.9375	0.9032	0.9032	1	0		WP_144284416	170	MULTISPECIES: DUF742 domain-containing protein [Rhodococcus]/MDO2379402.1 DUF742 domain-containing protein [Rhodococcus ruber]/RIK10849.1 MAG: DUF742 domain-containing protein [Acidobacteriota bacterium]/ATQ30119.1 DUF742 domain-containing protein [Rhodococcus ruber]/AUM19140.1 DUF742 domain-containing protein [Rhodococcus ruber]/AWG97094.1 DUF742 domain-containing protein [Rhodococcus ruber]	Rhodococcus ruber/Rhodococcus/Acidobacteriota bacterium	6.2e-74	124	124	1	124	1	124	124	1	1	1	1	0		WP_003936636;WP_003936636;WP_003936636	226
ENBDON_00011	conserved hypothetical protein	MDFANSNSPKRVTSTKIVIAGGFGVGKTTLVGAVSEIVPLRTEALVTNASDGVDNLSATPQKATTTVAMDFGRISLAEDLVLYLFGTPGQHRFWFMWDDLIRGAIGAIVLIDTRRLDESFAAVDFFEARNLPFIVAINEFDDAPRYPTEDIRQALAVSADVPIVSIDARDRESAKSALVTVTEYALRKLHQPVAP	195	20	1.9e-132	0.9797	/data/input/nr_20241120.dmnd	conserved hypothetical protein [Rhodococcus ruber]	Rhodococcus ruber	1.9e-132	195	195	1	195	1	195	195	1	1	1	1	0		CDZ89959	380	conserved hypothetical protein [Rhodococcus ruber]	Rhodococcus ruber	1.9e-132	195	195	1	195	1	195	195	1	1	1	1	0		CDZ89959	380	I0Q12_28980	2789880	WP_068159210		GO:0005525-IEA	GTP binding-IEA
ENBDON_00011	conserved hypothetical protein	MDFANSNSPKRVTSTKIVIAGGFGVGKTTLVGAVSEIVPLRTEALVTNASDGVDNLSATPQKATTTVAMDFGRISLAEDLVLYLFGTPGQHRFWFMWDDLIRGAIGAIVLIDTRRLDESFAAVDFFEARNLPFIVAINEFDDAPRYPTEDIRQALAVSADVPIVSIDARDRESAKSALVTVTEYALRKLHQPVAP	195	20	1.9e-132	0.9797	/data/input/nr_20241120.dmnd	protein of unknown function ATP binding protein [Rhodococcus rhodochrous ATCC 21198]/NCL77099.1 hypothetical protein [Rhodococcus sp. YH1]/GES40125.1 putative ATP/GTP-binding protein [Rhodococcus aetherivorans]	Rhodococcus rhodochrous ATCC 21198/Rhodococcus sp. YH1/Rhodococcus aetherivorans	1.5e-131	195	195	1	195	1	195	194	0.9949	1	1	1	0		ETT26598/ETT26598/ETT26598	377	conserved hypothetical protein [Rhodococcus ruber]	Rhodococcus ruber	1.9e-132	195	195	1	195	1	195	195	1	1	1	1	0		CDZ89959	380	KUM34_000045	1829	WP_016691076		GO:0005524-IEA	ATP binding-IEA
ENBDON_00011	conserved hypothetical protein	MDFANSNSPKRVTSTKIVIAGGFGVGKTTLVGAVSEIVPLRTEALVTNASDGVDNLSATPQKATTTVAMDFGRISLAEDLVLYLFGTPGQHRFWFMWDDLIRGAIGAIVLIDTRRLDESFAAVDFFEARNLPFIVAINEFDDAPRYPTEDIRQALAVSADVPIVSIDARDRESAKSALVTVTEYALRKLHQPVAP	195	20	1.9e-132	0.9797	/data/input/nr_20241120.dmnd	MULTISPECIES: ATP/GTP-binding protein [Rhodococcus]	Rhodococcus	7.5e-131	200	195	6	200	1	195	194	0.9949	0.975	1	1	0		WP_202917485	376	conserved hypothetical protein [Rhodococcus ruber]	Rhodococcus ruber	1.9e-132	195	195	1	195	1	195	195	1	1	1	1	0		CDZ89959	380	RHRU231_590018	1830	CDZ89959
ENBDON_00011	conserved hypothetical protein	MDFANSNSPKRVTSTKIVIAGGFGVGKTTLVGAVSEIVPLRTEALVTNASDGVDNLSATPQKATTTVAMDFGRISLAEDLVLYLFGTPGQHRFWFMWDDLIRGAIGAIVLIDTRRLDESFAAVDFFEARNLPFIVAINEFDDAPRYPTEDIRQALAVSADVPIVSIDARDRESAKSALVTVTEYALRKLHQPVAP	195	20	1.9e-132	0.9797	/data/input/nr_20241120.dmnd	hypothetical protein [Rhodococcus sp. B50]/TWH24682.1 hypothetical protein L618_000100001360 [Rhodococcus rhodochrous J45]/TWH42030.1 hypothetical protein L612_000400000390 [Rhodococcus rhodochrous J38]/SMG26712.1 hypothetical protein SAMN02745947_01633 [Rhodococcus rhodochrous J3]/SNV07400.1 ATP/GTP-binding protein [Rhodococcus rhodochrous]/SUE16059.1 ATP/GTP-binding protein [Rhodococcus gordoni…	Rhodococcus sp. B50/Rhodococcus rhodochrous J45/Rhodococcus rhodochrous J38/Rhodococcus rhodochrous J3/Rhodococcus rhodochrous/Rhodococcus gordoniae/Rhodococcus sp. RDE2/Micromonosporaceae bacterium	1.9e-125	195	193	1	193	1	193	189	0.9793	0.9897	0.9897	1	0		MBS9374548/MBS9374548/MBS9374548/MBS9374548/MBS9374548/MBS9374548/MBS9374548/MBS9374548	362	conserved hypothetical protein [Rhodococcus ruber]	Rhodococcus ruber	1.9e-132	195	195	1	195	1	195	195	1	1	1	1	0		CDZ89959	380	INP59_00045	103816	WP_024102547
ENBDON_00011	conserved hypothetical protein	MDFANSNSPKRVTSTKIVIAGGFGVGKTTLVGAVSEIVPLRTEALVTNASDGVDNLSATPQKATTTVAMDFGRISLAEDLVLYLFGTPGQHRFWFMWDDLIRGAIGAIVLIDTRRLDESFAAVDFFEARNLPFIVAINEFDDAPRYPTEDIRQALAVSADVPIVSIDARDRESAKSALVTVTEYALRKLHQPVAP	195	20	1.9e-132	0.9797	/data/input/nr_20241120.dmnd	MULTISPECIES: ATP/GTP-binding protein [Rhodococcus]/NLV79421.1 ATP/GTP-binding protein [Rhodococcus sp. (in: high G+C Gram-positive bacteria)]	Rhodococcus/Rhodococcus sp. (in: high G+C Gram-positive bacteria)	5.5e-125	195	194	1	194	1	194	190	0.9794	0.9949	0.9949	1	0		WP_226434887/WP_226434887	361	conserved hypothetical protein [Rhodococcus ruber]	Rhodococcus ruber	1.9e-132	195	195	1	195	1	195	195	1	1	1	1	0		CDZ89959	380	BO226_20165	1570939	WP_024102547
ENBDON_00011	conserved hypothetical protein	MDFANSNSPKRVTSTKIVIAGGFGVGKTTLVGAVSEIVPLRTEALVTNASDGVDNLSATPQKATTTVAMDFGRISLAEDLVLYLFGTPGQHRFWFMWDDLIRGAIGAIVLIDTRRLDESFAAVDFFEARNLPFIVAINEFDDAPRYPTEDIRQALAVSADVPIVSIDARDRESAKSALVTVTEYALRKLHQPVAP	195	20	1.9e-132	0.9797	/data/input/nr_20241120.dmnd	ATP/GTP-binding protein [Rhodococcus coprophilus]	Rhodococcus coprophilus	7.8e-125	195	195	1	195	1	195	190	0.9744	1	1	1	0		SQI33570	360	conserved hypothetical protein [Rhodococcus ruber]	Rhodococcus ruber	1.9e-132	195	195	1	195	1	195	195	1	1	1	1	0		CDZ89959	380	BO226_20165	1570939	WP_024102547
ENBDON_00011	conserved hypothetical protein	MDFANSNSPKRVTSTKIVIAGGFGVGKTTLVGAVSEIVPLRTEALVTNASDGVDNLSATPQKATTTVAMDFGRISLAEDLVLYLFGTPGQHRFWFMWDDLIRGAIGAIVLIDTRRLDESFAAVDFFEARNLPFIVAINEFDDAPRYPTEDIRQALAVSADVPIVSIDARDRESAKSALVTVTEYALRKLHQPVAP	195	20	1.9e-132	0.9797	/data/input/nr_20241120.dmnd	hypothetical protein AK37_04618 [Rhodococcus pyridinivorans AK37]/SEB79926.1 hypothetical protein SAMN04490240_0493 [Rhodococcus pyridinivorans]	Rhodococcus pyridinivorans AK37/Rhodococcus pyridinivorans	7.8e-125	195	193	1	193	1	193	188	0.9741	0.9897	0.9897	1	0		EHK85586/EHK85586	360	conserved hypothetical protein [Rhodococcus ruber]	Rhodococcus ruber	1.9e-132	195	195	1	195	1	195	195	1	1	1	1	0		CDZ89959	380	NCTC10994_02609	38310	SQI33570
ENBDON_00011	conserved hypothetical protein	MDFANSNSPKRVTSTKIVIAGGFGVGKTTLVGAVSEIVPLRTEALVTNASDGVDNLSATPQKATTTVAMDFGRISLAEDLVLYLFGTPGQHRFWFMWDDLIRGAIGAIVLIDTRRLDESFAAVDFFEARNLPFIVAINEFDDAPRYPTEDIRQALAVSADVPIVSIDARDRESAKSALVTVTEYALRKLHQPVAP	195	20	1.9e-132	0.9797	/data/input/nr_20241120.dmnd	hypothetical protein EV641_11831 [Rhodococcus sp. SMB37]	Rhodococcus sp. SMB37	1.6e-124	195	194	1	194	1	194	189	0.9742	0.9949	0.9949	1	0		TCN48110	360	conserved hypothetical protein [Rhodococcus ruber]	Rhodococcus ruber	1.9e-132	195	195	1	195	1	195	195	1	1	1	1	0		CDZ89959	380	Z045_14115	1441730	WP_016691076
ENBDON_00011	conserved hypothetical protein	MDFANSNSPKRVTSTKIVIAGGFGVGKTTLVGAVSEIVPLRTEALVTNASDGVDNLSATPQKATTTVAMDFGRISLAEDLVLYLFGTPGQHRFWFMWDDLIRGAIGAIVLIDTRRLDESFAAVDFFEARNLPFIVAINEFDDAPRYPTEDIRQALAVSADVPIVSIDARDRESAKSALVTVTEYALRKLHQPVAP	195	20	1.9e-132	0.9797	/data/input/nr_20241120.dmnd	ATP/GTP-binding protein [Rhodococcus sp. HNM0563]	Rhodococcus sp. HNM0563	7.7e-124	200	194	6	199	1	194	189	0.9742	0.97	0.9949	1	0		WP_206040156	358	conserved hypothetical protein [Rhodococcus ruber]	Rhodococcus ruber	1.9e-132	195	195	1	195	1	195	195	1	1	1	1	0		CDZ89959	380	GX610_03380	1831	NLE78616
ENBDON_00011	conserved hypothetical protein	MDFANSNSPKRVTSTKIVIAGGFGVGKTTLVGAVSEIVPLRTEALVTNASDGVDNLSATPQKATTTVAMDFGRISLAEDLVLYLFGTPGQHRFWFMWDDLIRGAIGAIVLIDTRRLDESFAAVDFFEARNLPFIVAINEFDDAPRYPTEDIRQALAVSADVPIVSIDARDRESAKSALVTVTEYALRKLHQPVAP	195	20	1.9e-132	0.9797	/data/input/nr_20241120.dmnd	MULTISPECIES: ATP/GTP-binding protein [Rhodococcus]/MDO2379403.1 ATP/GTP-binding protein [Rhodococcus ruber]/RIK10848.1 MAG: ATP-binding protein [Acidobacteriota bacterium]/ATQ30120.1 ATP-binding protein [Rhodococcus ruber]/AUM19141.1 ATP-binding protein [Rhodococcus ruber]/AWG97095.1 ATP-binding protein [Rhodococcus ruber]	Rhodococcus/Rhodococcus ruber/Acidobacteriota bacterium/Rhodococcus ruber/Rhodococcus ruber/Rhodococcus ruber	2.5e-123	184	184	1	184	12	195	184	1	1	0.9436	1	0		WP_003936635/WP_003936635/WP_003936635	356	conserved hypothetical protein [Rhodococcus ruber]	Rhodococcus ruber	1.9e-132	195	195	1	195	1	195	195	1	1	1	1	0		CDZ89959	380	Z045_14115	1441730	WP_016691076
ENBDON_00011	conserved hypothetical protein	MDFANSNSPKRVTSTKIVIAGGFGVGKTTLVGAVSEIVPLRTEALVTNASDGVDNLSATPQKATTTVAMDFGRISLAEDLVLYLFGTPGQHRFWFMWDDLIRGAIGAIVLIDTRRLDESFAAVDFFEARNLPFIVAINEFDDAPRYPTEDIRQALAVSADVPIVSIDARDRESAKSALVTVTEYALRKLHQPVAP	195	20	1.9e-132	0.9797	/data/input/nr_20241120.dmnd	MULTISPECIES: ATP/GTP-binding protein [Rhodococcus]/NGP05624.1 ATP/GTP-binding protein [Rhodococcus sp. 14C212]/OOL29693.1 ATP-binding protein [Rhodococcus rhodochrous]/AKE87890.1 ATP-binding protein [Rhodococcus aetherivorans]/ANZ27472.1 ATP-binding protein [Rhodococcus sp. WB1]/KDE11427.1 ATP-binding protein [Rhodococcus aetherivorans]	Rhodococcus/Rhodococcus sp. 14C212/Rhodococcus rhodochrous/Rhodococcus aetherivorans/Rhodococcus sp. WB1/Rhodococcus aetherivorans	2.1e-122	184	184	1	184	12	195	183	0.9946	1	0.9436	1	0		WP_006934480/WP_006934480/WP_006934480/WP_006934480/WP_006934480	354	conserved hypothetical protein [Rhodococcus ruber]	Rhodococcus ruber	1.9e-132	195	195	1	195	1	195	195	1	1	1	1	0		CDZ89959	380	OCS65_01175	191292	WP_006934480
ENBDON_00011	conserved hypothetical protein	MDFANSNSPKRVTSTKIVIAGGFGVGKTTLVGAVSEIVPLRTEALVTNASDGVDNLSATPQKATTTVAMDFGRISLAEDLVLYLFGTPGQHRFWFMWDDLIRGAIGAIVLIDTRRLDESFAAVDFFEARNLPFIVAINEFDDAPRYPTEDIRQALAVSADVPIVSIDARDRESAKSALVTVTEYALRKLHQPVAP	195	20	1.9e-132	0.9797	/data/input/nr_20241120.dmnd	MULTISPECIES: ATP/GTP-binding protein [Rhodococcus]/MBH0123308.1 ATP/GTP-binding protein [Rhodococcus sp. CX]/MCK8672165.1 ATP/GTP-binding protein [Rhodococcus sp. HM1]/MDV2477852.1 ATP/GTP-binding protein [Rhodococcus zopfii]	Rhodococcus/Rhodococcus sp. CX/Rhodococcus sp. HM1/Rhodococcus zopfii	1.1e-119	184	183	1	183	12	194	181	0.9891	0.9946	0.9385	1	0		WP_068159210/WP_068159210/WP_068159210/WP_068159210	347	conserved hypothetical protein [Rhodococcus ruber]	Rhodococcus ruber	1.9e-132	195	195	1	195	1	195	195	1	1	1	1	0		CDZ89959	380	EV641_11831	2512213	TCN48110
ENBDON_00011	conserved hypothetical protein	MDFANSNSPKRVTSTKIVIAGGFGVGKTTLVGAVSEIVPLRTEALVTNASDGVDNLSATPQKATTTVAMDFGRISLAEDLVLYLFGTPGQHRFWFMWDDLIRGAIGAIVLIDTRRLDESFAAVDFFEARNLPFIVAINEFDDAPRYPTEDIRQALAVSADVPIVSIDARDRESAKSALVTVTEYALRKLHQPVAP	195	20	1.9e-132	0.9797	/data/input/nr_20241120.dmnd	ATP/GTP-binding protein [Rhodococcus sp. (in: high G+C Gram-positive bacteria)]/MBF0663423.1 ATP/GTP-binding protein [Rhodococcus sp. (in: high G+C Gram-positive bacteria)]/NMD95613.1 ATP/GTP-binding protein [Rhodococcus sp. BL-253-APC-6A1W]/NME79609.1 ATP/GTP-binding protein [Rhodococcus sp. 105337]	Rhodococcus sp. (in: high G+C Gram-positive bacteria)/Rhodococcus sp. (in: high G+C Gram-positive bacteria)/Rhodococcus sp. BL-253-APC-6A1W/Rhodococcus sp. 105337	3.3e-119	184	184	1	184	12	195	180	0.9783	1	0.9436	1	0		WP_169621077/WP_169621077/WP_169621077	346	conserved hypothetical protein [Rhodococcus ruber]	Rhodococcus ruber	1.9e-132	195	195	1	195	1	195	195	1	1	1	1	0		CDZ89959	380	AK37_04618	1114960	EHK85586
ENBDON_00011	conserved hypothetical protein	MDFANSNSPKRVTSTKIVIAGGFGVGKTTLVGAVSEIVPLRTEALVTNASDGVDNLSATPQKATTTVAMDFGRISLAEDLVLYLFGTPGQHRFWFMWDDLIRGAIGAIVLIDTRRLDESFAAVDFFEARNLPFIVAINEFDDAPRYPTEDIRQALAVSADVPIVSIDARDRESAKSALVTVTEYALRKLHQPVAP	195	20	1.9e-132	0.9797	/data/input/nr_20241120.dmnd	ATP/GTP-binding protein [Rhodococcus coprophilus]/MBM7458812.1 signal recognition particle receptor subunit beta [Rhodococcus coprophilus]	Rhodococcus coprophilus/Rhodococcus coprophilus	3.9e-118	184	184	1	184	12	195	180	0.9783	1	0.9436	1	0		WP_072701134	343	conserved hypothetical protein [Rhodococcus ruber]	Rhodococcus ruber	1.9e-132	195	195	1	195	1	195	195	1	1	1	1	0		CDZ89959	380	Y013_16535	1435356	WP_024102547
ENBDON_00011	conserved hypothetical protein	MDFANSNSPKRVTSTKIVIAGGFGVGKTTLVGAVSEIVPLRTEALVTNASDGVDNLSATPQKATTTVAMDFGRISLAEDLVLYLFGTPGQHRFWFMWDDLIRGAIGAIVLIDTRRLDESFAAVDFFEARNLPFIVAINEFDDAPRYPTEDIRQALAVSADVPIVSIDARDRESAKSALVTVTEYALRKLHQPVAP	195	20	1.9e-132	0.9797	/data/input/nr_20241120.dmnd	MULTISPECIES: ATP/GTP-binding protein [Rhodococcus]/AYA24543.1 ATP-binding protein [Rhodococcus rhodochrous]/KSZ58303.1 ATP-binding protein [Rhodococcus pyridinivorans KG-16]/MBF4480529.1 ATP/GTP-binding protein [Rhodococcus rhodochrous]/MCB8911468.1 ATP/GTP-binding protein [Rhodococcus rhodochrous]/MCD2097705.1 ATP/GTP-binding protein [Rhodococcus rhodochrous]	Rhodococcus/Rhodococcus rhodochrous/Rhodococcus pyridinivorans KG-16/Rhodococcus rhodochrous/Rhodococcus rhodochrous/Rhodococcus rhodochrous	5.5e-118	184	182	1	182	12	193	179	0.9835	0.9891	0.9333	1	0		WP_016691076/WP_016691076/WP_016691076	343	conserved hypothetical protein [Rhodococcus ruber]	Rhodococcus ruber	1.9e-132	195	195	1	195	1	195	195	1	1	1	1	0		CDZ89959	380	Y013_16535	1435356	WP_024102547
ENBDON_00011	conserved hypothetical protein	MDFANSNSPKRVTSTKIVIAGGFGVGKTTLVGAVSEIVPLRTEALVTNASDGVDNLSATPQKATTTVAMDFGRISLAEDLVLYLFGTPGQHRFWFMWDDLIRGAIGAIVLIDTRRLDESFAAVDFFEARNLPFIVAINEFDDAPRYPTEDIRQALAVSADVPIVSIDARDRESAKSALVTVTEYALRKLHQPVAP	195	20	1.9e-132	0.9797	/data/input/nr_20241120.dmnd	ATP/GTP-binding protein [Rhodococcus sp. (in: high G+C Gram-positive bacteria)]	Rhodococcus sp. (in: high G+C Gram-positive bacteria)	5.5e-118	194	192	1	192	1	192	181	0.9427	0.9897	0.9846	1	0		NLE78616	343	conserved hypothetical protein [Rhodococcus ruber]	Rhodococcus ruber	1.9e-132	195	195	1	195	1	195	195	1	1	1	1	0		CDZ89959	380
ENBDON_00011	conserved hypothetical protein	MDFANSNSPKRVTSTKIVIAGGFGVGKTTLVGAVSEIVPLRTEALVTNASDGVDNLSATPQKATTTVAMDFGRISLAEDLVLYLFGTPGQHRFWFMWDDLIRGAIGAIVLIDTRRLDESFAAVDFFEARNLPFIVAINEFDDAPRYPTEDIRQALAVSADVPIVSIDARDRESAKSALVTVTEYALRKLHQPVAP	195	20	1.9e-132	0.9797	/data/input/nr_20241120.dmnd	MULTISPECIES: ATP/GTP-binding protein [Rhodococcus]/AHD22140.1 ATP-binding protein [Rhodococcus pyridinivorans SB3094]/AOD21304.1 ATP-binding protein [Rhodococcus sp. p52]/APE11227.1 ATP-binding protein [Rhodococcus sp. 2G]/AWZ23278.1 ATP-binding protein [Rhodococcus pyridinivorans]/KHJ73823.1 ATP-binding protein [Rhodococcus sp. Chr-9]	Rhodococcus/Rhodococcus pyridinivorans SB3094/Rhodococcus sp. p52/Rhodococcus sp. 2G/Rhodococcus pyridinivorans/Rhodococcus sp. Chr-9	2.2e-117	184	182	1	182	12	193	178	0.978	0.9891	0.9333	1	0		WP_024102547/WP_024102547/WP_024102547/WP_024102547/WP_024102547/WP_024102547	341	conserved hypothetical protein [Rhodococcus ruber]	Rhodococcus ruber	1.9e-132	195	195	1	195	1	195	195	1	1	1	1	0		CDZ89959	380
ENBDON_00011	conserved hypothetical protein	MDFANSNSPKRVTSTKIVIAGGFGVGKTTLVGAVSEIVPLRTEALVTNASDGVDNLSATPQKATTTVAMDFGRISLAEDLVLYLFGTPGQHRFWFMWDDLIRGAIGAIVLIDTRRLDESFAAVDFFEARNLPFIVAINEFDDAPRYPTEDIRQALAVSADVPIVSIDARDRESAKSALVTVTEYALRKLHQPVAP	195	20	1.9e-132	0.9797	/data/input/nr_20241120.dmnd	MULTISPECIES: ATP/GTP-binding protein [Rhodococcus]/MCK0091457.1 ATP/GTP-binding protein [Rhodococcus sp. F64268]/MEE2057914.1 ATP/GTP-binding protein [Rhodococcus artemisiae]/NLU63672.1 ATP/GTP-binding protein [Rhodococcus sp. HNM0563]	Rhodococcus/Rhodococcus sp. F64268/Rhodococcus artemisiae/Rhodococcus sp. HNM0563	4.5e-117	184	183	1	183	12	194	179	0.9781	0.9946	0.9385	1	0		WP_054715879/WP_054715879/WP_054715879/WP_054715879	340	conserved hypothetical protein [Rhodococcus ruber]	Rhodococcus ruber	1.9e-132	195	195	1	195	1	195	195	1	1	1	1	0		CDZ89959	380
ENBDON_00011	conserved hypothetical protein	MDFANSNSPKRVTSTKIVIAGGFGVGKTTLVGAVSEIVPLRTEALVTNASDGVDNLSATPQKATTTVAMDFGRISLAEDLVLYLFGTPGQHRFWFMWDDLIRGAIGAIVLIDTRRLDESFAAVDFFEARNLPFIVAINEFDDAPRYPTEDIRQALAVSADVPIVSIDARDRESAKSALVTVTEYALRKLHQPVAP	195	20	1.9e-132	0.9797	/data/input/nr_20241120.dmnd	ATP/GTP-binding protein [Rhodococcus sp. CC-R104]/MEE2031754.1 ATP/GTP-binding protein [Rhodococcus sp. CC-R104]	Rhodococcus sp. CC-R104/Rhodococcus sp. CC-R104	1.3e-116	184	182	1	182	12	193	178	0.978	0.9891	0.9333	1	0		WP_330151188	339	conserved hypothetical protein [Rhodococcus ruber]	Rhodococcus ruber	1.9e-132	195	195	1	195	1	195	195	1	1	1	1	0		CDZ89959	380
ENBDON_00011	conserved hypothetical protein	MDFANSNSPKRVTSTKIVIAGGFGVGKTTLVGAVSEIVPLRTEALVTNASDGVDNLSATPQKATTTVAMDFGRISLAEDLVLYLFGTPGQHRFWFMWDDLIRGAIGAIVLIDTRRLDESFAAVDFFEARNLPFIVAINEFDDAPRYPTEDIRQALAVSADVPIVSIDARDRESAKSALVTVTEYALRKLHQPVAP	195	20	1.9e-132	0.9797	/data/input/nr_20241120.dmnd	ATP/GTP-binding protein [Rhodococcus sp. D2-41]/MDG3009251.1 ATP/GTP-binding protein [Rhodococcus sp. D2-41]	Rhodococcus sp. D2-41/Rhodococcus sp. D2-41	3.7e-116	194	194	1	194	1	194	184	0.9485	1	0.9949	1	0		WP_277830236	338	conserved hypothetical protein [Rhodococcus ruber]	Rhodococcus ruber	1.9e-132	195	195	1	195	1	195	195	1	1	1	1	0		CDZ89959	380
ENBDON_00012	MHYT domain-containing protein	MDTHVHLFGMGTWVLVLAYVTATIGLLVGLASARKSLTAGSERSRLYWLMRAALSTGGVGVWLAHFLPMAGFTVDGSIIRYDLPGIVFSMAVALVSAFVAMVVVQPKRMSRRARPSRGAAAVRLLGGSLVLGAGIAGVHYSIMWAMELQGTVAYDTTYVAVSVVAAWLTAVVILWLVTVADRRWMRIVGSIVAGAAVIGVHFLAMAAVRVTVDSSTAAPSGVEVFAVLFPVFVLGMLILTVPIMALLMAPDRVAAALEAEAEAWAQEHRPIDPRSSVA	278	20	7.6e-180	0.933	/data/input/nr_20241120.dmnd	MHYT domain-containing protein [Rhodococcus ruber]	Rhodococcus ruber	7.6e-180	278	278	1	278	1	278	278	1	1	1	1	0		WP_040782328	506	MHYT domain-containing protein [Rhodococcus ruber]	Rhodococcus ruber	7.6e-180	278	278	1	278	1	278	278	1	1	1	1	0		WP_040782328	506	HFP48_00065	2722825	WP_050034257		GO:0016020-IEA	membrane-IEA
ENBDON_00012	MHYT domain-containing protein	MDTHVHLFGMGTWVLVLAYVTATIGLLVGLASARKSLTAGSERSRLYWLMRAALSTGGVGVWLAHFLPMAGFTVDGSIIRYDLPGIVFSMAVALVSAFVAMVVVQPKRMSRRARPSRGAAAVRLLGGSLVLGAGIAGVHYSIMWAMELQGTVAYDTTYVAVSVVAAWLTAVVILWLVTVADRRWMRIVGSIVAGAAVIGVHFLAMAAVRVTVDSSTAAPSGVEVFAVLFPVFVLGMLILTVPIMALLMAPDRVAAALEAEAEAWAQEHRPIDPRSSVA	278	20	7.6e-180	0.933	/data/input/nr_20241120.dmnd	MHYT domain-containing protein [Rhodococcus indonesiensis]/MDM7489170.1 MHYT domain-containing protein [Rhodococcus indonesiensis]	Rhodococcus indonesiensis/Rhodococcus indonesiensis	1.8e-178	278	278	1	278	1	278	276	0.9928	1	1	1	0		WP_289379252	503	MHYT domain-containing protein [Rhodococcus ruber]	Rhodococcus ruber	7.6e-180	278	278	1	278	1	278	278	1	1	1	1	0		WP_040782328	506	OCS65_01170	191292	WP_029546809
ENBDON_00012	MHYT domain-containing protein	MDTHVHLFGMGTWVLVLAYVTATIGLLVGLASARKSLTAGSERSRLYWLMRAALSTGGVGVWLAHFLPMAGFTVDGSIIRYDLPGIVFSMAVALVSAFVAMVVVQPKRMSRRARPSRGAAAVRLLGGSLVLGAGIAGVHYSIMWAMELQGTVAYDTTYVAVSVVAAWLTAVVILWLVTVADRRWMRIVGSIVAGAAVIGVHFLAMAAVRVTVDSSTAAPSGVEVFAVLFPVFVLGMLILTVPIMALLMAPDRVAAALEAEAEAWAQEHRPIDPRSSVA	278	20	7.6e-180	0.933	/data/input/nr_20241120.dmnd	signaling protein [Rhodococcus ruber BKS 20-38]	Rhodococcus ruber BKS 20-38	1.2e-175	274	273	2	274	6	278	273	1	0.9964	0.982	1	0		EME64443	496	MHYT domain-containing protein [Rhodococcus ruber]	Rhodococcus ruber	7.6e-180	278	278	1	278	1	278	278	1	1	1	1	0		WP_040782328	506	HF877_09420	2725307	NMD95612
ENBDON_00012	MHYT domain-containing protein	MDTHVHLFGMGTWVLVLAYVTATIGLLVGLASARKSLTAGSERSRLYWLMRAALSTGGVGVWLAHFLPMAGFTVDGSIIRYDLPGIVFSMAVALVSAFVAMVVVQPKRMSRRARPSRGAAAVRLLGGSLVLGAGIAGVHYSIMWAMELQGTVAYDTTYVAVSVVAAWLTAVVILWLVTVADRRWMRIVGSIVAGAAVIGVHFLAMAAVRVTVDSSTAAPSGVEVFAVLFPVFVLGMLILTVPIMALLMAPDRVAAALEAEAEAWAQEHRPIDPRSSVA	278	20	7.6e-180	0.933	/data/input/nr_20241120.dmnd	MHYT domain-containing protein [Rhodococcus rhodochrous]/KOS58093.1 signaling protein [Rhodococcus rhodochrous KG-21]	Rhodococcus rhodochrous/Rhodococcus rhodochrous KG-21	4.7e-174	278	278	1	278	1	278	271	0.9748	1	1	1	0		WP_054370850/WP_054370850	492	MHYT domain-containing protein [Rhodococcus ruber]	Rhodococcus ruber	7.6e-180	278	278	1	278	1	278	278	1	1	1	1	0		WP_040782328	506	RHRU231_590019	1830	WP_017681013
ENBDON_00012	MHYT domain-containing protein	MDTHVHLFGMGTWVLVLAYVTATIGLLVGLASARKSLTAGSERSRLYWLMRAALSTGGVGVWLAHFLPMAGFTVDGSIIRYDLPGIVFSMAVALVSAFVAMVVVQPKRMSRRARPSRGAAAVRLLGGSLVLGAGIAGVHYSIMWAMELQGTVAYDTTYVAVSVVAAWLTAVVILWLVTVADRRWMRIVGSIVAGAAVIGVHFLAMAAVRVTVDSSTAAPSGVEVFAVLFPVFVLGMLILTVPIMALLMAPDRVAAALEAEAEAWAQEHRPIDPRSSVA	278	20	7.6e-180	0.933	/data/input/nr_20241120.dmnd	MHYT domain-containing protein [Rhodococcus sp. A5(2022)]/MCZ1073790.1 signaling protein [Rhodococcus sp. A5(2022)]	Rhodococcus sp. A5(2022)/Rhodococcus sp. A5(2022)	1.9e-173	278	278	1	278	1	278	272	0.9784	1	1	1	0		WP_268965890	490	MHYT domain-containing protein [Rhodococcus ruber]	Rhodococcus ruber	7.6e-180	278	278	1	278	1	278	278	1	1	1	1	0		WP_040782328	506	G352_12709	1278076	EME64443
ENBDON_00012	MHYT domain-containing protein	MDTHVHLFGMGTWVLVLAYVTATIGLLVGLASARKSLTAGSERSRLYWLMRAALSTGGVGVWLAHFLPMAGFTVDGSIIRYDLPGIVFSMAVALVSAFVAMVVVQPKRMSRRARPSRGAAAVRLLGGSLVLGAGIAGVHYSIMWAMELQGTVAYDTTYVAVSVVAAWLTAVVILWLVTVADRRWMRIVGSIVAGAAVIGVHFLAMAAVRVTVDSSTAAPSGVEVFAVLFPVFVLGMLILTVPIMALLMAPDRVAAALEAEAEAWAQEHRPIDPRSSVA	278	20	7.6e-180	0.933	/data/input/nr_20241120.dmnd	MHYT domain-containing protein [Rhodococcus ruber]/QRE79150.1 signaling protein [Rhodococcus ruber]/RQM33784.1 signaling protein [Rhodococcus ruber]	Rhodococcus ruber/Rhodococcus ruber/Rhodococcus ruber	2.7e-173	278	278	1	278	1	278	272	0.9784	1	1	1	0		WP_124258888	490	MHYT domain-containing protein [Rhodococcus ruber]	Rhodococcus ruber	7.6e-180	278	278	1	278	1	278	278	1	1	1	1	0		WP_040782328	506	Z051_00470	1441923	WP_054370850
ENBDON_00012	MHYT domain-containing protein	MDTHVHLFGMGTWVLVLAYVTATIGLLVGLASARKSLTAGSERSRLYWLMRAALSTGGVGVWLAHFLPMAGFTVDGSIIRYDLPGIVFSMAVALVSAFVAMVVVQPKRMSRRARPSRGAAAVRLLGGSLVLGAGIAGVHYSIMWAMELQGTVAYDTTYVAVSVVAAWLTAVVILWLVTVADRRWMRIVGSIVAGAAVIGVHFLAMAAVRVTVDSSTAAPSGVEVFAVLFPVFVLGMLILTVPIMALLMAPDRVAAALEAEAEAWAQEHRPIDPRSSVA	278	20	7.6e-180	0.933	/data/input/nr_20241120.dmnd	MHYT domain-containing protein [Rhodococcus ruber]/AWG97096.1 signaling protein [Rhodococcus ruber]/MCF8784760.1 signaling protein [Rhodococcus ruber]	Rhodococcus ruber/Rhodococcus ruber/Rhodococcus ruber	3.9e-173	278	278	1	278	1	278	272	0.9784	1	1	1	0		WP_064066403	489	MHYT domain-containing protein [Rhodococcus ruber]	Rhodococcus ruber	7.6e-180	278	278	1	278	1	278	278	1	1	1	1	0		WP_040782328	506
ENBDON_00012	MHYT domain-containing protein	MDTHVHLFGMGTWVLVLAYVTATIGLLVGLASARKSLTAGSERSRLYWLMRAALSTGGVGVWLAHFLPMAGFTVDGSIIRYDLPGIVFSMAVALVSAFVAMVVVQPKRMSRRARPSRGAAAVRLLGGSLVLGAGIAGVHYSIMWAMELQGTVAYDTTYVAVSVVAAWLTAVVILWLVTVADRRWMRIVGSIVAGAAVIGVHFLAMAAVRVTVDSSTAAPSGVEVFAVLFPVFVLGMLILTVPIMALLMAPDRVAAALEAEAEAWAQEHRPIDPRSSVA	278	20	7.6e-180	0.933	/data/input/nr_20241120.dmnd	MULTISPECIES: MHYT domain-containing protein [Rhodococcus]/MDO2379404.1 MHYT domain-containing protein [Rhodococcus ruber]/RIK10847.1 MAG: signaling protein [Acidobacteriota bacterium]/ATQ30121.1 signaling protein [Rhodococcus ruber]/AUM19142.1 signaling protein [Rhodococcus ruber]/AXY49475.1 hypothetical protein YT1_0015 [Rhodococcus ruber]	Rhodococcus/Rhodococcus ruber/Acidobacteriota bacterium/Rhodococcus ruber/Rhodococcus ruber/Rhodococcus ruber	7.8e-173	278	278	1	278	1	278	271	0.9748	1	1	1	0		WP_017681013/WP_017681013/WP_017681013	489	MHYT domain-containing protein [Rhodococcus ruber]	Rhodococcus ruber	7.6e-180	278	278	1	278	1	278	278	1	1	1	1	0		WP_040782328	506
ENBDON_00012	MHYT domain-containing protein	MDTHVHLFGMGTWVLVLAYVTATIGLLVGLASARKSLTAGSERSRLYWLMRAALSTGGVGVWLAHFLPMAGFTVDGSIIRYDLPGIVFSMAVALVSAFVAMVVVQPKRMSRRARPSRGAAAVRLLGGSLVLGAGIAGVHYSIMWAMELQGTVAYDTTYVAVSVVAAWLTAVVILWLVTVADRRWMRIVGSIVAGAAVIGVHFLAMAAVRVTVDSSTAAPSGVEVFAVLFPVFVLGMLILTVPIMALLMAPDRVAAALEAEAEAWAQEHRPIDPRSSVA	278	20	7.6e-180	0.933	/data/input/nr_20241120.dmnd	signaling protein [Rhodococcus sp. (in: high G+C Gram-positive bacteria)]	Rhodococcus sp. (in: high G+C Gram-positive bacteria)	1.6e-172	278	278	1	278	1	278	271	0.9748	1	1	1	0		MDX5452953	488	MHYT domain-containing protein [Rhodococcus ruber]	Rhodococcus ruber	7.6e-180	278	278	1	278	1	278	278	1	1	1	1	0		WP_040782328	506
ENBDON_00012	MHYT domain-containing protein	MDTHVHLFGMGTWVLVLAYVTATIGLLVGLASARKSLTAGSERSRLYWLMRAALSTGGVGVWLAHFLPMAGFTVDGSIIRYDLPGIVFSMAVALVSAFVAMVVVQPKRMSRRARPSRGAAAVRLLGGSLVLGAGIAGVHYSIMWAMELQGTVAYDTTYVAVSVVAAWLTAVVILWLVTVADRRWMRIVGSIVAGAAVIGVHFLAMAAVRVTVDSSTAAPSGVEVFAVLFPVFVLGMLILTVPIMALLMAPDRVAAALEAEAEAWAQEHRPIDPRSSVA	278	20	7.6e-180	0.933	/data/input/nr_20241120.dmnd	MHYT domain-containing protein [Rhodococcus ruber]/MBD8055147.1 signaling protein [Rhodococcus ruber]	Rhodococcus ruber/Rhodococcus ruber	2.6e-171	278	278	1	278	1	278	271	0.9748	1	1	1	0		WP_191902684	485	MHYT domain-containing protein [Rhodococcus ruber]	Rhodococcus ruber	7.6e-180	278	278	1	278	1	278	278	1	1	1	1	0		WP_040782328	506
ENBDON_00012	MHYT domain-containing protein	MDTHVHLFGMGTWVLVLAYVTATIGLLVGLASARKSLTAGSERSRLYWLMRAALSTGGVGVWLAHFLPMAGFTVDGSIIRYDLPGIVFSMAVALVSAFVAMVVVQPKRMSRRARPSRGAAAVRLLGGSLVLGAGIAGVHYSIMWAMELQGTVAYDTTYVAVSVVAAWLTAVVILWLVTVADRRWMRIVGSIVAGAAVIGVHFLAMAAVRVTVDSSTAAPSGVEVFAVLFPVFVLGMLILTVPIMALLMAPDRVAAALEAEAEAWAQEHRPIDPRSSVA	278	20	7.6e-180	0.933	/data/input/nr_20241120.dmnd	signaling protein [Rhodococcus rhodochrous]	Rhodococcus rhodochrous	3.6e-162	278	274	1	274	1	274	262	0.9562	0.9856	0.9856	1	0		OOL29694	462	MHYT domain-containing protein [Rhodococcus ruber]	Rhodococcus ruber	7.6e-180	278	278	1	278	1	278	278	1	1	1	1	0		WP_040782328	506
ENBDON_00012	MHYT domain-containing protein	MDTHVHLFGMGTWVLVLAYVTATIGLLVGLASARKSLTAGSERSRLYWLMRAALSTGGVGVWLAHFLPMAGFTVDGSIIRYDLPGIVFSMAVALVSAFVAMVVVQPKRMSRRARPSRGAAAVRLLGGSLVLGAGIAGVHYSIMWAMELQGTVAYDTTYVAVSVVAAWLTAVVILWLVTVADRRWMRIVGSIVAGAAVIGVHFLAMAAVRVTVDSSTAAPSGVEVFAVLFPVFVLGMLILTVPIMALLMAPDRVAAALEAEAEAWAQEHRPIDPRSSVA	278	20	7.6e-180	0.933	/data/input/nr_20241120.dmnd	MHYT domain-containing protein [Rhodococcus sp. 11-3]/USC15413.1 signaling protein [Rhodococcus sp. 11-3]	Rhodococcus sp. 11-3/Rhodococcus sp. 11-3	4.2e-161	278	274	1	274	1	274	261	0.9526	0.9856	0.9856	1	0		WP_251549977	459	MHYT domain-containing protein [Rhodococcus ruber]	Rhodococcus ruber	7.6e-180	278	278	1	278	1	278	278	1	1	1	1	0		WP_040782328	506
ENBDON_00012	MHYT domain-containing protein	MDTHVHLFGMGTWVLVLAYVTATIGLLVGLASARKSLTAGSERSRLYWLMRAALSTGGVGVWLAHFLPMAGFTVDGSIIRYDLPGIVFSMAVALVSAFVAMVVVQPKRMSRRARPSRGAAAVRLLGGSLVLGAGIAGVHYSIMWAMELQGTVAYDTTYVAVSVVAAWLTAVVILWLVTVADRRWMRIVGSIVAGAAVIGVHFLAMAAVRVTVDSSTAAPSGVEVFAVLFPVFVLGMLILTVPIMALLMAPDRVAAALEAEAEAWAQEHRPIDPRSSVA	278	20	7.6e-180	0.933	/data/input/nr_20241120.dmnd	MULTISPECIES: MHYT domain-containing protein [Rhodococcus]/ETT26597.1 putative integral membrane sensor protein [Rhodococcus rhodochrous ATCC 21198]/NCL77098.1 hypothetical protein [Rhodococcus sp. YH1]/ANZ27471.1 signaling protein [Rhodococcus sp. WB1]/MBC2590278.1 signaling protein [Rhodococcus aetherivorans]/NGP25224.1 signaling protein [Rhodococcus aetherivorans]	Rhodococcus/Rhodococcus rhodochrous ATCC 21198/Rhodococcus sp. YH1/Rhodococcus sp. WB1/Rhodococcus aetherivorans/Rhodococcus aetherivorans	1.7e-160	278	274	1	274	1	274	260	0.9489	0.9856	0.9856	1	0		WP_006934481/WP_006934481/WP_006934481/WP_006934481/WP_006934481	457	MHYT domain-containing protein [Rhodococcus ruber]	Rhodococcus ruber	7.6e-180	278	278	1	278	1	278	278	1	1	1	1	0		WP_040782328	506
ENBDON_00012	MHYT domain-containing protein	MDTHVHLFGMGTWVLVLAYVTATIGLLVGLASARKSLTAGSERSRLYWLMRAALSTGGVGVWLAHFLPMAGFTVDGSIIRYDLPGIVFSMAVALVSAFVAMVVVQPKRMSRRARPSRGAAAVRLLGGSLVLGAGIAGVHYSIMWAMELQGTVAYDTTYVAVSVVAAWLTAVVILWLVTVADRRWMRIVGSIVAGAAVIGVHFLAMAAVRVTVDSSTAAPSGVEVFAVLFPVFVLGMLILTVPIMALLMAPDRVAAALEAEAEAWAQEHRPIDPRSSVA	278	20	7.6e-180	0.933	/data/input/nr_20241120.dmnd	MHYT domain-containing protein [Rhodococcus aetherivorans]/KDE11428.1 signaling protein [Rhodococcus aetherivorans]/MDV6293294.1 MHYT domain-containing protein [Rhodococcus aetherivorans]/UYF94418.1 signaling protein [Rhodococcus aetherivorans]/WFS11842.1 MHYT domain-containing protein [Rhodococcus aetherivorans]	Rhodococcus aetherivorans/Rhodococcus aetherivorans/Rhodococcus aetherivorans/Rhodococcus aetherivorans/Rhodococcus aetherivorans	1.7e-160	278	274	1	274	1	274	260	0.9489	0.9856	0.9856	1	0		WP_029546809	457	MHYT domain-containing protein [Rhodococcus ruber]	Rhodococcus ruber	7.6e-180	278	278	1	278	1	278	278	1	1	1	1	0		WP_040782328	506
ENBDON_00012	MHYT domain-containing protein	MDTHVHLFGMGTWVLVLAYVTATIGLLVGLASARKSLTAGSERSRLYWLMRAALSTGGVGVWLAHFLPMAGFTVDGSIIRYDLPGIVFSMAVALVSAFVAMVVVQPKRMSRRARPSRGAAAVRLLGGSLVLGAGIAGVHYSIMWAMELQGTVAYDTTYVAVSVVAAWLTAVVILWLVTVADRRWMRIVGSIVAGAAVIGVHFLAMAAVRVTVDSSTAAPSGVEVFAVLFPVFVLGMLILTVPIMALLMAPDRVAAALEAEAEAWAQEHRPIDPRSSVA	278	20	7.6e-180	0.933	/data/input/nr_20241120.dmnd	MULTISPECIES: MHYT domain-containing protein [Rhodococcus]/AKE87891.1 signaling protein [Rhodococcus aetherivorans]/QIX48131.1 signaling protein [Rhodococcus sp. DMU1]	Rhodococcus/Rhodococcus aetherivorans/Rhodococcus sp. DMU1	2.8e-159	278	274	1	274	1	274	261	0.9526	0.9856	0.9856	1	0		WP_050034257/WP_050034257/WP_050034257	454	MHYT domain-containing protein [Rhodococcus ruber]	Rhodococcus ruber	7.6e-180	278	278	1	278	1	278	278	1	1	1	1	0		WP_040782328	506
ENBDON_00012	MHYT domain-containing protein	MDTHVHLFGMGTWVLVLAYVTATIGLLVGLASARKSLTAGSERSRLYWLMRAALSTGGVGVWLAHFLPMAGFTVDGSIIRYDLPGIVFSMAVALVSAFVAMVVVQPKRMSRRARPSRGAAAVRLLGGSLVLGAGIAGVHYSIMWAMELQGTVAYDTTYVAVSVVAAWLTAVVILWLVTVADRRWMRIVGSIVAGAAVIGVHFLAMAAVRVTVDSSTAAPSGVEVFAVLFPVFVLGMLILTVPIMALLMAPDRVAAALEAEAEAWAQEHRPIDPRSSVA	278	20	7.6e-180	0.933	/data/input/nr_20241120.dmnd	MHYT domain-containing protein [Rhodococcus sp. 14C212]/NGP05625.1 signaling protein [Rhodococcus sp. 14C212]	Rhodococcus sp. 14C212/Rhodococcus sp. 14C212	1.6e-156	278	274	1	274	1	274	258	0.9416	0.9856	0.9856	1	0		WP_165037347	447	MHYT domain-containing protein [Rhodococcus ruber]	Rhodococcus ruber	7.6e-180	278	278	1	278	1	278	278	1	1	1	1	0		WP_040782328	506
ENBDON_00012	MHYT domain-containing protein	MDTHVHLFGMGTWVLVLAYVTATIGLLVGLASARKSLTAGSERSRLYWLMRAALSTGGVGVWLAHFLPMAGFTVDGSIIRYDLPGIVFSMAVALVSAFVAMVVVQPKRMSRRARPSRGAAAVRLLGGSLVLGAGIAGVHYSIMWAMELQGTVAYDTTYVAVSVVAAWLTAVVILWLVTVADRRWMRIVGSIVAGAAVIGVHFLAMAAVRVTVDSSTAAPSGVEVFAVLFPVFVLGMLILTVPIMALLMAPDRVAAALEAEAEAWAQEHRPIDPRSSVA	278	20	7.6e-180	0.933	/data/input/nr_20241120.dmnd	MHYT domain-containing protein, partial [Rhodococcus sp. P14]	Rhodococcus sp. P14	1.7e-109	180	180	1	180	1	180	176	0.9778	1	0.6475	1	0		WP_010595450	325	MHYT domain-containing protein [Rhodococcus ruber]	Rhodococcus ruber	7.6e-180	278	278	1	278	1	278	278	1	1	1	1	0		WP_040782328	506
ENBDON_00012	MHYT domain-containing protein	MDTHVHLFGMGTWVLVLAYVTATIGLLVGLASARKSLTAGSERSRLYWLMRAALSTGGVGVWLAHFLPMAGFTVDGSIIRYDLPGIVFSMAVALVSAFVAMVVVQPKRMSRRARPSRGAAAVRLLGGSLVLGAGIAGVHYSIMWAMELQGTVAYDTTYVAVSVVAAWLTAVVILWLVTVADRRWMRIVGSIVAGAAVIGVHFLAMAAVRVTVDSSTAAPSGVEVFAVLFPVFVLGMLILTVPIMALLMAPDRVAAALEAEAEAWAQEHRPIDPRSSVA	278	20	7.6e-180	0.933	/data/input/nr_20241120.dmnd	MULTISPECIES: MHYT domain-containing protein [Rhodococcus]/NLV79422.1 signaling protein [Rhodococcus sp. (in: high G+C Gram-positive bacteria)]	Rhodococcus/Rhodococcus sp. (in: high G+C Gram-positive bacteria)	1.2e-77	269	268	1	259	1	268	192	0.7164	0.9963	0.964	1	0		WP_226434886/WP_226434886	247	MHYT domain-containing protein [Rhodococcus ruber]	Rhodococcus ruber	7.6e-180	278	278	1	278	1	278	278	1	1	1	1	0		WP_040782328	506
ENBDON_00012	MHYT domain-containing protein	MDTHVHLFGMGTWVLVLAYVTATIGLLVGLASARKSLTAGSERSRLYWLMRAALSTGGVGVWLAHFLPMAGFTVDGSIIRYDLPGIVFSMAVALVSAFVAMVVVQPKRMSRRARPSRGAAAVRLLGGSLVLGAGIAGVHYSIMWAMELQGTVAYDTTYVAVSVVAAWLTAVVILWLVTVADRRWMRIVGSIVAGAAVIGVHFLAMAAVRVTVDSSTAAPSGVEVFAVLFPVFVLGMLILTVPIMALLMAPDRVAAALEAEAEAWAQEHRPIDPRSSVA	278	20	7.6e-180	0.933	/data/input/nr_20241120.dmnd	signaling protein [Rhodococcus sp. BL-253-APC-6A1W]/NME79608.1 signaling protein [Rhodococcus sp. 105337]	Rhodococcus sp. BL-253-APC-6A1W/Rhodococcus sp. 105337	4.6e-76	264	259	7	254	7	264	186	0.7181	0.9811	0.9317	1	0		NMD95612/NMD95612	243	MHYT domain-containing protein [Rhodococcus ruber]	Rhodococcus ruber	7.6e-180	278	278	1	278	1	278	278	1	1	1	1	0		WP_040782328	506
ENBDON_00012	MHYT domain-containing protein	MDTHVHLFGMGTWVLVLAYVTATIGLLVGLASARKSLTAGSERSRLYWLMRAALSTGGVGVWLAHFLPMAGFTVDGSIIRYDLPGIVFSMAVALVSAFVAMVVVQPKRMSRRARPSRGAAAVRLLGGSLVLGAGIAGVHYSIMWAMELQGTVAYDTTYVAVSVVAAWLTAVVILWLVTVADRRWMRIVGSIVAGAAVIGVHFLAMAAVRVTVDSSTAAPSGVEVFAVLFPVFVLGMLILTVPIMALLMAPDRVAAALEAEAEAWAQEHRPIDPRSSVA	278	20	7.6e-180	0.933	/data/input/nr_20241120.dmnd	MULTISPECIES: MHYT domain-containing protein [unclassified Rhodococcus (in: high G+C Gram-positive bacteria)]	unclassified Rhodococcus (in: high G+C Gram-positive bacteria)	3.9e-75	255	256	1	245	10	264	184	0.7188	1.0039	0.9209	1	0		WP_206036875	240	MHYT domain-containing protein [Rhodococcus ruber]	Rhodococcus ruber	7.6e-180	278	278	1	278	1	278	278	1	1	1	1	0		WP_040782328	506
ENBDON_00012	MHYT domain-containing protein	MDTHVHLFGMGTWVLVLAYVTATIGLLVGLASARKSLTAGSERSRLYWLMRAALSTGGVGVWLAHFLPMAGFTVDGSIIRYDLPGIVFSMAVALVSAFVAMVVVQPKRMSRRARPSRGAAAVRLLGGSLVLGAGIAGVHYSIMWAMELQGTVAYDTTYVAVSVVAAWLTAVVILWLVTVADRRWMRIVGSIVAGAAVIGVHFLAMAAVRVTVDSSTAAPSGVEVFAVLFPVFVLGMLILTVPIMALLMAPDRVAAALEAEAEAWAQEHRPIDPRSSVA	278	20	7.6e-180	0.933	/data/input/nr_20241120.dmnd																			MHYT domain-containing protein [Rhodococcus ruber]	Rhodococcus ruber	7.6e-180	278	278	1	278	1	278	278	1	1	1	1	0		WP_040782328	506
ENBDON_00012	MHYT domain-containing protein	MDTHVHLFGMGTWVLVLAYVTATIGLLVGLASARKSLTAGSERSRLYWLMRAALSTGGVGVWLAHFLPMAGFTVDGSIIRYDLPGIVFSMAVALVSAFVAMVVVQPKRMSRRARPSRGAAAVRLLGGSLVLGAGIAGVHYSIMWAMELQGTVAYDTTYVAVSVVAAWLTAVVILWLVTVADRRWMRIVGSIVAGAAVIGVHFLAMAAVRVTVDSSTAAPSGVEVFAVLFPVFVLGMLILTVPIMALLMAPDRVAAALEAEAEAWAQEHRPIDPRSSVA	278	20	7.6e-180	0.933	/data/input/nr_20241120.dmnd																			MHYT domain-containing protein [Rhodococcus ruber]	Rhodococcus ruber	7.6e-180	278	278	1	278	1	278	278	1	1	1	1	0		WP_040782328	506
ENBDON_00012	MHYT domain-containing protein	MDTHVHLFGMGTWVLVLAYVTATIGLLVGLASARKSLTAGSERSRLYWLMRAALSTGGVGVWLAHFLPMAGFTVDGSIIRYDLPGIVFSMAVALVSAFVAMVVVQPKRMSRRARPSRGAAAVRLLGGSLVLGAGIAGVHYSIMWAMELQGTVAYDTTYVAVSVVAAWLTAVVILWLVTVADRRWMRIVGSIVAGAAVIGVHFLAMAAVRVTVDSSTAAPSGVEVFAVLFPVFVLGMLILTVPIMALLMAPDRVAAALEAEAEAWAQEHRPIDPRSSVA	278	20	7.6e-180	0.933	/data/input/nr_20241120.dmnd																			MHYT domain-containing protein [Rhodococcus ruber]	Rhodococcus ruber	7.6e-180	278	278	1	278	1	278	278	1	1	1	1	0		WP_040782328	506
ENBDON_00012	MHYT domain-containing protein	MDTHVHLFGMGTWVLVLAYVTATIGLLVGLASARKSLTAGSERSRLYWLMRAALSTGGVGVWLAHFLPMAGFTVDGSIIRYDLPGIVFSMAVALVSAFVAMVVVQPKRMSRRARPSRGAAAVRLLGGSLVLGAGIAGVHYSIMWAMELQGTVAYDTTYVAVSVVAAWLTAVVILWLVTVADRRWMRIVGSIVAGAAVIGVHFLAMAAVRVTVDSSTAAPSGVEVFAVLFPVFVLGMLILTVPIMALLMAPDRVAAALEAEAEAWAQEHRPIDPRSSVA	278	20	7.6e-180	0.933	/data/input/nr_20241120.dmnd																			MHYT domain-containing protein [Rhodococcus ruber]	Rhodococcus ruber	7.6e-180	278	278	1	278	1	278	278	1	1	1	1	0		WP_040782328	506
ENBDON_00012	MHYT domain-containing protein	MDTHVHLFGMGTWVLVLAYVTATIGLLVGLASARKSLTAGSERSRLYWLMRAALSTGGVGVWLAHFLPMAGFTVDGSIIRYDLPGIVFSMAVALVSAFVAMVVVQPKRMSRRARPSRGAAAVRLLGGSLVLGAGIAGVHYSIMWAMELQGTVAYDTTYVAVSVVAAWLTAVVILWLVTVADRRWMRIVGSIVAGAAVIGVHFLAMAAVRVTVDSSTAAPSGVEVFAVLFPVFVLGMLILTVPIMALLMAPDRVAAALEAEAEAWAQEHRPIDPRSSVA	278	20	7.6e-180	0.933	/data/input/nr_20241120.dmnd																			MHYT domain-containing protein [Rhodococcus ruber]	Rhodococcus ruber	7.6e-180	278	278	1	278	1	278	278	1	1	1	1	0		WP_040782328	506
ENBDON_00013	MHYT domain-containing protein	MSHEMHHFSMGMWVFFLACATSVVGSFVGLSCARQSLTAPTARGHRRWMAMAALSVGGVAVWLMHFIGMMGFDIPGTAIRYALGPTAFSVALSVAATWFGLWLVSSRASWVNRVPSLARLLVGGLGMGLAVSLMHYSGMWAIRIQGSLEHDPSFVVASVAIGVVAATAALWLAQTADRWVLRVPAALLMGCAVVALHYTGMAGVRVEVDPTVPLPSGRTVTALLFPSFVLGIAVLAVPIAALLLAPSRGDMALEEEFARWATDDDASVPGRS	272	20	5.7e-188	0.9623	/data/input/nr_20241120.dmnd	MHYT domain-containing protein [Rhodococcus indonesiensis]	Rhodococcus indonesiensis	5.7e-188	272	272	1	272	1	272	271	0.9963	1	1	1	0		MDM7489171	526	MHYT domain-containing protein [Rhodococcus indonesiensis]	Rhodococcus indonesiensis	5.7e-188	272	272	1	272	1	272	271	0.9963	1	1	1	0		MDM7489171	526	RHRU231_590020	1830	WP_017681012		GO:0016020-IEA	membrane-IEA
ENBDON_00013	MHYT domain-containing protein	MSHEMHHFSMGMWVFFLACATSVVGSFVGLSCARQSLTAPTARGHRRWMAMAALSVGGVAVWLMHFIGMMGFDIPGTAIRYALGPTAFSVALSVAATWFGLWLVSSRASWVNRVPSLARLLVGGLGMGLAVSLMHYSGMWAIRIQGSLEHDPSFVVASVAIGVVAATAALWLAQTADRWVLRVPAALLMGCAVVALHYTGMAGVRVEVDPTVPLPSGRTVTALLFPSFVLGIAVLAVPIAALLLAPSRGDMALEEEFARWATDDDASVPGRS	272	20	5.7e-188	0.9623	/data/input/nr_20241120.dmnd	MHYT domain-containing protein [Rhodococcus ruber]	Rhodococcus ruber	8.1e-188	272	272	1	272	1	272	271	0.9963	1	1	1	0		WP_235157307	526	MHYT domain-containing protein [Rhodococcus indonesiensis]	Rhodococcus indonesiensis	5.7e-188	272	272	1	272	1	272	271	0.9963	1	1	1	0		MDM7489171	526	OCS65_01165	191292	WP_050034258
ENBDON_00013	MHYT domain-containing protein	MSHEMHHFSMGMWVFFLACATSVVGSFVGLSCARQSLTAPTARGHRRWMAMAALSVGGVAVWLMHFIGMMGFDIPGTAIRYALGPTAFSVALSVAATWFGLWLVSSRASWVNRVPSLARLLVGGLGMGLAVSLMHYSGMWAIRIQGSLEHDPSFVVASVAIGVVAATAALWLAQTADRWVLRVPAALLMGCAVVALHYTGMAGVRVEVDPTVPLPSGRTVTALLFPSFVLGIAVLAVPIAALLLAPSRGDMALEEEFARWATDDDASVPGRS	272	20	5.7e-188	0.9623	/data/input/nr_20241120.dmnd	MHYT domain-containing protein [Rhodococcus rhodochrous]	Rhodococcus rhodochrous	1.6e-187	272	272	1	272	1	272	271	0.9963	1	1	1	0		WP_238586161	525	MHYT domain-containing protein [Rhodococcus indonesiensis]	Rhodococcus indonesiensis	5.7e-188	272	272	1	272	1	272	271	0.9963	1	1	1	0		MDM7489171	526	G352_12704	1278076	EME64442
ENBDON_00013	MHYT domain-containing protein	MSHEMHHFSMGMWVFFLACATSVVGSFVGLSCARQSLTAPTARGHRRWMAMAALSVGGVAVWLMHFIGMMGFDIPGTAIRYALGPTAFSVALSVAATWFGLWLVSSRASWVNRVPSLARLLVGGLGMGLAVSLMHYSGMWAIRIQGSLEHDPSFVVASVAIGVVAATAALWLAQTADRWVLRVPAALLMGCAVVALHYTGMAGVRVEVDPTVPLPSGRTVTALLFPSFVLGIAVLAVPIAALLLAPSRGDMALEEEFARWATDDDASVPGRS	272	20	5.7e-188	0.9623	/data/input/nr_20241120.dmnd	hypothetical protein G352_12704 [Rhodococcus ruber BKS 20-38]	Rhodococcus ruber BKS 20-38	2.7e-187	305	272	34	305	1	272	271	0.9963	0.8918	1	1	0		EME64442	526	MHYT domain-containing protein [Rhodococcus indonesiensis]	Rhodococcus indonesiensis	5.7e-188	272	272	1	272	1	272	271	0.9963	1	1	1	0		MDM7489171	526	Z051_00475	1441923	KOS58094
ENBDON_00013	MHYT domain-containing protein	MSHEMHHFSMGMWVFFLACATSVVGSFVGLSCARQSLTAPTARGHRRWMAMAALSVGGVAVWLMHFIGMMGFDIPGTAIRYALGPTAFSVALSVAATWFGLWLVSSRASWVNRVPSLARLLVGGLGMGLAVSLMHYSGMWAIRIQGSLEHDPSFVVASVAIGVVAATAALWLAQTADRWVLRVPAALLMGCAVVALHYTGMAGVRVEVDPTVPLPSGRTVTALLFPSFVLGIAVLAVPIAALLLAPSRGDMALEEEFARWATDDDASVPGRS	272	20	5.7e-188	0.9623	/data/input/nr_20241120.dmnd	signal protein [Rhodococcus rhodochrous KG-21]	Rhodococcus rhodochrous KG-21	6.6e-187	310	272	39	310	1	272	271	0.9963	0.8774	1	1	0		KOS58094	525	MHYT domain-containing protein [Rhodococcus indonesiensis]	Rhodococcus indonesiensis	5.7e-188	272	272	1	272	1	272	271	0.9963	1	1	1	0		MDM7489171	526	HFP48_00070	2722825	WP_006934482
ENBDON_00013	MHYT domain-containing protein	MSHEMHHFSMGMWVFFLACATSVVGSFVGLSCARQSLTAPTARGHRRWMAMAALSVGGVAVWLMHFIGMMGFDIPGTAIRYALGPTAFSVALSVAATWFGLWLVSSRASWVNRVPSLARLLVGGLGMGLAVSLMHYSGMWAIRIQGSLEHDPSFVVASVAIGVVAATAALWLAQTADRWVLRVPAALLMGCAVVALHYTGMAGVRVEVDPTVPLPSGRTVTALLFPSFVLGIAVLAVPIAALLLAPSRGDMALEEEFARWATDDDASVPGRS	272	20	5.7e-188	0.9623	/data/input/nr_20241120.dmnd	MHYT domain-containing protein [Rhodococcus ruber]/MBP2214178.1 NO-binding membrane sensor protein with MHYT domain [Rhodococcus ruber]	Rhodococcus ruber/Rhodococcus ruber	5.2e-184	272	272	1	272	1	272	267	0.9816	1	1	1	0		WP_225223005	516	MHYT domain-containing protein [Rhodococcus indonesiensis]	Rhodococcus indonesiensis	5.7e-188	272	272	1	272	1	272	271	0.9963	1	1	1	0		MDM7489171	526
ENBDON_00013	MHYT domain-containing protein	MSHEMHHFSMGMWVFFLACATSVVGSFVGLSCARQSLTAPTARGHRRWMAMAALSVGGVAVWLMHFIGMMGFDIPGTAIRYALGPTAFSVALSVAATWFGLWLVSSRASWVNRVPSLARLLVGGLGMGLAVSLMHYSGMWAIRIQGSLEHDPSFVVASVAIGVVAATAALWLAQTADRWVLRVPAALLMGCAVVALHYTGMAGVRVEVDPTVPLPSGRTVTALLFPSFVLGIAVLAVPIAALLLAPSRGDMALEEEFARWATDDDASVPGRS	272	20	5.7e-188	0.9623	/data/input/nr_20241120.dmnd	hypothetical protein YT1_0016 [Rhodococcus ruber]	Rhodococcus ruber	1.5e-183	272	272	1	272	1	272	267	0.9816	1	1	1	0		AXY49476	515	MHYT domain-containing protein [Rhodococcus indonesiensis]	Rhodococcus indonesiensis	5.7e-188	272	272	1	272	1	272	271	0.9963	1	1	1	0		MDM7489171	526
ENBDON_00013	MHYT domain-containing protein	MSHEMHHFSMGMWVFFLACATSVVGSFVGLSCARQSLTAPTARGHRRWMAMAALSVGGVAVWLMHFIGMMGFDIPGTAIRYALGPTAFSVALSVAATWFGLWLVSSRASWVNRVPSLARLLVGGLGMGLAVSLMHYSGMWAIRIQGSLEHDPSFVVASVAIGVVAATAALWLAQTADRWVLRVPAALLMGCAVVALHYTGMAGVRVEVDPTVPLPSGRTVTALLFPSFVLGIAVLAVPIAALLLAPSRGDMALEEEFARWATDDDASVPGRS	272	20	5.7e-188	0.9623	/data/input/nr_20241120.dmnd	MULTISPECIES: MHYT domain-containing protein [Rhodococcus]/MDO2379405.1 MHYT domain-containing protein [Rhodococcus ruber]/RIK10846.1 MAG: signal protein [Acidobacteriota bacterium]/AUM19143.1 signal protein [Rhodococcus ruber]/AWG97097.1 signal protein [Rhodococcus ruber]/KXF85743.1 signal protein [Rhodococcus ruber Chol-4]	Rhodococcus/Rhodococcus ruber/Acidobacteriota bacterium/Rhodococcus ruber/Rhodococcus ruber/Rhodococcus ruber Chol-4	2.1e-183	310	272	39	310	1	272	267	0.9816	0.8774	1	1	0		WP_017681012/WP_017681012/WP_017681012/WP_017681012	516	MHYT domain-containing protein [Rhodococcus indonesiensis]	Rhodococcus indonesiensis	5.7e-188	272	272	1	272	1	272	271	0.9963	1	1	1	0		MDM7489171	526
ENBDON_00013	MHYT domain-containing protein	MSHEMHHFSMGMWVFFLACATSVVGSFVGLSCARQSLTAPTARGHRRWMAMAALSVGGVAVWLMHFIGMMGFDIPGTAIRYALGPTAFSVALSVAATWFGLWLVSSRASWVNRVPSLARLLVGGLGMGLAVSLMHYSGMWAIRIQGSLEHDPSFVVASVAIGVVAATAALWLAQTADRWVLRVPAALLMGCAVVALHYTGMAGVRVEVDPTVPLPSGRTVTALLFPSFVLGIAVLAVPIAALLLAPSRGDMALEEEFARWATDDDASVPGRS	272	20	5.7e-188	0.9623	/data/input/nr_20241120.dmnd	MULTISPECIES: MHYT domain-containing protein [Rhodococcus]/ATQ30122.1 signal protein [Rhodococcus ruber]	Rhodococcus/Rhodococcus ruber	4.2e-183	310	272	39	310	1	272	267	0.9816	0.8774	1	1	0		WP_010595452/WP_010595452	516	MHYT domain-containing protein [Rhodococcus indonesiensis]	Rhodococcus indonesiensis	5.7e-188	272	272	1	272	1	272	271	0.9963	1	1	1	0		MDM7489171	526
ENBDON_00013	MHYT domain-containing protein	MSHEMHHFSMGMWVFFLACATSVVGSFVGLSCARQSLTAPTARGHRRWMAMAALSVGGVAVWLMHFIGMMGFDIPGTAIRYALGPTAFSVALSVAATWFGLWLVSSRASWVNRVPSLARLLVGGLGMGLAVSLMHYSGMWAIRIQGSLEHDPSFVVASVAIGVVAATAALWLAQTADRWVLRVPAALLMGCAVVALHYTGMAGVRVEVDPTVPLPSGRTVTALLFPSFVLGIAVLAVPIAALLLAPSRGDMALEEEFARWATDDDASVPGRS	272	20	5.7e-188	0.9623	/data/input/nr_20241120.dmnd	MULTISPECIES: MHYT domain-containing protein [Rhodococcus]/UQB72915.1 signal protein [Rhodococcus ruber]/WKK10995.1 MHYT domain-containing protein [Rhodococcus ruber]/WML62806.1 MHYT domain-containing protein [Rhodococcus sp. AH-ZY2]	Rhodococcus/Rhodococcus ruber/Rhodococcus ruber/Rhodococcus sp. AH-ZY2	6e-183	310	272	39	310	1	272	267	0.9816	0.8774	1	1	0		WP_119699206/WP_119699206/WP_119699206	515	MHYT domain-containing protein [Rhodococcus indonesiensis]	Rhodococcus indonesiensis	5.7e-188	272	272	1	272	1	272	271	0.9963	1	1	1	0		MDM7489171	526
ENBDON_00013	MHYT domain-containing protein	MSHEMHHFSMGMWVFFLACATSVVGSFVGLSCARQSLTAPTARGHRRWMAMAALSVGGVAVWLMHFIGMMGFDIPGTAIRYALGPTAFSVALSVAATWFGLWLVSSRASWVNRVPSLARLLVGGLGMGLAVSLMHYSGMWAIRIQGSLEHDPSFVVASVAIGVVAATAALWLAQTADRWVLRVPAALLMGCAVVALHYTGMAGVRVEVDPTVPLPSGRTVTALLFPSFVLGIAVLAVPIAALLLAPSRGDMALEEEFARWATDDDASVPGRS	272	20	5.7e-188	0.9623	/data/input/nr_20241120.dmnd	MHYT domain-containing protein [Rhodococcus ruber]/RQM33785.1 signal protein [Rhodococcus ruber]	Rhodococcus ruber/Rhodococcus ruber	6e-183	310	272	39	310	1	272	266	0.9779	0.8774	1	1	0		WP_124258889	515	MHYT domain-containing protein [Rhodococcus indonesiensis]	Rhodococcus indonesiensis	5.7e-188	272	272	1	272	1	272	271	0.9963	1	1	1	0		MDM7489171	526
ENBDON_00013	MHYT domain-containing protein	MSHEMHHFSMGMWVFFLACATSVVGSFVGLSCARQSLTAPTARGHRRWMAMAALSVGGVAVWLMHFIGMMGFDIPGTAIRYALGPTAFSVALSVAATWFGLWLVSSRASWVNRVPSLARLLVGGLGMGLAVSLMHYSGMWAIRIQGSLEHDPSFVVASVAIGVVAATAALWLAQTADRWVLRVPAALLMGCAVVALHYTGMAGVRVEVDPTVPLPSGRTVTALLFPSFVLGIAVLAVPIAALLLAPSRGDMALEEEFARWATDDDASVPGRS	272	20	5.7e-188	0.9623	/data/input/nr_20241120.dmnd	signal protein [Rhodococcus sp. (in: high G+C Gram-positive bacteria)]	Rhodococcus sp. (in: high G+C Gram-positive bacteria)	8.6e-183	310	272	39	310	1	272	267	0.9816	0.8774	1	1	0		MDX5452954	515	MHYT domain-containing protein [Rhodococcus indonesiensis]	Rhodococcus indonesiensis	5.7e-188	272	272	1	272	1	272	271	0.9963	1	1	1	0		MDM7489171	526
ENBDON_00013	MHYT domain-containing protein	MSHEMHHFSMGMWVFFLACATSVVGSFVGLSCARQSLTAPTARGHRRWMAMAALSVGGVAVWLMHFIGMMGFDIPGTAIRYALGPTAFSVALSVAATWFGLWLVSSRASWVNRVPSLARLLVGGLGMGLAVSLMHYSGMWAIRIQGSLEHDPSFVVASVAIGVVAATAALWLAQTADRWVLRVPAALLMGCAVVALHYTGMAGVRVEVDPTVPLPSGRTVTALLFPSFVLGIAVLAVPIAALLLAPSRGDMALEEEFARWATDDDASVPGRS	272	20	5.7e-188	0.9623	/data/input/nr_20241120.dmnd	MHYT domain-containing protein [Rhodococcus aetherivorans]/KDE11429.1 signal protein [Rhodococcus aetherivorans]/MDV6293295.1 MHYT domain-containing protein [Rhodococcus aetherivorans]	Rhodococcus aetherivorans/Rhodococcus aetherivorans/Rhodococcus aetherivorans	3.8e-169	277	277	1	277	1	272	256	0.9242	1	1.0184	1	0		WP_029546810	479	MHYT domain-containing protein [Rhodococcus indonesiensis]	Rhodococcus indonesiensis	5.7e-188	272	272	1	272	1	272	271	0.9963	1	1	1	0		MDM7489171	526
ENBDON_00013	MHYT domain-containing protein	MSHEMHHFSMGMWVFFLACATSVVGSFVGLSCARQSLTAPTARGHRRWMAMAALSVGGVAVWLMHFIGMMGFDIPGTAIRYALGPTAFSVALSVAATWFGLWLVSSRASWVNRVPSLARLLVGGLGMGLAVSLMHYSGMWAIRIQGSLEHDPSFVVASVAIGVVAATAALWLAQTADRWVLRVPAALLMGCAVVALHYTGMAGVRVEVDPTVPLPSGRTVTALLFPSFVLGIAVLAVPIAALLLAPSRGDMALEEEFARWATDDDASVPGRS	272	20	5.7e-188	0.9623	/data/input/nr_20241120.dmnd	MULTISPECIES: MHYT domain-containing protein [Rhodococcus]/ETT26596.1 putative integral membrane sensor protein [Rhodococcus rhodochrous ATCC 21198]/ANZ27470.1 signal protein [Rhodococcus sp. WB1]/NGP25223.1 signal protein [Rhodococcus aetherivorans]/OLL19891.1 signal protein [Rhodococcus sp. M8]/QIX48132.1 signal protein [Rhodococcus sp. DMU1]	Rhodococcus/Rhodococcus rhodochrous ATCC 21198/Rhodococcus sp. WB1/Rhodococcus aetherivorans/Rhodococcus sp. M8/Rhodococcus sp. DMU1	1.1e-168	277	277	1	277	1	272	256	0.9242	1	1.0184	1	0		WP_006934482/WP_006934482/WP_006934482/WP_006934482/WP_006934482/WP_006934482	478	MHYT domain-containing protein [Rhodococcus indonesiensis]	Rhodococcus indonesiensis	5.7e-188	272	272	1	272	1	272	271	0.9963	1	1	1	0		MDM7489171	526
ENBDON_00013	MHYT domain-containing protein	MSHEMHHFSMGMWVFFLACATSVVGSFVGLSCARQSLTAPTARGHRRWMAMAALSVGGVAVWLMHFIGMMGFDIPGTAIRYALGPTAFSVALSVAATWFGLWLVSSRASWVNRVPSLARLLVGGLGMGLAVSLMHYSGMWAIRIQGSLEHDPSFVVASVAIGVVAATAALWLAQTADRWVLRVPAALLMGCAVVALHYTGMAGVRVEVDPTVPLPSGRTVTALLFPSFVLGIAVLAVPIAALLLAPSRGDMALEEEFARWATDDDASVPGRS	272	20	5.7e-188	0.9623	/data/input/nr_20241120.dmnd	signal protein [Rhodococcus rhodochrous]	Rhodococcus rhodochrous	1.1e-168	277	277	1	277	1	272	256	0.9242	1	1.0184	1	0		OOL29695	478	MHYT domain-containing protein [Rhodococcus indonesiensis]	Rhodococcus indonesiensis	5.7e-188	272	272	1	272	1	272	271	0.9963	1	1	1	0		MDM7489171	526
ENBDON_00013	MHYT domain-containing protein	MSHEMHHFSMGMWVFFLACATSVVGSFVGLSCARQSLTAPTARGHRRWMAMAALSVGGVAVWLMHFIGMMGFDIPGTAIRYALGPTAFSVALSVAATWFGLWLVSSRASWVNRVPSLARLLVGGLGMGLAVSLMHYSGMWAIRIQGSLEHDPSFVVASVAIGVVAATAALWLAQTADRWVLRVPAALLMGCAVVALHYTGMAGVRVEVDPTVPLPSGRTVTALLFPSFVLGIAVLAVPIAALLLAPSRGDMALEEEFARWATDDDASVPGRS	272	20	5.7e-188	0.9623	/data/input/nr_20241120.dmnd	MHYT domain-containing protein [Rhodococcus aetherivorans]/AKE87892.1 signal protein [Rhodococcus aetherivorans]/UYF94417.1 signal protein [Rhodococcus aetherivorans]/WFS11843.1 MHYT domain-containing protein [Rhodococcus aetherivorans]	Rhodococcus aetherivorans/Rhodococcus aetherivorans/Rhodococcus aetherivorans/Rhodococcus aetherivorans	3e-168	276	276	1	276	1	272	257	0.9312	1	1.0147	1	0		WP_050034258	477	MHYT domain-containing protein [Rhodococcus indonesiensis]	Rhodococcus indonesiensis	5.7e-188	272	272	1	272	1	272	271	0.9963	1	1	1	0		MDM7489171	526
ENBDON_00013	MHYT domain-containing protein	MSHEMHHFSMGMWVFFLACATSVVGSFVGLSCARQSLTAPTARGHRRWMAMAALSVGGVAVWLMHFIGMMGFDIPGTAIRYALGPTAFSVALSVAATWFGLWLVSSRASWVNRVPSLARLLVGGLGMGLAVSLMHYSGMWAIRIQGSLEHDPSFVVASVAIGVVAATAALWLAQTADRWVLRVPAALLMGCAVVALHYTGMAGVRVEVDPTVPLPSGRTVTALLFPSFVLGIAVLAVPIAALLLAPSRGDMALEEEFARWATDDDASVPGRS	272	20	5.7e-188	0.9623	/data/input/nr_20241120.dmnd	MHYT domain-containing protein [Rhodococcus sp. 14C212]/NGP05626.1 signal protein [Rhodococcus sp. 14C212]	Rhodococcus sp. 14C212/Rhodococcus sp. 14C212	3.1e-168	277	277	1	277	1	272	256	0.9242	1	1.0184	1	0		WP_165037348	477	MHYT domain-containing protein [Rhodococcus indonesiensis]	Rhodococcus indonesiensis	5.7e-188	272	272	1	272	1	272	271	0.9963	1	1	1	0		MDM7489171	526
ENBDON_00013	MHYT domain-containing protein	MSHEMHHFSMGMWVFFLACATSVVGSFVGLSCARQSLTAPTARGHRRWMAMAALSVGGVAVWLMHFIGMMGFDIPGTAIRYALGPTAFSVALSVAATWFGLWLVSSRASWVNRVPSLARLLVGGLGMGLAVSLMHYSGMWAIRIQGSLEHDPSFVVASVAIGVVAATAALWLAQTADRWVLRVPAALLMGCAVVALHYTGMAGVRVEVDPTVPLPSGRTVTALLFPSFVLGIAVLAVPIAALLLAPSRGDMALEEEFARWATDDDASVPGRS	272	20	5.7e-188	0.9623	/data/input/nr_20241120.dmnd	hypothetical protein [Rhodococcus sp. YH1]	Rhodococcus sp. YH1	4.4e-168	277	277	1	277	1	272	255	0.9206	1	1.0184	1	0		NCL77097	476	MHYT domain-containing protein [Rhodococcus indonesiensis]	Rhodococcus indonesiensis	5.7e-188	272	272	1	272	1	272	271	0.9963	1	1	1	0		MDM7489171	526
ENBDON_00013	MHYT domain-containing protein	MSHEMHHFSMGMWVFFLACATSVVGSFVGLSCARQSLTAPTARGHRRWMAMAALSVGGVAVWLMHFIGMMGFDIPGTAIRYALGPTAFSVALSVAATWFGLWLVSSRASWVNRVPSLARLLVGGLGMGLAVSLMHYSGMWAIRIQGSLEHDPSFVVASVAIGVVAATAALWLAQTADRWVLRVPAALLMGCAVVALHYTGMAGVRVEVDPTVPLPSGRTVTALLFPSFVLGIAVLAVPIAALLLAPSRGDMALEEEFARWATDDDASVPGRS	272	20	5.7e-188	0.9623	/data/input/nr_20241120.dmnd	MHYT domain-containing protein [Rhodococcus sp. ENV425]/PND49923.1 signal protein [Rhodococcus sp. ENV425]	Rhodococcus sp. ENV425/Rhodococcus sp. ENV425	6.3e-168	277	277	1	277	1	272	255	0.9206	1	1.0184	1	0		WP_102800334	476	MHYT domain-containing protein [Rhodococcus indonesiensis]	Rhodococcus indonesiensis	5.7e-188	272	272	1	272	1	272	271	0.9963	1	1	1	0		MDM7489171	526
ENBDON_00013	MHYT domain-containing protein	MSHEMHHFSMGMWVFFLACATSVVGSFVGLSCARQSLTAPTARGHRRWMAMAALSVGGVAVWLMHFIGMMGFDIPGTAIRYALGPTAFSVALSVAATWFGLWLVSSRASWVNRVPSLARLLVGGLGMGLAVSLMHYSGMWAIRIQGSLEHDPSFVVASVAIGVVAATAALWLAQTADRWVLRVPAALLMGCAVVALHYTGMAGVRVEVDPTVPLPSGRTVTALLFPSFVLGIAVLAVPIAALLLAPSRGDMALEEEFARWATDDDASVPGRS	272	20	5.7e-188	0.9623	/data/input/nr_20241120.dmnd	MULTISPECIES: MHYT domain-containing protein [Rhodococcus]/MBC2590279.1 signal protein [Rhodococcus aetherivorans]/QRI76802.1 signal protein [Rhodococcus aetherivorans]/QSE60220.1 signal protein [Rhodococcus sp. PSBB066]/QSE68475.1 signal protein [Rhodococcus sp. PSBB049]	Rhodococcus/Rhodococcus aetherivorans/Rhodococcus aetherivorans/Rhodococcus sp. PSBB066/Rhodococcus sp. PSBB049	3.5e-167	276	276	1	276	1	272	256	0.9275	1	1.0147	1	0		WP_185713366/WP_185713366/WP_185713366/WP_185713366	474	MHYT domain-containing protein [Rhodococcus indonesiensis]	Rhodococcus indonesiensis	5.7e-188	272	272	1	272	1	272	271	0.9963	1	1	1	0		MDM7489171	526
ENBDON_00013	MHYT domain-containing protein	MSHEMHHFSMGMWVFFLACATSVVGSFVGLSCARQSLTAPTARGHRRWMAMAALSVGGVAVWLMHFIGMMGFDIPGTAIRYALGPTAFSVALSVAATWFGLWLVSSRASWVNRVPSLARLLVGGLGMGLAVSLMHYSGMWAIRIQGSLEHDPSFVVASVAIGVVAATAALWLAQTADRWVLRVPAALLMGCAVVALHYTGMAGVRVEVDPTVPLPSGRTVTALLFPSFVLGIAVLAVPIAALLLAPSRGDMALEEEFARWATDDDASVPGRS	272	20	5.7e-188	0.9623	/data/input/nr_20241120.dmnd																			MHYT domain-containing protein [Rhodococcus indonesiensis]	Rhodococcus indonesiensis	5.7e-188	272	272	1	272	1	272	271	0.9963	1	1	1	0		MDM7489171	526
ENBDON_00013	MHYT domain-containing protein	MSHEMHHFSMGMWVFFLACATSVVGSFVGLSCARQSLTAPTARGHRRWMAMAALSVGGVAVWLMHFIGMMGFDIPGTAIRYALGPTAFSVALSVAATWFGLWLVSSRASWVNRVPSLARLLVGGLGMGLAVSLMHYSGMWAIRIQGSLEHDPSFVVASVAIGVVAATAALWLAQTADRWVLRVPAALLMGCAVVALHYTGMAGVRVEVDPTVPLPSGRTVTALLFPSFVLGIAVLAVPIAALLLAPSRGDMALEEEFARWATDDDASVPGRS	272	20	5.7e-188	0.9623	/data/input/nr_20241120.dmnd																			MHYT domain-containing protein [Rhodococcus indonesiensis]	Rhodococcus indonesiensis	5.7e-188	272	272	1	272	1	272	271	0.9963	1	1	1	0		MDM7489171	526
ENBDON_00013	MHYT domain-containing protein	MSHEMHHFSMGMWVFFLACATSVVGSFVGLSCARQSLTAPTARGHRRWMAMAALSVGGVAVWLMHFIGMMGFDIPGTAIRYALGPTAFSVALSVAATWFGLWLVSSRASWVNRVPSLARLLVGGLGMGLAVSLMHYSGMWAIRIQGSLEHDPSFVVASVAIGVVAATAALWLAQTADRWVLRVPAALLMGCAVVALHYTGMAGVRVEVDPTVPLPSGRTVTALLFPSFVLGIAVLAVPIAALLLAPSRGDMALEEEFARWATDDDASVPGRS	272	20	5.7e-188	0.9623	/data/input/nr_20241120.dmnd																			MHYT domain-containing protein [Rhodococcus indonesiensis]	Rhodococcus indonesiensis	5.7e-188	272	272	1	272	1	272	271	0.9963	1	1	1	0		MDM7489171	526
ENBDON_00013	MHYT domain-containing protein	MSHEMHHFSMGMWVFFLACATSVVGSFVGLSCARQSLTAPTARGHRRWMAMAALSVGGVAVWLMHFIGMMGFDIPGTAIRYALGPTAFSVALSVAATWFGLWLVSSRASWVNRVPSLARLLVGGLGMGLAVSLMHYSGMWAIRIQGSLEHDPSFVVASVAIGVVAATAALWLAQTADRWVLRVPAALLMGCAVVALHYTGMAGVRVEVDPTVPLPSGRTVTALLFPSFVLGIAVLAVPIAALLLAPSRGDMALEEEFARWATDDDASVPGRS	272	20	5.7e-188	0.9623	/data/input/nr_20241120.dmnd																			MHYT domain-containing protein [Rhodococcus indonesiensis]	Rhodococcus indonesiensis	5.7e-188	272	272	1	272	1	272	271	0.9963	1	1	1	0		MDM7489171	526
ENBDON_00013	MHYT domain-containing protein	MSHEMHHFSMGMWVFFLACATSVVGSFVGLSCARQSLTAPTARGHRRWMAMAALSVGGVAVWLMHFIGMMGFDIPGTAIRYALGPTAFSVALSVAATWFGLWLVSSRASWVNRVPSLARLLVGGLGMGLAVSLMHYSGMWAIRIQGSLEHDPSFVVASVAIGVVAATAALWLAQTADRWVLRVPAALLMGCAVVALHYTGMAGVRVEVDPTVPLPSGRTVTALLFPSFVLGIAVLAVPIAALLLAPSRGDMALEEEFARWATDDDASVPGRS	272	20	5.7e-188	0.9623	/data/input/nr_20241120.dmnd																			MHYT domain-containing protein [Rhodococcus indonesiensis]	Rhodococcus indonesiensis	5.7e-188	272	272	1	272	1	272	271	0.9963	1	1	1	0		MDM7489171	526
ENBDON_00013	MHYT domain-containing protein	MSHEMHHFSMGMWVFFLACATSVVGSFVGLSCARQSLTAPTARGHRRWMAMAALSVGGVAVWLMHFIGMMGFDIPGTAIRYALGPTAFSVALSVAATWFGLWLVSSRASWVNRVPSLARLLVGGLGMGLAVSLMHYSGMWAIRIQGSLEHDPSFVVASVAIGVVAATAALWLAQTADRWVLRVPAALLMGCAVVALHYTGMAGVRVEVDPTVPLPSGRTVTALLFPSFVLGIAVLAVPIAALLLAPSRGDMALEEEFARWATDDDASVPGRS	272	20	5.7e-188	0.9623	/data/input/nr_20241120.dmnd																			MHYT domain-containing protein [Rhodococcus indonesiensis]	Rhodococcus indonesiensis	5.7e-188	272	272	1	272	1	272	271	0.9963	1	1	1	0		MDM7489171	526
ENBDON_00014	MULTISPECIES: intein-containing DNA gyrase subunit A	MTDTTLPPEGPGHDRIEPVDIQQEMQSSYIDYAMSVIVGRALPDVRDGLKPVHRRVLYAMYDNGFRPDRGYVKSARAVAETMGNYHPHGDASIYDTLVRLAQPWSMRYPLVDGQGNFGSRGNDGAAAMRYCVPGDTLVRMPHGQSIRISEILPGVEPDSDNEIDLKVLDRHGNPVMAEMLFHSGTHRTYTLSTVEGYEMRGTANHPVLCLVDVAGVPTLLWKLLDEIRSGDRVVLQRVPSAEEHGRHNEYEAAAALLLGAFVSEGFVSENRAGFNNLDRDFFDRVVDAFDRVVGGRRYVYSRVSKSGSTLHELDVQDLTMLRRSVLADVIGQRSDHKSVPDFIWESPTPLKRIFLGALFEGDGSCSSLPRNTVQVSYSTRSMQLAKDVQQLLLEFGVVS…	1261	20	0	0.9414	/data/input/nr_20241120.dmnd	MULTISPECIES: intein-containing DNA gyrase subunit A [Rhodococcus]/EME64441.1 DNA gyrase subunit A [Rhodococcus ruber BKS 20-38]/MDM7489172.1 intein-containing DNA gyrase subunit A [Rhodococcus indonesiensis]	Rhodococcus/Rhodococcus ruber BKS 20-38/Rhodococcus indonesiensis	0	1261	1261	1	1261	1	1261	1260	0.9992	1	1	1	0		WP_003936632/WP_003936632/WP_003936632	2448	EME64441.1 DNA gyrase subunit A [Rhodococcus ruber BKS 20-38]/MDM7489172.1 intein-containing DNA gyrase subunit A [Rhodococcus indonesiensis]/MULTISPECIES: intein-containing DNA gyrase subunit A [Rhodococcus]	Rhodococcus/Rhodococcus indonesiensis/Rhodococcus ruber BKS 20-38	0	1261	1261	1	1261	1	1261	1260	0.9992	1	1	1	0		WP_003936632;WP_003936632;WP_003936632	2448	G352_12699	1278076	WP_003936632		GO:0003677-IEA	DNA binding-IEA
ENBDON_00014	MULTISPECIES: intein-containing DNA gyrase subunit A	MTDTTLPPEGPGHDRIEPVDIQQEMQSSYIDYAMSVIVGRALPDVRDGLKPVHRRVLYAMYDNGFRPDRGYVKSARAVAETMGNYHPHGDASIYDTLVRLAQPWSMRYPLVDGQGNFGSRGNDGAAAMRYCVPGDTLVRMPHGQSIRISEILPGVEPDSDNEIDLKVLDRHGNPVMAEMLFHSGTHRTYTLSTVEGYEMRGTANHPVLCLVDVAGVPTLLWKLLDEIRSGDRVVLQRVPSAEEHGRHNEYEAAAALLLGAFVSEGFVSENRAGFNNLDRDFFDRVVDAFDRVVGGRRYVYSRVSKSGSTLHELDVQDLTMLRRSVLADVIGQRSDHKSVPDFIWESPTPLKRIFLGALFEGDGSCSSLPRNTVQVSYSTRSMQLAKDVQQLLLEFGVVS…	1261	20	0	0.9414	/data/input/nr_20241120.dmnd	MULTISPECIES: intein-containing DNA gyrase subunit A [Rhodococcus]/MDO2379406.1 intein-containing DNA gyrase subunit A [Rhodococcus ruber]/MCD2125303.1 intein-containing DNA gyrase subunit A [Rhodococcus ruber]/MCZ1073788.1 intein-containing DNA gyrase subunit A [Rhodococcus sp. A5(2022)]/MCZ4501257.1 intein-containing DNA gyrase subunit A [Rhodococcus ruber]/MCZ4528441.1 intein-containing DNA gy…	Rhodococcus/Rhodococcus ruber/Rhodococcus ruber/Rhodococcus sp. A5(2022)/Rhodococcus ruber/Rhodococcus ruber	0	1261	1261	1	1261	1	1261	1253	0.9937	1	1	1	0		WP_040273113/WP_040273113/WP_040273113	2422	EME64441.1 DNA gyrase subunit A [Rhodococcus ruber BKS 20-38]/MDM7489172.1 intein-containing DNA gyrase subunit A [Rhodococcus indonesiensis]/MULTISPECIES: intein-containing DNA gyrase subunit A [Rhodococcus]	Rhodococcus/Rhodococcus indonesiensis/Rhodococcus ruber BKS 20-38	0	1261	1261	1	1261	1	1261	1260	0.9992	1	1	1	0		WP_003936632;WP_003936632;WP_003936632	2448	gyrA	1830	WP_040273113		GO:0005737-IEA	cytoplasm-IEA
ENBDON_00014	MULTISPECIES: intein-containing DNA gyrase subunit A	MTDTTLPPEGPGHDRIEPVDIQQEMQSSYIDYAMSVIVGRALPDVRDGLKPVHRRVLYAMYDNGFRPDRGYVKSARAVAETMGNYHPHGDASIYDTLVRLAQPWSMRYPLVDGQGNFGSRGNDGAAAMRYCVPGDTLVRMPHGQSIRISEILPGVEPDSDNEIDLKVLDRHGNPVMAEMLFHSGTHRTYTLSTVEGYEMRGTANHPVLCLVDVAGVPTLLWKLLDEIRSGDRVVLQRVPSAEEHGRHNEYEAAAALLLGAFVSEGFVSENRAGFNNLDRDFFDRVVDAFDRVVGGRRYVYSRVSKSGSTLHELDVQDLTMLRRSVLADVIGQRSDHKSVPDFIWESPTPLKRIFLGALFEGDGSCSSLPRNTVQVSYSTRSMQLAKDVQQLLLEFGVVS…	1261	20	0	0.9414	/data/input/nr_20241120.dmnd	MULTISPECIES: intein-containing DNA gyrase subunit A [Rhodococcus]/AUM19144.1 intein-containing DNA gyrase subunit A [Rhodococcus ruber]/AXY49477.1 Mle gyrA intein [Rhodococcus ruber]/KXF85744.1 Mle gyrA intein [Rhodococcus ruber Chol-4]/QRE79152.1 intein-containing DNA gyrase subunit A [Rhodococcus ruber]/UQB72916.1 intein-containing DNA gyrase subunit A [Rhodococcus ruber]	Rhodococcus/Rhodococcus ruber/Rhodococcus ruber/Rhodococcus ruber Chol-4/Rhodococcus ruber/Rhodococcus ruber	0	1261	1261	1	1261	1	1261	1252	0.9929	1	1	1	0		WP_017681011/WP_017681011/WP_017681011	2421	EME64441.1 DNA gyrase subunit A [Rhodococcus ruber BKS 20-38]/MDM7489172.1 intein-containing DNA gyrase subunit A [Rhodococcus indonesiensis]/MULTISPECIES: intein-containing DNA gyrase subunit A [Rhodococcus]	Rhodococcus/Rhodococcus indonesiensis/Rhodococcus ruber BKS 20-38	0	1261	1261	1	1261	1	1261	1260	0.9992	1	1	1	0		WP_003936632;WP_003936632;WP_003936632	2448	A5740_10835	1834154	WP_076195920		GO:0016539-IEA	intein-mediated protein splicing-IEA
ENBDON_00014	MULTISPECIES: intein-containing DNA gyrase subunit A	MTDTTLPPEGPGHDRIEPVDIQQEMQSSYIDYAMSVIVGRALPDVRDGLKPVHRRVLYAMYDNGFRPDRGYVKSARAVAETMGNYHPHGDASIYDTLVRLAQPWSMRYPLVDGQGNFGSRGNDGAAAMRYCVPGDTLVRMPHGQSIRISEILPGVEPDSDNEIDLKVLDRHGNPVMAEMLFHSGTHRTYTLSTVEGYEMRGTANHPVLCLVDVAGVPTLLWKLLDEIRSGDRVVLQRVPSAEEHGRHNEYEAAAALLLGAFVSEGFVSENRAGFNNLDRDFFDRVVDAFDRVVGGRRYVYSRVSKSGSTLHELDVQDLTMLRRSVLADVIGQRSDHKSVPDFIWESPTPLKRIFLGALFEGDGSCSSLPRNTVQVSYSTRSMQLAKDVQQLLLEFGVVS…	1261	20	0	0.9414	/data/input/nr_20241120.dmnd	intein-containing DNA gyrase subunit A [Rhodococcus ruber]/MBP2214179.1 DNA gyrase subunit A [Rhodococcus ruber]	Rhodococcus ruber/Rhodococcus ruber	0	1261	1261	1	1261	1	1261	1252	0.9929	1	1	1	0		WP_210063151	2421	EME64441.1 DNA gyrase subunit A [Rhodococcus ruber BKS 20-38]/MDM7489172.1 intein-containing DNA gyrase subunit A [Rhodococcus indonesiensis]/MULTISPECIES: intein-containing DNA gyrase subunit A [Rhodococcus]	Rhodococcus/Rhodococcus indonesiensis/Rhodococcus ruber BKS 20-38	0	1261	1261	1	1261	1	1261	1260	0.9992	1	1	1	0		WP_003936632;WP_003936632;WP_003936632	2448	A5740_10835	1834154	WP_076195920		GO:0009330-IEA	DNA topoisomerase type II (double strand cut, ATP-hydrolyzing) complex-IEA
ENBDON_00014	MULTISPECIES: intein-containing DNA gyrase subunit A	MTDTTLPPEGPGHDRIEPVDIQQEMQSSYIDYAMSVIVGRALPDVRDGLKPVHRRVLYAMYDNGFRPDRGYVKSARAVAETMGNYHPHGDASIYDTLVRLAQPWSMRYPLVDGQGNFGSRGNDGAAAMRYCVPGDTLVRMPHGQSIRISEILPGVEPDSDNEIDLKVLDRHGNPVMAEMLFHSGTHRTYTLSTVEGYEMRGTANHPVLCLVDVAGVPTLLWKLLDEIRSGDRVVLQRVPSAEEHGRHNEYEAAAALLLGAFVSEGFVSENRAGFNNLDRDFFDRVVDAFDRVVGGRRYVYSRVSKSGSTLHELDVQDLTMLRRSVLADVIGQRSDHKSVPDFIWESPTPLKRIFLGALFEGDGSCSSLPRNTVQVSYSTRSMQLAKDVQQLLLEFGVVS…	1261	20	0	0.9414	/data/input/nr_20241120.dmnd	MULTISPECIES: intein-containing DNA gyrase subunit A [Rhodococcus]/ATQ30123.1 intein-containing DNA gyrase subunit A [Rhodococcus ruber]/MDO1480823.1 DNA gyrase subunit A [Rhodococcus ruber]	Rhodococcus/Rhodococcus ruber/Rhodococcus ruber	0	1261	1261	1	1261	1	1261	1252	0.9929	1	1	1	0		WP_010595453/WP_010595453	2420	EME64441.1 DNA gyrase subunit A [Rhodococcus ruber BKS 20-38]/MDM7489172.1 intein-containing DNA gyrase subunit A [Rhodococcus indonesiensis]/MULTISPECIES: intein-containing DNA gyrase subunit A [Rhodococcus]	Rhodococcus/Rhodococcus indonesiensis/Rhodococcus ruber BKS 20-38	0	1261	1261	1	1261	1	1261	1260	0.9992	1	1	1	0		WP_003936632;WP_003936632;WP_003936632	2448	AFM11_14625	59750	WP_067849882		GO:0004519-IEA	endonuclease activity-IEA
ENBDON_00014	MULTISPECIES: intein-containing DNA gyrase subunit A	MTDTTLPPEGPGHDRIEPVDIQQEMQSSYIDYAMSVIVGRALPDVRDGLKPVHRRVLYAMYDNGFRPDRGYVKSARAVAETMGNYHPHGDASIYDTLVRLAQPWSMRYPLVDGQGNFGSRGNDGAAAMRYCVPGDTLVRMPHGQSIRISEILPGVEPDSDNEIDLKVLDRHGNPVMAEMLFHSGTHRTYTLSTVEGYEMRGTANHPVLCLVDVAGVPTLLWKLLDEIRSGDRVVLQRVPSAEEHGRHNEYEAAAALLLGAFVSEGFVSENRAGFNNLDRDFFDRVVDAFDRVVGGRRYVYSRVSKSGSTLHELDVQDLTMLRRSVLADVIGQRSDHKSVPDFIWESPTPLKRIFLGALFEGDGSCSSLPRNTVQVSYSTRSMQLAKDVQQLLLEFGVVS…	1261	20	0	0.9414	/data/input/nr_20241120.dmnd	intein-containing DNA gyrase subunit A [Rhodococcus ruber]/MBD8055148.1 intein-containing DNA gyrase subunit A [Rhodococcus ruber]	Rhodococcus ruber/Rhodococcus ruber	0	1261	1261	1	1261	1	1261	1251	0.9921	1	1	1	0		WP_191902685	2420	EME64441.1 DNA gyrase subunit A [Rhodococcus ruber BKS 20-38]/MDM7489172.1 intein-containing DNA gyrase subunit A [Rhodococcus indonesiensis]/MULTISPECIES: intein-containing DNA gyrase subunit A [Rhodococcus]	Rhodococcus/Rhodococcus indonesiensis/Rhodococcus ruber BKS 20-38	0	1261	1261	1	1261	1	1261	1260	0.9992	1	1	1	0		WP_003936632;WP_003936632;WP_003936632	2448	A5740_10835	1834154	WP_076195920		GO:0003916-IEA	DNA topoisomerase activity-IEA
ENBDON_00014	MULTISPECIES: intein-containing DNA gyrase subunit A	MTDTTLPPEGPGHDRIEPVDIQQEMQSSYIDYAMSVIVGRALPDVRDGLKPVHRRVLYAMYDNGFRPDRGYVKSARAVAETMGNYHPHGDASIYDTLVRLAQPWSMRYPLVDGQGNFGSRGNDGAAAMRYCVPGDTLVRMPHGQSIRISEILPGVEPDSDNEIDLKVLDRHGNPVMAEMLFHSGTHRTYTLSTVEGYEMRGTANHPVLCLVDVAGVPTLLWKLLDEIRSGDRVVLQRVPSAEEHGRHNEYEAAAALLLGAFVSEGFVSENRAGFNNLDRDFFDRVVDAFDRVVGGRRYVYSRVSKSGSTLHELDVQDLTMLRRSVLADVIGQRSDHKSVPDFIWESPTPLKRIFLGALFEGDGSCSSLPRNTVQVSYSTRSMQLAKDVQQLLLEFGVVS…	1261	20	0	0.9414	/data/input/nr_20241120.dmnd	intein-containing DNA gyrase subunit A [Rhodococcus sp. (in: high G+C Gram-positive bacteria)]	Rhodococcus sp. (in: high G+C Gram-positive bacteria)	0	1261	1261	1	1261	1	1261	1251	0.9921	1	1	1	0		MDX5452955	2419	EME64441.1 DNA gyrase subunit A [Rhodococcus ruber BKS 20-38]/MDM7489172.1 intein-containing DNA gyrase subunit A [Rhodococcus indonesiensis]/MULTISPECIES: intein-containing DNA gyrase subunit A [Rhodococcus]	Rhodococcus/Rhodococcus indonesiensis/Rhodococcus ruber BKS 20-38	0	1261	1261	1	1261	1	1261	1260	0.9992	1	1	1	0		WP_003936632;WP_003936632;WP_003936632	2448	A5740_10835	1834154	WP_076195920		GO:0003918-IEA	DNA topoisomerase type II (double strand cut, ATP-hydrolyzing) activity-IEA
ENBDON_00014	MULTISPECIES: intein-containing DNA gyrase subunit A	MTDTTLPPEGPGHDRIEPVDIQQEMQSSYIDYAMSVIVGRALPDVRDGLKPVHRRVLYAMYDNGFRPDRGYVKSARAVAETMGNYHPHGDASIYDTLVRLAQPWSMRYPLVDGQGNFGSRGNDGAAAMRYCVPGDTLVRMPHGQSIRISEILPGVEPDSDNEIDLKVLDRHGNPVMAEMLFHSGTHRTYTLSTVEGYEMRGTANHPVLCLVDVAGVPTLLWKLLDEIRSGDRVVLQRVPSAEEHGRHNEYEAAAALLLGAFVSEGFVSENRAGFNNLDRDFFDRVVDAFDRVVGGRRYVYSRVSKSGSTLHELDVQDLTMLRRSVLADVIGQRSDHKSVPDFIWESPTPLKRIFLGALFEGDGSCSSLPRNTVQVSYSTRSMQLAKDVQQLLLEFGVVS…	1261	20	0	0.9414	/data/input/nr_20241120.dmnd	intein-containing DNA gyrase subunit A [Rhodococcus ruber]/MCF8784758.1 intein-containing DNA gyrase subunit A [Rhodococcus ruber]/MDV3206870.1 intein-containing DNA gyrase subunit A [Rhodococcus ruber]	Rhodococcus ruber/Rhodococcus ruber/Rhodococcus ruber	0	1261	1261	1	1261	1	1261	1251	0.9921	1	1	1	0		WP_237211198	2419	EME64441.1 DNA gyrase subunit A [Rhodococcus ruber BKS 20-38]/MDM7489172.1 intein-containing DNA gyrase subunit A [Rhodococcus indonesiensis]/MULTISPECIES: intein-containing DNA gyrase subunit A [Rhodococcus]	Rhodococcus/Rhodococcus indonesiensis/Rhodococcus ruber BKS 20-38	0	1261	1261	1	1261	1	1261	1260	0.9992	1	1	1	0		WP_003936632;WP_003936632;WP_003936632	2448	gyrA	1830	WP_040273113		GO:0034335-IEA	DNA negative supercoiling activity-IEA
ENBDON_00014	MULTISPECIES: intein-containing DNA gyrase subunit A	MTDTTLPPEGPGHDRIEPVDIQQEMQSSYIDYAMSVIVGRALPDVRDGLKPVHRRVLYAMYDNGFRPDRGYVKSARAVAETMGNYHPHGDASIYDTLVRLAQPWSMRYPLVDGQGNFGSRGNDGAAAMRYCVPGDTLVRMPHGQSIRISEILPGVEPDSDNEIDLKVLDRHGNPVMAEMLFHSGTHRTYTLSTVEGYEMRGTANHPVLCLVDVAGVPTLLWKLLDEIRSGDRVVLQRVPSAEEHGRHNEYEAAAALLLGAFVSEGFVSENRAGFNNLDRDFFDRVVDAFDRVVGGRRYVYSRVSKSGSTLHELDVQDLTMLRRSVLADVIGQRSDHKSVPDFIWESPTPLKRIFLGALFEGDGSCSSLPRNTVQVSYSTRSMQLAKDVQQLLLEFGVVS…	1261	20	0	0.9414	/data/input/nr_20241120.dmnd	MAG: DNA gyrase subunit A [Acidobacteriota bacterium]	Acidobacteriota bacterium	0	1261	1261	1	1261	1	1261	1251	0.9921	1	1	1	0		RIK10845	2418	EME64441.1 DNA gyrase subunit A [Rhodococcus ruber BKS 20-38]/MDM7489172.1 intein-containing DNA gyrase subunit A [Rhodococcus indonesiensis]/MULTISPECIES: intein-containing DNA gyrase subunit A [Rhodococcus]	Rhodococcus/Rhodococcus indonesiensis/Rhodococcus ruber BKS 20-38	0	1261	1261	1	1261	1	1261	1260	0.9992	1	1	1	0		WP_003936632;WP_003936632;WP_003936632	2448	AFM11_14625	59750	WP_067849882		GO:0006265-IEA	DNA topological change-IEA
ENBDON_00014	MULTISPECIES: intein-containing DNA gyrase subunit A	MTDTTLPPEGPGHDRIEPVDIQQEMQSSYIDYAMSVIVGRALPDVRDGLKPVHRRVLYAMYDNGFRPDRGYVKSARAVAETMGNYHPHGDASIYDTLVRLAQPWSMRYPLVDGQGNFGSRGNDGAAAMRYCVPGDTLVRMPHGQSIRISEILPGVEPDSDNEIDLKVLDRHGNPVMAEMLFHSGTHRTYTLSTVEGYEMRGTANHPVLCLVDVAGVPTLLWKLLDEIRSGDRVVLQRVPSAEEHGRHNEYEAAAALLLGAFVSEGFVSENRAGFNNLDRDFFDRVVDAFDRVVGGRRYVYSRVSKSGSTLHELDVQDLTMLRRSVLADVIGQRSDHKSVPDFIWESPTPLKRIFLGALFEGDGSCSSLPRNTVQVSYSTRSMQLAKDVQQLLLEFGVVS…	1261	20	0	0.9414	/data/input/nr_20241120.dmnd	intein-containing DNA gyrase subunit A [Rhodococcus ruber]/AWG97098.1 intein-containing DNA gyrase subunit A [Rhodococcus ruber]	Rhodococcus ruber/Rhodococcus ruber	0	1261	1261	1	1261	1	1261	1251	0.9921	1	1	1	0		WP_064066402	2417	EME64441.1 DNA gyrase subunit A [Rhodococcus ruber BKS 20-38]/MDM7489172.1 intein-containing DNA gyrase subunit A [Rhodococcus indonesiensis]/MULTISPECIES: intein-containing DNA gyrase subunit A [Rhodococcus]	Rhodococcus/Rhodococcus indonesiensis/Rhodococcus ruber BKS 20-38	0	1261	1261	1	1261	1	1261	1260	0.9992	1	1	1	0		WP_003936632;WP_003936632;WP_003936632	2448	gyrA	1830	WP_040273113		GO:0005524-IEA	ATP binding-IEA
ENBDON_00014	MULTISPECIES: intein-containing DNA gyrase subunit A	MTDTTLPPEGPGHDRIEPVDIQQEMQSSYIDYAMSVIVGRALPDVRDGLKPVHRRVLYAMYDNGFRPDRGYVKSARAVAETMGNYHPHGDASIYDTLVRLAQPWSMRYPLVDGQGNFGSRGNDGAAAMRYCVPGDTLVRMPHGQSIRISEILPGVEPDSDNEIDLKVLDRHGNPVMAEMLFHSGTHRTYTLSTVEGYEMRGTANHPVLCLVDVAGVPTLLWKLLDEIRSGDRVVLQRVPSAEEHGRHNEYEAAAALLLGAFVSEGFVSENRAGFNNLDRDFFDRVVDAFDRVVGGRRYVYSRVSKSGSTLHELDVQDLTMLRRSVLADVIGQRSDHKSVPDFIWESPTPLKRIFLGALFEGDGSCSSLPRNTVQVSYSTRSMQLAKDVQQLLLEFGVVS…	1261	20	0	0.9414	/data/input/nr_20241120.dmnd	intein-containing DNA gyrase subunit A [Rhodococcus ruber]/QDC12631.1 DNA gyrase subunit A [Rhodococcus ruber]	Rhodococcus ruber/Rhodococcus ruber	0	1261	1261	1	1261	1	1261	1250	0.9913	1	1	1	0		WP_140188131	2414	EME64441.1 DNA gyrase subunit A [Rhodococcus ruber BKS 20-38]/MDM7489172.1 intein-containing DNA gyrase subunit A [Rhodococcus indonesiensis]/MULTISPECIES: intein-containing DNA gyrase subunit A [Rhodococcus]	Rhodococcus/Rhodococcus indonesiensis/Rhodococcus ruber BKS 20-38	0	1261	1261	1	1261	1	1261	1260	0.9992	1	1	1	0		WP_003936632;WP_003936632;WP_003936632	2448	G352_12699	1278076	WP_003936632
ENBDON_00014	MULTISPECIES: intein-containing DNA gyrase subunit A	MTDTTLPPEGPGHDRIEPVDIQQEMQSSYIDYAMSVIVGRALPDVRDGLKPVHRRVLYAMYDNGFRPDRGYVKSARAVAETMGNYHPHGDASIYDTLVRLAQPWSMRYPLVDGQGNFGSRGNDGAAAMRYCVPGDTLVRMPHGQSIRISEILPGVEPDSDNEIDLKVLDRHGNPVMAEMLFHSGTHRTYTLSTVEGYEMRGTANHPVLCLVDVAGVPTLLWKLLDEIRSGDRVVLQRVPSAEEHGRHNEYEAAAALLLGAFVSEGFVSENRAGFNNLDRDFFDRVVDAFDRVVGGRRYVYSRVSKSGSTLHELDVQDLTMLRRSVLADVIGQRSDHKSVPDFIWESPTPLKRIFLGALFEGDGSCSSLPRNTVQVSYSTRSMQLAKDVQQLLLEFGVVS…	1261	20	0	0.9414	/data/input/nr_20241120.dmnd	intein-containing DNA gyrase subunit A [Skermania sp. ID1734]/TSD99248.1 DNA gyrase subunit A [Skermania sp. ID1734]	Skermania sp. ID1734/Skermania sp. ID1734	0	1266	1252	1	1251	1	1252	1136	0.9073	0.9889	0.9929	1	0		WP_143771156	2032	EME64441.1 DNA gyrase subunit A [Rhodococcus ruber BKS 20-38]/MDM7489172.1 intein-containing DNA gyrase subunit A [Rhodococcus indonesiensis]/MULTISPECIES: intein-containing DNA gyrase subunit A [Rhodococcus]	Rhodococcus/Rhodococcus indonesiensis/Rhodococcus ruber BKS 20-38	0	1261	1261	1	1261	1	1261	1260	0.9992	1	1	1	0		WP_003936632;WP_003936632;WP_003936632	2448	G352_12699	1278076	WP_003936632
ENBDON_00014	MULTISPECIES: intein-containing DNA gyrase subunit A	MTDTTLPPEGPGHDRIEPVDIQQEMQSSYIDYAMSVIVGRALPDVRDGLKPVHRRVLYAMYDNGFRPDRGYVKSARAVAETMGNYHPHGDASIYDTLVRLAQPWSMRYPLVDGQGNFGSRGNDGAAAMRYCVPGDTLVRMPHGQSIRISEILPGVEPDSDNEIDLKVLDRHGNPVMAEMLFHSGTHRTYTLSTVEGYEMRGTANHPVLCLVDVAGVPTLLWKLLDEIRSGDRVVLQRVPSAEEHGRHNEYEAAAALLLGAFVSEGFVSENRAGFNNLDRDFFDRVVDAFDRVVGGRRYVYSRVSKSGSTLHELDVQDLTMLRRSVLADVIGQRSDHKSVPDFIWESPTPLKRIFLGALFEGDGSCSSLPRNTVQVSYSTRSMQLAKDVQQLLLEFGVVS…	1261	20	0	0.9414	/data/input/nr_20241120.dmnd	intein-containing DNA gyrase subunit A [Nocardia sp. CC227C]	Nocardia sp. CC227C	0	1264	1253	1	1250	1	1251	1115	0.8899	0.9913	0.9937	1	0		WP_306363407	1954	EME64441.1 DNA gyrase subunit A [Rhodococcus ruber BKS 20-38]/MDM7489172.1 intein-containing DNA gyrase subunit A [Rhodococcus indonesiensis]/MULTISPECIES: intein-containing DNA gyrase subunit A [Rhodococcus]	Rhodococcus/Rhodococcus indonesiensis/Rhodococcus ruber BKS 20-38	0	1261	1261	1	1261	1	1261	1260	0.9992	1	1	1	0		WP_003936632;WP_003936632;WP_003936632	2448	G352_12699	1278076	WP_003936632
ENBDON_00014	MULTISPECIES: intein-containing DNA gyrase subunit A	MTDTTLPPEGPGHDRIEPVDIQQEMQSSYIDYAMSVIVGRALPDVRDGLKPVHRRVLYAMYDNGFRPDRGYVKSARAVAETMGNYHPHGDASIYDTLVRLAQPWSMRYPLVDGQGNFGSRGNDGAAAMRYCVPGDTLVRMPHGQSIRISEILPGVEPDSDNEIDLKVLDRHGNPVMAEMLFHSGTHRTYTLSTVEGYEMRGTANHPVLCLVDVAGVPTLLWKLLDEIRSGDRVVLQRVPSAEEHGRHNEYEAAAALLLGAFVSEGFVSENRAGFNNLDRDFFDRVVDAFDRVVGGRRYVYSRVSKSGSTLHELDVQDLTMLRRSVLADVIGQRSDHKSVPDFIWESPTPLKRIFLGALFEGDGSCSSLPRNTVQVSYSTRSMQLAKDVQQLLLEFGVVS…	1261	20	0	0.9414	/data/input/nr_20241120.dmnd	intein-containing DNA gyrase subunit A [Rhodococcus trifolii]/GGF91252.1 DNA gyrase subunit A [Rhodococcus trifolii]	Rhodococcus trifolii/Rhodococcus trifolii	0	1258	1255	1	1254	1	1252	1098	0.8749	0.9976	0.9952	1	0		WP_188542808	1939	EME64441.1 DNA gyrase subunit A [Rhodococcus ruber BKS 20-38]/MDM7489172.1 intein-containing DNA gyrase subunit A [Rhodococcus indonesiensis]/MULTISPECIES: intein-containing DNA gyrase subunit A [Rhodococcus]	Rhodococcus/Rhodococcus indonesiensis/Rhodococcus ruber BKS 20-38	0	1261	1261	1	1261	1	1261	1260	0.9992	1	1	1	0		WP_003936632;WP_003936632;WP_003936632	2448	AFM11_14625	59750	WP_067849882
ENBDON_00014	MULTISPECIES: intein-containing DNA gyrase subunit A	MTDTTLPPEGPGHDRIEPVDIQQEMQSSYIDYAMSVIVGRALPDVRDGLKPVHRRVLYAMYDNGFRPDRGYVKSARAVAETMGNYHPHGDASIYDTLVRLAQPWSMRYPLVDGQGNFGSRGNDGAAAMRYCVPGDTLVRMPHGQSIRISEILPGVEPDSDNEIDLKVLDRHGNPVMAEMLFHSGTHRTYTLSTVEGYEMRGTANHPVLCLVDVAGVPTLLWKLLDEIRSGDRVVLQRVPSAEEHGRHNEYEAAAALLLGAFVSEGFVSENRAGFNNLDRDFFDRVVDAFDRVVGGRRYVYSRVSKSGSTLHELDVQDLTMLRRSVLADVIGQRSDHKSVPDFIWESPTPLKRIFLGALFEGDGSCSSLPRNTVQVSYSTRSMQLAKDVQQLLLEFGVVS…	1261	20	0	0.9414	/data/input/nr_20241120.dmnd	DNA gyrase subunit A [Mycolicibacterium porcinum]	Mycolicibacterium porcinum	0	1256	1260	1	1254	1	1260	1100	0.873	1.0032	0.9992	1	0		OLO99242	1929	EME64441.1 DNA gyrase subunit A [Rhodococcus ruber BKS 20-38]/MDM7489172.1 intein-containing DNA gyrase subunit A [Rhodococcus indonesiensis]/MULTISPECIES: intein-containing DNA gyrase subunit A [Rhodococcus]	Rhodococcus/Rhodococcus indonesiensis/Rhodococcus ruber BKS 20-38	0	1261	1261	1	1261	1	1261	1260	0.9992	1	1	1	0		WP_003936632;WP_003936632;WP_003936632	2448	G352_12699	1278076	WP_003936632
ENBDON_00014	MULTISPECIES: intein-containing DNA gyrase subunit A	MTDTTLPPEGPGHDRIEPVDIQQEMQSSYIDYAMSVIVGRALPDVRDGLKPVHRRVLYAMYDNGFRPDRGYVKSARAVAETMGNYHPHGDASIYDTLVRLAQPWSMRYPLVDGQGNFGSRGNDGAAAMRYCVPGDTLVRMPHGQSIRISEILPGVEPDSDNEIDLKVLDRHGNPVMAEMLFHSGTHRTYTLSTVEGYEMRGTANHPVLCLVDVAGVPTLLWKLLDEIRSGDRVVLQRVPSAEEHGRHNEYEAAAALLLGAFVSEGFVSENRAGFNNLDRDFFDRVVDAFDRVVGGRRYVYSRVSKSGSTLHELDVQDLTMLRRSVLADVIGQRSDHKSVPDFIWESPTPLKRIFLGALFEGDGSCSSLPRNTVQVSYSTRSMQLAKDVQQLLLEFGVVS…	1261	20	0	0.9414	/data/input/nr_20241120.dmnd	intein-containing DNA gyrase subunit A [Mycobacterium sp. GA-1841]/OMC34122.1 DNA gyrase subunit A [Mycobacterium sp. GA-1841]	Mycobacterium sp. GA-1841/Mycobacterium sp. GA-1841	0	1259	1249	1	1243	1	1249	1089	0.8719	0.9921	0.9905	1	0		WP_076195920	1925	EME64441.1 DNA gyrase subunit A [Rhodococcus ruber BKS 20-38]/MDM7489172.1 intein-containing DNA gyrase subunit A [Rhodococcus indonesiensis]/MULTISPECIES: intein-containing DNA gyrase subunit A [Rhodococcus]	Rhodococcus/Rhodococcus indonesiensis/Rhodococcus ruber BKS 20-38	0	1261	1261	1	1261	1	1261	1260	0.9992	1	1	1	0		WP_003936632;WP_003936632;WP_003936632	2448	G352_12699	1278076	WP_003936632
ENBDON_00014	MULTISPECIES: intein-containing DNA gyrase subunit A	MTDTTLPPEGPGHDRIEPVDIQQEMQSSYIDYAMSVIVGRALPDVRDGLKPVHRRVLYAMYDNGFRPDRGYVKSARAVAETMGNYHPHGDASIYDTLVRLAQPWSMRYPLVDGQGNFGSRGNDGAAAMRYCVPGDTLVRMPHGQSIRISEILPGVEPDSDNEIDLKVLDRHGNPVMAEMLFHSGTHRTYTLSTVEGYEMRGTANHPVLCLVDVAGVPTLLWKLLDEIRSGDRVVLQRVPSAEEHGRHNEYEAAAALLLGAFVSEGFVSENRAGFNNLDRDFFDRVVDAFDRVVGGRRYVYSRVSKSGSTLHELDVQDLTMLRRSVLADVIGQRSDHKSVPDFIWESPTPLKRIFLGALFEGDGSCSSLPRNTVQVSYSTRSMQLAKDVQQLLLEFGVVS…	1261	20	0	0.9414	/data/input/nr_20241120.dmnd	intein-containing DNA gyrase subunit A [Mycobacterium dioxanotrophicus]/ART73277.1 DNA gyrase subunit A [Mycobacterium dioxanotrophicus]	Mycobacterium dioxanotrophicus/Mycobacterium dioxanotrophicus	0	1258	1261	1	1255	1	1261	1104	0.8755	1.0024	1	1	0		WP_087081334	1922	EME64441.1 DNA gyrase subunit A [Rhodococcus ruber BKS 20-38]/MDM7489172.1 intein-containing DNA gyrase subunit A [Rhodococcus indonesiensis]/MULTISPECIES: intein-containing DNA gyrase subunit A [Rhodococcus]	Rhodococcus/Rhodococcus indonesiensis/Rhodococcus ruber BKS 20-38	0	1261	1261	1	1261	1	1261	1260	0.9992	1	1	1	0		WP_003936632;WP_003936632;WP_003936632	2448	gyrA	1830	WP_040273113
ENBDON_00014	MULTISPECIES: intein-containing DNA gyrase subunit A	MTDTTLPPEGPGHDRIEPVDIQQEMQSSYIDYAMSVIVGRALPDVRDGLKPVHRRVLYAMYDNGFRPDRGYVKSARAVAETMGNYHPHGDASIYDTLVRLAQPWSMRYPLVDGQGNFGSRGNDGAAAMRYCVPGDTLVRMPHGQSIRISEILPGVEPDSDNEIDLKVLDRHGNPVMAEMLFHSGTHRTYTLSTVEGYEMRGTANHPVLCLVDVAGVPTLLWKLLDEIRSGDRVVLQRVPSAEEHGRHNEYEAAAALLLGAFVSEGFVSENRAGFNNLDRDFFDRVVDAFDRVVGGRRYVYSRVSKSGSTLHELDVQDLTMLRRSVLADVIGQRSDHKSVPDFIWESPTPLKRIFLGALFEGDGSCSSLPRNTVQVSYSTRSMQLAKDVQQLLLEFGVVS…	1261	20	0	0.9414	/data/input/nr_20241120.dmnd	intein-containing DNA gyrase subunit A [Mycolicibacterium mageritense]/BBX33092.1 DNA gyrase subunit A [Mycolicibacterium mageritense]/CDO21528.1 DNA gyrase subunit A [Mycolicibacterium mageritense DSM 44476 = CIP 104973]	Mycolicibacterium mageritense/Mycolicibacterium mageritense/Mycolicibacterium mageritense DSM 44476 = CIP 104973	0	1255	1260	1	1254	1	1260	1097	0.8706	1.004	0.9992	1	0		WP_036430433/WP_036430433	1922	EME64441.1 DNA gyrase subunit A [Rhodococcus ruber BKS 20-38]/MDM7489172.1 intein-containing DNA gyrase subunit A [Rhodococcus indonesiensis]/MULTISPECIES: intein-containing DNA gyrase subunit A [Rhodococcus]	Rhodococcus/Rhodococcus indonesiensis/Rhodococcus ruber BKS 20-38	0	1261	1261	1	1261	1	1261	1260	0.9992	1	1	1	0		WP_003936632;WP_003936632;WP_003936632	2448	G352_12699	1278076	WP_003936632
ENBDON_00014	MULTISPECIES: intein-containing DNA gyrase subunit A	MTDTTLPPEGPGHDRIEPVDIQQEMQSSYIDYAMSVIVGRALPDVRDGLKPVHRRVLYAMYDNGFRPDRGYVKSARAVAETMGNYHPHGDASIYDTLVRLAQPWSMRYPLVDGQGNFGSRGNDGAAAMRYCVPGDTLVRMPHGQSIRISEILPGVEPDSDNEIDLKVLDRHGNPVMAEMLFHSGTHRTYTLSTVEGYEMRGTANHPVLCLVDVAGVPTLLWKLLDEIRSGDRVVLQRVPSAEEHGRHNEYEAAAALLLGAFVSEGFVSENRAGFNNLDRDFFDRVVDAFDRVVGGRRYVYSRVSKSGSTLHELDVQDLTMLRRSVLADVIGQRSDHKSVPDFIWESPTPLKRIFLGALFEGDGSCSSLPRNTVQVSYSTRSMQLAKDVQQLLLEFGVVS…	1261	20	0	0.9414	/data/input/nr_20241120.dmnd	intein-containing DNA gyrase subunit A [Mycolicibacterium wolinskyi]/KWX23504.1 Mle gyrA intein [Mycolicibacterium wolinskyi]	Mycolicibacterium wolinskyi/Mycolicibacterium wolinskyi	0	1255	1261	1	1255	1	1261	1098	0.8707	1.0048	1	1	0		WP_067849882	1921	EME64441.1 DNA gyrase subunit A [Rhodococcus ruber BKS 20-38]/MDM7489172.1 intein-containing DNA gyrase subunit A [Rhodococcus indonesiensis]/MULTISPECIES: intein-containing DNA gyrase subunit A [Rhodococcus]	Rhodococcus/Rhodococcus indonesiensis/Rhodococcus ruber BKS 20-38	0	1261	1261	1	1261	1	1261	1260	0.9992	1	1	1	0		WP_003936632;WP_003936632;WP_003936632	2448	A5740_10835	1834154	WP_076195920
ENBDON_00014	MULTISPECIES: intein-containing DNA gyrase subunit A	MTDTTLPPEGPGHDRIEPVDIQQEMQSSYIDYAMSVIVGRALPDVRDGLKPVHRRVLYAMYDNGFRPDRGYVKSARAVAETMGNYHPHGDASIYDTLVRLAQPWSMRYPLVDGQGNFGSRGNDGAAAMRYCVPGDTLVRMPHGQSIRISEILPGVEPDSDNEIDLKVLDRHGNPVMAEMLFHSGTHRTYTLSTVEGYEMRGTANHPVLCLVDVAGVPTLLWKLLDEIRSGDRVVLQRVPSAEEHGRHNEYEAAAALLLGAFVSEGFVSENRAGFNNLDRDFFDRVVDAFDRVVGGRRYVYSRVSKSGSTLHELDVQDLTMLRRSVLADVIGQRSDHKSVPDFIWESPTPLKRIFLGALFEGDGSCSSLPRNTVQVSYSTRSMQLAKDVQQLLLEFGVVS…	1261	20	0	0.9414	/data/input/nr_20241120.dmnd	intein-containing DNA gyrase subunit A [Mycolicibacterium mageritense]/BDY28285.1 DNA gyrase subunit A [Mycolicibacterium mageritense]	Mycolicibacterium mageritense/Mycolicibacterium mageritense	0	1255	1260	1	1254	1	1260	1097	0.8706	1.004	0.9992	1	0		WP_286214788	1920	EME64441.1 DNA gyrase subunit A [Rhodococcus ruber BKS 20-38]/MDM7489172.1 intein-containing DNA gyrase subunit A [Rhodococcus indonesiensis]/MULTISPECIES: intein-containing DNA gyrase subunit A [Rhodococcus]	Rhodococcus/Rhodococcus indonesiensis/Rhodococcus ruber BKS 20-38	0	1261	1261	1	1261	1	1261	1260	0.9992	1	1	1	0		WP_003936632;WP_003936632;WP_003936632	2448	A5740_10835	1834154	WP_076195920
ENBDON_00014	MULTISPECIES: intein-containing DNA gyrase subunit A	MTDTTLPPEGPGHDRIEPVDIQQEMQSSYIDYAMSVIVGRALPDVRDGLKPVHRRVLYAMYDNGFRPDRGYVKSARAVAETMGNYHPHGDASIYDTLVRLAQPWSMRYPLVDGQGNFGSRGNDGAAAMRYCVPGDTLVRMPHGQSIRISEILPGVEPDSDNEIDLKVLDRHGNPVMAEMLFHSGTHRTYTLSTVEGYEMRGTANHPVLCLVDVAGVPTLLWKLLDEIRSGDRVVLQRVPSAEEHGRHNEYEAAAALLLGAFVSEGFVSENRAGFNNLDRDFFDRVVDAFDRVVGGRRYVYSRVSKSGSTLHELDVQDLTMLRRSVLADVIGQRSDHKSVPDFIWESPTPLKRIFLGALFEGDGSCSSLPRNTVQVSYSTRSMQLAKDVQQLLLEFGVVS…	1261	20	0	0.9414	/data/input/nr_20241120.dmnd																			EME64441.1 DNA gyrase subunit A [Rhodococcus ruber BKS 20-38]/MDM7489172.1 intein-containing DNA gyrase subunit A [Rhodococcus indonesiensis]/MULTISPECIES: intein-containing DNA gyrase subunit A [Rhodococcus]	Rhodococcus/Rhodococcus indonesiensis/Rhodococcus ruber BKS 20-38	0	1261	1261	1	1261	1	1261	1260	0.9992	1	1	1	0		WP_003936632;WP_003936632;WP_003936632	2448	A5740_10835	1834154	WP_076195920
ENBDON_00014	MULTISPECIES: intein-containing DNA gyrase subunit A	MTDTTLPPEGPGHDRIEPVDIQQEMQSSYIDYAMSVIVGRALPDVRDGLKPVHRRVLYAMYDNGFRPDRGYVKSARAVAETMGNYHPHGDASIYDTLVRLAQPWSMRYPLVDGQGNFGSRGNDGAAAMRYCVPGDTLVRMPHGQSIRISEILPGVEPDSDNEIDLKVLDRHGNPVMAEMLFHSGTHRTYTLSTVEGYEMRGTANHPVLCLVDVAGVPTLLWKLLDEIRSGDRVVLQRVPSAEEHGRHNEYEAAAALLLGAFVSEGFVSENRAGFNNLDRDFFDRVVDAFDRVVGGRRYVYSRVSKSGSTLHELDVQDLTMLRRSVLADVIGQRSDHKSVPDFIWESPTPLKRIFLGALFEGDGSCSSLPRNTVQVSYSTRSMQLAKDVQQLLLEFGVVS…	1261	20	0	0.9414	/data/input/nr_20241120.dmnd																			EME64441.1 DNA gyrase subunit A [Rhodococcus ruber BKS 20-38]/MDM7489172.1 intein-containing DNA gyrase subunit A [Rhodococcus indonesiensis]/MULTISPECIES: intein-containing DNA gyrase subunit A [Rhodococcus]	Rhodococcus/Rhodococcus indonesiensis/Rhodococcus ruber BKS 20-38	0	1261	1261	1	1261	1	1261	1260	0.9992	1	1	1	0		WP_003936632;WP_003936632;WP_003936632	2448	gyrA	1830	WP_040273113
ENBDON_00014	MULTISPECIES: intein-containing DNA gyrase subunit A	MTDTTLPPEGPGHDRIEPVDIQQEMQSSYIDYAMSVIVGRALPDVRDGLKPVHRRVLYAMYDNGFRPDRGYVKSARAVAETMGNYHPHGDASIYDTLVRLAQPWSMRYPLVDGQGNFGSRGNDGAAAMRYCVPGDTLVRMPHGQSIRISEILPGVEPDSDNEIDLKVLDRHGNPVMAEMLFHSGTHRTYTLSTVEGYEMRGTANHPVLCLVDVAGVPTLLWKLLDEIRSGDRVVLQRVPSAEEHGRHNEYEAAAALLLGAFVSEGFVSENRAGFNNLDRDFFDRVVDAFDRVVGGRRYVYSRVSKSGSTLHELDVQDLTMLRRSVLADVIGQRSDHKSVPDFIWESPTPLKRIFLGALFEGDGSCSSLPRNTVQVSYSTRSMQLAKDVQQLLLEFGVVS…	1261	20	0	0.9414	/data/input/nr_20241120.dmnd																			EME64441.1 DNA gyrase subunit A [Rhodococcus ruber BKS 20-38]/MDM7489172.1 intein-containing DNA gyrase subunit A [Rhodococcus indonesiensis]/MULTISPECIES: intein-containing DNA gyrase subunit A [Rhodococcus]	Rhodococcus/Rhodococcus indonesiensis/Rhodococcus ruber BKS 20-38	0	1261	1261	1	1261	1	1261	1260	0.9992	1	1	1	0		WP_003936632;WP_003936632;WP_003936632	2448	AFM11_14625	59750	WP_067849882
ENBDON_00014	MULTISPECIES: intein-containing DNA gyrase subunit A	MTDTTLPPEGPGHDRIEPVDIQQEMQSSYIDYAMSVIVGRALPDVRDGLKPVHRRVLYAMYDNGFRPDRGYVKSARAVAETMGNYHPHGDASIYDTLVRLAQPWSMRYPLVDGQGNFGSRGNDGAAAMRYCVPGDTLVRMPHGQSIRISEILPGVEPDSDNEIDLKVLDRHGNPVMAEMLFHSGTHRTYTLSTVEGYEMRGTANHPVLCLVDVAGVPTLLWKLLDEIRSGDRVVLQRVPSAEEHGRHNEYEAAAALLLGAFVSEGFVSENRAGFNNLDRDFFDRVVDAFDRVVGGRRYVYSRVSKSGSTLHELDVQDLTMLRRSVLADVIGQRSDHKSVPDFIWESPTPLKRIFLGALFEGDGSCSSLPRNTVQVSYSTRSMQLAKDVQQLLLEFGVVS…	1261	20	0	0.9414	/data/input/nr_20241120.dmnd																			EME64441.1 DNA gyrase subunit A [Rhodococcus ruber BKS 20-38]/MDM7489172.1 intein-containing DNA gyrase subunit A [Rhodococcus indonesiensis]/MULTISPECIES: intein-containing DNA gyrase subunit A [Rhodococcus]	Rhodococcus/Rhodococcus indonesiensis/Rhodococcus ruber BKS 20-38	0	1261	1261	1	1261	1	1261	1260	0.9992	1	1	1	0		WP_003936632;WP_003936632;WP_003936632	2448	A5740_10835	1834154	WP_076195920
ENBDON_00014	MULTISPECIES: intein-containing DNA gyrase subunit A	MTDTTLPPEGPGHDRIEPVDIQQEMQSSYIDYAMSVIVGRALPDVRDGLKPVHRRVLYAMYDNGFRPDRGYVKSARAVAETMGNYHPHGDASIYDTLVRLAQPWSMRYPLVDGQGNFGSRGNDGAAAMRYCVPGDTLVRMPHGQSIRISEILPGVEPDSDNEIDLKVLDRHGNPVMAEMLFHSGTHRTYTLSTVEGYEMRGTANHPVLCLVDVAGVPTLLWKLLDEIRSGDRVVLQRVPSAEEHGRHNEYEAAAALLLGAFVSEGFVSENRAGFNNLDRDFFDRVVDAFDRVVGGRRYVYSRVSKSGSTLHELDVQDLTMLRRSVLADVIGQRSDHKSVPDFIWESPTPLKRIFLGALFEGDGSCSSLPRNTVQVSYSTRSMQLAKDVQQLLLEFGVVS…	1261	20	0	0.9414	/data/input/nr_20241120.dmnd																			EME64441.1 DNA gyrase subunit A [Rhodococcus ruber BKS 20-38]/MDM7489172.1 intein-containing DNA gyrase subunit A [Rhodococcus indonesiensis]/MULTISPECIES: intein-containing DNA gyrase subunit A [Rhodococcus]	Rhodococcus/Rhodococcus indonesiensis/Rhodococcus ruber BKS 20-38	0	1261	1261	1	1261	1	1261	1260	0.9992	1	1	1	0		WP_003936632;WP_003936632;WP_003936632	2448	G352_12699	1278076	WP_003936632
ENBDON_00014	MULTISPECIES: intein-containing DNA gyrase subunit A	MTDTTLPPEGPGHDRIEPVDIQQEMQSSYIDYAMSVIVGRALPDVRDGLKPVHRRVLYAMYDNGFRPDRGYVKSARAVAETMGNYHPHGDASIYDTLVRLAQPWSMRYPLVDGQGNFGSRGNDGAAAMRYCVPGDTLVRMPHGQSIRISEILPGVEPDSDNEIDLKVLDRHGNPVMAEMLFHSGTHRTYTLSTVEGYEMRGTANHPVLCLVDVAGVPTLLWKLLDEIRSGDRVVLQRVPSAEEHGRHNEYEAAAALLLGAFVSEGFVSENRAGFNNLDRDFFDRVVDAFDRVVGGRRYVYSRVSKSGSTLHELDVQDLTMLRRSVLADVIGQRSDHKSVPDFIWESPTPLKRIFLGALFEGDGSCSSLPRNTVQVSYSTRSMQLAKDVQQLLLEFGVVS…	1261	20	0	0.9414	/data/input/nr_20241120.dmnd																			EME64441.1 DNA gyrase subunit A [Rhodococcus ruber BKS 20-38]/MDM7489172.1 intein-containing DNA gyrase subunit A [Rhodococcus indonesiensis]/MULTISPECIES: intein-containing DNA gyrase subunit A [Rhodococcus]	Rhodococcus/Rhodococcus indonesiensis/Rhodococcus ruber BKS 20-38	0	1261	1261	1	1261	1	1261	1260	0.9992	1	1	1	0		WP_003936632;WP_003936632;WP_003936632	2448	gyrA	1830	WP_040273113
ENBDON_00014	MULTISPECIES: intein-containing DNA gyrase subunit A	MTDTTLPPEGPGHDRIEPVDIQQEMQSSYIDYAMSVIVGRALPDVRDGLKPVHRRVLYAMYDNGFRPDRGYVKSARAVAETMGNYHPHGDASIYDTLVRLAQPWSMRYPLVDGQGNFGSRGNDGAAAMRYCVPGDTLVRMPHGQSIRISEILPGVEPDSDNEIDLKVLDRHGNPVMAEMLFHSGTHRTYTLSTVEGYEMRGTANHPVLCLVDVAGVPTLLWKLLDEIRSGDRVVLQRVPSAEEHGRHNEYEAAAALLLGAFVSEGFVSENRAGFNNLDRDFFDRVVDAFDRVVGGRRYVYSRVSKSGSTLHELDVQDLTMLRRSVLADVIGQRSDHKSVPDFIWESPTPLKRIFLGALFEGDGSCSSLPRNTVQVSYSTRSMQLAKDVQQLLLEFGVVS…	1261	20	0	0.9414	/data/input/nr_20241120.dmnd																			EME64441.1 DNA gyrase subunit A [Rhodococcus ruber BKS 20-38]/MDM7489172.1 intein-containing DNA gyrase subunit A [Rhodococcus indonesiensis]/MULTISPECIES: intein-containing DNA gyrase subunit A [Rhodococcus]	Rhodococcus/Rhodococcus indonesiensis/Rhodococcus ruber BKS 20-38	0	1261	1261	1	1261	1	1261	1260	0.9992	1	1	1	0		WP_003936632;WP_003936632;WP_003936632	2448	gyrA	1830	WP_040273113
ENBDON_00014	MULTISPECIES: intein-containing DNA gyrase subunit A	MTDTTLPPEGPGHDRIEPVDIQQEMQSSYIDYAMSVIVGRALPDVRDGLKPVHRRVLYAMYDNGFRPDRGYVKSARAVAETMGNYHPHGDASIYDTLVRLAQPWSMRYPLVDGQGNFGSRGNDGAAAMRYCVPGDTLVRMPHGQSIRISEILPGVEPDSDNEIDLKVLDRHGNPVMAEMLFHSGTHRTYTLSTVEGYEMRGTANHPVLCLVDVAGVPTLLWKLLDEIRSGDRVVLQRVPSAEEHGRHNEYEAAAALLLGAFVSEGFVSENRAGFNNLDRDFFDRVVDAFDRVVGGRRYVYSRVSKSGSTLHELDVQDLTMLRRSVLADVIGQRSDHKSVPDFIWESPTPLKRIFLGALFEGDGSCSSLPRNTVQVSYSTRSMQLAKDVQQLLLEFGVVS…	1261	20	0	0.9414	/data/input/nr_20241120.dmnd																			EME64441.1 DNA gyrase subunit A [Rhodococcus ruber BKS 20-38]/MDM7489172.1 intein-containing DNA gyrase subunit A [Rhodococcus indonesiensis]/MULTISPECIES: intein-containing DNA gyrase subunit A [Rhodococcus]	Rhodococcus/Rhodococcus indonesiensis/Rhodococcus ruber BKS 20-38	0	1261	1261	1	1261	1	1261	1260	0.9992	1	1	1	0		WP_003936632;WP_003936632;WP_003936632	2448	gyrA	1830	WP_040273113
ENBDON_00014	MULTISPECIES: intein-containing DNA gyrase subunit A	MTDTTLPPEGPGHDRIEPVDIQQEMQSSYIDYAMSVIVGRALPDVRDGLKPVHRRVLYAMYDNGFRPDRGYVKSARAVAETMGNYHPHGDASIYDTLVRLAQPWSMRYPLVDGQGNFGSRGNDGAAAMRYCVPGDTLVRMPHGQSIRISEILPGVEPDSDNEIDLKVLDRHGNPVMAEMLFHSGTHRTYTLSTVEGYEMRGTANHPVLCLVDVAGVPTLLWKLLDEIRSGDRVVLQRVPSAEEHGRHNEYEAAAALLLGAFVSEGFVSENRAGFNNLDRDFFDRVVDAFDRVVGGRRYVYSRVSKSGSTLHELDVQDLTMLRRSVLADVIGQRSDHKSVPDFIWESPTPLKRIFLGALFEGDGSCSSLPRNTVQVSYSTRSMQLAKDVQQLLLEFGVVS…	1261	20	0	0.9414	/data/input/nr_20241120.dmnd																			EME64441.1 DNA gyrase subunit A [Rhodococcus ruber BKS 20-38]/MDM7489172.1 intein-containing DNA gyrase subunit A [Rhodococcus indonesiensis]/MULTISPECIES: intein-containing DNA gyrase subunit A [Rhodococcus]	Rhodococcus/Rhodococcus indonesiensis/Rhodococcus ruber BKS 20-38	0	1261	1261	1	1261	1	1261	1260	0.9992	1	1	1	0		WP_003936632;WP_003936632;WP_003936632	2448	AFM11_14625	59750	WP_067849882
ENBDON_00014	MULTISPECIES: intein-containing DNA gyrase subunit A	MTDTTLPPEGPGHDRIEPVDIQQEMQSSYIDYAMSVIVGRALPDVRDGLKPVHRRVLYAMYDNGFRPDRGYVKSARAVAETMGNYHPHGDASIYDTLVRLAQPWSMRYPLVDGQGNFGSRGNDGAAAMRYCVPGDTLVRMPHGQSIRISEILPGVEPDSDNEIDLKVLDRHGNPVMAEMLFHSGTHRTYTLSTVEGYEMRGTANHPVLCLVDVAGVPTLLWKLLDEIRSGDRVVLQRVPSAEEHGRHNEYEAAAALLLGAFVSEGFVSENRAGFNNLDRDFFDRVVDAFDRVVGGRRYVYSRVSKSGSTLHELDVQDLTMLRRSVLADVIGQRSDHKSVPDFIWESPTPLKRIFLGALFEGDGSCSSLPRNTVQVSYSTRSMQLAKDVQQLLLEFGVVS…	1261	20	0	0.9414	/data/input/nr_20241120.dmnd																			EME64441.1 DNA gyrase subunit A [Rhodococcus ruber BKS 20-38]/MDM7489172.1 intein-containing DNA gyrase subunit A [Rhodococcus indonesiensis]/MULTISPECIES: intein-containing DNA gyrase subunit A [Rhodococcus]	Rhodococcus/Rhodococcus indonesiensis/Rhodococcus ruber BKS 20-38	0	1261	1261	1	1261	1	1261	1260	0.9992	1	1	1	0		WP_003936632;WP_003936632;WP_003936632	2448	AFM11_14625	59750	WP_067849882
ENBDON_00014	MULTISPECIES: intein-containing DNA gyrase subunit A	MTDTTLPPEGPGHDRIEPVDIQQEMQSSYIDYAMSVIVGRALPDVRDGLKPVHRRVLYAMYDNGFRPDRGYVKSARAVAETMGNYHPHGDASIYDTLVRLAQPWSMRYPLVDGQGNFGSRGNDGAAAMRYCVPGDTLVRMPHGQSIRISEILPGVEPDSDNEIDLKVLDRHGNPVMAEMLFHSGTHRTYTLSTVEGYEMRGTANHPVLCLVDVAGVPTLLWKLLDEIRSGDRVVLQRVPSAEEHGRHNEYEAAAALLLGAFVSEGFVSENRAGFNNLDRDFFDRVVDAFDRVVGGRRYVYSRVSKSGSTLHELDVQDLTMLRRSVLADVIGQRSDHKSVPDFIWESPTPLKRIFLGALFEGDGSCSSLPRNTVQVSYSTRSMQLAKDVQQLLLEFGVVS…	1261	20	0	0.9414	/data/input/nr_20241120.dmnd																			EME64441.1 DNA gyrase subunit A [Rhodococcus ruber BKS 20-38]/MDM7489172.1 intein-containing DNA gyrase subunit A [Rhodococcus indonesiensis]/MULTISPECIES: intein-containing DNA gyrase subunit A [Rhodococcus]	Rhodococcus/Rhodococcus indonesiensis/Rhodococcus ruber BKS 20-38	0	1261	1261	1	1261	1	1261	1260	0.9992	1	1	1	0		WP_003936632;WP_003936632;WP_003936632	2448	G352_12699	1278076	WP_003936632
ENBDON_00014	MULTISPECIES: intein-containing DNA gyrase subunit A	MTDTTLPPEGPGHDRIEPVDIQQEMQSSYIDYAMSVIVGRALPDVRDGLKPVHRRVLYAMYDNGFRPDRGYVKSARAVAETMGNYHPHGDASIYDTLVRLAQPWSMRYPLVDGQGNFGSRGNDGAAAMRYCVPGDTLVRMPHGQSIRISEILPGVEPDSDNEIDLKVLDRHGNPVMAEMLFHSGTHRTYTLSTVEGYEMRGTANHPVLCLVDVAGVPTLLWKLLDEIRSGDRVVLQRVPSAEEHGRHNEYEAAAALLLGAFVSEGFVSENRAGFNNLDRDFFDRVVDAFDRVVGGRRYVYSRVSKSGSTLHELDVQDLTMLRRSVLADVIGQRSDHKSVPDFIWESPTPLKRIFLGALFEGDGSCSSLPRNTVQVSYSTRSMQLAKDVQQLLLEFGVVS…	1261	20	0	0.9414	/data/input/nr_20241120.dmnd																			EME64441.1 DNA gyrase subunit A [Rhodococcus ruber BKS 20-38]/MDM7489172.1 intein-containing DNA gyrase subunit A [Rhodococcus indonesiensis]/MULTISPECIES: intein-containing DNA gyrase subunit A [Rhodococcus]	Rhodococcus/Rhodococcus indonesiensis/Rhodococcus ruber BKS 20-38	0	1261	1261	1	1261	1	1261	1260	0.9992	1	1	1	0		WP_003936632;WP_003936632;WP_003936632	2448	gyrA	1830	WP_040273113
ENBDON_00014	MULTISPECIES: intein-containing DNA gyrase subunit A	MTDTTLPPEGPGHDRIEPVDIQQEMQSSYIDYAMSVIVGRALPDVRDGLKPVHRRVLYAMYDNGFRPDRGYVKSARAVAETMGNYHPHGDASIYDTLVRLAQPWSMRYPLVDGQGNFGSRGNDGAAAMRYCVPGDTLVRMPHGQSIRISEILPGVEPDSDNEIDLKVLDRHGNPVMAEMLFHSGTHRTYTLSTVEGYEMRGTANHPVLCLVDVAGVPTLLWKLLDEIRSGDRVVLQRVPSAEEHGRHNEYEAAAALLLGAFVSEGFVSENRAGFNNLDRDFFDRVVDAFDRVVGGRRYVYSRVSKSGSTLHELDVQDLTMLRRSVLADVIGQRSDHKSVPDFIWESPTPLKRIFLGALFEGDGSCSSLPRNTVQVSYSTRSMQLAKDVQQLLLEFGVVS…	1261	20	0	0.9414	/data/input/nr_20241120.dmnd																			EME64441.1 DNA gyrase subunit A [Rhodococcus ruber BKS 20-38]/MDM7489172.1 intein-containing DNA gyrase subunit A [Rhodococcus indonesiensis]/MULTISPECIES: intein-containing DNA gyrase subunit A [Rhodococcus]	Rhodococcus/Rhodococcus indonesiensis/Rhodococcus ruber BKS 20-38	0	1261	1261	1	1261	1	1261	1260	0.9992	1	1	1	0		WP_003936632;WP_003936632;WP_003936632	2448	gyrA	1830	WP_040273113
ENBDON_00014	MULTISPECIES: intein-containing DNA gyrase subunit A	MTDTTLPPEGPGHDRIEPVDIQQEMQSSYIDYAMSVIVGRALPDVRDGLKPVHRRVLYAMYDNGFRPDRGYVKSARAVAETMGNYHPHGDASIYDTLVRLAQPWSMRYPLVDGQGNFGSRGNDGAAAMRYCVPGDTLVRMPHGQSIRISEILPGVEPDSDNEIDLKVLDRHGNPVMAEMLFHSGTHRTYTLSTVEGYEMRGTANHPVLCLVDVAGVPTLLWKLLDEIRSGDRVVLQRVPSAEEHGRHNEYEAAAALLLGAFVSEGFVSENRAGFNNLDRDFFDRVVDAFDRVVGGRRYVYSRVSKSGSTLHELDVQDLTMLRRSVLADVIGQRSDHKSVPDFIWESPTPLKRIFLGALFEGDGSCSSLPRNTVQVSYSTRSMQLAKDVQQLLLEFGVVS…	1261	20	0	0.9414	/data/input/nr_20241120.dmnd																			EME64441.1 DNA gyrase subunit A [Rhodococcus ruber BKS 20-38]/MDM7489172.1 intein-containing DNA gyrase subunit A [Rhodococcus indonesiensis]/MULTISPECIES: intein-containing DNA gyrase subunit A [Rhodococcus]	Rhodococcus/Rhodococcus indonesiensis/Rhodococcus ruber BKS 20-38	0	1261	1261	1	1261	1	1261	1260	0.9992	1	1	1	0		WP_003936632;WP_003936632;WP_003936632	2448	G352_12699	1278076	WP_003936632
ENBDON_00014	MULTISPECIES: intein-containing DNA gyrase subunit A	MTDTTLPPEGPGHDRIEPVDIQQEMQSSYIDYAMSVIVGRALPDVRDGLKPVHRRVLYAMYDNGFRPDRGYVKSARAVAETMGNYHPHGDASIYDTLVRLAQPWSMRYPLVDGQGNFGSRGNDGAAAMRYCVPGDTLVRMPHGQSIRISEILPGVEPDSDNEIDLKVLDRHGNPVMAEMLFHSGTHRTYTLSTVEGYEMRGTANHPVLCLVDVAGVPTLLWKLLDEIRSGDRVVLQRVPSAEEHGRHNEYEAAAALLLGAFVSEGFVSENRAGFNNLDRDFFDRVVDAFDRVVGGRRYVYSRVSKSGSTLHELDVQDLTMLRRSVLADVIGQRSDHKSVPDFIWESPTPLKRIFLGALFEGDGSCSSLPRNTVQVSYSTRSMQLAKDVQQLLLEFGVVS…	1261	20	0	0.9414	/data/input/nr_20241120.dmnd																			EME64441.1 DNA gyrase subunit A [Rhodococcus ruber BKS 20-38]/MDM7489172.1 intein-containing DNA gyrase subunit A [Rhodococcus indonesiensis]/MULTISPECIES: intein-containing DNA gyrase subunit A [Rhodococcus]	Rhodococcus/Rhodococcus indonesiensis/Rhodococcus ruber BKS 20-38	0	1261	1261	1	1261	1	1261	1260	0.9992	1	1	1	0		WP_003936632;WP_003936632;WP_003936632	2448	AFM11_14625	59750	WP_067849882
ENBDON_00014	MULTISPECIES: intein-containing DNA gyrase subunit A	MTDTTLPPEGPGHDRIEPVDIQQEMQSSYIDYAMSVIVGRALPDVRDGLKPVHRRVLYAMYDNGFRPDRGYVKSARAVAETMGNYHPHGDASIYDTLVRLAQPWSMRYPLVDGQGNFGSRGNDGAAAMRYCVPGDTLVRMPHGQSIRISEILPGVEPDSDNEIDLKVLDRHGNPVMAEMLFHSGTHRTYTLSTVEGYEMRGTANHPVLCLVDVAGVPTLLWKLLDEIRSGDRVVLQRVPSAEEHGRHNEYEAAAALLLGAFVSEGFVSENRAGFNNLDRDFFDRVVDAFDRVVGGRRYVYSRVSKSGSTLHELDVQDLTMLRRSVLADVIGQRSDHKSVPDFIWESPTPLKRIFLGALFEGDGSCSSLPRNTVQVSYSTRSMQLAKDVQQLLLEFGVVS…	1261	20	0	0.9414	/data/input/nr_20241120.dmnd																			EME64441.1 DNA gyrase subunit A [Rhodococcus ruber BKS 20-38]/MDM7489172.1 intein-containing DNA gyrase subunit A [Rhodococcus indonesiensis]/MULTISPECIES: intein-containing DNA gyrase subunit A [Rhodococcus]	Rhodococcus/Rhodococcus indonesiensis/Rhodococcus ruber BKS 20-38	0	1261	1261	1	1261	1	1261	1260	0.9992	1	1	1	0		WP_003936632;WP_003936632;WP_003936632	2448	AFM11_14625	59750	WP_067849882
ENBDON_00014	MULTISPECIES: intein-containing DNA gyrase subunit A	MTDTTLPPEGPGHDRIEPVDIQQEMQSSYIDYAMSVIVGRALPDVRDGLKPVHRRVLYAMYDNGFRPDRGYVKSARAVAETMGNYHPHGDASIYDTLVRLAQPWSMRYPLVDGQGNFGSRGNDGAAAMRYCVPGDTLVRMPHGQSIRISEILPGVEPDSDNEIDLKVLDRHGNPVMAEMLFHSGTHRTYTLSTVEGYEMRGTANHPVLCLVDVAGVPTLLWKLLDEIRSGDRVVLQRVPSAEEHGRHNEYEAAAALLLGAFVSEGFVSENRAGFNNLDRDFFDRVVDAFDRVVGGRRYVYSRVSKSGSTLHELDVQDLTMLRRSVLADVIGQRSDHKSVPDFIWESPTPLKRIFLGALFEGDGSCSSLPRNTVQVSYSTRSMQLAKDVQQLLLEFGVVS…	1261	20	0	0.9414	/data/input/nr_20241120.dmnd																			EME64441.1 DNA gyrase subunit A [Rhodococcus ruber BKS 20-38]/MDM7489172.1 intein-containing DNA gyrase subunit A [Rhodococcus indonesiensis]/MULTISPECIES: intein-containing DNA gyrase subunit A [Rhodococcus]	Rhodococcus/Rhodococcus indonesiensis/Rhodococcus ruber BKS 20-38	0	1261	1261	1	1261	1	1261	1260	0.9992	1	1	1	0		WP_003936632;WP_003936632;WP_003936632	2448	AFM11_14625	59750	WP_067849882
ENBDON_00014	MULTISPECIES: intein-containing DNA gyrase subunit A	MTDTTLPPEGPGHDRIEPVDIQQEMQSSYIDYAMSVIVGRALPDVRDGLKPVHRRVLYAMYDNGFRPDRGYVKSARAVAETMGNYHPHGDASIYDTLVRLAQPWSMRYPLVDGQGNFGSRGNDGAAAMRYCVPGDTLVRMPHGQSIRISEILPGVEPDSDNEIDLKVLDRHGNPVMAEMLFHSGTHRTYTLSTVEGYEMRGTANHPVLCLVDVAGVPTLLWKLLDEIRSGDRVVLQRVPSAEEHGRHNEYEAAAALLLGAFVSEGFVSENRAGFNNLDRDFFDRVVDAFDRVVGGRRYVYSRVSKSGSTLHELDVQDLTMLRRSVLADVIGQRSDHKSVPDFIWESPTPLKRIFLGALFEGDGSCSSLPRNTVQVSYSTRSMQLAKDVQQLLLEFGVVS…	1261	20	0	0.9414	/data/input/nr_20241120.dmnd																			EME64441.1 DNA gyrase subunit A [Rhodococcus ruber BKS 20-38]/MDM7489172.1 intein-containing DNA gyrase subunit A [Rhodococcus indonesiensis]/MULTISPECIES: intein-containing DNA gyrase subunit A [Rhodococcus]	Rhodococcus/Rhodococcus indonesiensis/Rhodococcus ruber BKS 20-38	0	1261	1261	1	1261	1	1261	1260	0.9992	1	1	1	0		WP_003936632;WP_003936632;WP_003936632	2448	A5740_10835	1834154	WP_076195920
ENBDON_00014	MULTISPECIES: intein-containing DNA gyrase subunit A	MTDTTLPPEGPGHDRIEPVDIQQEMQSSYIDYAMSVIVGRALPDVRDGLKPVHRRVLYAMYDNGFRPDRGYVKSARAVAETMGNYHPHGDASIYDTLVRLAQPWSMRYPLVDGQGNFGSRGNDGAAAMRYCVPGDTLVRMPHGQSIRISEILPGVEPDSDNEIDLKVLDRHGNPVMAEMLFHSGTHRTYTLSTVEGYEMRGTANHPVLCLVDVAGVPTLLWKLLDEIRSGDRVVLQRVPSAEEHGRHNEYEAAAALLLGAFVSEGFVSENRAGFNNLDRDFFDRVVDAFDRVVGGRRYVYSRVSKSGSTLHELDVQDLTMLRRSVLADVIGQRSDHKSVPDFIWESPTPLKRIFLGALFEGDGSCSSLPRNTVQVSYSTRSMQLAKDVQQLLLEFGVVS…	1261	20	0	0.9414	/data/input/nr_20241120.dmnd																			EME64441.1 DNA gyrase subunit A [Rhodococcus ruber BKS 20-38]/MDM7489172.1 intein-containing DNA gyrase subunit A [Rhodococcus indonesiensis]/MULTISPECIES: intein-containing DNA gyrase subunit A [Rhodococcus]	Rhodococcus/Rhodococcus indonesiensis/Rhodococcus ruber BKS 20-38	0	1261	1261	1	1261	1	1261	1260	0.9992	1	1	1	0		WP_003936632;WP_003936632;WP_003936632	2448	A5740_10835	1834154	WP_076195920
ENBDON_00014	MULTISPECIES: intein-containing DNA gyrase subunit A	MTDTTLPPEGPGHDRIEPVDIQQEMQSSYIDYAMSVIVGRALPDVRDGLKPVHRRVLYAMYDNGFRPDRGYVKSARAVAETMGNYHPHGDASIYDTLVRLAQPWSMRYPLVDGQGNFGSRGNDGAAAMRYCVPGDTLVRMPHGQSIRISEILPGVEPDSDNEIDLKVLDRHGNPVMAEMLFHSGTHRTYTLSTVEGYEMRGTANHPVLCLVDVAGVPTLLWKLLDEIRSGDRVVLQRVPSAEEHGRHNEYEAAAALLLGAFVSEGFVSENRAGFNNLDRDFFDRVVDAFDRVVGGRRYVYSRVSKSGSTLHELDVQDLTMLRRSVLADVIGQRSDHKSVPDFIWESPTPLKRIFLGALFEGDGSCSSLPRNTVQVSYSTRSMQLAKDVQQLLLEFGVVS…	1261	20	0	0.9414	/data/input/nr_20241120.dmnd																			EME64441.1 DNA gyrase subunit A [Rhodococcus ruber BKS 20-38]/MDM7489172.1 intein-containing DNA gyrase subunit A [Rhodococcus indonesiensis]/MULTISPECIES: intein-containing DNA gyrase subunit A [Rhodococcus]	Rhodococcus/Rhodococcus indonesiensis/Rhodococcus ruber BKS 20-38	0	1261	1261	1	1261	1	1261	1260	0.9992	1	1	1	0		WP_003936632;WP_003936632;WP_003936632	2448	AFM11_14625	59750	WP_067849882
ENBDON_00015	DUF3566 domain-containing protein	MSTPQGPNGAEQPPKGQNGREVPGKPAGGATPSDGAARNPGAGANPGVPADGTAKPQTAEGGTSRPGQQRPGGPPTPPWQRGNQQETPQNVPQTNLARPGQASPSTGRPAVPTPSDTPGDKPAARPGTDPAGSAQPGGQTPGGQKQGGQQPGPAKQAAARSGGNPAGNRPGAATPPTRPVVTGTAAASMNAPTAGADRSAAKTKAAVIDGPTRHIERKDLAKDLPDLSTVKHPLPSAPAEEAPAAQPAAAVATAAPVAGEPLRATVQVRRIDPWSMLKISSVISVSLFFVWMVAVGLLYGVLEGMGVWERLNSAFTDMVSDTGGGGLITAGQVFGYATVIGLVNTILFTALATLGAFIYNLCTDLVGGVQVTLADPD	377	20	1.9e-151	0.8161	/data/input/nr_20241120.dmnd	DUF3566 domain-containing protein [Rhodococcus ruber]/EME64440.1 hypothetical protein G352_12694 [Rhodococcus ruber BKS 20-38]	Rhodococcus ruber/Rhodococcus ruber BKS 20-38	1.9e-151	372	377	1	372	1	377	306	0.8117	1.0134	1	1	0		WP_003936631/WP_003936631	442	DUF3566 domain-containing protein [Rhodococcus ruber]/EME64440.1 hypothetical protein G352_12694 [Rhodococcus ruber BKS 20-38]	Rhodococcus ruber/Rhodococcus ruber BKS 20-38	1.9e-151	372	377	1	372	1	377	306	0.8117	1.0134	1	1	0		WP_003936631;WP_003936631	442	Z051_00485	1441923	KOS58224		GO:0016020-IEA	membrane-IEA
ENBDON_00015	DUF3566 domain-containing protein	MSTPQGPNGAEQPPKGQNGREVPGKPAGGATPSDGAARNPGAGANPGVPADGTAKPQTAEGGTSRPGQQRPGGPPTPPWQRGNQQETPQNVPQTNLARPGQASPSTGRPAVPTPSDTPGDKPAARPGTDPAGSAQPGGQTPGGQKQGGQQPGPAKQAAARSGGNPAGNRPGAATPPTRPVVTGTAAASMNAPTAGADRSAAKTKAAVIDGPTRHIERKDLAKDLPDLSTVKHPLPSAPAEEAPAAQPAAAVATAAPVAGEPLRATVQVRRIDPWSMLKISSVISVSLFFVWMVAVGLLYGVLEGMGVWERLNSAFTDMVSDTGGGGLITAGQVFGYATVIGLVNTILFTALATLGAFIYNLCTDLVGGVQVTLADPD	377	20	1.9e-151	0.8161	/data/input/nr_20241120.dmnd	DUF3566 domain-containing protein [Rhodococcus indonesiensis]/MDM7489173.1 DUF3566 domain-containing protein [Rhodococcus indonesiensis]	Rhodococcus indonesiensis/Rhodococcus indonesiensis	8.5e-143	372	377	1	372	1	377	336	0.8912	1.0134	1	1	0		WP_289379254	421	DUF3566 domain-containing protein [Rhodococcus ruber]/EME64440.1 hypothetical protein G352_12694 [Rhodococcus ruber BKS 20-38]	Rhodococcus ruber/Rhodococcus ruber BKS 20-38	1.9e-151	372	377	1	372	1	377	306	0.8117	1.0134	1	1	0		WP_003936631;WP_003936631	442	OCS65_01155	191292	WP_043799099
ENBDON_00015	DUF3566 domain-containing protein	MSTPQGPNGAEQPPKGQNGREVPGKPAGGATPSDGAARNPGAGANPGVPADGTAKPQTAEGGTSRPGQQRPGGPPTPPWQRGNQQETPQNVPQTNLARPGQASPSTGRPAVPTPSDTPGDKPAARPGTDPAGSAQPGGQTPGGQKQGGQQPGPAKQAAARSGGNPAGNRPGAATPPTRPVVTGTAAASMNAPTAGADRSAAKTKAAVIDGPTRHIERKDLAKDLPDLSTVKHPLPSAPAEEAPAAQPAAAVATAAPVAGEPLRATVQVRRIDPWSMLKISSVISVSLFFVWMVAVGLLYGVLEGMGVWERLNSAFTDMVSDTGGGGLITAGQVFGYATVIGLVNTILFTALATLGAFIYNLCTDLVGGVQVTLADPD	377	20	1.9e-151	0.8161	/data/input/nr_20241120.dmnd	DUF3566 domain-containing protein [Rhodococcus ruber]/MBP2214180.1 hypothetical protein [Rhodococcus ruber]	Rhodococcus ruber/Rhodococcus ruber	4.6e-139	378	383	1	378	1	377	336	0.8773	1.0132	1.0159	1	0		WP_210063152	411	DUF3566 domain-containing protein [Rhodococcus ruber]/EME64440.1 hypothetical protein G352_12694 [Rhodococcus ruber BKS 20-38]	Rhodococcus ruber/Rhodococcus ruber BKS 20-38	1.9e-151	372	377	1	372	1	377	306	0.8117	1.0134	1	1	0		WP_003936631;WP_003936631	442
ENBDON_00015	DUF3566 domain-containing protein	MSTPQGPNGAEQPPKGQNGREVPGKPAGGATPSDGAARNPGAGANPGVPADGTAKPQTAEGGTSRPGQQRPGGPPTPPWQRGNQQETPQNVPQTNLARPGQASPSTGRPAVPTPSDTPGDKPAARPGTDPAGSAQPGGQTPGGQKQGGQQPGPAKQAAARSGGNPAGNRPGAATPPTRPVVTGTAAASMNAPTAGADRSAAKTKAAVIDGPTRHIERKDLAKDLPDLSTVKHPLPSAPAEEAPAAQPAAAVATAAPVAGEPLRATVQVRRIDPWSMLKISSVISVSLFFVWMVAVGLLYGVLEGMGVWERLNSAFTDMVSDTGGGGLITAGQVFGYATVIGLVNTILFTALATLGAFIYNLCTDLVGGVQVTLADPD	377	20	1.9e-151	0.8161	/data/input/nr_20241120.dmnd	MULTISPECIES: DUF3566 domain-containing protein [Rhodococcus]/MDO2379407.1 DUF3566 domain-containing protein [Rhodococcus ruber]/AXY49478.1 hypothetical protein YT1_0018 [Rhodococcus ruber]/UQB72917.1 DUF3566 domain-containing protein [Rhodococcus ruber]/WKK10997.1 DUF3566 domain-containing protein [Rhodococcus ruber]/WML62808.1 DUF3566 domain-containing protein [Rhodococcus sp. AH-ZY2]	Rhodococcus/Rhodococcus ruber/Rhodococcus ruber/Rhodococcus ruber/Rhodococcus ruber/Rhodococcus sp. AH-ZY2	1.5e-138	383	383	1	383	1	377	338	0.8825	1	1.0159	1	0		WP_119699207/WP_119699207/WP_119699207	410	DUF3566 domain-containing protein [Rhodococcus ruber]/EME64440.1 hypothetical protein G352_12694 [Rhodococcus ruber BKS 20-38]	Rhodococcus ruber/Rhodococcus ruber BKS 20-38	1.9e-151	372	377	1	372	1	377	306	0.8117	1.0134	1	1	0		WP_003936631;WP_003936631	442
ENBDON_00015	DUF3566 domain-containing protein	MSTPQGPNGAEQPPKGQNGREVPGKPAGGATPSDGAARNPGAGANPGVPADGTAKPQTAEGGTSRPGQQRPGGPPTPPWQRGNQQETPQNVPQTNLARPGQASPSTGRPAVPTPSDTPGDKPAARPGTDPAGSAQPGGQTPGGQKQGGQQPGPAKQAAARSGGNPAGNRPGAATPPTRPVVTGTAAASMNAPTAGADRSAAKTKAAVIDGPTRHIERKDLAKDLPDLSTVKHPLPSAPAEEAPAAQPAAAVATAAPVAGEPLRATVQVRRIDPWSMLKISSVISVSLFFVWMVAVGLLYGVLEGMGVWERLNSAFTDMVSDTGGGGLITAGQVFGYATVIGLVNTILFTALATLGAFIYNLCTDLVGGVQVTLADPD	377	20	1.9e-151	0.8161	/data/input/nr_20241120.dmnd	MULTISPECIES: DUF3566 domain-containing protein [Rhodococcus]/ATQ30124.1 hypothetical protein CS378_16145 [Rhodococcus ruber]/AUM19145.1 hypothetical protein CSW53_22940 [Rhodococcus ruber]/MCF8784757.1 DUF3566 domain-containing protein [Rhodococcus ruber]/MDO1480824.1 hypothetical protein [Rhodococcus ruber]/MDV3206871.1 DUF3566 domain-containing protein [Rhodococcus ruber]	Rhodococcus/Rhodococcus ruber/Rhodococcus ruber/Rhodococcus ruber/Rhodococcus ruber/Rhodococcus ruber	2.6e-138	378	383	1	378	1	377	340	0.8877	1.0132	1.0159	1	0		WP_082752480/WP_082752480	409	DUF3566 domain-containing protein [Rhodococcus ruber]/EME64440.1 hypothetical protein G352_12694 [Rhodococcus ruber BKS 20-38]	Rhodococcus ruber/Rhodococcus ruber BKS 20-38	1.9e-151	372	377	1	372	1	377	306	0.8117	1.0134	1	1	0		WP_003936631;WP_003936631	442
[truncated: 136,002 more rows]
[truncated: 14 more columns]
