# Supplementary material for: Whole Genome of Petroleum Hydrocarbon Degrading Rhodococcus indonesiensis isolated from Nacharam, Hyderabad, India
Source: Research Square preprint supplement (doi:10.21203/rs.3.rs-6309542/v1), 2025-09-26
Supplement: Supplementary file 11 [file a1463c3ab17da927f6dc038e.docx]

**Table 2: Petroleum Hydrocarbon Degradation Genes**

| ***S.No*** | ***Gene*** | **Organism** | **Reference** |
| --- | --- | --- | --- |
|  | *rdhAB* | *Deltaproteobacteria* | [1] |
|  | *TouADE* | *Pseudomonas stutzeri OX1* | [2] |
|  | *TbuA1/ToA* | *Burkholderia pickettii PKO1* | [3] |
|  | *aceA* | *M. tuberculosis* | [4] |
|  | *aceB* | *M. tuberculosis* | [4] |
|  | *icl* | *M. avium* | [4] |
|  | *bssABC* | *Deltaproteobacterial Strain NaphS2* | [5] |
|  | *trfA* | *C. metallidurans* | [6] |
|  | *GcdAD* | *Azoarcus evansii* | [7] |
|  | *IpbA* | *Firmicutes, Desulfobacterota_B* | [8] |
|  | *K27540* | *Firmicutes, Desulfobacterota_B* | [8] |
|  | *AbcA_1* | *Nitrospinota_B* | [8] |
|  | *mpdBC* | *M. austroafricanum.* | [8] |
|  | *ndoBC* | *Acinetobacter, Proteobacteria, Acidobacteria* | [8] |
|  | *PoxE/DmpO* | *Proteobacteria* | [8] |
|  | *AlmA_III* | *Proteobacteria* | [8] |
|  | *TmoB_BmoB* | *Proteobacteria* | [8] |
|  | *TmoA_BmoA* | *Acinetobacter, Proteobacteria* | [8] |
|  | *tomA1* | *Acinetobacter****,*** *Proteobacteria* | [8] |
|  | *tomA3* | *Acinetobacter, Proteobacteria* | [8] |
|  | *tomA4* | *Acinetobacter, Proteobacteria* | [8] |
|  | *akbA1A2A3* | *Rhodococcus sp. Strain DK17* | [9] |
|  | *akbCD* | *Rhodococcus sp. Strain DK17* | [9] |
|  | *akbEF* | *Rhodococcus sp. Strain DK17* | [9] |
|  | *hbs* | *Geotalea daltonii strain FRC-32* | [10] |
|  | *bmoR* | *P. butanovora* | [11] |
|  | *bbsABDHEG,* | *Thauera aromatica* | [12] |
|  | *eps* | *Geobacillus thermodenitrificans NG80-2* | [13] |
|  | *non_NdoB_type* | *Acinetobacter, Proteobacteria* | [14] |
|  | *pdoA2* | *Terrabacter sp. HH4* | [14] |
|  | *dntAc* | *Burkholderia sp.* | [14] |
|  | *phnA1* | *Cycloclasticus spp.* | [14] |
|  | *Pah-NdoC* | *Proteobacteria* | [14] |
|  | *PahB* | *Proteobacteria*. | [14] |
|  | *PahC* | *Proteobacteria*. | [14] |
|  | *PahD* | *Proteobacteria*. | [14] |
|  | *PahF* | *Proteobacteria*. | [14] |
|  | *pahE* | *Sphingomonas* | [15] |
|  | *aupA* | *Marinobacter hydrocarbonoclasticus SP1* | [16] |
|  | *aupB* | *Marinobacter hydrocarbonoclasticus SP17.* | [16] |
|  | *tauD* | *A. oleivorans DR1* | [16] |
|  | *sadABCD* | *Acinetobacter sp. strain NyZ410* | [17] |
|  | *laoABC* | *Pseudomonas aeruginosa* | [18] |
|  | *pobMO* | *Bacterial community* | [19] |
|  | *DitA1* | *Pseudomonas abietaniphila BKME-9* | [20], [21] |
|  | *dah* | *Clostridium butyricum* | [22] |
|  | *AcsD* | *Bacterial community* | [23] |
|  | *mno* | *Actinobacteria* | [24] |
|  | *pnp* | *Trichoderma virens A701* | [25] |
|  | *cgo* | *Trichoderma virens A701* | [25] |
|  | *PXY* | *Enterobacter sp. NCCP-607* | [25] |
|  | *ECJ* | *Enterobacter sp. NCCP-607* | [25] |
|  | *ebw* | *Enterobacter sp. NCCP-607* | [25] |
|  | *AALB* | *Klebsiella aerogene* | [25] |
|  | *dnaA* | *K. aerogenes* | [25] |
|  | *ECE* | *Klebsiella aerogene* | [25] |
|  | *ECO* | *Klebsiella aerogenes strain 77* | [25] |
|  | *HAS* | *Klebsiella aerogenes strain M24* | [25] |
|  | *PON* | *Klebsiella aerogenes strain M24* | [25] |
|  | *PYG* | *Klebsiella aerogenes strain M24* | [25] |
|  | *RRO* | *Klebsiella aerogenes strain M242* | [25] |
|  | *ECD* | *Klebsiella aerogenes strain UISO178* | [25] |
|  | *CSAB* | *Klebsiella aerogenes strain M242* | [25] |
|  | *EDEM1* | *Klebsiella aerogenes strain M242* | [25] |
|  | *GGO* | *Klebsiella aerogenes strain M242* | [25] |
|  | *glgP* | *Klebsiella aerogenes strain M242* | [25] |
|  | *MCF* | *Klebsiella aerogenes strain M242* | [25] |
|  | *NLE* | *Klebsiella aerogenes strain M242* | [25] |
|  | *PTR* | *Klebsiella aerogenes strain M242* | [25] |
|  | *adh2* | *Proteobacteria* | [26] |
|  | *cpnA* | *Proteobacteria* | [26] |
|  | *carAa* | *Acinetobacter baumannii* | [27] |
|  | *poxA* | *Sphingomonas paucimobilis* | [27] |
|  | *acmAB* | *Streptobacillus* | [27] |
|  | *badA* | *Bacillus cereus* | [27] |
|  | *etbAa* | *Pseudomonas putida* | [27] |
|  | *hcaE* | *Rhodococcus* | [27] |
|  | *hmgA* | *Sphingomonas* | [27] |
|  | *nahAa* | *Pseudomonas fluorescens* | [27] |
|  | *phdF* | *Rhodococcus erythropolis* | [27] |
|  | *prmABCD* | *Achromobacter* | [27] |
|  | *tphA2* | *Ralstonia eutropha* | [27] |
|  | *chqB* | *Pseudomonas aeruginosa* | [27], [28] |
|  | *pobA,* | *Chromohalobacter sp.HS-2* | [27], [29] |
|  | *alkS* | *P. putida GPo1* | [30] |
|  | *todC1* | *P. putida F39/D* | [31] |
|  | *ladA* | *Acinetobacter oleivorans DR1* | [32] |
|  | *poxB/DmpL* | Bacterial community | [33] |
|  | *bsdCD* | *Lentibacter* | [33] |
|  | *tmoABC1C2* | *Ca. Thioglobus* | [33] |
|  | *xylAM* | *Planktomarina* | [33] |
|  | *adh* | *Pseudooceanicola* | [33] |
|  | *adhP* | *Bradyrhizobium* | [33] |
|  | *ALDH* | *Roseobacter* | [33] |
|  | *cymAab* | *Sphingomonas* | [33] |
|  | *dmpKLMNOP* | *Rhodobacter* | [33] |
|  | *hcaB* | *Pelagibacter* | [33] |
|  | *hcaCDEF* | *Variovorax* | [33] |
|  | *HPGDS* | *Epibacterium* | [33] |
|  | *pchCF* | *Sulfitobacter* | [33] |
|  | *ped* | *Epibacterium* | [33] |
|  | *rubB* | *Bradyrhizobium* | [33] |
|  | *salDH* | *Colwellia* | [33] |
|  | *sdh* | *Pelagibacter* | [33] |
|  | *todABC1C2* | *Octadecabacter* | [33] |
|  | *yaiY* | *Fibrobacter* | [33] |
|  | *chnB* | *Acidovorax sp.* | [33], [34] |
|  | *bmoBCDXYZ* | *Ca. C. aromaticivorans and N. japonica.* | [35] |
|  | *Cym* | *Pseudomonas putida* F1 | [36] |
|  | *frmA* | Bacterial community | [37] |
|  | *ndo* | *Pseudomonas putida NCIB 9816* | [38] |
|  | *pedA* | *Aromatoleum aromaticum EbN1* | [39] |
|  | *bzdN* | *Desulfosarcina ovata* | [39] |
|  | *etbA* | *Aromatoleum sp. strain HxN1* | [39] |
|  | *mcrA* | *Desulfobacterium cetonicum* | [39] |
|  | *nmsA* | *Desulfatibacillum aliphaticivorans* | [39] |
|  | *Acx* | *A. aromaticum EbN1* | [39] |
|  | *bamB* | *Pelobacter acetylenicus* | [39] |
|  | *TutD* | *T. aromatica T1* | [39] |
|  | *ahpCF* | *Bacteroides fragilis* | [40] |
|  | *ndoB* | *Burkholderia* | [41] |
|  | *RHA1* | *Rhodococcus sp.* | [42] |
|  | *mpdBC* | *M. austroafricanum.* | [43] |
|  | *omcS* | *Anaeromyxobacter dehalogens* | [43] |
|  | *xecADC* | *Xanthobacter autotrophicus Py2* | [43] |
|  | *amoABCD* | *Nocardia corallina B-276* | [43] |
|  | *etnE* | *Mycolicibacterium rhodesiae* | [43] |
|  | *isoABCDEHI* | *Rhodococcus sp. AD45* | [43] |
|  | *mtaABC* | Bacterial community | [44] |
|  | *cdhCDE* | Bacterial community | [44] |
|  | *ndhABCD* | Bacterial community | [44] |
|  | *nuoABCD* | Bacterial community | [44] |
|  | *abmA* | *Paenarthrobacter sp* | [45] |
|  | *antABC* | *Paenarthrobacter sp* | [45] |
|  | *CHMO* | *P. aeruginosa GOM9* | [45] |
|  | *ahpC* | *Pseudomonas aeruginosa GOM9, Alloalcanivorax xenomutans GOM5, Paenarthrobacter sp. GOM3* | [45] |
|  | *SrfAB* | *Pseudomonas aeruginosa GOM9, Paenarthrobacter sp. GOM3* | [45] |
|  | *pacL* | *Azoarcus evansii* | [46] |
|  | *napAGH* | *Pseudomonas sp.* SL-6 | [47] |
|  | *fid* | *Sphingomonas sp.LB126* | [48] |
|  | *aliB* | *Pseudomonas aeruginosa* | [49] |
|  | *pheB* | *Pseudomonas spp.* | [50] |
|  | *bcr* | *Magnetospirillum sp.* | [51] |
|  | *ahyA* | *A. aromaticum strain EbN1* | [52] |
|  | *AhyABC* | *D. oleovorans* | [52] |
|  | *dhaB1* | *Clostridium butyricum* | [53] |
|  | *dmpB* | *Comamonas testosteroni TA441* | [54] |
|  | *dmpD* | *Comamonas testosteroni TA441* | [54] |
|  | *nahI* | *Pseudomonas fluorescens* | [55] |
|  | *nahJ* | *Pseudomonas fluorescens* | [55] |
|  | *nahK* | *Pseudomonas fluorescens* | [55] |
|  | *nahM* | *Pseudomonas fluorescens* | [55] |
|  | *nahN* | *Pseudomonas fluorescens* | [55] |
|  | *nahI* | *Pseudomonas* | [55] |
|  | *xylM* | *Pseudomonas putida mt-2* | [56] |
|  | *bphA1* | *Pseudoxanthomonas* | [56] |
|  | *tmoA* | *Acidobacteria, Chloroflexota, Cyanobacteria,* | [56] |
|  | *NnrA* | *Tectomicrobia (Entotheonella)* | [56] |
|  | *pheA* | *Pseudomonas stutzeri* | [56] |
|  | *dhnA1* | *Sphingomonas wittichii* | [56] |
|  | *infB* | *Enterobacter turicensis* | [57] |
|  | *rpoB* | *Enterobacter pulveris* | [57] |
|  | *pheC* | *Geobacillus thermoglucosidasius* | [58] |
|  | *EDO* | *Pseudomonas sp.* | [58] |
|  | *nag* | *Ralstonia sp.* | [58] |
|  | *BaaA* | *Rhodococcus* | [59] |
|  | *assABC* | *Azoarcus* | [60] |
|  | *RHD-1* | *Cycloclasticus* sp. P1 | [60] |
|  | *RHD-4* | *Cycloclasticus* sp. P1 | [60] |
|  | Q91_0344 | *Cycloclasticus* sp. P1 | [60] |
|  | Q91_0507 | *Cycloclasticus* sp. P1 | [60] |
|  | Q91_0872 | *Cycloclasticus* sp. P1 | [60] |
|  | Q91_1047 | *Cycloclasticus* sp. P1 | [60] |
|  | Q91_2224 | *Cycloclasticus* sp. P1 | [60] |
|  | Q91_2225 and Q91_2226 (RHD-3) | *Cycloclasticus* sp. P1 | [60] |
|  | Q91_2228 | *Cycloclasticus* sp. P1 | [60] |
|  | *alkMaMb* | *Acinetobacter venetianus* | [61] |
|  | *xcpS* | *A. baylyi ADP1* | [61] |
|  | *alkB* | *Rhodococcus* | [62] |
|  | *CYP153* | *R. erythropolis* | [62] |
|  | *pAH2* | *R. erythropolis* | [62] |
|  | *pelA* | Bacteria consortia | [63] |
|  | *pelB* | Bacteria consortia | [63] |
|  | *PelC* | Bacteria consortia | [63] |
|  | *pelE* | Bacteria consortia | [63] |
|  | *PelD* | *Erwinia chrysanthemi 3937* | [63] |
|  | *phaC* | *Gordonia rubripertinctus 7E1C* | [63] |
|  | *cmdABC* | *Ar. bremense PbN1and Ar. aromaticum EbN1* | [64] |
|  | *iod* | *Desulfosporosinus youngiae* | [64] |
|  | *bamQ* | *Rhodopseudomonas palustris* | [64] |
|  | *CHCoA dehydrogenase* | *G. metallireducens* | [64] |
|  | *DrsA* | *Geobacteraceae* | [64] |
|  | *pimB* | *R. palustri* | [64] |
|  | *pimE* | *R. palustri* | [64] |
|  | *alkB1* | *Rhodococcus spp.* | [65] |
|  | *alkB2* | *Rhodococcus spp.* | [65] |
|  | *alkBFGHJKL* | *Pseudomonas putida GPo1* | [65] |
|  | *soxXYZABC* | *Alphaproteobacteria* | [65] |
|  | *AlkT* | *Alphaproteobacteria* | [65] |
|  | *ompS* | *A. dieselolei* | [65] |
|  | *norBC* | *Dokdonia* | [65] |
|  | *aprAB* | *Syntrophales, Desulfobacteraceae, Abyssubacteria* | [66] |
|  | *dsrAB* | *Desulfatiglandales, Abyssubacteria* | [66] |
|  | *tsdA* | *Flavobacteria* | [66] |
|  | *oleC* | *Deltaproteobacteria* | [66] |
|  | *nagL* | *Shewanella* | [67] |
|  | *qui* | *Cobetia* | [67] |
|  | *fadL* | *A. dieselolei B-5* | [68] |
|  | *tlpS* | *Pseudomonas aeruginosa PAO1* | [68] |
|  | *arhABC* | *Pseudomonas stutzeri ZWLR2-1* | [68] |
|  | *alkN* | *P. putida GPo1* | [68] |
|  | *Cyo* | *P. putida.* | [68] |
|  | *nabK* | *P. pudida* | [68] |
|  | *tnpA6* | *P. pudida* | [68] |
|  | *nar* | *Pseudomonas sp.* | [69] |
|  | *PdoAB* | *Mycobacterium sp* | [69] |
|  | *phdJ* | *Mycobacteriaceae sp.* | [69] |
|  | *nahF* | *Comamonadaceae sp* | [69] |
|  | *alkM* | *Acinetobacter sp. ADP1* | [70] |
|  | *acr* | *Syntrophoarchaeales, Alkanophagales* | [71] |
|  | *Tol4* | *Azoarcus tolulyticus* | [71] |
|  | *hdrABCD* | *C. Argoarchaeum ethanivorans* | [71] |
|  | *frdA* | *Geobacter metallireducens* | [72] |
|  | *hadA* | *Syntrophus aciditrophicus* | [72] |
|  | *cpnA* | *Rhodococcus, Mycolicibacterium, Nocardioides* | [73] |
|  | *RAG-1* | *Acinetobacter sp* | [74] |
|  | *ituABCD* | *Bacillus subtilis* | [75] |
|  | *AlnABC* | *Acinetobacter radioresistens, Bacillus sp* | [75] |
|  | *SrfAaAbAcAd* | *Acinetobacter radioresistens, Bacillus sp.* | [75] |
|  | *SrfA-TE* | *Acinetobacter* | [75] |
|  | *BAS-Cr1* | *Pseudomonas aeruginosa* | [75] |
|  | *ViscAcBCR* | *Pseudomonas fluorescens* | [75] |
|  | *amsY* | *Pseudomonas syringae* | [75] |
|  | *GacA/GacS* | *Pseudomonas syringae* | [75] |
|  | *arfABC* | *Pseudomonas sp. MIS38* | [75] |
|  | *psoA* | *Pseudomonas putida* | [75] |
|  | *psoB* | *Pseudomonas putida* | [75] |
|  | *psoC* | *Pseudomonas putida* | [75] |
|  | *fae-hps* | Methane oxidizing Bacterial community | [76] |
|  | *mtd* | Methane oxidizing Bacterial community | [76] |
|  | *fto* | Methane oxidizing Bacterial community | [76] |
|  | *mch* | Methane oxidizing Bacterial community | [76] |
|  | *ftr* | Methane oxidizing Bacterial community | [76] |
|  | *frhB* | Methane oxidizing Bacterial community | [76] |
|  | *myhD* | Methane oxidizing Bacterial community | [76] |
|  | *cdhCDG* | Methane oxidizing Bacterial community | [76] |
|  | *mcrABCG* | Methane oxidizing Bacterial community | [76] |
|  | *mtrABCDEFGH* | Methane oxidizing Bacterial community | [76] |
|  | *AlmA* | *Acinetobacter baylyi ADP1* | [77, p. 024] |
|  | *acrA* | *Ca. Methanoliparum* | [78] |
|  | *bphA1A2A3A4* | [*Sphingobium yanoikuyae B1*](https://www.sciencedirect.com/topics/immunology-and-microbiology/sphingobium) | [78] |
|  | *bphBC* | [*Sphingobium yanoikuyae B1*](https://www.sciencedirect.com/topics/immunology-and-microbiology/sphingobium) | [78] |
|  | *metF* | *Desulfobacteraceae* | [79] |

**References**

[1] S. Atashgahi, “Discovered by genomics: putative reductive dehalogenases with N-terminus transmembrane helixes,” *FEMS Microbiology Ecology*, vol. 95, no. 5, p. fiz048, May 2019, doi: 10.1093/femsec/fiz048.

[2] G. Bertoni, M. Martino, E. Galli, and P. Barbieri, “Analysis of the Gene Cluster Encoding Toluene/ *o* -Xylene Monooxygenase from *Pseudomonas stutzeri* OX1,” *Appl Environ Microbiol*, vol. 64, no. 10, pp. 3626–3632, Oct. 1998, doi: 10.1128/AEM.64.10.3626-3632.1998.

[3] A. M. Byrne and R. H. Olsen, “Cascade regulation of the toluene-3-monooxygenase operon (tbuA1UBVA2C) of Burkholderia pickettii PKO1: role of the tbuA1 promoter (PtbuA1) in the expression of its cognate activator, TbuT,” *J Bacteriol*, vol. 178, no. 21, pp. 6327–6337, Nov. 1996, doi: 10.1128/jb.178.21.6327-6337.1996.

[4] C. Zhang, “Study of Genes Relating To Degradation of Aromatic Compounds and Carbon Metabolism in Mycobacterium Sp. Strain KMS,” 2013, doi: 10.26076/6A70-3C27.

[5] R. J. DiDonato *et al.*, “Genome Sequence of the Deltaproteobacterial Strain NaphS2 and Analysis of Differential Gene Expression during Anaerobic Growth on Naphthalene,” *PLoS ONE*, vol. 5, no. 11, p. e14072, Nov. 2010, doi: 10.1371/journal.pone.0014072.

[6] B. P. Hedlund, A. D. Geiselbrecht, T. J. Bair, and J. T. Staley, “Polycyclic Aromatic Hydrocarbon Degradation by a New Marine Bacterium, *Neptunomonas naphthovorans* gen. nov., sp. nov,” *Appl Environ Microbiol*, vol. 65, no. 1, Art. no. 1, Jan. 1999, doi: 10.1128/AEM.65.1.251-259.1999.

[7] J.-W. Zhang *et al.*, “Newly discovered Asgard archaea Hermodarchaeota potentially degrade alkanes and aromatics via alkyl/benzyl-succinate synthase and benzoyl-CoA pathway,” *The ISME Journal*, vol. 15, no. 6, Art. no. 6, Jun. 2021, doi: 10.1038/s41396-020-00890-x.

[8] V. Khot *et al.*, “CANT-HYD: A Curated Database of Phylogeny-Derived Hidden Markov Models for Annotation of Marker Genes Involved in Hydrocarbon Degradation,” *Front. Microbiol.*, vol. 12, p. 764058, Jan. 2022, doi: 10.3389/fmicb.2021.764058.

[9] D. Kim *et al.*, “Identification of a Novel Dioxygenase Involved in Metabolism of *o* -Xylene, Toluene, and Ethylbenzene by *Rhodococcus* sp. Strain DK17,” *Appl Environ Microbiol*, vol. 70, no. 12, pp. 7086–7092, Dec. 2004, doi: 10.1128/AEM.70.12.7086-7092.2004.

[10] S. Kühner *et al.*, “Substrate-Dependent Regulation of Anaerobic Degradation Pathways for Toluene and Ethylbenzene in a Denitrifying Bacterium, Strain EbN1,” *J Bacteriol*, vol. 187, no. 4, Art. no. 4, Feb. 2005, doi: 10.1128/JB.187.4.1493-1503.2005.

[11] E. G. Kurth, D. M. Doughty, P. J. Bottomley, D. J. Arp, and L. A. Sayavedra-Soto, “Involvement of BmoR and BmoG in n-alkane metabolism in ‘Pseudomonas butanovora,’” *Microbiology*, vol. 154, no. 1, Art. no. 1, Jan. 2008, doi: 10.1099/mic.0.2007/012724-0.

[12] B. Leuthner and J. Heider, “Anaerobic Toluene Catabolism of *Thauera aromatica* : the *bbs* Operon Codes for Enzymes of β Oxidation of the Intermediate Benzylsuccinate,” *J Bacteriol*, vol. 182, no. 2, pp. 272–277, Jan. 2000, doi: 10.1128/JB.182.2.272-277.2000.

[13] M. Li *et al.*, “Facultative anaerobic conversion of lignocellulose biomass to new bioemulsifier by thermophilic Geobacillus thermodenitrificans NG80-2,” *Journal of Hazardous Materials*, vol. 443, p. 130210, Feb. 2023, doi: 10.1016/j.jhazmat.2022.130210.

[14] C. Liang, Y. Huang, and H. Wang, “*pahE* , a Functional Marker Gene for Polycyclic Aromatic Hydrocarbon-Degrading Bacteria,” *Appl Environ Microbiol*, vol. 85, no. 3, Art. no. 3, Feb. 2019, doi: 10.1128/AEM.02399-18.

[15] C. Liang, Q. Ye, Y. Huang, Y. Wang, Z. Zhang, and H. Wang, “Shifts of the new functional marker gene (pahE) of polycyclic aromatic hydrocarbons (PAHs) degrading bacterial population and its relationship with PAHs biodegradation,” *Journal of Hazardous Materials*, vol. 437, p. 129305, Sep. 2022, doi: 10.1016/j.jhazmat.2022.129305.

[16] M. Wang, M. Ding, and Y. Yuan, “Bioengineering for the Microbial Degradation of Petroleum Hydrocarbon Contaminants,” *Bioengineering*, vol. 10, no. 3, Art. no. 3, Mar. 2023, doi: 10.3390/bioengineering10030347.

[17] C. Yin, Y. Xu, T. Li, and N. Zhou, “Wide distribution of the *sad* gene cluster for sub‐terminal oxidation in alkane utilizers,” *Environmental Microbiology*, vol. 24, no. 12, pp. 6307–6319, Dec. 2022, doi: 10.1111/1462-2920.16124.

[18] G. Panasia and B. Philipp, “LaoABCR, a Novel System for Oxidation of Long-Chain Alcohols Derived from SDS and Alkane Degradation in Pseudomonas aeruginosa,” *Appl Environ Microbiol*, vol. 84, no. 13, pp. e00626-18, Jul. 2018, doi: 10.1128/AEM.00626-18.

[19] M. Xu *et al.*, “Responses of Aromatic-Degrading Microbial Communities to Elevated Nitrate in Sediments,” *Environ. Sci. Technol.*, vol. 49, no. 20, Art. no. 20, Oct. 2015, doi: 10.1021/acs.est.5b03442.

[20] M. S. Marcos, M. Lozada, and H. M. Dionisi, “Aromatic hydrocarbon degradation genes from chronically polluted Subantarctic marine sediments,” *Letters in Applied Microbiology*, vol. 49, no. 5, Art. no. 5, Nov. 2009, doi: 10.1111/j.1472-765X.2009.02711.x.

[21] S. Selvakumaran, A. Kapley, S. M. Kashyap, H. F. Daginawala, V. C. Kalia, and H. J. Purohit, “Diversity of aromatic ring-hydroxylating dioxygenase gene in Citrobacter,” *Bioresource Technology*, vol. 102, no. 7, pp. 4600–4609, Apr. 2011, doi: 10.1016/j.biortech.2011.01.011.

[22] S. M. Mbadinga *et al.*, “Analysis of alkane-dependent methanogenic community derived from production water of a high-temperature petroleum reservoir,” *Appl Microbiol Biotechnol*, vol. 96, no. 2, Art. no. 2, Oct. 2012, doi: 10.1007/s00253-011-3828-8.

[23] N. Merino *et al.*, “Single-Cell Genomics of Novel Actinobacteria With the Wood–Ljungdahl Pathway Discovered in a Serpentinizing System,” *Front. Microbiol.*, vol. 11, p. 1031, Jun. 2020, doi: 10.3389/fmicb.2020.01031.

[24] C. L. Murphy *et al.*, “Genomic Analysis of the Yet-Uncultured Binatota Reveals Broad Methylotrophic, Alkane-Degradation, and Pigment Production Capacities,” *mBio*, vol. 12, no. 3, Art. no. 3, Jun. 2021, doi: 10.1128/mBio.00985-21.

[25] K. L. Njoku, E. O. Ude, T. O. Jegede, O. Z. Adeyanju, and P. O. Iheme, “Characterization of hydrocarbon degrading microorganisms from Glycine max and Zea mays phytoremediated crude oil contaminated soil,” *Environ Anal Health Toxicol*, vol. 37, no. 2, Art. no. 2, Apr. 2022, doi: 10.5620/eaht.2022008.

[26] A. U. Okoye, R. Selvarajan, C. B. Chikere, G. C. Okpokwasili, and K. Mearns, “Characterization and identification of long-chain hydrocarbon-degrading bacterial communities in long-term chronically polluted soil in Ogoniland: an integrated approach using culture-dependent and independent methods,” *Environ Sci Pollut Res*, vol. 31, no. 21, Art. no. 21, Apr. 2024, doi: 10.1007/s11356-024-33326-6.

[27] E. Pandolfo, A. Barra Caracciolo, and L. Rolando, “Recent Advances in Bacterial Degradation of Hydrocarbons,” *Water*, vol. 15, no. 2, Art. no. 2, Jan. 2023, doi: 10.3390/w15020375.

[28] S. Nanjani *et al.*, “Transcriptome profiling reveals upregulation of benzoate degradation and related genes in Pseudomonas aeruginosa D6 during textile dye degradation,” *Environmental Research*, vol. 212, p. 113288, Sep. 2022, doi: 10.1016/j.envres.2022.113288.

[29] D. Kim, S. W. Kim, K. Y. Choi, J. S. Lee, and E. Kim, “Molecular cloning and functional characterization of  the genes encoding benzoate and p-hydroxybenzoate degradation by the halophilic Chromohalobacter sp. strain HS-2: Benzoate degradation by a halophilic Chromohalobacter sp.,” *FEMS Microbiology Letters*, vol. 280, no. 2, pp. 235–241, Mar. 2008, doi: 10.1111/j.1574-6968.2008.01067.x.

[30] S. Panke, A. Meyer, C. M. Huber, B. Witholt, and M. G. Wubbolts, “An Alkane-Responsive Expression System for the Production of Fine Chemicals,” *Appl Environ Microbiol*, vol. 65, no. 6, Art. no. 6, Jun. 1999, doi: 10.1128/AEM.65.6.2324-2332.1999.

[31] R. E. Parales, J. L. Ditty, and C. S. Harwood, “Toluene-Degrading Bacteria Are Chemotactic towards the Environmental Pollutants Benzene, Toluene, and Trichloroethylene,” *Appl Environ Microbiol*, vol. 66, no. 9, Art. no. 9, Sep. 2000, doi: 10.1128/AEM.66.9.4098-4104.2000.

[32] C. Park, B. Shin, J. Jung, Y. Lee, and W. Park, “Metabolic and stress responses of *Acinetobacter oleivorans* DR 1 during long‐chain alkane degradation,” *Microbial Biotechnology*, vol. 10, no. 6, pp. 1809–1823, Nov. 2017, doi: 10.1111/1751-7915.12852.

[33] A. Peeb, N. P. Dang, M. Truu, H. Nõlvak, C. Petrich, and J. Truu, “Assessment of Hydrocarbon Degradation Potential in Microbial Communities in Arctic Sea Ice,” *Microorganisms*, vol. 10, no. 2, Art. no. 2, Feb. 2022, doi: 10.3390/microorganisms10020328.

[34] D. Salamanca and K.-H. Engesser, “Isolation and characterization of two novel strains capable of using cyclohexane as carbon source,” *Environ Sci Pollut Res*, vol. 21, no. 22, pp. 12757–12766, Nov. 2014, doi: 10.1007/s11356-014-3206-z.

[35] H. Nõlvak *et al.*, “Microbial Community Dynamics during Biodegradation of Crude Oil and Its Response to Biostimulation in Svalbard Seawater at Low Temperature,” *Microorganisms*, vol. 9, no. 12, p. 2425, Nov. 2021, doi: 10.3390/microorganisms9122425.

[36] R. W. Eaton, “p-Cymene catabolic pathway in Pseudomonas putida F1: cloning and characterization of DNA encoding conversion of p-cymene to p-cumate,” *J Bacteriol*, vol. 179, no. 10, pp. 3171–3180, May 1997, doi: 10.1128/jb.179.10.3171-3180.1997.

[37] Y. Zhou *et al.*, “Driving mechanisms for the adaptation and degradation of petroleum hydrocarbons by native microbiota from seas prone to oil spills,” *Journal of Hazardous Materials*, vol. 476, p. 135060, Sep. 2024, doi: 10.1016/j.jhazmat.2024.135060.

[38] R.-H. Peng *et al.*, “Microbial biodegradation of polyaromatic hydrocarbons,” *FEMS Microbiol Rev*, vol. 32, no. 6, Art. no. 6, Nov. 2008, doi: 10.1111/j.1574-6976.2008.00127.x.

[39] R. Rabus *et al.*, “Anaerobic Microbial Degradation of Hydrocarbons: From Enzymatic Reactions to the Environment,” *Microb Physiol*, vol. 26, no. 1–3, Art. no. 1–3, 2016, doi: 10.1159/000443997.

[40] E. R. Rocha and C. J. Smith, “Role of the Alkyl Hydroperoxide Reductase ( *ahpCF* ) Gene in Oxidative Stress Defense of the Obligate Anaerobe *Bacteroides fragilis*,” *J Bacteriol*, vol. 181, no. 18, pp. 5701–5710, Sep. 1999, doi: 10.1128/JB.181.18.5701-5710.1999.

[41] F. F. Rochman *et al.*, “Benzene and Naphthalene Degrading Bacterial Communities in an Oil Sands Tailings Pond,” *Front. Microbiol.*, vol. 8, p. 1845, Sep. 2017, doi: 10.3389/fmicb.2017.01845.

[42] J. Rojas-Vargas, H. G. Castelán-Sánchez, and L. Pardo-López, “HADEG: A Curated Hydrocarbon Aerobic Degradation Enzymes and Genes Database,” Sep. 01, 2022, *Bioinformatics*. doi: 10.1101/2022.08.30.505856.

[43] J. Rojas-Vargas, H. G. Castelán-Sánchez, and L. Pardo-López, “HADEG: A curated hydrocarbon aerobic degradation enzymes and genes database,” *Computational Biology and Chemistry*, vol. 107, p. 107966, Dec. 2023, doi: 10.1016/j.compbiolchem.2023.107966.

[44] X. Zhang *et al.*, “Biogeochemical coupling of C/Fe in oil-polluted wetlands associated with iron reduction,” *Commun Earth Environ*, vol. 6, no. 1, Art. no. 1, Feb. 2025, doi: 10.1038/s43247-025-02062-1.

[45] J. Rojas-Vargas, E. A. Rebollar, A. Sanchez-Flores, and L. Pardo-López, “A comparative genomic study of a hydrocarbon-degrading marine bacterial consortium,” *PLoS ONE*, vol. 19, no. 8, Art. no. 8, Aug. 2024, doi: 10.1371/journal.pone.0303363.

[46] R. Rost, S. Haas, E. Hammer, H. Herrmann, and G. Burchhardt, “Molecular analysis of aerobic phenylacetate degradation in Azoarcus evansii,” *Mol Gen Genomics*, vol. 267, no. 5, Art. no. 5, Jul. 2002, doi: 10.1007/s00438-002-0699-9.

[47] H. Cao *et al.*, “Insights Into Mechanism of the Naphthalene-Enhanced Biodegradation of Phenanthrene by Pseudomonas sp. SL-6 Based on Omics Analysis,” *Front. Microbiol.*, vol. 12, p. 761216, Nov. 2021, doi: 10.3389/fmicb.2021.761216.

[48] S. S, J. E, N. Reddy S, and S. S, “Crude Oil Bioremediation - Genetically Modified Microorganisms for Poly-Aromatic Hydrocarbon Degradation,” *AEES*, vol. 9, no. 8, Art. no. 8, Aug. 2021, doi: 10.12691/aees-9-8-8.

[49] D. Sanz and E. Díaz, “Genetic characterization of the cyclohexane carboxylate degradation pathway in the denitrifying bacterium *Aromatoleum* sp. CIB,” *Environmental Microbiology*, vol. 24, no. 11, pp. 4987–5004, Nov. 2022, doi: 10.1111/1462-2920.16093.

[50] M. Peters *et al.*, “Acquisition of a deliberately introduced phenol degradation operon, pheBA, by different indigenous Pseudomonas species,” *Appl Environ Microbiol*, vol. 63, no. 12, pp. 4899–4906, Dec. 1997, doi: 10.1128/aem.63.12.4899-4906.1997.

[51] Y. Shinoda *et al.*, “Anaerobic Degradation of Aromatic Compounds by *Magnetospirillum* Strains: Isolation and Degradation Genes,” *Bioscience, Biotechnology, and Biochemistry*, vol. 69, no. 8, pp. 1483–1491, Jan. 2005, doi: 10.1271/bbb.69.1483.

[52] L.-B. Shou *et al.*, “New evidence for a hydroxylation pathway for anaerobic alkane degradation supported by analyses of functional genes and signature metabolites in oil reservoirs,” *AMB Expr*, vol. 11, no. 1, Art. no. 1, Dec. 2021, doi: 10.1186/s13568-020-01174-5.

[53] R. Singh, M. S. Guzman, and A. Bose, “Anaerobic Oxidation of Ethane, Propane, and Butane by Marine Microbes: A Mini Review,” *Front. Microbiol.*, vol. 8, p. 2056, Oct. 2017, doi: 10.3389/fmicb.2017.02056.

[54] H. Arai, T. Ohishi, M. Y. Chang, and T. Kudo, “Arrangement and regulation of the genes for meta-pathway enzymes required for degradation of phenol in Comamonas testosteroni TA441 The DDBJ/EMBL/GenBank accession number for the sequence reported in this paper is AB029044.,” *Microbiology*, vol. 146, no. 7, pp. 1707–1715, Jul. 2000, doi: 10.1099/00221287-146-7-1707.

[55] J. M. Foght and D. W. S. Westlake, “Transposon and spontaneous deletion mutants of plasmid-borne genes encoding polycyclic aromatic hydrocarbon degradation by a strain of Pseudomonas fluorescens,” *Biodegradation*, vol. 7, no. 4, pp. 353–366, Aug. 1996, doi: 10.1007/BF00115749.

[56] M. R. Somee *et al.*, “Genome-resolved analyses show an extensive diversification in key aerobic hydrocarbon-degrading enzymes across bacteria and archaea,” *BMC Genomics*, vol. 23, no. 1, Art. no. 1, Oct. 2022, doi: 10.1186/s12864-022-08906-w.

[57] R. Stephan *et al.*, “Re-examination of the taxonomic status of Enterobacter helveticus, Enterobacter pulveris and Enterobacter turicensis as members of the genus Cronobacter and their reclassification in the genera Franconibacter gen. nov. and Siccibacter gen. nov. as Franconibacter helveticus comb. nov., Franconibacter pulveris comb. nov. and Siccibacter turicensis comb. nov., respectively,” *International Journal of Systematic and Evolutionary Microbiology*, vol. 64, no. Pt_10, Art. no. Pt_10, Oct. 2014, doi: 10.1099/ijs.0.059832-0.

[58] H. Suenaga *et al.*, “Novel organization of aromatic degradation pathway genes in a microbial community as revealed by metagenomic analysis,” *The ISME Journal*, vol. 3, no. 12, Art. no. 12, Dec. 2009, doi: 10.1038/ismej.2009.76.

[59] T. Peng, J. Kan, J. Hu, and Z. Hu, “Genes and novel sRNAs involved in PAHs degradation in marine bacteria Rhodococcus sp. P14 revealed by the genome and transcriptome analysis,” *3 Biotech*, vol. 10, no. 3, Art. no. 3, Mar. 2020, doi: 10.1007/s13205-020-2133-6.

[60] B. Tan, X. Dong, C. W. Sensen, and J. Foght, “Metagenomic analysis of an anaerobic alkane-degrading microbial culture: potential hydrocarbon-activating pathways and inferred roles of community members,” *Genome*, vol. 56, no. 10, Art. no. 10, Oct. 2013, doi: 10.1139/gen-2013-0069.

[61] M. Throne-Holst, A. Wentzel, T. E. Ellingsen, H.-K. Kotlar, and S. B. Zotchev, “Identification of Novel Genes Involved in Long-Chain *n* -Alkane Degradation by *Acinetobacter* sp. Strain DSM 17874,” *Appl Environ Microbiol*, vol. 73, no. 10, Art. no. 10, May 2007, doi: 10.1128/AEM.00064-07.

[62] J. B. Van Beilen and E. G. Funhoff, “Alkane hydroxylases involved in microbial alkane degradation,” *Appl Microbiol Biotechnol*, vol. 74, no. 1, Art. no. 1, Feb. 2007, doi: 10.1007/s00253-006-0748-0.

[63] J. B. Van Beilen *et al.*, “Cytochrome P450 Alkane Hydroxylases of the CYP153 Family Are Common in Alkane-Degrading Eubacteria Lacking Integral Membrane Alkane Hydroxylases,” *Appl Environ Microbiol*, vol. 72, no. 1, Art. no. 1, Jan. 2006, doi: 10.1128/AEM.72.1.59-65.2006.

[64] J. A. Van Leeuwen, J. Gerritse, N. Hartog, S. Ertl, J. R. Parsons, and S. M. Hassanizadeh, “Anaerobic degradation of benzene and other aromatic hydrocarbons in a tar-derived plume: Nitrate versus iron reducing conditions,” *Journal of Contaminant Hydrology*, vol. 248, p. 104006, Jun. 2022, doi: 10.1016/j.jconhyd.2022.104006.

[65] M. Vázquez Rosas Landa *et al.*, “Exploring novel alkane-degradation pathways in uncultured bacteria from the North Atlantic Ocean,” *mSystems*, vol. 8, no. 5, Art. no. 5, Oct. 2023, doi: 10.1128/msystems.00619-23.

[66] A. Vigneron, P. Cruaud, C. Lovejoy, and W. F. Vincent, “Genomic insights into cryptic cycles of microbial hydrocarbon production and degradation in contiguous freshwater and marine microbiomes,” *Microbiome*, vol. 11, no. 1, Art. no. 1, May 2023, doi: 10.1186/s40168-023-01537-7.

[67] H. Villela *et al.*, “Genome analysis of a coral-associated bacterial consortium highlights complementary hydrocarbon degradation ability and other beneficial mechanisms for the host,” *Sci Rep*, vol. 13, no. 1, Art. no. 1, Jul. 2023, doi: 10.1038/s41598-023-38512-z.

[68] W. Wang and Z. Shao, “Enzymes and genes involved in aerobic alkane degradation,” *Front. Microbiol.*, vol. 4, 2013, doi: 10.3389/fmicb.2013.00116.

[69] W. Wang, L. Wang, and Z. Shao, “Polycyclic Aromatic Hydrocarbon (PAH) Degradation Pathways of the Obligate Marine PAH Degrader Cycloclasticus sp. Strain P1,” *Appl Environ Microbiol*, vol. 84, no. 21, Art. no. 21, Nov. 2018, doi: 10.1128/AEM.01261-18.

[70] M. C. Walsh, M. Scholte, J. Valkier, H. P. Smits, and K. Van Dam, “Glucose sensing and signalling properties in Saccharomyces cerevisiae require the presence of at least two members of the glucose transporter family,” *J Bacteriol*, vol. 178, no. 9, Art. no. 9, May 1996, doi: 10.1128/jb.178.9.2593-2597.1996.

[71] G. Wegener, R. Laso-Pérez, V. J. Orphan, and A. Boetius, “Anaerobic Degradation of Alkanes by Marine Archaea,” *Annu. Rev. Microbiol.*, vol. 76, no. 1, Art. no. 1, Sep. 2022, doi: 10.1146/annurev-micro-111021-045911.

[72] F. Widdel, K. Knittel, and A. Galushko, “Anaerobic Hydrocarbon-Degrading Microorganisms: An Overview,” in *Handbook of Hydrocarbon and Lipid Microbiology*, K. N. Timmis, Ed., Berlin, Heidelberg: Springer Berlin Heidelberg, 2010, pp. 1997–2021. doi: 10.1007/978-3-540-77587-4_146.

[73] H. Wu, X. Du, W. Wu, J. Zheng, J. Song, and J. Xie, “Metagenomic analysis reveals specific BTEX degrading microorganisms of a bacterial consortium,” *AMB Expr*, vol. 13, no. 1, Art. no. 1, May 2023, doi: 10.1186/s13568-023-01541-y.

[74] X. Xu *et al.*, “Petroleum Hydrocarbon-Degrading Bacteria for the Remediation of Oil Pollution Under Aerobic Conditions: A Perspective Analysis,” *Front. Microbiol.*, vol. 9, p. 2885, Dec. 2018, doi: 10.3389/fmicb.2018.02885.

[75] M. Xianagang, E. Iyobosa, N. H. Jun, S. Fang, and W. Zhennan, “Biodegradation of petroleum hydrocarbon polluted soil,” *IJMR*, vol. 7, no. 2, Art. no. 2, Jul. 2020, doi: 10.18231/j.ijmr.2020.022.

[76] S. Yan and G. Wu, “Reorganization of gene network for degradation of polycyclic aromatic hydrocarbons (PAHs) in Pseudomonas aeruginosa PAO1 under several conditions,” *J Appl Genetics*, vol. 58, no. 4, Art. no. 4, Nov. 2017, doi: 10.1007/s13353-017-0402-9.

[77] C.-F. Yin, Y. Nie, T. Li, and N.-Y. Zhou, “AlmA involved in the long-chain *n* -alkane degradation pathway in *Acinetobacter baylyi* ADP1 is a Baeyer–Villiger monooxygenase,” *Appl Environ Microbiol*, vol. 90, no. 1, pp. e01625-23, Jan. 2024, doi: 10.1128/aem.01625-23.

[78] Q. Zhao, M. Bilal, S. Yue, H. Hu, W. Wang, and X. Zhang, “Identification of biphenyl 2, 3-dioxygenase and its catabolic role for phenazine degradation in Sphingobium yanoikuyae B1,” *Journal of Environmental Management*, vol. 204, pp. 494–501, Dec. 2017, doi: 10.1016/j.jenvman.2017.09.027.

[79] A. Vigneron *et al.*, “Contrasting Pathways for Anaerobic Methane Oxidation in Gulf of Mexico Cold Seep Sediments,” *mSystems*, vol. 4, no. 1, Art. no. 1, Feb. 2019, doi: 10.1128/msystems.00091-18.
