# Supplementary material for: Whole Genome of Petroleum Hydrocarbon Degrading Rhodococcus indonesiensis isolated from Nacharam, Hyderabad, India
Source: Research Square preprint supplement (doi:10.21203/rs.3.rs-6309542/v1), 2025-09-26
Supplement: Supplementary file 13 [file b6a00c89decb497df57ec647.docx]

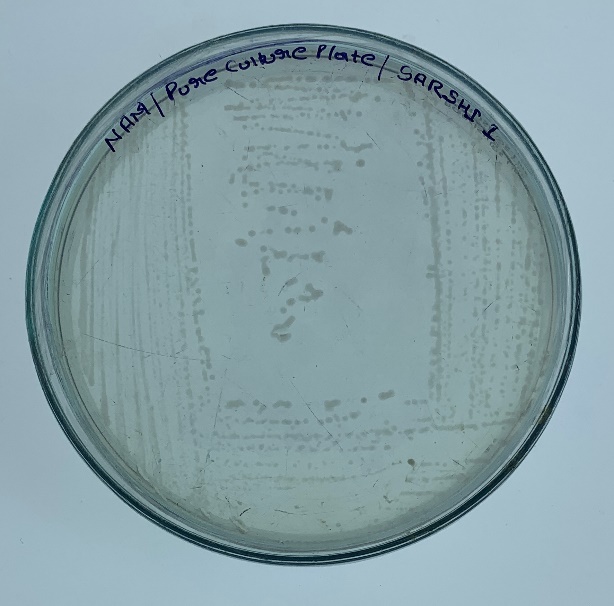

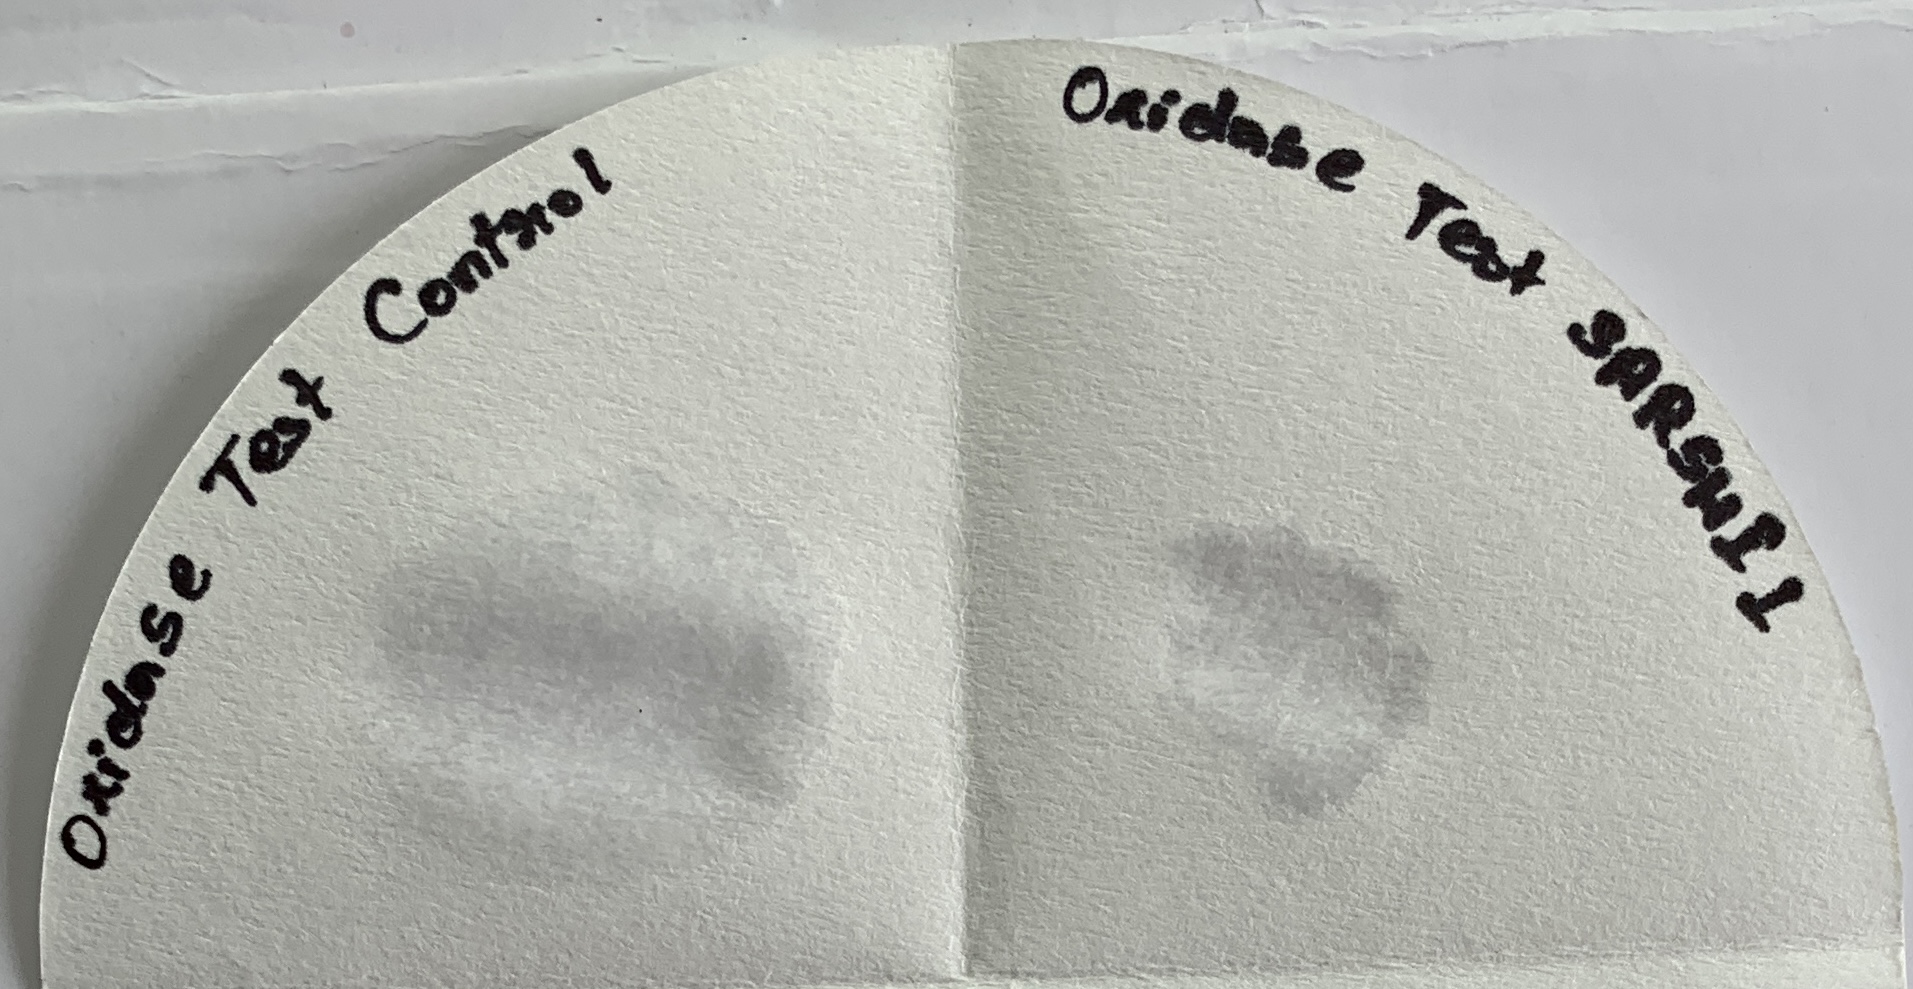


**A**

**B**


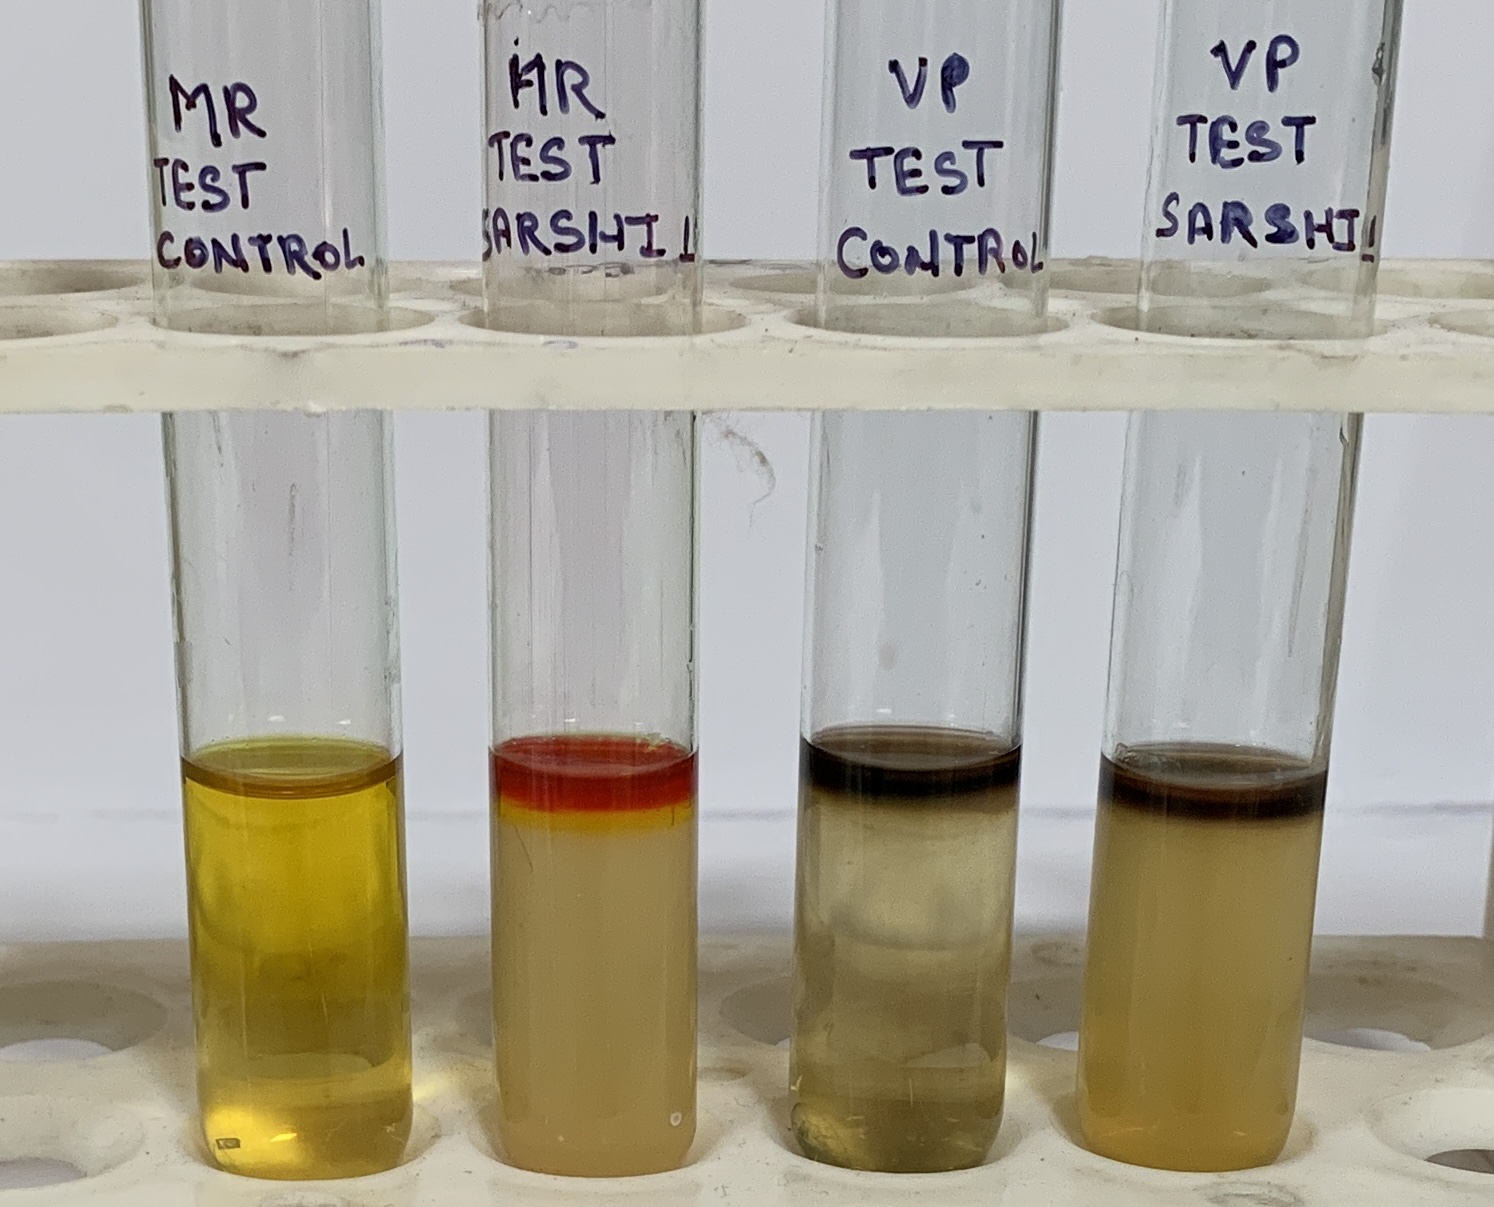

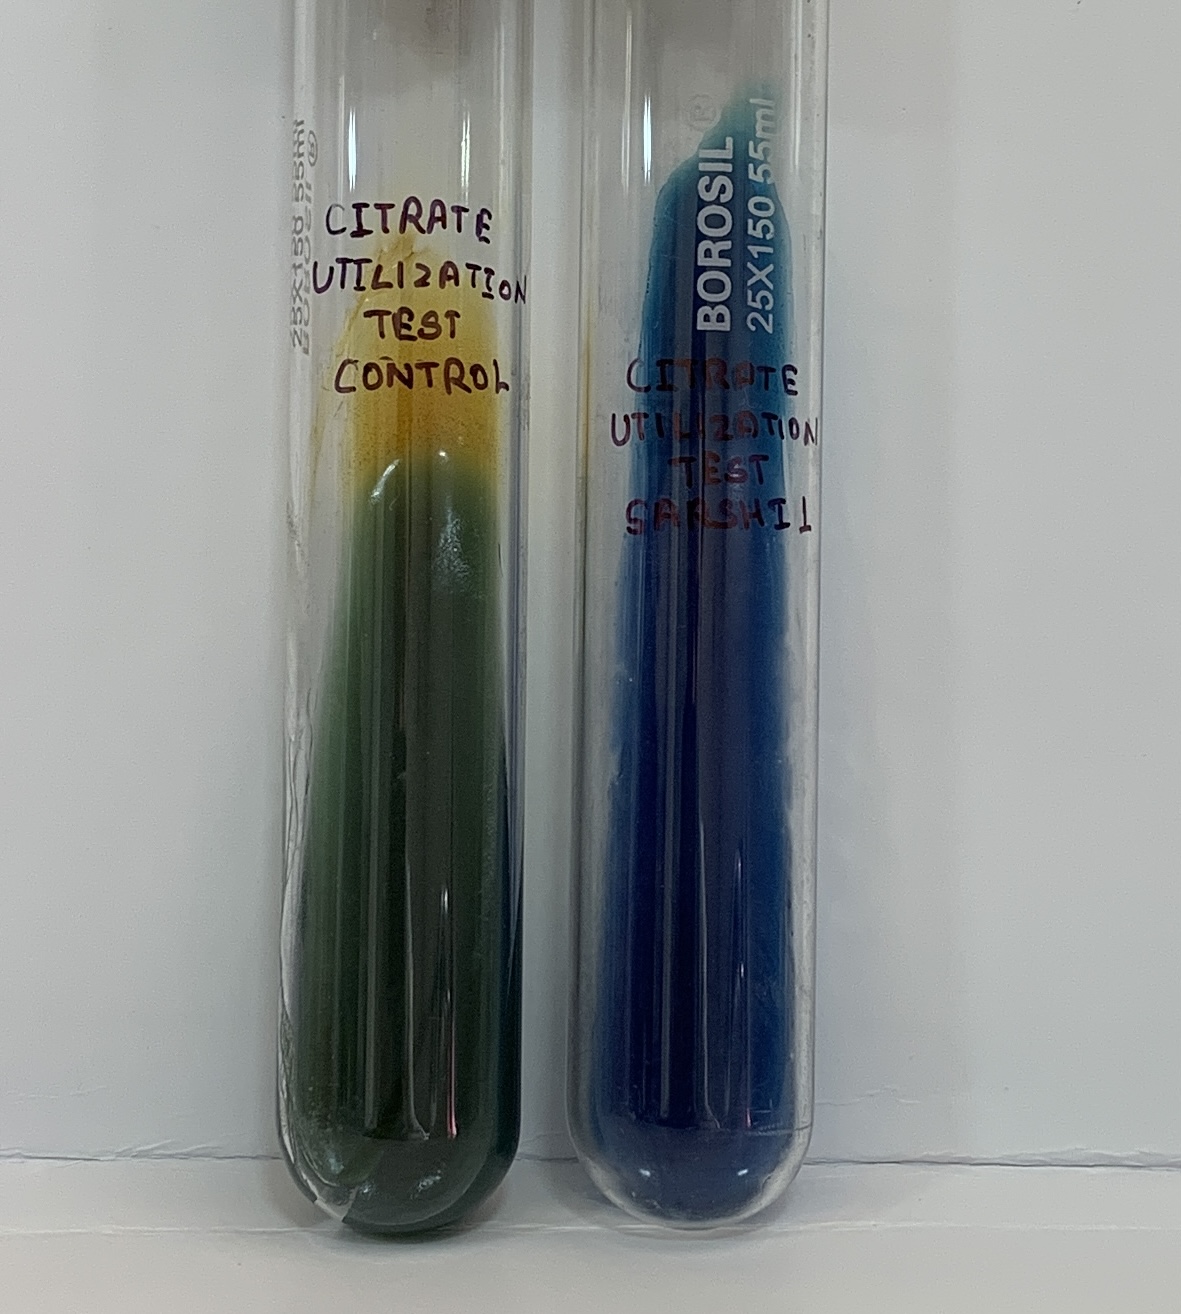


**C**

**D**

**Fig. 1 Biochemical and Microbial Characterization of SARSHI1**


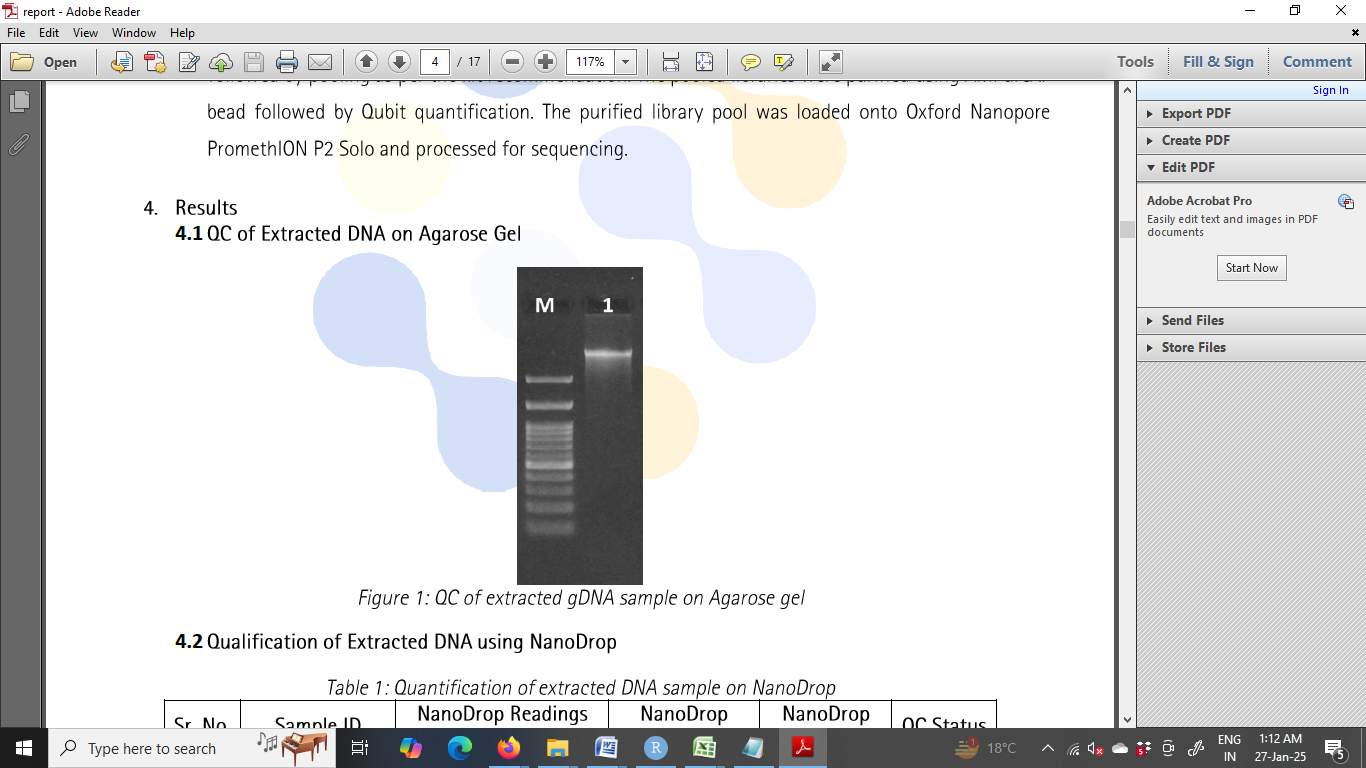


**Fig. 2 DNA QC: Agarose Gel Electrophoresis**


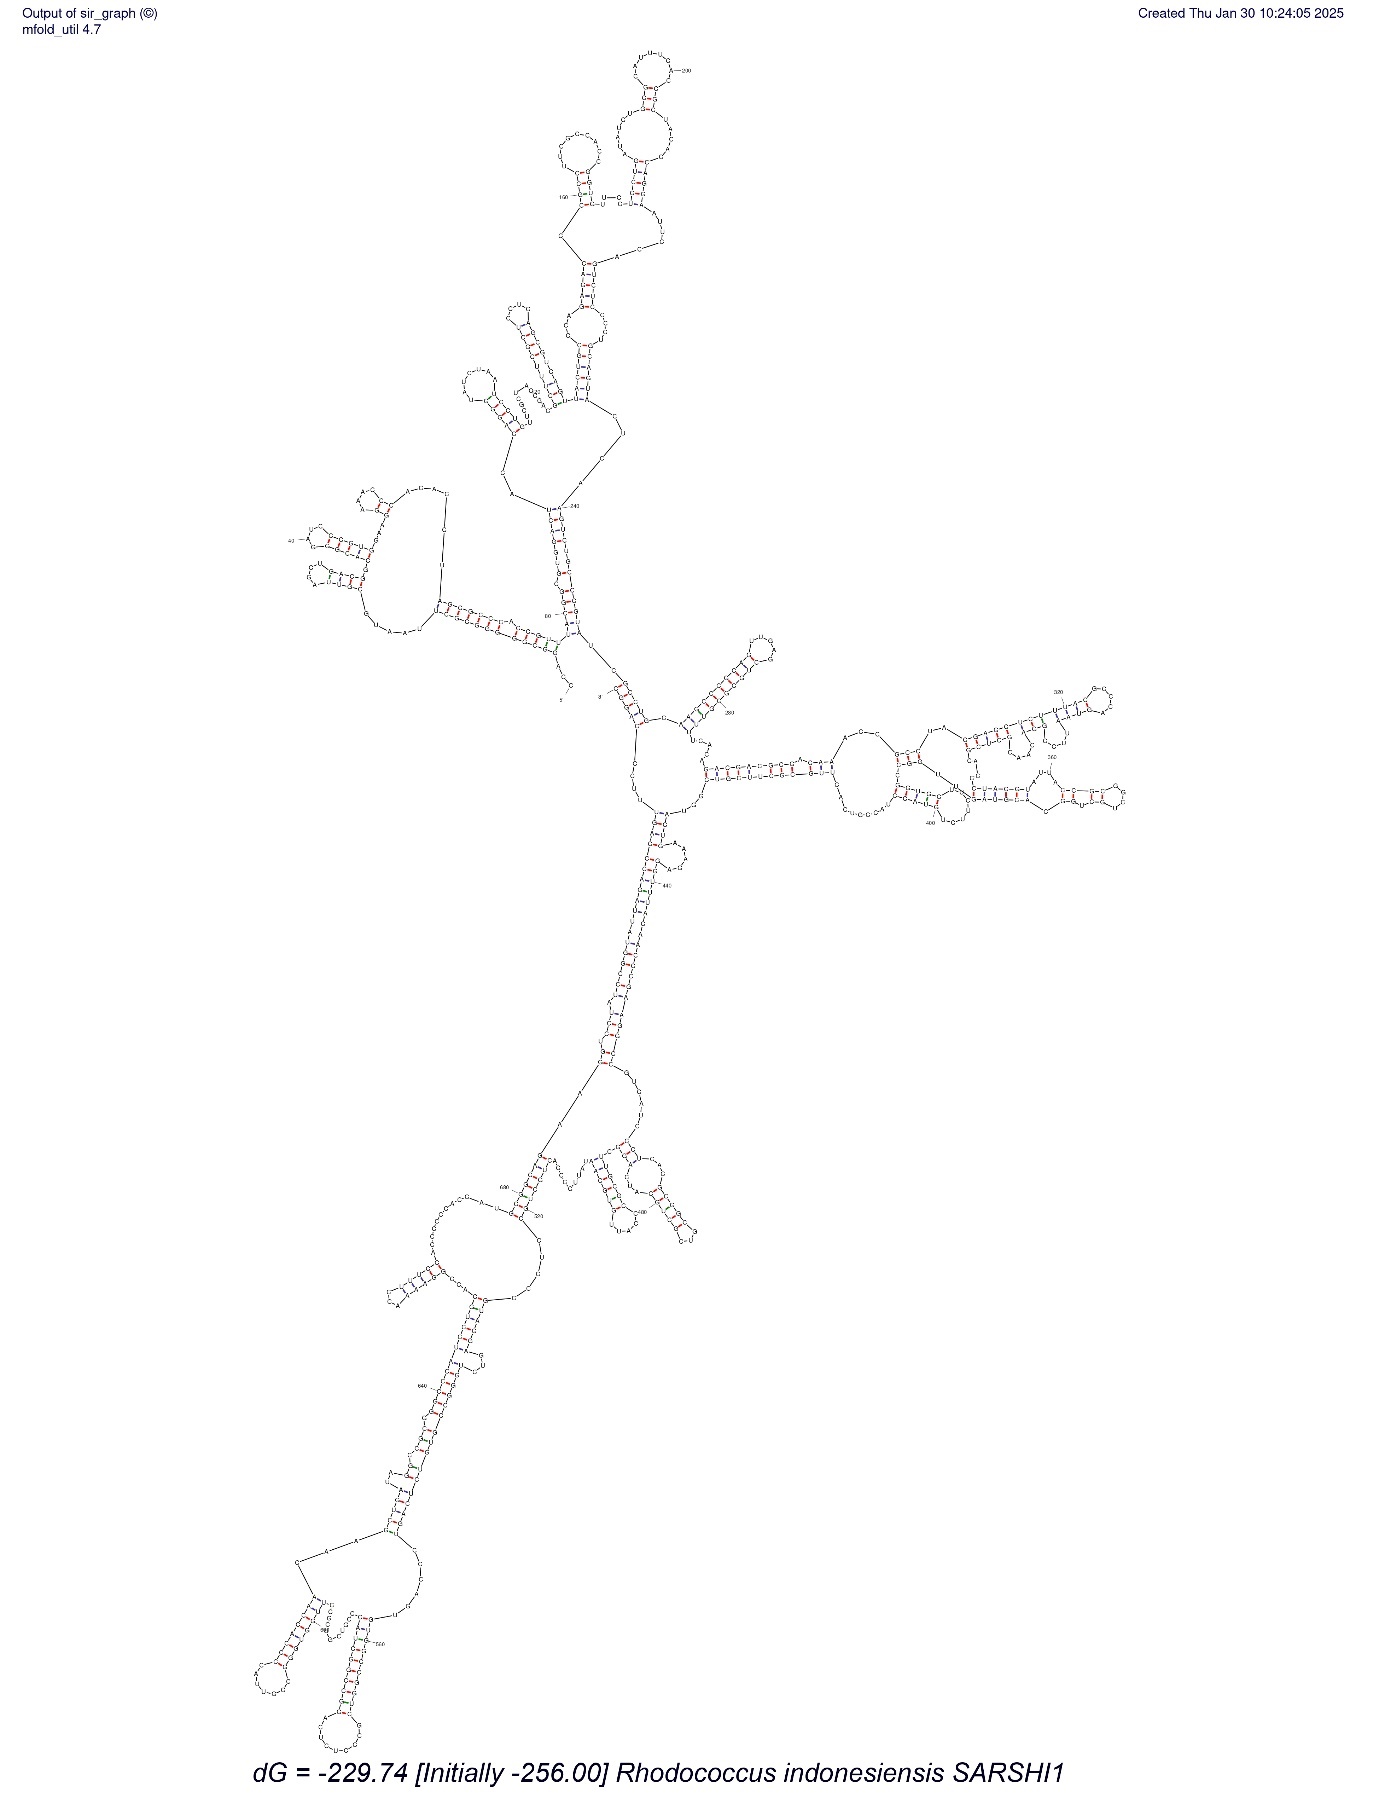


**Fig. 3 rRNA Structure of** ***Rhodococcus indonesiensis* SARSHI1**

**Table:1 Maximum Likelihood Scores**

|  | Rate of Substitution | **A** | **T/U** | **C** | **G** | Nucleotide Frequencies |
| --- | --- | --- | --- | --- | --- | --- |
| Maximum likelihood estimate of substitution matrix. | **A** | **-** | 5.44 | 7.38 | 11.78 | A = 21.74%, T/U = 18.35%, C = 24.89%, and G = 35.02% |
| **T** | 6.45 | **-** | 12.43 | 10.39 |
| **C** | 6.45 | 9.17 | **-** | 10.39 |
| **G** | 7.31 | 5.44 | 7.38 | **-** |
| Maximum Composite likelihood estimate of the pattern of nucleotide substitution | **A** | **-** | 1.34 | 1.83 | 30.96 | A=22.38%, T/U=18.15%, C=24.80%, and G=34.66%. |
| **T** | 1.65 | **-** | 19.78 | 2.56 |
| **C** | 1.65 | 14.38 | **-** | 2.56 |
| **G** | 20 | 1.34 | 1.83 | **-** |
|  |  |  |  |  |  |  |
| Tajima’s neutrality test | ***m*** | ***s*** | ***Ps*** | ***Θ*** | ***π*** | ***D*** |
|  | 20 | ## | 0.9229390 | 0.260148476859608 | 0.416525183927561 | 2.51268132715715 |
| m = number of sequences, n = total number of sites, S = Number of segregating sites, ps = S/n, Θ = ps/a1, π = nucleotide diversity, D - Tajima test statistic. | | | | | | |

**Table 2: Thermodynamic Properties of SARSHI1**

| Structural element | δG | Information |
| --- | --- | --- |
| **External loop** | -0.20 | 5 ss bases & 3 closing helices. |
| **Stack** | -3.40 | External closing pair is G254-C720 |
| **Helix** | -10.90 | 5 base pairs. |
| **Multi-loop** | 3.00 | External closing pair is G258-C716 13 ss bases & 4 closing helices. |
| **Helix** | -6.40 | 4 base pairs. |
| **Bulge loop** | 4.00 | External closing pair is G432-C708 |
| **Stack** | -3.30 | External closing pair is G438-C707 |
| **Helix** | -8.70 | 6 base pairs. |
| **Interior loop** | 3.10 | External closing pair is A443-U702 |
| **Stack** | -2.20 | External closing pair is A446-U699 |
| **Helix** | -3.30 | 2 base pairs. |
| **Multi-loop** | 0.70 | External closing pair is C456-G687 18 ss bases & 4 closing helices. |
| **Stack** | -2.10 | External closing pair is C515-G684 |
| **Helix** | -7.50 | 5 base pairs. |
| **Hairpin loop** | 6.20 | Closing pair is A657-U661 |
| **Stack** | -2.50 | External closing pair is G527-C649 |
| **Helix** | -1.50 | 2 base pairs. |
| **Bulge loop** | 3.30 | External closing pair is C546-G631 |
| **Stack** | -2.40 | External closing pair is U547-A628 |
