# Supplementary material for: Whole Genome of Petroleum Hydrocarbon Degrading Rhodococcus indonesiensis isolated from Nacharam, Hyderabad, India
Source: Research Square preprint supplement (doi:10.21203/rs.3.rs-6309542/v1), 2025-09-26
Supplement: Supplementary file 14 [file ba5135efa4fbd633eb403f2b.xlsx]

## Sheet: Sheet1
#target name	accession	query name	accession	full sequence E-value	full sequence score	full sequence bias	best 1 domain E-value	best 1 domain score	best 1 domain bias	domain number estimation exp	domain number estimation reg	domain number estimation clu	domain number estimation ov	domain number estimation env	domain number estimation dom	domain number estimation rep	domain number estimation inc	description of target
ENBDON_02163	-	AhyA	-	6.9e-94	313.8	10.8	4.6e-33	112.5	0	5.1	5	0	0	5	5	5	5	nitrate reductase subunit alpha
ENBDON_00794	-	AhyA	-	3.6e-25	86.3	0	3.7e-07	26.7	0	4.2	4	0	0	4	4	4	4	Oxidoreductase
ENBDON_05091	-	AhyA	-	2.2e-24	83.7	0.1	1e-09	35.2	0	4.2	3	1	1	4	4	4	4	Putative nitrate/sulfite reductase
ENBDON_00787	-	AhyA	-	4e-22	76.3	0	1.9e-09	34.4	0	3.1	3	0	0	3	3	3	3	4Fe-4S Mo/W bis-MGD-type domain-containing protein
ENBDON_00788	-	AhyA	-	2.4e-17	60.5	0	4e-05	20	0	4	3	1	1	4	4	4	4	Formate dehydrogenase-O, major subunit
ENBDON_00140	-	AhyA	-	9.6e-15	51.9	0.5	1.2e-10	38.3	0.1	3	2	1	0	2	2	2	2	Formate dehydrogenase-N subunit alpha
ENBDON_02282	-	AhyA	-	4.4e-14	49.7	1.5	8.9e-05	18.9	0	5.1	4	1	0	4	4	4	4	Dimethyl sulfoxide/trimethylamine N-oxide reductase
ENBDON_04458	-	AhyA	-	2.4e-13	47.2	0	4.9e-07	26.3	0	4	3	1	1	4	4	4	4	Molybdopterin oxidoreductase
ENBDON_04319	-	AlkB	-	6.6e-219	725.9	2.5	8e-219	725.6	2.5	1	1	0	0	1	1	1	1	Alkane 1-monooxygenase
ENBDON_03995	-	AlkB	-	2.1e-190	631.9	7.6	2.5e-190	631.6	7.6	1	1	0	0	1	1	1	1	Alkane 1-monooxygenase 1
ENBDON_04320	-	AlkB	-	2.5e-11	41.3	0	2.5e-11	41.2	0	1	1	0	0	1	1	1	1	Rubredoxin
ENBDON_04321	-	AlkB	-	2.8e-06	24.6	0	2.8e-06	24.6	0	1	1	0	0	1	1	1	1	Rubredoxin
ENBDON_01862	-	AlkB	-	0.00011	19.3	0	0.00012	19.2	0	1.1	1	0	0	1	1	1	1	F0F1 ATP synthase subunit B
ENBDON_01146	-	AlkB	-	0.002	15.2	0.2	0.0025	14.9	0.2	1	1	0	0	1	1	1	1	Integral membrane protein
ENBDON_03286	-	AlkB	-	0.0027	14.8	0	0.0041	14.2	0	1.3	1	0	0	1	1	1	1	TetR family transcriptional regulator
ENBDON_00284	-	AlkB	-	0.72	6.8	5.5	1.4	5.8	1.5	2.1	2	0	0	2	2	2	0	decaprenyl-phosphate phosphoribosyltransferase
ENBDON_04476	-	AlmA_GroupI	-	3.9e-205	680.3	0	4.6e-205	680.1	0	1	1	0	0	1	1	1	1	FAD-containing monooxygenase EthA
ENBDON_00642	-	AlmA_GroupI	-	5.2e-172	571	0	6.1e-172	570.8	0	1	1	0	0	1	1	1	1	FAD-containing monooxygenase EthA
ENBDON_00510	-	AlmA_GroupI	-	2e-48	163.4	0	2.6e-48	163	0	1	1	0	0	1	1	1	1	Fad-dependent monooxygenase
ENBDON_01596	-	AlmA_GroupI	-	2.1e-48	163.3	0	2.7e-48	163	0	1.1	1	0	0	1	1	1	1	Cyclohexanone monooxygenase
ENBDON_00153	-	AlmA_GroupI	-	3.8e-47	159.2	0	4.7e-47	158.8	0	1	1	0	0	1	1	1	1	Cyclohexanone monooxygenase
ENBDON_04701	-	AlmA_GroupI	-	5.6e-35	119	0	2.5e-32	110.3	0.1	2.1	2	0	0	2	2	2	2	Phenylacetone monooxygenase
ENBDON_04718	-	AlmA_GroupI	-	1.6e-30	104.3	0	1.3e-26	91.4	0	2.1	2	0	0	2	2	2	2	Cyclohexanone monooxygenase
ENBDON_04683	-	AlmA_GroupI	-	6.6e-30	102.3	0	3.8e-27	93.2	0	2.1	2	0	0	2	2	2	2	4-hydroxyacetophenone monooxygenase
ENBDON_04715	-	AlmA_GroupI	-	5.4e-19	66.3	0.1	6.5e-17	59.4	0	2.6	2	1	0	2	2	2	1	Monooxygenase
ENBDON_02361	-	AlmA_GroupI	-	6e-16	56.2	0.2	2.7e-12	44.2	0	2.1	2	0	0	2	2	2	2	Flavin-containing monooxygenase
ENBDON_01153	-	AlmA_GroupI	-	1.5e-12	45.1	0	3.6e-06	24	0	3	3	0	0	3	3	3	3	FAD-dependent pyridine nucleotide-disulfide oxidoreductase
ENBDON_00095	-	AlmA_GroupI	-	4.5e-09	33.6	0	4.4e-07	27	0	2.2	2	0	0	2	2	2	1	NAD(P)-binding domain-containing protein
ENBDON_04531	-	AlmA_GroupI	-	6.4e-08	29.8	0	4.1e-06	23.8	0.1	2.7	2	1	0	2	2	2	1	ArsO family NAD(P)H-dependent flavin-containing monooxygenase
ENBDON_04168	-	AlmA_GroupI	-	0.0013	15.6	0.1	0.0017	15.1	0.1	1.1	1	0	0	1	1	1	1	FAD-dependent oxidoreductase
ENBDON_01305	-	AlmA_GroupI	-	0.005	13.6	0.3	1.5	5.4	0	2.6	2	1	1	3	3	3	2	Dehydrogenase
ENBDON_02129	-	AlmA_GroupI	-	0.02	11.6	0	0.079	9.7	0	1.8	2	0	0	2	2	2	0	malate dehydrogenase (quinone)
ENBDON_00634	-	AlmA_GroupI	-	0.027	11.2	0.1	0.056	10.2	0	1.4	1	1	0	1	1	1	0	FAD-binding oxidoreductase
ENBDON_01476	-	AlmA_GroupI	-	0.041	10.6	0	0.071	9.8	0	1.3	1	0	0	1	1	1	0	Portal protein
ENBDON_00050	-	AlmA_GroupI	-	0.091	9.5	0.9	1.7	5.2	0.1	2.3	3	0	0	3	3	3	0	Dihydropyrimidine dehydrogenase subunit A
ENBDON_04476	-	AlmA_GroupIII	-	6.1e-172	570.9	0	7.8e-172	570.5	0	1	1	0	0	1	1	1	1	FAD-containing monooxygenase EthA
ENBDON_00642	-	AlmA_GroupIII	-	1.5e-151	503.6	0	1.7e-151	503.4	0	1	1	0	0	1	1	1	1	FAD-containing monooxygenase EthA
ENBDON_00510	-	AlmA_GroupIII	-	5.2e-40	135.7	0	6.5e-40	135.4	0	1	1	0	0	1	1	1	1	Fad-dependent monooxygenase
ENBDON_01596	-	AlmA_GroupIII	-	7.2e-35	118.7	0	9.1e-35	118.4	0	1.1	1	0	0	1	1	1	1	Cyclohexanone monooxygenase
ENBDON_00153	-	AlmA_GroupIII	-	8.5e-33	111.9	0	1e-32	111.6	0	1	1	0	0	1	1	1	1	Cyclohexanone monooxygenase
ENBDON_04701	-	AlmA_GroupIII	-	3.7e-29	99.9	0	3.3e-26	90.1	0	2.1	2	0	0	2	2	2	2	Phenylacetone monooxygenase
ENBDON_04718	-	AlmA_GroupIII	-	9.9e-28	95.2	0	1.4e-25	88.1	0	2.1	2	0	0	2	2	2	2	Cyclohexanone monooxygenase
ENBDON_04683	-	AlmA_GroupIII	-	2.6e-24	83.9	0	1.6e-22	78	0	2.1	2	0	0	2	2	2	1	4-hydroxyacetophenone monooxygenase
ENBDON_04715	-	AlmA_GroupIII	-	1.1e-17	62	0	2.3e-15	54.4	0	2.3	2	1	0	2	2	2	2	Monooxygenase
ENBDON_02361	-	AlmA_GroupIII	-	2e-13	47.9	0.4	7.8e-10	36.1	0	2.3	3	0	0	3	3	3	2	Flavin-containing monooxygenase
ENBDON_00095	-	AlmA_GroupIII	-	2.9e-09	34.3	0	2.5e-08	31.1	0	2	2	0	0	2	2	2	1	NAD(P)-binding domain-containing protein
ENBDON_01153	-	AlmA_GroupIII	-	3.8e-09	33.9	0	0.00094	16.1	0	3	3	0	0	3	3	3	2	FAD-dependent pyridine nucleotide-disulfide oxidoreductase
ENBDON_04531	-	AlmA_GroupIII	-	4.7e-06	23.7	0	4.2e-05	20.5	0	2.2	2	1	0	2	2	2	1	ArsO family NAD(P)H-dependent flavin-containing monooxygenase
ENBDON_01476	-	AlmA_GroupIII	-	0.049	10.4	0	0.072	9.9	0	1.2	1	0	0	1	1	1	0	Portal protein
ENBDON_02163	-	CmdA	-	2.2e-74	249.1	5.6	5e-22	75.8	0.6	5.1	5	0	0	5	5	5	5	nitrate reductase subunit alpha
ENBDON_05091	-	CmdA	-	2.4e-17	60.3	0	2.7e-08	30.3	0	4.1	3	1	1	4	4	4	4	Putative nitrate/sulfite reductase
ENBDON_00794	-	CmdA	-	8.9e-16	55.1	0.1	5.8e-07	25.9	0	3.9	3	1	1	4	4	4	3	Oxidoreductase
ENBDON_00788	-	CmdA	-	1.2e-08	31.5	0	0.044	9.8	0	4.1	4	0	0	4	4	4	4	Formate dehydrogenase-O, major subunit
ENBDON_00787	-	CmdA	-	1.5e-08	31.1	0	0.00025	17.2	0	2.9	3	0	0	3	3	3	2	4Fe-4S Mo/W bis-MGD-type domain-containing protein
ENBDON_00140	-	CmdA	-	3e-08	30.1	0	2.2e-07	27.3	0	2.1	2	1	0	2	2	2	1	Formate dehydrogenase-N subunit alpha
ENBDON_02282	-	CmdA	-	4.8e-07	26.2	0	0.0029	13.6	0	3	3	0	0	3	3	3	2	Dimethyl sulfoxide/trimethylamine N-oxide reductase
ENBDON_04458	-	CmdA	-	1.2e-06	24.8	0	0.0012	14.9	0	2.9	3	0	0	3	3	3	2	Molybdopterin oxidoreductase
ENBDON_01035	-	CYP153	-	4.3e-93	310.5	0	4.8e-93	310.3	0	1	1	0	0	1	1	1	1	Cytochrome P450
ENBDON_00933	-	CYP153	-	2.9e-88	294.6	0	3.5e-88	294.3	0	1	1	0	0	1	1	1	1	Cytochrome P450
ENBDON_00118	-	CYP153	-	2.7e-84	281.5	0	3.3e-84	281.2	0	1	1	0	0	1	1	1	1	Cytochrome P450
ENBDON_00741	-	CYP153	-	2.8e-83	278.2	0	3.4e-83	277.9	0	1	1	0	0	1	1	1	1	Cytochrome P450
ENBDON_00820	-	CYP153	-	3e-75	251.7	0	3.4e-75	251.6	0	1	1	0	0	1	1	1	1	Cytochrome P450
ENBDON_00754	-	CYP153	-	6.2e-74	247.4	0	8.2e-74	247	0	1	1	0	0	1	1	1	1	Cytochrome P450
ENBDON_00804	-	CYP153	-	2.6e-72	242.1	0	3.1e-72	241.8	0	1	1	0	0	1	1	1	1	Cytochrome P450
ENBDON_00821	-	CYP153	-	5.4e-71	237.7	0	5.9e-71	237.6	0	1	1	0	0	1	1	1	1	Cytochrome P450
ENBDON_01037	-	CYP153	-	2.3e-69	232.4	0	2.8e-69	232.1	0	1	1	0	0	1	1	1	1	Cytochrome P450
ENBDON_00258	-	CYP153	-	3.2e-56	189	0	4.8e-56	188.5	0	1.1	1	0	0	1	1	1	1	Cytochrome P450
ENBDON_04707	-	CYP153	-	3.5e-54	182.3	0	1.2e-53	180.6	0	1.6	1	1	0	1	1	1	1	Cytochrome P450
ENBDON_04732	-	CYP153	-	2.1e-51	173.2	0	5.1e-51	171.9	0	1.5	1	1	0	1	1	1	1	Cytochrome P450
ENBDON_04737	-	CYP153	-	5.4e-51	171.8	0	7e-51	171.4	0	1	1	0	0	1	1	1	1	Cytochrome P450
ENBDON_02798	-	CYP153	-	6.5e-49	165	0	2.7e-48	162.9	0	1.7	1	1	0	1	1	1	1	Cytochrome P450
ENBDON_04731	-	CYP153	-	5.5e-37	125.7	0	1.3e-36	124.5	0	1.5	1	1	0	1	1	1	1	Cytochrome P450
ENBDON_01500	-	CYP153	-	1.1e-32	111.5	0	1.7e-32	110.9	0	1.2	1	0	0	1	1	1	1	Biotin biosynthesis cytochrome P450
ENBDON_04672	-	CYP153	-	7.6e-28	95.6	0	1.2e-27	94.9	0	1.2	1	0	0	1	1	1	1	Cytochrome P450
ENBDON_01039	-	CYP153	-	1e-13	49	0	1.4e-12	45.3	0	2	1	1	0	1	1	1	1	Lanosterol 14-alpha demethylase
ENBDON_04305	-	CYP153	-	9.2e-11	39.3	0	1.2e-07	29	0	2.8	2	1	0	2	2	2	2	Putative cytochrome P450 136
ENBDON_04514	-	CYP153	-	1.1e-10	39	0	4.3e-09	33.8	0	2.6	2	1	0	2	2	2	1	Cytochrome P450 monooxygenase
ENBDON_00640	-	CYP153	-	5.9e-10	36.6	0	4.6e-09	33.7	0	2.2	1	1	0	1	1	1	1	Putative cytochrome P450 135A1
ENBDON_05114	-	CYP153	-	1.1e-09	35.8	0	1.4e-05	22.2	0	2.2	2	0	0	2	2	2	2	Putative cytochrome P450
ENBDON_00730	-	CYP153	-	9.1e-09	32.7	0	0.00011	19.3	0	2.2	2	0	0	2	2	2	2	Cytochrome P450
ENBDON_04089	-	CYP153	-	5.4e-08	30.2	0	6.9e-07	26.5	0	2.4	2	1	0	2	2	2	1	Cytochrome P450
ENBDON_04924	-	DszC	-	3.3e-47	159.2	5.5	5e-47	158.6	5.5	1.1	1	0	0	1	1	1	1	SfnB family sulfur acquisition oxidoreductase
ENBDON_04925	-	DszC	-	1.4e-37	127.5	5.2	2e-37	127	5.2	1.2	1	0	0	1	1	1	1	Dibenzothiophene monooxygenase
ENBDON_03717	-	DszC	-	5.7e-22	76.1	0.5	2.8e-21	73.8	0.5	1.8	1	1	0	1	1	1	1	Dibenzothiophene monooxygenase
ENBDON_00603	-	DszC	-	1.2e-20	71.7	4.3	2.2e-20	70.9	4.3	1.3	1	1	0	1	1	1	1	Acyl-CoA dehydrogenase
ENBDON_04500	-	DszC	-	4.6e-16	56.6	0.7	2.1e-14	51.1	0.7	2.1	1	1	0	1	1	1	1	Acyl-CoA dehydrogenase related to the alkylation response protein AidB
ENBDON_04400	-	DszC	-	1.8e-15	54.7	0	5.1e-15	53.2	0	1.7	1	1	0	1	1	1	1	Acyl-CoA dehydrogenase
ENBDON_04832	-	DszC	-	7.5e-15	52.6	0.1	1.1e-11	42.3	0	2	1	1	1	2	2	2	2	Long-chain specific acyl-CoA dehydrogenase, mitochondrial
ENBDON_05027	-	DszC	-	4.5e-14	50	0	5.7e-14	49.7	0	1.3	1	0	0	1	1	1	1	Acryloyl-CoA reductase (NADH)
ENBDON_04751	-	DszC	-	5.6e-14	49.8	0	2.5e-13	47.6	0	1.8	2	0	0	2	2	2	1	Acyl-CoA/acyl-ACP dehydrogenase
ENBDON_04240	-	DszC	-	2.1e-13	47.9	2.7	1.6e-12	45	2.7	1.9	1	1	0	1	1	1	1	Hydroxylase
ENBDON_03457	-	DszC	-	2.7e-13	47.5	0.5	3.7e-11	40.5	0.5	2	1	1	0	1	1	1	1	Acyl-CoA dehydrogenase
ENBDON_01827	-	DszC	-	3.6e-13	47.1	0.3	1.2e-09	35.4	0	2	1	1	1	2	2	2	2	Acyl-CoA dehydrogenase
ENBDON_04389	-	DszC	-	9e-13	45.8	0	2.3e-12	44.5	0	1.6	1	1	0	1	1	1	1	Acyl-CoA dehydrogenase
ENBDON_01175	-	DszC	-	1.4e-12	45.1	0	1.4e-11	41.8	0	2	1	1	0	1	1	1	1	Acyl-CoA dehydrogenase related to the alkylation response protein AidB
ENBDON_00028	-	DszC	-	1.5e-12	45	0	8.7e-12	42.5	0	1.9	1	1	0	1	1	1	1	putative acyl-CoA dehydrogenase FadE10
ENBDON_04831	-	DszC	-	2.3e-12	44.4	0.1	5.7e-12	43.1	0.1	1.7	1	1	0	1	1	1	1	Acyl-CoA dehydrogenase
ENBDON_00711	-	DszC	-	2.6e-12	44.2	4.9	6.2e-12	43	4.8	1.5	1	1	0	1	1	1	1	Flavin-dependent monooxygenase
ENBDON_03511	-	DszC	-	4e-12	43.7	0.3	1e-11	42.3	0.3	1.7	1	1	0	1	1	1	1	Acyl-CoA dehydrogenase
ENBDON_04825	-	DszC	-	2.2e-11	41.2	3.2	3e-11	40.8	3.2	1.3	1	0	0	1	1	1	1	Acyl-CoA dehydrogenase
ENBDON_00629	-	DszC	-	2.5e-11	41	0	3.2e-11	40.7	0	1.1	1	0	0	1	1	1	1	Acyl-CoA dehydrogenase
ENBDON_03585	-	DszC	-	4e-11	40.3	0.1	5.2e-11	40	0.1	1.1	1	0	0	1	1	1	1	Acyl-CoA dehydrogenase
ENBDON_04141	-	DszC	-	6.4e-11	39.7	0.1	1.1e-10	38.9	0	1.4	2	0	0	2	2	2	1	Acyl-CoA dehydrogenase
ENBDON_00508	-	DszC	-	1.4e-10	38.6	0	2.1e-10	37.9	0	1.2	1	0	0	1	1	1	1	Acyl-CoA dehydrogenase
ENBDON_03966	-	DszC	-	1.9e-10	38.1	2.9	2.2e-07	28	1.1	2.4	2	1	0	2	2	2	2	Pigment production hydroxylase
ENBDON_04397	-	DszC	-	6.6e-10	36.3	0	1e-09	35.7	0	1.2	1	0	0	1	1	1	1	Butyryl-CoA dehydrogenase
ENBDON_04200	-	DszC	-	1.1e-09	35.6	0.2	4.2e-09	33.7	0.2	1.7	1	1	0	1	1	1	1	Flavin-dependent monooxygenase
ENBDON_02222	-	DszC	-	2e-09	34.7	0	2.9e-09	34.2	0	1.1	1	0	0	1	1	1	1	Acyl-CoA dehydrogenase, short-chain specific
ENBDON_05156	-	DszC	-	3.8e-09	33.8	0.2	1.2e-08	32.2	0.2	1.8	1	1	0	1	1	1	1	Acyl-CoA dehydrogenase
ENBDON_04796	-	DszC	-	5.9e-09	33.2	0.5	1.2e-07	28.8	0.5	2.1	1	1	0	1	1	1	1	Acyl-CoA dehydrogenase related to the alkylation response protein AidB
ENBDON_01168	-	DszC	-	2.5e-08	31.2	0.1	6.3e-08	29.8	0	1.6	2	0	0	2	2	2	1	Acyl-CoA dehydrogenase
ENBDON_05155	-	DszC	-	5e-08	30.1	0.1	7e-08	29.7	0.1	1.3	1	0	0	1	1	1	1	Alkylation response protein AidB-like acyl-CoA dehydrogenase
ENBDON_04548	-	DszC	-	5.3e-08	30.1	0.4	8.2e-08	29.4	0.4	1.2	1	0	0	1	1	1	1	Acyl-CoA dehydrogenase
ENBDON_04372	-	DszC	-	7.5e-08	29.6	0	1.7e-07	28.4	0	1.5	2	0	0	2	2	2	1	Butyryl-CoA dehydrogenase
ENBDON_04747	-	DszC	-	8.4e-08	29.4	0	1.2e-07	28.9	0	1.2	1	0	0	1	1	1	1	Acyl-CoA dehydrogenase
ENBDON_04728	-	DszC	-	1e-07	29.1	0.4	1.9e-07	28.2	0.1	1.7	2	1	0	2	2	2	1	Acyl-CoA dehydrogenase
ENBDON_00822	-	DszC	-	1.2e-07	28.9	0.1	1.5e-07	28.6	0.1	1.2	1	0	0	1	1	1	1	Acyl-CoA dehydrogenase related to the alkylation response protein AidB
ENBDON_00434	-	DszC	-	3.3e-07	27.5	0.2	5.3e-07	26.8	0.2	1.3	1	1	0	1	1	1	1	Acyl-CoA dehydrogenase, short-chain specific
ENBDON_04088	-	DszC	-	5.1e-07	26.8	0.1	2.5e-06	24.5	0	1.8	2	0	0	2	2	2	1	Putative acyl-CoA dehydrogenase
ENBDON_04985	-	DszC	-	6.5e-07	26.5	0	8.5e-07	26.1	0	1.1	1	0	0	1	1	1	1	Acyl CoA dehydrogenase
ENBDON_04445	-	DszC	-	1.5e-06	25.3	0.3	1.3e-05	22.2	0.6	2.3	2	1	0	2	2	2	1	Acyl-CoA dehydrogenase C-terminal domain-containing protein
ENBDON_01429	-	DszC	-	1.9e-06	24.9	0	2.1e-05	21.5	0	1.9	2	0	0	2	2	2	1	Acyl-CoA dehydrogenase
ENBDON_04186	-	DszC	-	1.9e-06	24.9	0.1	2.4e-06	24.6	0.1	1.2	1	0	0	1	1	1	1	Acyl-CoA dehydrogenase
ENBDON_00725	-	DszC	-	2.2e-06	24.7	0.2	2.8e-06	24.4	0.2	1.1	1	0	0	1	1	1	1	Acyl-CoA dehydrogenase
ENBDON_04594	-	DszC	-	3e-06	24.3	0	1.5e-05	22	0	1.9	2	0	0	2	2	2	1	Acyl-CoA dehydrogenase
ENBDON_03213	-	DszC	-	5.5e-06	23.4	0.3	8.1e-06	22.9	0.3	1.2	1	0	0	1	1	1	1	Acyl-CoA dehydrogenase related to the alkylation response protein AidB
ENBDON_03588	-	DszC	-	4.3e-05	20.5	0.5	4.3e-05	20.5	0.5	1.5	2	0	0	2	2	2	1	Isovaleryl-CoA dehydrogenase
ENBDON_04781	-	DszC	-	5e-05	20.3	5.8	0.03	11.1	2.4	2.4	2	1	0	2	2	2	2	Acyl-CoA dehydrogenase
ENBDON_05034	-	DszC	-	6.9e-05	19.8	0	0.0021	14.9	0	2.1	2	0	0	2	2	2	1	acyl-CoA dehydrogenase
ENBDON_00654	-	DszC	-	0.00034	17.5	0	0.00045	17.1	0	1.2	1	0	0	1	1	1	1	Acyl-CoA dehydrogenase
ENBDON_01133	-	DszC	-	0.00083	16.2	0	0.0036	14.2	0	1.9	2	0	0	2	2	2	1	Acyl-CoA dehydrogenase
ENBDON_00722	-	DszC	-	0.0048	13.7	0	0.0066	13.3	0	1.2	1	0	0	1	1	1	1	Acyl-CoA dehydrogenase
ENBDON_00760	-	DszC	-	0.011	12.5	0.3	0.019	11.8	0.2	1.4	1	1	0	1	1	1	0	Acyl-CoA dehydrogenase
ENBDON_01647	-	DszC	-	0.017	12	0	0.027	11.3	0	1.4	1	1	0	1	1	1	0	Butyryl-CoA dehydrogenase
ENBDON_02163	-	EbdA	-	7.4e-76	253.7	7.5	1.7e-27	93.6	0.1	5.1	5	0	0	5	5	5	5	nitrate reductase subunit alpha
ENBDON_00140	-	EbdA	-	4.8e-19	65.6	0.2	2.9e-16	56.4	0.1	2.8	2	1	0	2	2	2	2	Formate dehydrogenase-N subunit alpha
ENBDON_05091	-	EbdA	-	3.7e-17	59.4	0	9.8e-09	31.5	0	3.9	3	1	1	4	4	4	3	Putative nitrate/sulfite reductase
ENBDON_02282	-	EbdA	-	2e-14	50.3	0.2	3.1e-05	19.9	0	4.4	4	1	0	4	4	4	4	Dimethyl sulfoxide/trimethylamine N-oxide reductase
ENBDON_00794	-	EbdA	-	2.5e-14	50	0.1	6.8e-06	22.1	0	4	3	1	1	4	4	4	3	Oxidoreductase
ENBDON_00787	-	EbdA	-	1.1e-13	47.9	0	1.3e-06	24.5	0	3.1	3	1	0	3	3	3	2	4Fe-4S Mo/W bis-MGD-type domain-containing protein
ENBDON_00788	-	EbdA	-	3.4e-09	33	0	0.00019	17.3	0	3.4	3	1	1	4	4	4	3	Formate dehydrogenase-O, major subunit
ENBDON_04458	-	EbdA	-	6.5e-07	25.5	0	0.0002	17.3	0	3.3	3	1	1	4	4	4	2	Molybdopterin oxidoreductase
ENBDON_04926	-	LadA_alpha	-	8.3e-174	576.6	0	9.5e-174	576.4	0	1	1	0	0	1	1	1	1	Flavin-dependent oxidoreductase, luciferase family (includes alkanesulfonate monooxygenase SsuD and methylene tetrahydromethanopterin reductase)
ENBDON_01091	-	LadA_alpha	-	7.7e-100	332.7	0	1e-99	332.3	0	1.1	1	0	0	1	1	1	1	LLM class flavin-dependent oxidoreductase
ENBDON_04263	-	LadA_alpha	-	7.4e-96	319.6	0	1.2e-95	318.9	0	1.2	1	1	0	1	1	1	1	Putative monooxygenase YxeK
ENBDON_04919	-	LadA_alpha	-	1.2e-75	253	0	1.6e-75	252.6	0	1	1	0	0	1	1	1	1	Luciferase-like domain-containing protein
ENBDON_04912	-	LadA_alpha	-	4.4e-74	247.8	0	7.3e-74	247.1	0	1.2	1	0	0	1	1	1	1	Nitrilotriacetate monooxygenase component A
ENBDON_04911	-	LadA_alpha	-	8.1e-51	171.1	0	2.8e-38	129.8	0	2.9	1	1	1	2	2	2	2	Luciferase-like domain-containing protein
ENBDON_04918	-	LadA_alpha	-	1.5e-33	114.2	0.1	5.8e-33	112.3	0.1	1.9	2	1	0	2	2	2	1	Luciferase-like domain-containing protein
ENBDON_04923	-	LadA_alpha	-	1.1e-20	71.8	0	2.3e-11	41	0	2.2	1	1	1	2	2	2	2	Alkanesulfonate monooxygenase
ENBDON_01735	-	LadA_alpha	-	9.9e-19	65.3	0.1	3e-08	30.8	0	3	1	1	2	3	3	3	2	pyrimidine utilization protein A
ENBDON_04928	-	LadA_alpha	-	4.3e-14	50.1	0	1e-06	25.7	0	3.1	1	1	2	3	3	3	2	dimethyl sulfone monooxygenase SfnG
ENBDON_04187	-	LadA_alpha	-	1.2e-07	28.8	0	6.9e-05	19.7	0	2.1	1	1	1	2	2	2	2	Luciferase-like domain-containing protein
ENBDON_00806	-	LadA_alpha	-	5.8e-07	26.6	0	1.8e-05	21.6	0	2.4	2	1	1	3	3	3	1	Flavin-dependent oxidoreductase, luciferase family (includes alkanesulfonate monooxygenase SsuD and methylene tetrahydromethanopterin reductase)
ENBDON_04080	-	LadA_alpha	-	1.4e-06	25.3	0	0.0045	13.7	0	2.3	1	1	1	2	2	2	2	Luciferase-like monooxygenase (Modular protein)
ENBDON_04922	-	LadA_alpha	-	7e-06	23	0	0.0017	15.1	0	2	1	1	1	2	2	2	2	Luciferase-like domain-containing protein
ENBDON_01044	-	LadA_alpha	-	3e-05	20.9	0	0.0025	14.6	0	2.1	1	1	1	2	2	2	1	Luciferase-like domain-containing protein
ENBDON_00184	-	LadA_alpha	-	6.2e-05	19.8	0	0.045	10.4	0	2.5	1	1	2	3	3	3	2	F420-dependent oxidoreductase
ENBDON_04934	-	LadA_alpha	-	7.9e-05	19.5	0	0.11	9.2	0	2.3	2	0	0	2	2	2	2	Long-chain-fatty-acid--CoA ligase
ENBDON_04749	-	LadA_alpha	-	0.0001	19.1	0.1	0.14	8.8	0	3	1	1	2	3	3	3	1	LLM class flavin-dependent oxidoreductase
ENBDON_01092	-	LadA_alpha	-	0.00048	16.9	0	0.1	9.3	0	2.1	1	1	1	2	2	2	2	F420-dependent oxidoreductase
ENBDON_00232	-	LadA_alpha	-	0.00065	16.5	0	0.0018	15.1	0	1.6	2	0	0	2	2	2	1	Methylene-tetrahydromethanopterin reductase
ENBDON_04738	-	LadA_alpha	-	0.00072	16.3	0	0.0071	13.1	0	2.1	2	0	0	2	2	2	1	Luciferase-like domain-containing protein
ENBDON_04276	-	LadA_alpha	-	0.0014	15.4	0	0.0019	14.9	0	1.1	1	0	0	1	1	1	1	Luciferase-like domain-containing protein
ENBDON_04886	-	LadA_alpha	-	0.023	11.4	0	0.27	7.9	0	2	2	0	0	2	2	2	0	Fmn-dependent monooxygenase
ENBDON_00746	-	LadA_alpha	-	0.031	11	0	0.049	10.3	0	1.3	1	0	0	1	1	1	0	Luciferase-like domain-containing protein
ENBDON_01091	-	LadA_beta	-	7.4e-165	547.1	0	9e-165	546.8	0	1	1	0	0	1	1	1	1	LLM class flavin-dependent oxidoreductase
ENBDON_04263	-	LadA_beta	-	1.9e-129	430.4	0	2.3e-129	430.2	0	1	1	0	0	1	1	1	1	Putative monooxygenase YxeK
ENBDON_04912	-	LadA_beta	-	4.7e-108	359.9	0	7e-108	359.3	0	1.1	1	0	0	1	1	1	1	Nitrilotriacetate monooxygenase component A
ENBDON_04919	-	LadA_beta	-	2e-104	347.9	0	2.5e-104	347.6	0	1	1	0	0	1	1	1	1	Luciferase-like domain-containing protein
ENBDON_04926	-	LadA_beta	-	6.4e-87	290.3	0	8.1e-87	289.9	0	1.1	1	0	0	1	1	1	1	Flavin-dependent oxidoreductase, luciferase family (includes alkanesulfonate monooxygenase SsuD and methylene tetrahydromethanopterin reductase)
ENBDON_04911	-	LadA_beta	-	2e-61	206.2	0	2.5e-47	159.8	0	2.8	1	1	1	2	2	2	2	Luciferase-like domain-containing protein
ENBDON_04918	-	LadA_beta	-	1.1e-52	177.4	0	3.3e-51	172.6	0	2	2	0	0	2	2	2	1	Luciferase-like domain-containing protein
ENBDON_01735	-	LadA_beta	-	3e-20	70.5	0	1.4e-11	42	0	3	2	1	1	3	3	3	3	pyrimidine utilization protein A
ENBDON_01092	-	LadA_beta	-	1e-12	45.7	0	2.3e-08	31.4	0	2.3	2	1	1	3	3	3	2	F420-dependent oxidoreductase
ENBDON_04928	-	LadA_beta	-	1e-10	39.1	0.3	1.1e-07	29.2	0.1	2.8	2	1	0	2	2	2	2	dimethyl sulfone monooxygenase SfnG
ENBDON_00290	-	LadA_beta	-	7.2e-08	29.8	0	0.0027	14.6	0	2.3	2	1	1	3	3	3	2	F420-dependent oxidoreductase
ENBDON_00184	-	LadA_beta	-	1.1e-07	29.1	0	0.00023	18.2	0	2.1	1	1	1	2	2	2	2	F420-dependent oxidoreductase
ENBDON_04923	-	LadA_beta	-	2e-06	25	0	0.017	12	0	2.6	2	1	1	3	3	3	2	Alkanesulfonate monooxygenase
ENBDON_04886	-	LadA_beta	-	3e-06	24.4	0	4.6e-06	23.8	0	1.3	1	0	0	1	1	1	1	Fmn-dependent monooxygenase
ENBDON_04934	-	LadA_beta	-	4.2e-06	23.9	0	0.022	11.7	0	2.8	3	0	0	3	3	3	2	Long-chain-fatty-acid--CoA ligase
ENBDON_04988	-	LadA_beta	-	2.4e-05	21.4	0	0.00063	16.8	0	2	1	1	1	2	2	2	1	Luciferase-like domain-containing protein
ENBDON_04276	-	LadA_beta	-	3.7e-05	20.8	0	4.9e-05	20.4	0	1.1	1	0	0	1	1	1	1	Luciferase-like domain-containing protein
ENBDON_04288	-	LadA_beta	-	5.1e-05	20.4	0	6.8e-05	19.9	0	1.1	1	0	0	1	1	1	1	Luciferase-like domain-containing protein
ENBDON_04922	-	LadA_beta	-	5.2e-05	20.3	0	0.0092	12.9	0	2	1	1	1	2	2	2	2	Luciferase-like domain-containing protein
ENBDON_01044	-	LadA_beta	-	0.00013	19	0	0.00085	16.3	0	1.9	1	1	1	2	2	2	1	Luciferase-like domain-containing protein
ENBDON_04080	-	LadA_beta	-	0.0005	17.1	0	0.0017	15.4	0	1.8	1	1	1	2	2	2	1	Luciferase-like monooxygenase (Modular protein)
ENBDON_04187	-	LadA_beta	-	0.00075	16.5	0	0.0012	15.9	0	1.3	1	1	0	1	1	1	1	Luciferase-like domain-containing protein
ENBDON_04083	-	LadA_beta	-	0.01	12.8	0	0.039	10.8	0	1.8	2	0	0	2	2	2	0	Alkane 1-monooxygenase
ENBDON_04749	-	LadA_beta	-	0.011	12.6	0	2.2	5.1	0	2.4	1	1	2	3	3	3	0	LLM class flavin-dependent oxidoreductase
ENBDON_00806	-	LadA_beta	-	0.042	10.8	0	0.097	9.6	0	1.5	2	0	0	2	2	2	0	Flavin-dependent oxidoreductase, luciferase family (includes alkanesulfonate monooxygenase SsuD and methylene tetrahydromethanopterin reductase)
ENBDON_03869	-	LadA_beta	-	0.062	10.2	0	0.18	8.6	0	1.7	1	1	1	2	2	2	0	glucose-6-phosphate dehydrogenase (coenzyme-F420)
ENBDON_04923	-	LadB	-	7.2e-84	279.9	0	9.6e-84	279.5	0	1	1	0	0	1	1	1	1	Alkanesulfonate monooxygenase
ENBDON_04928	-	LadB	-	2.6e-47	159.6	0.1	1.8e-46	156.8	0.1	1.9	1	1	0	1	1	1	1	dimethyl sulfone monooxygenase SfnG
ENBDON_01735	-	LadB	-	1.9e-26	90.9	0.5	5.8e-25	86	0.1	2	2	0	0	2	2	2	1	pyrimidine utilization protein A
ENBDON_04263	-	LadB	-	6.1e-22	76.1	0	4.8e-13	46.8	0.1	3.1	3	0	0	3	3	3	2	Putative monooxygenase YxeK
ENBDON_04919	-	LadB	-	6.2e-19	66.2	0.1	6e-13	46.5	0	3.1	3	1	0	3	3	3	2	Luciferase-like domain-containing protein
ENBDON_04912	-	LadB	-	2.9e-18	64	0.1	4.9e-16	56.6	0	2.7	2	1	0	2	2	2	1	Nitrilotriacetate monooxygenase component A
ENBDON_01091	-	LadB	-	1.3e-17	61.8	0	7.3e-12	42.9	0	2.7	3	0	0	3	3	3	2	LLM class flavin-dependent oxidoreductase
ENBDON_04749	-	LadB	-	1.5e-17	61.6	0	2.9e-15	54.1	0	2	1	1	0	2	2	2	1	LLM class flavin-dependent oxidoreductase
ENBDON_04926	-	LadB	-	7.6e-17	59.3	0	1.4e-13	48.5	0	2.6	3	0	0	3	3	3	2	Flavin-dependent oxidoreductase, luciferase family (includes alkanesulfonate monooxygenase SsuD and methylene tetrahydromethanopterin reductase)
ENBDON_00290	-	LadB	-	4e-16	56.9	0	5.2e-16	56.6	0	1.2	1	0	0	1	1	1	1	F420-dependent oxidoreductase
ENBDON_01092	-	LadB	-	2.4e-14	51.1	0	6.9e-14	49.6	0	1.6	1	1	1	2	2	2	1	F420-dependent oxidoreductase
ENBDON_00746	-	LadB	-	3.8e-14	50.4	0	2.6e-13	47.7	0	1.9	2	0	0	2	2	2	1	Luciferase-like domain-containing protein
ENBDON_03869	-	LadB	-	4.7e-14	50.1	0	6.3e-14	49.7	0	1.1	1	0	0	1	1	1	1	glucose-6-phosphate dehydrogenase (coenzyme-F420)
ENBDON_04700	-	LadB	-	1.6e-13	48.4	0	2.1e-13	47.9	0	1.1	1	0	0	1	1	1	1	glucose-6-phosphate dehydrogenase (coenzyme-F420)
ENBDON_04187	-	LadB	-	1.5e-12	45.2	0	3.1e-12	44.1	0	1.4	1	1	0	2	2	2	1	Luciferase-like domain-containing protein
ENBDON_04738	-	LadB	-	8.8e-12	42.6	0	1.1e-11	42.3	0	1.2	1	0	0	1	1	1	1	Luciferase-like domain-containing protein
ENBDON_04080	-	LadB	-	1.2e-11	42.1	0	2.2e-11	41.3	0	1.3	1	0	0	1	1	1	1	Luciferase-like monooxygenase (Modular protein)
ENBDON_04934	-	LadB	-	2.2e-11	41.3	0	5.6e-09	33.4	0	2.1	1	1	1	2	2	2	2	Long-chain-fatty-acid--CoA ligase
ENBDON_00184	-	LadB	-	5.5e-11	40	0	2.7e-09	34.5	0	2	1	1	1	2	2	2	1	F420-dependent oxidoreductase
ENBDON_01044	-	LadB	-	2.3e-10	38	0	7.1e-10	36.4	0	1.7	2	0	0	2	2	2	1	Luciferase-like domain-containing protein
ENBDON_00797	-	LadB	-	4e-09	33.9	0	3.8e-08	30.7	0	1.9	2	0	0	2	2	2	1	Flavin-dependent oxidoreductase, luciferase family (includes alkanesulfonate monooxygenase SsuD and methylene tetrahydromethanopterin reductase)
ENBDON_04911	-	LadB	-	4.2e-09	33.8	0	0.00032	17.7	0	2.9	3	0	0	3	3	3	2	Luciferase-like domain-containing protein
ENBDON_04918	-	LadB	-	9.5e-08	29.4	0.2	1.9e-05	21.8	0.3	2.4	2	0	0	2	2	2	1	Luciferase-like domain-containing protein
ENBDON_01210	-	LadB	-	3.8e-07	27.4	0	7.3e-07	26.5	0	1.4	1	0	0	1	1	1	1	F420-dependent oxidoreductase
ENBDON_04276	-	LadB	-	4e-07	27.3	0	6.1e-07	26.7	0	1.2	1	0	0	1	1	1	1	Luciferase-like domain-containing protein
ENBDON_00936	-	LadB	-	2.1e-06	24.9	0	3.4e-06	24.2	0	1.3	1	0	0	1	1	1	1	N5,N10-methylene tetrahydromethanopterin reductase
ENBDON_04078	-	LadB	-	2.9e-06	24.5	0	3.9e-06	24	0	1.2	1	0	0	1	1	1	1	Luciferase-like, subgroup
ENBDON_04886	-	LadB	-	3e-05	21.1	0	0.094	9.6	0	2.3	2	0	0	2	2	2	2	Fmn-dependent monooxygenase
ENBDON_04083	-	LadB	-	0.005	13.8	0	0.0073	13.3	0	1.3	1	0	0	1	1	1	1	Alkane 1-monooxygenase
ENBDON_00750	-	LadB	-	0.0056	13.7	0	0.0083	13.1	0	1.1	1	0	0	1	1	1	1	Putative enzyme
ENBDON_04288	-	LadB	-	0.026	11.5	0.1	0.037	11	0.1	1.1	1	0	0	1	1	1	0	Luciferase-like domain-containing protein
ENBDON_04552	-	LadB	-	0.033	11.1	0	0.049	10.6	0	1.2	1	0	0	1	1	1	0	F420-dependent N(5),N(10)-methylenetetrahydromethanopterin reductase
ENBDON_04988	-	LadB	-	0.07	10	0	0.98	6.3	0	2	1	1	0	1	1	1	0	Luciferase-like domain-containing protein
ENBDON_04448	-	MAH_alpha	-	2.9e-64	215.6	0.1	3.5e-64	215.3	0.1	1	1	0	0	1	1	1	1	Rieske domain-containing protein
ENBDON_04674	-	MAH_alpha	-	5.8e-59	198.1	0.1	7.8e-59	197.7	0.1	1	1	0	0	1	1	1	1	benzoate 1,2-dioxygenase large subunit
ENBDON_00823	-	MAH_alpha	-	1.5e-35	120.9	0	2.1e-35	120.5	0	1.1	1	0	0	1	1	1	1	Phenylpropionate dioxygenase or related ring-hydroxylating dioxygenase, large terminal subunit
ENBDON_00815	-	MAH_alpha	-	1.4e-28	97.9	0	2.2e-28	97.3	0	1.2	1	0	0	1	1	1	1	Phenylpropionate dioxygenase or related ring-hydroxylating dioxygenase, large terminal subunit
ENBDON_00781	-	MAH_alpha	-	9.4e-27	91.9	0	1.5e-26	91.3	0	1.3	1	0	0	1	1	1	1	Ribosomal subunit interface protein
ENBDON_04073	-	MAH_alpha	-	2.2e-05	21.5	0.1	3.5e-05	20.8	0.1	1.2	1	0	0	1	1	1	1	Rieske-type oxygenase
ENBDON_00710	-	MAH_alpha	-	5.8e-05	20.1	0.1	8.7e-05	19.5	0.1	1.2	1	0	0	1	1	1	1	Rieske-type oxygenase
ENBDON_04201	-	MAH_alpha	-	0.00026	18	0	0.0004	17.4	0	1.2	1	0	0	1	1	1	1	Rieske-type oxygenase
ENBDON_03965	-	MAH_alpha	-	0.00079	16.4	0	0.0012	15.7	0	1.2	1	0	0	1	1	1	1	Rieske-type oxygenase
ENBDON_00276	-	MAH_alpha	-	0.013	12.4	0	0.018	11.9	0	1.1	1	0	0	1	1	1	0	Vanillate O-demethylase oxygenase subunit (4-hydroxy-3-methoxybenzoate demethylase)
ENBDON_04643	-	MAH_alpha	-	0.028	11.3	0	0.065	10.1	0	1.5	2	0	0	2	2	2	0	3-phenylpropionate dioxygenase
ENBDON_04675	-	MAH_beta	-	6.9e-12	43.5	1.7	1.6e-11	42.4	1.7	1.7	1	1	0	1	1	1	1	benzoate 1,2-dioxygenase small subunit
ENBDON_04449	-	MAH_beta	-	0.00025	18.9	2.4	0.00077	17.3	2.4	1.7	1	1	0	1	1	1	1	Aromatic-ring-hydroxylating dioxygenase
ENBDON_04674	-	NdoB	-	2e-68	229.4	0.2	2.6e-68	229	0.2	1	1	0	0	1	1	1	1	benzoate 1,2-dioxygenase large subunit
ENBDON_04448	-	NdoB	-	2.6e-67	225.7	0.1	3.1e-67	225.5	0.1	1	1	0	0	1	1	1	1	Rieske domain-containing protein
ENBDON_00823	-	NdoB	-	8.7e-38	128.4	0	1.2e-37	127.9	0	1.1	1	0	0	1	1	1	1	Phenylpropionate dioxygenase or related ring-hydroxylating dioxygenase, large terminal subunit
ENBDON_00815	-	NdoB	-	1.6e-37	127.6	0	2.7e-37	126.8	0	1.3	1	0	0	1	1	1	1	Phenylpropionate dioxygenase or related ring-hydroxylating dioxygenase, large terminal subunit
ENBDON_00781	-	NdoB	-	3.9e-30	103.2	0.2	2.2e-29	100.8	0.1	2.1	2	1	0	2	2	2	1	Ribosomal subunit interface protein
ENBDON_00710	-	NdoB	-	8.2e-07	26.3	0	2.1e-06	24.9	0.1	1.6	2	0	0	2	2	2	1	Rieske-type oxygenase
ENBDON_04073	-	NdoB	-	2.5e-05	21.4	0.1	3.9e-05	20.8	0.1	1.2	1	0	0	1	1	1	1	Rieske-type oxygenase
ENBDON_03598	-	NdoB	-	2.9e-05	21.2	0	3.7e-05	20.9	0	1.1	1	0	0	1	1	1	1	Cytochrome bc1 complex Rieske iron-sulfur subunit
ENBDON_04201	-	NdoB	-	3.9e-05	20.8	0	6.4e-05	20.1	0	1.2	1	0	0	1	1	1	1	Rieske-type oxygenase
ENBDON_03601	-	NdoB	-	6.1e-05	20.2	0	7.6e-05	19.8	0	1	1	0	0	1	1	1	1	Cytochrome bc1 complex Rieske iron-sulfur subunit
ENBDON_00276	-	NdoB	-	0.00016	18.8	0	0.00023	18.2	0	1.2	1	0	0	1	1	1	1	Vanillate O-demethylase oxygenase subunit (4-hydroxy-3-methoxybenzoate demethylase)
ENBDON_03965	-	NdoB	-	0.00022	18.3	0	0.00035	17.7	0	1.3	1	0	0	1	1	1	1	Rieske-type oxygenase
ENBDON_02570	-	NdoB	-	0.011	12.8	0	0.012	12.6	0	1	1	0	0	1	1	1	0	2Fe-2S ferredoxin
ENBDON_04643	-	NdoB	-	0.013	12.5	0.1	0.054	10.4	0	1.8	2	0	0	2	2	2	0	3-phenylpropionate dioxygenase
ENBDON_04675	-	NdoC	-	7.2e-16	56.5	0.1	9.2e-16	56.2	0.1	1.1	1	0	0	1	1	1	1	benzoate 1,2-dioxygenase small subunit
ENBDON_04206	-	NdoC	-	1.5e-06	26.2	0.2	0.0039	15	0.4	2	2	0	0	2	2	2	2	SnoaL-like domain-containing protein
ENBDON_04449	-	NdoC	-	2.1e-05	22.4	2.8	4.3e-05	21.4	2.7	1.4	1	1	0	1	1	1	1	Aromatic-ring-hydroxylating dioxygenase
ENBDON_04725	-	NdoC	-	0.0065	14.3	0	0.0089	13.9	0	1.1	1	0	0	1	1	1	1	Aromatic ring hydroxylating dioxygenase subunt beta
ENBDON_00815	-	non_NdoB_type	-	1.1e-84	283	1	7e-84	280.4	1	1.8	1	1	0	1	1	1	1	Phenylpropionate dioxygenase or related ring-hydroxylating dioxygenase, large terminal subunit
ENBDON_00823	-	non_NdoB_type	-	1.5e-79	266.1	1.2	5.7e-79	264.2	1.2	1.7	1	1	0	1	1	1	1	Phenylpropionate dioxygenase or related ring-hydroxylating dioxygenase, large terminal subunit
ENBDON_00781	-	non_NdoB_type	-	7e-72	240.9	0.6	6.4e-71	237.7	0.6	1.9	1	1	0	1	1	1	1	Ribosomal subunit interface protein
ENBDON_04448	-	non_NdoB_type	-	5.8e-63	211.5	0	7.4e-63	211.2	0	1.1	1	0	0	1	1	1	1	Rieske domain-containing protein
ENBDON_04674	-	non_NdoB_type	-	1.8e-55	186.9	0.1	2.3e-55	186.5	0.1	1.1	1	0	0	1	1	1	1	benzoate 1,2-dioxygenase large subunit
ENBDON_04073	-	non_NdoB_type	-	5.2e-19	66.8	1	7.4e-19	66.3	0.8	1.3	1	1	0	1	1	1	1	Rieske-type oxygenase
ENBDON_04201	-	non_NdoB_type	-	8.6e-18	62.8	0.5	2.4e-17	61.3	0.5	1.8	1	1	0	1	1	1	1	Rieske-type oxygenase
ENBDON_00710	-	non_NdoB_type	-	1.6e-15	55.3	0.3	2.3e-15	54.8	0.3	1.3	1	0	0	1	1	1	1	Rieske-type oxygenase
ENBDON_03965	-	non_NdoB_type	-	3.2e-15	54.3	0.3	4.7e-15	53.8	0.3	1.3	1	0	0	1	1	1	1	Rieske-type oxygenase
ENBDON_00276	-	non_NdoB_type	-	1.3e-13	49.1	0	1.8e-13	48.6	0	1.1	1	0	0	1	1	1	1	Vanillate O-demethylase oxygenase subunit (4-hydroxy-3-methoxybenzoate demethylase)
ENBDON_04643	-	non_NdoB_type	-	1.2e-08	32.7	0	6.1e-08	30.3	0	1.9	2	1	0	2	2	2	1	3-phenylpropionate dioxygenase
ENBDON_02570	-	non_NdoB_type	-	5e-08	30.6	0	6e-08	30.3	0	1	1	0	0	1	1	1	1	2Fe-2S ferredoxin
ENBDON_03598	-	non_NdoB_type	-	0.00033	18	0	0.0004	17.8	0	1.1	1	0	0	1	1	1	1	Cytochrome bc1 complex Rieske iron-sulfur subunit
ENBDON_03601	-	non_NdoB_type	-	0.0049	14.2	0	0.0064	13.8	0	1.1	1	0	0	1	1	1	1	Cytochrome bc1 complex Rieske iron-sulfur subunit
ENBDON_05051	-	PrmA	-	0	1293.1	10.7	0	1292.9	10.7	1	1	0	0	1	1	1	1	propane 2-monooxygenase
ENBDON_05049	-	PrmC	-	4.9e-231	764.4	0.9	5.4e-231	764.2	0.9	1	1	0	0	1	1	1	1	propane 2-monooxygenase
ENBDON_05051	-	sBmoX	-	1.8e-70	236	10.6	1.7e-69	232.8	10.6	1.9	1	1	0	1	1	1	1	propane 2-monooxygenase
ENBDON_03347	-	sBmoX	-	0.019	11.6	0	0.03	10.9	0	1.2	1	0	0	1	1	1	0	NAD(P)H-quinone dehydrogenase
ENBDON_05049	-	sBmoY	-	1.8e-21	74.8	0.4	2.3e-21	74.5	0.4	1	1	0	0	1	1	1	1	propane 2-monooxygenase
ENBDON_05051	-	TmoA_BmoA	-	1e-34	118.4	7.4	1.4e-34	118	7.4	1.1	1	0	0	1	1	1	1	propane 2-monooxygenase
ENBDON_05049	-	TmoE	-	3.4e-15	54.3	1.9	1.2e-14	52.5	1.9	1.9	1	1	0	1	1	1	1	propane 2-monooxygenase
ENBDON_05051	-	TmoE	-	5.5e-08	30.6	0	9.1e-08	29.8	0	1.3	1	0	0	1	1	1	1	propane 2-monooxygenase
ENBDON_05049	-	TomA1	-	1.4e-09	35.9	1.7	2.6e-09	35	1.7	1.6	1	1	0	1	1	1	1	propane 2-monooxygenase
ENBDON_05051	-	TomA3	-	9.9e-19	65.3	6.6	1.3e-18	64.9	6.6	1	1	0	0	1	1	1	1	propane 2-monooxygenase
