# Supplementary figures and images for: Whole Genome of Petroleum Hydrocarbon Degrading Rhodococcus indonesiensis isolated from Nacharam, Hyderabad, India
Source: Research Square preprint supplement (doi:10.21203/rs.3.rs-6309542/v1), 2025-09-26

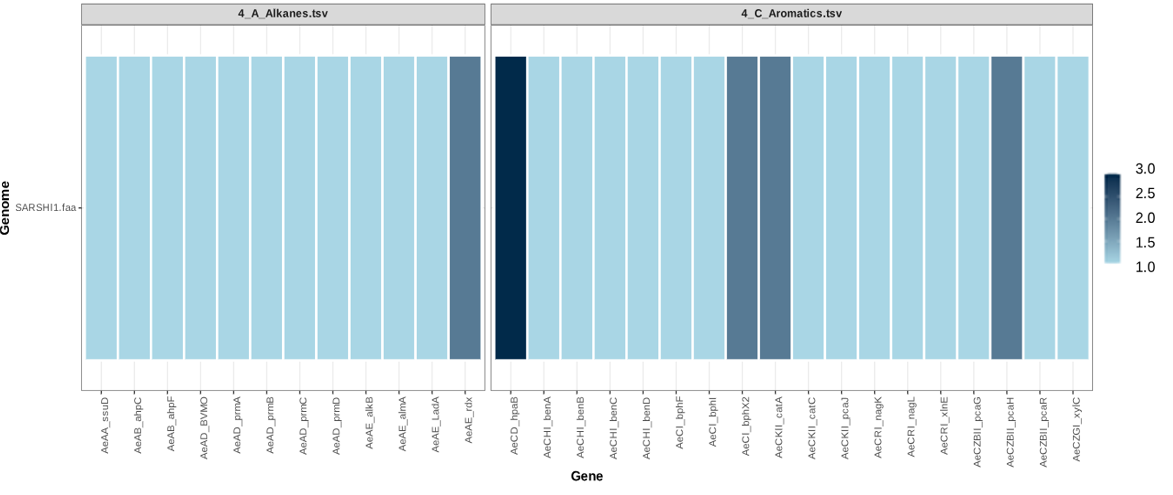


**Fig.1 SARSHI1: Alkane and Aromatic Hydrocarbon Genes**

Supplement: Supplementary file 12 [file ad67abeca238f3848532b899.docx]
